# Supplementary material for: Symbiotic Human Gut Bacteria with Variable Metabolic Priorities for Host Mucosal Glycans
Source: PubMed Central journal article supplement — mBio. 2015 Nov 10;6(6):e01282-15. doi: 10.1128/mBio.01282-15 (PMC4659458; doi:10.1128/mbio.01282-15), 2015-11-10
Supplement: mbo006152544st1.pdf [file mbo006152544st1.pdf]

| Table S1. Growth of <i>Bacteroides</i> strains on different carbohydrates |                                     |             |                                 |             |                              |             |
|---------------------------------------------------------------------------|-------------------------------------|-------------|---------------------------------|-------------|------------------------------|-------------|
|                                                                           | <i>B. thetaiotaomicron</i> VPI-5482 |             | <i>B. massiliensis</i> DSM17679 |             | <i>B. fragilis</i> NCTC 9343 |             |
|                                                                           | <u>growth</u>                       | <u>rate</u> | <u>growth</u>                   | <u>rate</u> | <u>growth</u>                | <u>rate</u> |
| <b>Polysaccharides:</b>                                                   |                                     |             |                                 |             |                              |             |
| Pullulan                                                                  | 1.23                                | 0.00215     | 0.15                            | 0.00006     | 1.27                         | 0.00096     |
| glycogen                                                                  | 1.17                                | 0.00200     | 0.24                            | 0.00017     | 0.69                         | 0.00016     |
| amylopectin (potato)                                                      | 0.83                                | 0.00128     | 0.41                            | 0.00011     | 0.53                         | 0.00036     |
| inulin                                                                    | 0.63                                | 0.00027     | 0.00                            | 0.00000     | 0.92                         | 0.00070     |
| levan                                                                     | 0.73                                | 0.00119     | 0.00                            | 0.00        | 0.00                         | 0.00000     |
| heparin                                                                   | 0.46                                | 0.00087     | 0.00                            | 0.00000     | 0.00                         | 0.00000     |
| hyaluronan                                                                | 1.20                                | 0.00182     | 0.00                            | 0.00000     | 0.00                         | 0.00000     |
| chondroitin sulfate                                                       | 0.75                                | 0.00170     | 0.11                            | 0.00003     | 0.00                         | 0.00000     |
| homogalacturonan                                                          | 0.89                                | 0.00199     | 0.00                            | 0.00000     | 0.00                         | 0.00000     |
| rhamnogalacturonan I                                                      | 0.64                                | 0.00052     | 0.00                            | 0.00000     | 0.15                         | 0.00004     |
| pectic galactan (potato)                                                  | 1.14                                | 0.00261     | 0.00                            | 0.00000     | 0.00                         | 0.00000     |
| pectic galactan (lupin)                                                   | 0.89                                | 0.00146     | 0.00                            | 0.00000     | 0.00                         | 0.00000     |
| arabinogalactan (larch)                                                   | 0.90                                | 0.00113     | 0.00                            | 0.00000     | 0.00                         | 0.00000     |
| arabinan (sugar beet)                                                     | 0.65                                | 0.00100     | 0.00                            | 0.00000     | 0.00                         | 0.00000     |
| xylan (water soluble, oat spelt)                                          | 0.00                                | 0.00000     | 0.00                            | 0.00000     | 0.00                         | 0.00000     |
| arabinoxylan (wheat)                                                      | 0.00                                | 0.00000     | 0.00                            | 0.00000     | 0.00                         | 0.00000     |
| galactomannan (carob)                                                     | 0.00                                | 0.00000     | 0.00                            | 0.00000     | 0.00                         | 0.00000     |
| glucomannan (konjac)                                                      | 0.00                                | 0.00000     | 0.00                            | 0.00000     | 0.00                         | 0.00000     |
| xyloglucan                                                                | 0.00                                | 0.00000     | 0.00                            | 0.00000     | 0.00                         | 0.00000     |
| β-glucan                                                                  | 0.00                                | 0.00000     | 0.00                            | 0.00000     | 0.00                         | 0.00000     |
| cellobiose                                                                | 0.00                                | 0.00000     | 0.00                            | 0.00000     | 0.00                         | 0.00000     |
| laminarin                                                                 | 0.00                                | 0.00000     | 0.00                            | 0.00000     | 0.00                         | 0.00000     |
| lichenin                                                                  | 0.00                                | 0.00000     | 0.00                            | 0.00000     | 0.00                         | 0.00000     |
| dextran                                                                   | 1.33                                | 0.00255     | 0.00                            | 0.00000     | 0.00                         | 0.00000     |
| α-mannan                                                                  | 0.60                                | 0.00070     | 0.00                            | 0.00000     | 0.00                         | 0.00000     |
| alginate                                                                  | 0.00                                | 0.00000     | 0.00                            | 0.00000     | 0.00                         | 0.00000     |
| κ-carrageenan                                                             | 0.00                                | 0.00000     | 0.00                            | 0.00000     | 0.00                         | 0.00000     |
| porphyran                                                                 | 0.00                                | 0.00000     | 0.00                            | 0.00000     | 0.00                         | 0.00000     |
| porcine gastric mucus O-glycans (PMOG)                                    | 0.55                                | 0.00020     | 0.97                            | 0.00118     | 0.72                         | 0.00043     |
|                                                                           |                                     |             |                                 |             |                              |             |
| <b>Monosaccharides:</b>                                                   |                                     |             |                                 |             |                              |             |
| arabinose                                                                 | 1.30                                | 0.00261     | 0.00                            | 0.00000     | 0.00                         | 0.00000     |

|                          |      |         |      |         |      |         |
|--------------------------|------|---------|------|---------|------|---------|
| fructose                 | 1.18 | 0.00191 | 0.00 | 0.00000 | 0.80 | 0.00107 |
| fucose                   | 0.38 | 0.00035 | 0.00 | 0.00000 | 0.00 | 0.00000 |
| galactose                | 1.39 | 0.00259 | 0.00 | 0.00000 | 0.30 | 0.00031 |
| galacturonic acid        | 0.78 | 0.00079 | 0.00 | 0.00000 | 0.00 | 0.00000 |
| glucuronic acid          | 0.85 | 0.00073 | 0.00 | 0.00000 | 0.00 | 0.00000 |
| glucosamine              | 0.71 | 0.00026 | 0.30 | 0.00008 | 0.62 | 0.00031 |
| glucose                  | 1.28 | 0.00223 | 0.00 | 0.00000 | 0.94 | 0.00110 |
| mannose                  | 1.37 | 0.00239 | 0.00 | 0.00000 | 0.79 | 0.00096 |
| N-acetyl galactosamine   | 0.75 | 0.00071 | 0.73 | 0.00101 | 0.40 | 0.00016 |
| N-acetyl glucosamine     | 1.00 | 0.00140 | 1.09 | 0.00108 | 0.54 | 0.00051 |
| N-acetyl neuraminic acid | 0.00 | 0.00000 | 0.71 | 0.00050 | 0.23 | 0.00012 |
| rhamnose                 | 0.67 | 0.00091 | 0.00 | 0.00000 | 0.00 | 0.00000 |
| ribose                   | 1.21 | 0.00143 | 0.00 | 0.00000 | 0.00 | 0.00000 |
| xylose                   | 0.98 | 0.00207 | 0.00 | 0.00000 | 0.93 | 0.00112 |

Growth is measured as maximum increase in absorbance at 600nm relative to a pre-growth baseline, while rate is measured as the growth value defined above, divided by the time to reach maximum growth, both as previously described (Martens et al. PLoS Biology 2011) .
