# Supplementary material for: Symbiotic Human Gut Bacteria with Variable Metabolic Priorities for Host Mucosal Glycans
Source: PubMed Central journal article supplement — mBio. 2015 Nov 10;6(6):e01282-15. doi: 10.1128/mBio.01282-15 (PMC4659458; doi:10.1128/mbio.01282-15), 2015-11-10
Supplement: mbo006152544st2.pdf [file mbo006152544st2.pdf]

| Table S2. Expression changes in <i>B. massiliensis</i> during growth in neutral porcine mucin O-glycans (PMOG) relative to growth in N-acetylglucosamine (GlcNAc) |                                                                                             |         |         |                             |                  |                  |                  |                    |                  |                  |  |
|-------------------------------------------------------------------------------------------------------------------------------------------------------------------|---------------------------------------------------------------------------------------------|---------|---------|-----------------------------|------------------|------------------|------------------|--------------------|------------------|------------------|--|
| Formatting descriptions and notes:                                                                                                                                |                                                                                             |         |         |                             |                  |                  |                  |                    |                  |                  |  |
| Color-coding for PUL genes that are upregulated more than 3-fold in PMOG relative to GlcNAc                                                                       |                                                                                             |         |         |                             |                  |                  |                  |                    |                  |                  |  |
| Color-coding for genes associated with upregulated PULs that are not themselves upregulated more than 3-fold in PMOG relative to GlcNAc                           |                                                                                             |         |         |                             |                  |                  |                  |                    |                  |                  |  |
| <i>B. massiliensis</i> starch utilization PUL genes                                                                                                               |                                                                                             |         |         |                             |                  |                  |                  |                    |                  |                  |  |
| Other putative PULs (minimum susC-/susD-like gene pair) that are not regulated in response to PMOG                                                                |                                                                                             |         |         |                             |                  |                  |                  |                    |                  |                  |  |
| PUL genes in bold text represent <i>susC</i> homologs probed by qPCR during growth in starch and PMOG mixtures                                                    |                                                                                             |         |         |                             |                  |                  |                  |                    |                  |                  |  |
| <sup>1</sup> Values shown are RPKM normalized counts                                                                                                              |                                                                                             |         |         |                             |                  |                  |                  |                    |                  |                  |  |
|                                                                                                                                                                   |                                                                                             |         |         | GlcNAc1                     | GlcNAc2          | GlcNAc3          | PMOG1            | PMOG2              | PMOG3            |                  |  |
|                                                                                                                                                                   |                                                                                             |         |         | <b>Total mapped reads :</b> | <b>5,872,261</b> | <b>5,050,601</b> | <b>4,822,703</b> | <b>5,581,153</b>   | <b>6,482,255</b> | <b>6,466,140</b> |  |
| Locus Tag                                                                                                                                                         | Description                                                                                 | GlcNAc1 | GlcNAc2 | GlcNAc3                     | PMOG1            | PMOG2            | PMOG3            | Fold (PMOG/GlcNAc) | P value          |                  |  |
| B035DRAFT_00001                                                                                                                                                   | Response regulator containing CheY-like receiver, AAA-type ATPase, and DNA-binding domains  | 64.2    | 50.5    | 60.5                        | 57.1             | 49.5             | 23.6             | 0.70               | 4.8E-01          |                  |  |
| B035DRAFT_00002                                                                                                                                                   | Signal transduction histidine kinase                                                        | 73.9    | 58.8    | 64.0                        | 70.0             | 71.4             | 52.8             | 0.98               | 9.4E-01          |                  |  |
| B035DRAFT_00003                                                                                                                                                   | small GTP-binding protein domain                                                            | 89.8    | 93.5    | 88.8                        | 93.2             | 93.6             | 108.1            | 1.08               | 4.1E-01          |                  |  |
| B035DRAFT_00004                                                                                                                                                   | Acetyltransferases                                                                          | 38.5    | 51.4    | 48.5                        | 56.8             | 59.2             | 81.8             | 1.42               | 2.3E-01          |                  |  |
| B035DRAFT_00005                                                                                                                                                   | hypothetical protein( EC:5.3.3.1 )                                                          | 98.5    | 117.4   | 112.0                       | 146.8            | 154.7            | 178.7            | 1.46               | 6.7E-02          |                  |  |
| B035DRAFT_00006                                                                                                                                                   | Helicase conserved C-terminal domain./SNF2 family N-terminal domain./N-6 DNA Methylase.     | 8.5     | 5.2     | 8.8                         | 10.1             | 9.0              | 3.2              | 0.90               | 9.0E-01          |                  |  |
| B035DRAFT_00007                                                                                                                                                   | Domain of unknown function (DUF1896).                                                       | 27.0    | 20.6    | 33.1                        | 37.3             | 30.9             | 11.0             | 0.88               | 8.8E-01          |                  |  |
| B035DRAFT_00008                                                                                                                                                   | Topoisomerase IA( EC:5.99.1.2 )                                                             | 6.0     | 3.5     | 6.6                         | 7.0              | 5.8              | 1.7              | 0.78               | 8.0E-01          |                  |  |
| B035DRAFT_00009                                                                                                                                                   | hypothetical protein                                                                        | 6.6     | 2.3     | 3.2                         | 5.0              | 4.5              | 0.9              | 0.74               | 8.0E-01          |                  |  |
| B035DRAFT_00010                                                                                                                                                   | hypothetical protein                                                                        | 3.6     | 2.2     | 2.5                         | 2.2              | 3.3              | 0.7              | 0.64               | 6.1E-01          |                  |  |
| B035DRAFT_00011                                                                                                                                                   | DNA binding domain, excisionase family                                                      | 13.9    | 5.8     | 10.9                        | 12.9             | 11.9             | 2.0              | 0.71               | 7.8E-01          |                  |  |
| B035DRAFT_00012                                                                                                                                                   | hypothetical protein                                                                        | 12.8    | 8.7     | 13.6                        | 8.1              | 9.9              | 4.0              | 0.60               | 3.7E-01          |                  |  |
| B035DRAFT_00013                                                                                                                                                   | Site-specific recombinase XerD                                                              | 17.6    | 12.3    | 16.2                        | 15.0             | 15.4             | 7.4              | 0.79               | 6.2E-01          |                  |  |
| B035DRAFT_00014                                                                                                                                                   | Alpha-L-fucosidase (GH29)                                                                   | 72.2    | 70.8    | 62.4                        | 90.1             | 74.6             | 46.0             | 0.99               | 9.8E-01          |                  |  |
| B035DRAFT_00015                                                                                                                                                   | Alpha-galactosidase                                                                         | 23.5    | 25.0    | 25.2                        | 20.1             | 24.0             | 18.8             | 0.85               | 2.7E-01          |                  |  |
| B035DRAFT_00016                                                                                                                                                   | Arylsulfatase A and related enzymes                                                         | 42.3    | 42.0    | 47.2                        | 39.6             | 46.2             | 45.1             | 1.00               | 9.7E-01          |                  |  |
| B035DRAFT_00017                                                                                                                                                   | ribonuclease III, bacterial( EC:3.1.26.3 )                                                  | 550.0   | 624.5   | 557.4                       | 402.1            | 541.9            | 491.4            | 0.82               | 3.0E-01          |                  |  |
| B035DRAFT_00018                                                                                                                                                   | beta-ketoacyl-acyl-carrier-protein synthase II( EC:2.3.1.179 )                              | 3374.3  | 3928.0  | 3738.8                      | 2882.0           | 3671.2           | 3990.5           | 0.95               | 7.9E-01          |                  |  |
| B035DRAFT_00019                                                                                                                                                   | acyl carrier protein                                                                        | 4101.2  | 5146.9  | 4656.6                      | 3951.2           | 4823.8           | 5795.6           | 1.04               | 8.8E-01          |                  |  |
| B035DRAFT_00020                                                                                                                                                   | phosphoribosylglycinamide formyltransferase, formyltetrahydrofolate-dependent( EC:2.1.2.2 ) | 75.9    | 90.0    | 87.9                        | 72.6             | 83.0             | 86.8             | 0.95               | 7.4E-01          |                  |  |
| B035DRAFT_00021                                                                                                                                                   | Alpha-L-fucosidase (GH95)                                                                   | 119.7   | 104.1   | 115.7                       | 125.1            | 136.6            | 96.4             | 1.05               | 8.4E-01          |                  |  |
| B035DRAFT_00022                                                                                                                                                   | Alpha-N-acetylglucosaminidase (GH89)                                                        | 58.0    | 51.0    | 50.4                        | 99.6             | 120.1            | 92.5             | 1.95               | 2.7E-02          |                  |  |
| B035DRAFT_00023                                                                                                                                                   | hypothetical protein                                                                        | 53.0    | 49.3    | 49.0                        | 102.5            | 121.3            | 95.8             | 2.10               | 1.4E-02          |                  |  |
| B035DRAFT_00024                                                                                                                                                   | hypothetical protein                                                                        | 57.1    | 55.5    | 57.3                        | 113.4            | 159.5            | 124.0            | 2.31               | 2.2E-02          |                  |  |
| B035DRAFT_00025                                                                                                                                                   | Alpha-galactosidase                                                                         | 40.0    | 33.6    | 35.4                        | 73.4             | 97.4             | 74.7             | 2.24               | 2.6E-02          |                  |  |
| B035DRAFT_00026                                                                                                                                                   | Uncharacterized conserved protein                                                           | 16.0    | 19.6    | 20.6                        | 74.1             | 109.7            | 132.2            | 5.50               | 1.8E-02          |                  |  |
| B035DRAFT_00027                                                                                                                                                   | SusD family                                                                                 | 43.6    | 42.1    | 45.1                        | 312.3            | 428.3            | 459.8            | 9.06               | 1.9E-03          |                  |  |
| <b>B035DRAFT_00028</b>                                                                                                                                            | <b>TonB-linked outer membrane protein, SusC/RagA family</b>                                 | 44.9    | 46.6    | 42.6                        | 271.2            | 378.2            | 456.9            | <b>8.07</b>        | <b>5.3E-03</b>   |                  |  |
| B035DRAFT_00029                                                                                                                                                   | Fe2+-dicitrate sensor, membrane component                                                   | 47.9    | 45.0    | 49.5                        | 349.2            | 448.0            | 414.6            | 8.47               | 4.5E-04          |                  |  |
| B035DRAFT_00030                                                                                                                                                   | RNA polymerase sigma-70 factor, Bacteroides expansion family 1                              | 41.6    | 46.0    | 40.5                        | 47.0             | 42.9             | 48.2             | 1.08               | 4.3E-01          |                  |  |
| B035DRAFT_00031                                                                                                                                                   | Response regulator containing CheY-like receiver domain and AraC-type DNA-binding domain    | 162.7   | 213.2   | 240.4                       | 140.4            | 135.0            | 161.1            | 0.72               | 2.0E-01          |                  |  |
| B035DRAFT_00032                                                                                                                                                   | hypothetical protein                                                                        | 568.4   | 630.4   | 599.1                       | 332.6            | 374.8            | 466.2            | 0.65               | 8.6E-02          |                  |  |
| B035DRAFT_00033                                                                                                                                                   | Protein of unknown function (DUF1703).                                                      | 142.6   | 164.5   | 146.1                       | 152.1            | 169.6            | 177.1            | 1.10               | 4.1E-01          |                  |  |

|                        |                                                                                               |            |            |            |             |             |             |             |                |
|------------------------|-----------------------------------------------------------------------------------------------|------------|------------|------------|-------------|-------------|-------------|-------------|----------------|
| B035DRAFT_00034        | Phosphoglycerate dehydrogenase and related dehydrogenases( EC:1.1.1.290 )                     | 111.6      | 97.5       | 114.2      | 129.9       | 116.7       | 71.6        | 0.96        | 9.1E-01        |
| B035DRAFT_00035        | hypothetical protein                                                                          | 251.4      | 290.3      | 241.8      | 310.5       | 355.5       | 421.8       | 1.38        | 1.6E-01        |
| B035DRAFT_00036        | ADP-heptose:LPS heptosyltransferase (GT9)                                                     | 342.9      | 350.7      | 376.1      | 382.9       | 372.1       | 334.3       | 1.02        | 8.6E-01        |
| B035DRAFT_00037        | Mn2+-dependent serine/threonine protein kinase                                                | 194.4      | 228.0      | 210.2      | 196.1       | 204.0       | 244.2       | 1.02        | 9.3E-01        |
| B035DRAFT_00038        | Lauroyl/myristoyl acyltransferase( EC:2.3.1.)                                                 | 118.1      | 129.6      | 115.4      | 116.6       | 114.6       | 130.5       | 1.00        | 9.7E-01        |
| B035DRAFT_00039        | UDP-galactopyranose mutase( EC:5.4.99.9 )                                                     | 93.7       | 99.2       | 86.9       | 87.8        | 80.4        | 66.5        | 0.83        | 3.0E-01        |
| B035DRAFT_00040        | hypothetical protein                                                                          | 57.8       | 92.8       | 85.8       | 63.2        | 77.1        | 88.5        | 0.98        | 9.5E-01        |
| B035DRAFT_00041        | Glycosyltransferase (GT4)                                                                     | 46.1       | 55.3       | 57.0       | 37.5        | 34.9        | 46.9        | 0.75        | 2.0E-01        |
| B035DRAFT_00042        | hypothetical protein                                                                          | 103.0      | 116.5      | 104.3      | 100.3       | 95.2        | 113.6       | 0.95        | 6.9E-01        |
| B035DRAFT_00043        | Mannosyltransferase OCH1 and related enzymes (GT32)                                           | 96.7       | 102.8      | 101.5      | 86.0        | 91.8        | 105.2       | 0.94        | 5.7E-01        |
| B035DRAFT_00044        | Glycosyltransferases, probably involved in cell wall biogenesis (GT2)                         | 242.0      | 260.6      | 254.5      | 316.1       | 286.6       | 358.0       | 1.26        | 1.3E-01        |
| B035DRAFT_00045        | hypothetical protein                                                                          | 42.2       | 38.6       | 32.9       | 43.9        | 33.9        | 50.2        | 1.12        | 6.6E-01        |
| B035DRAFT_00046        | Nucleoside-diphosphate-sugar epimerases                                                       | 122.5      | 125.8      | 121.5      | 128.2       | 139.7       | 95.5        | 0.97        | 9.0E-01        |
| B035DRAFT_00047        | Predicted membrane protein                                                                    | 113.4      | 124.4      | 120.7      | 103.0       | 115.2       | 115.3       | 0.93        | 3.9E-01        |
| B035DRAFT_00048        | Glycosyltransferases involved in cell wall biogenesis (GT2)                                   | 228.7      | 229.6      | 241.8      | 245.6       | 227.6       | 191.5       | 0.94        | 6.8E-01        |
| B035DRAFT_00049        | 4-amino-4-deoxy-L-arabinose transferase and related glycosyltransferases of PMT family (GT83) | 233.2      | 228.9      | 253.9      | 263.7       | 270.8       | 224.9       | 1.06        | 6.4E-01        |
| B035DRAFT_00050        | 4-alpha-L-fucosyltransferase (Fuc4NAc transferase) (GT56)                                     | 148.1      | 180.1      | 178.7      | 125.3       | 137.3       | 159.3       | 0.83        | 3.1E-01        |
| B035DRAFT_00051        | TDP-4-keto-6-deoxy-D-glucose transaminase                                                     | 273.5      | 301.8      | 283.1      | 237.1       | 253.4       | 249.8       | 0.86        | 8.6E-02        |
| B035DRAFT_00052        | Glycosyltransferases involved in cell wall biogenesis                                         | 73.6       | 82.5       | 75.5       | 78.4        | 75.8        | 87.3        | 1.04        | 6.8E-01        |
| B035DRAFT_00053        | Phosphoglycerol transferase and related proteins, alkaline phosphatase superfamily (GT2)      | 130.4      | 127.8      | 129.3      | 121.1       | 134.5       | 135.1       | 1.01        | 9.2E-01        |
| B035DRAFT_00054        | Predicted double-stranded RNA/RNA-DNA hybrid binding protein( EC:3.1.26.4 )                   | 231.2      | 217.0      | 206.9      | 225.8       | 238.1       | 176.8       | 0.97        | 8.8E-01        |
| B035DRAFT_00055        | arginyl-tRNA synthetase( EC:6.1.1.19 )                                                        | 304.4      | 271.4      | 265.0      | 266.0       | 310.5       | 263.7       | 1.00        | 9.9E-01        |
| B035DRAFT_00056        | Collagenase and related proteases( EC:3.4.)                                                   | 121.2      | 111.3      | 114.5      | 123.2       | 131.0       | 83.2        | 0.95        | 8.7E-01        |
| B035DRAFT_00057        | putative TIM-barrel protein, nifR3 family                                                     | 201.5      | 197.4      | 209.5      | 454.7       | 457.4       | 355.6       | 2.07        | 2.1E-02        |
| B035DRAFT_00058        | Protein of unknown function (DUF2807).                                                        | 432.5      | 357.7      | 395.0      | 1060.9      | 1181.6      | 842.9       | 2.59        | 2.1E-02        |
| B035DRAFT_00059        | PAP2 superfamily                                                                              | 142.3      | 141.1      | 146.3      | 93.1        | 88.8        | 97.0        | 0.65        | 3.3E-03        |
| B035DRAFT_00060        | Nucleoside-diphosphate-sugar epimerases( EC:5.1.3.2 )                                         | 222.7      | 182.8      | 174.4      | 103.6       | 105.4       | 91.0        | 0.52        | 2.7E-02        |
| B035DRAFT_00061        | cation diffusion facilitator family transporter                                               | 442.0      | 359.6      | 377.3      | 218.2       | 206.4       | 153.4       | 0.49        | 4.8E-02        |
| B035DRAFT_00062        | ribonuclease R( EC:3.1.)                                                                      | 416.1      | 367.2      | 367.5      | 397.4       | 369.3       | 356.0       | 0.98        | 8.1E-01        |
| B035DRAFT_00063        | hypothetical protein                                                                          | 62.9       | 70.0       | 62.1       | 55.1        | 53.4        | 50.0        | 0.81        | 8.2E-02        |
| B035DRAFT_00064        | Serine acetyltransferase( EC:2.3.1.30 )                                                       | 83.6       | 82.9       | 83.2       | 93.6        | 92.9        | 99.8        | 1.15        | 4.4E-02        |
| B035DRAFT_00065        | Signal transduction histidine kinase                                                          | 93.9       | 107.3      | 97.6       | 93.4        | 103.3       | 111.0       | 1.03        | 8.2E-01        |
| B035DRAFT_00066        | hypothetical protein                                                                          | 8.7        | 8.4        | 7.0        | 9.1         | 14.4        | 10.5        | 1.39        | 2.6E-01        |
| B035DRAFT_00067        | Signal transduction histidine kinase                                                          | 14.3       | 18.4       | 16.3       | 16.9        | 17.5        | 21.1        | 1.14        | 4.8E-01        |
| B035DRAFT_00068        | Glycoside hydrolase (GH5)                                                                     | 7.1        | 8.4        | 8.0        | 49.8        | 32.8        | 32.1        | 4.78        | 1.3E-02        |
| <b>B035DRAFT_00069</b> | <b>TonB-linked outer membrane protein, SusC/RagA family</b>                                   | <b>7.2</b> | <b>6.3</b> | <b>6.4</b> | <b>34.1</b> | <b>34.0</b> | <b>32.9</b> | <b>5.10</b> | <b>1.2E-04</b> |
| B035DRAFT_00070        | SusD family                                                                                   | 8.0        | 8.0        | 8.2        | 38.5        | 35.4        | 34.6        | 4.47        | 7.0E-05        |
| B035DRAFT_00071        | hypothetical protein                                                                          | 9.2        | 8.7        | 9.9        | 40.7        | 45.4        | 46.7        | 4.78        | 3.8E-04        |
| B035DRAFT_00072        | Arabinogalactan endo-1,4-beta-galactosidase( EC:3.2.1.89 ) (GH53)                             | 28.2       | 25.8       | 26.0       | 83.6        | 89.0        | 78.2        | 3.14        | 6.5E-04        |
| B035DRAFT_00073        | Response regulator containing CheY-like receiver domain and AraC-type DNA-binding domain      | 16.7       | 20.3       | 9.6        | 18.2        | 14.9        | 12.4        | 1.01        | 9.8E-01        |
| B035DRAFT_00074        | hypothetical protein                                                                          | 46.1       | 50.6       | 50.8       | 26.6        | 30.7        | 36.9        | 0.63        | 7.5E-02        |
| B035DRAFT_00075        | hypothetical protein                                                                          | 253.4      | 319.7      | 270.1      | 585.9       | 483.9       | 462.5       | 1.82        | 4.4E-02        |
| B035DRAFT_00076        | hypothetical protein                                                                          | 135.9      | 159.0      | 168.6      | 256.1       | 234.5       | 333.0       | 1.76        | 7.4E-02        |
| B035DRAFT_00077        | Predicted N6-adenine-specific DNA methylase( EC:2.1.1.)                                       | 227.1      | 225.4      | 203.3      | 230.2       | 240.5       | 222.6       | 1.06        | 4.6E-01        |
| B035DRAFT_00078        | Dipeptidyl aminopeptidases/acylaminoacyl-peptidases( EC:3.4.14.5 ) (CE1)                      | 173.8      | 162.9      | 149.3      | 161.9       | 190.4       | 176.2       | 1.09        | 4.7E-01        |

|                 |                                                                                                            |        |        |        |        |        |        |  |      |         |
|-----------------|------------------------------------------------------------------------------------------------------------|--------|--------|--------|--------|--------|--------|--|------|---------|
| B035DRAFT_00079 | phosphoribosylamine-glycine ligase( EC:6.3.4.13 )                                                          | 330.0  | 297.9  | 291.7  | 313.5  | 314.9  | 219.1  |  | 0.91 | 6.8E-01 |
| B035DRAFT_00080 | hypothetical protein                                                                                       | 124.2  | 156.5  | 150.7  | 137.4  | 155.9  | 177.0  |  | 1.09 | 6.4E-01 |
| B035DRAFT_00081 | Predicted membrane protein                                                                                 | 204.3  | 188.8  | 199.8  | 177.4  | 191.1  | 119.7  |  | 0.81 | 4.2E-01 |
| B035DRAFT_00082 | Uncharacterized conserved protein                                                                          | 158.0  | 141.9  | 137.0  | 139.3  | 135.7  | 126.8  |  | 0.92 | 3.8E-01 |
| B035DRAFT_00083 | ABC-type metal ion transport system, periplasmic component/surface adhesin                                 | 90.6   | 87.7   | 86.7   | 93.7   | 93.2   | 100.9  |  | 1.09 | 1.8E-01 |
| B035DRAFT_00084 | ABC-type Mn/Zn transport systems, ATPase component( EC:3.6.3.)                                             | 122.8  | 113.9  | 101.9  | 111.8  | 110.6  | 95.2   |  | 0.94 | 6.4E-01 |
| B035DRAFT_00085 | Beta-glucosidase-related glycosidases( EC:3.2.1.21 ) (GH3)                                                 | 34.3   | 31.5   | 34.2   | 28.4   | 31.2   | 15.2   |  | 0.71 | 4.2E-01 |
| B035DRAFT_00086 | Inorganic pyrophosphatase                                                                                  | 214.6  | 205.1  | 207.1  | 235.5  | 247.7  | 218.0  |  | 1.12 | 1.8E-01 |
| B035DRAFT_00087 | Predicted xylanase/chitin deacetylase (CE4)                                                                | 99.1   | 108.4  | 99.4   | 107.5  | 125.9  | 102.3  |  | 1.09 | 4.9E-01 |
| B035DRAFT_00088 | Arylsulfatase A and related enzymes                                                                        | 67.9   | 64.3   | 61.3   | 66.4   | 82.7   | 73.7   |  | 1.15 | 3.1E-01 |
| B035DRAFT_00089 | Predicted phosphohydrolases                                                                                | 38.9   | 27.9   | 32.9   | 25.6   | 32.7   | 31.2   |  | 0.90 | 6.4E-01 |
| B035DRAFT_00090 | hypothetical protein                                                                                       | 101.5  | 67.8   | 68.5   | 53.2   | 58.6   | 66.2   |  | 0.76 | 3.2E-01 |
| B035DRAFT_00091 | Dehydrogenases with different specificities (related to short-chain alcohol dehydrogenases)( EC:1.1.1.69 ) | 170.2  | 129.6  | 103.2  | 111.2  | 116.3  | 145.3  |  | 0.94 | 8.5E-01 |
| B035DRAFT_00092 | 5-keto 4-deoxyuronate isomerase( EC:5.3.1.17 )                                                             | 20.2   | 24.0   | 26.6   | 25.5   | 24.7   | 17.3   |  | 0.95 | 8.5E-01 |
| B035DRAFT_00093 | D-alanyl-D-alanine carboxypeptidase, serine-type, PBP4 family( EC:3.4.16.4,EC:3.4.21.)                     | 38.7   | 38.2   | 42.7   | 59.9   | 67.7   | 45.4   |  | 1.43 | 1.7E-01 |
| B035DRAFT_00094 | Por secretion system C-terminal sorting domain                                                             | 4.7    | 3.7    | 2.9    | 5.0    | 4.6    | 4.7    |  | 1.29 | 3.5E-01 |
| B035DRAFT_00095 | Pregnancy-associated plasma protein-A.                                                                     | 3.7    | 4.4    | 3.1    | 4.6    | 4.8    | 6.1    |  | 1.38 | 2.3E-01 |
| B035DRAFT_00096 | hypothetical protein                                                                                       | 2.9    | 1.9    | 6.5    | 1.7    | 6.3    | 8.2    |  | 1.36 | 7.9E-01 |
| B035DRAFT_00097 | hypothetical protein                                                                                       | 6.8    | 6.4    | 6.3    | 13.2   | 7.4    | 6.9    |  | 1.35 | 4.3E-01 |
| B035DRAFT_00098 | Predicted P-loop ATPase and inactivated derivatives                                                        | 3.2    | 4.3    | 4.6    | 5.6    | 3.4    | 2.9    |  | 0.96 | 9.3E-01 |
| B035DRAFT_00099 | hypothetical protein                                                                                       | 28.2   | 27.0   | 25.3   | 59.3   | 54.4   | 75.6   |  | 2.33 | 2.2E-02 |
| B035DRAFT_00100 | Large extracellular alpha-helical protein                                                                  | 37.6   | 33.3   | 40.5   | 45.7   | 46.9   | 37.6   |  | 1.17 | 3.6E-01 |
| B035DRAFT_00101 | hypothetical protein                                                                                       | 11.0   | 15.1   | 16.2   | 14.0   | 15.1   | 19.1   |  | 1.14 | 6.2E-01 |
| B035DRAFT_00102 | signal peptidase I, bacterial type( EC:3.4.21.89 )                                                         | 13.0   | 15.6   | 18.4   | 13.3   | 15.1   | 17.1   |  | 0.97 | 9.1E-01 |
| B035DRAFT_00103 | Transglutaminase-like enzymes, putative cysteine proteases                                                 | 17.4   | 13.6   | 18.1   | 17.9   | 15.8   | 15.9   |  | 1.01 | 9.4E-01 |
| B035DRAFT_00104 | dihydroipoamide dehydrogenase( EC:1.8.1.4 )                                                                | 259.1  | 222.0  | 266.6  | 244.3  | 256.9  | 125.4  |  | 0.80 | 6.1E-01 |
| B035DRAFT_00105 | Protein of unknown function (DUF1200).                                                                     | 91.8   | 99.4   | 91.4   | 106.7  | 137.2  | 145.6  |  | 1.37 | 1.5E-01 |
| B035DRAFT_00106 | Protein of unknown function (DUF1200).                                                                     | 107.4  | 112.3  | 98.6   | 128.6  | 142.3  | 149.5  |  | 1.32 | 7.0E-02 |
| B035DRAFT_00107 | L-aspartate oxidase( EC:1.4.3.16 )                                                                         | 196.4  | 188.9  | 196.5  | 209.5  | 235.2  | 189.1  |  | 1.09 | 4.8E-01 |
| B035DRAFT_00108 | Trypsin-like serine proteases, typically periplasmic, contain C-terminal PDZ domain                        | 129.6  | 131.5  | 122.3  | 131.7  | 152.6  | 131.0  |  | 1.08 | 4.3E-01 |
| B035DRAFT_00109 | Histidinol phosphatase and related hydrolases of the PHP family                                            | 13.2   | 13.8   | 9.5    | 9.7    | 14.9   | 10.4   |  | 0.95 | 8.8E-01 |
| B035DRAFT_00110 | Predicted phosphohydrolases                                                                                | 7.4    | 3.9    | 7.2    | 6.3    | 8.1    | 4.7    |  | 1.05 | 9.3E-01 |
| B035DRAFT_00111 | SusD family                                                                                                | 5.0    | 5.7    | 6.1    | 4.3    | 3.8    | 3.9    |  | 0.72 | 6.4E-02 |
| B035DRAFT_00112 | TonB-linked outer membrane protein, SusC/RagA family                                                       | 13.9   | 12.3   | 10.4   | 6.8    | 6.1    | 7.3    |  | 0.55 | 4.4E-02 |
| B035DRAFT_00113 | Rubrythrin                                                                                                 | 4289.3 | 3591.8 | 2762.7 | 1960.7 | 1150.7 | 1732.8 |  | 0.45 | 1.0E-01 |
| B035DRAFT_00114 | high affinity sulphate transporter 1                                                                       | 69.5   | 68.7   | 66.9   | 46.0   | 50.3   | 52.0   |  | 0.72 | 2.1E-02 |
| B035DRAFT_00115 | hypothetical protein                                                                                       | 21.9   | 18.6   | 13.3   | 10.6   | 16.8   | 21.4   |  | 0.89 | 8.1E-01 |
| B035DRAFT_00116 | Outer membrane protein                                                                                     | 15.5   | 15.9   | 14.4   | 9.3    | 11.4   | 12.0   |  | 0.71 | 9.3E-02 |
| B035DRAFT_00117 | ABC-type bacteriocin transporter                                                                           | 13.5   | 14.0   | 13.6   | 10.9   | 12.5   | 13.0   |  | 0.88 | 2.4E-01 |
| B035DRAFT_00118 | Multidrug resistance efflux pump                                                                           | 11.7   | 11.3   | 10.2   | 8.8    | 8.5    | 8.0    |  | 0.77 | 5.5E-02 |
| B035DRAFT_00119 | hypothetical protein                                                                                       | 31.9   | 34.3   | 34.9   | 22.9   | 20.2   | 29.7   |  | 0.71 | 1.7E-01 |
| B035DRAFT_00120 | hypothetical protein                                                                                       | 29.0   | 39.7   | 38.9   | 25.6   | 30.9   | 43.0   |  | 0.91 | 7.9E-01 |
| B035DRAFT_00121 | hypothetical protein                                                                                       | 34.7   | 31.5   | 26.4   | 27.4   | 27.5   | 45.3   |  | 1.06 | 8.8E-01 |
| B035DRAFT_00122 | hypothetical protein                                                                                       | 41.5   | 39.7   | 22.5   | 23.3   | 35.1   | 36.1   |  | 0.93 | 8.8E-01 |
| B035DRAFT_00123 | hypothetical protein                                                                                       | 25.3   | 9.4    | 19.6   | 12.1   | 10.4   | 13.6   |  | 0.72 | 5.5E-01 |
| B035DRAFT_00124 | hypothetical protein                                                                                       | 15.7   | 12.2   | 14.3   | 16.5   | 10.7   | 16.7   |  | 1.02 | 9.5E-01 |
| B035DRAFT_00125 | hypothetical protein                                                                                       | 11.8   | 16.5   | 14.9   | 11.9   | 10.2   | 16.9   |  | 0.89 | 7.3E-01 |

|                 |                                                                                                                         |       |       |       |       |       |       |      |         |
|-----------------|-------------------------------------------------------------------------------------------------------------------------|-------|-------|-------|-------|-------|-------|------|---------|
| B035DRAFT_00126 | hypothetical protein                                                                                                    | 5.0   | 7.3   | 4.6   | 9.2   | 2.3   | 8.0   | 1.00 | 1.0E+00 |
| B035DRAFT_00127 | Signal transduction histidine kinase( EC:2.7.13.3 )                                                                     | 12.3  | 12.6  | 11.6  | 14.0  | 17.2  | 23.7  | 1.47 | 2.2E-01 |
| B035DRAFT_00128 | Response regulators consisting of a CheY-like receiver domain and a winged-helix DNA-binding domain                     | 23.0  | 25.6  | 19.4  | 20.1  | 19.9  | 23.1  | 0.93 | 6.8E-01 |
| B035DRAFT_00129 | Mismatch repair ATPase (MutS family)                                                                                    | 71.0  | 72.4  | 68.9  | 56.5  | 59.1  | 76.3  | 0.90 | 5.2E-01 |
| B035DRAFT_00130 | Fe-S oxidoreductases                                                                                                    | 218.2 | 192.7 | 207.8 | 188.3 | 192.1 | 218.7 | 0.97 | 7.7E-01 |
| B035DRAFT_00131 | hypothetical protein                                                                                                    | 54.7  | 45.8  | 45.5  | 33.0  | 36.3  | 40.2  | 0.75 | 1.3E-01 |
| B035DRAFT_00132 | hypothetical protein                                                                                                    | 70.3  | 103.8 | 84.3  | 89.1  | 88.2  | 113.6 | 1.13 | 6.2E-01 |
| B035DRAFT_00133 | rRNA methylases                                                                                                         | 108.6 | 112.1 | 95.8  | 112.7 | 110.8 | 120.4 | 1.09 | 4.0E-01 |
| B035DRAFT_00134 | quinolinate synthetase complex, A subunit( EC:2.5.1.72 )                                                                | 171.8 | 193.8 | 166.8 | 198.2 | 208.5 | 223.6 | 1.18 | 1.7E-01 |
| B035DRAFT_00135 | hypothetical protein                                                                                                    | 42.6  | 40.8  | 45.1  | 41.3  | 43.6  | 48.3  | 1.04 | 7.3E-01 |
| B035DRAFT_00136 | hypothetical protein                                                                                                    | 13.8  | 43.6  | 30.5  | 25.0  | 27.2  | 33.0  | 1.07 | 9.2E-01 |
| B035DRAFT_00137 | non-canonical purine NTP pyrophosphatase, RdgB/HAM1 family( EC:3.6.1.15 )                                               | 70.8  | 88.1  | 59.7  | 78.5  | 90.2  | 72.0  | 1.11 | 6.6E-01 |
| B035DRAFT_00138 | Predicted transcriptional regulator                                                                                     | 21.6  | 21.0  | 24.6  | 34.7  | 30.7  | 33.6  | 1.48 | 4.0E-02 |
| B035DRAFT_00139 | Antirepressor regulating drug resistance, predicted signal transduction N-terminal membrane component                   | 17.8  | 13.7  | 15.8  | 16.8  | 17.5  | 24.8  | 1.24 | 4.2E-01 |
| B035DRAFT_00140 | hypothetical protein                                                                                                    | 13.7  | 10.8  | 9.5   | 10.2  | 9.3   | 14.2  | 0.99 | 9.7E-01 |
| B035DRAFT_00141 | hypothetical protein                                                                                                    | 21.4  | 23.1  | 17.9  | 15.8  | 15.4  | 23.0  | 0.86 | 5.7E-01 |
| B035DRAFT_00142 | hypothetical protein                                                                                                    | 25.6  | 32.7  | 15.6  | 25.6  | 19.7  | 30.2  | 1.05 | 9.2E-01 |
| B035DRAFT_00143 | hypothetical protein                                                                                                    | 74.1  | 77.0  | 75.3  | 94.0  | 103.6 | 88.3  | 1.26 | 6.8E-02 |
| B035DRAFT_00144 | Uncharacterized conserved protein                                                                                       | 182.5 | 180.6 | 160.6 | 162.8 | 190.7 | 232.8 | 1.11 | 6.1E-01 |
| B035DRAFT_00145 | leucyl-tRNA synthetase, eubacterial and mitochondrial family( EC:6.1.1.4 )                                              | 241.3 | 218.3 | 210.0 | 209.3 | 251.2 | 239.7 | 1.04 | 7.3E-01 |
| B035DRAFT_00146 | hypothetical protein                                                                                                    | 33.8  | 29.3  | 34.4  | 31.2  | 32.9  | 44.6  | 1.10 | 6.6E-01 |
| B035DRAFT_00147 | Uncharacterized protein related to the periplasmic component of the Tol biopolymer transport system( EC:3.4.21 ) (PL22) | 41.7  | 39.7  | 41.9  | 45.8  | 54.6  | 52.4  | 1.24 | 1.1E-01 |
| B035DRAFT_00148 | Arylsulfatase A and related enzymes                                                                                     | 127.8 | 129.4 | 121.6 | 128.6 | 150.6 | 155.0 | 1.14 | 2.6E-01 |
| B035DRAFT_00149 | ATPase components of ABC transporters with duplicated ATPase domains                                                    | 29.5  | 25.6  | 28.1  | 23.7  | 35.7  | 27.9  | 1.04 | 8.9E-01 |
| B035DRAFT_00150 | hypothetical protein                                                                                                    | 94.3  | 99.7  | 104.0 | 129.8 | 128.8 | 158.7 | 1.39 | 7.7E-02 |
| B035DRAFT_00151 | Outer membrane receptor for ferrienterochelin and colicins                                                              | 117.9 | 129.9 | 135.7 | 134.0 | 145.6 | 178.9 | 1.19 | 3.3E-01 |
| B035DRAFT_00152 | hypothetical protein                                                                                                    | 34.4  | 47.3  | 48.0  | 43.5  | 32.3  | 52.3  | 0.98 | 9.6E-01 |
| B035DRAFT_00153 | hypothetical protein                                                                                                    | 51.0  | 65.9  | 57.8  | 59.3  | 61.4  | 79.6  | 1.14 | 5.3E-01 |
| B035DRAFT_00154 | succinate CoA transferases                                                                                              | 149.3 | 167.6 | 161.4 | 168.2 | 179.3 | 218.0 | 1.18 | 3.2E-01 |
| B035DRAFT_00155 | hypothetical protein                                                                                                    | 69.8  | 94.0  | 69.7  | 104.4 | 134.8 | 177.1 | 1.76 | 1.5E-01 |
| B035DRAFT_00156 | hypothetical protein                                                                                                    | 24.6  | 32.1  | 32.4  | 29.1  | 32.5  | 42.8  | 1.17 | 5.6E-01 |
| B035DRAFT_00157 | tRNA-N(6)-(isopentenyl)adenosine-37 thiotransferase enzyme MiaB                                                         | 336.4 | 302.1 | 282.8 | 258.1 | 321.7 | 291.6 | 0.94 | 7.0E-01 |
| B035DRAFT_00158 | FKBP-type peptidyl-prolyl cis-trans isomerases 1( EC:5.2.1.8 )                                                          | 205.9 | 203.7 | 214.8 | 197.7 | 218.6 | 231.0 | 1.04 | 7.0E-01 |
| B035DRAFT_00159 | Putative stress-responsive transcriptional regulator                                                                    | 285.1 | 269.3 | 288.8 | 330.9 | 310.1 | 315.5 | 1.13 | 8.2E-02 |
| B035DRAFT_00160 | Methyltransferase domain.                                                                                               | 410.0 | 340.6 | 386.8 | 357.4 | 364.6 | 235.2 | 0.83 | 5.0E-01 |
| B035DRAFT_00161 | Cell division protein                                                                                                   | 263.7 | 265.0 | 256.1 | 251.8 | 279.3 | 294.0 | 1.05 | 5.7E-01 |
| B035DRAFT_00162 | Protein of unknown function (DUF3098).                                                                                  | 215.8 | 219.0 | 186.2 | 179.3 | 244.7 | 269.6 | 1.10 | 6.9E-01 |
| B035DRAFT_00163 | Uncharacterized bacitracin resistance protein( EC:3.6.1.27 )                                                            | 332.2 | 316.5 | 304.2 | 293.5 | 357.5 | 332.3 | 1.03 | 8.1E-01 |
| B035DRAFT_00164 | tRNA pseudouridine 55 synthase( EC:5.4.99.25 )                                                                          | 378.8 | 341.8 | 340.5 | 332.2 | 379.7 | 280.3 | 0.93 | 6.7E-01 |
| B035DRAFT_00165 | S-adenosylmethionine:tRNA ribosyltransferase-isomerase( EC:5.)                                                          | 446.0 | 437.0 | 427.8 | 454.7 | 477.7 | 469.1 | 1.07 | 1.2E-01 |
| B035DRAFT_00166 | 2-amino-4-hydroxy-6-hydroxymethylidihydropteridine pyrophosphokinase( EC:2.7.6.3 )                                      | 165.2 | 187.4 | 181.8 | 165.0 | 177.1 | 211.1 | 1.03 | 8.5E-01 |
| B035DRAFT_00167 | Uncharacterized protein conserved in bacteria                                                                           | 81.9  | 90.0  | 99.6  | 95.5  | 95.4  | 98.3  | 1.07 | 5.2E-01 |
| B035DRAFT_00168 | Metal-dependent hydrolase                                                                                               | 77.6  | 75.1  | 82.1  | 79.7  | 92.2  | 96.4  | 1.14 | 2.9E-01 |
| B035DRAFT_00169 | drug resistance transporter, EmrB/QacA subfamily                                                                        | 161.8 | 149.8 | 177.1 | 141.1 | 96.0  | 78.8  | 0.63 | 2.0E-01 |
| B035DRAFT_00171 | S-adenosylmethionine synthetase( EC:2.5.1.6 )                                                                           | 878.7 | 869.0 | 870.7 | 963.4 | 909.3 | 725.0 | 0.98 | 9.3E-01 |
| B035DRAFT_00172 | TIGR00730 family protein                                                                                                | 326.9 | 327.9 | 310.1 | 261.9 | 304.4 | 215.9 | 0.80 | 2.7E-01 |

|                 |                                                                                                     |        |        |        |       |       |        |  |      |         |
|-----------------|-----------------------------------------------------------------------------------------------------|--------|--------|--------|-------|-------|--------|--|------|---------|
| B035DRAFT_00173 | hypothetical protein                                                                                | 281.5  | 302.9  | 299.4  | 241.0 | 272.5 | 271.0  |  | 0.89 | 2.0E-01 |
| B035DRAFT_00174 | Uroporphyrinogen-III synthase( EC:4.2.1.75 )                                                        | 1095.3 | 1255.9 | 1202.4 | 903.8 | 838.5 | 1034.1 |  | 0.78 | 1.3E-01 |
| B035DRAFT_00175 | ribonuclease P protein component, eubacterial( EC:3.1.26.5 )                                        | 431.4  | 408.8  | 394.2  | 407.2 | 427.6 | 295.6  |  | 0.90 | 6.4E-01 |
| B035DRAFT_00176 | conserved hypothetical protein YidD                                                                 | 253.4  | 250.3  | 287.0  | 265.9 | 289.7 | 291.1  |  | 1.07 | 4.7E-01 |
| B035DRAFT_00177 | Mg-dependent DNase( EC:3.1.21.)                                                                     | 225.2  | 201.7  | 250.3  | 224.7 | 238.7 | 128.4  |  | 0.85 | 6.6E-01 |
| B035DRAFT_00178 | tyrosyl-tRNA synthetase( EC:6.1.1.1 )                                                               | 624.0  | 656.1  | 657.5  | 558.4 | 640.0 | 517.3  |  | 0.88 | 3.1E-01 |
| B035DRAFT_00179 | Periplasmic protease (PL22)                                                                         | 54.6   | 53.4   | 55.3   | 45.4  | 54.7  | 44.4   |  | 0.88 | 3.2E-01 |
| B035DRAFT_00180 | ( tRNA )                                                                                            | 105.0  | 130.0  | 100.0  | 93.7  | 97.3  | 62.2   |  | 0.75 | 3.4E-01 |
| B035DRAFT_00181 | hypothetical protein                                                                                | 388.1  | 386.2  | 380.7  | 408.4 | 374.8 | 303.8  |  | 0.93 | 6.7E-01 |
| B035DRAFT_00182 | hypothetical protein                                                                                | 28.5   | 38.6   | 32.6   | 30.0  | 34.7  | 37.6   |  | 1.03 | 8.9E-01 |
| B035DRAFT_00183 | ABC-type bacteriocin/lantibiotic exporters, contain an N-terminal double-glycine peptidase domain   | 11.7   | 12.7   | 15.4   | 10.6  | 9.4   | 9.3    |  | 0.74 | 1.5E-01 |
| B035DRAFT_00184 | hypothetical protein                                                                                | 10.6   | 10.8   | 12.5   | 6.9   | 7.2   | 7.4    |  | 0.64 | 2.4E-02 |
| B035DRAFT_00185 | His Kinase A (phosphoacceptor) domain./Histidine kinase-, DNA gyrase B-, and HSP90-like ATPase.     | 51.9   | 54.7   | 53.2   | 56.3  | 54.8  | 46.8   |  | 0.99 | 9.0E-01 |
| B035DRAFT_00186 | Response regulators consisting of a CheY-like receiver domain and a winged-helix DNA-binding domain | 67.1   | 61.5   | 60.2   | 45.9  | 58.1  | 32.0   |  | 0.70 | 3.0E-01 |
| B035DRAFT_00187 | Conserved protein/domain typically associated with flavoprotein oxygenases, DIM6/NTAB family        | 87.9   | 89.6   | 73.7   | 74.2  | 78.8  | 82.3   |  | 0.94 | 6.2E-01 |
| B035DRAFT_00188 | DNA mismatch repair protein MutS                                                                    | 140.4  | 131.4  | 128.4  | 119.3 | 132.2 | 91.6   |  | 0.85 | 4.2E-01 |
| B035DRAFT_00189 | N-acetyl-beta-hexosaminidase( EC:3.2.1.52 ) (GH20)                                                  | 96.2   | 87.3   | 89.6   | 80.3  | 96.3  | 70.8   |  | 0.90 | 5.3E-01 |
| B035DRAFT_00190 | hypothetical protein                                                                                | 62.8   | 70.0   | 63.8   | 50.3  | 57.8  | 82.0   |  | 0.95 | 8.5E-01 |
| B035DRAFT_00191 | hypothetical protein                                                                                | 206.5  | 205.9  | 197.7  | 321.5 | 344.6 | 233.1  |  | 1.45 | 1.6E-01 |
| B035DRAFT_00192 | Protein of unknown function (DUF1703)./Predicted AAA-ATPase.                                        | 159.6  | 158.9  | 164.4  | 183.6 | 181.4 | 190.1  |  | 1.15 | 2.3E-02 |
| B035DRAFT_00193 | Chloramphenicol O-acetyltransferase( EC:2.3.1.28 )                                                  | 55.5   | 52.3   | 60.1   | 58.2  | 64.3  | 64.7   |  | 1.12 | 2.9E-01 |
| B035DRAFT_00194 | prolipoprotein diacylglycerol transferase                                                           | 64.1   | 56.7   | 59.6   | 62.5  | 70.1  | 68.2   |  | 1.11 | 2.7E-01 |
| B035DRAFT_00195 | 2-dehydropanoate 2-reductase( EC:1.1.1.169 )                                                        | 78.1   | 59.1   | 69.2   | 64.1  | 71.7  | 61.8   |  | 0.96 | 8.3E-01 |
| B035DRAFT_00196 | GTP-binding protein YchF                                                                            | 200.0  | 200.3  | 173.0  | 176.7 | 189.7 | 132.7  |  | 0.86 | 5.0E-01 |
| B035DRAFT_00197 | hypothetical protein                                                                                | 90.4   | 94.4   | 106.8  | 131.9 | 112.0 | 141.2  |  | 1.32 | 1.5E-01 |
| B035DRAFT_00198 | DNA polymerase I( EC:2.7.7.7 )                                                                      | 58.4   | 58.3   | 53.4   | 80.9  | 98.3  | 95.0   |  | 1.61 | 3.0E-02 |
| B035DRAFT_00199 | Geranylgeranyl pyrophosphate synthase( EC:2.5.1.90 )                                                | 265.4  | 300.9  | 278.3  | 259.4 | 246.1 | 250.0  |  | 0.90 | 1.8E-01 |
| B035DRAFT_00200 | deoxyribose-phosphate aldolase( EC:4.1.2.4 )                                                        | 298.6  | 303.7  | 292.2  | 289.4 | 294.6 | 345.7  |  | 1.04 | 7.4E-01 |
| B035DRAFT_00201 | Predicted pyrophosphatase                                                                           | 86.8   | 88.1   | 93.5   | 98.6  | 95.4  | 89.4   |  | 1.06 | 4.2E-01 |
| B035DRAFT_00202 | D-tyrosyl-tRNA(Tyr) deacylase( EC:3.1.)                                                             | 67.5   | 65.0   | 62.2   | 71.1  | 84.2  | 81.7   |  | 1.21 | 1.3E-01 |
| B035DRAFT_00203 | excinuclease ABC, C subunit                                                                         | 23.5   | 29.2   | 27.8   | 25.4  | 26.9  | 28.0   |  | 1.00 | 9.9E-01 |
| B035DRAFT_00204 | adenine phosphoribosyltransferase( EC:2.4.2.7 )                                                     | 166.0  | 158.2  | 136.3  | 161.9 | 175.9 | 157.9  |  | 1.08 | 5.3E-01 |
| B035DRAFT_00205 | glucose-inhibited division protein A                                                                | 115.1  | 101.0  | 101.8  | 114.0 | 118.0 | 97.5   |  | 1.04 | 8.0E-01 |
| B035DRAFT_00206 | metalloprotein, YbeY/UPF0054 family                                                                 | 57.9   | 74.9   | 64.6   | 55.9  | 54.0  | 49.3   |  | 0.81 | 2.1E-01 |
| B035DRAFT_00207 | Uncharacterized membrane protein, required for spore maturation in B. subtilis.                     | 41.1   | 48.1   | 54.2   | 44.9  | 43.8  | 49.7   |  | 0.97 | 8.6E-01 |
| B035DRAFT_00208 | hypothetical protein                                                                                | 24.7   | 29.8   | 21.8   | 17.1  | 29.4  | 28.7   |  | 0.96 | 9.3E-01 |
| B035DRAFT_00209 | hypothetical protein                                                                                | 144.5  | 141.3  | 133.8  | 124.9 | 111.8 | 125.6  |  | 0.86 | 1.4E-01 |
| B035DRAFT_00210 | Uncharacterized protein conserved in bacteria                                                       | 128.3  | 106.3  | 107.9  | 115.2 | 110.3 | 101.0  |  | 0.96 | 7.3E-01 |
| B035DRAFT_00211 | Bacterial regulatory proteins, luxR family                                                          | 21.3   | 19.5   | 21.9   | 25.6  | 23.5  | 20.9   |  | 1.11 | 3.9E-01 |
| B035DRAFT_00212 | hypothetical protein                                                                                | 7.6    | 7.4    | 9.4    | 9.7   | 7.6   | 8.7    |  | 1.07 | 7.3E-01 |
| B035DRAFT_00213 | Site-specific recombinase XerD                                                                      | 239.4  | 177.3  | 206.7  | 186.7 | 156.4 | 188.6  |  | 0.86 | 4.2E-01 |
| B035DRAFT_00214 | Pyruvate kinase                                                                                     | 28.1   | 26.9   | 26.0   | 21.4  | 17.2  | 26.3   |  | 0.79 | 3.2E-01 |
| B035DRAFT_00215 | Predicted ATPase                                                                                    | 8.6    | 8.6    | 8.1    | 5.2   | 4.7   | 7.2    |  | 0.66 | 1.5E-01 |
| B035DRAFT_00216 | hypothetical protein                                                                                | 75.0   | 74.0   | 70.5   | 36.0  | 46.2  | 53.6   |  | 0.61 | 8.6E-02 |
| B035DRAFT_00217 | Response regulator containing CheY-like receiver domain and AraC-type DNA-binding domain            | 12.7   | 14.8   | 15.4   | 8.4   | 7.0   | 14.6   |  | 0.67 | 3.5E-01 |

|                 |                                                                                                                |        |        |        |        |        |        |      |         |
|-----------------|----------------------------------------------------------------------------------------------------------------|--------|--------|--------|--------|--------|--------|------|---------|
| B035DRAFT_00218 | Protein of unknown function (DUF1703).                                                                         | 69.2   | 73.2   | 53.3   | 69.0   | 80.5   | 66.1   | 1.11 | 6.2E-01 |
| B035DRAFT_00219 | Predicted AAA-ATPase.                                                                                          | 49.7   | 47.9   | 46.4   | 51.3   | 53.0   | 61.5   | 1.15 | 2.4E-01 |
| B035DRAFT_00220 | Response regulator containing CheY-like receiver domain and AraC-type DNA-binding domain                       | 20.0   | 28.8   | 29.3   | 24.8   | 18.6   | 19.8   | 0.82 | 4.6E-01 |
| B035DRAFT_00221 | hypothetical protein                                                                                           | 60.2   | 66.0   | 61.0   | 41.6   | 48.7   | 54.7   | 0.77 | 1.6E-01 |
| B035DRAFT_00222 | hypothetical protein                                                                                           | 0.0    | 9.1    | 0.0    | 1.6    | 1.4    | 1.4    | 0.16 |         |
| B035DRAFT_00223 | K <sup>+</sup> -dependent Na <sup>+</sup> /Ca <sup>+</sup> exchanger related-protein                           | 46.0   | 47.9   | 46.7   | 37.1   | 50.4   | 39.4   | 0.89 | 5.1E-01 |
| B035DRAFT_00224 | hypothetical protein                                                                                           | 518.7  | 556.3  | 512.2  | 471.2  | 495.2  | 553.6  | 0.96 | 6.5E-01 |
| B035DRAFT_00225 | Type IIA topoisomerase (DNA gyrase/topo II, topoisomerase IV), B subunit( EC:5.99.1.)                          | 311.0  | 305.5  | 291.5  | 255.1  | 311.6  | 250.6  | 0.90 | 4.1E-01 |
| B035DRAFT_00226 | pantetheine-phosphate adenyltransferase, bacterial( EC:2.7.7.3 )                                               | 373.0  | 358.7  | 330.0  | 291.6  | 320.5  | 236.2  | 0.79 | 2.3E-01 |
| B035DRAFT_00227 | C-terminal peptidase (prc)( EC:3.4.21.102 )                                                                    | 231.9  | 199.9  | 209.0  | 162.2  | 177.7  | 118.5  | 0.71 | 2.0E-01 |
| B035DRAFT_00228 | Membrane-associated phospholipid phosphatase                                                                   | 88.4   | 90.4   | 82.1   | 80.0   | 71.6   | 66.0   | 0.83 | 1.7E-01 |
| B035DRAFT_00229 | succinate dehydrogenase (or fumarate reductase) cytochrome b subunit, b558 family                              | 505.8  | 503.6  | 508.1  | 378.2  | 460.5  | 467.9  | 0.86 | 2.5E-01 |
| B035DRAFT_00230 | succinate dehydrogenase or fumarate reductase, flavoprotein subunit, Bacillus subtilis subgroup( EC:1.3.99.1 ) | 1017.0 | 950.9  | 1004.7 | 928.4  | 1127.9 | 1037.4 | 1.04 | 7.4E-01 |
| B035DRAFT_00231 | Succinate dehydrogenase/fumarate reductase, Fe-S protein subunit( EC:1.3.99.1 )                                | 1251.5 | 1363.4 | 1434.8 | 1350.2 | 1550.3 | 1659.5 | 1.12 | 3.9E-01 |
| B035DRAFT_00232 | AraC-type DNA-binding domain-containing proteins                                                               | 23.5   | 20.5   | 20.2   | 21.4   | 26.8   | 32.2   | 1.24 | 3.7E-01 |
| B035DRAFT_00233 | hypothetical protein                                                                                           | 9.4    | 7.4    | 5.9    | 5.8    | 8.2    | 10.5   | 1.07 | 8.8E-01 |
| B035DRAFT_00234 | hypothetical protein                                                                                           | 2.5    | 2.8    | 2.5    | 2.0    | 3.5    | 1.2    | 0.79 | 6.7E-01 |
| B035DRAFT_00235 | Protein of unknown function (DUF3575).                                                                         | 3.5    | 3.4    | 3.9    | 4.0    | 4.4    | 3.9    | 1.13 | 2.6E-01 |
| B035DRAFT_00236 | TonB-linked outer membrane protein, SusC/RagA family                                                           | 70.8   | 75.7   | 76.4   | 55.3   | 61.2   | 68.3   | 0.83 | 1.7E-01 |
| B035DRAFT_00237 | SusD family                                                                                                    | 50.2   | 55.5   | 58.3   | 30.3   | 33.8   | 39.2   | 0.63 | 5.5E-02 |
| B035DRAFT_00238 | Alpha-L-fucosidase( EC:3.2.1.51 ) (GH29)                                                                       | 92.2   | 92.3   | 84.2   | 67.3   | 90.7   | 76.4   | 0.87 | 4.0E-01 |
| B035DRAFT_00239 | DNA protecting protein DprA                                                                                    | 101.3  | 105.4  | 107.9  | 95.0   | 105.9  | 93.4   | 0.93 | 4.0E-01 |
| B035DRAFT_00240 | Predicted thioesterase( EC:3.1.2.)                                                                             | 71.9   | 83.6   | 83.0   | 103.8  | 99.5   | 92.3   | 1.24 | 1.2E-01 |
| B035DRAFT_00241 | tRNA-dihydrouridine synthase                                                                                   | 60.3   | 59.2   | 68.3   | 81.9   | 77.5   | 64.0   | 1.19 | 3.1E-01 |
| B035DRAFT_00242 | lactaldehyde reductase( EC:1.1.1.77 )                                                                          | 111.3  | 125.1  | 119.1  | 137.8  | 144.4  | 147.9  | 1.21 | 6.8E-02 |
| B035DRAFT_00243 | Protein of unknown function (DUF2851).                                                                         | 32.8   | 40.5   | 32.1   | 43.1   | 43.2   | 49.7   | 1.29 | 1.7E-01 |
| B035DRAFT_00244 | dihydrodipicolinate reductase( EC:1.3.1.26 )                                                                   | 180.1  | 156.1  | 175.9  | 219.9  | 238.0  | 158.6  | 1.19 | 4.7E-01 |
| B035DRAFT_00245 | hypothetical protein( EC:3.4.21.89 )                                                                           | 247.0  | 228.5  | 259.4  | 259.6  | 272.9  | 238.8  | 1.05 | 6.2E-01 |
| B035DRAFT_00246 | signal peptidase I, bacterial type( EC:3.4.21.89 )                                                             | 228.2  | 239.3  | 247.4  | 268.2  | 245.3  | 214.6  | 1.01 | 9.2E-01 |
| B035DRAFT_00247 | WbqC-like protein family                                                                                       | 131.6  | 132.4  | 143.4  | 114.5  | 132.7  | 140.8  | 0.95 | 6.7E-01 |
| B035DRAFT_00248 | Dehydrogenases with different specificities (related to short-chain alcohol dehydrogenases)                    | 161.4  | 144.2  | 143.4  | 118.3  | 140.9  | 93.5   | 0.78 | 2.9E-01 |
| B035DRAFT_00249 | mannonate dehydratase( EC:4.2.1.8 )                                                                            | 148.3  | 123.1  | 122.4  | 108.0  | 118.4  | 80.5   | 0.77 | 3.1E-01 |
| B035DRAFT_00250 | hypothetical protein                                                                                           | 92.0   | 86.2   | 101.9  | 117.1  | 98.4   | 69.9   | 1.00 | 1.0E+00 |
| B035DRAFT_00251 | Trehalose and maltose hydrolases (possible phosphorylases) (GH95)                                              | 63.0   | 59.7   | 56.2   | 68.8   | 77.2   | 61.9   | 1.16 | 2.9E-01 |
| B035DRAFT_00252 | Predicted Zn-dependent peptidases                                                                              | 19.1   | 28.6   | 23.2   | 28.3   | 21.9   | 28.8   | 1.12 | 6.7E-01 |
| B035DRAFT_00253 | TIGR00730 family protein                                                                                       | 151.2  | 116.2  | 113.6  | 122.2  | 142.2  | 78.2   | 0.88 | 7.3E-01 |
| B035DRAFT_00254 | Predicted sugar phosphate isomerase involved in capsule formation( EC:5.3.1.13 )                               | 344.0  | 326.0  | 348.7  | 317.3  | 290.5  | 273.7  | 0.86 | 1.6E-01 |
| B035DRAFT_00255 | Chitinase( EC:3.2.1.14 ) (GH18)                                                                                | 520.6  | 445.5  | 560.4  | 402.9  | 353.5  | 265.2  | 0.66 | 1.7E-01 |
| B035DRAFT_00256 | Aminopeptidase N( EC:3.4.11.2 )                                                                                | 120.5  | 107.5  | 115.2  | 89.9   | 95.8   | 94.9   | 0.82 | 6.0E-02 |
| B035DRAFT_00257 | tRNA (5-methylaminomethyl-2-thiouridylate)-methyltransferase( EC:2.8.1.)                                       | 52.7   | 59.7   | 50.7   | 61.0   | 73.4   | 75.1   | 1.28 | 1.6E-01 |
| B035DRAFT_00258 | hypothetical protein                                                                                           | 81.2   | 79.2   | 67.2   | 108.2  | 116.3  | 107.9  | 1.47 | 4.4E-02 |
| B035DRAFT_00259 | AraC-type DNA-binding domain-containing proteins                                                               | 50.3   | 69.1   | 62.5   | 21.9   | 25.2   | 37.1   | 0.45 | 8.3E-02 |
| B035DRAFT_00260 | hypothetical protein                                                                                           | 1186.7 | 1203.7 | 1119.7 | 128.6  | 198.1  | 246.0  | 0.16 | 1.6E-02 |
| B035DRAFT_00261 | hypothetical protein                                                                                           | 17.3   | 15.5   | 15.3   | 16.8   | 19.8   | 18.7   | 1.15 | 2.5E-01 |

|                 |                                                                                         |       |       |       |       |       |       |      |         |
|-----------------|-----------------------------------------------------------------------------------------|-------|-------|-------|-------|-------|-------|------|---------|
| B035DRAFT_00262 | hypothetical protein                                                                    | 0.0   | 0.0   | 0.0   | 0.0   | 0.0   | 0.0   | 0.00 |         |
| B035DRAFT_00263 | hypothetical protein                                                                    | 17.6  | 19.2  | 16.4  | 19.4  | 18.9  | 21.9  | 1.13 | 3.1E-01 |
| B035DRAFT_00264 | hypothetical protein                                                                    | 5.0   | 7.6   | 4.1   | 4.4   | 5.3   | 8.3   | 1.07 | 8.9E-01 |
| B035DRAFT_00265 | Predicted nucleotidyltransferases                                                       | 14.1  | 16.4  | 21.9  | 38.5  | 47.0  | 49.1  | 2.60 | 3.9E-02 |
| B035DRAFT_00266 | hypothetical protein                                                                    | 2.0   | 6.5   | 3.1   | 3.8   | 1.4   | 3.3   | 0.74 | 7.3E-01 |
| B035DRAFT_00267 | hypothetical protein                                                                    | 5.3   | 3.0   | 2.1   | 3.6   | 2.4   | 4.4   | 1.06 | 9.3E-01 |
| B035DRAFT_00268 | hypothetical protein                                                                    | 11.7  | 12.3  | 8.6   | 18.5  | 14.9  | 29.9  | 1.88 | 1.9E-01 |
| B035DRAFT_00269 | Aspartyl aminopeptidase( EC:3.4.11.21 )                                                 | 16.5  | 13.4  | 14.0  | 10.1  | 7.1   | 12.0  | 0.65 | 2.1E-01 |
| B035DRAFT_00270 | hypothetical protein                                                                    | 49.3  | 68.2  | 51.4  | 49.4  | 47.9  | 59.7  | 0.94 | 7.7E-01 |
| B035DRAFT_00271 | hypothetical protein                                                                    | 94.9  | 99.0  | 83.8  | 192.0 | 207.5 | 248.7 | 2.33 | 1.7E-02 |
| B035DRAFT_00272 | Beta-galactosidase/beta-glucuronidase( EC:3.2.1.23 ) (GH2)                              | 509.3 | 494.5 | 492.2 | 435.4 | 568.1 | 607.3 | 1.07 | 7.4E-01 |
| B035DRAFT_00273 | hypothetical protein                                                                    | 50.6  | 55.5  | 51.8  | 53.4  | 57.1  | 59.8  | 1.08 | 3.4E-01 |
| B035DRAFT_00274 | Peroxiredoxin                                                                           | 53.9  | 50.1  | 51.0  | 47.0  | 47.5  | 38.1  | 0.85 | 2.7E-01 |
| B035DRAFT_00275 | Arabinose efflux permease                                                               | 70.5  | 58.4  | 70.6  | 47.6  | 44.0  | 45.3  | 0.69 | 5.1E-02 |
| B035DRAFT_00276 | Protein of unknown function (DUF2721).                                                  | 118.7 | 104.7 | 113.3 | 78.9  | 64.8  | 84.6  | 0.67 | 7.8E-02 |
| B035DRAFT_00277 | hypothetical protein                                                                    | 349.1 | 330.0 | 367.5 | 249.4 | 212.9 | 263.9 | 0.69 | 6.1E-02 |
| B035DRAFT_00278 | Lactate dehydrogenase and related dehydrogenases( EC:1.1.1.28 )                         | 711.9 | 636.9 | 693.0 | 637.3 | 510.4 | 499.8 | 0.80 | 2.0E-01 |
| B035DRAFT_00279 | MAF protein                                                                             | 131.2 | 133.9 | 136.0 | 101.1 | 133.4 | 143.5 | 0.93 | 7.2E-01 |
| B035DRAFT_00280 | 3-deoxy-D-manno-octulosonate 8-phosphate phosphatase, YrbI family( EC:3.1.3.45 )        | 127.9 | 122.2 | 110.9 | 102.4 | 115.1 | 111.8 | 0.91 | 3.7E-01 |
| B035DRAFT_00281 | NADP oxidoreductase coenzyme F420-dependent./Domain of unknown function (DUF2520).      | 101.7 | 92.6  | 99.1  | 82.0  | 100.3 | 87.9  | 0.92 | 4.7E-01 |
| B035DRAFT_00282 | hypothetical protein                                                                    | 99.1  | 112.1 | 92.6  | 91.7  | 125.7 | 131.7 | 1.14 | 5.7E-01 |
| B035DRAFT_00283 | Nitroreductase                                                                          | 94.1  | 88.1  | 74.3  | 87.4  | 104.4 | 67.8  | 1.00 | 1.0E+00 |
| B035DRAFT_00284 | hypothetical protein                                                                    | 46.1  | 42.6  | 41.1  | 46.9  | 45.1  | 58.4  | 1.15 | 3.8E-01 |
| B035DRAFT_00285 | methyilmalonyl-CoA epimerase( EC:4.4.1.5 )                                              | 293.8 | 337.7 | 314.8 | 263.3 | 335.1 | 334.9 | 0.98 | 9.2E-01 |
| B035DRAFT_00286 | Acetyl-CoA carboxylase, carboxyltransferase component (subunits alpha and beta)         | 603.2 | 604.8 | 633.2 | 522.4 | 614.3 | 638.8 | 0.96 | 7.4E-01 |
| B035DRAFT_00287 | Oxaloacetate decarboxylase, gamma chain.                                                | 511.7 | 497.7 | 499.7 | 398.3 | 534.8 | 568.9 | 0.98 | 9.4E-01 |
| B035DRAFT_00288 | Acetylpropionyl-CoA carboxylase, alpha subunit                                          | 537.3 | 585.0 | 550.5 | 455.7 | 630.9 | 726.0 | 1.06 | 8.2E-01 |
| B035DRAFT_00289 | sodium ion-translocating decarboxylase, beta subunit( EC:4.1.1.3 )                      | 530.5 | 549.9 | 594.0 | 484.3 | 588.6 | 685.8 | 1.04 | 8.5E-01 |
| B035DRAFT_00290 | Cyclo-malto-dextrinase C-terminal domain.                                               | 293.8 | 304.4 | 244.4 | 492.8 | 482.8 | 453.2 | 1.70 | 2.8E-02 |
| B035DRAFT_00291 | Short-chain alcohol dehydrogenase of unknown specificity                                | 127.8 | 128.8 | 129.7 | 115.5 | 127.9 | 88.2  | 0.85 | 4.2E-01 |
| B035DRAFT_00292 | Predicted esterase (CE1)                                                                | 56.1  | 53.7  | 51.8  | 63.4  | 60.9  | 38.3  | 0.98 | 9.6E-01 |
| B035DRAFT_00293 | Fe2+/Zn2+ uptake regulation proteins                                                    | 64.1  | 57.3  | 66.6  | 56.4  | 54.9  | 68.2  | 0.95 | 7.5E-01 |
| B035DRAFT_00294 | MazG family protein( EC:3.6.1.19 )                                                      | 151.1 | 126.4 | 117.7 | 89.1  | 130.5 | 66.6  | 0.70 | 3.6E-01 |
| B035DRAFT_00295 | Response regulator containing a CheY-like receiver domain and an HTH DNA-binding domain | 58.5  | 61.6  | 56.6  | 47.1  | 57.3  | 48.8  | 0.86 | 2.5E-01 |
| B035DRAFT_00296 | Protein of unknown function (DUF1349).                                                  | 14.9  | 13.6  | 11.7  | 11.8  | 14.9  | 13.9  | 1.01 | 9.5E-01 |
| B035DRAFT_00297 | valyl-tRNA synthetase( EC:6.1.1.9 )                                                     | 422.5 | 400.9 | 374.5 | 387.2 | 450.8 | 346.9 | 0.98 | 9.3E-01 |
| B035DRAFT_00298 | Predicted Zn-dependent peptidases                                                       | 70.2  | 71.0  | 76.3  | 75.8  | 89.5  | 119.2 | 1.29 | 3.2E-01 |
| B035DRAFT_00299 | hypothetical protein                                                                    | 57.6  | 60.1  | 47.7  | 118.6 | 149.7 | 166.0 | 2.61 | 2.4E-02 |
| B035DRAFT_00300 | RNA polymerase sigma factor, sigma-70 family                                            | 21.5  | 27.9  | 25.5  | 43.4  | 41.8  | 42.5  | 1.72 | 3.1E-02 |
| B035DRAFT_00301 | hypothetical protein                                                                    | 59.0  | 76.5  | 65.8  | 83.0  | 80.0  | 104.8 | 1.33 | 2.2E-01 |
| B035DRAFT_00302 | hypothetical protein                                                                    | 470.4 | 565.1 | 546.8 | 617.6 | 667.3 | 769.3 | 1.30 | 1.6E-01 |
| B035DRAFT_00303 | hypothetical protein                                                                    | 103.0 | 105.4 | 104.7 | 152.2 | 172.6 | 151.4 | 1.52 | 1.6E-02 |
| B035DRAFT_00304 | preprotein translocase, SecA subunit                                                    | 863.3 | 817.6 | 846.6 | 871.8 | 868.1 | 794.2 | 1.00 | 9.8E-01 |
| B035DRAFT_00305 | Arylsulfatase A and related enzymes                                                     | 226.4 | 262.3 | 261.7 | 273.3 | 268.4 | 291.5 | 1.11 | 3.1E-01 |
| B035DRAFT_00306 | hypothetical protein                                                                    | 78.3  | 86.3  | 79.1  | 72.5  | 81.1  | 56.2  | 0.85 | 4.4E-01 |
| B035DRAFT_00307 | pantothenate kinase, type III( EC:2.7.1.33 )                                            | 144.1 | 171.0 | 150.0 | 178.3 | 151.7 | 159.8 | 1.05 | 6.9E-01 |
| B035DRAFT_00308 | hypothetical protein                                                                    | 367.3 | 402.6 | 363.1 | 418.0 | 398.6 | 456.1 | 1.12 | 2.5E-01 |

|                 |                                                                                                     |        |        |        |        |        |        |  |      |         |
|-----------------|-----------------------------------------------------------------------------------------------------|--------|--------|--------|--------|--------|--------|--|------|---------|
| B035DRAFT_00309 | Tetratricopeptide repeat.                                                                           | 820.6  | 933.0  | 819.3  | 805.6  | 897.8  | 1098.1 |  | 1.08 | 6.7E-01 |
| B035DRAFT_00310 | Protein of unknown function (DUF1239).                                                              | 184.3  | 199.2  | 171.8  | 162.2  | 191.2  | 218.9  |  | 1.02 | 9.0E-01 |
| B035DRAFT_00311 | Hemolysins and related proteins containing CBS domains                                              | 103.8  | 128.9  | 108.2  | 107.4  | 117.8  | 142.8  |  | 1.08 | 7.1E-01 |
| B035DRAFT_00312 | hypothetical protein( EC:5.2.1.8 )                                                                  | 991.9  | 1079.0 | 989.0  | 841.6  | 909.1  | 1090.3 |  | 0.92 | 5.9E-01 |
| B035DRAFT_00313 | ketol-acid reductoisomerase( EC:1.1.1.86 )                                                          | 564.7  | 632.3  | 578.1  | 458.0  | 497.8  | 493.8  |  | 0.82 | 7.3E-02 |
| B035DRAFT_00314 | Acyl-ACP thioesterase                                                                               | 199.5  | 214.6  | 178.9  | 173.3  | 194.3  | 178.2  |  | 0.92 | 4.7E-01 |
| B035DRAFT_00315 | acetolactate synthase, small subunit( EC:2.2.1.6 )                                                  | 252.8  | 258.3  | 231.8  | 221.7  | 234.6  | 254.5  |  | 0.96 | 6.4E-01 |
| B035DRAFT_00316 | acetolactate synthase, large subunit, biosynthetic type( EC:2.2.1.6 )                               | 231.5  | 237.8  | 219.6  | 196.6  | 202.5  | 151.4  |  | 0.79 | 2.3E-01 |
| B035DRAFT_00317 | dihydroxy-acid dehydratase( EC:4.2.1.9 )                                                            | 234.1  | 239.9  | 264.2  | 147.7  | 156.8  | 103.8  |  | 0.55 | 7.6E-02 |
| B035DRAFT_00318 | hypothetical protein                                                                                | 1.0    | 5.5    | 1.2    | 1.0    | 2.6    | 1.7    |  | 0.90 | 9.3E-01 |
| B035DRAFT_00319 | hypothetical protein                                                                                | 2.8    | 3.3    | 2.3    | 2.0    | 0.9    | 2.6    |  | 0.59 | 4.1E-01 |
| B035DRAFT_00320 | FKBP-type peptidyl-prolyl cis-trans isomerases 2( EC:5.2.1.8 )                                      | 1589.4 | 1566.4 | 1482.2 | 2267.1 | 1985.8 | 1734.3 |  | 1.28 | 1.5E-01 |
| B035DRAFT_00321 | hypothetical protein                                                                                | 28.8   | 19.5   | 24.8   | 32.8   | 31.5   | 35.9   |  | 1.39 | 1.9E-01 |
| B035DRAFT_00322 | hypothetical protein                                                                                | 30.4   | 47.8   | 37.0   | 33.9   | 51.9   | 66.6   |  | 1.30 | 5.4E-01 |
| B035DRAFT_00323 | hypothetical protein                                                                                | 111.9  | 133.4  | 117.6  | 138.6  | 137.4  | 186.7  |  | 1.27 | 2.9E-01 |
| B035DRAFT_00324 | hypothetical protein                                                                                | 36.1   | 37.0   | 35.7   | 30.9   | 42.2   | 26.1   |  | 0.89 | 6.6E-01 |
| B035DRAFT_00325 | hypothetical protein                                                                                | 24.1   | 24.5   | 13.5   | 19.1   | 21.0   | 23.8   |  | 1.06 | 8.9E-01 |
| B035DRAFT_00326 | hypothetical protein                                                                                | 19.8   | 28.3   | 31.5   | 11.2   | 11.0   | 11.1   |  | 0.43 | 4.3E-02 |
| B035DRAFT_00327 | TonB-linked outer membrane protein, SusC/RagA family                                                | 36.3   | 31.5   | 31.1   | 12.9   | 18.4   | 17.1   |  | 0.48 | 4.2E-02 |
| B035DRAFT_00328 | SusD family                                                                                         | 41.3   | 37.1   | 39.2   | 14.1   | 20.3   | 22.5   |  | 0.47 | 6.1E-02 |
| B035DRAFT_00329 | Glycoside hydrolase (GH123)                                                                         | 22.4   | 26.0   | 28.0   | 20.8   | 25.9   | 20.1   |  | 0.87 | 4.7E-01 |
| B035DRAFT_00330 | Galactose mutarotase and related enzymes                                                            | 116.8  | 111.7  | 124.9  | 128.9  | 135.4  | 87.9   |  | 0.98 | 9.4E-01 |
| B035DRAFT_00331 | Response regulators consisting of a CheY-like receiver domain and a winged-helix DNA-binding domain | 15.3   | 13.5   | 16.8   | 15.9   | 17.5   | 21.1   |  | 1.19 | 3.8E-01 |
| B035DRAFT_00332 | Histidine kinase-, DNA gyrase B-, and HSP90-like ATPase.                                            | 10.2   | 8.6    | 8.0    | 8.3    | 9.4    | 10.9   |  | 1.06 | 7.6E-01 |
| B035DRAFT_00333 | Protein of unknown function (Porph_ging).                                                           | 4.1    | 3.1    | 5.4    | 3.2    | 4.2    | 3.3    |  | 0.87 | 6.7E-01 |
| B035DRAFT_00334 | hypothetical protein                                                                                | 22.0   | 14.9   | 21.4   | 12.2   | 13.2   | 8.0    |  | 0.57 | 1.8E-01 |
| B035DRAFT_00335 | Putative regulator of cell autolysis                                                                | 39.5   | 34.7   | 42.3   | 27.4   | 27.3   | 35.6   |  | 0.77 | 2.2E-01 |
| B035DRAFT_00336 | Response regulator of the LytR/AlgR family                                                          | 33.7   | 37.1   | 37.2   | 28.2   | 35.4   | 41.9   |  | 0.97 | 8.8E-01 |
| B035DRAFT_00337 | Arylsulfatase A and related enzymes                                                                 | 113.0  | 112.8  | 123.6  | 109.0  | 126.2  | 128.4  |  | 1.04 | 7.3E-01 |
| B035DRAFT_00338 | hypothetical protein                                                                                | 121.1  | 119.1  | 121.5  | 107.8  | 122.6  | 117.0  |  | 0.96 | 5.4E-01 |
| B035DRAFT_00339 | protein RecA                                                                                        | 1108.4 | 1106.1 | 1050.2 | 1148.4 | 1218.6 | 1138.9 |  | 1.07 | 2.1E-01 |
| B035DRAFT_00340 | Peroxiredoxin( EC:1.11.1.15 )                                                                       | 611.8  | 579.4  | 509.1  | 597.1  | 694.7  | 666.6  |  | 1.15 | 3.0E-01 |
| B035DRAFT_00341 | Saccharopine dehydrogenase and related proteins( EC:1.5.1.7 )                                       | 549.1  | 549.6  | 542.5  | 578.3  | 668.4  | 645.7  |  | 1.15 | 1.5E-01 |
| B035DRAFT_00342 | hypothetical protein                                                                                | 166.8  | 174.1  | 164.1  | 166.3  | 157.6  | 137.0  |  | 0.91 | 4.0E-01 |
| B035DRAFT_00343 | Heat shock protein                                                                                  | 1237.2 | 1228.7 | 1224.0 | 1299.2 | 1042.8 | 1138.1 |  | 0.94 | 5.9E-01 |
| B035DRAFT_00344 | hypothetical protein                                                                                | 154.1  | 161.9  | 147.9  | 135.7  | 126.3  | 142.7  |  | 0.87 | 1.6E-01 |
| B035DRAFT_00345 | hypothetical protein                                                                                | 105.1  | 117.2  | 111.5  | 92.9   | 81.5   | 120.7  |  | 0.87 | 5.3E-01 |
| B035DRAFT_00346 | chaperone protein DnaK                                                                              | 2083.6 | 1775.8 | 1928.5 | 1801.4 | 1738.7 | 1896.6 |  | 0.94 | 5.2E-01 |
| B035DRAFT_00347 | DNA binding domain, excisionase family                                                              | 55.4   | 55.7   | 34.8   | 45.3   | 56.0   | 60.2   |  | 1.12 | 7.2E-01 |
| B035DRAFT_00348 | Site-specific recombinase XerD                                                                      | 44.9   | 44.0   | 37.2   | 37.7   | 51.8   | 52.0   |  | 1.11 | 6.2E-01 |
| B035DRAFT_00349 | Predicted transcriptional regulator                                                                 | 52.0   | 53.9   | 51.2   | 53.3   | 60.7   | 72.6   |  | 1.18 | 3.3E-01 |
| B035DRAFT_00350 | hypothetical protein                                                                                | 75.0   | 74.0   | 72.0   | 69.5   | 95.8   | 113.5  |  | 1.24 | 4.2E-01 |
| B035DRAFT_00351 | hypothetical protein                                                                                | 43.3   | 38.4   | 40.0   | 35.8   | 66.9   | 77.0   |  | 1.41 | 4.3E-01 |
| B035DRAFT_00352 | hypothetical protein                                                                                | 6.1    | 3.3    | 4.0    | 4.4    | 6.4    | 7.3    |  | 1.37 | 4.6E-01 |
| B035DRAFT_00353 | hypothetical protein                                                                                | 3.7    | 4.7    | 5.2    | 5.0    | 5.3    | 7.0    |  | 1.28 | 3.7E-01 |
| B035DRAFT_00354 | hypothetical protein                                                                                | 6.9    | 4.8    | 2.6    | 5.0    | 4.0    | 5.2    |  | 1.07 | 9.1E-01 |
| B035DRAFT_00355 | Plasmid recombination enzyme.                                                                       | 3.0    | 3.7    | 3.0    | 3.2    | 3.6    | 2.2    |  | 0.92 | 7.9E-01 |
| B035DRAFT_00356 | Site-specific recombinase XerD                                                                      | 6.0    | 4.4    | 7.1    | 6.5    | 5.6    | 6.7    |  | 1.10 | 7.4E-01 |
| B035DRAFT_00357 | Restriction endonuclease S subunits                                                                 | 69.8   | 72.4   | 64.6   | 64.7   | 83.9   | 99.5   |  | 1.18 | 4.7E-01 |
| B035DRAFT_00358 | Restriction endonuclease S subunits                                                                 | 117.7  | 144.5  | 129.9  | 154.4  | 146.4  | 173.4  |  | 1.21 | 2.2E-01 |



|                 |                                                                                                                    |        |        |        |        |        |        |      |         |
|-----------------|--------------------------------------------------------------------------------------------------------------------|--------|--------|--------|--------|--------|--------|------|---------|
| B035DRAFT_00359 | Restriction endonuclease S subunits( EC:3.1.21.3 )                                                                 | 59.9   | 59.2   | 54.3   | 57.0   | 70.2   | 83.5   | 1.20 | 3.9E-01 |
| B035DRAFT_00360 | AlPR protein.                                                                                                      | 87.2   | 102.1  | 91.9   | 82.1   | 100.8  | 132.0  | 1.10 | 7.2E-01 |
| B035DRAFT_00361 | Prophage maintenance system killer protein                                                                         | 62.7   | 79.1   | 66.4   | 66.4   | 71.4   | 91.0   | 1.09 | 6.8E-01 |
| B035DRAFT_00362 | hypothetical protein                                                                                               | 94.5   | 107.7  | 93.4   | 96.5   | 112.6  | 144.5  | 1.18 | 4.6E-01 |
| B035DRAFT_00363 | Type I restriction-modification system methyltransferase subunit( EC:2.1.1.72 )                                    | 99.6   | 95.3   | 90.9   | 95.2   | 116.9  | 137.1  | 1.21 | 3.5E-01 |
| B035DRAFT_00364 | Type I site-specific restriction-modification system, R (restriction) subunit and related helicases( EC:3.1.21.3 ) | 105.4  | 111.1  | 106.2  | 105.8  | 107.7  | 110.0  | 1.00 | 9.5E-01 |
| B035DRAFT_00365 | Predicted transcriptional regulators                                                                               | 82.4   | 92.0   | 79.4   | 93.6   | 83.6   | 82.3   | 1.02 | 8.5E-01 |
| B035DRAFT_00366 | hypothetical protein                                                                                               | 3.3    | 4.6    | 5.1    | 2.5    | 3.8    | 4.7    | 0.83 | 6.6E-01 |
| B035DRAFT_00367 | hypothetical protein                                                                                               | 2.3    | 2.1    | 2.2    | 1.1    | 1.2    | 2.2    | 0.66 | 3.1E-01 |
| B035DRAFT_00368 | hypothetical protein                                                                                               | 1.0    | 5.6    | 4.7    | 6.1    | 4.4    | 4.4    | 1.66 | 6.2E-01 |
| B035DRAFT_00369 | hypothetical protein                                                                                               | 4.0    | 6.2    | 6.4    | 4.9    | 6.0    | 4.2    | 0.92 | 8.2E-01 |
| B035DRAFT_00370 | pyruvate:ferredoxin (flavodoxin) oxidoreductase, homodimeric( EC:1.2.7.)                                           | 923.7  | 904.7  | 947.5  | 959.9  | 1123.3 | 1065.0 | 1.13 | 2.1E-01 |
| B035DRAFT_00371 | Predicted ATPase (AAA+ superfamily)                                                                                | 487.6  | 495.8  | 462.4  | 485.7  | 503.0  | 527.2  | 1.05 | 4.2E-01 |
| B035DRAFT_00372 | hypothetical protein                                                                                               | 98.1   | 104.0  | 109.7  | 123.5  | 106.0  | 77.0   | 0.97 | 9.0E-01 |
| B035DRAFT_00373 | Predicted membrane protein                                                                                         | 55.8   | 50.8   | 61.2   | 51.2   | 57.0   | 37.4   | 0.86 | 5.3E-01 |
| B035DRAFT_00374 | putative DNA modification/repair radical SAM protein                                                               | 47.2   | 45.2   | 52.3   | 89.1   | 80.5   | 59.6   | 1.57 | 1.3E-01 |
| B035DRAFT_00375 | probable DNA metabolism protein                                                                                    | 71.7   | 72.6   | 80.0   | 78.5   | 88.3   | 81.4   | 1.11 | 2.9E-01 |
| B035DRAFT_00376 | pseudouridylate synthase I( EC:5.4.99.12 )                                                                         | 125.0  | 122.0  | 122.5  | 125.7  | 133.9  | 98.9   | 0.96 | 8.3E-01 |
| B035DRAFT_00377 | hypothetical protein                                                                                               | 136.1  | 152.7  | 152.6  | 135.1  | 139.7  | 113.3  | 0.88 | 3.5E-01 |
| B035DRAFT_00378 | Phosphate starvation-inducible protein PhoH, predicted ATPase                                                      | 143.9  | 141.2  | 124.2  | 124.8  | 156.7  | 125.5  | 0.99 | 9.6E-01 |
| B035DRAFT_00379 | Phosphoribosylaminoimidazolesuccinocarboxamide (SAICAR) synthase( EC:6.3.2.6 )                                     | 366.1  | 348.3  | 317.6  | 291.1  | 357.0  | 359.2  | 0.97 | 8.6E-01 |
| B035DRAFT_00380 | ubiquinone/menaquinone biosynthesis methyltransferases( EC:2.1.1.- .EC:2.1.1.163 )                                 | 107.1  | 113.4  | 117.3  | 103.9  | 128.3  | 133.8  | 1.08 | 6.2E-01 |
| B035DRAFT_00381 | Shikimate 5-dehydrogenase( EC:1.1.1.25 )                                                                           | 96.3   | 90.0   | 91.4   | 92.5   | 110.9  | 116.4  | 1.15 | 3.2E-01 |
| B035DRAFT_00382 | Hydrolases of the alpha/beta superfamily                                                                           | 122.6  | 110.1  | 127.7  | 110.6  | 112.5  | 83.5   | 0.84 | 3.9E-01 |
| B035DRAFT_00383 | chorismate synthase( EC:4.2.3.5 )                                                                                  | 263.7  | 261.6  | 242.0  | 341.8  | 390.3  | 358.2  | 1.42 | 2.7E-02 |
| B035DRAFT_00384 | Acetylnithine deacetylase/Succinyl-diaminopimelate desuccinylase and related deacylases                            | 108.6  | 114.8  | 103.3  | 100.5  | 136.2  | 134.1  | 1.13 | 5.2E-01 |
| B035DRAFT_00385 | Nitroreductase                                                                                                     | 86.1   | 95.7   | 90.9   | 89.2   | 96.9   | 105.5  | 1.07 | 5.2E-01 |
| B035DRAFT_00386 | xanthine phosphoribosyltransferase( EC:2.4.2.22 )                                                                  | 81.6   | 79.7   | 72.9   | 85.9   | 82.4   | 85.8   | 1.09 | 2.6E-01 |
| B035DRAFT_00387 | xanthine permease                                                                                                  | 99.3   | 115.7  | 112.3  | 104.1  | 115.2  | 123.3  | 1.05 | 7.2E-01 |
| B035DRAFT_00388 | Uncharacterized protein conserved in bacteria                                                                      | 68.5   | 71.0   | 70.2   | 74.5   | 81.4   | 61.2   | 1.03 | 8.7E-01 |
| B035DRAFT_00389 | hypothetical protein                                                                                               | 35.3   | 46.9   | 32.2   | 55.3   | 66.1   | 73.1   | 1.71 | 1.0E-01 |
| B035DRAFT_00390 | N-acetylmuramoyl-L-alanine amidase( EC:3.5.1.28 )                                                                  | 177.5  | 168.5  | 167.2  | 176.3  | 202.5  | 159.4  | 1.04 | 7.5E-01 |
| B035DRAFT_00391 | Peroxioredoxin                                                                                                     | 117.2  | 125.9  | 110.8  | 120.2  | 147.3  | 113.5  | 1.07 | 6.7E-01 |
| B035DRAFT_00392 | hypothetical protein                                                                                               | 12.5   | 18.3   | 13.6   | 8.9    | 9.7    | 11.4   | 0.68 | 1.8E-01 |
| B035DRAFT_00393 | Lysyl-tRNA synthetase (class II)( EC:6.1.1.6 )                                                                     | 521.3  | 544.1  | 539.8  | 517.6  | 542.8  | 589.1  | 1.03 | 7.3E-01 |
| B035DRAFT_00394 | Glycerol-3-phosphate dehydrogenase( EC:1.1.1.94 )                                                                  | 388.7  | 429.2  | 423.9  | 386.0  | 413.7  | 490.8  | 1.03 | 8.2E-01 |
| B035DRAFT_00395 | Glucose-6-phosphate isomerase( EC:5.3.1.9 )                                                                        | 543.4  | 592.2  | 578.5  | 500.5  | 557.7  | 613.6  | 0.97 | 8.2E-01 |
| B035DRAFT_00396 | haloacid dehalogenase superfamily, subfamily IA, variant 3 with third motif having DD or ED                        | 182.5  | 203.6  | 195.2  | 173.5  | 188.3  | 214.1  | 0.99 | 9.3E-01 |
| B035DRAFT_00397 | Transcriptional regulator/sugar kinase                                                                             | 243.8  | 243.3  | 212.2  | 226.4  | 313.2  | 350.1  | 1.25 | 3.8E-01 |
| B035DRAFT_00398 | glucosamine-6-phosphate isomerase( EC:3.5.99.6 )                                                                   | 1095.7 | 1076.5 | 1104.9 | 1178.1 | 1109.4 | 1202.0 | 1.06 | 2.2E-01 |
| B035DRAFT_00399 | 6-phosphogluconolactonase/Glucosamine-6-phosphate isomerase/deaminase( EC:3.5.99.6 ) (CE14)                        | 1955.1 | 1891.2 | 2044.4 | 2062.7 | 1734.2 | 1812.9 | 0.95 | 6.2E-01 |
| B035DRAFT_00400 | Domain of unknown function (DUF303).( EC:3.1.1.53 ) (CE6)                                                          | 28.7   | 24.7   | 25.0   | 23.8   | 21.3   | 25.0   | 0.89 | 3.7E-01 |
| B035DRAFT_00401 | Beta-galactosidase/beta-glucuronidase (GH2)                                                                        | 20.9   | 20.7   | 23.9   | 22.5   | 21.6   | 21.0   | 0.99 | 9.6E-01 |
| B035DRAFT_00402 | TIGR02757 family protein                                                                                           | 31.1   | 36.4   | 32.5   | 36.4   | 34.8   | 41.4   | 1.12 | 3.7E-01 |

|                        |                                                                            |              |              |              |              |              |              |             |                |
|------------------------|----------------------------------------------------------------------------|--------------|--------------|--------------|--------------|--------------|--------------|-------------|----------------|
| B035DRAFT_00403        | RNA polymerase sigma-70 factor, Bacteroides expansion family 1             | 32.3         | 49.0         | 43.1         | 39.5         | 38.8         | 45.6         | 1.01        | 9.8E-01        |
| B035DRAFT_00404        | Fe2+-dicitrate sensor, membrane component                                  | 83.6         | 88.0         | 92.1         | 119.8        | 110.2        | 127.0        | 1.35        | 4.3E-02        |
| B035DRAFT_00405        | TonB-linked outer membrane protein, SusC/RagA family                       | 7.5          | 6.8          | 6.6          | 5.0          | 4.3          | 5.0          | 0.69        | 3.9E-02        |
| B035DRAFT_00406        | SusD family                                                                | 5.4          | 6.7          | 6.4          | 3.5          | 4.4          | 4.4          | 0.66        | 8.6E-02        |
| B035DRAFT_00407        | NPCBM/NEW2 domain (CBM51)                                                  | 9.1          | 7.7          | 6.7          | 8.7          | 8.9          | 7.3          | 1.07        | 7.6E-01        |
| B035DRAFT_00408        | Glycoside hydrolase 97 ( EC:3.2.1.20 )                                     | 24.1         | 23.9         | 20.4         | 21.1         | 23.8         | 21.6         | 0.97        | 8.2E-01        |
| B035DRAFT_00409        | Alpha-L-fucosidase( EC:3.2.1.51 ) (GH29)                                   | 54.7         | 49.3         | 49.0         | 41.9         | 55.3         | 39.8         | 0.89        | 5.4E-01        |
| B035DRAFT_00410        | DNA-binding protein, histone-like, putative                                | 63.3         | 57.8         | 60.2         | 71.3         | 73.3         | 24.0         | 0.83        | 7.9E-01        |
| B035DRAFT_00411        | Acetyltransferase (isoleucine patch superfamily)                           | 17.1         | 11.8         | 18.2         | 18.6         | 18.5         | 17.7         | 1.18        | 5.0E-01        |
| B035DRAFT_00412        | AraC-type DNA-binding domain-containing proteins                           | 32.5         | 41.3         | 31.6         | 29.0         | 30.6         | 30.3         | 0.86        | 3.5E-01        |
| B035DRAFT_00413        | hypothetical protein                                                       | 16.5         | 16.6         | 14.9         | 25.3         | 25.0         | 34.3         | 1.74        | 6.2E-02        |
| B035DRAFT_00414        | hypothetical protein                                                       | 8.5          | 9.9          | 8.6          | 10.5         | 11.9         | 16.0         | 1.40        | 2.2E-01        |
| B035DRAFT_00415        | ABC-type multidrug transport system, ATPase component                      | 20.4         | 27.6         | 23.9         | 22.8         | 27.9         | 30.3         | 1.13        | 5.9E-01        |
| B035DRAFT_00416        | N-acetylglucosamine-6-phosphate deacetylase( EC:3.5.1.25 ) (CE9)           | 328.4        | 323.2        | 309.6        | 258.0        | 313.4        | 259.4        | 0.86        | 2.5E-01        |
| B035DRAFT_00417        | Beta-galactosidase/beta-glucuronidase( EC:3.2.1.23 ) (GH2)                 | 316.2        | 280.8        | 306.1        | 500.6        | 534.8        | 507.0        | 1.71        | 5.9E-03        |
| B035DRAFT_00418        | alpha-1,2-mannosidase, putative (GH92)                                     | 221.0        | 193.9        | 198.5        | 308.6        | 360.9        | 370.6        | 1.69        | 2.6E-02        |
| B035DRAFT_00419        | N-acetyl-beta-hexosaminidase( EC:3.2.1.52 ) (GH20)                         | 167.4        | 156.2        | 162.1        | 226.7        | 271.9        | 248.3        | 1.53        | 2.5E-02        |
| B035DRAFT_00420        | cyclically-permuted mutator family protein                                 | 118.1        | 112.7        | 118.1        | 172.1        | 201.5        | 176.1        | 1.57        | 2.0E-02        |
| B035DRAFT_00421        | N-acetyl-beta-hexosaminidase( EC:3.2.1.52 ) (GH20)                         | 233.7        | 218.0        | 225.2        | 323.7        | 414.7        | 448.9        | 1.74        | 5.3E-02        |
| B035DRAFT_00422        | Beta-galactosidase/beta-glucuronidase( EC:3.2.1.25 ) (GH2)                 | 128.9        | 123.7        | 124.3        | 182.0        | 238.0        | 191.7        | 1.61        | 4.7E-02        |
| B035DRAFT_00423        | Lysophospholipase L1 and related esterases( EC:3.1.1.53 ) (CE3)            | 38.2         | 35.8         | 36.2         | 102.7        | 119.9        | 129.0        | 3.18        | 2.7E-03        |
| B035DRAFT_00424        | Lysophospholipase L1 and related esterases (CE3)                           | 31.7         | 35.4         | 36.7         | 91.6         | 126.0        | 137.2        | 3.37        | 1.7E-02        |
| B035DRAFT_00425        | N-acetyl-beta-hexosaminidase (GH20)                                        | 30.9         | 33.0         | 33.4         | 108.2        | 118.5        | 121.3        | 3.57        | 3.1E-04        |
| B035DRAFT_00426        | BNR/Asp-box repeat.( EC:3.2.1.18 ) (GH33)                                  | 117.8        | 109.8        | 122.0        | 395.5        | 496.2        | 465.6        | 3.87        | 1.9E-03        |
| B035DRAFT_00427        | SusD family                                                                | 485.1        | 511.5        | 477.0        | 643.2        | 824.7        | 854.8        | 1.56        | 6.7E-02        |
| <b>B035DRAFT_00428</b> | <b>TonB-linked outer membrane protein, SusC/RagA family</b>                | <b>424.7</b> | <b>429.1</b> | <b>437.8</b> | <b>431.0</b> | <b>455.8</b> | <b>456.8</b> | <b>1.04</b> | <b>3.2E-01</b> |
| B035DRAFT_00429        | ( tRNA )                                                                   | 27.0         | 23.6         | 35.6         | 23.7         | 12.3         | 43.0         | 0.82        | 7.8E-01        |
| B035DRAFT_00430        | aspartate--ammonia ligase, AsnA-type( EC:6.3.1.1 )                         | 334.9        | 428.8        | 344.0        | 381.3        | 361.7        | 399.7        | 1.04        | 8.2E-01        |
| B035DRAFT_00431        | uracil-DNA glycosylase( EC:3.2.2.27 )                                      | 110.1        | 125.3        | 119.4        | 133.8        | 121.0        | 137.1        | 1.10        | 3.3E-01        |
| B035DRAFT_00432        | hypothetical protein                                                       | 286.9        | 309.6        | 291.4        | 327.5        | 313.8        | 324.0        | 1.09        | 1.5E-01        |
| B035DRAFT_00433        | Predicted HD superfamily hydrolase involved in NAD metabolism              | 75.8         | 84.1         | 85.4         | 96.7         | 88.4         | 112.4        | 1.21        | 2.3E-01        |
| B035DRAFT_00434        | Uncharacterized protein conserved in bacteria                              | 37.1         | 47.0         | 40.7         | 55.0         | 50.9         | 58.7         | 1.32        | 1.3E-01        |
| B035DRAFT_00435        | Periplasmic protease                                                       | 71.8         | 88.9         | 72.9         | 96.3         | 94.6         | 113.3        | 1.30        | 1.7E-01        |
| B035DRAFT_00436        | Uncharacterized lipoprotein NlpE involved in copper resistance.            | 703.8        | 720.4        | 662.2        | 684.9        | 481.2        | 537.6        | 0.81        | 3.0E-01        |
| B035DRAFT_00437        | hypothetical protein                                                       | 1710.9       | 1636.7       | 1684.0       | 1733.5       | 1243.9       | 1309.6       | 0.84        | 3.8E-01        |
| B035DRAFT_00438        | hypothetical protein                                                       | 2388.6       | 2503.9       | 2607.3       | 2579.5       | 2160.4       | 2675.3       | 0.99        | 9.2E-01        |
| B035DRAFT_00439        | Glycosyltransferases involved in cell wall biogenesis( EC:2.4.1.83 ) (GT2) | 320.5        | 304.2        | 292.2        | 356.1        | 334.4        | 335.3        | 1.12        | 1.4E-01        |
| B035DRAFT_00440        | dihydroorotase, multifunctional complex type( EC:3.5.2.3 )                 | 292.5        | 291.5        | 298.9        | 333.6        | 335.8        | 321.8        | 1.12        | 2.6E-02        |
| B035DRAFT_00441        | Vitamin B12 dependent methionine synthase, activation domain.              | 195.8        | 212.7        | 215.7        | 230.3        | 230.8        | 246.4        | 1.13        | 1.4E-01        |
| B035DRAFT_00442        | hypothetical protein                                                       | 0.0          | 0.0          | 0.0          | 0.0          | 0.0          | 0.0          | 0.00        |                |
| B035DRAFT_00443        | hypothetical protein                                                       | 0.0          | 0.0          | 0.0          | 0.0          | 0.0          | 0.0          | 0.00        |                |
| B035DRAFT_00444        | SusD family                                                                | 22.0         | 30.2         | 27.5         | 13.7         | 13.7         | 15.2         | 0.54        | 4.2E-02        |
| B035DRAFT_00445        | TonB-linked outer membrane protein, SusC/RagA family                       | 9.0          | 10.0         | 9.7          | 5.2          | 5.0          | 6.0          | 0.56        | 1.9E-02        |
| B035DRAFT_00446        | Signal transduction histidine kinase                                       | 45.2         | 40.0         | 39.5         | 26.3         | 30.3         | 31.5         | 0.71        | 6.5E-02        |
| B035DRAFT_00447        | 6-phosphofructokinase( EC:2.7.1.11 )                                       | 103.9        | 114.2        | 114.9        | 131.4        | 130.4        | 119.7        | 1.15        | 1.6E-01        |
| B035DRAFT_00448        | GH3 auxin-responsive promoter.                                             | 228.4        | 228.2        | 211.8        | 207.2        | 240.7        | 208.4        | 0.98        | 8.5E-01        |
| B035DRAFT_00449        | hypothetical protein                                                       | 370.8        | 355.5        | 360.1        | 507.2        | 522.8        | 473.0        | 1.38        | 1.4E-02        |
| B035DRAFT_00450        | Protein of unknown function (DUF3108).                                     | 175.8        | 172.2        | 163.3        | 199.5        | 219.8        | 148.2        | 1.10        | 6.8E-01        |
| B035DRAFT_00451        | hypothetical protein                                                       | 52.2         | 49.0         | 52.6         | 62.5         | 72.9         | 76.3         | 1.37        | 6.5E-02        |
| B035DRAFT_00452        | hypothetical protein                                                       | 10.6         | 4.1          | 8.6          | 7.4          | 11.2         | 3.2          | 0.89        | 9.1E-01        |
| B035DRAFT_00453        | N-acetyl-beta-hexosaminidase (GH20)                                        | 39.9         | 36.4         | 42.2         | 38.4         | 45.4         | 44.2         | 1.08        | 5.3E-01        |

|                 |                                                                                                                 |        |        |        |        |        |        |  |      |         |
|-----------------|-----------------------------------------------------------------------------------------------------------------|--------|--------|--------|--------|--------|--------|--|------|---------|
| B035DRAFT_00454 | cysteinyl-tRNA synthetase( EC:6.1.1.16 )                                                                        | 768.0  | 752.7  | 724.3  | 679.6  | 723.9  | 636.4  |  | 0.91 | 2.4E-01 |
| B035DRAFT_00455 | Uncharacterized conserved protein                                                                               | 254.2  | 213.1  | 209.7  | 297.3  | 286.4  | 200.2  |  | 1.14 | 5.9E-01 |
| B035DRAFT_00456 | tRNA (5-methylaminomethyl-2-thiouridylate)-methyltransferase( EC:2.8.1.)                                        | 37.9   | 38.8   | 40.6   | 40.9   | 46.7   | 42.9   |  | 1.11 | 2.3E-01 |
| B035DRAFT_00457 | Beta-galactosidase/beta-glucuronidase( EC:3.2.1.23 ) (GH2)                                                      | 135.7  | 136.2  | 138.7  | 117.6  | 136.9  | 125.1  |  | 0.92 | 3.4E-01 |
| B035DRAFT_00458 | Bacterial nucleoid DNA-binding protein                                                                          | 690.5  | 894.1  | 778.5  | 1006.4 | 852.0  | 957.7  |  | 1.20 | 3.0E-01 |
| B035DRAFT_00459 | Uncharacterized membrane protein (homolog of Drosophila rhomboid)                                               | 215.0  | 221.9  | 204.3  | 215.6  | 252.1  | 213.3  |  | 1.06 | 5.9E-01 |
| B035DRAFT_00460 | Uncharacterized membrane protein (homolog of Drosophila rhomboid)                                               | 314.4  | 263.6  | 266.0  | 286.8  | 331.9  | 289.0  |  | 1.08 | 5.8E-01 |
| B035DRAFT_00461 | Metal-dependent hydrolase                                                                                       | 131.2  | 134.4  | 135.1  | 123.2  | 155.3  | 128.2  |  | 1.01 | 9.5E-01 |
| B035DRAFT_00462 | Zn-dependent oligopeptidases( EC:3.4.15.5 )                                                                     | 184.9  | 156.4  | 162.1  | 160.3  | 206.8  | 143.7  |  | 1.01 | 9.8E-01 |
| B035DRAFT_00463 | protein-export membrane protein, SecD/SecE family                                                               | 1183.8 | 1178.5 | 1138.5 | 858.2  | 1025.3 | 1048.5 |  | 0.83 | 1.8E-01 |
| B035DRAFT_00464 | Sugar kinases, ribokinase family( EC:2.7.1.45 )                                                                 | 68.0   | 75.9   | 70.6   | 78.9   | 96.4   | 78.5   |  | 1.18 | 2.6E-01 |
| B035DRAFT_00465 | Nucleoside-diphosphate-sugar epimerases                                                                         | 686.5  | 703.5  | 673.1  | 761.6  | 907.7  | 905.0  |  | 1.24 | 1.1E-01 |
| B035DRAFT_00466 | 2-amino-3-ketobutyrate coenzyme A ligase( EC:2.3.1.29 )                                                         | 688.0  | 707.5  | 729.2  | 768.0  | 941.5  | 923.2  |  | 1.23 | 1.5E-01 |
| B035DRAFT_00467 | Alpha-L-fucosidase( EC:3.2.1.51 ) (GH29)                                                                        | 28.2   | 27.6   | 24.3   | 29.1   | 33.2   | 22.1   |  | 1.04 | 8.7E-01 |
| B035DRAFT_00468 | ( tRNA )                                                                                                        | 11.3   | 15.7   | 5.5    | 2.4    | 8.2    | 10.2   |  | 0.59 | 6.0E-01 |
| B035DRAFT_00469 | 2-oxoacid:acceptor oxidoreductase, alpha subunit( EC:1.2.7.3 )                                                  | 292.4  | 300.9  | 319.7  | 241.5  | 277.8  | 265.2  |  | 0.86 | 1.5E-01 |
| B035DRAFT_00470 | Pyruvate:ferredoxin oxidoreductase and related 2-oxoacid:ferredoxin oxidoreductases, beta subunit( EC:1.2.7.3 ) | 412.0  | 427.1  | 415.6  | 320.8  | 365.7  | 344.3  |  | 0.82 | 6.3E-02 |
| B035DRAFT_00471 | Uracil phosphoribosyltransferase( EC:2.4.2.9 )                                                                  | 112.9  | 130.3  | 112.7  | 122.3  | 127.6  | 115.8  |  | 1.03 | 7.8E-01 |
| B035DRAFT_00472 | phosphoenolpyruvate carboxykinase (ATP)( EC:4.1.1.49 )                                                          | 6005.1 | 6247.1 | 6247.4 | 5215.2 | 5870.2 | 6969.6 |  | 0.97 | 8.5E-01 |
| B035DRAFT_00473 | Nitroreductase                                                                                                  | 138.6  | 133.6  | 124.8  | 204.9  | 196.2  | 207.7  |  | 1.53 | 7.4E-03 |
| B035DRAFT_00474 | RNA polymerase sigma-70 factor, Bacteroides expansion family 1                                                  | 91.5   | 109.9  | 94.9   | 132.8  | 123.6  | 173.5  |  | 1.44 | 1.5E-01 |
| B035DRAFT_00475 | Fe2+-dicitrate sensor, membrane component                                                                       | 116.4  | 133.0  | 120.8  | 127.5  | 132.3  | 161.8  |  | 1.13 | 4.1E-01 |
| B035DRAFT_00476 | TonB-linked outer membrane protein, SusC/RagA family                                                            | 65.8   | 57.1   | 65.0   | 49.9   | 55.0   | 59.6   |  | 0.87 | 3.1E-01 |
| B035DRAFT_00477 | SusD family                                                                                                     | 35.2   | 32.1   | 37.0   | 31.9   | 33.4   | 37.2   |  | 0.98 | 8.9E-01 |
| B035DRAFT_00478 | Arylsulfatase A and related enzymes                                                                             | 106.7  | 117.6  | 115.6  | 125.2  | 136.1  | 147.5  |  | 1.20 | 1.4E-01 |
| B035DRAFT_00479 | GTP-binding protein TypA/BipA                                                                                   | 1014.9 | 986.7  | 943.9  | 986.9  | 1012.7 | 948.0  |  | 1.00 | 9.9E-01 |
| B035DRAFT_00480 | Response regulator containing a CheY-like receiver domain and a GGDEF domain                                    | 20.0   | 20.7   | 21.8   | 12.9   | 16.9   | 20.0   |  | 0.78 | 3.2E-01 |
| B035DRAFT_00481 | hypothetical protein                                                                                            | 16.7   | 19.4   | 15.4   | 26.7   | 20.8   | 23.8   |  | 1.39 | 1.4E-01 |
| B035DRAFT_00482 | Bacteriophage CI repressor helix-turn-helix domain.                                                             | 66.3   | 68.7   | 62.7   | 82.8   | 99.2   | 99.4   |  | 1.42 | 5.7E-02 |
| B035DRAFT_00483 | hypothetical protein                                                                                            | 1.6    | 4.7    | 4.0    | 4.3    | 0.0    | 0.0    |  | 1.37 |         |
| B035DRAFT_00484 | hypothetical protein                                                                                            | 4.2    | 2.9    | 0.0    | 0.9    | 0.8    | 2.3    |  | 0.33 | 2.1E-01 |
| B035DRAFT_00485 | hypothetical protein                                                                                            | 2.6    | 3.0    | 2.1    | 1.8    | 2.4    | 3.1    |  | 0.94 | 8.6E-01 |
| B035DRAFT_00486 | ( tRNA )                                                                                                        | 2.0    | 2.3    | 2.4    | 0.0    | 0.0    | 0.0    |  | 0.00 |         |
| B035DRAFT_00487 | hypothetical protein                                                                                            | 2.5    | 5.9    | 2.0    | 5.3    | 5.3    | 3.1    |  | 1.42 | 6.0E-01 |
| B035DRAFT_00488 | hypothetical protein                                                                                            | 3.8    | 2.7    | 3.7    | 2.4    | 2.1    | 2.8    |  | 0.72 | 2.4E-01 |
| B035DRAFT_00489 | hypothetical protein                                                                                            | 4.8    | 4.8    | 4.7    | 4.5    | 4.9    | 1.9    |  | 0.73 | 5.7E-01 |
| B035DRAFT_00490 | hypothetical protein                                                                                            | 6.0    | 5.9    | 6.9    | 6.5    | 6.9    | 4.6    |  | 0.95 | 8.4E-01 |
| B035DRAFT_00491 | hypothetical protein                                                                                            | 6.6    | 3.3    | 4.6    | 7.0    | 6.4    | 1.3    |  | 0.83 | 8.7E-01 |
| B035DRAFT_00492 | hypothetical protein                                                                                            | 3.9    | 1.8    | 4.1    | 2.7    | 5.0    | 1.4    |  | 0.87 | 8.8E-01 |
| B035DRAFT_00493 | hypothetical protein                                                                                            | 4.3    | 3.3    | 0.9    | 3.8    | 3.2    | 0.6    |  | 0.86 | 9.2E-01 |
| B035DRAFT_00494 | hypothetical protein                                                                                            | 6.7    | 2.1    | 3.7    | 1.3    | 6.0    | 3.3    |  | 0.79 | 8.3E-01 |
| B035DRAFT_00495 | hypothetical protein                                                                                            | 10.9   | 7.3    | 7.7    | 7.3    | 10.9   | 7.3    |  | 0.98 | 9.6E-01 |
| B035DRAFT_00496 | hypothetical protein                                                                                            | 11.5   | 11.1   | 9.2    | 11.4   | 11.3   | 4.8    |  | 0.81 | 6.9E-01 |
| B035DRAFT_00497 | hypothetical protein                                                                                            | 7.2    | 7.5    | 7.8    | 7.6    | 12.4   | 12.4   |  | 1.40 | 2.9E-01 |
| B035DRAFT_00498 | hypothetical protein                                                                                            | 8.6    | 12.4   | 15.7   | 7.8    | 9.5    | 13.4   |  | 0.84 | 6.9E-01 |
| B035DRAFT_00499 | hypothetical protein                                                                                            | 19.7   | 9.5    | 15.7   | 14.8   | 17.5   | 6.9    |  | 0.85 | 8.1E-01 |
| B035DRAFT_00500 | Protein of unknown function (DUF3164).                                                                          | 34.3   | 29.0   | 33.8   | 29.8   | 27.1   | 10.1   |  | 0.62 | 4.6E-01 |
| B035DRAFT_00501 | hypothetical protein                                                                                            | 11.6   | 5.4    | 11.3   | 8.6    | 11.6   | 5.3    |  | 0.90 | 8.8E-01 |
| B035DRAFT_00502 | hypothetical protein                                                                                            | 7.5    | 8.7    | 9.5    | 8.3    | 9.0    | 2.9    |  | 0.70 | 6.0E-01 |

|                 |                                                                                                |        |        |        |        |        |        |      |         |
|-----------------|------------------------------------------------------------------------------------------------|--------|--------|--------|--------|--------|--------|------|---------|
| B035DRAFT_00503 | hypothetical protein                                                                           | 2.1    | 2.5    | 0.6    | 2.5    | 1.0    | 1.7    | 1.06 | 9.5E-01 |
| B035DRAFT_00504 | hypothetical protein                                                                           | 225.9  | 276.6  | 255.3  | 435.4  | 314.8  | 183.4  | 1.16 | 7.6E-01 |
| B035DRAFT_00505 | Phage Mu protein F like protein.                                                               | 22.3   | 30.5   | 30.7   | 30.8   | 28.4   | 33.7   | 1.12 | 5.9E-01 |
| B035DRAFT_00506 | Mu-like prophage protein gp29                                                                  | 7.9    | 5.8    | 6.5    | 8.5    | 7.9    | 4.8    | 1.02 | 9.6E-01 |
| B035DRAFT_00507 | Protein of unknown function (DUF1320).                                                         | 3.6    | 2.8    | 5.8    | 3.8    | 3.2    | 1.1    | 0.61 | 5.4E-01 |
| B035DRAFT_00508 | hypothetical protein                                                                           | 5.4    | 4.1    | 5.8    | 4.1    | 5.6    | 2.7    | 0.79 | 5.6E-01 |
| B035DRAFT_00509 | Transcriptional regulator, contains sigma factor-related N-terminal domain                     | 4.2    | 4.4    | 3.2    | 2.4    | 3.4    | 2.7    | 0.73 | 2.5E-01 |
| B035DRAFT_00510 | Protease subunit of ATP-dependent Clp proteases                                                | 15.9   | 9.6    | 16.2   | 8.1    | 9.4    | 2.5    | 0.42 | 3.2E-01 |
| B035DRAFT_00511 | hypothetical protein                                                                           | 44.6   | 36.1   | 40.3   | 26.2   | 24.8   | 11.2   | 0.48 | 2.0E-01 |
| B035DRAFT_00512 | N-acetylmuramoyl-L-alanine amidase.( EC:3.5.1.28 )                                             | 12.7   | 12.7   | 21.7   | 11.1   | 12.2   | 4.0    | 0.54 | 4.0E-01 |
| B035DRAFT_00513 | hypothetical protein                                                                           | 46.7   | 35.5   | 40.4   | 20.2   | 25.7   | 5.6    | 0.35 | 2.7E-01 |
| B035DRAFT_00514 | hypothetical protein                                                                           | 34.7   | 25.2   | 42.1   | 22.1   | 16.6   | 5.8    | 0.39 | 2.6E-01 |
| B035DRAFT_00515 | hypothetical protein                                                                           | 25.9   | 23.4   | 25.3   | 18.1   | 11.0   | 6.6    | 0.44 | 1.8E-01 |
| B035DRAFT_00516 | hypothetical protein                                                                           | 37.2   | 34.8   | 31.8   | 18.2   | 23.7   | 8.0    | 0.44 | 2.2E-01 |
| B035DRAFT_00517 | hypothetical protein                                                                           | 20.6   | 20.4   | 33.4   | 13.4   | 16.5   | 6.6    | 0.47 | 2.4E-01 |
| B035DRAFT_00518 | tape measure domain                                                                            | 15.4   | 12.3   | 15.4   | 8.3    | 8.1    | 2.4    | 0.38 | 2.4E-01 |
| B035DRAFT_00519 | hypothetical protein                                                                           | 8.0    | 4.6    | 6.2    | 4.2    | 3.6    | 1.0    | 0.40 | 3.3E-01 |
| B035DRAFT_00520 | hypothetical protein                                                                           | 10.4   | 8.3    | 9.8    | 5.0    | 5.3    | 2.4    | 0.42 | 1.5E-01 |
| B035DRAFT_00521 | hypothetical protein                                                                           | 13.2   | 7.7    | 16.8   | 6.4    | 8.0    | 4.5    | 0.51 | 2.4E-01 |
| B035DRAFT_00522 | hypothetical protein                                                                           | 23.7   | 14.5   | 22.8   | 15.1   | 11.9   | 4.2    | 0.46 | 3.3E-01 |
| B035DRAFT_00523 | hypothetical protein                                                                           | 6.0    | 7.0    | 7.3    | 5.0    | 5.4    | 1.1    | 0.46 | 4.2E-01 |
| B035DRAFT_00524 | Retron-type reverse transcriptase                                                              | 97.0   | 68.6   | 104.4  | 71.9   | 62.5   | 16.2   | 0.47 | 4.1E-01 |
| B035DRAFT_00525 | hypothetical protein                                                                           | 88.6   | 94.9   | 89.7   | 80.9   | 88.2   | 46.8   | 0.76 | 4.5E-01 |
| B035DRAFT_00526 | hypothetical protein                                                                           | 34.1   | 39.6   | 49.1   | 28.5   | 39.1   | 23.4   | 0.73 | 3.6E-01 |
| B035DRAFT_00527 | Thymidylate synthase                                                                           | 66.3   | 52.1   | 74.6   | 57.6   | 55.6   | 27.6   | 0.70 | 4.5E-01 |
| B035DRAFT_00528 | Site-specific DNA methylase                                                                    | 79.2   | 79.0   | 80.3   | 72.4   | 63.6   | 66.4   | 0.85 | 8.2E-02 |
| B035DRAFT_00529 | Two component regulator propeller.                                                             | 81.9   | 92.4   | 77.0   | 70.5   | 74.2   | 85.0   | 0.91 | 5.2E-01 |
| B035DRAFT_00530 | hypothetical protein                                                                           | 702.2  | 812.0  | 708.2  | 999.2  | 890.0  | 992.3  | 1.30 | 8.2E-02 |
| B035DRAFT_00531 | Protein of unknown function (DUF3575).                                                         | 4.4    | 2.7    | 3.2    | 2.8    | 3.7    | 1.6    | 0.75 | 5.8E-01 |
| B035DRAFT_00532 | OmpA family                                                                                    | 5.2    | 3.5    | 6.0    | 3.5    | 3.7    | 3.0    | 0.71 | 3.0E-01 |
| B035DRAFT_00533 | conserved hypothetical protein (putative transposase or invertase)                             | 389.7  | 373.5  | 381.5  | 465.5  | 445.2  | 397.0  | 1.14 | 2.0E-01 |
| B035DRAFT_00534 | hypothetical protein                                                                           | 42.7   | 30.0   | 35.0   | 21.1   | 21.4   | 21.4   | 0.60 | 6.3E-02 |
| B035DRAFT_00535 | Protein of unknown function (DUF1812).                                                         | 15.7   | 14.2   | 15.1   | 6.4    | 7.9    | 6.9    | 0.47 | 1.1E-02 |
| B035DRAFT_00536 | hypothetical protein                                                                           | 10.8   | 6.8    | 10.9   | 5.5    | 5.6    | 5.2    | 0.58 | 1.3E-01 |
| B035DRAFT_00537 | hypothetical protein                                                                           | 9.7    | 10.0   | 10.5   | 4.9    | 5.8    | 4.8    | 0.51 | 1.3E-02 |
| B035DRAFT_00538 | hypothetical protein                                                                           | 17.5   | 11.6   | 18.3   | 7.9    | 5.7    | 9.1    | 0.48 | 1.1E-01 |
| B035DRAFT_00539 | hypothetical protein                                                                           | 16.3   | 19.6   | 23.7   | 6.1    | 9.1    | 11.0   | 0.43 | 9.0E-02 |
| B035DRAFT_00540 | hypothetical protein                                                                           | 33.1   | 31.4   | 40.9   | 22.6   | 20.4   | 26.2   | 0.66 | 1.0E-01 |
| B035DRAFT_00541 | AraC-type DNA-binding domain-containing proteins                                               | 40.8   | 43.8   | 48.5   | 26.3   | 24.7   | 26.7   | 0.59 | 1.6E-02 |
| B035DRAFT_00542 | Response regulator containing a CheY-like receiver domain and an HD-GYP domain                 | 57.6   | 70.9   | 66.2   | 47.1   | 41.7   | 45.8   | 0.69 | 6.1E-02 |
| B035DRAFT_00543 | ribosomal protein S15, bacterial/organelle                                                     | 4379.1 | 5463.3 | 5067.2 | 4558.2 | 4370.0 | 4147.9 | 0.88 | 3.3E-01 |
| B035DRAFT_00544 | Alpha-L-fucosidase( EC:3.2.1.51 ) (GH29)                                                       | 16.7   | 17.2   | 21.8   | 28.5   | 27.5   | 26.3   | 1.49 | 7.5E-02 |
| B035DRAFT_00545 | FOG: WD40-like repeat                                                                          | 9.4    | 7.1    | 10.0   | 10.0   | 12.2   | 10.2   | 1.23 | 3.5E-01 |
| B035DRAFT_00546 | Predicted phosphohydrolases                                                                    | 9.5    | 9.6    | 10.3   | 11.3   | 11.0   | 13.0   | 1.20 | 1.6E-01 |
| B035DRAFT_00547 | SusD family                                                                                    | 8.7    | 6.5    | 6.3    | 6.5    | 8.7    | 7.9    | 1.07 | 7.8E-01 |
| B035DRAFT_00548 | TonB-linked outer membrane protein, SusC/RagA family                                           | 19.0   | 17.7   | 18.5   | 15.7   | 23.7   | 26.1   | 1.16 | 6.1E-01 |
| B035DRAFT_00549 | Transcriptional regulator containing an amidase domain and an AraC-type DNA-binding HTH domain | 24.5   | 30.0   | 34.0   | 32.5   | 35.7   | 41.5   | 1.24 | 3.3E-01 |
| B035DRAFT_00550 | LuxS protein involved in autoinducer AI2 synthesis( EC:4.4.1.21 )                              | 152.2  | 139.0  | 139.6  | 183.3  | 167.3  | 168.4  | 1.20 | 7.8E-02 |

|                 |                                                                                                   |        |        |        |        |        |        |      |         |
|-----------------|---------------------------------------------------------------------------------------------------|--------|--------|--------|--------|--------|--------|------|---------|
| B035DRAFT_00551 | 5'-methylthioadenosine/S-adenosylhomocysteine nucleosidase( EC:3.2.2.9 )                          | 105.3  | 93.7   | 92.4   | 128.3  | 102.3  | 76.8   | 1.03 | 9.2E-01 |
| B035DRAFT_00552 | Bacterial membrane protein YfhO.                                                                  | 125.9  | 124.5  | 127.1  | 108.6  | 131.9  | 107.4  | 0.92 | 4.8E-01 |
| B035DRAFT_00553 | Glycosyltransferases involved in cell wall biogenesis (GT2)                                       | 99.2   | 117.9  | 114.9  | 112.9  | 117.7  | 149.4  | 1.14 | 4.8E-01 |
| B035DRAFT_00554 | Glycosyltransferase (GT4)                                                                         | 156.6  | 146.9  | 140.6  | 153.3  | 169.9  | 162.9  | 1.09 | 2.8E-01 |
| B035DRAFT_00555 | hypothetical protein (GT13)                                                                       | 35.0   | 41.1   | 33.8   | 42.5   | 48.0   | 46.6   | 1.25 | 1.5E-01 |
| B035DRAFT_00556 | hypothetical protein                                                                              | 39.8   | 45.7   | 40.5   | 42.5   | 55.4   | 61.2   | 1.25 | 3.2E-01 |
| B035DRAFT_00557 | hypothetical protein (GH99)                                                                       | 65.1   | 64.6   | 62.9   | 69.3   | 74.8   | 75.6   | 1.14 | 7.7E-02 |
| B035DRAFT_00558 | Acetyltransferase (isoleucine patch superfamily)                                                  | 27.5   | 28.2   | 26.1   | 30.6   | 30.2   | 29.4   | 1.10 | 1.0E-01 |
| B035DRAFT_00559 | Lipopolysaccharide biosynthesis proteins, LPS:glycosyltransferases (GT8)                          | 22.8   | 30.7   | 29.4   | 19.8   | 23.0   | 30.9   | 0.88 | 6.7E-01 |
| B035DRAFT_00560 | Membrane protein involved in the export of O-antigen and teichoic acid                            | 71.6   | 84.7   | 75.1   | 67.7   | 80.2   | 87.7   | 1.02 | 9.3E-01 |
| B035DRAFT_00561 | methionyl-tRNA synthetase/methionyl-tRNA synthetase C-terminal region/beta chain( EC:6.1.1.10 )   | 415.4  | 391.3  | 381.6  | 369.6  | 388.9  | 350.6  | 0.93 | 3.4E-01 |
| B035DRAFT_00562 | hypothetical protein                                                                              | 2.7    | 2.1    | 1.6    | 1.4    | 0.8    | 1.2    | 0.54 | 1.8E-01 |
| B035DRAFT_00563 | ABC-type bacteriocin/lantibiotic exporters, contain an N-terminal double-glycine peptidase domain | 4.8    | 4.5    | 7.6    | 4.5    | 3.6    | 4.5    | 0.76 | 4.0E-01 |
| B035DRAFT_00564 | hypothetical protein                                                                              | 4.2    | 9.1    | 7.3    | 6.9    | 8.1    | 6.5    | 1.10 | 8.4E-01 |
| B035DRAFT_00565 | hypothetical protein                                                                              | 6.0    | 4.6    | 5.7    | 3.2    | 8.5    | 5.1    | 0.95 | 9.4E-01 |
| B035DRAFT_00566 | hypothetical protein                                                                              | 5.7    | 7.6    | 13.9   | 14.6   | 14.8   | 14.1   | 1.72 | 2.9E-01 |
| B035DRAFT_00567 | hypothetical protein                                                                              | 7.3    | 8.5    | 3.6    | 5.2    | 4.4    | 9.3    | 0.98 | 9.8E-01 |
| B035DRAFT_00568 | hypothetical protein                                                                              | 7.4    | 7.8    | 5.7    | 7.8    | 9.2    | 11.8   | 1.37 | 2.9E-01 |
| B035DRAFT_00569 | radical SAM enzyme, rSAM/lipoprotein system                                                       | 7.8    | 4.5    | 4.4    | 5.1    | 9.9    | 3.4    | 1.04 | 9.7E-01 |
| B035DRAFT_00570 | putative lipoprotein, rSAM/lipoprotein system                                                     | 11.4   | 8.0    | 7.1    | 6.9    | 13.5   | 5.3    | 0.91 | 8.8E-01 |
| B035DRAFT_00571 | Mg chelatase-related protein                                                                      | 52.4   | 58.2   | 53.4   | 67.0   | 61.9   | 51.6   | 1.10 | 5.5E-01 |
| B035DRAFT_00572 | AhpC/TSA family                                                                                   | 83.5   | 71.1   | 75.0   | 71.3   | 71.3   | 58.9   | 0.88 | 3.7E-01 |
| B035DRAFT_00573 | hypothetical protein                                                                              | 2133.4 | 2336.8 | 2081.4 | 1528.2 | 1838.3 | 2329.9 | 0.86 | 5.0E-01 |
| B035DRAFT_00574 | tyrosine recombinase XerD                                                                         | 14.8   | 14.4   | 14.0   | 11.9   | 11.9   | 11.6   | 0.82 | 1.1E-02 |
| B035DRAFT_00575 | 3-dehydroquininate dehydratase, type II( EC:4.2.1.10 )                                            | 177.7  | 145.3  | 129.3  | 92.9   | 136.8  | 103.1  | 0.73 | 2.8E-01 |
| B035DRAFT_00576 | pyruvate kinase( EC:2.7.1.40 )                                                                    | 386.2  | 363.6  | 339.6  | 280.2  | 348.7  | 311.0  | 0.86 | 2.9E-01 |
| B035DRAFT_00577 | Predicted O-methyltransferase                                                                     | 297.1  | 281.5  | 259.3  | 234.6  | 278.2  | 253.9  | 0.91 | 4.4E-01 |
| B035DRAFT_00578 | ribosome-binding factor A                                                                         | 337.8  | 344.8  | 313.8  | 273.1  | 321.3  | 339.9  | 0.93 | 6.0E-01 |
| B035DRAFT_00579 | ABC-type transport system, involved in lipoprotein release, permease component                    | 353.6  | 320.0  | 351.1  | 255.1  | 295.0  | 260.0  | 0.79 | 8.6E-02 |
| B035DRAFT_00580 | Pyridoxal/pyridoxine/pyridoxamine kinase( EC:2.7.1.35 )                                           | 148.7  | 142.2  | 148.6  | 138.1  | 134.8  | 136.5  | 0.93 | 8.2E-02 |
| B035DRAFT_00581 | glutamate racemase( EC:5.1.1.3 )                                                                  | 85.8   | 85.5   | 89.5   | 80.2   | 74.9   | 98.1   | 0.97 | 8.2E-01 |
| B035DRAFT_00582 | Outer membrane protein                                                                            | 1374.8 | 1477.8 | 1349.6 | 1718.3 | 1429.8 | 1682.0 | 1.15 | 2.8E-01 |
| B035DRAFT_00583 | Outer membrane protein                                                                            | 326.7  | 339.1  | 302.0  | 369.8  | 386.7  | 414.7  | 1.21 | 9.5E-02 |
| B035DRAFT_00584 | outer membrane protein assembly complex, YaeT protein                                             | 636.0  | 634.6  | 606.0  | 657.3  | 695.4  | 729.2  | 1.11 | 1.6E-01 |
| B035DRAFT_00585 | undecaprenyl diphosphate synthase( EC:2.5.1.31 )                                                  | 438.7  | 461.9  | 431.9  | 492.2  | 485.5  | 457.0  | 1.08 | 2.3E-01 |
| B035DRAFT_00586 | hypothetical protein                                                                              | 513.4  | 553.6  | 514.7  | 527.3  | 495.9  | 543.6  | 0.99 | 9.0E-01 |
| B035DRAFT_00587 | riboflavin biosynthesis protein RibD( EC:1.1.1.193,EC:3.5.4.26 )                                  | 28.0   | 28.5   | 30.8   | 39.3   | 42.5   | 40.8   | 1.41 | 1.7E-02 |
| B035DRAFT_00588 | protein-(glutamine-N5) methyltransferase, release factor-specific( EC:2.1.1.)                     | 67.4   | 70.1   | 72.9   | 72.9   | 73.2   | 64.4   | 1.00 | 9.9E-01 |
| B035DRAFT_00589 | Uncharacterized protein conserved in bacteria                                                     | 44.1   | 40.8   | 43.1   | 26.0   | 48.8   | 31.6   | 0.80 | 5.1E-01 |
| B035DRAFT_00590 | Predicted amidophosphoribosyltransferases                                                         | 60.6   | 65.5   | 67.1   | 49.1   | 59.5   | 47.7   | 0.81 | 1.8E-01 |
| B035DRAFT_00591 | orotate phosphoribosyltransferase( EC:2.4.2.10 )                                                  | 1240.4 | 1408.3 | 1372.3 | 1308.8 | 1318.0 | 1419.7 | 1.01 | 9.4E-01 |
| B035DRAFT_00592 | Polyketide cyclase / dehydrase and lipid transport.                                               | 208.2  | 259.5  | 233.5  | 168.6  | 217.8  | 202.2  | 0.84 | 3.4E-01 |
| B035DRAFT_00593 | argininosuccinate lyase( EC:4.3.2.1 )                                                             | 259.9  | 264.0  | 267.6  | 195.2  | 234.1  | 197.6  | 0.79 | 9.5E-02 |
| B035DRAFT_00594 | Predicted oxidoreductases (related to aryl-alcohol dehydrogenases)                                | 295.7  | 277.4  | 303.7  | 236.6  | 238.7  | 180.6  | 0.74 | 1.5E-01 |
| B035DRAFT_00595 | ( tRNA )                                                                                          | 0.0    | 0.0    | 0.0    | 0.0    | 0.0    | 0.0    | 0.00 |         |
| B035DRAFT_00596 | ( tRNA )                                                                                          | 324.4  | 426.2  | 577.0  | 375.9  | 189.7  | 104.7  | 0.45 | 3.1E-01 |

|                 |                                                                                                     |        |        |        |        |        |        |  |      |         |
|-----------------|-----------------------------------------------------------------------------------------------------|--------|--------|--------|--------|--------|--------|--|------|---------|
| B035DRAFT_00597 | Fic/DOC family                                                                                      | 385.2  | 417.7  | 442.3  | 425.7  | 399.6  | 450.5  |  | 1.02 | 8.1E-01 |
| B035DRAFT_00598 | hypothetical protein                                                                                | 148.2  | 185.3  | 165.2  | 112.0  | 126.5  | 150.5  |  | 0.78 | 2.4E-01 |
| B035DRAFT_00599 | hypothetical protein                                                                                | 133.1  | 149.4  | 145.8  | 137.4  | 137.2  | 172.0  |  | 1.04 | 8.1E-01 |
| B035DRAFT_00600 | Predicted P-loop ATPase and inactivated derivatives                                                 | 103.9  | 79.2   | 107.9  | 76.0   | 69.5   | 28.6   |  | 0.55 | 3.4E-01 |
| B035DRAFT_00601 | hypothetical protein                                                                                | 19.3   | 26.2   | 5.9    | 5.1    | 8.8    | 5.8    |  | 0.44 | 3.7E-01 |
| B035DRAFT_00602 | RNA polymerase sigma-70 factor, Bacteroides expansion family 1                                      | 30.6   | 36.7   | 21.8   | 15.3   | 22.7   | 25.0   |  | 0.71 | 3.8E-01 |
| B035DRAFT_00603 | Fe2+-dicitrate sensor, membrane component                                                           | 31.9   | 30.0   | 35.4   | 11.1   | 16.2   | 15.1   |  | 0.43 | 3.5E-02 |
| B035DRAFT_00604 | TonB-linked outer membrane protein, SusC/RagA family                                                | 66.6   | 57.6   | 59.3   | 28.2   | 32.4   | 39.0   |  | 0.54 | 4.4E-02 |
| B035DRAFT_00605 | SusD family                                                                                         | 63.5   | 55.5   | 60.9   | 29.8   | 32.5   | 36.5   |  | 0.55 | 2.1E-02 |
| B035DRAFT_00606 | Glycoside hydrolase (GH110)                                                                         | 217.9  | 221.8  | 215.1  | 215.5  | 217.2  | 200.8  |  | 0.97 | 4.8E-01 |
| B035DRAFT_00607 | Glycoside hydrolase (GH109)                                                                         | 1186.8 | 1170.3 | 1124.7 | 967.4  | 1179.7 | 1209.3 |  | 0.96 | 7.6E-01 |
| B035DRAFT_00608 | 5"-nucleotidase/2",3"-cyclic phosphodiesterase and related esterases                                | 29.1   | 31.6   | 25.4   | 23.7   | 27.2   | 29.2   |  | 0.93 | 6.6E-01 |
| B035DRAFT_00609 | Outer membrane cobalamin receptor protein                                                           | 830.6  | 782.3  | 624.6  | 358.0  | 397.6  | 300.1  |  | 0.47 | 4.0E-02 |
| B035DRAFT_00610 | hypothetical protein                                                                                | 2185.2 | 1766.0 | 1499.2 | 613.8  | 939.3  | 490.5  |  | 0.37 | 7.5E-02 |
| B035DRAFT_00611 | Uncharacterized iron-regulated membrane protein                                                     | 1849.4 | 1544.5 | 1510.2 | 490.3  | 662.3  | 332.2  |  | 0.29 | 4.5E-02 |
| B035DRAFT_00612 | Mg2+ and Co2+ transporters                                                                          | 348.3  | 339.4  | 287.6  | 138.2  | 190.7  | 176.8  |  | 0.52 | 4.7E-02 |
| B035DRAFT_00613 | peroxiredoxin( EC:1.11.1.15 )                                                                       | 7030.7 | 4328.3 | 2588.5 | 3234.7 | 2097.1 | 3525.3 |  | 0.67 | 5.1E-01 |
| B035DRAFT_00614 | hypothetical protein                                                                                | 1986.1 | 1526.3 | 1055.6 | 1265.0 | 734.9  | 1717.3 |  | 0.79 | 6.8E-01 |
| B035DRAFT_00615 | N-acetylglucosamine-6-phosphate deacetylase( EC:3.5.1.25 ) (CE9)                                    | 182.6  | 214.1  | 214.7  | 211.1  | 226.5  | 208.9  |  | 1.06 | 5.9E-01 |
| B035DRAFT_00616 | Sua5/YciO/YrdC/YwiC family protein                                                                  | 134.6  | 123.8  | 126.3  | 139.5  | 138.8  | 106.9  |  | 0.99 | 9.8E-01 |
| B035DRAFT_00617 | Chloride channel protein EriC                                                                       | 109.6  | 108.9  | 113.1  | 106.7  | 120.5  | 120.2  |  | 1.05 | 5.5E-01 |
| B035DRAFT_00618 | methionyl-tRNA formyltransferase( EC:2.1.2.9 )                                                      | 153.9  | 138.6  | 150.5  | 146.3  | 153.3  | 119.2  |  | 0.94 | 6.9E-01 |
| B035DRAFT_00619 | hypothetical protein                                                                                | 14.2   | 19.2   | 19.3   | 47.6   | 42.6   | 56.3   |  | 2.79 | 2.3E-02 |
| B035DRAFT_00620 | RNA polymerase sigma factor, sigma-70 family                                                        | 46.4   | 49.5   | 37.9   | 75.3   | 72.2   | 60.5   |  | 1.56 | 8.6E-02 |
| B035DRAFT_00621 | hypothetical protein                                                                                | 42.2   | 37.2   | 40.1   | 67.0   | 68.4   | 68.0   |  | 1.70 | 4.4E-03 |
| B035DRAFT_00622 | ribulose-phosphate 3-epimerase( EC:5.1.3.1 )                                                        | 219.8  | 227.3  | 193.6  | 231.7  | 264.3  | 236.2  |  | 1.14 | 2.8E-01 |
| B035DRAFT_00623 | ComEC/Rec2-related protein                                                                          | 45.6   | 43.0   | 43.0   | 46.8   | 57.5   | 48.8   |  | 1.16 | 2.5E-01 |
| B035DRAFT_00624 | Exopolyphosphatase-related proteins                                                                 | 260.1  | 250.7  | 245.6  | 207.4  | 252.1  | 271.5  |  | 0.96 | 8.0E-01 |
| B035DRAFT_00625 | hypothetical protein                                                                                | 810.0  | 832.6  | 798.1  | 930.5  | 920.4  | 864.6  |  | 1.11 | 9.1E-02 |
| B035DRAFT_00626 | phosphoglucosamine mutase( EC:5.4.2.8 )                                                             | 913.8  | 947.9  | 954.4  | 924.2  | 1074.6 | 1029.9 |  | 1.07 | 4.1E-01 |
| B035DRAFT_00627 | Beta-glucanase/Beta-glucan synthetase (GH16)                                                        | 207.5  | 204.8  | 201.1  | 216.9  | 213.3  | 190.0  |  | 1.01 | 9.2E-01 |
| B035DRAFT_00628 | putative oxygen-independent coproporphyrinogen III oxidase( EC:1.3.99.22 )                          | 153.3  | 164.2  | 169.8  | 178.8  | 175.1  | 176.5  |  | 1.09 | 1.8E-01 |
| B035DRAFT_00629 | small GTP-binding protein domain                                                                    | 90.3   | 91.5   | 89.3   | 93.8   | 132.8  | 156.4  |  | 1.38 | 2.7E-01 |
| B035DRAFT_00630 | Signal transduction histidine kinase( EC:2.7.13.3 )                                                 | 600.0  | 642.0  | 618.2  | 572.9  | 527.8  | 486.7  |  | 0.85 | 1.5E-01 |
| B035DRAFT_00631 | Response regulators consisting of a CheY-like receiver domain and a winged-helix DNA-binding domain | 2529.5 | 2988.7 | 2988.6 | 3062.7 | 2419.4 | 3162.5 |  | 1.01 | 9.5E-01 |
| B035DRAFT_00632 | Site-specific recombinase XerD                                                                      | 104.2  | 103.9  | 103.3  | 110.8  | 112.5  | 129.7  |  | 1.13 | 2.2E-01 |
| B035DRAFT_00633 | Transcription antiterminator                                                                        | 106.9  | 130.2  | 88.3   | 65.6   | 74.1   | 75.5   |  | 0.67 | 1.4E-01 |
| B035DRAFT_00634 | Periplasmic protein involved in polysaccharide export                                               | 132.3  | 150.4  | 127.6  | 73.5   | 111.9  | 71.6   |  | 0.61 | 1.5E-01 |
| B035DRAFT_00635 | capsular exopolysaccharide family                                                                   | 130.9  | 143.2  | 136.9  | 103.3  | 119.6  | 105.6  |  | 0.80 | 8.3E-02 |
| B035DRAFT_00636 | Capsular polysaccharide biosynthesis protein                                                        | 112.4  | 112.0  | 104.8  | 69.3   | 88.5   | 79.6   |  | 0.72 | 7.9E-02 |
| B035DRAFT_00637 | hypothetical protein                                                                                | 105.2  | 108.5  | 107.1  | 68.1   | 86.9   | 84.8   |  | 0.74 | 1.1E-01 |
| B035DRAFT_00638 | Glycosyltransferase (GT4)                                                                           | 91.3   | 93.3   | 94.1   | 60.4   | 70.7   | 74.6   |  | 0.74 | 6.8E-02 |
| B035DRAFT_00639 | Glycosyltransferase (GT4)                                                                           | 115.3  | 117.4  | 119.3  | 71.5   | 86.8   | 66.3   |  | 0.63 | 5.0E-02 |
| B035DRAFT_00640 | Glycosyltransferases involved in cell wall biogenesis (GT2)                                         | 82.1   | 82.7   | 69.8   | 41.7   | 67.9   | 55.2   |  | 0.69 | 2.3E-01 |
| B035DRAFT_00641 | hypothetical protein                                                                                | 75.7   | 83.6   | 71.2   | 46.2   | 65.2   | 59.5   |  | 0.74 | 1.9E-01 |
| B035DRAFT_00642 | hypothetical protein                                                                                | 76.8   | 81.9   | 72.5   | 41.9   | 63.9   | 62.0   |  | 0.71 | 2.3E-01 |
| B035DRAFT_00643 | Uncharacterized protein conserved in bacteria                                                       | 74.3   | 82.6   | 68.5   | 46.0   | 58.5   | 63.6   |  | 0.74 | 1.9E-01 |
| B035DRAFT_00644 | Glycosyltransferase (GT4)                                                                           | 88.6   | 101.8  | 96.4   | 68.6   | 74.9   | 73.0   |  | 0.76 | 4.6E-02 |
| B035DRAFT_00645 | hypothetical protein                                                                                | 91.8   | 106.0  | 90.3   | 53.1   | 74.0   | 87.9   |  | 0.73 | 3.0E-01 |

|                 |                                                                                                          |        |        |        |        |        |        |      |         |
|-----------------|----------------------------------------------------------------------------------------------------------|--------|--------|--------|--------|--------|--------|------|---------|
| B035DRAFT_00646 | Mannosyltransferase OCH1 and related enzymes (GT32)                                                      | 107.2  | 117.0  | 129.6  | 69.0   | 84.8   | 84.0   | 0.67 | 7.4E-02 |
| B035DRAFT_00647 | Glycosyltransferases, probably involved in cell wall biogenesis (GT2)                                    | 85.0   | 86.0   | 81.6   | 52.8   | 64.4   | 54.4   | 0.68 | 4.2E-02 |
| B035DRAFT_00648 | Glycosyltransferase (GT4)                                                                                | 87.3   | 86.4   | 78.2   | 60.0   | 69.1   | 56.7   | 0.74 | 7.7E-02 |
| B035DRAFT_00649 | Phd_YefM.                                                                                                | 265.6  | 268.7  | 239.4  | 315.2  | 332.7  | 269.1  | 1.18 | 2.5E-01 |
| B035DRAFT_00650 | toxin-antitoxin system, toxin component, Txe/YoeB family                                                 | 269.3  | 259.7  | 239.8  | 322.8  | 334.5  | 280.3  | 1.22 | 1.6E-01 |
| B035DRAFT_00651 | hypothetical protein                                                                                     | 498.4  | 490.0  | 488.0  | 684.1  | 639.4  | 811.2  | 1.44 | 6.1E-02 |
| B035DRAFT_00652 | hypothetical protein                                                                                     | 429.6  | 475.5  | 489.1  | 575.6  | 545.4  | 740.6  | 1.33 | 1.9E-01 |
| B035DRAFT_00653 | hypothetical protein                                                                                     | 285.4  | 293.6  | 325.5  | 332.6  | 344.5  | 391.6  | 1.18 | 2.0E-01 |
| B035DRAFT_00654 | Negative regulator of beta-lactamase expression                                                          | 194.9  | 161.1  | 184.8  | 202.8  | 177.3  | 96.3   | 0.84 | 6.9E-01 |
| B035DRAFT_00655 | hypothetical protein                                                                                     | 168.9  | 157.1  | 164.4  | 181.2  | 156.0  | 119.9  | 0.92 | 7.1E-01 |
| B035DRAFT_00656 | DNA-binding protein, histone-like, putative                                                              | 176.8  | 163.2  | 196.9  | 150.4  | 143.1  | 80.0   | 0.67 | 3.2E-01 |
| B035DRAFT_00657 | hypothetical protein                                                                                     | 223.8  | 200.5  | 225.3  | 178.6  | 163.3  | 86.4   | 0.63 | 3.0E-01 |
| B035DRAFT_00658 | DNA primase (bacterial type)                                                                             | 169.6  | 121.1  | 189.3  | 121.9  | 91.0   | 24.3   | 0.41 | 3.5E-01 |
| B035DRAFT_00659 | hypothetical protein                                                                                     | 69.2   | 69.4   | 72.4   | 52.9   | 55.1   | 41.3   | 0.70 | 1.0E-01 |
| B035DRAFT_00660 | hypothetical protein                                                                                     | 57.4   | 64.2   | 64.5   | 39.5   | 42.0   | 37.1   | 0.64 | 2.0E-02 |
| B035DRAFT_00661 | hypothetical protein                                                                                     | 37.0   | 56.8   | 43.3   | 37.4   | 36.3   | 35.0   | 0.81 | 3.6E-01 |
| B035DRAFT_00662 | Nucleoside-diphosphate-sugar epimerases( EC:5.1.3.2 )                                                    | 74.2   | 82.4   | 74.2   | 49.1   | 62.6   | 67.5   | 0.77 | 2.1E-01 |
| B035DRAFT_00663 | Sugar transferases involved in lipopolysaccharide synthesis                                              | 53.6   | 54.3   | 48.7   | 41.9   | 49.6   | 50.7   | 0.91 | 4.3E-01 |
| B035DRAFT_00664 | hypothetical protein                                                                                     | 76.1   | 80.7   | 77.1   | 56.7   | 67.1   | 78.9   | 0.86 | 3.9E-01 |
| B035DRAFT_00665 | hypothetical protein                                                                                     | 91.6   | 95.9   | 91.9   | 73.6   | 74.8   | 92.8   | 0.86 | 3.0E-01 |
| B035DRAFT_00666 | hypothetical protein                                                                                     | 70.1   | 74.3   | 63.3   | 47.3   | 55.6   | 67.2   | 0.81 | 3.2E-01 |
| B035DRAFT_00667 | Aldo/keto reductases, related to diketogulonate reductase                                                | 72.3   | 70.5   | 75.1   | 55.1   | 61.6   | 76.1   | 0.88 | 4.5E-01 |
| B035DRAFT_00668 | Diaminopimelate decarboxylase( EC:4.1.1.20 )                                                             | 60.8   | 66.3   | 67.8   | 55.0   | 60.1   | 59.8   | 0.90 | 2.2E-01 |
| B035DRAFT_00669 | Carbamoylphosphate synthase large subunit (split gene in MJ)( EC:6.3.5.5 )                               | 65.2   | 70.9   | 58.9   | 46.6   | 62.3   | 62.9   | 0.87 | 5.1E-01 |
| B035DRAFT_00670 | Predicted pyridoxal phosphate-dependent enzyme apparently involved in regulation of cell wall biogenesis | 71.1   | 56.8   | 68.2   | 49.9   | 52.3   | 27.6   | 0.64 | 2.9E-01 |
| B035DRAFT_00671 | Predicted nucleoside-diphosphate sugar epimerases                                                        | 66.6   | 53.3   | 60.3   | 44.7   | 56.4   | 28.4   | 0.69 | 3.5E-01 |
| B035DRAFT_00672 | Bacterial putative lipoprotein (DUF940).                                                                 | 63.9   | 46.3   | 53.0   | 40.9   | 47.3   | 12.1   | 0.53 | 4.3E-01 |
| B035DRAFT_00673 | Bacterial putative lipoprotein (DUF940).                                                                 | 54.7   | 46.2   | 52.7   | 36.5   | 51.2   | 17.9   | 0.63 | 4.2E-01 |
| B035DRAFT_00674 | hypothetical protein                                                                                     | 260.1  | 232.0  | 235.6  | 171.1  | 189.6  | 102.7  | 0.62 | 2.2E-01 |
| B035DRAFT_00675 | Site-specific recombinase XerD                                                                           | 14.3   | 16.1   | 14.0   | 11.7   | 10.2   | 11.2   | 0.75 | 6.4E-02 |
| B035DRAFT_00676 | Protein of unknown function (DUF1812).                                                                   | 33.0   | 35.8   | 39.9   | 27.6   | 25.4   | 19.1   | 0.66 | 1.3E-01 |
| B035DRAFT_00677 | Protein of unknown function (DUF1812).                                                                   | 16.1   | 12.4   | 15.2   | 14.0   | 13.8   | 11.8   | 0.91 | 5.9E-01 |
| B035DRAFT_00678 | Outer membrane protein and related peptidoglycan-associated (lipo)proteins                               | 8.9    | 8.6    | 12.4   | 6.2    | 5.6    | 4.1    | 0.53 | 1.1E-01 |
| B035DRAFT_00679 | Protein of unknown function (DUF3575).                                                                   | 11.2   | 5.8    | 11.8   | 5.3    | 6.4    | 4.0    | 0.56 | 2.6E-01 |
| B035DRAFT_00680 | hypothetical protein                                                                                     | 9.0    | 6.2    | 9.9    | 6.6    | 6.8    | 5.1    | 0.74 | 3.5E-01 |
| B035DRAFT_00681 | Protein of unknown function (DUF3575).                                                                   | 12.8   | 9.0    | 10.5   | 8.8    | 8.4    | 8.1    | 0.79 | 2.5E-01 |
| B035DRAFT_00682 | Site-specific recombinase XerD                                                                           | 37.1   | 39.9   | 40.2   | 45.7   | 32.8   | 36.6   | 0.97 | 8.9E-01 |
| B035DRAFT_00683 | hypothetical protein                                                                                     | 720.0  | 1347.7 | 1203.0 | 1207.9 | 1062.7 | 1623.3 | 1.21 | 6.4E-01 |
| B035DRAFT_00684 | Transcriptional regulators                                                                               | 187.8  | 213.5  | 169.7  | 162.3  | 156.2  | 159.7  | 0.84 | 2.1E-01 |
| B035DRAFT_00685 | ribosomal protein S6                                                                                     | 3304.0 | 3576.1 | 2958.2 | 2875.1 | 3162.9 | 3348.6 | 0.96 | 7.3E-01 |
| B035DRAFT_00686 | ribosomal protein S18                                                                                    | 3743.2 | 3924.4 | 3582.0 | 3270.0 | 3684.7 | 4159.9 | 0.98 | 9.2E-01 |
| B035DRAFT_00687 | ribosomal protein L9                                                                                     | 3439.0 | 3746.8 | 3562.0 | 3263.3 | 3507.4 | 4061.4 | 1.00 | 9.8E-01 |
| B035DRAFT_00688 | hypothetical protein                                                                                     | 143.5  | 135.0  | 125.0  | 179.8  | 198.0  | 192.1  | 1.41 | 3.1E-02 |
| B035DRAFT_00689 | hypothetical protein                                                                                     | 3251.3 | 4898.2 | 4349.9 | 2654.8 | 1935.7 | 2115.2 | 0.54 | 9.4E-02 |
| B035DRAFT_00690 | Long-chain acyl-CoA synthetases (AMP-forming)( EC:6.2.1.3 )                                              | 120.7  | 138.4  | 107.4  | 113.8  | 130.1  | 134.6  | 1.04 | 8.4E-01 |
| B035DRAFT_00691 | MiaB-like tRNA modifying enzyme                                                                          | 163.5  | 131.8  | 124.7  | 137.0  | 182.7  | 101.6  | 0.98 | 9.6E-01 |
| B035DRAFT_00692 | Predicted glycosyltransferases (GT27)                                                                    | 158.6  | 129.6  | 119.3  | 119.6  | 187.4  | 124.1  | 1.04 | 9.0E-01 |
| B035DRAFT_00693 | Methylglyoxal synthase( EC:4.2.3.3 )                                                                     | 234.9  | 216.2  | 233.4  | 279.4  | 317.6  | 274.3  | 1.27 | 7.7E-02 |

|                 |                                                                                                 |        |        |        |        |        |        |      |         |
|-----------------|-------------------------------------------------------------------------------------------------|--------|--------|--------|--------|--------|--------|------|---------|
| B035DRAFT_00694 | dihydroneopterin aldolase( EC:4.1.2.25 )                                                        | 107.6  | 110.7  | 97.5   | 115.7  | 118.3  | 111.5  | 1.10 | 2.7E-01 |
| B035DRAFT_00695 | ribonucleoside-diphosphate reductase, adenosylcobalamin-dependent( EC:1.17.4.1 )                | 827.7  | 803.2  | 693.3  | 638.5  | 612.2  | 617.7  | 0.81 | 1.0E-01 |
| B035DRAFT_00696 | hypothetical protein                                                                            | 12.2   | 3.5    | 3.7    | 11.2   | 8.3    | 2.8    | 1.17 | 8.9E-01 |
| B035DRAFT_00697 | Nitroreductase                                                                                  | 261.0  | 259.7  | 204.2  | 250.3  | 269.7  | 288.8  | 1.12 | 4.9E-01 |
| B035DRAFT_00698 | chromosomal replication initiator protein DnaA                                                  | 495.3  | 587.7  | 540.7  | 635.2  | 645.2  | 707.6  | 1.23 | 1.3E-01 |
| B035DRAFT_00699 | ABC-type transport system involved in resistance to organic solvents, periplasmic component     | 75.3   | 83.4   | 71.8   | 80.3   | 84.0   | 86.3   | 1.09 | 3.5E-01 |
| B035DRAFT_00700 | N-acetylmuramoyl-L-alanine amidase( EC:3.5.1.28 )                                               | 39.3   | 42.5   | 38.2   | 48.9   | 44.4   | 44.6   | 1.15 | 1.6E-01 |
| B035DRAFT_00701 | Predicted Na <sup>+</sup> -dependent transporter                                                | 14.2   | 14.5   | 15.3   | 12.3   | 13.8   | 12.3   | 0.87 | 1.7E-01 |
| B035DRAFT_00702 | Acetyltransferases( EC:2.3.1.)                                                                  | 47.4   | 63.9   | 58.9   | 31.2   | 37.6   | 41.3   | 0.65 | 1.2E-01 |
| B035DRAFT_00703 | cytidine deaminase, homotetrameric( EC:3.5.4.5 )                                                | 92.3   | 122.2  | 108.1  | 172.9  | 144.3  | 157.8  | 1.48 | 9.3E-02 |
| B035DRAFT_00704 | RNA polymerase sigma-70 factor, Bacteroides expansion family 1                                  | 16.4   | 21.0   | 16.5   | 15.5   | 14.1   | 12.6   | 0.79 | 2.3E-01 |
| B035DRAFT_00705 | Fe <sup>2+</sup> -dicitrate sensor, membrane component                                          | 16.3   | 14.9   | 17.8   | 14.0   | 15.0   | 13.9   | 0.88 | 2.4E-01 |
| B035DRAFT_00706 | TonB-linked outer membrane protein, SusC/RagA family                                            | 12.3   | 11.4   | 12.7   | 9.7    | 11.2   | 12.8   | 0.92 | 6.0E-01 |
| B035DRAFT_00707 | SusD family                                                                                     | 11.8   | 10.6   | 11.1   | 11.7   | 13.9   | 14.1   | 1.18 | 2.3E-01 |
| B035DRAFT_00708 | Arylsulfatase A and related enzymes( EC:3.1.6.1 )                                               | 9.4    | 9.7    | 9.2    | 6.2    | 8.7    | 12.3   | 0.92 | 8.4E-01 |
| B035DRAFT_00709 | Arylsulfatase A and related enzymes                                                             | 15.3   | 17.2   | 17.1   | 15.8   | 19.2   | 15.4   | 1.01 | 9.4E-01 |
| B035DRAFT_00710 | hypothetical protein                                                                            | 41.9   | 48.1   | 44.3   | 65.6   | 66.4   | 72.7   | 1.53 | 2.2E-02 |
| B035DRAFT_00711 | RNA polymerase sigma factor, sigma-70 family                                                    | 83.0   | 79.0   | 84.2   | 130.1  | 136.6  | 124.9  | 1.59 | 4.3E-03 |
| B035DRAFT_00712 | hypothetical protein                                                                            | 126.6  | 115.8  | 117.8  | 158.7  | 173.0  | 150.1  | 1.34 | 4.5E-02 |
| B035DRAFT_00713 | hypothetical protein                                                                            | 443.6  | 405.6  | 363.6  | 669.5  | 646.3  | 737.8  | 1.70 | 2.6E-02 |
| B035DRAFT_00714 | N-acetyl-beta-hexosaminidase( EC:3.2.1.52 ) (GH20)                                              | 216.1  | 235.0  | 221.0  | 249.2  | 268.0  | 316.4  | 1.23 | 1.8E-01 |
| B035DRAFT_00715 | hypothetical protein (CBM9)                                                                     | 168.9  | 156.9  | 156.6  | 175.9  | 203.7  | 187.0  | 1.17 | 1.5E-01 |
| B035DRAFT_00716 | Uncharacterized conserved protein                                                               | 228.0  | 249.5  | 240.6  | 261.6  | 316.4  | 306.8  | 1.23 | 1.5E-01 |
| B035DRAFT_00717 | Zn-dependent protease with chaperone function( EC:3.4.24.)                                      | 214.6  | 224.0  | 218.5  | 217.0  | 251.7  | 273.4  | 1.12 | 3.6E-01 |
| B035DRAFT_00718 | Muramidase (flagellum-specific) (GH73)                                                          | 140.0  | 150.5  | 144.6  | 121.5  | 145.4  | 143.4  | 0.94 | 5.8E-01 |
| B035DRAFT_00719 | Multidrug resistance efflux pump                                                                | 15.6   | 12.4   | 14.2   | 49.4   | 81.8   | 66.9   | 4.62 | 1.6E-02 |
| B035DRAFT_00720 | ABC-type antimicrobial peptide transport system, permease component                             | 17.5   | 17.5   | 16.1   | 51.2   | 68.1   | 82.6   | 3.89 | 1.6E-02 |
| B035DRAFT_00721 | ABC-type antimicrobial peptide transport system, permease component                             | 16.5   | 16.3   | 20.5   | 62.1   | 71.1   | 80.1   | 4.01 | 5.8E-03 |
| B035DRAFT_00722 | ABC-type antimicrobial peptide transport system, ATPase component                               | 39.2   | 39.4   | 41.0   | 131.0  | 154.7  | 143.5  | 3.58 | 5.6E-04 |
| B035DRAFT_00723 | ABC-type antimicrobial peptide transport system, permease component                             | 39.0   | 37.3   | 37.4   | 134.7  | 128.5  | 122.0  | 3.39 | 1.3E-04 |
| B035DRAFT_00724 | ABC-type antimicrobial peptide transport system, permease component                             | 71.5   | 62.5   | 71.2   | 265.3  | 256.4  | 237.4  | 3.70 | 7.1E-04 |
| B035DRAFT_00725 | Outer membrane protein                                                                          | 18.5   | 18.5   | 16.4   | 71.2   | 87.3   | 87.8   | 4.60 | 1.5E-03 |
| B035DRAFT_00726 | Response regulator containing CheY-like receiver, AAA-type ATPase, and DNA-binding domains      | 130.6  | 132.6  | 137.0  | 226.0  | 222.9  | 141.6  | 1.44 | 2.3E-01 |
| B035DRAFT_00727 | HAMP domain./Histidine kinase-, DNA gyrase B-, and HSP90-like ATPase.                           | 64.7   | 66.7   | 69.9   | 97.7   | 119.6  | 110.5  | 1.62 | 2.6E-02 |
| B035DRAFT_00728 | Predicted soluble lytic transglycosylase fused to an ABC-type amino acid-binding protein (GH23) | 29.3   | 31.9   | 31.3   | 49.7   | 52.9   | 43.4   | 1.57 | 3.1E-02 |
| B035DRAFT_00729 | uridine kinase( EC:2.7.1.48 )                                                                   | 54.9   | 51.0   | 47.4   | 81.1   | 85.8   | 94.1   | 1.70 | 2.0E-02 |
| B035DRAFT_00730 | Stress responsive A/B Barrel Domain.                                                            | 180.2  | 195.1  | 152.1  | 217.5  | 225.6  | 220.6  | 1.27 | 1.5E-01 |
| B035DRAFT_00731 | Uncharacterized protein, possibly involved in aromatic compounds catabolism                     | 162.7  | 172.8  | 171.7  | 177.1  | 183.9  | 159.5  | 1.02 | 7.8E-01 |
| B035DRAFT_00732 | ATP phosphoribosyltransferase( EC:2.4.2.17 )                                                    | 92.0   | 83.9   | 70.0   | 51.8   | 64.9   | 59.5   | 0.72 | 1.5E-01 |
| B035DRAFT_00733 | histidinol dehydrogenase( EC:1.1.1.23 )                                                         | 70.8   | 64.2   | 65.0   | 54.6   | 58.2   | 38.8   | 0.75 | 2.5E-01 |
| B035DRAFT_00734 | histidinol-phosphate aminotransferase( EC:2.6.1.9 )                                             | 65.5   | 66.2   | 66.4   | 48.3   | 61.9   | 54.4   | 0.83 | 2.0E-01 |
| B035DRAFT_00735 | histidinol-phosphatase( EC:3.1.3.15,EC:4.2.1.19 )                                               | 65.2   | 76.3   | 73.1   | 55.9   | 62.4   | 40.9   | 0.73 | 2.4E-01 |
| B035DRAFT_00736 | NAD <sup>+</sup> synthetase( EC:6.3.5.1 )                                                       | 60.0   | 76.3   | 70.2   | 75.4   | 86.7   | 81.1   | 1.18 | 2.9E-01 |
| B035DRAFT_00737 | Fe <sup>2+</sup> /Zn <sup>2+</sup> uptake regulation proteins                                   | 934.4  | 940.2  | 616.2  | 915.7  | 411.2  | 1103.3 | 0.92 | 8.9E-01 |
| B035DRAFT_00738 | Rubryerythrin                                                                                   | 4047.7 | 3443.8 | 2320.3 | 3043.0 | 1823.9 | 3190.6 | 0.82 | 6.5E-01 |
| B035DRAFT_00739 | thioredoxin                                                                                     | 128.0  | 111.7  | 69.9   | 100.6  | 63.4   | 132.8  | 0.95 | 9.2E-01 |



|                 |                                                                            |       |       |       |       |       |       |      |         |
|-----------------|----------------------------------------------------------------------------|-------|-------|-------|-------|-------|-------|------|---------|
| B035DRAFT_00740 | hypothetical protein                                                       | 6.1   | 3.2   | 3.3   | 2.9   | 4.3   | 3.1   | 0.84 | 7.1E-01 |
| B035DRAFT_00741 | Predicted transcriptional regulator                                        | 42.7  | 53.5  | 37.9  | 48.4  | 44.5  | 65.9  | 1.18 | 5.6E-01 |
| B035DRAFT_00742 | hypothetical protein                                                       | 10.9  | 1.1   | 0.0   | 4.8   | 4.9   | 5.0   | 1.44 | 8.8E-01 |
| B035DRAFT_00743 | hypothetical protein                                                       | 6.2   | 7.2   | 3.8   | 2.4   | 7.0   | 3.5   | 0.71 | 6.1E-01 |
| B035DRAFT_00744 | hypothetical protein                                                       | 4.6   | 8.2   | 7.6   | 7.4   | 8.6   | 7.9   | 1.22 | 5.7E-01 |
| B035DRAFT_00745 | Integrase core domain.                                                     | 4.6   | 4.4   | 4.3   | 2.7   | 3.0   | 2.0   | 0.57 | 7.6E-02 |
| B035DRAFT_00746 | Uncharacterized ATPase, putative transposase                               | 6.8   | 5.9   | 5.0   | 2.2   | 3.3   | 2.1   | 0.43 | 6.4E-02 |
| B035DRAFT_00747 | hypothetical protein                                                       | 7.6   | 5.3   | 9.7   | 5.6   | 6.2   | 2.4   | 0.60 | 4.2E-01 |
| B035DRAFT_00748 | hypothetical protein                                                       | 19.9  | 12.4  | 25.7  | 17.0  | 8.6   | 5.8   | 0.51 | 3.5E-01 |
| B035DRAFT_00749 | hypothetical protein                                                       | 5.2   | 6.9   | 5.4   | 5.5   | 3.4   | 3.4   | 0.68 | 2.9E-01 |
| B035DRAFT_00750 | Protein of unknown function (DUF2786).                                     | 9.3   | 9.1   | 12.4  | 7.3   | 7.8   | 6.9   | 0.72 | 1.5E-01 |
| B035DRAFT_00751 | hypothetical protein                                                       | 11.7  | 8.5   | 8.9   | 9.2   | 7.3   | 8.6   | 0.87 | 5.2E-01 |
| B035DRAFT_00752 | hypothetical protein                                                       | 15.6  | 5.8   | 9.9   | 7.9   | 4.0   | 5.1   | 0.56 | 3.8E-01 |
| B035DRAFT_00753 | hypothetical protein                                                       | 9.2   | 8.8   | 9.2   | 8.4   | 8.7   | 2.9   | 0.66 | 5.2E-01 |
| B035DRAFT_00754 | Protein of unknown function (DUF3164).                                     | 23.0  | 20.8  | 18.4  | 16.7  | 22.4  | 9.4   | 0.74 | 5.2E-01 |
| B035DRAFT_00755 | hypothetical protein                                                       | 21.9  | 17.9  | 15.1  | 12.5  | 16.7  | 8.6   | 0.67 | 3.3E-01 |
| B035DRAFT_00756 | hypothetical protein                                                       | 22.9  | 17.8  | 27.1  | 17.6  | 10.7  | 11.4  | 0.58 | 1.9E-01 |
| B035DRAFT_00757 | hypothetical protein                                                       | 26.2  | 22.6  | 25.4  | 31.2  | 32.6  | 22.9  | 1.16 | 5.0E-01 |
| B035DRAFT_00758 | hypothetical protein                                                       | 14.5  | 12.7  | 16.2  | 16.1  | 13.1  | 8.2   | 0.83 | 6.4E-01 |
| B035DRAFT_00759 | Phage virion morphogenesis family                                          | 8.9   | 4.9   | 10.8  | 9.3   | 8.0   | 11.9  | 1.24 | 6.6E-01 |
| B035DRAFT_00760 | phage putative head morphogenesis protein, SPP1 gp7 family                 | 7.7   | 5.8   | 6.6   | 7.6   | 8.1   | 5.9   | 1.07 | 7.8E-01 |
| B035DRAFT_00761 | Mu-like prophage protein gp36                                              | 3.2   | 0.5   | 1.9   | 0.8   | 2.9   | 1.4   | 1.07 | 9.6E-01 |
| B035DRAFT_00762 | hypothetical protein                                                       | 3.1   | 4.4   | 3.2   | 2.5   | 2.6   | 3.0   | 0.76 | 2.6E-01 |
| B035DRAFT_00763 | Transcriptional regulator, contains sigma factor-related N-terminal domain | 1.9   | 1.7   | 0.5   | 1.6   | 3.0   | 1.4   | 1.64 | 6.0E-01 |
| B035DRAFT_00764 | Caudovirus prohead protease.                                               | 13.4  | 9.6   | 10.2  | 5.9   | 6.8   | 2.5   | 0.43 | 2.1E-01 |
| B035DRAFT_00765 | hypothetical protein                                                       | 21.5  | 18.7  | 20.7  | 11.9  | 9.2   | 5.1   | 0.41 | 1.2E-01 |
| B035DRAFT_00766 | N-acetylmuramoyl-L-alanine amidase( EC:3.5.1.28 )                          | 30.9  | 23.2  | 35.8  | 21.0  | 13.2  | 4.3   | 0.36 | 2.8E-01 |
| B035DRAFT_00767 | hypothetical protein                                                       | 13.3  | 9.0   | 11.5  | 10.3  | 7.3   | 2.4   | 0.51 | 4.1E-01 |
| B035DRAFT_00768 | hypothetical protein                                                       | 16.3  | 13.8  | 16.4  | 8.9   | 9.5   | 4.6   | 0.47 | 1.5E-01 |
| B035DRAFT_00769 | hypothetical protein                                                       | 9.2   | 9.4   | 6.4   | 6.7   | 4.5   | 3.5   | 0.57 | 2.2E-01 |
| B035DRAFT_00770 | hypothetical protein                                                       | 8.8   | 7.1   | 8.4   | 6.1   | 5.9   | 2.1   | 0.52 | 3.3E-01 |
| B035DRAFT_00771 | hypothetical protein                                                       | 4.8   | 5.2   | 5.0   | 3.9   | 1.3   | 2.0   | 0.44 | 2.0E-01 |
| B035DRAFT_00772 | hypothetical protein                                                       | 9.1   | 7.1   | 7.9   | 5.6   | 5.6   | 3.4   | 0.59 | 1.7E-01 |
| B035DRAFT_00773 | hypothetical protein                                                       | 10.0  | 5.5   | 11.5  | 6.6   | 5.2   | 3.3   | 0.57 | 3.3E-01 |
| B035DRAFT_00774 | hypothetical protein                                                       | 13.0  | 9.8   | 12.6  | 10.1  | 8.0   | 4.1   | 0.59 | 3.3E-01 |
| B035DRAFT_00775 | hypothetical protein                                                       | 30.7  | 27.1  | 28.3  | 29.5  | 23.8  | 10.6  | 0.68 | 5.0E-01 |
| B035DRAFT_00776 | Retron-type reverse transcriptase                                          | 65.1  | 61.2  | 61.3  | 50.1  | 53.4  | 45.1  | 0.79 | 8.0E-02 |
| B035DRAFT_00777 | hypothetical protein                                                       | 130.3 | 124.7 | 125.0 | 122.4 | 120.0 | 74.3  | 0.81 | 4.8E-01 |
| B035DRAFT_00778 | Site-specific DNA methylase( EC:2.1.1.72 )                                 | 148.1 | 151.4 | 157.0 | 175.7 | 147.7 | 149.0 | 1.03 | 7.8E-01 |
| B035DRAFT_00779 | Outer membrane protein                                                     | 435.2 | 519.2 | 457.3 | 490.9 | 495.6 | 601.9 | 1.12 | 4.5E-01 |
| B035DRAFT_00780 | hypothetical protein                                                       | 85.6  | 90.8  | 82.2  | 113.8 | 117.1 | 123.5 | 1.37 | 2.1E-02 |
| B035DRAFT_00781 | Xaa-His dipeptidase( EC:3.4.13.)                                           | 195.4 | 188.9 | 181.4 | 231.6 | 287.3 | 249.9 | 1.35 | 7.6E-02 |
| B035DRAFT_00782 | Predicted extracellular nuclease                                           | 194.7 | 196.0 | 190.8 | 217.8 | 255.2 | 253.6 | 1.25 | 8.6E-02 |
| B035DRAFT_00783 | Divergent AAA domain.                                                      | 22.8  | 23.4  | 21.0  | 19.9  | 24.1  | 30.5  | 1.09 | 7.0E-01 |
| B035DRAFT_00784 | Uncharacterized conserved protein                                          | 11.1  | 15.7  | 11.5  | 11.0  | 15.6  | 11.3  | 0.99 | 9.8E-01 |
| B035DRAFT_00785 | Arylsulfatase A and related enzymes                                        | 3.5   | 3.7   | 4.7   | 2.4   | 4.3   | 2.0   | 0.70 | 4.2E-01 |
| B035DRAFT_00786 | Arylsulfatase A and related enzymes( EC:3.1.6.1 )                          | 2.7   | 3.4   | 3.1   | 3.5   | 3.2   | 1.9   | 0.92 | 8.3E-01 |
| B035DRAFT_00787 | N-acetyl-beta-hexosaminidase( EC:3.2.1.52 ) (GH20)                         | 4.4   | 3.1   | 3.5   | 2.4   | 3.3   | 2.4   | 0.72 | 2.7E-01 |
| B035DRAFT_00788 | SusD family                                                                | 9.4   | 8.0   | 9.4   | 6.7   | 6.2   | 7.5   | 0.76 | 1.2E-01 |
| B035DRAFT_00789 | TonB-linked outer membrane protein, SusC/RagA family                       | 9.9   | 6.3   | 7.8   | 5.5   | 6.4   | 6.2   | 0.77 | 3.2E-01 |
| B035DRAFT_00790 | Fe2+-dicitrate sensor, membrane component                                  | 17.8  | 17.6  | 17.6  | 15.0  | 14.8  | 22.3  | 0.97 | 8.9E-01 |

|                 |                                                                                           |        |        |        |       |       |       |      |         |
|-----------------|-------------------------------------------------------------------------------------------|--------|--------|--------|-------|-------|-------|------|---------|
| B035DRAFT_00791 | RNA polymerase sigma-70 factor, Bacteroides expansion family 1                            | 14.7   | 20.5   | 17.1   | 15.8  | 20.9  | 21.2  | 1.11 | 6.8E-01 |
| B035DRAFT_00792 | nicotinate-nucleotide pyrophosphorylase( EC:2.4.2.19 )                                    | 253.2  | 287.6  | 244.2  | 235.0 | 233.1 | 199.5 | 0.85 | 2.6E-01 |
| B035DRAFT_00793 | hypothetical protein                                                                      | 148.9  | 214.1  | 219.5  | 134.6 | 174.8 | 179.5 | 0.85 | 5.5E-01 |
| B035DRAFT_00794 | Acyl-CoA synthetases (AMP-forming)/AMP-acid ligases II( EC:6.2.1.26 )                     | 145.8  | 151.2  | 153.7  | 141.3 | 157.9 | 156.0 | 1.01 | 9.1E-01 |
| B035DRAFT_00795 | L-alanine-DL-glutamate epimerase and related enzymes of enolase superfamily               | 125.9  | 123.3  | 133.3  | 124.8 | 139.5 | 122.0 | 1.01 | 9.3E-01 |
| B035DRAFT_00796 | Uncharacterized protein conserved in bacteria                                             | 115.7  | 126.3  | 113.5  | 96.8  | 104.5 | 123.9 | 0.91 | 5.2E-01 |
| B035DRAFT_00797 | naphthoate synthase (dihydroxynaphthoic acid synthetase)( EC:4.1.3.36 )                   | 132.1  | 124.5  | 129.8  | 128.7 | 120.7 | 84.0  | 0.85 | 5.0E-01 |
| B035DRAFT_00798 | 2-succinyl-5-enolpyruvyl-6-hydroxy-3-cyclohexene-1-carboxylic-acid synthase( EC:2.2.1.9 ) | 105.1  | 99.2   | 110.7  | 87.9  | 85.1  | 87.6  | 0.83 | 4.9E-02 |
| B035DRAFT_00799 | isochorismate synthases( EC:5.4.4.2 )                                                     | 251.7  | 220.6  | 238.3  | 193.5 | 155.5 | 183.2 | 0.75 | 1.0E-01 |
| B035DRAFT_00800 | uncharacterized domain 1                                                                  | 325.8  | 373.2  | 345.5  | 348.4 | 239.3 | 262.4 | 0.80 | 3.3E-01 |
| B035DRAFT_00801 | putative efflux protein, MATE family                                                      | 21.3   | 20.2   | 21.3   | 16.5  | 13.6  | 17.1  | 0.75 | 9.6E-02 |
| B035DRAFT_00802 | Thioredoxin.                                                                              | 247.7  | 202.4  | 175.1  | 150.4 | 168.3 | 123.2 | 0.71 | 2.1E-01 |
| B035DRAFT_00803 | Uncharacterized NAD(FAD)-dependent dehydrogenases                                         | 121.3  | 81.2   | 104.1  | 63.8  | 67.0  | 41.5  | 0.56 | 1.6E-01 |
| B035DRAFT_00804 | Transcriptional regulators                                                                | 92.1   | 92.8   | 77.2   | 57.7  | 71.0  | 79.6  | 0.79 | 2.8E-01 |
| B035DRAFT_00805 | Chloride channel protein EriC                                                             | 134.2  | 107.6  | 115.1  | 64.5  | 71.3  | 54.2  | 0.53 | 4.2E-02 |
| B035DRAFT_00806 | Uncharacterized protein conserved in bacteria                                             | 73.2   | 62.2   | 62.4   | 56.9  | 52.3  | 29.5  | 0.68 | 3.3E-01 |
| B035DRAFT_00807 | Periplasmic protease                                                                      | 90.0   | 87.4   | 92.6   | 103.0 | 109.6 | 95.7  | 1.14 | 1.5E-01 |
| B035DRAFT_00808 | hypothetical protein                                                                      | 33.3   | 35.8   | 35.5   | 24.9  | 25.1  | 32.2  | 0.78 | 1.8E-01 |
| B035DRAFT_00809 | Lactoylglutathione lyase and related lyases( EC:4.4.1.5 )                                 | 169.4  | 165.4  | 171.0  | 215.0 | 193.9 | 284.4 | 1.35 | 2.0E-01 |
| B035DRAFT_00810 | Acyl dehydratase                                                                          | 358.6  | 380.9  | 390.8  | 275.0 | 263.8 | 301.1 | 0.74 | 3.9E-02 |
| B035DRAFT_00811 | O-6-methylguanine DNA methyltransferase                                                   | 519.8  | 473.9  | 544.2  | 361.9 | 300.4 | 325.7 | 0.64 | 3.6E-02 |
| B035DRAFT_00812 | Protein-tyrosine-phosphatase( EC:1.20.4.1 )                                               | 1179.6 | 1034.1 | 1048.0 | 956.2 | 701.4 | 579.7 | 0.67 | 2.0E-01 |
| B035DRAFT_00813 | hypothetical protein                                                                      | 43.6   | 42.5   | 51.4   | 38.5  | 38.3  | 44.8  | 0.88 | 4.0E-01 |
| B035DRAFT_00814 | hypothetical protein                                                                      | 90.7   | 69.1   | 50.4   | 38.7  | 63.8  | 27.0  | 0.60 | 3.6E-01 |
| B035DRAFT_00815 | Pseudouridylate synthases, 23S RNA-specific( EC:5.4.99.29,EC:5.4.99.28 )                  | 33.0   | 29.5   | 32.2   | 21.8  | 21.6  | 16.3  | 0.63 | 7.3E-02 |
| B035DRAFT_00816 | putative efflux protein, MATE family                                                      | 124.4  | 118.0  | 127.3  | 44.4  | 48.1  | 38.4  | 0.35 | 3.9E-03 |
| B035DRAFT_00817 | hypothetical protein                                                                      | 5.9    | 5.7    | 7.2    | 6.2   | 10.7  | 10.8  | 1.43 | 3.3E-01 |
| B035DRAFT_00818 | RND family efflux transporter, MFP subunit                                                | 493.9  | 484.2  | 463.4  | 110.2 | 111.3 | 97.5  | 0.22 | 2.3E-04 |
| B035DRAFT_00819 | The (Largely Gram-negative Bacterial) Hydrophobe/Amphiphile Efflux-1 (HAE1) Family        | 365.5  | 342.2  | 350.9  | 111.6 | 123.3 | 86.4  | 0.30 | 9.9E-03 |
| B035DRAFT_00820 | efflux transporter, outer membrane factor (OMF) lipoprotein, NodT family                  | 406.0  | 385.2  | 414.7  | 147.3 | 150.5 | 108.2 | 0.33 | 1.4E-02 |
| B035DRAFT_00821 | Glycoside hydrolase (GH95)                                                                | 114.5  | 93.7   | 122.5  | 94.7  | 86.8  | 27.1  | 0.55 | 4.3E-01 |
| B035DRAFT_00822 | Predicted permease                                                                        | 98.2   | 79.2   | 89.7   | 72.0  | 78.2  | 33.4  | 0.65 | 3.9E-01 |
| B035DRAFT_00823 | hypothetical protein                                                                      | 0.0    | 1.7    | 1.8    | 0.0   | 0.0   | 0.0   | 0.00 |         |
| B035DRAFT_00824 | Undecaprenyl-phosphate glucose phosphotransferase                                         | 29.7   | 30.5   | 31.2   | 35.5  | 34.5  | 35.6  | 1.16 | 2.2E-02 |
| B035DRAFT_00825 | Periplasmic protein involved in polysaccharide export                                     | 22.8   | 28.8   | 16.9   | 24.5  | 28.6  | 27.7  | 1.21 | 5.2E-01 |
| B035DRAFT_00826 | capsular exopolysaccharide family                                                         | 53.5   | 47.2   | 51.0   | 65.5  | 69.8  | 46.2  | 1.18 | 5.0E-01 |
| B035DRAFT_00827 | Negative regulator of beta-lactamase expression( EC:3.5.1.28 )                            | 7.2    | 4.0    | 6.0    | 8.8   | 9.6   | 6.5   | 1.48 | 3.3E-01 |
| B035DRAFT_00828 | DNA-binding protein, histone-like, putative                                               | 4.1    | 5.2    | 4.1    | 5.5   | 6.5   | 0.3   | 0.52 | 7.1E-01 |
| B035DRAFT_00829 | conserved hypothetical protein (putative transposase or invertase)                        | 402.9  | 351.9  | 361.9  | 488.5 | 441.3 | 391.6 | 1.18 | 2.6E-01 |
| B035DRAFT_00830 | hypothetical protein                                                                      | 245.0  | 232.1  | 211.8  | 247.9 | 231.3 | 195.4 | 0.98 | 8.8E-01 |
| B035DRAFT_00831 | VirE N-terminal domain.                                                                   | 12.9   | 10.6   | 16.4   | 11.7  | 9.5   | 4.9   | 0.63 | 3.8E-01 |
| B035DRAFT_00832 | Transcription antiterminator                                                              | 42.5   | 26.3   | 38.2   | 53.6  | 48.3  | 11.6  | 0.89 | 9.1E-01 |
| B035DRAFT_00833 | Membrane protein involved in the export of O-antigen and teichoic acid                    | 17.9   | 16.7   | 19.1   | 16.4  | 23.3  | 22.4  | 1.14 | 5.2E-01 |
| B035DRAFT_00834 | Acetyltransferase (isoleucine patch superfamily)                                          | 16.5   | 21.9   | 22.1   | 21.6  | 27.5  | 27.5  | 1.27 | 3.2E-01 |
| B035DRAFT_00835 | hypothetical protein                                                                      | 12.8   | 13.4   | 9.3    | 9.2   | 14.9  | 20.3  | 1.20 | 7.0E-01 |
| B035DRAFT_00836 | Glycosyltransferases involved in cell wall biogenesis (GT2)                               | 18.3   | 20.5   | 17.2   | 19.7  | 16.2  | 22.3  | 1.03 | 8.8E-01 |
| B035DRAFT_00837 | Coenzyme F420-reducing hydrogenase, beta subunit                                          | 26.9   | 28.2   | 24.6   | 25.5  | 27.9  | 30.3  | 1.05 | 6.7E-01 |

|                 |                                                                                                                   |        |        |        |        |        |        |  |      |         |
|-----------------|-------------------------------------------------------------------------------------------------------------------|--------|--------|--------|--------|--------|--------|--|------|---------|
| B035DRAFT_00838 | Uncharacterized conserved protein                                                                                 | 19.0   | 30.2   | 27.2   | 23.2   | 24.8   | 31.1   |  | 1.05 | 8.9E-01 |
| B035DRAFT_00839 | Bacterial transferase hexapeptide (three repeats).                                                                | 15.8   | 21.1   | 19.2   | 18.7   | 17.8   | 24.9   |  | 1.09 | 7.3E-01 |
| B035DRAFT_00840 | Glycosyl transferases group 1 (GT4)                                                                               | 15.3   | 15.8   | 13.2   | 13.8   | 15.3   | 20.0   |  | 1.10 | 6.8E-01 |
| B035DRAFT_00841 | Acetyltransferase (isoleucine patch superfamily)( EC:2.3.1.79 )                                                   | 14.4   | 22.3   | 18.3   | 19.5   | 20.0   | 21.2   |  | 1.12 | 6.2E-01 |
| B035DRAFT_00842 | hypothetical protein                                                                                              | 29.5   | 32.4   | 33.2   | 33.5   | 30.2   | 38.6   |  | 1.07 | 6.4E-01 |
| B035DRAFT_00843 | Glycosyltransferase (GT4)                                                                                         | 30.0   | 26.0   | 25.5   | 22.2   | 25.2   | 28.1   |  | 0.93 | 6.2E-01 |
| B035DRAFT_00844 | bacterial polymer biosynthesis proteins, WecB/TagA/CpsF family (GT26)                                             | 21.2   | 29.6   | 20.9   | 21.6   | 22.7   | 22.3   |  | 0.94 | 7.8E-01 |
| B035DRAFT_00845 | Mannose-1-phosphate guanylyltransferase( EC:2.7.7.22 )                                                            | 26.5   | 25.0   | 23.2   | 21.8   | 22.7   | 20.0   |  | 0.86 | 1.8E-01 |
| B035DRAFT_00846 | hypothetical protein                                                                                              | 19.3   | 16.8   | 21.6   | 15.7   | 14.6   | 4.1    |  | 0.51 | 4.1E-01 |
| B035DRAFT_00847 | hypothetical protein                                                                                              | 34.6   | 27.0   | 30.0   | 21.3   | 25.0   | 20.4   |  | 0.73 | 1.4E-01 |
| B035DRAFT_00848 | Pyruvate/2-oxoglutarate dehydrogenase complex, dihydrolipoamide dehydrogenase (E3) component, and related enzymes | 227.2  | 142.6  | 163.7  | 171.3  | 154.4  | 123.2  |  | 0.85 | 5.9E-01 |
| B035DRAFT_00849 | Predicted membrane protein                                                                                        | 168.1  | 130.9  | 130.4  | 141.4  | 148.2  | 176.9  |  | 1.09 | 6.7E-01 |
| B035DRAFT_00850 | AraC-type DNA-binding domain-containing proteins                                                                  | 169.7  | 146.9  | 144.3  | 179.7  | 174.2  | 222.8  |  | 1.25 | 2.3E-01 |
| B035DRAFT_00851 | thioredoxin                                                                                                       | 358.6  | 263.9  | 234.4  | 358.3  | 289.0  | 286.5  |  | 1.10 | 7.2E-01 |
| B035DRAFT_00852 | Signal transduction histidine kinase                                                                              | 19.6   | 23.1   | 20.0   | 24.0   | 24.6   | 32.9   |  | 1.29 | 2.6E-01 |
| B035DRAFT_00853 | Lysine 2,3-aminomutase( EC:5.4.3.2 )                                                                              | 66.5   | 68.0   | 71.7   | 94.7   | 92.5   | 123.1  |  | 1.49 | 8.5E-02 |
| B035DRAFT_00854 | Outer membrane receptor for ferrienterochelin and colicins                                                        | 48.4   | 48.8   | 49.5   | 54.8   | 64.8   | 44.7   |  | 1.11 | 6.0E-01 |
| B035DRAFT_00855 | hypothetical protein                                                                                              | 204.9  | 214.6  | 217.9  | 239.2  | 230.4  | 199.2  |  | 1.05 | 6.7E-01 |
| B035DRAFT_00856 | 5"-nucleotidase/2",3"-cyclic phosphodiesterase and related esterases( EC:3.1.4.16 )                               | 212.1  | 213.0  | 199.3  | 205.1  | 231.5  | 183.4  |  | 0.99 | 9.4E-01 |
| B035DRAFT_00857 | Signal transduction histidine kinase                                                                              | 138.6  | 138.4  | 136.0  | 138.0  | 163.7  | 146.1  |  | 1.08 | 4.0E-01 |
| B035DRAFT_00858 | DnaJ-class molecular chaperone with C-terminal Zn finger domain                                                   | 389.1  | 285.0  | 326.8  | 343.5  | 222.7  | 124.8  |  | 0.64 | 4.3E-01 |
| B035DRAFT_00859 | hypothetical protein                                                                                              | 292.1  | 268.6  | 296.9  | 281.6  | 212.1  | 229.2  |  | 0.84 | 3.1E-01 |
| B035DRAFT_00860 | Transcriptional accessory protein                                                                                 | 152.9  | 127.3  | 137.5  | 114.7  | 109.4  | 91.7   |  | 0.75 | 1.4E-01 |
| B035DRAFT_00861 | NTP pyrophosphohydrolases containing a Zn-finger, probably nucleic-acid-binding( EC:3.6.1.22 )                    | 87.3   | 81.1   | 92.1   | 93.2   | 83.0   | 72.8   |  | 0.95 | 7.4E-01 |
| B035DRAFT_00862 | Predicted permease                                                                                                | 115.1  | 125.5  | 137.2  | 127.2  | 122.2  | 108.9  |  | 0.95 | 6.8E-01 |
| B035DRAFT_00863 | Uncharacterized protein conserved in bacteria( EC:3.1.3.11 )                                                      | 127.2  | 149.8  | 144.9  | 125.6  | 143.7  | 150.5  |  | 0.99 | 9.8E-01 |
| B035DRAFT_00864 | L-aspartate-alpha-decarboxylase( EC:4.1.1.11 )                                                                    | 620.3  | 638.3  | 616.7  | 582.1  | 554.9  | 500.4  |  | 0.87 | 1.6E-01 |
| B035DRAFT_00865 | pantoate-beta-alanine ligase( EC:6.3.2.1 )                                                                        | 450.3  | 500.1  | 499.9  | 397.8  | 400.6  | 358.8  |  | 0.80 | 7.6E-02 |
| B035DRAFT_00866 | Glycogen synthase( EC:2.4.1.21 ) (GT5)                                                                            | 591.5  | 689.1  | 592.5  | 626.2  | 541.4  | 605.5  |  | 0.95 | 6.6E-01 |
| B035DRAFT_00867 | hypothetical protein                                                                                              | 763.2  | 792.0  | 727.3  | 874.9  | 843.7  | 964.7  |  | 1.17 | 1.3E-01 |
| B035DRAFT_00868 | Phosphomannomutase( EC:5.4.2.8 )                                                                                  | 578.4  | 573.1  | 533.1  | 517.4  | 600.6  | 642.7  |  | 1.04 | 7.5E-01 |
| B035DRAFT_00869 | Dipeptidase                                                                                                       | 191.8  | 167.8  | 168.0  | 168.7  | 211.3  | 175.8  |  | 1.05 | 7.5E-01 |
| B035DRAFT_00870 | Membrane proteins related to metalloendopeptidases                                                                | 106.3  | 86.9   | 97.0   | 136.0  | 130.2  | 78.3   |  | 1.16 | 6.7E-01 |
| B035DRAFT_00871 | alanine dehydrogenase( EC:1.4.1.1 )                                                                               | 25.8   | 21.8   | 24.1   | 42.7   | 48.8   | 42.3   |  | 1.87 | 1.7E-02 |
| B035DRAFT_00872 | hypothetical protein                                                                                              | 51.4   | 54.9   | 52.4   | 60.4   | 72.5   | 68.9   |  | 1.27 | 9.1E-02 |
| B035DRAFT_00873 | Predicted membrane protein                                                                                        | 124.6  | 123.9  | 132.2  | 154.8  | 148.8  | 169.2  |  | 1.24 | 6.4E-02 |
| B035DRAFT_00874 | Transcriptional regulator                                                                                         | 192.7  | 212.6  | 202.8  | 260.1  | 294.0  | 326.0  |  | 1.44 | 6.1E-02 |
| B035DRAFT_00875 | hypothetical protein                                                                                              | 170.1  | 173.4  | 149.8  | 261.5  | 251.8  | 178.8  |  | 1.39 | 2.1E-01 |
| B035DRAFT_00876 | ATP-dependent chaperone ClpB                                                                                      | 641.0  | 463.4  | 541.7  | 528.5  | 545.7  | 532.0  |  | 0.98 | 9.3E-01 |
| B035DRAFT_00877 | hypothetical protein                                                                                              | 718.2  | 822.9  | 765.4  | 845.6  | 899.7  | 1015.5 |  | 1.20 | 2.0E-01 |
| B035DRAFT_00878 | dephospho-CoA kinase( EC:2.7.1.24 )                                                                               | 236.3  | 228.3  | 235.5  | 211.5  | 238.0  | 198.5  |  | 0.92 | 4.2E-01 |
| B035DRAFT_00879 | YbbR-like protein.                                                                                                | 353.8  | 360.6  | 345.2  | 316.0  | 352.8  | 402.6  |  | 1.01 | 9.7E-01 |
| B035DRAFT_00880 | preprotein translocase, YajC subunit                                                                              | 916.6  | 1082.5 | 1026.5 | 1060.7 | 990.9  | 1221.8 |  | 1.08 | 5.9E-01 |
| B035DRAFT_00881 | transcription antitermination factor NusB                                                                         | 1067.5 | 1273.3 | 1140.2 | 1094.4 | 1060.7 | 1315.3 |  | 1.00 | 9.8E-01 |
| B035DRAFT_00882 | Protein of unknown function (DUF3276).                                                                            | 158.9  | 196.4  | 143.9  | 250.9  | 267.1  | 299.5  |  | 1.65 | 7.0E-02 |
| B035DRAFT_00883 | ribosomal protein L25, Ctc-form                                                                                   | 2319.7 | 2811.9 | 2511.8 | 2109.2 | 2079.9 | 2431.4 |  | 0.87 | 3.2E-01 |
| B035DRAFT_00884 | peptidyl-tRNA hydrolase( EC:3.1.1.29 )                                                                            | 275.0  | 334.6  | 302.1  | 283.1  | 298.1  | 303.2  |  | 0.97 | 8.1E-01 |

|                 |                                                                                                            |        |        |        |        |        |        |      |         |
|-----------------|------------------------------------------------------------------------------------------------------------|--------|--------|--------|--------|--------|--------|------|---------|
| B035DRAFT_00885 | Ribosome-associated heat shock protein implicated in the recycling of the 50S subunit (S4 paralog)         | 208.3  | 216.5  | 200.3  | 227.2  | 224.9  | 195.0  | 1.03 | 7.5E-01 |
| B035DRAFT_00886 | Kef-type K+ transport systems, membrane components                                                         | 86.5   | 96.4   | 85.8   | 73.2   | 94.7   | 98.5   | 0.98 | 9.4E-01 |
| B035DRAFT_00887 | glycine cleavage system T protein( EC:2.1.2.10 )                                                           | 718.5  | 732.5  | 671.6  | 691.7  | 779.7  | 779.3  | 1.06 | 5.0E-01 |
| B035DRAFT_00888 | peptidase T( EC:3.4.11.4 )                                                                                 | 258.4  | 258.1  | 234.8  | 295.5  | 364.6  | 394.1  | 1.39 | 1.2E-01 |
| B035DRAFT_00889 | Glutamine phosphoribosylpyrophosphate amidotransferase( EC:2.4.2.14 )                                      | 296.8  | 300.6  | 306.4  | 251.3  | 271.5  | 236.0  | 0.84 | 8.5E-02 |
| B035DRAFT_00890 | Abortive infection bacteriophage resistance protein                                                        | 248.0  | 276.5  | 240.9  | 232.4  | 244.0  | 279.5  | 0.99 | 9.2E-01 |
| B035DRAFT_00891 | hypothetical protein                                                                                       | 64.4   | 47.8   | 57.6   | 48.0   | 53.5   | 67.4   | 0.99 | 9.8E-01 |
| B035DRAFT_00892 | protein CrcB                                                                                               | 98.8   | 96.6   | 89.9   | 89.9   | 104.2  | 90.2   | 1.00 | 9.7E-01 |
| B035DRAFT_00893 | phosphopyruvate hydratase( EC:4.2.1.11 )                                                                   | 1913.0 | 1684.4 | 1749.3 | 2101.9 | 1425.8 | 1304.3 | 0.89 | 6.6E-01 |
| B035DRAFT_00894 | Superfamily II DNA helicase                                                                                | 472.3  | 498.3  | 462.6  | 372.0  | 468.5  | 421.4  | 0.88 | 3.2E-01 |
| B035DRAFT_00895 | ( tRNA )                                                                                                   | 0.0    | 0.0    | 0.0    | 0.0    | 0.0    | 0.0    | 0.00 |         |
| B035DRAFT_00896 | hypothetical protein                                                                                       | 78.5   | 93.4   | 85.5   | 62.3   | 74.8   | 101.2  | 0.91 | 7.4E-01 |
| B035DRAFT_00897 | Glycosyltransferases involved in cell wall biogenesis (GT2)                                                | 87.6   | 91.4   | 92.9   | 92.3   | 93.7   | 109.1  | 1.08 | 4.4E-01 |
| B035DRAFT_00898 | hypothetical protein                                                                                       | 89.5   | 101.2  | 83.5   | 97.5   | 96.8   | 124.7  | 1.16 | 4.2E-01 |
| B035DRAFT_00899 | hypothetical protein                                                                                       | 74.0   | 79.7   | 77.6   | 73.9   | 91.0   | 83.4   | 1.07 | 5.6E-01 |
| B035DRAFT_00900 | Predicted membrane protein                                                                                 | 36.9   | 40.4   | 44.5   | 37.9   | 34.2   | 42.9   | 0.94 | 7.1E-01 |
| B035DRAFT_00901 | Membrane-associated lipoprotein involved in thiamine biosynthesis                                          | 62.2   | 76.7   | 67.5   | 69.3   | 80.7   | 85.9   | 1.14 | 4.1E-01 |
| B035DRAFT_00902 | Multiple antibiotic transporter                                                                            | 88.0   | 86.3   | 85.6   | 83.2   | 89.1   | 105.1  | 1.06 | 6.3E-01 |
| B035DRAFT_00903 | cAMP-binding proteins - catabolite gene activator and regulatory subunit of cAMP-dependent protein kinases | 134.6  | 136.8  | 137.3  | 183.7  | 151.5  | 189.6  | 1.28 | 1.3E-01 |
| B035DRAFT_00904 | Zn-dependent oligopeptidases( EC:3.4.15.5 )                                                                | 328.0  | 325.6  | 302.5  | 449.2  | 486.8  | 535.7  | 1.54 | 2.6E-02 |
| B035DRAFT_00905 | hypothetical protein                                                                                       | 258.6  | 270.5  | 252.1  | 331.5  | 344.4  | 435.0  | 1.41 | 9.7E-02 |
| B035DRAFT_00906 | Deoxycytidylate deaminase( EC:3.5.4.12 )                                                                   | 217.9  | 194.1  | 194.7  | 267.4  | 297.5  | 347.3  | 1.50 | 7.0E-02 |
| B035DRAFT_00907 | C-terminal peptidase (prc)( EC:3.4.21.102 )                                                                | 232.6  | 240.0  | 220.0  | 307.1  | 301.6  | 337.0  | 1.36 | 2.8E-02 |
| B035DRAFT_00908 | 5,10-methenyltetrahydrofolate synthetase( EC:6.3.3.2 )                                                     | 256.9  | 253.7  | 240.0  | 318.8  | 327.9  | 370.9  | 1.35 | 4.4E-02 |
| B035DRAFT_00909 | Protein of unknown function (DUF721).                                                                      | 108.6  | 118.1  | 132.1  | 117.3  | 111.0  | 145.1  | 1.04 | 8.5E-01 |
| B035DRAFT_00910 | recF protein                                                                                               | 82.2   | 78.8   | 74.6   | 88.4   | 95.1   | 89.0   | 1.16 | 9.4E-02 |
| B035DRAFT_00911 | Uncharacterized protein conserved in bacteria                                                              | 834.4  | 967.6  | 771.9  | 820.7  | 706.9  | 695.8  | 0.87 | 3.6E-01 |
| B035DRAFT_00912 | 6,7-dimethyl-8-ribityllumazine synthase( EC:2.5.1.78 )                                                     | 282.9  | 292.6  | 259.6  | 250.3  | 259.2  | 290.1  | 0.96 | 6.7E-01 |
| B035DRAFT_00913 | ( tRNA )                                                                                                   | 188.6  | 427.6  | 515.6  | 356.7  | 202.6  | 192.1  | 0.69 | 5.8E-01 |
| B035DRAFT_00914 | ( tRNA )                                                                                                   | 491.7  | 505.7  | 639.2  | 494.5  | 347.2  | 291.3  | 0.68 | 2.6E-01 |
| B035DRAFT_00915 | Pirin-related protein                                                                                      | 445.7  | 438.1  | 414.0  | 446.5  | 355.6  | 443.6  | 0.96 | 7.5E-01 |
| B035DRAFT_00916 | hypothetical protein                                                                                       | 62.8   | 69.2   | 73.4   | 54.8   | 52.9   | 57.3   | 0.80 | 8.4E-02 |
| B035DRAFT_00917 | hypothetical protein                                                                                       | 27.7   | 21.1   | 29.1   | 26.8   | 32.2   | 31.0   | 1.16 | 4.7E-01 |
| B035DRAFT_00918 | hypothetical protein                                                                                       | 23.1   | 27.8   | 33.0   | 25.7   | 27.0   | 34.6   | 1.04 | 8.8E-01 |
| B035DRAFT_00919 | hypothetical protein                                                                                       | 36.0   | 41.3   | 38.6   | 41.9   | 46.4   | 46.9   | 1.17 | 1.8E-01 |
| B035DRAFT_00920 | exodeoxyribonuclease III( EC:3.1.11.2 )                                                                    | 84.8   | 76.3   | 76.9   | 82.2   | 94.8   | 81.1   | 1.08 | 4.6E-01 |
| B035DRAFT_00921 | hypothetical protein                                                                                       | 15.9   | 9.0    | 14.1   | 6.1    | 7.9    | 7.0    | 0.55 | 1.5E-01 |
| B035DRAFT_00922 | hypothetical protein                                                                                       | 7.4    | 8.7    | 10.7   | 8.2    | 11.1   | 5.6    | 0.90 | 8.1E-01 |
| B035DRAFT_00923 | ABC-type multidrug transport system, ATPase and permease components                                        | 8.2    | 8.1    | 7.5    | 5.6    | 8.6    | 6.6    | 0.86 | 5.2E-01 |
| B035DRAFT_00924 | hypothetical protein                                                                                       | 21.8   | 19.3   | 20.9   | 17.5   | 23.7   | 19.6   | 0.97 | 8.9E-01 |
| B035DRAFT_00925 | hypothetical protein                                                                                       | 17.5   | 17.9   | 23.3   | 19.6   | 16.4   | 15.4   | 0.88 | 5.3E-01 |
| B035DRAFT_00926 | hypothetical protein                                                                                       | 38.1   | 32.1   | 33.2   | 29.8   | 38.0   | 29.1   | 0.93 | 7.1E-01 |
| B035DRAFT_00927 | hypothetical protein                                                                                       | 23.1   | 30.2   | 24.6   | 18.2   | 11.8   | 5.2    | 0.40 | 2.3E-01 |
| B035DRAFT_00928 | hypothetical protein                                                                                       | 38.8   | 14.7   | 37.8   | 24.5   | 18.5   | 27.4   | 0.83 | 7.7E-01 |
| B035DRAFT_00929 | Periplasmic protease                                                                                       | 90.3   | 87.8   | 84.8   | 69.9   | 85.8   | 79.7   | 0.89 | 3.3E-01 |
| B035DRAFT_00930 | protein translocase, SecE subunit                                                                          | 920.0  | 1093.3 | 1059.5 | 977.8  | 895.6  | 1227.3 | 1.00 | 9.9E-01 |
| B035DRAFT_00931 | hypothetical protein                                                                                       | 167.1  | 172.1  | 179.5  | 199.1  | 197.5  | 251.9  | 1.24 | 2.0E-01 |
| B035DRAFT_00932 | hypothetical protein                                                                                       | 188.4  | 209.4  | 204.4  | 215.2  | 236.9  | 282.0  | 1.21 | 2.5E-01 |

|                 |                                                                                                                                                                                                     |        |        |        |        |        |        |  |      |         |
|-----------------|-----------------------------------------------------------------------------------------------------------------------------------------------------------------------------------------------------|--------|--------|--------|--------|--------|--------|--|------|---------|
| B035DRAFT_00933 | Response regulator containing CheY-like receiver, AAA-type ATPase, and DNA-binding domains                                                                                                          | 289.5  | 303.9  | 292.9  | 316.9  | 337.1  | 314.1  |  | 1.09 | 1.4E-01 |
| B035DRAFT_00934 | Myo-inositol-1-phosphate synthase( EC:5.5.1.4 )                                                                                                                                                     | 664.2  | 749.2  | 743.8  | 551.6  | 594.9  | 674.4  |  | 0.84 | 2.3E-01 |
| B035DRAFT_00935 | Sugar kinases, ribokinase family                                                                                                                                                                    | 101.6  | 112.8  | 96.4   | 87.7   | 89.5   | 83.8   |  | 0.84 | 1.3E-01 |
| B035DRAFT_00936 | Fucose permease                                                                                                                                                                                     | 76.5   | 78.5   | 77.6   | 72.1   | 82.7   | 71.3   |  | 0.97 | 7.4E-01 |
| B035DRAFT_00937 | haloacid dehalogenase superfamily, subfamily IA, variant 3 with third motif having DD or ED/haloacid dehalogenase superfamily, subfamily IA, variant 1 with third motif having Dx(3-4)D or Dx(3-4)E | 123.2  | 126.5  | 117.3  | 106.2  | 126.8  | 97.7   |  | 0.90 | 4.5E-01 |
| B035DRAFT_00938 | Uncharacterised protein family (UPF0104).                                                                                                                                                           | 121.0  | 131.1  | 133.5  | 114.3  | 138.2  | 127.0  |  | 0.98 | 8.8E-01 |
| B035DRAFT_00939 | Phosphatidylglycerophosphate synthase                                                                                                                                                               | 162.5  | 153.6  | 142.7  | 121.4  | 139.8  | 128.0  |  | 0.85 | 1.7E-01 |
| B035DRAFT_00940 | hypothetical protein                                                                                                                                                                                | 286.7  | 255.0  | 290.4  | 256.6  | 242.4  | 159.1  |  | 0.78 | 3.8E-01 |
| B035DRAFT_00941 | Nucleoside-diphosphate-sugar pyrophosphorylase involved in lipopolysaccharide biosynthesis/translation initiation factor 2B, gamma/epsilon subunits (eIF-2Bgamma/eIF-2Bepsilon)                     | 240.7  | 230.2  | 216.0  | 202.7  | 247.0  | 227.9  |  | 0.98 | 9.0E-01 |
| B035DRAFT_00942 | 4-hydroxythreonine-4-phosphate dehydrogenase( EC:1.1.1.262 )                                                                                                                                        | 377.6  | 363.1  | 357.9  | 332.7  | 394.2  | 333.3  |  | 0.96 | 7.2E-01 |
| B035DRAFT_00943 | hypothetical protein                                                                                                                                                                                | 250.5  | 255.0  | 239.9  | 234.8  | 288.7  | 300.3  |  | 1.10 | 5.1E-01 |
| B035DRAFT_00944 | 23S rRNA m2A2503 methyltransferase( EC:2.1.1.)                                                                                                                                                      | 240.6  | 251.1  | 244.8  | 248.5  | 258.3  | 232.7  |  | 1.00 | 9.6E-01 |
| B035DRAFT_00945 | Glycosyltransferases involved in cell wall biogenesis (GT2)                                                                                                                                         | 36.2   | 31.1   | 32.2   | 33.6   | 37.3   | 35.6   |  | 1.07 | 4.9E-01 |
| B035DRAFT_00946 | SpoIID/LytB domain                                                                                                                                                                                  | 44.8   | 43.4   | 49.2   | 38.9   | 45.4   | 41.6   |  | 0.92 | 4.1E-01 |
| B035DRAFT_00947 | Major Facilitator Superfamily                                                                                                                                                                       | 37.0   | 34.8   | 40.8   | 34.6   | 35.8   | 32.3   |  | 0.91 | 3.8E-01 |
| B035DRAFT_00948 | hypothetical protein                                                                                                                                                                                | 835.5  | 819.9  | 804.9  | 840.1  | 471.5  | 479.6  |  | 0.70 | 3.2E-01 |
| B035DRAFT_00949 | hypothetical protein                                                                                                                                                                                | 192.8  | 194.9  | 208.5  | 160.1  | 117.4  | 131.3  |  | 0.68 | 9.1E-02 |
| B035DRAFT_00950 | Predicted P-loop ATPase and inactivated derivatives                                                                                                                                                 | 120.8  | 104.3  | 146.3  | 105.0  | 82.4   | 35.9   |  | 0.55 | 3.5E-01 |
| B035DRAFT_00951 | hypothetical protein                                                                                                                                                                                | 463.8  | 489.9  | 628.4  | 531.5  | 471.9  | 481.5  |  | 0.95 | 7.7E-01 |
| B035DRAFT_00952 | hypothetical protein                                                                                                                                                                                | 16.8   | 22.4   | 19.7   | 17.6   | 17.3   | 23.4   |  | 0.99 | 9.6E-01 |
| B035DRAFT_00953 | hypothetical protein                                                                                                                                                                                | 11.1   | 9.7    | 9.8    | 8.3    | 9.3    | 11.0   |  | 0.93 | 6.7E-01 |
| B035DRAFT_00954 | hypothetical protein                                                                                                                                                                                | 3.9    | 2.1    | 1.1    | 2.1    | 3.8    | 1.1    |  | 0.99 | 9.9E-01 |
| B035DRAFT_00955 | hypothetical protein                                                                                                                                                                                | 10.6   | 7.4    | 11.0   | 6.7    | 8.9    | 5.8    |  | 0.74 | 3.6E-01 |
| B035DRAFT_00956 | Site-specific recombinase XerD                                                                                                                                                                      | 36.4   | 36.3   | 42.9   | 31.6   | 33.0   | 41.5   |  | 0.91 | 6.2E-01 |
| B035DRAFT_00957 | Protein of unknown function DUF262./HNH endonuclease.                                                                                                                                               | 82.2   | 84.0   | 79.7   | 69.1   | 90.2   | 61.1   |  | 0.88 | 5.6E-01 |
| B035DRAFT_00958 | hypothetical protein                                                                                                                                                                                | 75.3   | 81.8   | 73.3   | 64.9   | 69.9   | 70.8   |  | 0.89 | 2.0E-01 |
| B035DRAFT_00959 | hypothetical protein                                                                                                                                                                                | 112.3  | 129.0  | 106.2  | 120.7  | 136.7  | 152.4  |  | 1.18 | 3.3E-01 |
| B035DRAFT_00960 | Predicted transcriptional regulators                                                                                                                                                                | 34.8   | 41.4   | 35.3   | 36.6   | 39.8   | 47.4   |  | 1.11 | 5.5E-01 |
| B035DRAFT_00961 | Predicted N-acetylglucosamine kinase                                                                                                                                                                | 214.6  | 215.1  | 216.6  | 258.3  | 263.8  | 192.6  |  | 1.10 | 6.2E-01 |
| B035DRAFT_00962 | N-acetylmuramic acid 6-phosphate etherase( EC:4.2.)                                                                                                                                                 | 114.1  | 108.0  | 113.9  | 110.5  | 134.2  | 63.2   |  | 0.87 | 7.5E-01 |
| B035DRAFT_00963 | Uncharacterized protein conserved in bacteria                                                                                                                                                       | 142.9  | 129.8  | 120.3  | 112.2  | 131.3  | 129.2  |  | 0.95 | 6.8E-01 |
| B035DRAFT_00964 | Signal transduction histidine kinase                                                                                                                                                                | 103.5  | 99.1   | 101.4  | 85.2   | 125.5  | 99.7   |  | 1.01 | 9.8E-01 |
| B035DRAFT_00965 | Ribosomal protein S1                                                                                                                                                                                | 4093.7 | 4260.2 | 4044.2 | 3566.8 | 4298.5 | 4801.7 |  | 1.01 | 9.4E-01 |
| B035DRAFT_00966 | Cold shock proteins                                                                                                                                                                                 | 1293.6 | 1279.2 | 1107.8 | 1787.4 | 1839.6 | 2418.2 |  | 1.63 | 7.7E-02 |
| B035DRAFT_00967 | ribonuclease Z( EC:3.1.26.11 )                                                                                                                                                                      | 238.9  | 276.8  | 256.5  | 237.9  | 326.3  | 371.5  |  | 1.19 | 4.8E-01 |
| B035DRAFT_00968 | RNA polymerase sigma factor, sigma-70 family                                                                                                                                                        | 146.9  | 155.8  | 152.7  | 131.8  | 191.4  | 212.5  |  | 1.15 | 5.9E-01 |
| B035DRAFT_00969 | hypothetical protein                                                                                                                                                                                | 186.5  | 193.2  | 191.9  | 224.3  | 274.0  | 280.0  |  | 1.36 | 8.5E-02 |
| B035DRAFT_00970 | hypothetical protein                                                                                                                                                                                | 153.7  | 179.1  | 174.5  | 225.4  | 250.5  | 283.8  |  | 1.49 | 6.5E-02 |
| B035DRAFT_00971 | Predicted acyltransferases                                                                                                                                                                          | 45.0   | 44.2   | 44.7   | 42.6   | 60.9   | 59.3   |  | 1.20 | 3.9E-01 |
| B035DRAFT_00972 | Plasmid recombination enzyme.                                                                                                                                                                       | 3.9    | 3.6    | 3.7    | 4.6    | 1.2    | 2.0    |  | 0.59 | 4.7E-01 |
| B035DRAFT_00973 | hypothetical protein                                                                                                                                                                                | 4.0    | 3.9    | 1.6    | 6.3    | 3.0    | 1.2    |  | 0.97 | 9.8E-01 |
| B035DRAFT_00974 | TonB family C-terminal domain                                                                                                                                                                       | 4.9    | 6.0    | 6.8    | 6.4    | 5.7    | 9.0    |  | 1.18 | 5.8E-01 |
| B035DRAFT_00975 | TonB family C-terminal domain                                                                                                                                                                       | 4.6    | 4.7    | 4.1    | 4.1    | 3.0    | 5.9    |  | 0.94 | 8.7E-01 |
| B035DRAFT_00976 | hypothetical protein                                                                                                                                                                                | 8.6    | 9.7    | 16.7   | 17.4   | 12.6   | 7.4    |  | 1.05 | 9.4E-01 |
| B035DRAFT_00977 | hypothetical protein                                                                                                                                                                                | 35.6   | 39.5   | 34.7   | 49.9   | 49.0   | 64.4   |  | 1.48 | 9.3E-02 |
| B035DRAFT_00978 | hypothetical protein                                                                                                                                                                                | 41.5   | 48.7   | 38.8   | 45.6   | 51.4   | 70.0   |  | 1.28 | 3.6E-01 |

|                 |                                                                               |       |        |       |       |       |       |  |      |         |
|-----------------|-------------------------------------------------------------------------------|-------|--------|-------|-------|-------|-------|--|------|---------|
| B035DRAFT_00979 | ( tRNA )                                                                      | 67.6  | 131.4  | 141.2 | 120.2 | 66.1  | 46.7  |  | 0.67 | 5.3E-01 |
| B035DRAFT_00980 | Mismatch repair ATPase (MutS family)                                          | 36.0  | 35.6   | 33.1  | 32.6  | 42.4  | 43.6  |  | 1.12 | 5.1E-01 |
| B035DRAFT_00981 | L-serine dehydratase, iron-sulfur-dependent, single chain form( EC:4.3.1.17 ) | 133.6 | 135.1  | 143.2 | 135.0 | 140.0 | 139.2 |  | 1.01 | 9.0E-01 |
| B035DRAFT_00982 | hypothetical protein                                                          | 185.7 | 191.1  | 207.4 | 125.0 | 147.6 | 193.6 |  | 0.79 | 3.3E-01 |
| B035DRAFT_00983 | hypothetical protein                                                          | 359.3 | 364.7  | 341.0 | 323.2 | 307.5 | 381.4 |  | 0.95 | 6.6E-01 |
| B035DRAFT_00984 | Protein of unknown function (DUF2874).                                        | 427.9 | 437.7  | 427.9 | 400.0 | 362.2 | 421.9 |  | 0.91 | 3.0E-01 |
| B035DRAFT_00985 | hypothetical protein                                                          | 49.2  | 54.4   | 50.1  | 68.0  | 64.5  | 73.3  |  | 1.34 | 4.3E-02 |
| B035DRAFT_00986 | K+ transport systems, NAD-binding component                                   | 50.2  | 56.3   | 64.3  | 48.1  | 36.1  | 42.2  |  | 0.74 | 1.9E-01 |
| B035DRAFT_00987 | Trk-type K+ transport systems, membrane components                            | 108.2 | 109.8  | 121.2 | 104.3 | 76.1  | 86.9  |  | 0.78 | 2.2E-01 |
| B035DRAFT_00988 | pyridoxal-phosphate dependent TrpB-like enzyme( EC:4.2.1.20 )                 | 223.7 | 263.7  | 242.3 | 253.3 | 280.0 | 307.3 |  | 1.15 | 3.2E-01 |
| B035DRAFT_00989 | Porin subfamily                                                               | 206.1 | 151.0  | 184.7 | 146.7 | 175.6 | 136.7 |  | 0.85 | 4.4E-01 |
| B035DRAFT_00990 | ( tRNA )                                                                      | 98.4  | 73.1   | 76.8  | 115.3 | 70.1  | 59.3  |  | 0.95 | 9.2E-01 |
| B035DRAFT_00991 | hypothetical protein                                                          | 819.1 | 1058.2 | 925.0 | 941.3 | 787.5 | 782.2 |  | 0.90 | 5.3E-01 |
| B035DRAFT_00992 | hypothetical protein                                                          | 0.0   | 0.0    | 0.0   | 0.0   | 0.0   | 0.0   |  | 0.00 |         |
| B035DRAFT_00993 | hypothetical protein                                                          | 15.3  | 18.7   | 18.6  | 15.0  | 17.5  | 15.1  |  | 0.91 | 5.2E-01 |
| B035DRAFT_00994 | hypothetical protein                                                          | 67.3  | 60.0   | 66.3  | 91.5  | 117.5 | 109.7 |  | 1.64 | 4.4E-02 |
| B035DRAFT_00995 | Beta-glucosidase-related glycosidases( EC:3.2.1.21 ) (GH3)                    | 27.5  | 28.3   | 27.8  | 32.4  | 33.2  | 36.5  |  | 1.22 | 5.6E-02 |
| B035DRAFT_00996 | Beta-galactosidase/beta-glucuronidase (GH2)                                   | 13.6  | 13.9   | 13.0  | 13.7  | 16.9  | 15.5  |  | 1.14 | 2.9E-01 |
| B035DRAFT_00997 | Arylsulfatase A and related enzymes                                           | 7.5   | 7.0    | 7.6   | 6.2   | 7.3   | 7.5   |  | 0.95 | 6.7E-01 |
| B035DRAFT_00998 | AraC-type DNA-binding domain-containing proteins                              | 5.2   | 5.2    | 7.1   | 5.1   | 2.6   | 5.8   |  | 0.74 | 5.3E-01 |
| B035DRAFT_00999 | Beta-galactosidase/beta-glucuronidase (GH2)                                   | 8.5   | 6.9    | 6.6   | 5.1   | 4.6   | 5.6   |  | 0.70 | 1.2E-01 |
| B035DRAFT_01000 | hypothetical protein                                                          | 5.3   | 5.2    | 4.5   | 2.8   | 3.0   | 4.2   |  | 0.66 | 1.7E-01 |
| B035DRAFT_01001 | Arabinose efflux permease                                                     | 1.8   | 4.4    | 2.2   | 1.7   | 3.0   | 2.1   |  | 0.84 | 7.6E-01 |
| B035DRAFT_01002 | AraC-type DNA-binding domain-containing proteins                              | 42.4  | 58.8   | 49.7  | 63.3  | 63.3  | 81.2  |  | 1.38 | 2.1E-01 |
| B035DRAFT_01003 | Uncharacterized protein conserved in bacteria                                 | 35.6  | 43.2   | 44.0  | 38.7  | 41.7  | 50.1  |  | 1.06 | 7.6E-01 |
| B035DRAFT_01004 | Carbon starvation protein, predicted membrane protein                         | 61.6  | 60.9   | 67.2  | 59.0  | 62.4  | 73.5  |  | 1.02 | 8.7E-01 |
| B035DRAFT_01005 | hypothetical protein                                                          | 62.4  | 64.6   | 51.9  | 39.3  | 41.4  | 47.7  |  | 0.72 | 1.1E-01 |
| B035DRAFT_01006 | hypothetical protein                                                          | 165.1 | 196.0  | 167.5 | 120.0 | 132.3 | 134.5 |  | 0.73 | 7.0E-02 |
| B035DRAFT_01007 | N-acetyl-beta-hexosaminidase( EC:3.2.1.52 ) (GH20)                            | 95.4  | 93.2   | 81.7  | 81.0  | 123.2 | 137.6 |  | 1.24 | 4.9E-01 |
| B035DRAFT_01008 | Exonuclease III                                                               | 57.1  | 59.5   | 63.5  | 70.0  | 85.8  | 88.9  |  | 1.35 | 1.1E-01 |
| B035DRAFT_01009 | excinuclease ABC, A subunit                                                   | 76.7  | 71.4   | 72.9  | 92.1  | 88.0  | 86.2  |  | 1.20 | 3.8E-02 |
| B035DRAFT_01010 | Uncharacterized protein conserved in bacteria                                 | 146.2 | 149.8  | 142.8 | 153.0 | 153.8 | 133.7 |  | 1.00 | 9.8E-01 |
| B035DRAFT_01011 | ResB protein required for cytochrome c biosynthesis                           | 183.4 | 195.9  | 180.7 | 143.1 | 126.0 | 154.7 |  | 0.75 | 8.2E-02 |
| B035DRAFT_01012 | Cytochrome c biogenesis factor                                                | 165.5 | 148.9  | 125.5 | 97.1  | 89.8  | 101.4 |  | 0.66 | 7.0E-02 |
| B035DRAFT_01013 | Cytochrome c peroxidase( EC:1.11.1.5 )                                        | 229.0 | 178.8  | 146.7 | 109.7 | 122.2 | 104.7 |  | 0.62 | 1.2E-01 |
| B035DRAFT_01014 | Chromate transport protein ChrA                                               | 98.8  | 110.7  | 106.9 | 73.2  | 62.0  | 67.0  |  | 0.64 | 2.5E-02 |
| B035DRAFT_01015 | Chromate transport protein ChrA                                               | 137.2 | 180.3  | 184.2 | 138.6 | 116.0 | 130.3 |  | 0.77 | 2.3E-01 |
| B035DRAFT_01016 | Signal transduction histidine kinase                                          | 138.3 | 151.5  | 139.6 | 122.1 | 96.2  | 121.2 |  | 0.79 | 1.7E-01 |
| B035DRAFT_01017 | phosphoribosylformylglycinamide synthase, single chain form( EC:6.3.5.3 )     | 497.7 | 491.0  | 474.7 | 465.4 | 500.1 | 513.8 |  | 1.01 | 8.8E-01 |
| B035DRAFT_01018 | Putative threonine efflux protein                                             | 149.0 | 161.3  | 162.0 | 161.1 | 151.5 | 122.8 |  | 0.92 | 5.8E-01 |
| B035DRAFT_01019 | hypothetical protein                                                          | 152.1 | 174.3  | 148.8 | 150.6 | 161.3 | 176.1 |  | 1.03 | 8.4E-01 |
| B035DRAFT_01020 | dTDP-4-dehydrorhamnose reductase( EC:1.1.1.133 )                              | 228.6 | 239.4  | 220.4 | 208.1 | 218.3 | 195.6 |  | 0.90 | 2.1E-01 |
| B035DRAFT_01021 | peptide chain release factor 3                                                | 250.0 | 245.0  | 247.1 | 235.5 | 235.8 | 245.3 |  | 0.97 | 2.3E-01 |
| B035DRAFT_01022 | hypothetical protein                                                          | 68.1  | 65.5   | 66.7  | 79.5  | 85.8  | 81.1  |  | 1.23 | 2.2E-02 |
| B035DRAFT_01023 | Predicted transcriptional regulator                                           | 58.6  | 68.7   | 59.5  | 74.5  | 101.2 | 103.2 |  | 1.48 | 1.4E-01 |
| B035DRAFT_01024 | TonB family C-terminal domain                                                 | 86.2  | 94.2   | 85.7  | 132.3 | 118.4 | 114.5 |  | 1.37 | 4.5E-02 |
| B035DRAFT_01025 | Tetratricopeptide repeat.                                                     | 66.2  | 72.4   | 65.3  | 91.0  | 77.6  | 96.7  |  | 1.30 | 1.2E-01 |
| B035DRAFT_01026 | hypothetical protein                                                          | 95.2  | 102.2  | 96.7  | 103.4 | 128.8 | 150.9 |  | 1.29 | 2.5E-01 |
| B035DRAFT_01027 | Alpha-L-fucosidase( EC:3.2.1.51 ) (GH29)                                      | 145.5 | 150.5  | 139.8 | 144.7 | 149.8 | 153.3 |  | 1.03 | 5.8E-01 |

|                 |                                                                                                                                       |        |        |        |        |       |        |      |         |
|-----------------|---------------------------------------------------------------------------------------------------------------------------------------|--------|--------|--------|--------|-------|--------|------|---------|
| B035DRAFT_01028 | tRNA dimethylallyltransferase( EC:2.5.1.75 )                                                                                          | 107.9  | 116.1  | 96.3   | 110.7  | 117.0 | 124.6  | 1.10 | 4.1E-01 |
| B035DRAFT_01029 | Plasmid pRiA4b ORF-3-like protein.                                                                                                    | 714.8  | 780.6  | 707.9  | 834.9  | 851.9 | 913.5  | 1.18 | 9.4E-02 |
| B035DRAFT_01030 | acyl-[acyl-carrier-protein]-UDP-N-acetylglucosamine O-acyltransferase( EC:2.3.1.129 )                                                 | 463.4  | 522.4  | 495.1  | 492.3  | 489.1 | 432.4  | 0.95 | 6.4E-01 |
| B035DRAFT_01031 | UDP-3-O-acyl N-acetylglucosamine deacetylase/beta-hydroxyacyl-[acyl carrier protein] dehydratase FabZ( EC:3.5.1. ) (CE11)             | 411.7  | 419.2  | 398.9  | 401.1  | 427.6 | 441.6  | 1.03 | 5.8E-01 |
| B035DRAFT_01032 | UDP-3-O-[3-hydroxymyristoyl] glucosamine N-acyltransferase( EC:2.3.1. )                                                               | 343.5  | 362.9  | 350.3  | 345.6  | 357.7 | 363.2  | 1.01 | 8.3E-01 |
| B035DRAFT_01033 | HD superfamily phosphohydrolases                                                                                                      | 143.5  | 156.0  | 148.5  | 120.7  | 143.0 | 153.9  | 0.93 | 5.9E-01 |
| B035DRAFT_01034 | orotidine 5"-phosphate decarboxylase, subfamily 2( EC:4.1.1.23 )                                                                      | 293.8  | 301.8  | 282.3  | 271.6  | 284.2 | 320.8  | 1.00 | 9.8E-01 |
| B035DRAFT_01035 | peptide chain release factor 1                                                                                                        | 331.5  | 282.1  | 299.0  | 310.3  | 304.3 | 187.9  | 0.86 | 6.2E-01 |
| B035DRAFT_01036 | hypothetical protein                                                                                                                  | 268.9  | 297.0  | 286.9  | 266.0  | 296.0 | 306.4  | 1.02 | 8.7E-01 |
| B035DRAFT_01037 | Phosphoribosylaminoimidazole (AIR) synthetase( EC:6.3.3.1 )                                                                           | 379.5  | 345.7  | 331.1  | 340.5  | 358.2 | 272.0  | 0.91 | 6.0E-01 |
| B035DRAFT_01038 | Predicted permease                                                                                                                    | 258.9  | 281.8  | 286.6  | 265.3  | 182.6 | 215.3  | 0.79 | 2.9E-01 |
| B035DRAFT_01039 | Tetratricopeptide repeat./Coatomer epsilon subunit.                                                                                   | 140.1  | 144.5  | 136.4  | 123.0  | 138.5 | 134.8  | 0.94 | 4.0E-01 |
| B035DRAFT_01040 | N-acetyl-beta-hexosaminidase( EC:3.2.1.35 ) (GH84)                                                                                    | 124.9  | 126.0  | 132.5  | 118.3  | 141.3 | 127.5  | 1.01 | 9.5E-01 |
| B035DRAFT_01041 | ATP-dependent DNA helicase, RecQ family( EC:3.6.4.12 )                                                                                | 155.4  | 169.5  | 156.8  | 152.2  | 150.5 | 139.2  | 0.92 | 2.6E-01 |
| B035DRAFT_01042 | single-stranded-DNA-specific exonuclease RecJ( EC:3.1. )                                                                              | 476.5  | 494.2  | 463.9  | 500.7  | 509.7 | 563.4  | 1.10 | 2.6E-01 |
| B035DRAFT_01043 | Aminopeptidase C                                                                                                                      | 729.5  | 710.1  | 609.0  | 498.5  | 599.7 | 677.2  | 0.86 | 4.4E-01 |
| B035DRAFT_01044 | Xaa-Pro aminopeptidase( EC:3.4.11.9 )                                                                                                 | 314.4  | 319.9  | 304.9  | 323.1  | 352.6 | 389.9  | 1.13 | 2.6E-01 |
| B035DRAFT_01045 | Arylsulfatase A and related enzymes                                                                                                   | 20.2   | 20.3   | 17.8   | 27.4   | 30.2  | 33.4   | 1.56 | 4.2E-02 |
| B035DRAFT_01046 | Predicted esterase of the alpha-beta hydrolase superfamily                                                                            | 238.9  | 207.2  | 230.1  | 167.2  | 141.3 | 112.4  | 0.62 | 9.7E-02 |
| B035DRAFT_01047 | Subtilisin-like serine proteases                                                                                                      | 112.2  | 100.5  | 113.0  | 88.1   | 96.7  | 66.2   | 0.76 | 2.5E-01 |
| B035DRAFT_01048 | hypothetical protein                                                                                                                  | 151.5  | 142.9  | 157.4  | 128.5  | 135.2 | 84.8   | 0.76 | 3.3E-01 |
| B035DRAFT_01049 | hypothetical protein                                                                                                                  | 47.6   | 47.4   | 47.7   | 39.2   | 42.8  | 46.5   | 0.90 | 2.6E-01 |
| B035DRAFT_01050 | hypothetical protein                                                                                                                  | 53.4   | 57.5   | 50.8   | 52.9   | 52.1  | 63.2   | 1.04 | 7.8E-01 |
| B035DRAFT_01051 | conserved hypothetical protein YmdA/YtgF                                                                                              | 909.1  | 958.7  | 907.5  | 909.6  | 871.9 | 824.8  | 0.94 | 3.2E-01 |
| B035DRAFT_01052 | Cell division protein ZapA.                                                                                                           | 208.6  | 307.9  | 258.7  | 316.9  | 339.6 | 479.4  | 1.46 | 2.6E-01 |
| B035DRAFT_01053 | hypothetical protein                                                                                                                  | 309.4  | 372.2  | 352.3  | 456.2  | 420.7 | 524.7  | 1.35 | 1.2E-01 |
| B035DRAFT_01054 | 6-pyruvoyl-tetrahydropterin synthase( EC:4.2.3.12 )                                                                                   | 210.5  | 242.9  | 209.9  | 280.9  | 275.9 | 247.6  | 1.21 | 1.5E-01 |
| B035DRAFT_01055 | Organic radical activating enzymes                                                                                                    | 260.2  | 296.3  | 305.3  | 331.9  | 307.7 | 369.7  | 1.17 | 2.7E-01 |
| B035DRAFT_01056 | ( tRNA )                                                                                                                              | 90.0   | 121.4  | 116.3  | 94.8   | 96.7  | 83.8   | 0.85 | 3.8E-01 |
| B035DRAFT_01057 | G:T/U mismatch-specific DNA glycosylase                                                                                               | 127.1  | 142.8  | 139.5  | 116.8  | 135.3 | 165.7  | 1.01 | 9.6E-01 |
| B035DRAFT_01058 | hypothetical protein                                                                                                                  | 214.2  | 244.3  | 206.9  | 216.1  | 219.1 | 261.3  | 1.05 | 7.7E-01 |
| B035DRAFT_01059 | amino acid carrier protein                                                                                                            | 97.8   | 95.7   | 91.3   | 88.2   | 78.3  | 74.8   | 0.85 | 1.5E-01 |
| B035DRAFT_01060 | Predicted transcriptional regulator containing an HTH domain and an uncharacterized domain shared with the mammalian protein Schlafen | 17.1   | 21.0   | 13.3   | 12.5   | 17.2  | 12.3   | 0.82 | 5.2E-01 |
| B035DRAFT_01061 | Predicted periplasmic ligand-binding sensor domain                                                                                    | 18.5   | 21.3   | 18.6   | 16.9   | 20.4  | 19.8   | 0.97 | 8.6E-01 |
| B035DRAFT_01062 | Predicted acetyltransferase                                                                                                           | 1495.2 | 1396.6 | 1357.0 | 1605.6 | 968.7 | 1008.5 | 0.82 | 5.1E-01 |
| B035DRAFT_01063 | Uncharacterized conserved protein                                                                                                     | 400.9  | 400.8  | 378.6  | 351.8  | 298.0 | 370.8  | 0.86 | 2.7E-01 |
| B035DRAFT_01064 | Thiol:disulfide interchange protein                                                                                                   | 239.1  | 226.7  | 240.3  | 286.2  | 259.7 | 354.3  | 1.26 | 2.2E-01 |
| B035DRAFT_01065 | AraC-type DNA-binding domain-containing proteins                                                                                      | 19.6   | 32.2   | 27.0   | 28.5   | 26.3  | 32.3   | 1.12 | 6.9E-01 |
| B035DRAFT_01066 | ( tRNA )                                                                                                                              | 105.2  | 138.6  | 176.5  | 120.2  | 66.1  | 31.8   | 0.46 | 3.2E-01 |
| B035DRAFT_01067 | hypothetical protein                                                                                                                  | 68.9   | 60.6   | 75.0   | 64.9   | 63.4  | 38.1   | 0.79 | 4.9E-01 |
| B035DRAFT_01068 | hypothetical protein                                                                                                                  | 12.8   | 10.2   | 16.0   | 9.0    | 9.4   | 6.0    | 0.62 | 2.3E-01 |
| B035DRAFT_01069 | hypothetical protein                                                                                                                  | 9.0    | 6.9    | 12.3   | 5.1    | 3.0   | 2.0    | 0.35 | 1.3E-01 |
| B035DRAFT_01070 | hypothetical protein                                                                                                                  | 5.3    | 5.8    | 6.9    | 3.2    | 2.9   | 2.1    | 0.45 | 5.1E-02 |
| B035DRAFT_01071 | hypothetical protein                                                                                                                  | 3.3    | 3.2    | 4.1    | 0.6    | 3.5   | 1.0    | 0.36 | 3.2E-01 |
| B035DRAFT_01072 | hypothetical protein                                                                                                                  | 4.5    | 5.2    | 5.5    | 0.8    | 1.7   | 0.3    | 0.15 | 9.4E-02 |
| B035DRAFT_01073 | hypothetical protein                                                                                                                  | 7.6    | 3.1    | 4.8    | 3.5    | 1.8   | 0.6    | 0.32 | 3.1E-01 |
| B035DRAFT_01074 | hypothetical protein                                                                                                                  | 4.9    | 3.6    | 4.2    | 4.4    | 3.5   | 1.9    | 0.73 | 5.1E-01 |
| B035DRAFT_01075 | hypothetical protein                                                                                                                  | 6.3    | 3.9    | 8.7    | 2.2    | 3.8   | 1.9    | 0.42 | 1.9E-01 |





|                 |                                                                                                         |        |        |        |        |        |        |      |         |
|-----------------|---------------------------------------------------------------------------------------------------------|--------|--------|--------|--------|--------|--------|------|---------|
| B035DRAFT_01123 | Type III restriction enzyme, res subunit./Type I restriction enzyme R protein N terminus (HSDR_N).      | 241.2  | 245.5  | 232.3  | 275.0  | 281.2  | 261.5  | 1.14 | 7.0E-02 |
| B035DRAFT_01124 | hypothetical protein                                                                                    | 113.4  | 144.4  | 122.0  | 125.0  | 148.2  | 153.5  | 1.13 | 5.0E-01 |
| B035DRAFT_01125 | hypothetical protein                                                                                    | 242.5  | 231.7  | 190.0  | 225.8  | 277.4  | 287.3  | 1.19 | 3.8E-01 |
| B035DRAFT_01126 | hypothetical protein                                                                                    | 246.3  | 236.4  | 217.0  | 269.2  | 275.8  | 326.2  | 1.24 | 1.6E-01 |
| B035DRAFT_01127 | Restriction endonuclease S subunits                                                                     | 237.7  | 245.5  | 205.8  | 242.4  | 285.8  | 325.5  | 1.23 | 2.8E-01 |
| B035DRAFT_01128 | Restriction endonuclease S subunits                                                                     | 215.3  | 226.5  | 216.6  | 205.8  | 249.4  | 291.4  | 1.12 | 5.3E-01 |
| B035DRAFT_01129 | Type I restriction-modification system methyltransferase subunit( EC:2.1.1.72 )                         | 360.0  | 320.3  | 328.9  | 358.4  | 371.5  | 293.4  | 1.01 | 9.5E-01 |
| B035DRAFT_01130 | Predicted transcription factor, homolog of eukaryotic MBF1                                              | 135.6  | 130.0  | 130.3  | 146.1  | 150.3  | 131.2  | 1.08 | 3.5E-01 |
| B035DRAFT_01131 | Site-specific recombinase XerD                                                                          | 427.7  | 460.1  | 435.4  | 488.6  | 460.3  | 519.7  | 1.11 | 2.2E-01 |
| B035DRAFT_01132 | hypothetical protein                                                                                    | 94.4   | 95.8   | 84.9   | 85.8   | 85.4   | 111.1  | 1.02 | 9.2E-01 |
| B035DRAFT_01133 | tRNA modification GTPase TrmE( EC:3.6.)                                                                 | 213.3  | 206.9  | 208.4  | 181.6  | 183.9  | 223.6  | 0.93 | 5.7E-01 |
| B035DRAFT_01134 | GAF domain-containing protein                                                                           | 169.3  | 149.1  | 154.0  | 130.3  | 129.8  | 174.1  | 0.91 | 6.3E-01 |
| B035DRAFT_01135 | Uridine phosphorylase( EC:2.4.2.3 )                                                                     | 210.7  | 198.6  | 195.8  | 182.8  | 192.9  | 247.0  | 1.02 | 9.2E-01 |
| B035DRAFT_01136 | Uncharacterized protein conserved in bacteria                                                           | 132.4  | 135.0  | 145.5  | 139.9  | 151.9  | 175.0  | 1.13 | 3.7E-01 |
| B035DRAFT_01137 | Membrane-bound serine protease (ClpP class)                                                             | 56.3   | 73.8   | 76.0   | 80.2   | 66.4   | 108.9  | 1.22 | 5.2E-01 |
| B035DRAFT_01138 | Uncharacterized protein conserved in bacteria                                                           | 95.3   | 105.6  | 90.2   | 149.1  | 171.0  | 187.9  | 1.74 | 3.3E-02 |
| B035DRAFT_01139 | Predicted ATPase of the PP-loop superfamily implicated in cell cycle control                            | 112.4  | 120.6  | 115.7  | 96.4   | 103.3  | 88.4   | 0.82 | 1.0E-01 |
| B035DRAFT_01140 | Uncharacterized protein conserved in bacteria                                                           | 36.5   | 37.8   | 38.6   | 17.5   | 21.6   | 39.6   | 0.66 | 3.6E-01 |
| B035DRAFT_01141 | Uncharacterized protein conserved in bacteria                                                           | 39.5   | 53.8   | 50.3   | 37.8   | 38.3   | 42.5   | 0.83 | 3.3E-01 |
| B035DRAFT_01142 | hypothetical protein                                                                                    | 22.1   | 23.7   | 21.8   | 22.2   | 23.7   | 29.3   | 1.11 | 5.2E-01 |
| B035DRAFT_01143 | hypothetical protein                                                                                    | 14.9   | 18.0   | 20.0   | 14.2   | 17.6   | 19.0   | 0.96 | 8.6E-01 |
| B035DRAFT_01144 | hypothetical protein                                                                                    | 11.0   | 21.6   | 19.2   | 10.5   | 14.3   | 17.8   | 0.84 | 7.1E-01 |
| B035DRAFT_01145 | Site-specific recombinase XerD                                                                          | 6.0    | 6.3    | 6.3    | 2.7    | 2.6    | 4.4    | 0.51 | 9.7E-02 |
| B035DRAFT_01146 | DNA repair proteins                                                                                     | 6.8    | 7.0    | 4.6    | 0.4    | 2.4    | 2.7    | 0.23 | 2.4E-01 |
| B035DRAFT_01147 | hypothetical protein                                                                                    | 7.9    | 7.3    | 9.3    | 7.8    | 7.2    | 6.0    | 0.86 | 4.2E-01 |
| B035DRAFT_01148 | hypothetical protein                                                                                    | 6.2    | 3.6    | 3.3    | 5.0    | 4.1    | 3.8    | 1.02 | 9.7E-01 |
| B035DRAFT_01149 | hypothetical protein                                                                                    | 5.8    | 6.7    | 6.1    | 4.3    | 5.9    | 6.6    | 0.89 | 6.4E-01 |
| B035DRAFT_01150 | hypothetical protein                                                                                    | 27.5   | 31.7   | 30.3   | 42.8   | 39.6   | 54.2   | 1.52 | 9.4E-02 |
| B035DRAFT_01151 | Site-specific recombinases, DNA invertase Pin homologs                                                  | 12.9   | 15.3   | 12.0   | 13.3   | 15.2   | 16.7   | 1.12 | 5.0E-01 |
| B035DRAFT_01152 | hypothetical protein                                                                                    | 50.5   | 64.2   | 46.2   | 80.4   | 84.9   | 93.2   | 1.62 | 7.7E-02 |
| B035DRAFT_01153 | glutamate synthase (NADPH), homotetrameric( EC:1.4.1.13,EC:1.4.1.14 )                                   | 205.1  | 219.5  | 193.7  | 204.8  | 213.9  | 170.9  | 0.95 | 7.3E-01 |
| B035DRAFT_01154 | seryl-tRNA synthetase( EC:6.1.1.11 )                                                                    | 476.6  | 494.2  | 448.7  | 472.8  | 478.8  | 508.7  | 1.03 | 6.6E-01 |
| B035DRAFT_01155 | nicotinamide mononucleotide transporter PnuC                                                            | 20.1   | 21.9   | 16.8   | 12.0   | 20.1   | 16.1   | 0.81 | 4.8E-01 |
| B035DRAFT_01156 | thiamine pyrophosphokinase( EC:2.7.6.2 )                                                                | 73.8   | 74.4   | 61.1   | 55.1   | 70.5   | 75.6   | 0.96 | 8.5E-01 |
| B035DRAFT_01157 | hypothetical protein                                                                                    | 167.2  | 197.0  | 211.9  | 169.9  | 170.5  | 224.7  | 0.98 | 9.2E-01 |
| B035DRAFT_01158 | ribosomal protein L27                                                                                   | 3902.5 | 4172.7 | 3717.9 | 3861.6 | 3780.0 | 4075.3 | 0.99 | 9.4E-01 |
| B035DRAFT_01159 | ribosomal protein L21                                                                                   | 3533.6 | 3800.7 | 3239.7 | 3663.9 | 3339.4 | 3061.3 | 0.95 | 6.9E-01 |
| B035DRAFT_01160 | haloacid dehalogenase superfamily, subfamily IA, variant 1 with third motif having Dx(3-4)D or Dx(3-4)E | 30.6   | 37.1   | 37.8   | 50.0   | 46.1   | 56.1   | 1.44 | 8.8E-02 |
| B035DRAFT_01161 | Cell wall-associated hydrolases (invasion-associated proteins)                                          | 61.8   | 78.5   | 103.4  | 128.0  | 98.3   | 128.1  | 1.48 | 2.5E-01 |
| B035DRAFT_01162 | ABC-type multidrug transport system, ATPase component                                                   | 72.2   | 88.7   | 85.3   | 89.8   | 84.2   | 93.9   | 1.09 | 4.9E-01 |
| B035DRAFT_01163 | hypothetical protein                                                                                    | 83.9   | 96.5   | 99.9   | 102.7  | 94.7   | 121.6  | 1.14 | 4.4E-01 |
| B035DRAFT_01164 | Predicted Zn-dependent peptidases( EC:3.4.24.)                                                          | 253.2  | 232.2  | 229.5  | 249.3  | 223.0  | 244.4  | 1.00 | 9.8E-01 |
| B035DRAFT_01165 | thioredoxin-disulfide reductase( EC:1.8.1.9 )                                                           | 787.4  | 764.1  | 671.7  | 838.7  | 660.8  | 595.8  | 0.93 | 7.5E-01 |
| B035DRAFT_01166 | Outer membrane lipoprotein-sorting protein                                                              | 225.0  | 202.4  | 177.6  | 193.7  | 170.2  | 182.1  | 0.91 | 4.8E-01 |
| B035DRAFT_01167 | DNA segregation ATPase FtsK/SpolIIE and related proteins                                                | 155.4  | 148.1  | 150.4  | 147.6  | 141.9  | 149.9  | 0.97 | 4.1E-01 |
| B035DRAFT_01168 | hypothetical protein                                                                                    | 205.0  | 213.1  | 196.3  | 233.1  | 244.3  | 276.9  | 1.23 | 1.2E-01 |
| B035DRAFT_01169 | Ribonuclease D                                                                                          | 292.4  | 272.2  | 276.8  | 334.8  | 310.0  | 335.2  | 1.16 | 7.6E-02 |

|                 |                                                                                                                                                         |        |        |        |        |        |         |  |      |         |
|-----------------|---------------------------------------------------------------------------------------------------------------------------------------------------------|--------|--------|--------|--------|--------|---------|--|------|---------|
| B035DRAFT_01170 | Predicted SAM-dependent methyltransferases( EC:2.1.1.)                                                                                                  | 369.4  | 393.9  | 361.3  | 430.4  | 446.5  | 484.7   |  | 1.21 | 8.2E-02 |
| B035DRAFT_01171 | hypothetical protein                                                                                                                                    | 500.4  | 491.1  | 487.5  | 495.9  | 565.8  | 561.2   |  | 1.10 | 2.8E-01 |
| B035DRAFT_01172 | Transglutaminase-like enzymes, putative cysteine proteases                                                                                              | 348.4  | 346.3  | 349.5  | 359.1  | 400.0  | 365.7   |  | 1.08 | 2.6E-01 |
| B035DRAFT_01173 | Transglutaminase-like enzymes, putative cysteine proteases                                                                                              | 326.0  | 328.2  | 334.0  | 345.5  | 366.7  | 368.5   |  | 1.09 | 9.2E-02 |
| B035DRAFT_01174 | RNA polymerase sigma factor, sigma-70 family                                                                                                            | 223.2  | 210.6  | 168.4  | 270.0  | 365.9  | 222.6   |  | 1.41 | 2.9E-01 |
| B035DRAFT_01175 | hypothetical protein                                                                                                                                    | 195.6  | 194.5  | 136.6  | 206.0  | 335.7  | 242.0   |  | 1.48 | 2.8E-01 |
| B035DRAFT_01176 | hypothetical protein                                                                                                                                    | 539.5  | 534.8  | 475.6  | 883.9  | 1084.1 | 1033.5  |  | 1.93 | 1.9E-02 |
| B035DRAFT_01177 | Nucleoside H+ symporter.                                                                                                                                | 166.0  | 182.5  | 179.0  | 208.6  | 202.7  | 237.6   |  | 1.23 | 1.2E-01 |
| B035DRAFT_01178 | Uncharacterized conserved protein                                                                                                                       | 129.0  | 131.6  | 150.8  | 118.9  | 117.7  | 121.0   |  | 0.87 | 1.8E-01 |
| B035DRAFT_01179 | RNA methyltransferase, RsmE family( EC:2.1.1.)                                                                                                          | 122.5  | 131.7  | 125.3  | 111.7  | 109.1  | 113.7   |  | 0.88 | 6.1E-02 |
| B035DRAFT_01180 | hypothetical protein                                                                                                                                    | 231.6  | 239.1  | 239.1  | 196.1  | 213.2  | 219.9   |  | 0.89 | 1.3E-01 |
| B035DRAFT_01181 | ABC-type antimicrobial peptide transport system, ATPase component                                                                                       | 172.6  | 173.5  | 175.9  | 149.4  | 149.8  | 177.3   |  | 0.91 | 3.7E-01 |
| B035DRAFT_01182 | hypothetical protein                                                                                                                                    | 202.5  | 198.6  | 202.8  | 190.2  | 194.1  | 202.8   |  | 0.97 | 4.3E-01 |
| B035DRAFT_01183 | NAD-dependent aldehyde dehydrogenases( EC:1.5.99.8,EC:1.5.1.12 )                                                                                        | 57.2   | 62.4   | 60.8   | 62.7   | 68.5   | 69.5    |  | 1.11 | 2.0E-01 |
| B035DRAFT_01184 | Predicted transcriptional regulator                                                                                                                     | 46.5   | 38.9   | 47.6   | 42.6   | 43.0   | 44.8    |  | 0.98 | 9.0E-01 |
| B035DRAFT_01185 | Antirepressor regulating drug resistance, predicted signal transduction N-terminal membrane component                                                   | 45.9   | 38.8   | 36.4   | 40.9   | 45.3   | 37.5    |  | 1.02 | 9.0E-01 |
| B035DRAFT_01186 | Response regulator of the LytR/AlgR family                                                                                                              | 32.7   | 26.4   | 25.8   | 23.0   | 28.9   | 25.8    |  | 0.92 | 6.4E-01 |
| B035DRAFT_01187 | Putative regulator of cell autolysis                                                                                                                    | 23.7   | 22.4   | 19.4   | 18.8   | 24.2   | 23.6    |  | 1.02 | 9.4E-01 |
| B035DRAFT_01188 | Outer membrane protein                                                                                                                                  | 16.9   | 13.9   | 17.8   | 20.8   | 20.1   | 22.6    |  | 1.31 | 1.5E-01 |
| B035DRAFT_01189 | hypothetical protein                                                                                                                                    | 5.2    | 9.7    | 8.9    | 9.9    | 6.6    | 8.5     |  | 1.07 | 8.7E-01 |
| B035DRAFT_01190 | Cation/multidrug efflux pump                                                                                                                            | 10.2   | 9.7    | 9.3    | 9.1    | 10.8   | 9.1     |  | 0.99 | 9.5E-01 |
| B035DRAFT_01191 | RND family efflux transporter, MFP subunit                                                                                                              | 8.7    | 10.5   | 11.4   | 5.9    | 5.5    | 7.6     |  | 0.62 | 1.1E-01 |
| B035DRAFT_01192 | Dehydrogenases with different specificities (related to short-chain alcohol dehydrogenases)                                                             | 115.3  | 123.3  | 107.0  | 106.5  | 124.3  | 155.9   |  | 1.11 | 6.4E-01 |
| B035DRAFT_01193 | GMP synthase (glutamine-hydrolyzing), C-terminal domain or B subunit/GMP synthase (glutamine-hydrolyzing), N-terminal domain or A subunit( EC:6.3.5.2 ) | 682.1  | 692.2  | 651.8  | 564.0  | 608.4  | 641.9   |  | 0.89 | 2.0E-01 |
| B035DRAFT_01194 | large conductance mechanosensitive channel protein                                                                                                      | 154.8  | 176.0  | 156.5  | 122.6  | 108.6  | 132.1   |  | 0.74 | 8.6E-02 |
| B035DRAFT_01195 | glyceraldehyde-3-phosphate dehydrogenase, type I( EC:1.2.1.12 )                                                                                         | 8386.7 | 9799.5 | 9316.0 | 8914.9 | 9857.7 | 12350.7 |  | 1.12 | 5.4E-01 |
| B035DRAFT_01196 | TM2 domain.                                                                                                                                             | 315.7  | 362.3  | 296.1  | 278.4  | 303.1  | 369.6   |  | 0.97 | 8.9E-01 |
| B035DRAFT_01197 | Protein of unknown function (DUF2752).                                                                                                                  | 106.5  | 123.8  | 113.5  | 97.7   | 102.5  | 112.3   |  | 0.91 | 3.9E-01 |
| B035DRAFT_01198 | hypothetical protein                                                                                                                                    | 74.9   | 79.1   | 69.5   | 48.2   | 63.5   | 72.9    |  | 0.82 | 3.8E-01 |
| B035DRAFT_01199 | Peptidase family M48.                                                                                                                                   | 94.3   | 90.0   | 77.0   | 48.4   | 81.4   | 77.6    |  | 0.78 | 4.3E-01 |
| B035DRAFT_01200 | tRNA dimethylallyltransferase( EC:2.5.1.75 )                                                                                                            | 167.1  | 157.7  | 148.2  | 133.0  | 167.0  | 143.1   |  | 0.93 | 6.2E-01 |
| B035DRAFT_01201 | lipid kinase, YegS/Rv2252/BmrU family                                                                                                                   | 132.6  | 117.2  | 111.2  | 82.0   | 135.7  | 111.3   |  | 0.89 | 7.0E-01 |
| B035DRAFT_01202 | 3-deoxy-8-phosphooctulonate synthase( EC:2.5.1.55 )                                                                                                     | 247.8  | 220.1  | 229.7  | 177.8  | 238.6  | 215.8   |  | 0.90 | 5.3E-01 |
| B035DRAFT_01203 | Protein distantly related to bacterial ferritins                                                                                                        | 1670.5 | 1575.9 | 1592.3 | 1777.2 | 1404.1 | 1574.1  |  | 0.98 | 8.8E-01 |
| B035DRAFT_01204 | Cbb3-type cytochrome oxidase component FixQ.                                                                                                            | 666.9  | 649.4  | 673.1  | 575.3  | 335.3  | 435.5   |  | 0.66 | 2.0E-01 |
| B035DRAFT_01205 | cAMP-binding proteins - catabolite gene activator and regulatory subunit of cAMP-dependent protein kinases                                              | 149.4  | 201.7  | 179.2  | 178.6  | 181.5  | 212.8   |  | 1.08 | 6.7E-01 |
| B035DRAFT_01206 | Uncharacterized protein related to glutamine synthetase( EC:6.3.1.2 )                                                                                   | 120.1  | 137.4  | 125.4  | 150.2  | 169.2  | 174.1   |  | 1.29 | 8.6E-02 |
| B035DRAFT_01207 | N-acetyl-beta-hexosaminidase( EC:3.2.1.52 ) (GH20)                                                                                                      | 30.8   | 35.8   | 34.1   | 34.0   | 39.3   | 35.5    |  | 1.08 | 4.8E-01 |
| B035DRAFT_01208 | hypothetical protein                                                                                                                                    | 24.7   | 29.7   | 31.0   | 38.5   | 42.2   | 42.1    |  | 1.44 | 6.6E-02 |
| B035DRAFT_01209 | Outer membrane protein                                                                                                                                  | 218.9  | 178.9  | 193.1  | 133.4  | 111.6  | 127.7   |  | 0.63 | 4.7E-02 |
| B035DRAFT_01210 | Multidrug resistance efflux pump                                                                                                                        | 197.2  | 158.9  | 176.2  | 104.3  | 103.6  | 94.5    |  | 0.57 | 2.3E-02 |
| B035DRAFT_01211 | ABC-type multidrug transport system, permease component                                                                                                 | 167.5  | 148.4  | 192.1  | 110.9  | 103.4  | 120.7   |  | 0.66 | 7.0E-02 |
| B035DRAFT_01212 | ABC-type multidrug transport system, permease component                                                                                                 | 99.4   | 86.2   | 117.2  | 70.6   | 67.9   | 74.4    |  | 0.71 | 1.1E-01 |
| B035DRAFT_01213 | Glycogen debranching enzyme (GH78)                                                                                                                      | 551.2  | 563.9  | 564.7  | 572.7  | 619.2  | 771.1   |  | 1.16 | 3.7E-01 |
| B035DRAFT_01214 | Glycosyltransferase (GT5)                                                                                                                               | 459.9  | 457.1  | 460.2  | 373.4  | 409.1  | 507.1   |  | 0.93 | 6.6E-01 |
| B035DRAFT_01215 | Alpha-amylase/alpha-mannosidase( EC:3.2.1.1 ) (GH57)                                                                                                    | 479.8  | 491.4  | 483.1  | 421.9  | 437.9  | 545.1   |  | 0.96 | 7.9E-01 |

|                 |                                                                                              |       |       |       |       |       |       |      |         |
|-----------------|----------------------------------------------------------------------------------------------|-------|-------|-------|-------|-------|-------|------|---------|
| B035DRAFT_01216 | hypothetical protein                                                                         | 173.0 | 175.2 | 197.3 | 140.1 | 156.0 | 116.8 | 0.75 | 1.6E-01 |
| B035DRAFT_01217 | biotin synthase( EC:2.8.1.6 )                                                                | 29.7  | 23.4  | 29.9  | 4.8   | 4.6   | 3.7   | 0.16 | 3.1E-03 |
| B035DRAFT_01218 | adenosylmethionine-8-amino-7-oxonanoate transaminase( EC:2.6.1.62 )                          | 32.6  | 24.2  | 33.8  | 5.9   | 4.2   | 2.2   | 0.13 | 3.5E-02 |
| B035DRAFT_01219 | 7-keto-8-aminopelargonate synthetase and related enzymes( EC:2.3.1.47 )                      | 42.9  | 31.0  | 38.1  | 6.6   | 6.1   | 2.6   | 0.13 | 3.5E-02 |
| B035DRAFT_01220 | Uncharacterized protein conserved in bacteria                                                | 16.1  | 14.2  | 18.3  | 4.1   | 5.9   | 2.1   | 0.23 | 6.9E-02 |
| B035DRAFT_01221 | biotin biosynthesis protein BioC( EC:2.1.1.197 )                                             | 23.0  | 23.9  | 23.7  | 7.1   | 7.3   | 3.7   | 0.24 | 4.0E-02 |
| B035DRAFT_01222 | dethiobiotin synthase( EC:6.3.3.3 )                                                          | 40.6  | 36.5  | 30.6  | 10.2  | 8.8   | 7.4   | 0.24 | 9.6E-03 |
| B035DRAFT_01223 | hypothetical protein                                                                         | 18.1  | 16.5  | 13.9  | 12.5  | 20.0  | 15.6  | 0.98 | 9.5E-01 |
| B035DRAFT_01224 | Uncharacterized conserved protein                                                            | 124.4 | 145.5 | 138.9 | 102.0 | 102.3 | 102.2 | 0.75 | 4.2E-02 |
| B035DRAFT_01225 | Aspartate ammonia-lyase( EC:4.3.1.1 )                                                        | 564.5 | 397.9 | 526.5 | 738.3 | 535.1 | 610.7 | 1.27 | 3.7E-01 |
| B035DRAFT_01226 | hypothetical protein                                                                         | 164.8 | 154.8 | 135.0 | 167.0 | 203.8 | 187.1 | 1.23 | 2.2E-01 |
| B035DRAFT_01227 | hypothetical protein                                                                         | 83.8  | 93.5  | 86.0  | 86.2  | 103.8 | 107.1 | 1.12 | 4.0E-01 |
| B035DRAFT_01228 | hypothetical protein                                                                         | 49.6  | 48.4  | 34.3  | 33.2  | 57.2  | 68.6  | 1.17 | 7.4E-01 |
| B035DRAFT_01229 | Cyclic nucleotide-binding domain.                                                            | 87.8  | 99.0  | 88.4  | 77.7  | 107.4 | 104.5 | 1.04 | 8.5E-01 |
| B035DRAFT_01230 | hypothetical protein                                                                         | 74.2  | 77.1  | 74.0  | 79.3  | 89.3  | 104.1 | 1.20 | 2.4E-01 |
| B035DRAFT_01231 | hypothetical protein                                                                         | 128.8 | 115.7 | 106.8 | 127.0 | 130.1 | 118.2 | 1.07 | 5.3E-01 |
| B035DRAFT_01232 | Long-chain acyl-CoA synthetases (AMP-forming)( EC:6.2.1.3 )                                  | 66.1  | 67.9  | 58.9  | 65.5  | 79.6  | 80.7  | 1.17 | 3.1E-01 |
| B035DRAFT_01233 | Dihydroorotate dehydrogenase( EC:1.3.98.1 )                                                  | 444.9 | 434.6 | 425.4 | 416.0 | 416.0 | 467.5 | 0.99 | 9.5E-01 |
| B035DRAFT_01234 | pyridoxal phosphate enzyme, YggS family                                                      | 314.9 | 309.7 | 282.4 | 288.7 | 308.3 | 326.6 | 1.02 | 8.5E-01 |
| B035DRAFT_01235 | hypothetical protein                                                                         | 320.0 | 330.5 | 300.9 | 339.5 | 325.9 | 280.3 | 0.99 | 9.5E-01 |
| B035DRAFT_01236 | Protein kinase domain.                                                                       | 37.4  | 44.6  | 48.4  | 86.7  | 88.1  | 104.8 | 2.15 | 2.4E-02 |
| B035DRAFT_01237 | L-fucose isomerase and related proteins                                                      | 110.3 | 119.0 | 118.1 | 276.1 | 282.5 | 349.4 | 2.60 | 7.4E-03 |
| B035DRAFT_01238 | hypothetical protein                                                                         | 337.1 | 237.4 | 193.7 | 330.4 | 304.2 | 246.3 | 1.17 | 6.4E-01 |
| B035DRAFT_01239 | Uncharacterized conserved protein                                                            | 61.6  | 57.2  | 68.7  | 45.1  | 50.4  | 57.2  | 0.81 | 2.3E-01 |
| B035DRAFT_01240 | Aspartate/tyrosine/aromatic aminotransferase( EC:2.6.1.1 )                                   | 320.7 | 351.4 | 341.2 | 318.7 | 359.1 | 324.7 | 0.99 | 9.0E-01 |
| B035DRAFT_01241 | ABC-type transport system, involved in lipoprotein release, permease component               | 217.2 | 226.1 | 227.1 | 184.5 | 213.5 | 196.9 | 0.89 | 1.9E-01 |
| B035DRAFT_01242 | hypothetical protein                                                                         | 24.0  | 24.0  | 19.2  | 15.1  | 24.8  | 21.9  | 0.90 | 7.4E-01 |
| B035DRAFT_01243 | hypothetical protein                                                                         | 25.8  | 18.6  | 25.2  | 15.2  | 19.5  | 23.8  | 0.84 | 5.5E-01 |
| B035DRAFT_01244 | Predicted ATPase (AAA+ superfamily)                                                          | 41.0  | 40.4  | 42.5  | 64.6  | 69.4  | 88.4  | 1.78 | 4.4E-02 |
| B035DRAFT_01245 | Uncharacterized conserved protein                                                            | 260.7 | 304.5 | 251.0 | 311.2 | 281.3 | 342.1 | 1.15 | 3.7E-01 |
| B035DRAFT_01246 | Glycosyltransferases, probably involved in cell wall biogenesis (GT21)                       | 29.8  | 35.3  | 35.7  | 40.7  | 38.9  | 43.8  | 1.23 | 1.6E-01 |
| B035DRAFT_01247 | hypothetical protein                                                                         | 252.2 | 257.2 | 201.5 | 406.2 | 511.9 | 564.1 | 2.08 | 4.6E-02 |
| B035DRAFT_01248 | diaminopimelate decarboxylase( EC:4.1.1.20 )                                                 | 281.2 | 314.6 | 305.4 | 282.9 | 290.4 | 305.5 | 0.98 | 7.4E-01 |
| B035DRAFT_01249 | aspartate kinase( EC:2.7.2.4 )                                                               | 625.8 | 791.6 | 692.0 | 658.4 | 615.8 | 657.5 | 0.92 | 5.1E-01 |
| B035DRAFT_01250 | Predicted ATPase involved in cell division                                                   | 196.2 | 237.0 | 181.2 | 195.0 | 194.5 | 240.8 | 1.03 | 9.0E-01 |
| B035DRAFT_01251 | phosphoribosyl-ATP pyrophosphohydrolase( EC:3.5.4.19,EC:3.6.1.31 )                           | 214.7 | 255.4 | 201.5 | 219.1 | 219.9 | 249.9 | 1.03 | 8.6E-01 |
| B035DRAFT_01252 | imidazoleglycerol phosphate synthase, cyclase subunit( EC:4.1.3.)                            | 168.7 | 182.9 | 188.7 | 156.4 | 163.9 | 121.8 | 0.81 | 2.8E-01 |
| B035DRAFT_01253 | phosphoribosylformimino-5-aminoimidazole carboxamide ribotide isomerase( EC:5.3.1.16 )       | 114.0 | 128.5 | 111.9 | 103.5 | 127.0 | 135.4 | 1.03 | 8.8E-01 |
| B035DRAFT_01254 | imidazole glycerol phosphate synthase, glutamine amidotransferase subunit( EC:2.4.2.)        | 156.3 | 171.4 | 164.9 | 146.8 | 162.2 | 216.4 | 1.05 | 8.2E-01 |
| B035DRAFT_01255 | ( tRNA )                                                                                     | 41.1  | 47.8  | 53.2  | 31.2  | 20.7  | 43.6  | 0.65 | 3.2E-01 |
| B035DRAFT_01256 | Protein of unknown function (DUF2582).                                                       | 72.4  | 93.5  | 93.0  | 170.2 | 155.3 | 176.2 | 1.95 | 2.9E-02 |
| B035DRAFT_01257 | hypothetical protein                                                                         | 58.7  | 70.0  | 67.6  | 75.4  | 78.2  | 84.1  | 1.21 | 1.6E-01 |
| B035DRAFT_01258 | Pantothenate kinase, acetyl-CoA regulated( EC:2.7.1.33 )                                     | 74.1  | 58.9  | 76.9  | 75.7  | 75.1  | 69.6  | 1.06 | 7.4E-01 |
| B035DRAFT_01259 | Domain of unknown function (DUF303).( EC:3.1.1.53 ) (CE6)                                    | 56.2  | 53.6  | 59.4  | 53.5  | 52.1  | 47.2  | 0.90 | 2.8E-01 |
| B035DRAFT_01260 | Membrane-associated phospholipid phosphatase                                                 | 96.6  | 89.4  | 92.2  | 75.8  | 68.0  | 84.1  | 0.82 | 1.6E-01 |
| B035DRAFT_01261 | methionine-R-sulfoxide reductase/methionine-S-sulfoxide reductase( EC:1.8.4.12,EC:1.8.4.11 ) | 140.4 | 116.2 | 112.6 | 141.3 | 124.4 | 140.9 | 1.10 | 5.0E-01 |
| B035DRAFT_01262 | Penicillin V acylase and related amidases( EC:3.5.1.24 )                                     | 332.3 | 299.1 | 334.9 | 240.9 | 161.1 | 147.5 | 0.56 | 1.1E-01 |

|                 |                                                                                             |        |        |        |        |        |        |  |      |         |
|-----------------|---------------------------------------------------------------------------------------------|--------|--------|--------|--------|--------|--------|--|------|---------|
| B035DRAFT_01263 | ( tRNA )                                                                                    | 69.4   | 64.6   | 84.5   | 40.2   | 27.3   | 31.5   |  | 0.45 | 4.7E-02 |
| B035DRAFT_01264 | hypothetical protein                                                                        | 124.3  | 186.6  | 164.2  | 90.6   | 139.7  | 196.1  |  | 0.87 | 7.6E-01 |
| B035DRAFT_01265 | ( rRNA )                                                                                    | 6.5    | 11.9   | 7.7    | 4.1    | 7.9    | 9.3    |  |      | 6.8E-01 |
| B035DRAFT_01266 | hypothetical protein                                                                        | 19.7   | 20.4   | 15.1   | 20.8   | 23.2   | 31.9   |  | 1.36 | 3.1E-01 |
| B035DRAFT_01267 | Archaeal/vacuolar-type H <sup>+</sup> -ATPase subunit E( EC:3.6.3.14 )                      | 354.7  | 405.4  | 392.3  | 542.8  | 553.2  | 661.1  |  | 1.52 | 5.0E-02 |
| B035DRAFT_01268 | Protein of unknown function (DUF2764).                                                      | 261.0  | 289.3  | 279.2  | 319.7  | 359.1  | 411.0  |  | 1.31 | 1.3E-01 |
| B035DRAFT_01269 | Archaeal/vacuolar-type H <sup>+</sup> -ATPase subunit A( EC:3.6.3.14 )                      | 388.0  | 377.3  | 384.6  | 398.6  | 474.7  | 457.7  |  | 1.15 | 2.0E-01 |
| B035DRAFT_01270 | Archaeal/vacuolar-type H <sup>+</sup> -ATPase subunit B( EC:3.6.3.14 )                      | 367.0  | 351.2  | 344.9  | 339.5  | 438.2  | 392.7  |  | 1.10 | 5.1E-01 |
| B035DRAFT_01271 | Archaeal/vacuolar-type H <sup>+</sup> -ATPase subunit D( EC:3.6.3.14 )                      | 376.6  | 360.0  | 348.0  | 360.1  | 458.4  | 433.7  |  | 1.15 | 3.3E-01 |
| B035DRAFT_01272 | Archaeal/vacuolar-type H <sup>+</sup> -ATPase subunit I( EC:3.6.3.14 )                      | 396.4  | 390.8  | 398.7  | 432.5  | 496.9  | 488.3  |  | 1.19 | 9.4E-02 |
| B035DRAFT_01273 | ATP synthase subunit C.( EC:3.6.3.14 )                                                      | 612.8  | 671.0  | 629.5  | 780.1  | 837.4  | 1023.2 |  | 1.37 | 1.1E-01 |
| B035DRAFT_01274 | Glycosyltransferase (GT3)                                                                   | 457.0  | 452.6  | 436.2  | 356.5  | 405.5  | 425.4  |  | 0.88 | 2.4E-01 |
| B035DRAFT_01275 | alpha-glucan phosphorylases( EC:2.4.1.1 ) (GT35)                                            | 918.0  | 904.0  | 893.9  | 762.3  | 855.2  | 898.9  |  | 0.92 | 3.9E-01 |
| B035DRAFT_01276 | Peroxioredoxin                                                                              | 1285.7 | 1265.2 | 1172.9 | 1234.8 | 1242.6 | 1506.5 |  | 1.07 | 6.2E-01 |
| B035DRAFT_01277 | Signal transduction histidine kinase                                                        | 111.3  | 114.6  | 105.7  | 118.0  | 129.1  | 138.6  |  | 1.16 | 1.8E-01 |
| B035DRAFT_01278 | spermidine/putrescine ABC transporter ATP-binding subunit( EC:3.6.3.31 )                    | 236.6  | 241.7  | 221.4  | 228.4  | 235.6  | 212.3  |  | 0.97 | 6.4E-01 |
| B035DRAFT_01279 | ABC-type spermidine/putrescine transport system, permease component I                       | 225.4  | 234.5  | 259.6  | 220.2  | 199.2  | 231.6  |  | 0.90 | 3.8E-01 |
| B035DRAFT_01280 | ABC-type spermidine/putrescine transport system, permease component II                      | 133.5  | 135.1  | 137.6  | 112.3  | 119.5  | 134.5  |  | 0.90 | 3.0E-01 |
| B035DRAFT_01281 | Spermidine/putrescine-binding periplasmic protein                                           | 157.7  | 135.3  | 153.0  | 129.4  | 150.9  | 86.9   |  | 0.80 | 4.8E-01 |
| B035DRAFT_01282 | ribose-phosphate pyrophosphokinase( EC:2.7.6.1 )                                            | 968.2  | 1125.7 | 1036.3 | 915.6  | 949.7  | 1020.5 |  | 0.92 | 4.2E-01 |
| B035DRAFT_01283 | Thiamine monophosphate synthase                                                             | 98.2   | 104.8  | 83.4   | 139.6  | 134.3  | 128.6  |  | 1.41 | 6.9E-02 |
| B035DRAFT_01284 | Dinucleotide-utilizing enzymes involved in molybdopterin and thiamine biosynthesis family 2 | 17.6   | 13.9   | 17.8   | 18.7   | 18.6   | 18.8   |  | 1.15 | 3.6E-01 |
| B035DRAFT_01285 | thiazole biosynthesis protein ThiH                                                          | 17.8   | 18.9   | 21.4   | 20.6   | 21.4   | 20.5   |  | 1.08 | 4.7E-01 |
| B035DRAFT_01286 | hypothetical protein                                                                        | 16.8   | 10.2   | 16.1   | 16.0   | 16.1   | 19.4   |  | 1.22 | 5.2E-01 |
| B035DRAFT_01287 | thiamine biosynthesis protein ThiC                                                          | 37.9   | 35.0   | 39.3   | 47.3   | 51.6   | 43.2   |  | 1.26 | 1.1E-01 |
| B035DRAFT_01288 | Uncharacterized enzyme of thiazole biosynthesis                                             | 35.1   | 31.7   | 32.4   | 38.8   | 46.5   | 40.5   |  | 1.26 | 1.1E-01 |
| B035DRAFT_01289 | thiamine-phosphate pyrophosphorylase( EC:2.5.1.3 )                                          | 37.8   | 37.8   | 39.6   | 51.5   | 59.4   | 43.5   |  | 1.33 | 1.5E-01 |
| B035DRAFT_01290 | thiamine biosynthesis protein ThiS                                                          | 71.4   | 94.8   | 66.5   | 108.8  | 95.2   | 50.4   |  | 1.05 | 9.3E-01 |
| B035DRAFT_01292 | Signal transduction histidine kinase                                                        | 11.0   | 14.3   | 10.9   | 16.5   | 13.2   | 14.3   |  | 1.22 | 3.4E-01 |
| B035DRAFT_01293 | hypothetical protein                                                                        | 27.7   | 31.4   | 24.2   | 43.5   | 43.4   | 59.2   |  | 1.75 | 8.2E-02 |
| B035DRAFT_01294 | Uncharacterized protein related to glutamine synthetase( EC:6.3.1.2 )                       | 6.0    | 4.9    | 5.4    | 7.7    | 7.2    | 3.1    |  | 1.02 | 9.8E-01 |
| B035DRAFT_01295 | LL-diaminopimelate aminotransferase( EC:2.6.1.83 )                                          | 6.6    | 6.1    | 8.0    | 6.5    | 6.7    | 3.2    |  | 0.76 | 5.5E-01 |
| B035DRAFT_01296 | diaminopimelate epimerase( EC:5.1.1.7 )                                                     | 4.4    | 6.3    | 4.9    | 4.6    | 4.4    | 2.2    |  | 0.69 | 4.4E-01 |
| B035DRAFT_01297 | Glutamate synthase domain 2( EC:1.4.1.14,EC:1.4.1.13 )                                      | 5.1    | 4.4    | 6.1    | 6.2    | 4.7    | 2.8    |  | 0.84 | 7.1E-01 |
| B035DRAFT_01298 | glutamate synthases, NADH/NADPH, small subunit( EC:1.4.1.14,EC:1.4.1.13 )                   | 4.8    | 3.1    | 4.3    | 4.7    | 4.9    | 1.3    |  | 0.78 | 7.7E-01 |
| B035DRAFT_01299 | asparagine synthase (glutamine-hydrolyzing)( EC:6.3.5.4 )                                   | 15.6   | 8.7    | 13.1   | 8.3    | 6.3    | 4.8    |  | 0.52 | 1.9E-01 |
| B035DRAFT_01300 | Superoxide dismutase( EC:1.15.1.1 )                                                         | 2760.0 | 2605.4 | 2524.6 | 3820.5 | 2570.8 | 2931.7 |  | 1.17 | 4.8E-01 |
| B035DRAFT_01301 | Superfamily I DNA and RNA helicases( EC:3.6.4.12 )                                          | 85.9   | 79.4   | 77.0   | 72.9   | 92.8   | 73.9   |  | 0.98 | 9.3E-01 |
| B035DRAFT_01302 | carboxynorspermidine decarboxylase( EC:4.1.1.1 )                                            | 83.3   | 81.6   | 72.1   | 79.1   | 90.2   | 100.4  |  | 1.14 | 4.0E-01 |
| B035DRAFT_01303 | ( tRNA )                                                                                    | 0.0    | 0.0    | 0.0    | 0.0    | 0.0    | 0.0    |  | 0.00 |         |
| B035DRAFT_01304 | ( tRNA )                                                                                    | 1034.4 | 1004.8 | 1479.5 | 899.0  | 473.6  | 146.9  |  | 0.34 | 3.1E-01 |
| B035DRAFT_01305 | ( tRNA )                                                                                    | 745.6  | 681.6  | 1129.4 | 635.7  | 325.6  | 120.0  |  | 0.35 | 2.9E-01 |
| B035DRAFT_01306 | ( tRNA )                                                                                    | 0.0    | 0.0    | 0.0    | 0.0    | 0.0    | 0.0    |  | 0.00 |         |
| B035DRAFT_01307 | ( tRNA )                                                                                    | 1034.4 | 1004.8 | 1479.5 | 899.0  | 473.6  | 146.9  |  | 0.34 | 3.1E-01 |
| B035DRAFT_01308 | ( tRNA )                                                                                    | 1978.2 | 2193.6 | 2742.5 | 1906.9 | 1011.4 | 331.3  |  | 0.38 | 3.2E-01 |
| B035DRAFT_01309 | 5"-nucleotidase/2",3"-cyclic phosphodiesterase and related esterases                        | 148.5  | 145.3  | 129.9  | 137.9  | 169.9  | 120.4  |  | 1.00 | 9.9E-01 |
| B035DRAFT_01310 | Glutamine synthetase( EC:6.3.1.2 )                                                          | 110.9  | 134.3  | 127.9  | 151.4  | 152.4  | 201.7  |  | 1.35 | 1.9E-01 |
| B035DRAFT_01311 | hypothetical protein                                                                        | 28.6   | 32.8   | 29.7   | 41.9   | 44.3   | 57.6   |  | 1.57 | 8.6E-02 |
| B035DRAFT_01312 | Predicted amidohydrolase                                                                    | 86.4   | 95.0   | 77.9   | 83.2   | 90.9   | 91.2   |  | 1.03 | 8.5E-01 |

|                 |                                                                                              |        |       |        |        |       |       |  |      |         |
|-----------------|----------------------------------------------------------------------------------------------|--------|-------|--------|--------|-------|-------|--|------|---------|
| B035DRAFT_01313 | PAS fold./Histidine kinase-, DNA gyrase B-, and HSP90-like ATPase.                           | 32.1   | 41.0  | 39.8   | 41.0   | 42.6  | 53.0  |  | 1.21 | 3.6E-01 |
| B035DRAFT_01314 | Response regulator containing CheY-like receiver, AAA-type ATPase, and DNA-binding domains   | 16.7   | 15.2  | 13.7   | 23.0   | 24.8  | 25.5  |  | 1.61 | 2.7E-02 |
| B035DRAFT_01315 | Outer membrane protein                                                                       | 6.0    | 5.2   | 5.5    | 6.1    | 8.3   | 5.7   |  | 1.18 | 4.5E-01 |
| B035DRAFT_01316 | RND family efflux transporter, MFP subunit                                                   | 6.8    | 4.2   | 6.4    | 8.4    | 6.9   | 4.9   |  | 1.15 | 7.2E-01 |
| B035DRAFT_01317 | ABC-type antimicrobial peptide transport system, permease component                          | 8.2    | 8.7   | 7.3    | 7.7    | 9.4   | 7.1   |  | 0.99 | 9.8E-01 |
| B035DRAFT_01318 | ABC-type antimicrobial peptide transport system, ATPase component                            | 22.1   | 14.2  | 11.5   | 12.6   | 14.7  | 14.3  |  | 0.90 | 7.9E-01 |
| B035DRAFT_01319 | ABC-type antimicrobial peptide transport system, permease component                          | 17.8   | 15.9  | 17.1   | 11.4   | 12.3  | 12.2  |  | 0.71 | 2.1E-02 |
| B035DRAFT_01320 | Formyltetrahydrofolate synthetase( EC:6.3.4.3 )                                              | 557.9  | 512.2 | 491.0  | 430.6  | 441.4 | 433.6 |  | 0.84 | 7.3E-02 |
| B035DRAFT_01321 | AraC-type DNA-binding domain-containing proteins                                             | 42.5   | 53.9  | 42.3   | 33.3   | 43.8  | 51.5  |  | 0.92 | 7.6E-01 |
| B035DRAFT_01322 | hypothetical protein                                                                         | 7.9    | 6.9   | 6.0    | 6.2    | 9.0   | 7.2   |  | 1.07 | 7.8E-01 |
| B035DRAFT_01323 | RND family efflux transporter, MFP subunit                                                   | 10.3   | 5.5   | 5.8    | 8.6    | 8.6   | 9.7   |  | 1.31 | 4.7E-01 |
| B035DRAFT_01324 | The (Largely Gram-negative Bacterial) Hydrophobe/Amphiphile Efflux-1 (HAE1) Family           | 5.1    | 4.2   | 4.8    | 6.5    | 7.5   | 5.7   |  | 1.38 | 1.3E-01 |
| B035DRAFT_01325 | efflux transporter, outer membrane factor (OMF) lipoprotein, NodT family                     | 89.7   | 73.7  | 90.6   | 74.7   | 65.4  | 55.7  |  | 0.77 | 2.3E-01 |
| B035DRAFT_01326 | hypothetical protein                                                                         | 375.4  | 403.6 | 387.5  | 355.7  | 316.0 | 322.9 |  | 0.85 | 1.1E-01 |
| B035DRAFT_01327 | hypothetical protein                                                                         | 110.9  | 120.6 | 115.9  | 99.6   | 153.6 | 160.3 |  | 1.16 | 5.8E-01 |
| B035DRAFT_01328 | glycine dehydrogenase (decarboxylating)( EC:1.4.4.2 )                                        | 287.3  | 266.3 | 268.4  | 290.8  | 335.0 | 325.1 |  | 1.16 | 1.7E-01 |
| B035DRAFT_01329 | Zn-dependent hydrolases, including glyoxyalases                                              | 78.0   | 92.2  | 84.6   | 106.9  | 117.9 | 121.8 |  | 1.36 | 6.4E-02 |
| B035DRAFT_01330 | 16S rRNA (guanine(527)-N(7))-methyltransferase GidB( EC:2.1.1.170 )                          | 81.6   | 96.5  | 78.7   | 136.4  | 132.6 | 143.5 |  | 1.61 | 3.0E-02 |
| B035DRAFT_01331 | Protein of unknown function (DUF3298).                                                       | 35.1   | 41.0  | 42.7   | 83.1   | 97.5  | 118.2 |  | 2.50 | 2.5E-02 |
| B035DRAFT_01332 | copper-(or silver)-translocating P-type ATPase( EC:3.6.3.4 )                                 | 284.9  | 217.5 | 254.1  | 198.3  | 175.5 | 145.0 |  | 0.68 | 1.5E-01 |
| B035DRAFT_01333 | hypothetical protein                                                                         | 123.5  | 142.9 | 147.7  | 188.0  | 176.2 | 206.3 |  | 1.38 | 7.7E-02 |
| B035DRAFT_01334 | HD domain.                                                                                   | 40.0   | 34.1  | 38.2   | 30.9   | 29.4  | 38.9  |  | 0.88 | 4.7E-01 |
| B035DRAFT_01335 | lipoate-protein ligase B( EC:2.3.1.181 )                                                     | 38.6   | 38.6  | 39.0   | 44.8   | 43.9  | 41.2  |  | 1.12 | 8.2E-02 |
| B035DRAFT_01336 | Na+/H+ antiporter                                                                            | 128.7  | 146.0 | 135.6  | 157.1  | 137.4 | 155.6 |  | 1.10 | 3.8E-01 |
| B035DRAFT_01337 | ABC-type sugar transport system, periplasmic component                                       | 66.9   | 67.8  | 66.2   | 84.5   | 73.0  | 91.0  |  | 1.23 | 1.5E-01 |
| B035DRAFT_01338 | Sugar kinases, ribokinase family( EC:2.7.1.45 )                                              | 98.7   | 65.3  | 47.4   | 46.8   | 49.5  | 42.6  |  | 0.69 | 3.5E-01 |
| B035DRAFT_01339 | 2-keto-3-deoxy-6-phosphogluconate aldolase( EC:4.1.2.14,EC:4.1.3.16 )                        | 122.4  | 86.4  | 75.8   | 55.6   | 63.3  | 45.3  |  | 0.58 | 1.5E-01 |
| B035DRAFT_01340 | Zn-dependent protease with chaperone function( EC:3.4.24.)                                   | 82.6   | 71.1  | 77.7   | 57.1   | 74.8  | 59.8  |  | 0.82 | 2.9E-01 |
| B035DRAFT_01341 | Dipeptidyl aminopeptidases/acylaminoacyl-peptidases (PL22)                                   | 199.8  | 186.7 | 191.4  | 210.4  | 235.2 | 189.6 |  | 1.10 | 4.4E-01 |
| B035DRAFT_01342 | hypothetical protein                                                                         | 35.0   | 34.1  | 30.5   | 41.9   | 44.3  | 27.4  |  | 1.12 | 7.0E-01 |
| B035DRAFT_01343 | hypothetical protein                                                                         | 1.5    | 5.2   | 3.6    | 3.1    | 5.4   | 4.0   |  | 1.35 | 6.8E-01 |
| B035DRAFT_01344 | membrane protein insertase, YidC/Oxa1 family, N-terminal domain                              | 573.8  | 564.4 | 525.5  | 638.5  | 719.6 | 660.5 |  | 1.21 | 8.2E-02 |
| B035DRAFT_01345 | CTP synthase( EC:6.3.4.2 )                                                                   | 366.4  | 356.8 | 312.8  | 354.7  | 379.9 | 352.2 |  | 1.05 | 6.2E-01 |
| B035DRAFT_01346 | Protein of unknown function (DUF3078).                                                       | 231.9  | 265.9 | 226.1  | 239.7  | 201.5 | 228.8 |  | 0.93 | 5.5E-01 |
| B035DRAFT_01347 | UDP-N-acetylglucosamine 2-epimerase( EC:5.1.3.14 )                                           | 88.0   | 103.9 | 94.9   | 145.5  | 141.2 | 134.6 |  | 1.47 | 2.8E-02 |
| B035DRAFT_01348 | Predicted membrane protein                                                                   | 236.3  | 268.3 | 254.2  | 247.3  | 246.4 | 155.3 |  | 0.84 | 5.3E-01 |
| B035DRAFT_01349 | RNA polymerase sigma factor, sigma-70 family                                                 | 560.7  | 558.3 | 531.4  | 790.0  | 634.4 | 778.0 |  | 1.33 | 1.0E-01 |
| B035DRAFT_01350 | Pyruvate/oxaloacetate carboxyltransferase( EC:6.4.1.1 )                                      | 136.2  | 103.0 | 118.4  | 91.4   | 82.0  | 61.5  |  | 0.65 | 1.6E-01 |
| B035DRAFT_01351 | Protein of unknown function (DUF1460).                                                       | 132.9  | 119.8 | 126.6  | 140.6  | 138.8 | 109.9 |  | 1.02 | 9.1E-01 |
| B035DRAFT_01352 | monofunctional biosynthetic peptidoglycan transglycosylase( EC:2.4.1.) (GT51)                | 134.0  | 127.6 | 135.3  | 104.3  | 91.5  | 101.7 |  | 0.75 | 3.6E-02 |
| B035DRAFT_01353 | Outer membrane protein and related peptidoglycan-associated (lipo)proteins                   | 1109.5 | 917.7 | 1052.6 | 1088.4 | 903.7 | 760.6 |  | 0.89 | 5.8E-01 |
| B035DRAFT_01354 | putative efflux protein, MATE family                                                         | 46.4   | 53.0  | 53.7   | 53.9   | 48.7  | 43.6  |  | 0.95 | 7.4E-01 |
| B035DRAFT_01355 | Glycine/serine hydroxymethyltransferase( EC:2.1.2.1 )                                        | 285.2  | 330.5 | 293.3  | 333.6  | 369.0 | 346.7 |  | 1.16 | 2.0E-01 |
| B035DRAFT_01356 | hypothetical protein                                                                         | 38.3   | 52.8  | 48.0   | 48.1   | 46.4  | 57.4  |  | 1.10 | 6.6E-01 |
| B035DRAFT_01357 | Conserved protein/domain typically associated with flavoprotein oxygenases, DIM6/NTAB family | 126.0  | 147.9 | 136.7  | 147.8  | 148.5 | 161.6 |  | 1.12 | 2.9E-01 |
| B035DRAFT_01358 | aspartate carbamoyltransferase, regulatory subunit                                           | 110.1  | 149.5 | 120.2  | 147.2  | 170.6 | 143.9 |  | 1.22 | 3.2E-01 |

|                 |                                                                                                                       |        |        |        |        |        |        |  |      |         |
|-----------------|-----------------------------------------------------------------------------------------------------------------------|--------|--------|--------|--------|--------|--------|--|------|---------|
| B035DRAFT_01359 | aspartate carbamoyltransferase( EC:2.1.3.2 )                                                                          | 121.0  | 114.2  | 95.8   | 134.8  | 148.9  | 156.8  |  | 1.33 | 1.3E-01 |
| B035DRAFT_01360 | Membrane carboxypeptidase/penicillin-binding protein( EC:3.4.-,EC:2.4.1.) (GT51)                                      | 111.1  | 110.7  | 101.9  | 115.1  | 140.7  | 96.0   |  | 1.07 | 7.3E-01 |
| B035DRAFT_01361 | hypothetical protein                                                                                                  | 37.5   | 36.3   | 36.0   | 40.6   | 55.1   | 60.6   |  | 1.40 | 1.8E-01 |
| B035DRAFT_01362 | fructose-6-phosphate aldolase, TalC/MipB family( EC:2.2.1.2 )                                                         | 68.6   | 65.2   | 68.8   | 89.9   | 99.5   | 82.7   |  | 1.34 | 6.0E-02 |
| B035DRAFT_01363 | 7,8-dihydro-6-hydroxymethylpterin-pyrophosphokinase( EC:2.7.6.3 )                                                     | 24.1   | 22.7   | 26.0   | 22.9   | 23.9   | 31.0   |  | 1.06 | 7.6E-01 |
| B035DRAFT_01364 | 3-deoxy-D-manno-octulosonate cytidyltransferase( EC:2.7.7.38 )                                                        | 208.9  | 220.7  | 208.8  | 217.6  | 236.2  | 214.9  |  | 1.05 | 4.7E-01 |
| B035DRAFT_01365 | Predicted Zn-dependent peptidases                                                                                     | 123.2  | 129.2  | 111.1  | 119.9  | 144.6  | 150.8  |  | 1.14 | 4.0E-01 |
| B035DRAFT_01366 | Uncharacterized protein conserved in bacteria                                                                         | 152.9  | 138.3  | 106.4  | 102.8  | 186.0  | 90.3   |  | 0.92 | 8.6E-01 |
| B035DRAFT_01367 | Archaeal fructose-1,6-bisphosphatase and related enzymes of inositol monophosphatase family( EC:3.1.3.25 )            | 101.1  | 121.7  | 108.6  | 128.4  | 145.4  | 122.1  |  | 1.19 | 2.3E-01 |
| B035DRAFT_01368 | TIGR02453 family protein                                                                                              | 235.9  | 271.5  | 234.3  | 270.2  | 301.9  | 316.5  |  | 1.20 | 1.9E-01 |
| B035DRAFT_01369 | uncharacterized protein, YhcH/YjgK/YiaL family                                                                        | 204.2  | 228.4  | 220.9  | 226.6  | 232.3  | 282.7  |  | 1.13 | 3.9E-01 |
| B035DRAFT_01370 | 1,4-alpha-glucan branching enzyme( EC:2.4.1.18 ) (CBM48)                                                              | 303.8  | 332.5  | 339.3  | 317.3  | 339.1  | 362.6  |  | 1.04 | 6.4E-01 |
| B035DRAFT_01371 | hypothetical protein                                                                                                  | 177.4  | 188.0  | 179.3  | 169.2  | 193.5  | 211.4  |  | 1.05 | 6.9E-01 |
| B035DRAFT_01372 | prolyl-tRNA synthetase, family I( EC:6.1.1.15 )                                                                       | 383.8  | 378.6  | 355.1  | 340.7  | 373.9  | 363.6  |  | 0.96 | 5.9E-01 |
| B035DRAFT_01373 | ABC-type antimicrobial peptide transport system, ATPase component( EC:3.6.3.21 )                                      | 100.4  | 100.9  | 96.0   | 91.3   | 107.8  | 71.0   |  | 0.90 | 6.2E-01 |
| B035DRAFT_01374 | ABC-type uncharacterized transport system, permease component                                                         | 93.1   | 100.6  | 87.3   | 79.6   | 97.9   | 111.8  |  | 1.02 | 9.3E-01 |
| B035DRAFT_01375 | hypothetical protein                                                                                                  | 64.9   | 67.6   | 55.9   | 49.6   | 66.0   | 65.1   |  | 0.95 | 8.3E-01 |
| B035DRAFT_01376 | dinuclear metal center protein, Ybgl/SA1388 family                                                                    | 203.9  | 229.8  | 190.6  | 151.9  | 206.4  | 144.3  |  | 0.80 | 3.3E-01 |
| B035DRAFT_01377 | Zn-ribbon protein, possibly nucleic acid-binding                                                                      | 855.9  | 974.9  | 856.2  | 884.0  | 903.1  | 898.6  |  | 1.00 | 9.9E-01 |
| B035DRAFT_01378 | hypothetical protein                                                                                                  | 68.3   | 72.9   | 79.5   | 73.1   | 78.6   | 82.6   |  | 1.06 | 5.5E-01 |
| B035DRAFT_01379 | AMP nucleosidase, putative( EC:3.2.2.4 )                                                                              | 137.4  | 140.8  | 109.3  | 146.0  | 188.2  | 180.4  |  | 1.33 | 2.1E-01 |
| B035DRAFT_01380 | DNA polymerase III, delta subunit( EC:2.7.7.7 )                                                                       | 143.3  | 151.8  | 119.0  | 149.5  | 196.2  | 221.6  |  | 1.36 | 2.6E-01 |
| B035DRAFT_01381 | Predicted transcriptional regulators                                                                                  | 62.8   | 72.1   | 57.6   | 121.6  | 93.9   | 102.7  |  | 1.65 | 6.3E-02 |
| B035DRAFT_01382 | 2-polypropenylphenol hydroxylase and related flavodoxin oxidoreductases                                               | 149.2  | 161.9  | 162.1  | 148.6  | 175.9  | 162.8  |  | 1.03 | 7.9E-01 |
| B035DRAFT_01383 | dihydroorotate dehydrogenase (subfamily 1) family protein( EC:1.3.98.1 )                                              | 198.6  | 202.4  | 193.6  | 211.0  | 242.5  | 231.5  |  | 1.15 | 1.4E-01 |
| B035DRAFT_01384 | hypothetical protein                                                                                                  | 26.1   | 27.1   | 25.1   | 37.6   | 38.6   | 52.4   |  | 1.62 | 7.9E-02 |
| B035DRAFT_01385 | tRNA (guanine-N1)-methyltransferase( EC:2.1.1.31 )                                                                    | 122.4  | 135.3  | 115.7  | 108.3  | 103.9  | 121.7  |  | 0.89 | 3.6E-01 |
| B035DRAFT_01386 | DNA ligase, NAD-dependent( EC:6.5.1.2 )                                                                               | 158.2  | 151.1  | 143.8  | 191.0  | 203.2  | 210.6  |  | 1.33 | 2.8E-02 |
| B035DRAFT_01387 | dihydrodipicolinate synthase( EC:4.2.1.52 )                                                                           | 633.9  | 755.4  | 708.6  | 730.5  | 710.5  | 872.3  |  | 1.10 | 5.2E-01 |
| B035DRAFT_01388 | hypothetical protein                                                                                                  | 0.0    | 0.0    | 0.0    | 0.0    | 0.0    | 0.0    |  | 0.00 |         |
| B035DRAFT_01389 | hypothetical protein                                                                                                  | 0.0    | 0.0    | 0.0    | 0.0    | 0.0    | 0.0    |  | 0.00 |         |
| B035DRAFT_01390 | hypothetical protein                                                                                                  | 231.1  | 261.0  | 239.1  | 246.9  | 242.4  | 286.3  |  | 1.06 | 6.2E-01 |
| B035DRAFT_01391 | rRNA methylase, putative, group 3( EC:2.1.1.)                                                                         | 157.3  | 154.6  | 149.3  | 146.4  | 162.1  | 171.9  |  | 1.04 | 6.7E-01 |
| B035DRAFT_01392 | DNA repair protein RecN                                                                                               | 143.4  | 145.5  | 132.5  | 139.4  | 148.1  | 156.8  |  | 1.05 | 5.1E-01 |
| B035DRAFT_01393 | phosphopantothenoylcysteine decarboxylase/phosphopantothenate--cysteine ligase, prokaryotic( EC:6.3.2.5,EC:4.1.1.36 ) | 207.3  | 206.6  | 184.3  | 197.4  | 215.6  | 159.3  |  | 0.95 | 7.8E-01 |
| B035DRAFT_01394 | DNA polymerase III, epsilon subunit and related 3"-5" exonucleases( EC:2.7.7.7 )                                      | 352.8  | 368.6  | 329.7  | 347.0  | 391.8  | 396.6  |  | 1.08 | 4.3E-01 |
| B035DRAFT_01395 | DNA polymerase III, beta subunit( EC:2.7.7.7 )                                                                        | 296.6  | 314.2  | 265.1  | 322.1  | 350.8  | 386.6  |  | 1.21 | 2.0E-01 |
| B035DRAFT_01396 | Protein of unknown function (DUF3127).                                                                                | 1210.2 | 1390.1 | 1400.3 | 1803.2 | 1383.4 | 992.2  |  | 1.02 | 9.7E-01 |
| B035DRAFT_01397 | transcription termination factor Rho                                                                                  | 1047.4 | 1054.0 | 959.6  | 1111.0 | 1136.1 | 1266.9 |  | 1.15 | 1.9E-01 |
| B035DRAFT_01398 | hypothetical protein                                                                                                  | 46.0   | 49.9   | 41.5   | 51.8   | 49.8   | 41.6   |  | 1.04 | 8.1E-01 |
| B035DRAFT_01399 | endoribonuclease L-PSP, putative                                                                                      | 419.9  | 498.7  | 491.0  | 602.1  | 588.0  | 682.2  |  | 1.33 | 9.6E-02 |
| B035DRAFT_01400 | hypothetical protein                                                                                                  | 273.0  | 309.4  | 298.1  | 337.7  | 346.1  | 436.1  |  | 1.27 | 2.0E-01 |
| B035DRAFT_01401 | Predicted Zn-dependent hydrolases of the beta-lactamase fold                                                          | 228.0  | 218.4  | 223.1  | 216.9  | 192.6  | 185.5  |  | 0.89 | 2.2E-01 |
| B035DRAFT_01402 | Lactoylglutathione lyase and related lyases( EC:4.4.1.5 )                                                             | 255.6  | 248.3  | 203.9  | 220.6  | 217.5  | 227.8  |  | 0.95 | 6.7E-01 |
| B035DRAFT_01403 | hypothetical protein                                                                                                  | 305.9  | 287.3  | 256.3  | 239.5  | 265.7  | 227.4  |  | 0.86 | 2.7E-01 |
| B035DRAFT_01404 | ATPase components of ABC transporters with duplicated ATPase domains                                                  | 234.4  | 218.6  | 223.3  | 190.1  | 217.7  | 182.4  |  | 0.87 | 2.3E-01 |

|                 |                                                                                                                                                                                    |       |       |       |       |       |       |      |         |
|-----------------|------------------------------------------------------------------------------------------------------------------------------------------------------------------------------------|-------|-------|-------|-------|-------|-------|------|---------|
| B035DRAFT_01405 | His Kinase A (phosphoacceptor) domain./Response regulator receiver domain./Y_Y domain./Histidine kinase-, DNA gyrase B-, and HSP90-like ATPase./Two component regulator propeller. | 24.5  | 26.9  | 27.3  | 21.9  | 24.5  | 26.2  | 0.92 | 4.7E-01 |
| B035DRAFT_01406 | hypothetical protein                                                                                                                                                               | 4.0   | 2.3   | 1.2   | 0.0   | 2.7   | 1.8   | 0.99 | 9.9E-01 |
| B035DRAFT_01407 | hypothetical protein                                                                                                                                                               | 14.5  | 11.8  | 18.2  | 19.0  | 18.7  | 19.2  | 1.30 | 2.8E-01 |
| B035DRAFT_01408 | Site-specific recombinase XerD                                                                                                                                                     | 36.8  | 27.1  | 28.8  | 38.3  | 41.9  | 22.1  | 1.07 | 8.7E-01 |
| B035DRAFT_01409 | Uncharacterized conserved protein                                                                                                                                                  | 41.3  | 39.4  | 43.3  | 49.4  | 51.4  | 43.8  | 1.16 | 1.9E-01 |
| B035DRAFT_01410 | hypothetical protein (CE13)                                                                                                                                                        | 55.6  | 53.5  | 42.1  | 69.7  | 79.0  | 72.5  | 1.47 | 9.1E-02 |
| B035DRAFT_01411 | hypothetical protein                                                                                                                                                               | 11.4  | 7.4   | 11.5  | 9.3   | 12.6  | 5.2   | 0.86 | 7.9E-01 |
| B035DRAFT_01412 | hypothetical protein                                                                                                                                                               | 16.3  | 12.6  | 13.9  | 17.5  | 19.3  | 9.6   | 1.04 | 9.3E-01 |
| B035DRAFT_01413 | DNA primase (bacterial type)                                                                                                                                                       | 11.1  | 8.6   | 11.3  | 11.1  | 15.3  | 9.4   | 1.14 | 6.7E-01 |
| B035DRAFT_01414 | hypothetical protein                                                                                                                                                               | 12.9  | 8.5   | 11.6  | 9.8   | 10.4  | 10.3  | 0.94 | 7.8E-01 |
| B035DRAFT_01415 | Transposase DDE domain.                                                                                                                                                            | 208.0 | 227.9 | 251.6 | 140.2 | 128.0 | 154.4 | 0.61 | 4.0E-02 |
| B035DRAFT_01416 | hypothetical protein                                                                                                                                                               | 71.9  | 85.2  | 86.1  | 79.9  | 70.9  | 82.9  | 0.96 | 7.8E-01 |
| B035DRAFT_01417 | hypothetical protein                                                                                                                                                               | 81.1  | 87.3  | 78.1  | 60.1  | 64.1  | 73.7  | 0.80 | 1.5E-01 |
| B035DRAFT_01418 | ( tRNA )                                                                                                                                                                           | 254.5 | 357.0 | 341.3 | 233.3 | 121.3 | 81.7  | 0.42 | 2.0E-01 |
| B035DRAFT_01419 | Putative transcriptional regulator                                                                                                                                                 | 142.9 | 122.5 | 132.1 | 169.9 | 231.7 | 251.7 | 1.62 | 1.1E-01 |
| B035DRAFT_01420 | Acetyltransferases, including N-acetylases of ribosomal proteins( EC:2.3.1.57 )                                                                                                    | 128.1 | 137.6 | 128.4 | 135.1 | 138.3 | 166.4 | 1.11 | 4.1E-01 |
| B035DRAFT_01421 | hypothetical protein                                                                                                                                                               | 100.3 | 107.3 | 99.0  | 105.5 | 112.0 | 134.4 | 1.14 | 3.5E-01 |
| B035DRAFT_01422 | recombination protein RecR                                                                                                                                                         | 67.5  | 62.0  | 58.5  | 61.3  | 66.9  | 65.1  | 1.03 | 7.5E-01 |
| B035DRAFT_01423 | Na+/proline symporter                                                                                                                                                              | 98.5  | 107.6 | 99.7  | 99.0  | 103.7 | 114.0 | 1.03 | 7.1E-01 |
| B035DRAFT_01424 | ribosome biogenesis GTP-binding protein YsxC/EngB                                                                                                                                  | 76.2  | 72.0  | 61.4  | 45.1  | 72.9  | 60.8  | 0.84 | 5.3E-01 |
| B035DRAFT_01425 | Leucyl aminopeptidase (aminopeptidase T)                                                                                                                                           | 121.2 | 126.6 | 130.9 | 137.7 | 146.9 | 149.1 | 1.15 | 9.0E-02 |
| B035DRAFT_01426 | Response regulators consisting of a CheY-like receiver domain and a winged-helix DNA-binding domain                                                                                | 39.1  | 39.1  | 32.7  | 30.9  | 41.3  | 46.4  | 1.06 | 8.3E-01 |
| B035DRAFT_01427 | Signal transduction histidine kinase                                                                                                                                               | 35.6  | 32.6  | 27.6  | 27.1  | 37.8  | 40.0  | 1.09 | 7.6E-01 |
| B035DRAFT_01428 | Protein of unknown function (DUF2874).                                                                                                                                             | 46.3  | 41.7  | 42.7  | 45.9  | 60.5  | 56.8  | 1.24 | 2.3E-01 |
| B035DRAFT_01429 | UDP-glucuronosyl and UDP-glucosyl transferase.                                                                                                                                     | 55.1  | 55.7  | 50.8  | 52.5  | 47.8  | 49.3  | 0.93 | 3.1E-01 |
| B035DRAFT_01430 | Predicted aminopeptidases                                                                                                                                                          | 70.8  | 70.3  | 73.4  | 80.3  | 84.8  | 71.1  | 1.10 | 3.5E-01 |
| B035DRAFT_01431 | ATP synthase, F1 beta subunit( EC:3.6.3.14 )                                                                                                                                       | 942.7 | 810.1 | 891.4 | 955.7 | 601.2 | 350.2 | 0.67 | 4.5E-01 |
| B035DRAFT_01432 | F0F1-type ATP synthase, epsilon subunit (mitochondrial delta subunit)( EC:3.6.3.14 )                                                                                               | 626.8 | 593.0 | 614.2 | 604.9 | 405.3 | 377.3 | 0.74 | 2.9E-01 |
| B035DRAFT_01433 | hypothetical protein                                                                                                                                                               | 386.2 | 478.9 | 497.5 | 428.3 | 277.9 | 337.0 | 0.76 | 3.2E-01 |
| B035DRAFT_01434 | F0F1-type ATP synthase, subunit a( EC:3.6.3.14 )                                                                                                                                   | 606.8 | 587.8 | 711.8 | 675.7 | 476.4 | 453.1 | 0.83 | 4.6E-01 |
| B035DRAFT_01435 | ATP synthase, F0 subunit c( EC:3.6.3.14 )                                                                                                                                          | 298.3 | 277.4 | 325.5 | 287.2 | 198.1 | 156.6 | 0.69 | 2.9E-01 |
| B035DRAFT_01436 | ATP synthase, F0 subunit b( EC:3.6.3.14 )                                                                                                                                          | 494.3 | 429.6 | 536.2 | 557.3 | 372.9 | 207.5 | 0.72 | 5.4E-01 |
| B035DRAFT_01437 | ATP synthase, F1 delta subunit( EC:3.6.3.14 )                                                                                                                                      | 254.8 | 265.0 | 318.5 | 284.2 | 207.8 | 123.4 | 0.70 | 4.3E-01 |
| B035DRAFT_01438 | proton translocating ATP synthase, F1 alpha subunit( EC:3.6.3.14 )                                                                                                                 | 410.9 | 387.3 | 467.6 | 521.6 | 343.7 | 191.2 | 0.77 | 6.3E-01 |
| B035DRAFT_01439 | ATP synthase, F1 gamma subunit( EC:3.6.3.14 )                                                                                                                                      | 405.3 | 417.5 | 502.9 | 582.7 | 416.3 | 333.0 | 0.98 | 9.6E-01 |
| B035DRAFT_01440 | hypothetical protein                                                                                                                                                               | 69.2  | 79.7  | 77.8  | 77.3  | 86.8  | 78.2  | 1.07 | 5.1E-01 |
| B035DRAFT_01441 | hypothetical protein                                                                                                                                                               | 47.3  | 45.3  | 56.0  | 67.7  | 66.1  | 42.7  | 1.17 | 6.0E-01 |
| B035DRAFT_01442 | MoxR-like ATPases( EC:3.6.3.)                                                                                                                                                      | 112.7 | 105.3 | 102.6 | 108.3 | 114.1 | 90.6  | 0.97 | 8.5E-01 |
| B035DRAFT_01443 | Uncharacterized protein containing a von Willebrand factor type A (vWA) domain                                                                                                     | 74.3  | 80.7  | 76.3  | 84.0  | 81.2  | 71.0  | 1.02 | 8.6E-01 |
| B035DRAFT_01444 | 2-aminoethylphosphonate--pyruvate transaminase( EC:2.6.1.37 )                                                                                                                      | 7.7   | 11.5  | 9.2   | 9.6   | 12.3  | 10.5  | 1.15 | 5.7E-01 |
| B035DRAFT_01445 | phosphonoacetaldehyde hydrolase( EC:3.11.1.1 )                                                                                                                                     | 5.5   | 6.2   | 6.4   | 7.2   | 5.6   | 5.0   | 0.97 | 9.1E-01 |
| B035DRAFT_01446 | hypothetical protein                                                                                                                                                               | 6.7   | 6.9   | 5.3   | 3.8   | 5.7   | 4.4   | 0.73 | 2.8E-01 |
| B035DRAFT_01447 | hypothetical protein                                                                                                                                                               | 7.3   | 7.6   | 6.3   | 5.9   | 7.0   | 7.3   | 0.95 | 7.5E-01 |
| B035DRAFT_01448 | Aldo/keto reductases, related to diketogulonate reductase                                                                                                                          | 17.3  | 17.4  | 19.9  | 18.5  | 18.9  | 18.9  | 1.03 | 7.1E-01 |
| B035DRAFT_01449 | Aldo/keto reductases, related to diketogulonate reductase                                                                                                                          | 19.7  | 11.7  | 13.5  | 13.7  | 14.4  | 10.1  | 0.86 | 6.6E-01 |

|                 |                                                                                                            |        |        |        |        |        |        |      |         |
|-----------------|------------------------------------------------------------------------------------------------------------|--------|--------|--------|--------|--------|--------|------|---------|
| B035DRAFT_01450 | AraC-type DNA-binding domain-containing proteins                                                           | 35.9   | 46.0   | 41.7   | 44.7   | 39.6   | 29.3   | 0.91 | 7.2E-01 |
| B035DRAFT_01451 | Lipoprotein signal peptidase( EC:3.4.23.36 )                                                               | 28.5   | 38.0   | 32.2   | 28.7   | 28.9   | 39.4   | 0.98 | 9.3E-01 |
| B035DRAFT_01452 | hypothetical protein                                                                                       | 30.7   | 40.0   | 34.1   | 31.6   | 26.8   | 33.9   | 0.88 | 5.0E-01 |
| B035DRAFT_01453 | Protein of unknown function (DUF3584).                                                                     | 51.9   | 53.3   | 50.0   | 47.8   | 55.3   | 55.5   | 1.02 | 8.5E-01 |
| B035DRAFT_01454 | hypothetical protein                                                                                       | 50.5   | 73.2   | 51.9   | 49.2   | 49.5   | 65.2   | 0.94 | 8.3E-01 |
| B035DRAFT_01455 | hypothetical protein                                                                                       | 58.8   | 79.7   | 65.0   | 69.4   | 80.3   | 82.2   | 1.15 | 4.7E-01 |
| B035DRAFT_01456 | ABC-type molybdenum transport system, ATPase component/photorepair protein PhrA                            | 47.5   | 49.1   | 43.5   | 44.8   | 53.6   | 51.2   | 1.07 | 5.8E-01 |
| B035DRAFT_01457 | Dioxygenases related to 2-nitropropane dioxygenase( EC:1.3.1.)                                             | 447.8  | 456.5  | 435.7  | 289.1  | 202.1  | 159.2  | 0.47 | 8.2E-02 |
| B035DRAFT_01458 | anaerobic c4-dicarboxylate membrane transporter family protein                                             | 274.5  | 264.8  | 279.8  | 181.4  | 147.9  | 133.8  | 0.56 | 3.9E-02 |
| B035DRAFT_01459 | L-asparaginases, type II( EC:3.5.1.1 )                                                                     | 494.8  | 458.4  | 536.5  | 443.3  | 382.3  | 297.0  | 0.75 | 2.4E-01 |
| B035DRAFT_01460 | hypothetical protein                                                                                       | 193.8  | 183.1  | 220.3  | 171.4  | 151.1  | 164.3  | 0.82 | 1.6E-01 |
| B035DRAFT_01461 | Na <sup>+</sup> /H <sup>+</sup> -dicarboxylate symporters                                                  | 228.0  | 192.5  | 234.2  | 201.4  | 171.8  | 153.5  | 0.80 | 2.6E-01 |
| B035DRAFT_01462 | 6-phosphogluconate dehydrogenase (decarboxylating)( EC:1.1.1.44 )                                          | 1081.0 | 804.7  | 1034.9 | 781.7  | 542.1  | 235.4  | 0.48 | 3.0E-01 |
| B035DRAFT_01463 | glucose-6-phosphate 1-dehydrogenase( EC:1.1.1.49 )                                                         | 701.4  | 583.9  | 730.9  | 589.2  | 392.5  | 308.8  | 0.62 | 2.3E-01 |
| B035DRAFT_01464 | 6-phosphogluconolactonase( EC:3.1.1.31 )                                                                   | 355.4  | 289.8  | 392.1  | 297.1  | 214.0  | 176.5  | 0.65 | 2.3E-01 |
| B035DRAFT_01465 | Putative translation initiation inhibitor, yjgF family                                                     | 154.3  | 146.3  | 146.7  | 83.8   | 83.7   | 83.6   | 0.56 | 2.1E-04 |
| B035DRAFT_01466 | ABC-type transport system involved in cytochrome c biogenesis, permease component                          | 65.8   | 63.9   | 57.7   | 11.3   | 16.8   | 14.7   | 0.23 | 7.4E-03 |
| B035DRAFT_01467 | Predicted thiol oxidoreductase                                                                             | 401.8  | 390.0  | 289.1  | 40.8   | 68.5   | 55.1   | 0.15 | 1.3E-02 |
| B035DRAFT_01468 | Imelysin.                                                                                                  | 483.9  | 418.5  | 337.0  | 55.5   | 99.1   | 95.1   | 0.20 | 2.6E-02 |
| B035DRAFT_01469 | hypothetical protein                                                                                       | 646.8  | 569.2  | 442.6  | 138.3  | 182.0  | 171.7  | 0.30 | 2.0E-02 |
| B035DRAFT_01470 | cAMP-binding proteins - catabolite gene activator and regulatory subunit of cAMP-dependent protein kinases | 30.1   | 37.7   | 32.6   | 50.3   | 47.6   | 50.9   | 1.49 | 4.8E-02 |
| B035DRAFT_01471 | heavy metal-(Cd/Co/Hg/Pb/Zn)-translocating P-type ATPase( EC:3.6.3.3,EC:3.6.3.5 )                          | 40.7   | 29.6   | 36.7   | 27.4   | 35.5   | 16.3   | 0.71 | 4.5E-01 |
| B035DRAFT_01472 | Predicted permease                                                                                         | 79.3   | 81.4   | 83.6   | 105.7  | 99.7   | 89.1   | 1.20 | 1.2E-01 |
| B035DRAFT_01473 | hypothetical protein                                                                                       | 4.3    | 6.7    | 3.5    | 3.0    | 3.9    | 1.3    | 0.54 | 3.8E-01 |
| B035DRAFT_01474 | cobyrinic acid a,c-diamide synthase( EC:6.3.5.9,EC:6.3.5.11 )                                              | 74.0   | 60.1   | 79.5   | 70.0   | 67.9   | 35.1   | 0.78 | 5.6E-01 |
| B035DRAFT_01475 | cobyrinic acid synthase CobQ( EC:6.3.5.10 )                                                                | 74.0   | 72.3   | 81.1   | 72.1   | 77.2   | 41.9   | 0.81 | 5.6E-01 |
| B035DRAFT_01476 | Histidinol-phosphate/aromatic aminotransferase and cobyrinic acid decarboxylase( EC:4.1.1.81 )             | 46.2   | 54.5   | 45.9   | 43.6   | 50.9   | 46.2   | 0.96 | 7.7E-01 |
| B035DRAFT_01477 | cobalamin biosynthesis protein CobD( EC:6.3.1.10 )                                                         | 43.7   | 46.0   | 50.1   | 35.8   | 41.7   | 35.8   | 0.81 | 1.4E-01 |
| B035DRAFT_01478 | alpha-ribazole phosphatase                                                                                 | 46.1   | 53.2   | 52.2   | 52.5   | 61.8   | 45.1   | 1.05 | 8.2E-01 |
| B035DRAFT_01479 | Cobalamin-5-phosphate synthase( EC:2.7.8.26 )                                                              | 66.7   | 78.0   | 80.9   | 86.3   | 83.1   | 77.8   | 1.10 | 4.4E-01 |
| B035DRAFT_01480 | nicotinate-nucleotide--dimethylbenzimidazole phosphoribosyltransferase( EC:2.4.2.21 )                      | 101.5  | 95.5   | 112.1  | 124.9  | 110.8  | 69.4   | 0.96 | 9.1E-01 |
| B035DRAFT_01481 | Adenosyl cobinamide kinase/adenosyl cobinamide phosphate guanylyltransferase( EC:2.7.1.156,EC:2.7.7.62 )   | 73.1   | 72.3   | 70.5   | 69.0   | 79.1   | 61.6   | 0.97 | 8.0E-01 |
| B035DRAFT_01482 | FHA domain.                                                                                                | 193.4  | 229.7  | 169.1  | 196.1  | 196.9  | 201.8  | 1.01 | 9.5E-01 |
| B035DRAFT_01483 | Sporulation related domain.                                                                                | 246.0  | 276.1  | 238.5  | 294.5  | 299.9  | 325.7  | 1.21 | 1.2E-01 |
| B035DRAFT_01484 | nucleotide sugar dehydrogenase( EC:1.1.1.22 )                                                              | 200.5  | 189.0  | 174.7  | 164.8  | 197.9  | 142.5  | 0.89 | 5.2E-01 |
| B035DRAFT_01485 | hypothetical protein                                                                                       | 126.5  | 127.2  | 108.1  | 91.5   | 140.1  | 120.6  | 0.96 | 8.8E-01 |
| B035DRAFT_01486 | Superfamily II DNA and RNA helicases                                                                       | 252.1  | 264.2  | 243.3  | 257.0  | 280.2  | 301.1  | 1.10 | 3.2E-01 |
| B035DRAFT_01487 | phosphoserine phosphatase SerB( EC:3.1.3.3 )                                                               | 245.9  | 288.7  | 271.7  | 337.0  | 314.2  | 330.2  | 1.22 | 1.0E-01 |
| B035DRAFT_01488 | Peroxiredoxin                                                                                              | 1105.7 | 1127.8 | 1181.8 | 1186.6 | 1049.0 | 1188.8 | 1.00 | 9.9E-01 |
| B035DRAFT_01489 | hypothetical protein                                                                                       | 84.5   | 124.0  | 115.4  | 70.2   | 86.0   | 103.7  | 0.80 | 4.6E-01 |
| B035DRAFT_01490 | hypothetical protein                                                                                       | 61.4   | 72.6   | 65.0   | 60.9   | 66.0   | 71.6   | 1.00 | 9.9E-01 |
| B035DRAFT_01491 | haloacid dehalogenase superfamily, subfamily IA, variant 3 with third motif having DD or ED                | 160.3  | 158.3  | 153.2  | 91.2   | 105.5  | 93.5   | 0.61 | 1.3E-02 |
| B035DRAFT_01492 | Predicted permeases                                                                                        | 160.1  | 175.0  | 164.6  | 161.6  | 171.7  | 181.3  | 1.03 | 7.1E-01 |



|                 |                                                                                            |        |        |        |        |        |        |      |         |
|-----------------|--------------------------------------------------------------------------------------------|--------|--------|--------|--------|--------|--------|------|---------|
| B035DRAFT_01493 | tRNA-guanine transglycosylase, queuosine-34-forming( EC:2.4.2.29 )                         | 270.5  | 246.2  | 264.3  | 277.0  | 287.3  | 245.8  | 1.04 | 7.3E-01 |
| B035DRAFT_01494 | ATP-dependent protease La( EC:3.4.21.53 )                                                  | 240.4  | 230.0  | 201.5  | 221.0  | 231.3  | 217.9  | 1.00 | 1.0E+00 |
| B035DRAFT_01495 | Predicted O-methyltransferase                                                              | 58.5   | 69.1   | 76.4   | 64.1   | 54.5   | 55.1   | 0.85 | 3.7E-01 |
| B035DRAFT_01496 | lipid kinase, YegS/Rv2252/BmrU family                                                      | 402.8  | 428.0  | 382.5  | 365.1  | 260.2  | 267.9  | 0.73 | 1.8E-01 |
| B035DRAFT_01497 | 7-keto-8-aminopelargonate synthetase and related enzymes( EC:2.3.1.47 )                    | 1554.4 | 1834.5 | 1765.9 | 1570.5 | 1560.4 | 1716.8 | 0.94 | 5.7E-01 |
| B035DRAFT_01498 | Predicted permeases                                                                        | 144.2  | 158.5  | 148.1  | 152.6  | 179.5  | 146.0  | 1.06 | 6.6E-01 |
| B035DRAFT_01499 | ABC-type antimicrobial peptide transport system, permease component                        | 39.3   | 43.2   | 44.0   | 54.0   | 58.8   | 51.6   | 1.30 | 6.3E-02 |
| B035DRAFT_01500 | ABC-type antimicrobial peptide transport system, ATPase component                          | 35.9   | 34.8   | 33.0   | 36.5   | 36.4   | 31.7   | 1.01 | 9.5E-01 |
| B035DRAFT_01501 | ABC-type antimicrobial peptide transport system, permease component                        | 12.1   | 13.2   | 11.9   | 13.0   | 15.0   | 16.5   | 1.19 | 2.5E-01 |
| B035DRAFT_01502 | ABC-type transport system, involved in lipoprotein release, permease component             | 8.9    | 8.9    | 9.4    | 9.9    | 10.2   | 9.2    | 1.08 | 3.1E-01 |
| B035DRAFT_01503 | ABC-type antimicrobial peptide transport system, permease component                        | 6.8    | 7.5    | 6.2    | 7.6    | 6.8    | 7.7    | 1.08 | 5.3E-01 |
| B035DRAFT_01504 | ABC-type antimicrobial peptide transport system, permease component                        | 5.6    | 6.7    | 6.4    | 5.3    | 8.1    | 6.7    | 1.06 | 8.2E-01 |
| B035DRAFT_01505 | Membrane-fusion protein                                                                    | 3.2    | 1.7    | 1.8    | 2.7    | 2.3    | 2.6    | 1.17 | 6.8E-01 |
| B035DRAFT_01506 | Outer membrane protein                                                                     | 4.4    | 3.1    | 4.1    | 2.9    | 3.6    | 2.5    | 0.78 | 3.5E-01 |
| B035DRAFT_01507 | Response regulator containing CheY-like receiver, AAA-type ATPase, and DNA-binding domains | 22.7   | 22.5   | 24.8   | 23.3   | 25.4   | 18.3   | 0.95 | 7.8E-01 |
| B035DRAFT_01508 | Histidine kinase-, DNA gyrase B-, and HSP90-like ATPase.                                   | 19.6   | 19.3   | 19.2   | 17.2   | 18.8   | 21.5   | 0.99 | 9.2E-01 |
| B035DRAFT_01509 | ( tRNA )                                                                                   | 20.3   | 28.8   | 24.7   | 33.2   | 28.6   | 8.2    | 0.81 | 8.1E-01 |
| B035DRAFT_01510 | hypothetical protein                                                                       | 0.0    | 0.0    | 0.0    | 0.0    | 0.0    | 0.0    | 0.00 |         |
| B035DRAFT_01511 | hypothetical protein                                                                       | 0.0    | 0.0    | 0.0    | 0.0    | 0.0    | 0.0    | 0.00 |         |
| B035DRAFT_01512 | Restriction endonuclease S subunits                                                        | 29.5   | 29.7   | 27.9   | 15.9   | 15.4   | 21.1   | 0.60 | 6.2E-02 |
| B035DRAFT_01513 | type I site-specific deoxyribonuclease, HsdR family( EC:3.1.21.3 )                         | 36.4   | 30.9   | 31.3   | 25.6   | 26.5   | 26.5   | 0.80 | 8.8E-02 |
| B035DRAFT_01514 | Uncharacterized protein conserved in bacteria                                              | 31.7   | 27.3   | 24.4   | 21.4   | 17.4   | 22.0   | 0.73 | 1.6E-01 |
| B035DRAFT_01515 | helicase, putative, RecD/TraA family( EC:3.1.11.5 )                                        | 28.0   | 20.2   | 25.0   | 22.0   | 19.5   | 7.8    | 0.62 | 4.4E-01 |
| B035DRAFT_01516 | hypothetical protein                                                                       | 17.4   | 21.0   | 16.9   | 12.4   | 15.8   | 7.6    | 0.62 | 2.8E-01 |
| B035DRAFT_01517 | HIRAN domain.                                                                              | 32.2   | 31.7   | 31.3   | 26.2   | 27.6   | 27.4   | 0.85 | 2.0E-02 |
| B035DRAFT_01518 | hypothetical protein                                                                       | 11.0   | 5.8    | 8.7    | 9.4    | 11.3   | 3.2    | 0.85 | 8.5E-01 |
| B035DRAFT_01519 | ATPases involved in chromosome partitioning                                                | 6.2    | 4.6    | 5.9    | 7.4    | 4.8    | 3.4    | 0.90 | 8.2E-01 |
| B035DRAFT_01520 | hypothetical protein                                                                       | 1.2    | 1.7    | 2.3    | 1.7    | 1.1    | 1.0    | 0.73 | 4.8E-01 |
| B035DRAFT_01521 | hypothetical protein                                                                       | 0.0    | 0.0    | 1.9    | 0.8    | 0.7    | 1.1    | 0.45 |         |
| B035DRAFT_01522 | hypothetical protein                                                                       | 3.6    | 1.7    | 3.5    | 1.5    | 0.6    | 0.0    | 0.36 | 3.2E-01 |
| B035DRAFT_01523 | hypothetical protein                                                                       | 5.6    | 3.2    | 4.1    | 2.3    | 1.0    | 2.0    | 0.40 | 1.6E-01 |
| B035DRAFT_01524 | hypothetical protein                                                                       | 20.7   | 18.6   | 20.2   | 23.1   | 29.0   | 16.2   | 1.12 | 7.3E-01 |
| B035DRAFT_01525 | DNA polymerase III, epsilon subunit and related 3'-5' exonucleases( EC:2.7.7.7 )           | 19.9   | 29.1   | 20.9   | 29.6   | 31.4   | 24.0   | 1.23 | 4.4E-01 |
| B035DRAFT_01526 | Acetyltransferase (isoleucine patch superfamily)( EC:2.3.1.18 )                            | 25.9   | 25.6   | 20.9   | 37.4   | 31.1   | 19.4   | 1.18 | 6.6E-01 |
| B035DRAFT_01527 | Histone H1-like protein Hc1.                                                               | 6.7    | 5.5    | 8.1    | 6.0    | 9.5    | 9.5    | 1.22 | 5.6E-01 |
| B035DRAFT_01528 | hypothetical protein                                                                       | 9.1    | 10.0   | 9.8    | 9.0    | 8.0    | 7.8    | 0.86 | 1.8E-01 |
| B035DRAFT_01529 | hypothetical protein                                                                       | 6.0    | 5.6    | 6.2    | 4.8    | 7.1    | 5.2    | 0.94 | 8.0E-01 |
| B035DRAFT_01530 | hypothetical protein                                                                       | 5.0    | 4.7    | 5.3    | 5.6    | 5.4    | 4.8    | 1.05 | 6.4E-01 |
| B035DRAFT_01531 | hypothetical protein                                                                       | 5.9    | 3.7    | 8.0    | 3.8    | 4.7    | 2.7    | 0.65 | 4.1E-01 |
| B035DRAFT_01532 | hypothetical protein                                                                       | 7.6    | 7.5    | 7.5    | 5.4    | 6.6    | 2.9    | 0.62 | 3.2E-01 |
| B035DRAFT_01533 | Antirestriction protein                                                                    | 9.0    | 7.3    | 9.3    | 6.3    | 5.4    | 2.4    | 0.51 | 2.7E-01 |
| B035DRAFT_01534 | hypothetical protein                                                                       | 5.9    | 7.7    | 10.7   | 4.6    | 4.6    | 0.7    | 0.31 | 3.5E-01 |
| B035DRAFT_01535 | Mismatch repair ATPase (MutS family)                                                       | 5.7    | 2.5    | 3.3    | 5.7    | 3.5    | 3.2    | 1.10 | 8.7E-01 |
| B035DRAFT_01536 | hypothetical protein                                                                       | 4.1    | 3.3    | 4.2    | 5.0    | 3.7    | 2.6    | 0.94 | 8.9E-01 |
| B035DRAFT_01537 | Muramidase (flagellum-specific) (GH73)                                                     | 1.6    | 0.9    | 2.0    | 2.0    | 2.7    | 1.2    | 1.30 | 6.5E-01 |
| B035DRAFT_01538 | hypothetical protein                                                                       | 18.0   | 9.7    | 16.0   | 23.5   | 17.2   | 6.5    | 0.98 | 9.8E-01 |
| B035DRAFT_01539 | Protein-tyrosine-phosphatase( EC:1.20.4.1 )                                                | 13.9   | 10.1   | 14.5   | 14.2   | 16.5   | 9.0    | 1.01 | 9.8E-01 |
| B035DRAFT_01540 | hypothetical protein                                                                       | 15.6   | 19.0   | 15.6   | 22.7   | 23.2   | 9.4    | 1.02 | 9.7E-01 |

|                 |                                                                                                |       |       |       |       |       |       |      |         |
|-----------------|------------------------------------------------------------------------------------------------|-------|-------|-------|-------|-------|-------|------|---------|
| B035DRAFT_01541 | hypothetical protein                                                                           | 15.5  | 18.9  | 14.9  | 20.9  | 20.3  | 15.1  | 1.13 | 5.8E-01 |
| B035DRAFT_01542 | O-6-methylguanine DNA methyltransferase( EC:2.1.1.63 )                                         | 10.5  | 10.7  | 14.0  | 12.5  | 18.5  | 15.6  | 1.31 | 3.3E-01 |
| B035DRAFT_01543 | TraX protein.                                                                                  | 8.8   | 7.4   | 8.3   | 5.7   | 7.7   | 5.2   | 0.75 | 2.6E-01 |
| B035DRAFT_01544 | Type IV secretory pathway, VirD4 components                                                    | 3.4   | 3.4   | 2.7   | 2.1   | 4.0   | 2.6   | 0.89 | 7.5E-01 |
| B035DRAFT_01545 | hypothetical protein                                                                           | 2.5   | 1.7   | 0.9   | 2.6   | 3.9   | 0.6   | 1.23 | 8.7E-01 |
| B035DRAFT_01546 | Bacteroides conjugative transposon TraN protein                                                | 3.5   | 3.8   | 3.8   | 3.5   | 3.2   | 2.6   | 0.83 | 2.7E-01 |
| B035DRAFT_01547 | Bacteroides conjugative transposon TraM protein                                                | 2.0   | 1.4   | 2.8   | 2.0   | 1.0   | 1.5   | 0.71 | 5.1E-01 |
| B035DRAFT_01548 | hypothetical protein                                                                           | 1.0   | 0.8   | 2.1   | 0.7   | 1.9   | 2.5   | 1.25 | 8.0E-01 |
| B035DRAFT_01549 | Bacteroides conjugative transposon TraK protein                                                | 1.1   | 0.7   | 0.0   | 2.4   | 0.8   | 0.5   | 1.14 | 9.1E-01 |
| B035DRAFT_01550 | hypothetical protein                                                                           | 1.5   | 1.4   | 1.3   | 1.9   | 3.3   | 0.0   | 1.83 | 3.2E-01 |
| B035DRAFT_01551 | hypothetical protein                                                                           | 1.7   | 1.7   | 0.9   | 1.6   | 1.1   | 0.9   | 0.84 | 7.2E-01 |
| B035DRAFT_01552 | hypothetical protein                                                                           | 1.9   | 1.1   | 2.4   | 1.8   | 1.1   | 1.3   | 0.80 | 6.3E-01 |
| B035DRAFT_01553 | hypothetical protein                                                                           | 1.8   | 2.4   | 2.2   | 1.4   | 2.1   | 0.6   | 0.58 | 4.1E-01 |
| B035DRAFT_01554 | Bacteroides conjugation system ATPase, TraG family                                             | 5.9   | 5.0   | 6.2   | 5.5   | 4.5   | 3.6   | 0.79 | 3.5E-01 |
| B035DRAFT_01555 | hypothetical protein                                                                           | 2.3   | 5.4   | 2.1   | 2.4   | 4.2   | 2.1   | 0.94 | 9.3E-01 |
| B035DRAFT_01556 | hypothetical protein                                                                           | 6.8   | 7.9   | 5.7   | 6.7   | 1.9   | 3.5   | 0.53 | 3.6E-01 |
| B035DRAFT_01557 | hypothetical protein                                                                           | 3.7   | 2.9   | 1.2   | 1.8   | 2.7   | 2.2   | 0.95 | 9.5E-01 |
| B035DRAFT_01558 | hypothetical protein                                                                           | 2.0   | 3.0   | 4.1   | 2.1   | 1.3   | 0.8   | 0.44 | 2.5E-01 |
| B035DRAFT_01559 | hypothetical protein                                                                           | 3.5   | 0.9   | 3.8   | 2.4   | 1.7   | 0.7   | 0.63 | 6.7E-01 |
| B035DRAFT_01560 | ATPases involved in chromosome partitioning                                                    | 4.0   | 3.9   | 3.8   | 2.1   | 2.7   | 1.3   | 0.49 | 1.5E-01 |
| B035DRAFT_01561 | Relaxase/Mobilisation nuclease domain.                                                         | 1.0   | 0.9   | 1.9   | 1.4   | 1.4   | 1.0   | 1.08 | 8.9E-01 |
| B035DRAFT_01562 | hypothetical protein                                                                           | 6.5   | 4.5   | 9.0   | 5.9   | 3.5   | 2.0   | 0.54 | 3.7E-01 |
| B035DRAFT_01563 | hypothetical protein                                                                           | 14.7  | 10.4  | 18.9  | 17.2  | 17.0  | 11.1  | 1.04 | 9.3E-01 |
| B035DRAFT_01564 | hypothetical protein                                                                           | 8.0   | 15.0  | 3.9   | 10.2  | 4.4   | 7.3   | 0.88 | 8.9E-01 |
| B035DRAFT_01565 | hypothetical protein                                                                           | 12.5  | 11.9  | 11.1  | 10.5  | 12.4  | 12.1  | 0.98 | 8.7E-01 |
| B035DRAFT_01566 | pyruvate, phosphate dikinase( EC:2.7.9.1 )                                                     | 349.6 | 354.9 | 356.6 | 338.0 | 387.7 | 394.3 | 1.05 | 5.6E-01 |
| B035DRAFT_01567 | 23S rRNA (uracil-5-)-methyltransferase RumA                                                    | 307.5 | 318.1 | 304.6 | 338.0 | 371.9 | 404.7 | 1.20 | 1.4E-01 |
| B035DRAFT_01568 | pseudouridine synthase, RluA family( EC:5.4.99.23 )                                            | 317.6 | 327.9 | 300.0 | 338.4 | 382.6 | 402.8 | 1.19 | 1.7E-01 |
| B035DRAFT_01569 | HAD-superfamily hydrolase, subfamily IIB                                                       | 50.9  | 68.3  | 56.2  | 68.9  | 68.9  | 97.5  | 1.33 | 3.0E-01 |
| B035DRAFT_01570 | Uncharacterized protein conserved in bacteria                                                  | 34.0  | 34.4  | 30.2  | 40.5  | 55.4  | 51.1  | 1.48 | 1.0E-01 |
| B035DRAFT_01571 | Uncharacterized membrane protein                                                               | 39.7  | 48.9  | 42.2  | 51.2  | 62.1  | 52.6  | 1.27 | 1.9E-01 |
| B035DRAFT_01572 | Signal transduction histidine kinase( EC:2.7.13.3 )                                            | 25.4  | 30.4  | 22.6  | 24.0  | 25.4  | 35.9  | 1.08 | 8.0E-01 |
| B035DRAFT_01573 | Osmosensitive K+ channel His kinase sensor domain.( EC:2.7.13.3 )                              | 27.3  | 20.8  | 24.5  | 16.1  | 17.0  | 25.4  | 0.79 | 4.4E-01 |
| B035DRAFT_01574 | Bacteriophage protein gp37                                                                     | 17.7  | 22.6  | 14.7  | 19.7  | 20.4  | 26.0  | 1.21 | 4.9E-01 |
| B035DRAFT_01575 | NTP pyrophosphohydrolases including oxidative damage repair enzymes( EC:3.6.1.13 )             | 68.8  | 81.0  | 75.9  | 83.0  | 77.0  | 105.4 | 1.17 | 4.2E-01 |
| B035DRAFT_01576 | Methylase involved in ubiquinone/menaquinone biosynthesis                                      | 191.4 | 206.9 | 202.7 | 213.0 | 212.6 | 234.5 | 1.10 | 2.4E-01 |
| B035DRAFT_01577 | Transcriptional regulator containing an amidase domain and an AraC-type DNA-binding HTH domain | 10.0  | 10.4  | 12.2  | 12.9  | 10.1  | 8.6   | 0.96 | 8.8E-01 |
| B035DRAFT_01578 | Lactoylglutathione lyase and related lyases                                                    | 6.8   | 2.6   | 9.6   | 10.7  | 3.1   | 7.2   | 1.11 | 9.2E-01 |
| B035DRAFT_01579 | hypothetical protein                                                                           | 6.3   | 7.8   | 5.9   | 0.7   | 2.1   | 5.5   | 0.31 | 3.0E-01 |
| B035DRAFT_01580 | Sugar kinases, ribokinase family( EC:2.7.1.4 )                                                 | 4.1   | 4.3   | 3.1   | 2.2   | 3.7   | 4.4   | 0.88 | 7.7E-01 |
| B035DRAFT_01581 | Threonine dehydrogenase and related Zn-dependent dehydrogenases( EC:1.1.1.14 )                 | 7.6   | 5.5   | 7.5   | 5.3   | 6.0   | 5.1   | 0.81 | 3.4E-01 |
| B035DRAFT_01582 | sugar (Glycoside-Pentoside-Hexuronide) transporter                                             | 4.5   | 5.0   | 5.1   | 4.6   | 5.1   | 5.2   | 1.02 | 8.9E-01 |
| B035DRAFT_01583 | Transcriptional regulators                                                                     | 35.1  | 46.1  | 41.9  | 42.6  | 42.4  | 48.4  | 1.09 | 6.1E-01 |
| B035DRAFT_01584 | Predicted P-loop ATPase fused to an acetyltransferase                                          | 37.0  | 45.6  | 40.1  | 48.4  | 45.3  | 53.9  | 1.20 | 2.4E-01 |
| B035DRAFT_01585 | Beta-lactamase class A( EC:3.5.2.6 )                                                           | 25.9  | 30.9  | 28.5  | 36.1  | 46.6  | 53.4  | 1.58 | 1.2E-01 |
| B035DRAFT_01586 | Glucosylase and related glycosyl hydrolases (GH15)                                             | 6.1   | 4.2   | 2.8   | 2.1   | 2.9   | 3.4   | 0.67 | 4.2E-01 |
| B035DRAFT_01587 | trehalose-phosphatase( EC:2.4.1.15 ) (GT20)                                                    | 8.2   | 7.0   | 7.1   | 4.0   | 3.5   | 4.9   | 0.56 | 5.4E-02 |
| B035DRAFT_01588 | Aspartokinases( EC:2.7.2.4 )                                                                   | 6.0   | 3.6   | 4.9   | 2.0   | 1.9   | 3.2   | 0.48 | 1.4E-01 |

|                 |                                                                                                 |        |        |        |       |       |       |      |         |
|-----------------|-------------------------------------------------------------------------------------------------|--------|--------|--------|-------|-------|-------|------|---------|
| B035DRAFT_01589 | Chloramphenicol O-acetyltransferase( EC:2.3.1.28 )                                              | 34.5   | 39.8   | 36.2   | 52.0  | 47.9  | 65.2  | 1.48 | 1.0E-01 |
| B035DRAFT_01590 | Predicted hydrolase (HAD superfamily)                                                           | 18.9   | 24.2   | 20.6   | 21.1  | 20.0  | 33.6  | 1.15 | 6.7E-01 |
| B035DRAFT_01591 | Bacterial protein of unknown function (Gcw_chp).                                                | 11.8   | 10.4   | 12.0   | 6.6   | 7.2   | 10.1  | 0.69 | 1.9E-01 |
| B035DRAFT_01592 | hypothetical protein                                                                            | 1.5    | 1.7    | 9.0    | 0.0   | 4.0   | 6.7   | 1.83 | 6.1E-01 |
| B035DRAFT_01593 | K+-transporting ATPase, C subunit( EC:3.6.3.12 )                                                | 6.5    | 10.3   | 5.8    | 4.4   | 4.0   | 4.6   | 0.59 | 1.7E-01 |
| B035DRAFT_01594 | K+-transporting ATPase, B subunit( EC:3.6.3.12 )                                                | 11.5   | 8.9    | 11.0   | 7.4   | 7.7   | 6.3   | 0.68 | 1.1E-01 |
| B035DRAFT_01595 | K+-transporting ATPase, KdpA( EC:3.6.3.12 )                                                     | 8.3    | 8.9    | 7.3    | 4.6   | 5.9   | 6.5   | 0.69 | 1.5E-01 |
| B035DRAFT_01596 | hypothetical protein                                                                            | 0.0    | 0.0    | 0.0    | 2.5   | 1.1   | 0.0   | 0.00 |         |
| B035DRAFT_01597 | Arylsulfatase A and related enzymes                                                             | 64.3   | 73.3   | 65.3   | 46.4  | 56.9  | 62.8  | 0.81 | 2.8E-01 |
| B035DRAFT_01598 | Response regulator containing CheY-like receiver, AAA-type ATPase, and DNA-binding domains      | 77.8   | 83.4   | 77.2   | 71.2  | 79.5  | 95.8  | 1.03 | 8.8E-01 |
| B035DRAFT_01599 | glycine betaine/L-proline transport ATP binding subunit( EC:3.6.3.32 )                          | 539.5  | 512.6  | 475.4  | 332.3 | 193.3 | 203.1 | 0.46 | 8.2E-02 |
| B035DRAFT_01600 | ABC-type proline/glycine betaine transport system, permease component                           | 497.4  | 464.1  | 471.9  | 334.5 | 204.7 | 216.2 | 0.51 | 8.5E-02 |
| B035DRAFT_01601 | ABC-type proline/glycine betaine transport systems, periplasmic components                      | 320.2  | 311.6  | 337.0  | 210.2 | 115.2 | 104.5 | 0.42 | 9.9E-02 |
| B035DRAFT_01602 | Permeases of the drug/metabolite transporter (DMT) superfamily                                  | 278.6  | 312.6  | 306.0  | 165.3 | 93.8  | 123.0 | 0.42 | 5.8E-02 |
| B035DRAFT_01603 | Acetyltransferase (isoleucine patch superfamily)( EC:2.3.1.79 )                                 | 256.3  | 330.1  | 325.4  | 198.2 | 122.7 | 182.3 | 0.54 | 1.2E-01 |
| B035DRAFT_01604 | Protein of unknown function (DUF2582).                                                          | 268.4  | 304.0  | 236.5  | 212.7 | 229.3 | 206.8 | 0.81 | 1.9E-01 |
| B035DRAFT_01605 | Tryptophan-rich sensory protein (mitochondrial benzodiazepine receptor homolog)                 | 182.4  | 212.4  | 193.2  | 30.6  | 28.3  | 41.3  | 0.17 | 4.2E-03 |
| B035DRAFT_01606 | hypothetical protein                                                                            | 1574.4 | 1852.6 | 1515.5 | 186.5 | 157.1 | 202.7 | 0.11 | 8.3E-04 |
| B035DRAFT_01607 | Glucuronate isomerase( EC:5.3.1.12 )                                                            | 185.9  | 144.6  | 109.1  | 154.8 | 157.8 | 200.0 | 1.19 | 5.9E-01 |
| B035DRAFT_01608 | hypothetical protein                                                                            | 17.3   | 28.7   | 20.5   | 19.5  | 23.5  | 31.8  | 1.13 | 7.6E-01 |
| B035DRAFT_01609 | Arylsulfatase A and related enzymes                                                             | 37.8   | 43.8   | 39.5   | 36.2  | 39.7  | 48.2  | 1.02 | 9.2E-01 |
| B035DRAFT_01610 | hypothetical protein                                                                            | 44.8   | 47.9   | 47.5   | 49.1  | 54.2  | 66.3  | 1.20 | 3.0E-01 |
| B035DRAFT_01611 | ATP-dependent exoDNAse (exonuclease V) beta subunit (contains helicase and exonuclease domains) | 80.1   | 79.0   | 74.2   | 75.7  | 86.9  | 90.6  | 1.08 | 4.6E-01 |
| B035DRAFT_01612 | Long-chain acyl-CoA synthetases (AMP-forming)( EC:6.2.1.3 )                                     | 159.7  | 156.5  | 151.3  | 139.9 | 138.1 | 138.9 | 0.89 | 3.0E-02 |
| B035DRAFT_01613 | Protein of unknown function (DUF2874).                                                          | 178.3  | 171.3  | 164.1  | 129.9 | 115.0 | 142.2 | 0.75 | 8.2E-02 |
| B035DRAFT_01614 | hypothetical protein                                                                            | 53.1   | 76.7   | 52.9   | 56.7  | 55.4  | 56.3  | 0.94 | 7.8E-01 |
| B035DRAFT_01615 | N-acetyl-beta-hexosaminidase( EC:3.2.1.52 ) (GH20)                                              | 277.4  | 276.8  | 251.0  | 257.7 | 359.9 | 407.5 | 1.25 | 3.9E-01 |
| B035DRAFT_01616 | ( tRNA )                                                                                        | 63.6   | 66.3   | 69.4   | 97.0  | 59.7  | 53.8  | 1.02 | 9.6E-01 |
| B035DRAFT_01617 | hypothetical protein                                                                            | 151.8  | 161.7  | 150.5  | 187.1 | 211.7 | 222.8 | 1.34 | 6.1E-02 |
| B035DRAFT_01618 | crossover junction endodeoxyribonuclease RuvC( EC:3.1.22.4 )                                    | 100.8  | 97.1   | 76.1   | 103.6 | 119.0 | 131.7 | 1.30 | 2.4E-01 |
| B035DRAFT_01619 | pullulanase, type I( EC:3.2.1.41 ) (CBM48)                                                      | 98.0   | 105.0  | 80.1   | 77.4  | 104.3 | 104.0 | 1.01 | 9.8E-01 |
| B035DRAFT_01620 | mannonate dehydratase( EC:4.2.1.8 )                                                             | 78.9   | 104.1  | 87.5   | 82.1  | 89.1  | 91.5  | 0.98 | 8.9E-01 |
| B035DRAFT_01621 | Predicted esterase of the alpha-beta hydrolase superfamily                                      | 40.3   | 41.0   | 40.0   | 33.0  | 29.0  | 32.6  | 0.78 | 4.5E-02 |
| B035DRAFT_01622 | isoleucyl-tRNA synthetase( EC:6.1.1.5 )                                                         | 477.7  | 492.2  | 444.7  | 424.3 | 501.6 | 537.8 | 1.03 | 8.4E-01 |
| B035DRAFT_01623 | DnaK suppressor protein                                                                         | 559.5  | 641.7  | 541.7  | 704.3 | 747.6 | 891.7 | 1.34 | 1.4E-01 |
| B035DRAFT_01624 | Lipoprotein signal peptidase( EC:3.4.23.36 )                                                    | 434.3  | 513.0  | 502.1  | 514.3 | 557.4 | 739.4 | 1.24 | 3.5E-01 |
| B035DRAFT_01625 | hypothetical protein                                                                            | 220.4  | 262.9  | 258.7  | 245.5 | 276.4 | 326.5 | 1.14 | 4.7E-01 |
| B035DRAFT_01626 | hypothetical protein                                                                            | 136.9  | 190.4  | 201.8  | 163.7 | 157.3 | 207.0 | 1.00 | 9.9E-01 |
| B035DRAFT_01627 | rRNA methylases                                                                                 | 85.9   | 102.5  | 87.4   | 80.8  | 86.2  | 88.9  | 0.93 | 5.2E-01 |
| B035DRAFT_01628 | Outer membrane protein/protective antigen OMA87                                                 | 134.0  | 147.0  | 139.4  | 174.5 | 173.8 | 191.3 | 1.28 | 4.3E-02 |
| B035DRAFT_01629 | hypothetical protein                                                                            | 88.2   | 112.0  | 97.4   | 114.3 | 102.1 | 125.8 | 1.15 | 4.0E-01 |
| B035DRAFT_01630 | hypothetical protein                                                                            | 249.7  | 280.0  | 242.7  | 334.9 | 255.8 | 316.9 | 1.17 | 3.7E-01 |
| B035DRAFT_01631 | hypothetical protein                                                                            | 260.0  | 324.5  | 253.7  | 359.4 | 275.8 | 350.6 | 1.18 | 4.4E-01 |
| B035DRAFT_01632 | Metal-dependent hydrolases of the beta-lactamase superfamily I                                  | 198.3  | 235.0  | 200.2  | 180.5 | 169.3 | 223.8 | 0.90 | 5.7E-01 |
| B035DRAFT_01633 | ( tRNA )                                                                                        | 346.7  | 449.6  | 503.1  | 285.5 | 187.4 | 147.5 | 0.47 | 1.3E-01 |
| B035DRAFT_01634 | hypothetical protein                                                                            | 392.0  | 513.6  | 529.6  | 418.5 | 396.9 | 483.4 | 0.91 | 6.4E-01 |
| B035DRAFT_01635 | ( tRNA )                                                                                        | 35.6   | 56.8   | 78.4   | 44.5  | 36.3  | 99.0  | 1.00 | 1.0E+00 |

|                 |                                                                                                           |        |        |        |        |        |        |  |      |         |
|-----------------|-----------------------------------------------------------------------------------------------------------|--------|--------|--------|--------|--------|--------|--|------|---------|
| B035DRAFT_01636 | ( tRNA )                                                                                                  | 42.8   | 31.4   | 43.9   | 56.9   | 36.8   | 40.9   |  | 1.13 | 6.9E-01 |
| B035DRAFT_01637 | ferrous iron transporter FeoB                                                                             | 320.0  | 274.6  | 240.1  | 263.1  | 197.9  | 289.0  |  | 0.89 | 6.6E-01 |
| B035DRAFT_01638 | tRNA(Ile)-lysine synthetase, N-terminal domain/tRNA(Ile)-lysine synthetase, C-terminal domain( EC:6.3.4.) | 67.3   | 69.3   | 70.9   | 74.2   | 62.8   | 80.8   |  | 1.04 | 7.6E-01 |
| B035DRAFT_01639 | hypothetical protein                                                                                      | 118.0  | 111.8  | 125.0  | 99.3   | 93.7   | 97.7   |  | 0.82 | 5.5E-02 |
| B035DRAFT_01640 | hypothetical protein                                                                                      | 36.7   | 35.0   | 27.1   | 46.9   | 28.5   | 32.1   |  | 1.07 | 8.4E-01 |
| B035DRAFT_01641 | ( tRNA )                                                                                                  | 484.2  | 942.5  | 1377.2 | 879.3  | 706.1  | 1298.1 |  | 1.09 | 9.1E-01 |
| B035DRAFT_01642 | hypothetical protein                                                                                      | 200.7  | 241.8  | 269.2  | 180.1  | 178.3  | 207.5  |  | 0.80 | 2.5E-01 |
| B035DRAFT_01643 | formate acetyltransferase 1( EC:2.3.1.54 )                                                                | 1680.0 | 1629.0 | 1473.9 | 1168.0 | 1142.7 | 1212.5 |  | 0.74 | 3.0E-02 |
| B035DRAFT_01644 | pyruvate formate-lyase 1-activating enzyme( EC:1.97.1.4 )                                                 | 470.2  | 461.1  | 385.7  | 260.8  | 318.4  | 307.0  |  | 0.67 | 7.7E-02 |
| B035DRAFT_01645 | hypothetical protein                                                                                      | 634.1  | 651.2  | 563.9  | 399.7  | 461.0  | 394.4  |  | 0.68 | 4.6E-02 |
| B035DRAFT_01646 | Uncharacterized conserved protein                                                                         | 233.0  | 202.4  | 188.4  | 117.6  | 151.0  | 100.3  |  | 0.59 | 9.5E-02 |
| B035DRAFT_01647 | Uncharacterized conserved protein containing a ferredoxin-like domain                                     | 386.1  | 373.8  | 363.7  | 272.6  | 227.2  | 167.4  |  | 0.58 | 1.1E-01 |
| B035DRAFT_01648 | Fe-S oxidoreductase                                                                                       | 566.5  | 501.9  | 536.2  | 451.9  | 318.2  | 265.2  |  | 0.63 | 1.7E-01 |
| B035DRAFT_01649 | Predicted phosphohydrolases                                                                               | 216.9  | 212.4  | 221.5  | 167.6  | 214.2  | 242.8  |  | 0.95 | 8.0E-01 |
| B035DRAFT_01650 | Calcineurin-like phosphoesterase.                                                                         | 271.4  | 250.3  | 239.3  | 214.4  | 246.9  | 220.8  |  | 0.90 | 3.1E-01 |
| B035DRAFT_01651 | Response regulator containing a CheY-like receiver domain and an HTH DNA-binding domain                   | 1265.1 | 1412.2 | 1328.2 | 976.7  | 997.4  | 1011.5 |  | 0.75 | 2.0E-02 |
| B035DRAFT_01652 | hypothetical protein                                                                                      | 1516.7 | 1662.6 | 1494.4 | 1141.3 | 1131.3 | 1128.7 |  | 0.73 | 1.6E-02 |
| B035DRAFT_01653 | Formate-dependent phosphoribosylglycinamide formyltransferase (GAR transformylase)( EC:2.1.2.2 )          | 191.4  | 200.2  | 202.0  | 200.3  | 229.6  | 193.4  |  | 1.05 | 6.4E-01 |
| B035DRAFT_01654 | Putative stress-responsive transcriptional regulator                                                      | 88.1   | 76.0   | 89.5   | 116.2  | 141.9  | 126.1  |  | 1.51 | 5.7E-02 |
| B035DRAFT_01655 | Predicted transcriptional regulators                                                                      | 104.4  | 84.1   | 75.4   | 174.6  | 171.9  | 130.5  |  | 1.81 | 8.0E-02 |
| B035DRAFT_01656 | Acetyltransferases                                                                                        | 47.1   | 62.3   | 46.2   | 40.4   | 54.7   | 63.2   |  | 1.01 | 9.8E-01 |
| B035DRAFT_01657 | Predicted DNA alkylation repair enzyme                                                                    | 103.0  | 105.9  | 91.8   | 85.8   | 92.8   | 81.8   |  | 0.87 | 2.2E-01 |
| B035DRAFT_01658 | O-6-methylguanine DNA methyltransferase( EC:2.1.1.63 )                                                    | 147.7  | 139.4  | 115.2  | 102.4  | 132.2  | 119.6  |  | 0.88 | 5.1E-01 |
| B035DRAFT_01659 | Peptide-N-glycosidase F, N terminal./Peptide-N-glycosidase F, C terminal.                                 | 121.6  | 128.4  | 115.3  | 94.3   | 111.9  | 122.3  |  | 0.89 | 4.6E-01 |
| B035DRAFT_01660 | hypothetical protein                                                                                      | 343.4  | 332.6  | 321.7  | 332.7  | 403.0  | 389.7  |  | 1.12 | 3.2E-01 |
| B035DRAFT_01661 | (p)ppGpp synthetase, RelA/SpoT family( EC:2.7.6.5 )                                                       | 92.2   | 112.4  | 99.8   | 145.3  | 146.4  | 158.1  |  | 1.48 | 4.2E-02 |
| B035DRAFT_01662 | Dialcylglycerol kinase( EC:2.7.1.107 )                                                                    | 55.8   | 62.7   | 55.7   | 62.3   | 74.4   | 73.3   |  | 1.20 | 2.0E-01 |
| B035DRAFT_01663 | Protein of unknown function (DUF1573).                                                                    | 421.7  | 464.5  | 397.4  | 647.6  | 582.6  | 703.2  |  | 1.50 | 4.7E-02 |
| B035DRAFT_01664 | Predicted phosphohydrolases                                                                               | 93.2   | 99.2   | 90.5   | 121.6  | 115.9  | 134.2  |  | 1.31 | 5.6E-02 |
| B035DRAFT_01665 | hypothetical protein                                                                                      | 67.1   | 82.1   | 78.6   | 100.7  | 95.9   | 117.6  |  | 1.38 | 1.1E-01 |
| B035DRAFT_01666 | putative oligopeptide transporter, OPT family                                                             | 142.0  | 152.5  | 136.6  | 95.9   | 116.8  | 106.1  |  | 0.74 | 7.3E-02 |
| B035DRAFT_01667 | Esterase/lipase (CE10)                                                                                    | 91.7   | 110.1  | 116.7  | 114.2  | 123.5  | 107.4  |  | 1.09 | 5.8E-01 |
| B035DRAFT_01668 | Ferritin-like protein( EC:1.16.3.1 )                                                                      | 178.7  | 186.2  | 169.4  | 180.4  | 234.0  | 215.8  |  | 1.17 | 3.1E-01 |
| B035DRAFT_01669 | ribosomal protein S16                                                                                     | 8440.6 | 9637.3 | 8907.7 | 9192.9 | 8020.1 | 8525.0 |  | 0.95 | 6.4E-01 |
| B035DRAFT_01670 | Predicted extracellular nuclease                                                                          | 47.6   | 47.7   | 40.5   | 24.8   | 38.9   | 41.7   |  | 0.76 | 3.9E-01 |
| B035DRAFT_01671 | hypothetical protein                                                                                      | 387.1  | 424.1  | 363.5  | 206.9  | 303.2  | 386.4  |  | 0.74 | 3.9E-01 |
| B035DRAFT_01672 | Outer membrane receptor proteins, mostly Fe transport                                                     | 275.0  | 291.7  | 251.9  | 127.2  | 183.3  | 207.8  |  | 0.62 | 1.5E-01 |
| B035DRAFT_01673 | ATP-binding cassette protein, ChvD family                                                                 | 372.5  | 383.9  | 379.3  | 351.4  | 339.5  | 282.6  |  | 0.85 | 2.4E-01 |
| B035DRAFT_01674 | Arabinose efflux permease                                                                                 | 294.7  | 322.6  | 322.9  | 241.4  | 240.8  | 240.1  |  | 0.77 | 2.0E-02 |
| B035DRAFT_01675 | 3-methyl-2-oxobutanoate hydroxymethyltransferase( EC:2.1.2.11 )                                           | 1034.3 | 1050.4 | 1052.5 | 918.3  | 765.4  | 667.1  |  | 0.74 | 1.5E-01 |
| B035DRAFT_01676 | haloacid dehalogenase superfamily, subfamily IA, variant 3 with third motif having DD or ED               | 848.3  | 895.2  | 784.6  | 879.8  | 761.9  | 739.8  |  | 0.94 | 6.1E-01 |
| B035DRAFT_01677 | NhaP-type Na+/H+ and K+/H+ antiporters with a unique C-terminal domain                                    | 149.3  | 160.5  | 150.2  | 129.1  | 113.1  | 133.1  |  | 0.81 | 1.1E-01 |
| B035DRAFT_01678 | Mn2+ and Fe2+ transporters of the NRAMP family                                                            | 418.1  | 426.5  | 396.2  | 283.8  | 255.6  | 257.0  |  | 0.64 | 1.1E-02 |
| B035DRAFT_01679 | hypothetical protein                                                                                      | 136.7  | 148.6  | 130.0  | 130.8  | 135.7  | 175.9  |  | 1.06 | 7.7E-01 |
| B035DRAFT_01680 | hypothetical protein                                                                                      | 353.3  | 392.2  | 325.8  | 403.1  | 434.4  | 479.9  |  | 1.23 | 1.8E-01 |
| B035DRAFT_01681 | RNA polymerase sigma factor, sigma-70 family                                                              | 6314.3 | 6183.0 | 6570.3 | 7713.2 | 6770.7 | 6743.4 |  | 1.11 | 2.6E-01 |

|                 |                                                                                                           |         |         |          |          |         |         |      |         |
|-----------------|-----------------------------------------------------------------------------------------------------------|---------|---------|----------|----------|---------|---------|------|---------|
| B035DRAFT_01682 | Trypsin-like serine proteases, typically periplasmic, contain C-terminal PDZ domain                       | 214.3   | 190.3   | 179.1    | 329.7    | 414.1   | 322.8   | 1.82 | 4.0E-02 |
| B035DRAFT_01683 | ( miscRNA )                                                                                               | 70807.8 | 50756.1 | 114687.4 | 188739.8 | 87287.0 | 20623.3 | 0.94 | 9.7E-01 |
| B035DRAFT_01684 | Predicted membrane protein                                                                                | 154.0   | 178.5   | 176.0    | 184.0    | 175.4   | 203.9   | 1.11 | 3.9E-01 |
| B035DRAFT_01685 | riboflavin synthase, alpha subunit( EC:2.5.1.9 )                                                          | 287.7   | 309.5   | 309.3    | 338.9    | 328.7   | 304.3   | 1.07 | 3.6E-01 |
| B035DRAFT_01686 | Predicted transcriptional regulators                                                                      | 85.9    | 104.7   | 80.7     | 100.0    | 103.7   | 88.0    | 1.08 | 6.5E-01 |
| B035DRAFT_01687 | Acyl-CoA synthetases (AMP-forming)/AMP-acid ligases II( EC:6.2.1.)                                        | 86.6    | 86.5    | 91.2     | 72.4     | 84.5    | 100.1   | 0.96 | 8.5E-01 |
| B035DRAFT_01688 | Beta-galactosidase/beta-glucuronidase( EC:3.2.1.23 ) (GH2)                                                | 80.9    | 68.7    | 72.4     | 77.7     | 87.4    | 71.1    | 1.06 | 6.6E-01 |
| B035DRAFT_01689 | cytochrome d oxidase, subunit II (cydB)( EC:1.10.3.)                                                      | 277.7   | 208.4   | 152.3    | 151.3    | 148.3   | 202.8   | 0.80 | 5.4E-01 |
| B035DRAFT_01690 | Cytochrome bd-type quinol oxidase, subunit 1( EC:1.10.3.)                                                 | 257.4   | 193.2   | 171.7    | 151.7    | 139.2   | 117.8   | 0.66 | 1.7E-01 |
| B035DRAFT_01691 | hypothetical protein                                                                                      | 81.0    | 75.3    | 51.6     | 74.7     | 62.9    | 99.5    | 1.14 | 7.1E-01 |
| B035DRAFT_01692 | Outer membrane protein                                                                                    | 1.3     | 2.3     | 1.2      | 1.1      | 1.6     | 2.3     | 1.02 | 9.7E-01 |
| B035DRAFT_01693 | RND family efflux transporter, MFP subunit                                                                | 2.5     | 1.9     | 2.0      | 2.3      | 2.8     | 2.4     | 1.17 | 3.8E-01 |
| B035DRAFT_01694 | ABC-type antimicrobial peptide transport system, ATPase component                                         | 3.4     | 2.9     | 1.9      | 3.3      | 3.3     | 2.9     | 1.19 | 5.9E-01 |
| B035DRAFT_01695 | ABC-type antimicrobial peptide transport system, permease component                                       | 4.8     | 4.5     | 4.0      | 3.9      | 4.0     | 3.4     | 0.85 | 2.6E-01 |
| B035DRAFT_01696 | Putative regulator of cell autolysis                                                                      | 6.4     | 10.6    | 11.7     | 16.8     | 15.7    | 17.0    | 1.78 | 1.6E-01 |
| B035DRAFT_01697 | Response regulator of the LytR/AlgR family                                                                | 14.9    | 20.6    | 19.8     | 20.3     | 20.2    | 26.9    | 1.22 | 4.3E-01 |
| B035DRAFT_01698 | uncharacterized protein TIGR03905                                                                         | 472.0   | 455.8   | 482.2    | 486.6    | 484.0   | 376.5   | 0.95 | 7.5E-01 |
| B035DRAFT_01699 | DNA-binding regulatory protein, YebC/PmpR family                                                          | 454.4   | 455.0   | 406.6    | 384.2    | 481.9   | 474.1   | 1.01 | 9.3E-01 |
| B035DRAFT_01700 | phenylalanyl-tRNA synthetase, beta subunit, non-spirochete bacterial( EC:6.1.1.20 )                       | 446.5   | 466.1   | 454.8    | 401.7    | 456.0   | 475.3   | 0.97 | 7.8E-01 |
| B035DRAFT_01701 | replicative DNA helicase( EC:3.6.4.12 )                                                                   | 130.5   | 126.0   | 117.6    | 130.6    | 136.4   | 92.1    | 0.95 | 8.2E-01 |
| B035DRAFT_01702 | 4-diphosphocytidyl-2C-methyl-D-erythritol kinase( EC:2.7.1.148 )                                          | 295.4   | 319.0   | 299.6    | 263.9    | 200.1   | 245.7   | 0.77 | 1.6E-01 |
| B035DRAFT_01703 | ( miscRNA )                                                                                               | 5132.1  | 7908.3  | 8085.1   | 9719.0   | 7503.2  | 7235.7  | 1.17 | 6.2E-01 |
| B035DRAFT_01704 | UDP-glucose-4-epimerase( EC:5.1.3.2 )                                                                     | 989.9   | 1061.1  | 1066.5   | 908.7    | 991.8   | 1070.1  | 0.95 | 6.0E-01 |
| B035DRAFT_01705 | hypothetical protein                                                                                      | 500.4   | 490.8   | 418.7    | 406.0    | 514.7   | 445.5   | 0.97 | 8.5E-01 |
| B035DRAFT_01706 | electron transport complex, RnfABCDGE type, A subunit                                                     | 232.0   | 260.8   | 264.9    | 209.7    | 236.2   | 273.2   | 0.95 | 7.3E-01 |
| B035DRAFT_01707 | electron transport complex, RnfABCDGE type, E subunit                                                     | 146.1   | 161.8   | 166.6    | 138.6    | 149.2   | 153.0   | 0.93 | 4.2E-01 |
| B035DRAFT_01708 | electron transport complex, RnfABCDGE type, G subunit                                                     | 209.7   | 169.3   | 192.8    | 156.4    | 188.0   | 140.7   | 0.85 | 3.9E-01 |
| B035DRAFT_01709 | electron transport complex, RnfABCDGE type, D subunit                                                     | 203.6   | 193.2   | 198.5    | 160.9    | 201.8   | 172.6   | 0.90 | 3.8E-01 |
| B035DRAFT_01710 | electron transport complex, RnfABCDGE type, C subunit                                                     | 260.6   | 226.6   | 241.5    | 193.0    | 231.4   | 152.0   | 0.78 | 3.1E-01 |
| B035DRAFT_01711 | Predicted NADH:ubiquinone oxidoreductase, subunit RnfB                                                    | 275.0   | 242.3   | 252.8    | 199.2    | 223.5   | 111.3   | 0.67 | 3.3E-01 |
| B035DRAFT_01712 | Positive regulator of sigma E activity                                                                    | 238.4   | 292.0   | 263.4    | 273.3    | 226.0   | 221.0   | 0.91 | 5.4E-01 |
| B035DRAFT_01713 | Permeases of the drug/metabolite transporter (DMT) superfamily                                            | 245.9   | 213.2   | 233.0    | 117.8    | 90.3    | 115.7   | 0.47 | 2.3E-02 |
| B035DRAFT_01714 | Cyanate permease                                                                                          | 248.6   | 245.3   | 264.9    | 192.6    | 145.5   | 180.5   | 0.68 | 8.0E-02 |
| B035DRAFT_01715 | glutamate decarboxylase( EC:4.1.1.15 )                                                                    | 2703.5  | 1786.4  | 2164.2   | 2316.5   | 2475.4  | 2537.5  | 1.12 | 6.2E-01 |
| B035DRAFT_01716 | glutaminase A( EC:3.5.1.2 )                                                                               | 1323.1  | 971.2   | 1140.7   | 1292.1   | 1362.2  | 1693.4  | 1.27 | 3.1E-01 |
| B035DRAFT_01717 | Alpha-L-fucosidase( EC:3.2.1.51 ) (GH29)                                                                  | 145.4   | 141.3   | 135.3    | 125.7    | 148.5   | 149.3   | 1.00 | 1.0E+00 |
| B035DRAFT_01718 | Uncharacterized protein involved in copper resistance                                                     | 193.1   | 218.8   | 187.5    | 168.6    | 195.0   | 199.2   | 0.94 | 6.2E-01 |
| B035DRAFT_01719 | Transglutaminase-like enzymes, putative cysteine proteases                                                | 210.0   | 188.4   | 198.7    | 191.0    | 203.6   | 161.8   | 0.93 | 5.9E-01 |
| B035DRAFT_01720 | ion channel.                                                                                              | 106.6   | 109.4   | 111.2    | 101.6    | 80.0    | 90.6    | 0.83 | 1.9E-01 |
| B035DRAFT_01721 | putative glutamate/gamma-aminobutyrate antiporter                                                         | 609.8   | 457.1   | 536.2    | 465.2    | 481.4   | 483.8   | 0.90 | 4.8E-01 |
| B035DRAFT_01722 | His Kinase A (phosphoacceptor) domain./PAS fold./Histidine kinase-, DNA gyrase B-, and HSP90-like ATPase. | 53.4    | 59.8    | 52.1     | 65.8     | 64.2    | 73.1    | 1.23 | 1.2E-01 |
| B035DRAFT_01723 | Na+/H+ antiporter NhaA                                                                                    | 181.9   | 159.8   | 157.8    | 120.5    | 159.1   | 141.9   | 0.84 | 3.2E-01 |
| B035DRAFT_01724 | hypothetical protein                                                                                      | 324.4   | 317.4   | 315.7    | 308.0    | 341.7   | 350.3   | 1.04 | 5.7E-01 |
| B035DRAFT_01725 | GTP-binding protein LepA                                                                                  | 439.6   | 443.3   | 420.0    | 438.5    | 474.9   | 362.6   | 0.97 | 8.7E-01 |
| B035DRAFT_01726 | Protein of unknown function (DUF2582).                                                                    | 1314.1  | 1311.0  | 1145.7   | 1147.2   | 1000.6  | 803.7   | 0.78 | 2.6E-01 |
| B035DRAFT_01727 | C_GCAxxG_C_C family probable redox protein                                                                | 76.1    | 49.7    | 62.7     | 57.4     | 59.7    | 20.6    | 0.67 | 5.4E-01 |
| B035DRAFT_01728 | Lactate dehydrogenase and related dehydrogenases( EC:1.1.1.29 )                                           | 70.1    | 67.3    | 65.5     | 69.9     | 78.2    | 45.6    | 0.93 | 8.2E-01 |
| B035DRAFT_01729 | ATPase related to the helicase subunit of the Holliday junction resolvase                                 | 47.3    | 39.0    | 32.7     | 27.6     | 43.7    | 21.1    | 0.75 | 5.1E-01 |

|                        |                                                                                          |             |             |             |             |             |             |  |             |                |
|------------------------|------------------------------------------------------------------------------------------|-------------|-------------|-------------|-------------|-------------|-------------|--|-------------|----------------|
| B035DRAFT_01730        | hypothetical protein                                                                     | 121.3       | 121.7       | 132.4       | 167.8       | 168.6       | 160.0       |  | 1.32        | 2.1E-02        |
| B035DRAFT_01731        | phosphate transport system regulatory protein PhoU                                       | 21.2        | 19.8        | 25.5        | 17.4        | 12.4        | 10.4        |  | 0.59        | 1.6E-01        |
| B035DRAFT_01732        | phosphate ABC transporter, ATP-binding protein( EC:3.6.3.27 )                            | 11.4        | 9.4         | 17.5        | 9.0         | 8.3         | 6.3         |  | 0.63        | 2.7E-01        |
| B035DRAFT_01733        | phosphate ABC transporter, permease protein PstA                                         | 14.3        | 11.3        | 13.7        | 8.2         | 7.9         | 5.5         |  | 0.55        | 8.9E-02        |
| B035DRAFT_01734        | phosphate ABC transporter, permease protein PstC                                         | 20.6        | 16.8        | 18.2        | 15.0        | 12.6        | 8.7         |  | 0.64        | 2.0E-01        |
| B035DRAFT_01735        | phosphate binding protein                                                                | 6.8         | 5.5         | 6.3         | 6.3         | 3.6         | 3.6         |  | 0.70        | 3.4E-01        |
| B035DRAFT_01736        | glutaminyI-tRNA synthetase( EC:6.1.1.18 )                                                | 257.6       | 237.9       | 212.8       | 259.4       | 279.2       | 234.5       |  | 1.09        | 5.1E-01        |
| B035DRAFT_01737        | hypothetical protein                                                                     | 147.4       | 160.8       | 149.7       | 165.6       | 189.3       | 189.0       |  | 1.19        | 1.4E-01        |
| B035DRAFT_01738        | Uncharacterized membrane-associated protein                                              | 154.9       | 166.0       | 169.2       | 177.5       | 196.8       | 229.9       |  | 1.23        | 2.1E-01        |
| B035DRAFT_01739        | Peroxiredoxin( EC:1.11.1.15 )                                                            | 2512.7      | 2253.9      | 1883.8      | 2695.6      | 1166.1      | 1618.1      |  | 0.78        | 6.0E-01        |
| B035DRAFT_01740        | hypothetical protein                                                                     | 71.1        | 72.8        | 74.8        | 95.5        | 70.4        | 89.2        |  | 1.16        | 4.0E-01        |
| B035DRAFT_01741        | Predicted P-loop ATPase and inactivated derivatives                                      | 28.7        | 22.9        | 28.0        | 12.3        | 10.4        | 13.0        |  | 0.45        | 2.2E-02        |
| B035DRAFT_01742        | hypothetical protein                                                                     | 777.2       | 870.1       | 927.6       | 896.8       | 643.8       | 779.4       |  | 0.90        | 5.8E-01        |
| B035DRAFT_01743        | hypothetical protein                                                                     | 21.9        | 25.3        | 22.6        | 14.6        | 15.0        | 22.1        |  | 0.73        | 2.6E-01        |
| B035DRAFT_01744        | hypothetical protein                                                                     | 676.9       | 703.9       | 745.7       | 715.8       | 694.6       | 733.7       |  | 1.01        | 8.9E-01        |
| B035DRAFT_01745        | Beta-glucosidase-related glycosidases( EC:3.2.1.21 ) (GH3)                               | 52.5        | 50.8        | 51.4        | 31.2        | 46.4        | 32.6        |  | 0.70        | 1.8E-01        |
| B035DRAFT_01746        | Predicted membrane protein                                                               | 50.4        | 48.8        | 46.4        | 33.2        | 47.2        | 54.8        |  | 0.91        | 7.3E-01        |
| B035DRAFT_01747        | Alcohol dehydrogenase, class IV( EC:1.1.1.1 )                                            | 104.3       | 93.4        | 105.1       | 153.3       | 153.1       | 141.6       |  | 1.48        | 2.1E-02        |
| <b>B035DRAFT_01748</b> | <b>TonB-linked outer membrane protein, SusC/RagA family</b>                              | <b>24.5</b> | <b>16.1</b> | <b>19.3</b> | <b>30.7</b> | <b>45.1</b> | <b>50.8</b> |  | <b>2.10</b> | <b>1.1E-01</b> |
| B035DRAFT_01749        | SusD family                                                                              | 6.5         | 6.6         | 7.6         | 22.3        | 32.0        | 35.3        |  | 4.25        | 1.5E-02        |
| B035DRAFT_01750        | hypothetical protein (CE1)                                                               | 7.5         | 6.8         | 5.9         | 10.1        | 16.1        | 17.4        |  | 2.11        | 9.2E-02        |
| B035DRAFT_01751        | N-acyl-D-glucosamine 2-epimerase( EC:5.1.3.8 ) (GH76)                                    | 112.2       | 113.5       | 128.0       | 400.3       | 454.2       | 463.4       |  | 3.73        | 1.1E-03        |
| B035DRAFT_01752        | Dihydrodipicolinate synthase/N-acetylneuraminate lyase( EC:4.1.3.3 )                     | 91.8        | 92.8        | 93.1        | 332.6       | 378.0       | 362.6       |  | 3.86        | 1.6E-04        |
| B035DRAFT_01753        | uncharacterized protein, YhcH/YjgK/YiaL family                                           | 45.0        | 50.1        | 59.3        | 129.7       | 168.9       | 167.6       |  | 3.02        | 1.7E-02        |
| B035DRAFT_01754        | Sugar phosphate permease                                                                 | 133.6       | 108.2       | 139.9       | 273.3       | 299.6       | 229.2       |  | 2.10        | 3.5E-02        |
| B035DRAFT_01755        | Predicted thioesterase( EC:3.1.2.)                                                       | 161.3       | 177.8       | 152.3       | 146.6       | 163.1       | 134.5       |  | 0.90        | 4.3E-01        |
| B035DRAFT_01756        | OAH/OAS sulfhydrylase( EC:2.5.1.49 )                                                     | 110.1       | 128.8       | 114.4       | 118.3       | 118.5       | 100.1       |  | 0.95        | 7.2E-01        |
| B035DRAFT_01757        | Short-chain dehydrogenases of various substrate specificities                            | 75.2        | 72.4        | 92.7        | 78.0        | 61.3        | 42.6        |  | 0.74        | 3.9E-01        |
| B035DRAFT_01758        | hypothetical protein                                                                     | 17.5        | 18.5        | 17.5        | 13.1        | 12.8        | 12.8        |  | 0.72        | 2.7E-03        |
| B035DRAFT_01759        | hypothetical protein                                                                     | 113.7       | 130.1       | 100.8       | 1021.3      | 1195.8      | 1085.4      |  | 9.62        | 5.2E-04        |
| B035DRAFT_01760        | RNA polymerase sigma factor, sigma-70 family                                             | 114.3       | 118.3       | 103.8       | 954.3       | 1025.3      | 771.8       |  | 8.14        | 8.8E-04        |
| B035DRAFT_01761        | hypothetical protein                                                                     | 78.3        | 71.3        | 60.5        | 635.8       | 667.3       | 589.8       |  | 9.05        | 5.0E-04        |
| B035DRAFT_01762        | hypothetical protein                                                                     | 146.5       | 146.7       | 135.7       | 1292.0      | 1311.8      | 1433.5      |  | 9.41        | 3.2E-05        |
| B035DRAFT_01763        | hypothetical protein                                                                     | 164.9       | 183.7       | 172.9       | 140.6       | 198.9       | 176.9       |  | 0.98        | 9.3E-01        |
| B035DRAFT_01764        | hypothetical protein                                                                     | 104.3       | 88.9        | 107.5       | 131.9       | 103.6       | 52.9        |  | 0.90        | 8.5E-01        |
| B035DRAFT_01765        | Mismatch repair ATPase (MutS family)                                                     | 96.4        | 105.8       | 105.9       | 167.0       | 153.2       | 154.2       |  | 1.54        | 1.3E-02        |
| B035DRAFT_01766        | hypothetical protein                                                                     | 575.3       | 604.0       | 625.8       | 745.2       | 743.0       | 866.8       |  | 1.30        | 7.2E-02        |
| B035DRAFT_01767        | hypothetical protein                                                                     | 631.6       | 694.8       | 667.0       | 768.1       | 780.3       | 687.5       |  | 1.12        | 2.4E-01        |
| B035DRAFT_01768        | ribosomal protein L17                                                                    | 3981.7      | 4374.0      | 4301.2      | 3591.7      | 3593.4      | 4604.4      |  | 0.93        | 6.3E-01        |
| B035DRAFT_01769        | DNA-directed RNA polymerase, alpha subunit, bacterial and chloroplast-type( EC:2.7.7.6 ) | 4789.7      | 5193.6      | 5041.4      | 4097.5      | 4145.8      | 5465.3      |  | 0.90        | 5.7E-01        |
| B035DRAFT_01770        | ribosomal protein S4, bacterial/organelle type                                           | 5009.2      | 5018.0      | 5045.9      | 4235.2      | 4206.7      | 4966.7      |  | 0.89        | 2.6E-01        |
| B035DRAFT_01771        | 30S ribosomal protein S11                                                                | 4289.4      | 4145.3      | 3907.6      | 3307.6      | 3439.9      | 4050.2      |  | 0.87        | 2.9E-01        |
| B035DRAFT_01772        | 30S ribosomal protein S13                                                                | 3918.0      | 3532.5      | 3210.1      | 3148.1      | 3242.6      | 3473.4      |  | 0.93        | 5.2E-01        |
| B035DRAFT_01773        | ribosomal protein L36, bacterial type                                                    | 1895.7      | 1866.3      | 1691.9      | 1547.2      | 1681.8      | 2023.3      |  | 0.96        | 8.0E-01        |
| B035DRAFT_01774        | translation initiation factor IF-1                                                       | 2512.3      | 2435.3      | 2133.4      | 2094.1      | 2195.5      | 2658.3      |  | 0.98        | 9.0E-01        |
| B035DRAFT_01775        | methionine aminopeptidase, type I( EC:3.4.11.18 )                                        | 3731.1      | 3621.4      | 3422.0      | 3167.9      | 3379.4      | 4034.5      |  | 0.98        | 8.8E-01        |
| B035DRAFT_01776        | preprotein translocase, SecY subunit                                                     | 4226.0      | 4609.6      | 4452.6      | 3907.2      | 4171.2      | 5700.4      |  | 1.02        | 9.3E-01        |
| B035DRAFT_01777        | ribosomal protein L15, bacterial/organelle                                               | 5553.7      | 5530.2      | 5097.5      | 4931.8      | 5408.1      | 6436.3      |  | 1.03        | 8.5E-01        |
| B035DRAFT_01778        | ribosomal protein L30, bacterial/organelle                                               | 2943.3      | 2731.3      | 2622.3      | 2568.9      | 2884.3      | 3198.8      |  | 1.04        | 7.7E-01        |
| B035DRAFT_01779        | ribosomal protein S5, bacterial/organelle type                                           | 3865.6      | 3524.6      | 3433.9      | 3162.6      | 3624.6      | 3444.1      |  | 0.94        | 5.6E-01        |

|                 |                                                                                                                |         |         |         |        |         |         |      |         |
|-----------------|----------------------------------------------------------------------------------------------------------------|---------|---------|---------|--------|---------|---------|------|---------|
| B035DRAFT_01780 | ribosomal protein L18, bacterial type                                                                          | 4286.3  | 3873.3  | 3624.2  | 3594.5 | 4060.1  | 4356.5  | 1.02 | 9.0E-01 |
| B035DRAFT_01781 | ribosomal protein L6, bacterial type                                                                           | 3465.6  | 3491.1  | 3136.3  | 2839.6 | 3383.6  | 4008.6  | 1.00 | 9.8E-01 |
| B035DRAFT_01782 | Ribosomal protein S8                                                                                           | 4473.5  | 4479.2  | 3883.7  | 3699.8 | 4400.5  | 5165.1  | 1.03 | 9.0E-01 |
| B035DRAFT_01783 | Ribosomal protein S14                                                                                          | 4567.1  | 4678.7  | 4069.3  | 4292.7 | 4716.8  | 6017.6  | 1.12 | 5.7E-01 |
| B035DRAFT_01784 | Ribosomal protein L5                                                                                           | 2275.6  | 2456.6  | 2411.8  | 1933.1 | 2192.1  | 2801.6  | 0.96 | 8.5E-01 |
| B035DRAFT_01785 | ribosomal protein L24, bacterial/organelle                                                                     | 3840.4  | 3597.0  | 3141.0  | 2882.5 | 3463.3  | 3684.1  | 0.95 | 7.6E-01 |
| B035DRAFT_01786 | ribosomal protein L14, bacterial/organelle                                                                     | 3633.2  | 3606.4  | 3352.3  | 3001.2 | 3451.6  | 3944.6  | 0.98 | 8.8E-01 |
| B035DRAFT_01787 | 30S ribosomal protein S17                                                                                      | 3836.8  | 3661.6  | 3141.5  | 3231.2 | 3627.6  | 4068.9  | 1.03 | 8.8E-01 |
| B035DRAFT_01788 | ribosomal protein L29                                                                                          | 3090.0  | 3061.2  | 2783.9  | 2543.4 | 2902.3  | 3542.8  | 1.00 | 9.9E-01 |
| B035DRAFT_01789 | ribosomal protein L16, bacterial/organelle                                                                     | 3648.4  | 3282.6  | 3155.6  | 3047.6 | 3479.0  | 3452.7  | 0.99 | 9.3E-01 |
| B035DRAFT_01790 | ribosomal protein S3, bacterial type                                                                           | 5009.1  | 4484.7  | 4200.1  | 3974.8 | 4792.1  | 4905.0  | 1.00 | 9.9E-01 |
| B035DRAFT_01791 | ribosomal protein L22, bacterial type                                                                          | 3724.1  | 3385.0  | 3150.8  | 2920.5 | 3572.2  | 3763.0  | 1.00 | 9.8E-01 |
| B035DRAFT_01792 | ribosomal protein S19, bacterial/organelle                                                                     | 3369.7  | 3226.2  | 3067.3  | 2747.7 | 3197.0  | 3652.1  | 0.99 | 9.4E-01 |
| B035DRAFT_01793 | ribosomal protein L2, bacterial/organelle                                                                      | 3542.7  | 3452.4  | 3386.9  | 3078.2 | 3325.2  | 3288.2  | 0.93 | 2.1E-01 |
| B035DRAFT_01794 | Ribosomal protein L23                                                                                          | 4609.1  | 4820.0  | 4254.5  | 3899.3 | 4502.8  | 5410.7  | 1.00 | 9.9E-01 |
| B035DRAFT_01795 | 50S ribosomal protein L4, bacterial/organelle                                                                  | 2531.7  | 2603.5  | 2456.2  | 2238.3 | 2513.5  | 2928.7  | 1.01 | 9.8E-01 |
| B035DRAFT_01796 | 50S ribosomal protein L3, bacterial                                                                            | 3812.8  | 3669.3  | 3449.2  | 3472.2 | 3867.8  | 4259.4  | 1.06 | 6.4E-01 |
| B035DRAFT_01797 | ribosomal protein S10, bacterial/organelle                                                                     | 2482.0  | 2766.4  | 2437.8  | 2253.6 | 2508.6  | 3259.6  | 1.03 | 8.9E-01 |
| B035DRAFT_01798 | translation elongation factor EF-G                                                                             | 4656.1  | 4517.9  | 4418.2  | 3996.0 | 4488.1  | 4980.7  | 0.99 | 9.2E-01 |
| B035DRAFT_01799 | ribosomal protein S7, bacterial/organelle                                                                      | 3872.5  | 4020.7  | 3703.0  | 3172.9 | 3479.9  | 3681.6  | 0.89 | 2.4E-01 |
| B035DRAFT_01800 | ribosomal protein S12, bacterial/organelle                                                                     | 3532.3  | 3597.1  | 3257.6  | 2709.5 | 2765.5  | 2474.5  | 0.77 | 4.6E-02 |
| B035DRAFT_01801 | Protein of unknown function (DUF3467).                                                                         | 908.3   | 1133.4  | 920.2   | 1038.9 | 1068.8  | 1259.6  | 1.14 | 4.4E-01 |
| B035DRAFT_01802 | Signal transduction histidine kinase                                                                           | 146.2   | 163.8   | 138.5   | 143.6  | 171.3   | 164.7   | 1.07 | 6.1E-01 |
| B035DRAFT_01803 | hypothetical protein                                                                                           | 88.7    | 83.5    | 80.5    | 63.7   | 71.5    | 79.3    | 0.85 | 2.3E-01 |
| B035DRAFT_01804 | DNA-directed RNA polymerase, beta" subunit, predominant form( EC:2.7.7.6 )                                     | 1883.9  | 1831.5  | 1924.2  | 1904.8 | 1865.1  | 2027.7  | 1.03 | 6.0E-01 |
| B035DRAFT_01805 | DNA-directed RNA polymerase, beta subunit( EC:2.7.7.6 )                                                        | 1582.5  | 1555.4  | 1590.3  | 1495.0 | 1624.8  | 1790.8  | 1.04 | 7.2E-01 |
| B035DRAFT_01806 | ribosomal protein L7/L12                                                                                       | 6291.7  | 6493.5  | 6622.9  | 5968.9 | 6110.9  | 6727.0  | 0.97 | 6.5E-01 |
| B035DRAFT_01807 | Ribosomal protein L10                                                                                          | 6171.1  | 6700.9  | 6761.9  | 5428.7 | 5874.0  | 7756.0  | 0.96 | 8.5E-01 |
| B035DRAFT_01808 | ribosomal protein L1, bacterial/chloroplast                                                                    | 9610.0  | 9533.0  | 9417.5  | 8095.0 | 9100.9  | 10592.8 | 0.97 | 8.2E-01 |
| B035DRAFT_01809 | 50S ribosomal protein L11                                                                                      | 8588.1  | 8104.4  | 7880.0  | 6834.7 | 7775.0  | 8728.6  | 0.95 | 6.8E-01 |
| B035DRAFT_01810 | transcription termination/antitermination factor NusG                                                          | 10745.5 | 10687.9 | 11614.4 | 9861.3 | 9936.1  | 10435.3 | 0.92 | 1.9E-01 |
| B035DRAFT_01811 | preprotein translocase, SecE subunit, bacterial                                                                | 9276.1  | 9545.3  | 9471.3  | 8232.9 | 8206.0  | 9531.8  | 0.92 | 3.5E-01 |
| B035DRAFT_01812 | ( tRNA )                                                                                                       | 90.0    | 121.4   | 116.3   | 94.8   | 96.7    | 83.8    | 0.85 | 3.8E-01 |
| B035DRAFT_01813 | translation elongation factor TU                                                                               | 11959.9 | 12924.8 | 12065.2 | 8681.9 | 10196.6 | 11471.6 | 0.82 | 2.3E-01 |
| B035DRAFT_01814 | ( tRNA )                                                                                                       | 523.2   | 616.4   | 562.4   | 419.9  | 340.3   | 411.5   | 0.69 | 7.5E-02 |
| B035DRAFT_01815 | ( tRNA )                                                                                                       | 491.7   | 505.7   | 639.2   | 494.5  | 347.2   | 291.3   | 0.68 | 2.6E-01 |
| B035DRAFT_01816 | ( tRNA )                                                                                                       | 535.2   | 673.6   | 951.7   | 652.4  | 402.6   | 355.9   | 0.65 | 3.5E-01 |
| B035DRAFT_01817 | ( tRNA )                                                                                                       | 1759.4  | 2103.9  | 3417.0  | 2090.0 | 1354.3  | 773.6   | 0.56 | 3.7E-01 |
| B035DRAFT_01818 | ribosomal subunit interface protein                                                                            | 1852.5  | 2255.6  | 1782.2  | 1266.7 | 1812.0  | 1947.7  | 0.84 | 5.3E-01 |
| B035DRAFT_01819 | Site-specific recombinase XerD                                                                                 | 5436.2  | 5992.9  | 5773.5  | 4628.5 | 5059.8  | 5422.0  | 0.88 | 2.3E-01 |
| B035DRAFT_01820 | ribosomal protein S21                                                                                          | 2406.3  | 3036.5  | 2882.0  | 2100.6 | 2200.4  | 2422.8  | 0.81 | 2.1E-01 |
| B035DRAFT_01821 | Xaa-Pro aminopeptidase( EC:3.4.11.9 )                                                                          | 117.4   | 125.4   | 115.5   | 110.7  | 114.6   | 125.6   | 0.98 | 8.0E-01 |
| B035DRAFT_01822 | Carbonic anhydrases/acetyltransferases, isoleucine patch superfamily                                           | 127.0   | 150.9   | 124.9   | 120.9  | 115.1   | 121.1   | 0.89 | 3.2E-01 |
| B035DRAFT_01823 | outer membrane autotransporter barrel domain                                                                   | 280.2   | 358.0   | 295.0   | 242.9  | 285.4   | 369.5   | 0.95 | 8.6E-01 |
| B035DRAFT_01824 | Response regulators consisting of a CheY-like receiver domain and a winged-helix DNA-binding domain            | 94.2    | 81.9    | 69.1    | 59.0   | 82.1    | 49.2    | 0.76 | 4.0E-01 |
| B035DRAFT_01825 | His Kinase A (phosphoacceptor) domain./Histidine kinase-, DNA gyrase B-, and HSP90-like ATPase.( EC:2.7.13.3 ) | 54.8    | 59.3    | 47.7    | 47.0   | 58.7    | 57.2    | 1.01 | 9.8E-01 |
| B035DRAFT_01826 | hypothetical protein                                                                                           | 6.3     | 7.7     | 7.2     | 6.0    | 8.6     | 7.3     | 1.02 | 9.3E-01 |
| B035DRAFT_01827 | Beta-galactosidase/beta-glucuronidase( EC:3.2.1.23 ) (GH2)                                                     | 25.1    | 19.1    | 23.7    | 17.1   | 20.7    | 12.1    | 0.72 | 3.3E-01 |

|                 |                                                                                                                                 |       |       |       |       |       |       |      |         |
|-----------------|---------------------------------------------------------------------------------------------------------------------------------|-------|-------|-------|-------|-------|-------|------|---------|
| B035DRAFT_01828 | Predicted unsaturated glucuronyl hydrolase involved in regulation of bacterial surface properties, and related proteins (GH105) | 25.1  | 16.6  | 27.6  | 21.3  | 19.0  | 8.9   | 0.68 | 5.0E-01 |
| B035DRAFT_01829 | Alpha-L-fucosidase( EC:3.2.1.51 ) (GH29)                                                                                        | 33.7  | 22.5  | 31.1  | 21.1  | 24.0  | 11.4  | 0.63 | 3.4E-01 |
| B035DRAFT_01830 | SusD family                                                                                                                     | 18.2  | 17.5  | 17.1  | 11.8  | 13.5  | 14.5  | 0.75 | 8.0E-02 |
| B035DRAFT_01831 | TonB-linked outer membrane protein, SusC/RagA family                                                                            | 27.8  | 26.8  | 29.4  | 16.0  | 17.4  | 19.6  | 0.63 | 3.0E-02 |
| B035DRAFT_01832 | Fe2+-dicitrate sensor, membrane component                                                                                       | 34.8  | 42.4  | 36.3  | 29.3  | 31.0  | 37.2  | 0.86 | 3.8E-01 |
| B035DRAFT_01833 | RNA polymerase sigma-70 factor, Bacteroides expansion family 1                                                                  | 65.3  | 71.9  | 63.2  | 67.4  | 70.7  | 87.4  | 1.12 | 4.8E-01 |
| B035DRAFT_01834 | 3-deoxy-D-manno-octulosonic-acid transferase( EC:2.) (GT30)                                                                     | 318.8 | 348.8 | 337.2 | 336.0 | 368.0 | 390.7 | 1.09 | 3.7E-01 |
| B035DRAFT_01835 | glutamyl-tRNA synthetase, bacterial family( EC:6.1.1.17 )                                                                       | 312.8 | 324.6 | 309.8 | 284.9 | 318.1 | 305.3 | 0.96 | 5.0E-01 |
| B035DRAFT_01836 | uncharacterized domain HDIG                                                                                                     | 60.2  | 66.0  | 66.5  | 84.2  | 91.9  | 109.0 | 1.47 | 7.2E-02 |
| B035DRAFT_01837 | Protein-tyrosine-phosphatase( EC:3.1.3.48 )                                                                                     | 76.1  | 67.9  | 71.1  | 88.2  | 91.4  | 95.7  | 1.28 | 4.3E-02 |
| B035DRAFT_01838 | Histidinol phosphatase and related hydrolases of the PHP family                                                                 | 52.3  | 47.2  | 50.3  | 53.8  | 59.4  | 57.9  | 1.14 | 1.5E-01 |
| B035DRAFT_01839 | primosomal protein N"( EC:3.6.4.)                                                                                               | 48.0  | 49.2  | 47.3  | 51.6  | 55.0  | 48.6  | 1.07 | 3.3E-01 |
| B035DRAFT_01840 | hypothetical protein                                                                                                            | 384.6 | 426.1 | 391.7 | 409.4 | 364.9 | 395.7 | 0.97 | 7.5E-01 |
| B035DRAFT_01841 | hypothetical protein                                                                                                            | 17.6  | 19.8  | 18.6  | 13.6  | 8.0   | 19.2  | 0.69 | 4.2E-01 |
| B035DRAFT_01842 | Predicted transcriptional regulators                                                                                            | 30.1  | 30.4  | 31.8  | 40.1  | 33.8  | 42.5  | 1.25 | 1.5E-01 |
| B035DRAFT_01843 | hypothetical protein                                                                                                            | 41.1  | 55.5  | 45.0  | 41.3  | 37.0  | 59.2  | 0.96 | 9.0E-01 |
| B035DRAFT_01844 | DNA modification methylase( EC:2.1.1.72 )                                                                                       | 96.9  | 115.8 | 103.9 | 104.2 | 104.3 | 126.7 | 1.06 | 7.2E-01 |
| B035DRAFT_01845 | DpnII restriction endonuclease.( EC:3.1.21.4 )                                                                                  | 167.5 | 199.3 | 174.6 | 181.6 | 195.2 | 240.1 | 1.13 | 4.8E-01 |
| B035DRAFT_01846 | DNA adenine methylase (dam)( EC:2.1.1.72 )                                                                                      | 164.7 | 184.5 | 171.4 | 190.8 | 199.7 | 281.0 | 1.27 | 3.2E-01 |
| B035DRAFT_01847 | Protein of unknown function (DUF2795).                                                                                          | 274.7 | 308.7 | 243.5 | 326.8 | 310.4 | 250.3 | 1.07 | 7.3E-01 |
| B035DRAFT_01848 | ATP:cob(I)alamin adenosyltransferase                                                                                            | 190.2 | 164.3 | 167.3 | 132.4 | 141.7 | 125.2 | 0.77 | 7.5E-02 |
| B035DRAFT_01849 | hypothetical protein                                                                                                            | 93.9  | 94.7  | 99.5  | 98.6  | 129.8 | 106.8 | 1.16 | 3.5E-01 |
| B035DRAFT_01850 | PS-10 peptidase S37.                                                                                                            | 13.5  | 16.1  | 16.7  | 16.7  | 18.6  | 24.7  | 1.28 | 3.3E-01 |
| B035DRAFT_01851 | Site-specific recombinase XerD                                                                                                  | 10.9  | 7.2   | 9.1   | 10.1  | 8.9   | 5.3   | 0.87 | 7.6E-01 |
| B035DRAFT_01852 | hypothetical protein                                                                                                            | 15.2  | 14.7  | 13.8  | 15.7  | 12.4  | 7.1   | 0.76 | 5.3E-01 |
| B035DRAFT_01853 | KilA-N domain.                                                                                                                  | 27.7  | 26.9  | 21.5  | 33.2  | 26.0  | 10.5  | 0.83 | 7.8E-01 |
| B035DRAFT_01854 | hypothetical protein                                                                                                            | 16.3  | 11.6  | 9.9   | 9.5   | 13.4  | 6.3   | 0.76 | 5.5E-01 |
| B035DRAFT_01855 | hypothetical protein                                                                                                            | 9.5   | 8.5   | 8.9   | 2.3   | 5.8   | 2.0   | 0.33 | 1.5E-01 |
| B035DRAFT_01856 | hypothetical protein                                                                                                            | 15.8  | 6.2   | 14.7  | 22.9  | 10.2  | 2.7   | 0.76 | 8.4E-01 |
| B035DRAFT_01857 | hypothetical protein                                                                                                            | 4.3   | 7.2   | 5.3   | 3.3   | 4.5   | 4.5   | 0.74 | 3.7E-01 |
| B035DRAFT_01858 | TonB-linked outer membrane protein, SusC/RagA family                                                                            | 363.9 | 365.3 | 339.7 | 201.0 | 279.7 | 263.7 | 0.69 | 1.2E-01 |
| B035DRAFT_01859 | SusD family                                                                                                                     | 472.6 | 432.8 | 378.2 | 196.7 | 353.5 | 324.6 | 0.66 | 2.8E-01 |
| B035DRAFT_01860 | hypothetical protein                                                                                                            | 502.2 | 491.1 | 384.0 | 234.5 | 360.8 | 430.3 | 0.73 | 3.9E-01 |
| B035DRAFT_01861 | Glycoside hydrolase (GH109)                                                                                                     | 429.1 | 423.8 | 360.5 | 161.4 | 266.8 | 262.9 | 0.56 | 1.4E-01 |
| B035DRAFT_01862 | hypothetical protein                                                                                                            | 60.3  | 59.0  | 61.0  | 43.4  | 34.9  | 24.1  | 0.55 | 1.3E-01 |
| B035DRAFT_01863 | hypothetical protein                                                                                                            | 22.7  | 19.5  | 24.4  | 16.5  | 16.2  | 6.4   | 0.54 | 3.2E-01 |
| B035DRAFT_01864 | Protein of unknown function (DUF3408).                                                                                          | 12.4  | 5.8   | 14.7  | 8.8   | 5.8   | 2.4   | 0.49 | 4.1E-01 |
| B035DRAFT_01865 | hypothetical protein                                                                                                            | 8.2   | 6.9   | 13.3  | 4.3   | 4.9   | 2.5   | 0.41 | 1.6E-01 |
| B035DRAFT_01866 | Relaxase/Mobilisation nuclease domain.                                                                                          | 13.2  | 5.5   | 14.3  | 8.5   | 8.6   | 5.8   | 0.74 | 6.2E-01 |
| B035DRAFT_01867 | hypothetical protein                                                                                                            | 29.7  | 15.7  | 31.0  | 24.3  | 18.5  | 12.3  | 0.72 | 5.4E-01 |
| B035DRAFT_01868 | hypothetical protein                                                                                                            | 0.0   | 0.0   | 0.0   | 0.0   | 0.0   | 0.0   | 0.00 |         |
| B035DRAFT_01869 | AraC-type DNA-binding domain-containing proteins                                                                                | 19.7  | 17.6  | 22.2  | 17.8  | 20.9  | 20.3  | 0.99 | 9.8E-01 |
| B035DRAFT_01870 | 3-carboxymuconate cyclase                                                                                                       | 14.9  | 12.1  | 16.3  | 11.1  | 11.0  | 10.5  | 0.76 | 1.6E-01 |
| B035DRAFT_01871 | Uncharacterized homolog of gamma-carboxymuconolactone decarboxylase subunit                                                     | 0.0   | 0.0   | 0.0   | 0.0   | 0.0   | 0.0   | 0.00 |         |
| B035DRAFT_01872 | Predicted membrane protein involved in D-alanine export                                                                         | 25.9  | 28.9  | 22.6  | 15.7  | 25.3  | 25.8  | 0.85 | 6.0E-01 |
| B035DRAFT_01873 | Lysophospholipase L1 and related esterases (CE3)                                                                                | 65.9  | 73.8  | 70.9  | 58.2  | 74.7  | 63.4  | 0.93 | 6.1E-01 |
| B035DRAFT_01874 | hypothetical protein (CE3)                                                                                                      | 121.0 | 117.3 | 123.5 | 124.4 | 122.8 | 88.9  | 0.92 | 6.7E-01 |
| B035DRAFT_01875 | hypothetical protein                                                                                                            | 155.7 | 162.3 | 151.0 | 189.3 | 177.1 | 190.6 | 1.19 | 5.4E-02 |
| B035DRAFT_01876 | Cation/multidrug efflux pump                                                                                                    | 192.7 | 167.3 | 171.5 | 179.5 | 232.1 | 202.0 | 1.15 | 3.8E-01 |



|                 |                                                                                                      |        |        |        |       |        |        |  |      |         |
|-----------------|------------------------------------------------------------------------------------------------------|--------|--------|--------|-------|--------|--------|--|------|---------|
| B035DRAFT_01877 | RND family efflux transporter, MFP subunit                                                           | 148.5  | 128.4  | 126.3  | 131.3 | 192.3  | 152.6  |  | 1.17 | 4.8E-01 |
| B035DRAFT_01878 | Outer membrane protein                                                                               | 131.5  | 141.2  | 122.1  | 134.8 | 178.7  | 155.0  |  | 1.18 | 3.3E-01 |
| B035DRAFT_01879 | Transcriptional regulator                                                                            | 475.4  | 524.2  | 524.1  | 765.2 | 682.0  | 650.1  |  | 1.37 | 5.4E-02 |
| B035DRAFT_01880 | Acyl-[acyl carrier protein]-UDP-N-acetylglucosamine O-acyltransferase( EC:2.3.1.129 )                | 203.0  | 201.7  | 191.1  | 258.6 | 312.0  | 335.0  |  | 1.51 | 6.0E-02 |
| B035DRAFT_01881 | efflux transporter, outer membrane factor (OMF) lipoprotein, NodT family                             | 209.0  | 183.3  | 174.4  | 228.2 | 289.5  | 264.1  |  | 1.38 | 1.2E-01 |
| B035DRAFT_01882 | The (Largely Gram-negative Bacterial) Hydrophobe/Amphiphile Efflux-1 (HAE1) Family                   | 199.0  | 185.3  | 188.6  | 220.7 | 264.4  | 263.4  |  | 1.30 | 8.8E-02 |
| B035DRAFT_01883 | RND family efflux transporter, MFP subunit                                                           | 92.0   | 95.6   | 88.1   | 94.2  | 95.5   | 86.6   |  | 1.00 | 9.8E-01 |
| B035DRAFT_01884 | Malic enzyme( EC:1.1.1.40 )                                                                          | 130.2  | 163.5  | 132.2  | 109.9 | 123.3  | 139.9  |  | 0.88 | 4.7E-01 |
| B035DRAFT_01885 | Glutamate dehydrogenase/leucine dehydrogenase( EC:1.4.1.4 )                                          | 485.1  | 660.7  | 560.0  | 477.7 | 481.3  | 457.3  |  | 0.84 | 3.1E-01 |
| B035DRAFT_01886 | hypothetical protein                                                                                 | 184.2  | 188.2  | 177.5  | 194.1 | 205.3  | 234.9  |  | 1.15 | 2.4E-01 |
| B035DRAFT_01887 | hypothetical protein                                                                                 | 198.1  | 184.5  | 194.4  | 190.4 | 232.7  | 246.0  |  | 1.15 | 3.5E-01 |
| B035DRAFT_01888 | hypothetical protein                                                                                 | 699.4  | 771.7  | 796.5  | 668.3 | 585.5  | 742.8  |  | 0.88 | 3.8E-01 |
| B035DRAFT_01889 | hypothetical protein                                                                                 | 641.2  | 632.7  | 653.7  | 502.6 | 426.4  | 483.6  |  | 0.73 | 4.1E-02 |
| B035DRAFT_01890 | Phosphoenolpyruvate synthase/pyruvate phosphate dikinase                                             | 123.4  | 124.9  | 122.3  | 103.0 | 108.6  | 117.0  |  | 0.89 | 1.4E-01 |
| B035DRAFT_01891 | hypothetical protein                                                                                 | 2.9    | 0.0    | 0.0    | 0.0   | 1.3    | 2.6    |  | 0.64 |         |
| B035DRAFT_01892 | Glutamate dehydrogenase/leucine dehydrogenase( EC:1.4.1.4 )                                          | 486.2  | 449.5  | 519.3  | 609.7 | 574.2  | 523.2  |  | 1.17 | 2.0E-01 |
| B035DRAFT_01893 | hypothetical protein                                                                                 | 95.6   | 139.8  | 119.9  | 108.2 | 132.6  | 159.0  |  | 1.13 | 6.8E-01 |
| B035DRAFT_01894 | Predicted phosphoadenosine phosphosulfate sulfotransferase                                           | 96.9   | 105.0  | 105.8  | 109.5 | 116.0  | 125.7  |  | 1.14 | 1.9E-01 |
| B035DRAFT_01895 | Predicted transcriptional regulators                                                                 | 70.7   | 81.4   | 73.3   | 76.9  | 77.8   | 71.7   |  | 1.00 | 9.6E-01 |
| B035DRAFT_01896 | hypothetical protein                                                                                 | 49.8   | 59.3   | 57.6   | 48.4  | 49.0   | 58.5   |  | 0.93 | 6.5E-01 |
| B035DRAFT_01897 | malate dehydrogenase, NAD-dependent( EC:1.1.1.37 )                                                   | 1221.4 | 1559.4 | 1376.9 | 959.0 | 1144.9 | 1170.6 |  | 0.79 | 2.2E-01 |
| B035DRAFT_01898 | hypothetical protein                                                                                 | 65.4   | 68.2   | 67.3   | 67.2  | 64.4   | 59.3   |  | 0.95 | 4.6E-01 |
| B035DRAFT_01899 | Outer membrane protein                                                                               | 34.3   | 34.0   | 33.3   | 38.7  | 37.6   | 27.7   |  | 1.01 | 9.6E-01 |
| B035DRAFT_01900 | Multidrug resistance efflux pump                                                                     | 45.9   | 41.0   | 39.2   | 53.9  | 48.6   | 26.8   |  | 0.98 | 9.7E-01 |
| B035DRAFT_01901 | hypothetical protein                                                                                 | 22.5   | 22.5   | 24.6   | 29.0  | 27.9   | 32.4   |  | 1.28 | 7.4E-02 |
| B035DRAFT_01902 | ABC-type multidrug transport system, permease component                                              | 17.7   | 17.1   | 23.5   | 20.3  | 21.8   | 17.4   |  | 1.03 | 9.1E-01 |
| B035DRAFT_01903 | Uncharacterized lipoprotein NlpE involved in copper resistance                                       | 74.9   | 73.6   | 61.9   | 67.9  | 58.4   | 71.6   |  | 0.94 | 7.0E-01 |
| B035DRAFT_01904 | ABC-type multidrug transport system, ATPase and permease components                                  | 88.9   | 104.1  | 97.2   | 107.9 | 98.9   | 110.4  |  | 1.09 | 3.9E-01 |
| B035DRAFT_01905 | Predicted transcriptional regulator                                                                  | 25.8   | 30.6   | 32.6   | 34.0  | 28.0   | 44.0   |  | 1.18 | 5.4E-01 |
| B035DRAFT_01906 | TonB family C-terminal domain                                                                        | 44.9   | 41.8   | 46.4   | 43.1  | 45.8   | 52.2   |  | 1.06 | 6.3E-01 |
| B035DRAFT_01907 | anion transporter                                                                                    | 113.2  | 117.0  | 114.5  | 89.7  | 109.4  | 122.2  |  | 0.92 | 6.4E-01 |
| B035DRAFT_01908 | ATPases involved in chromosome partitioning                                                          | 185.5  | 182.5  | 187.8  | 168.0 | 192.6  | 170.3  |  | 0.95 | 5.5E-01 |
| B035DRAFT_01909 | Predicted S-adenosylmethionine-dependent methyltransferase( EC:2.1.1.33 )                            | 119.1  | 131.4  | 125.9  | 116.9 | 120.0  | 102.1  |  | 0.90 | 3.3E-01 |
| B035DRAFT_01910 | branched-chain amino acid aminotransferase, group II( EC:2.6.1.42 )                                  | 369.0  | 402.0  | 379.5  | 369.8 | 357.4  | 381.5  |  | 0.96 | 5.2E-01 |
| B035DRAFT_01911 | Exonuclease VII small subunit( EC:3.1.11.6 )                                                         | 79.0   | 67.4   | 40.9   | 68.1  | 66.3   | 59.6   |  | 1.07 | 8.6E-01 |
| B035DRAFT_01912 | Exonuclease VII, large subunit( EC:3.1.11.6 )                                                        | 110.8  | 95.3   | 110.5  | 89.9  | 91.0   | 51.1   |  | 0.71 | 3.5E-01 |
| B035DRAFT_01913 | Subtilisin-like serine proteases                                                                     | 118.6  | 86.2   | 114.1  | 99.3  | 89.8   | 36.8   |  | 0.65 | 4.8E-01 |
| B035DRAFT_01914 | putative efflux protein, MATE family                                                                 | 42.5   | 45.5   | 41.2   | 44.8  | 44.8   | 46.9   |  | 1.06 | 3.6E-01 |
| B035DRAFT_01915 | hypothetical protein                                                                                 | 80.7   | 81.2   | 89.2   | 108.5 | 118.7  | 114.4  |  | 1.36 | 2.7E-02 |
| B035DRAFT_01916 | polyphosphate kinase 1( EC:2.7.4.1 )                                                                 | 40.0   | 39.7   | 41.5   | 36.0  | 43.9   | 37.4   |  | 0.96 | 7.6E-01 |
| B035DRAFT_01917 | Predicted phosphoesterase                                                                            | 35.0   | 31.1   | 30.9   | 40.5  | 31.1   | 24.3   |  | 0.97 | 9.2E-01 |
| B035DRAFT_01918 | dTDP-glucose 4,6-dehydratase( EC:4.2.1.46 )                                                          | 124.5  | 124.9  | 115.2  | 126.8 | 127.6  | 120.0  |  | 1.03 | 6.5E-01 |
| B035DRAFT_01919 | ATPase components of ABC transporters with duplicated ATPase domains                                 | 218.1  | 233.0  | 218.9  | 170.8 | 197.3  | 142.1  |  | 0.75 | 1.7E-01 |
| B035DRAFT_01920 | Predicted permease                                                                                   | 432.7  | 436.4  | 450.0  | 343.4 | 361.1  | 327.5  |  | 0.78 | 2.3E-02 |
| B035DRAFT_01921 | methylmalonyl-CoA mutase, heterodimeric type, beta chain( EC:5.4.99.2 )                              | 234.3  | 237.2  | 240.1  | 293.5 | 305.8  | 312.4  |  | 1.28 | 6.7E-03 |
| B035DRAFT_01922 | methylmalonyl-CoA mutase C-terminal domain/methylmalonyl-CoA mutase N-terminal domain( EC:5.4.99.2 ) | 379.3  | 338.3  | 349.1  | 388.1 | 426.0  | 394.6  |  | 1.13 | 1.8E-01 |
| B035DRAFT_01923 | hypothetical protein                                                                                 | 24.2   | 33.9   | 30.8   | 35.7  | 35.9   | 42.4   |  | 1.29 | 2.6E-01 |

|                 |                                                                                                                 |        |        |        |        |        |        |      |         |
|-----------------|-----------------------------------------------------------------------------------------------------------------|--------|--------|--------|--------|--------|--------|------|---------|
| B035DRAFT_01924 | Protein of unknown function (DUF2874).                                                                          | 52.6   | 70.9   | 56.2   | 72.2   | 57.6   | 63.4   | 1.08 | 7.1E-01 |
| B035DRAFT_01925 | DNA topoisomerase III, bacteria and conjugative plasmid( EC:5.99.1.2 )                                          | 155.1  | 140.1  | 150.8  | 212.9  | 201.9  | 180.8  | 1.33 | 6.2E-02 |
| B035DRAFT_01926 | tRNA and rRNA cytosine-C5-methylases                                                                            | 90.4   | 86.7   | 83.3   | 95.7   | 91.6   | 59.8   | 0.93 | 8.0E-01 |
| B035DRAFT_01927 | Predicted phosphohydrolases                                                                                     | 6.6    | 6.1    | 5.5    | 5.1    | 7.7    | 5.5    | 1.00 | 9.9E-01 |
| B035DRAFT_01928 | TonB-dependent receptor                                                                                         | 7.5    | 6.2    | 5.5    | 4.4    | 5.3    | 4.4    | 0.74 | 1.9E-01 |
| B035DRAFT_01929 | hypothetical protein                                                                                            | 52.3   | 50.8   | 48.6   | 63.5   | 57.6   | 50.2   | 1.12 | 3.8E-01 |
| B035DRAFT_01930 | RNA polymerase sigma factor, sigma-70 family                                                                    | 34.0   | 37.4   | 40.3   | 40.1   | 38.1   | 29.8   | 0.96 | 8.5E-01 |
| B035DRAFT_01931 | hypothetical protein                                                                                            | 40.8   | 56.4   | 42.7   | 41.3   | 40.3   | 51.6   | 0.96 | 8.6E-01 |
| B035DRAFT_01932 | thymidylate synthase( EC:2.1.1.45 )                                                                             | 107.5  | 99.3   | 99.0   | 106.7  | 88.2   | 88.1   | 0.92 | 5.1E-01 |
| B035DRAFT_01933 | Dihydrofolate reductase( EC:1.5.1.3 )                                                                           | 119.4  | 133.3  | 132.1  | 103.1  | 95.6   | 112.0  | 0.81 | 1.1E-01 |
| B035DRAFT_01934 | Transcriptional regulators                                                                                      | 538.3  | 648.0  | 637.8  | 476.1  | 382.0  | 457.7  | 0.72 | 1.2E-01 |
| B035DRAFT_01935 | IgA Peptidase M64.                                                                                              | 49.1   | 57.2   | 51.7   | 39.0   | 43.9   | 45.8   | 0.81 | 1.5E-01 |
| B035DRAFT_01936 | Acetyltransferases                                                                                              | 150.4  | 174.8  | 158.9  | 145.4  | 124.3  | 126.1  | 0.82 | 1.6E-01 |
| B035DRAFT_01937 | Biopolymer transport protein                                                                                    | 4772.4 | 5554.8 | 5199.9 | 4463.6 | 5075.9 | 6690.3 | 1.03 | 9.0E-01 |
| B035DRAFT_01938 | Biopolymer transport protein                                                                                    | 4212.8 | 4582.5 | 4395.2 | 3752.1 | 4191.4 | 5385.8 | 1.00 | 1.0E+00 |
| B035DRAFT_01939 | hypothetical protein                                                                                            | 3320.7 | 3724.9 | 3700.4 | 2897.9 | 3401.2 | 4388.9 | 0.98 | 9.4E-01 |
| B035DRAFT_01940 | Biopolymer transport proteins                                                                                   | 3726.5 | 3960.6 | 3704.8 | 2891.0 | 3487.5 | 3840.1 | 0.89 | 4.6E-01 |
| B035DRAFT_01941 | ( tRNA )                                                                                                        | 99.8   | 111.6  | 102.8  | 169.7  | 146.2  | 146.5  | 1.47 | 3.8E-02 |
| B035DRAFT_01942 | hydrolase, TatD family( EC:3.1.21.)                                                                             | 166.1  | 156.3  | 159.3  | 174.4  | 193.1  | 149.6  | 1.07 | 6.4E-01 |
| B035DRAFT_01943 | Geranylgeranyl pyrophosphate synthase( EC:2.5.1.29,EC:2.5.1.1,EC:2.5.1.10 )                                     | 226.8  | 205.6  | 225.9  | 209.1  | 251.8  | 181.2  | 0.97 | 8.7E-01 |
| B035DRAFT_01944 | TonB family C-terminal domain                                                                                   | 1791.5 | 1909.7 | 1585.8 | 1891.3 | 1906.5 | 1757.4 | 1.05 | 6.4E-01 |
| B035DRAFT_01945 | cytidylate kinase( EC:2.7.4.14 )                                                                                | 167.5  | 143.4  | 174.0  | 285.8  | 222.1  | 95.9   | 1.13 | 8.5E-01 |
| B035DRAFT_01946 | (E)-4-hydroxy-3-methyl-but-2-enyl pyrophosphate reductase (IPP and DMAPP forming)( EC:1.1.17.1.2 )              | 117.0  | 107.3  | 107.7  | 153.6  | 156.3  | 114.7  | 1.27 | 2.5E-01 |
| B035DRAFT_01947 | 6-phosphofructokinase( EC:2.7.1.11 )                                                                            | 316.2  | 328.3  | 313.5  | 389.5  | 352.9  | 271.4  | 1.05 | 8.3E-01 |
| B035DRAFT_01948 | hypothetical protein                                                                                            | 46.2   | 48.9   | 41.1   | 61.1   | 53.7   | 53.3   | 1.24 | 1.5E-01 |
| B035DRAFT_01949 | Alpha-N-acetylglucosaminidase (NAGLU).( EC:3.2.1.50 ) (GH89)                                                    | 41.0   | 45.7   | 42.9   | 53.5   | 62.6   | 75.4   | 1.47 | 1.1E-01 |
| B035DRAFT_01950 | LAO/AO transport system ATPase( EC:2.7.)                                                                        | 496.2  | 446.7  | 535.4  | 652.8  | 542.4  | 258.4  | 0.92 | 8.8E-01 |
| B035DRAFT_01951 | Protein of unknown function (DUF1573).                                                                          | 363.1  | 316.2  | 337.9  | 459.0  | 421.9  | 357.0  | 1.21 | 2.5E-01 |
| B035DRAFT_01952 | hypothetical protein                                                                                            | 158.4  | 171.9  | 159.4  | 203.1  | 167.1  | 153.2  | 1.06 | 7.1E-01 |
| B035DRAFT_01953 | Large extracellular alpha-helical protein                                                                       | 126.7  | 105.1  | 116.7  | 102.5  | 109.9  | 69.6   | 0.80 | 4.1E-01 |
| B035DRAFT_01954 | HipA-like C-terminal domain./HipA-like N-terminal domain.                                                       | 58.3   | 60.2   | 63.7   | 61.5   | 68.2   | 57.2   | 1.02 | 8.3E-01 |
| B035DRAFT_01955 | HipA N-terminal domain                                                                                          | 72.5   | 83.6   | 78.7   | 64.8   | 92.6   | 82.0   | 1.01 | 9.7E-01 |
| B035DRAFT_01956 | transcriptional regulator, y4mF family                                                                          | 71.9   | 69.1   | 49.5   | 70.0   | 61.7   | 46.9   | 0.94 | 8.5E-01 |
| B035DRAFT_01957 | Xaa-His dipeptidase( EC:3.4.13.)                                                                                | 854.3  | 849.3  | 807.3  | 943.9  | 1035.7 | 926.4  | 1.16 | 1.1E-01 |
| B035DRAFT_01958 | conserved hypothetical protein                                                                                  | 45.7   | 40.8   | 38.2   | 45.5   | 45.6   | 43.2   | 1.08 | 4.5E-01 |
| B035DRAFT_01959 | dimethyladenosine transferase( EC:2.1.1.182 )                                                                   | 154.5  | 161.8  | 161.8  | 187.9  | 191.7  | 175.8  | 1.16 | 6.5E-02 |
| B035DRAFT_01960 | Mg2+ transporter (mgtE)                                                                                         | 130.9  | 126.7  | 123.7  | 146.4  | 146.3  | 129.5  | 1.11 | 2.5E-01 |
| B035DRAFT_01961 | Domain of Unknown Function (DUF349).                                                                            | 479.9  | 540.7  | 481.9  | 570.8  | 639.0  | 773.6  | 1.31 | 1.8E-01 |
| B035DRAFT_01962 | Response regulators consisting of a CheY-like receiver domain and a winged-helix DNA-binding domain             | 62.2   | 71.1   | 58.1   | 39.0   | 47.1   | 56.6   | 0.74 | 2.2E-01 |
| B035DRAFT_01963 | hypothetical protein                                                                                            | 51.0   | 50.6   | 48.4   | 52.4   | 64.0   | 53.5   | 1.13 | 3.2E-01 |
| B035DRAFT_01964 | 5,10-methylene-tetrahydrofolate dehydrogenase/Methenyl tetrahydrofolate cyclohydrolase( EC:1.5.1.5,EC:3.5.4.9 ) | 247.3  | 239.3  | 262.0  | 332.9  | 335.9  | 229.8  | 1.18 | 4.7E-01 |
| B035DRAFT_01965 | signal recognition particle protein                                                                             | 612.0  | 608.4  | 598.5  | 603.1  | 631.1  | 478.7  | 0.94 | 6.7E-01 |
| B035DRAFT_01966 | putative efflux protein, MATE family                                                                            | 70.7   | 72.9   | 74.6   | 86.6   | 87.5   | 94.2   | 1.23 | 3.5E-02 |
| B035DRAFT_01967 | Long-chain fatty acid transport protein                                                                         | 770.9  | 904.6  | 786.1  | 516.9  | 650.9  | 680.5  | 0.75 | 1.7E-01 |
| B035DRAFT_01968 | Protein of unknown function (DUF1812).                                                                          | 188.4  | 202.0  | 246.8  | 205.7  | 231.4  | 229.4  | 1.05 | 7.7E-01 |
| B035DRAFT_01969 | hypothetical protein                                                                                            | 339.8  | 387.1  | 440.8  | 449.2  | 483.4  | 554.7  | 1.28 | 2.2E-01 |
| B035DRAFT_01970 | 3-phosphoglycerate kinase( EC:2.7.2.3 )                                                                         | 1317.4 | 1437.7 | 1267.3 | 1262.7 | 1484.6 | 1757.6 | 1.11 | 5.7E-01 |

|                 |                                                                                                                  |        |        |        |        |        |        |      |         |
|-----------------|------------------------------------------------------------------------------------------------------------------|--------|--------|--------|--------|--------|--------|------|---------|
| B035DRAFT_01971 | hypothetical protein                                                                                             | 852.4  | 1022.8 | 926.1  | 1040.9 | 1035.6 | 1111.8 | 1.14 | 2.5E-01 |
| B035DRAFT_01972 | hypothetical protein                                                                                             | 177.5  | 174.7  | 178.8  | 163.5  | 151.0  | 175.6  | 0.92 | 3.3E-01 |
| B035DRAFT_01973 | hypothetical protein                                                                                             | 117.1  | 132.0  | 116.8  | 100.6  | 111.9  | 119.9  | 0.91 | 4.2E-01 |
| B035DRAFT_01974 | Glycoside hydrolase (GH123)                                                                                      | 404.0  | 397.0  | 387.4  | 447.4  | 525.0  | 647.4  | 1.35 | 1.8E-01 |
| B035DRAFT_01975 | hypothetical protein                                                                                             | 45.9   | 54.4   | 49.6   | 65.4   | 77.1   | 100.0  | 1.60 | 1.2E-01 |
| B035DRAFT_01976 | Periplasmic component of the Tol biopolymer transport system                                                     | 59.8   | 57.9   | 58.4   | 71.8   | 82.8   | 88.0   | 1.37 | 6.0E-02 |
| B035DRAFT_01977 | Beta-galactosidase( EC:3.2.1.23 ) (GH35)                                                                         | 17.8   | 15.6   | 17.1   | 11.9   | 15.3   | 14.9   | 0.83 | 2.8E-01 |
| B035DRAFT_01978 | Beta-galactosidase/beta-glucuronidase (GH2)                                                                      | 15.7   | 14.1   | 17.3   | 13.4   | 15.2   | 11.9   | 0.86 | 3.8E-01 |
| B035DRAFT_01979 | Beta-galactosidase/beta-glucuronidase (GH2)                                                                      | 15.6   | 13.2   | 15.0   | 13.8   | 14.8   | 14.9   | 1.00 | 9.7E-01 |
| B035DRAFT_01980 | transporter, SSS family                                                                                          | 16.8   | 13.3   | 17.5   | 10.4   | 14.9   | 11.6   | 0.77 | 3.2E-01 |
| B035DRAFT_01981 | Gluconolactonase                                                                                                 | 17.1   | 19.5   | 17.8   | 19.2   | 17.2   | 13.7   | 0.91 | 6.4E-01 |
| B035DRAFT_01982 | Dehydrogenases with different specificities (related to short-chain alcohol dehydrogenases)                      | 18.3   | 7.9    | 16.6   | 11.7   | 13.5   | 7.6    | 0.79 | 6.8E-01 |
| B035DRAFT_01983 | L-alanine-DL-glutamate epimerase and related enzymes of enolase superfamily( EC:4.2.1.6 )                        | 21.1   | 17.5   | 15.8   | 14.7   | 18.3   | 11.3   | 0.81 | 4.7E-01 |
| B035DRAFT_01984 | Demethylmenaquinone methyltransferase                                                                            | 25.8   | 25.2   | 25.8   | 19.5   | 21.9   | 22.4   | 0.83 | 8.2E-02 |
| B035DRAFT_01985 | AraC-type DNA-binding domain-containing proteins                                                                 | 54.2   | 55.1   | 57.0   | 48.3   | 47.0   | 48.4   | 0.86 | 2.1E-02 |
| B035DRAFT_01986 | Glycoside hydrolase (GH95)                                                                                       | 44.1   | 41.3   | 45.3   | 39.9   | 44.2   | 33.6   | 0.90 | 4.7E-01 |
| B035DRAFT_01987 | TonB-linked outer membrane protein, SusC/RagA family                                                             | 5.4    | 4.9    | 5.1    | 3.3    | 4.4    | 5.0    | 0.81 | 3.7E-01 |
| B035DRAFT_01988 | SusD family                                                                                                      | 15.7   | 16.5   | 16.1   | 15.9   | 16.7   | 17.2   | 1.03 | 5.1E-01 |
| B035DRAFT_01989 | Bifunctional PLP-dependent enzyme with beta-cystathionase and maltose regulon repressor activities( EC:4.4.1.8 ) | 163.9  | 140.9  | 152.4  | 151.8  | 176.6  | 153.0  | 1.05 | 6.7E-01 |
| B035DRAFT_01990 | Transcriptional regulator containing an amidase domain and an AraC-type DNA-binding HTH domain( EC:3.2.)         | 84.8   | 69.2   | 87.2   | 80.8   | 86.4   | 79.4   | 1.03 | 8.6E-01 |
| B035DRAFT_01991 | Predicted transcriptional regulators                                                                             | 60.0   | 62.3   | 51.8   | 68.0   | 81.8   | 87.0   | 1.36 | 1.4E-01 |
| B035DRAFT_01992 | hypothetical protein                                                                                             | 65.5   | 46.1   | 76.2   | 102.8  | 82.3   | 58.0   | 1.29 | 5.3E-01 |
| B035DRAFT_01993 | hypothetical protein                                                                                             | 36.0   | 60.1   | 45.4   | 51.7   | 30.9   | 41.1   | 0.87 | 7.3E-01 |
| B035DRAFT_01994 | Prephenate dehydratase( EC:4.2.1.51 )                                                                            | 150.3  | 146.7  | 130.7  | 136.5  | 140.8  | 126.9  | 0.95 | 5.6E-01 |
| B035DRAFT_01995 | Aspartate/tyrosine/aromatic aminotransferase                                                                     | 179.5  | 175.5  | 168.8  | 177.8  | 182.3  | 149.2  | 0.97 | 8.0E-01 |
| B035DRAFT_01996 | 3-deoxy-D-arabino-heptulosonate 7-phosphate (DAHP) synthase( EC:5.4.99.5 )                                       | 256.7  | 239.2  | 215.4  | 246.1  | 242.3  | 220.5  | 1.00 | 9.9E-01 |
| B035DRAFT_01997 | Prephenate dehydrogenase( EC:5.4.99.5 )                                                                          | 314.7  | 339.2  | 318.7  | 307.9  | 321.7  | 398.3  | 1.05 | 7.5E-01 |
| B035DRAFT_01998 | hypothetical protein                                                                                             | 84.6   | 86.1   | 89.0   | 94.2   | 112.4  | 85.2   | 1.12 | 4.6E-01 |
| B035DRAFT_01999 | Protein of unknown function(DUF2089).                                                                            | 56.3   | 50.1   | 51.0   | 63.1   | 65.7   | 33.8   | 0.99 | 9.8E-01 |
| B035DRAFT_02000 | Lysophospholipase                                                                                                | 55.1   | 46.5   | 59.0   | 80.9   | 78.6   | 37.4   | 1.16 | 7.6E-01 |
| B035DRAFT_02001 | Fucose 4-O-acetylase and related acetyltransferases                                                              | 21.9   | 27.9   | 27.2   | 36.8   | 35.9   | 36.4   | 1.43 | 7.6E-02 |
| B035DRAFT_02003 | MAC/Perforin domain.                                                                                             | 1267.3 | 1444.1 | 1252.0 | 1248.8 | 1283.4 | 1783.4 | 1.08 | 7.5E-01 |
| B035DRAFT_02004 | Outer membrane receptor for ferrienterochelin and colicins                                                       | 336.7  | 425.4  | 389.1  | 406.4  | 436.5  | 570.8  | 1.22 | 3.8E-01 |
| B035DRAFT_02005 | hypothetical protein                                                                                             | 814.2  | 887.7  | 828.2  | 922.7  | 924.5  | 1235.4 | 1.21 | 3.2E-01 |
| B035DRAFT_02006 | hypothetical protein                                                                                             | 411.8  | 423.2  | 382.7  | 442.2  | 441.1  | 517.8  | 1.15 | 2.5E-01 |
| B035DRAFT_02007 | ABC-type Fe3+-hydroxamate transport system, periplasmic component                                                | 294.7  | 295.4  | 310.0  | 322.1  | 338.2  | 275.2  | 1.04 | 7.7E-01 |
| B035DRAFT_02008 | ABC-type cobalamin transport system, permease component                                                          | 226.7  | 238.2  | 269.5  | 291.2  | 247.3  | 228.4  | 1.04 | 8.1E-01 |
| B035DRAFT_02009 | ABC-type cobalamin/Fe3+-siderophores transport systems, ATPase components( EC:3.6.3.34 )                         | 116.3  | 119.2  | 126.2  | 126.0  | 135.8  | 99.3   | 0.99 | 9.6E-01 |
| B035DRAFT_02010 | threonine synthase( EC:4.2.3.1 )                                                                                 | 324.7  | 363.0  | 319.9  | 220.8  | 270.3  | 227.5  | 0.71 | 7.5E-02 |
| B035DRAFT_02011 | proposed homoserine kinase( EC:5.4.2.1 )                                                                         | 550.3  | 491.7  | 592.4  | 406.1  | 352.6  | 164.4  | 0.53 | 2.6E-01 |
| B035DRAFT_02012 | aspartate kinase( EC:2.7.2.4,EC:1.1.1.3 )                                                                        | 511.1  | 506.4  | 468.5  | 326.3  | 385.9  | 295.1  | 0.67 | 7.0E-02 |
| B035DRAFT_02013 | hypothetical protein                                                                                             | 58.1   | 55.2   | 54.5   | 68.0   | 72.6   | 79.6   | 1.31 | 5.4E-02 |
| B035DRAFT_02014 | Alpha-N-acetylglucosaminidase (NAGLU).( EC:3.2.1.50 ) (GH89)                                                     | 39.8   | 38.8   | 36.5   | 43.4   | 47.2   | 35.2   | 1.09 | 6.1E-01 |
| B035DRAFT_02015 | DNA repair protein RadA                                                                                          | 84.8   | 78.5   | 95.9   | 89.5   | 83.1   | 43.4   | 0.80 | 6.0E-01 |
| B035DRAFT_02016 | Uncharacterized metal-binding protein conserved in archaea                                                       | 52.1   | 53.6   | 52.0   | 43.1   | 63.8   | 51.9   | 0.99 | 9.8E-01 |

|                 |                                                                                                           |        |        |        |        |        |        |      |         |
|-----------------|-----------------------------------------------------------------------------------------------------------|--------|--------|--------|--------|--------|--------|------|---------|
| B035DRAFT_02017 | Uncharacterized FAD-dependent dehydrogenases                                                              | 88.7   | 82.7   | 85.6   | 92.1   | 93.1   | 63.2   | 0.95 | 8.5E-01 |
| B035DRAFT_02018 | Response regulator containing a CheY-like receiver domain and an HTH DNA-binding domain                   | 29.5   | 36.9   | 30.2   | 24.4   | 27.3   | 27.3   | 0.82 | 2.2E-01 |
| B035DRAFT_02019 | Outer membrane receptor proteins, mostly Fe transport                                                     | 680.0  | 902.9  | 730.8  | 817.9  | 892.6  | 885.5  | 1.13 | 4.5E-01 |
| B035DRAFT_02020 | hypothetical protein                                                                                      | 140.0  | 154.2  | 140.9  | 137.8  | 160.9  | 184.7  | 1.10 | 5.4E-01 |
| B035DRAFT_02021 | Collagenase and related proteases( EC:3.4.)                                                               | 190.9  | 178.5  | 180.1  | 189.6  | 201.1  | 133.2  | 0.94 | 8.0E-01 |
| B035DRAFT_02022 | homoserine O-succinyltransferase( EC:2.3.1.46 )                                                           | 152.5  | 157.0  | 151.6  | 165.2  | 176.1  | 161.0  | 1.09 | 1.7E-01 |
| B035DRAFT_02023 | His Kinase A (phosphoacceptor) domain./PAS fold./Histidine kinase-, DNA gyrase B-, and HSP90-like ATPase. | 34.4   | 35.3   | 36.4   | 44.3   | 58.2   | 59.2   | 1.51 | 8.2E-02 |
| B035DRAFT_02024 | DNA-binding protein, histone-like, putative                                                               | 175.2  | 160.5  | 166.7  | 277.0  | 239.8  | 155.0  | 1.30 | 4.2E-01 |
| B035DRAFT_02025 | Nitroreductase                                                                                            | 129.8  | 122.6  | 130.8  | 173.7  | 186.7  | 166.4  | 1.37 | 2.3E-02 |
| B035DRAFT_02026 | Outer membrane protein                                                                                    | 108.0  | 87.3   | 100.3  | 144.5  | 168.3  | 123.9  | 1.47 | 1.2E-01 |
| B035DRAFT_02027 | heavy metal efflux pump (cobalt-zinc-cadmium)                                                             | 82.7   | 75.5   | 87.2   | 122.3  | 141.2  | 127.2  | 1.59 | 2.5E-02 |
| B035DRAFT_02028 | RND family efflux transporter, MFP subunit                                                                | 99.9   | 84.6   | 82.2   | 129.6  | 147.9  | 99.4   | 1.40 | 2.1E-01 |
| B035DRAFT_02029 | hypothetical protein                                                                                      | 127.5  | 161.8  | 145.8  | 152.0  | 140.7  | 142.9  | 1.01 | 9.7E-01 |
| B035DRAFT_02030 | Predicted metalloendopeptidase( EC:3.4.24.)                                                               | 177.7  | 164.7  | 173.4  | 134.9  | 156.6  | 119.0  | 0.79 | 1.8E-01 |
| B035DRAFT_02031 | ATPase components of ABC transporters with duplicated ATPase domains                                      | 138.3  | 132.9  | 131.5  | 103.0  | 115.5  | 114.9  | 0.83 | 7.0E-02 |
| B035DRAFT_02032 | adenylosuccinate synthase( EC:6.3.4.4 )                                                                   | 538.2  | 556.7  | 542.6  | 512.4  | 530.3  | 524.3  | 0.96 | 1.6E-01 |
| B035DRAFT_02033 | Fe2+/Zn2+ uptake regulation proteins                                                                      | 255.7  | 325.4  | 304.3  | 294.3  | 278.1  | 289.2  | 0.98 | 8.8E-01 |
| B035DRAFT_02034 | Predicted DNA alkylation repair enzyme                                                                    | 145.4  | 155.0  | 156.1  | 145.9  | 140.1  | 149.2  | 0.95 | 3.8E-01 |
| B035DRAFT_02035 | Peptidase family M49.( EC:3.4.14.4 )                                                                      | 170.7  | 155.3  | 150.3  | 135.3  | 145.7  | 140.4  | 0.89 | 1.8E-01 |
| B035DRAFT_02036 | Response regulator containing CheY-like receiver domain and AraC-type DNA-binding domain                  | 1653.3 | 2241.1 | 1965.4 | 2276.2 | 2043.7 | 2724.8 | 1.20 | 4.1E-01 |
| B035DRAFT_02037 | ATP-dependent DNA helicase RecQ( EC:3.6.4.12 )                                                            | 44.6   | 55.2   | 46.1   | 55.0   | 52.8   | 65.6   | 1.19 | 3.3E-01 |
| B035DRAFT_02038 | Tetratricopeptide repeat.                                                                                 | 88.0   | 99.1   | 93.5   | 121.6  | 135.1  | 142.5  | 1.42 | 4.3E-02 |
| B035DRAFT_02039 | 3-isopropylmalate dehydrogenase( EC:1.1.1.85 )                                                            | 157.5  | 172.3  | 145.9  | 128.9  | 157.7  | 158.6  | 0.93 | 6.5E-01 |
| B035DRAFT_02040 | Isopropylmalate/homocitrate/citramalate synthases( EC:2.3.1.182 )                                         | 98.2   | 105.1  | 89.4   | 84.6   | 96.7   | 100.5  | 0.96 | 7.7E-01 |
| B035DRAFT_02041 | 3-isopropylmalate dehydratase, small subunit( EC:4.2.1.33,EC:4.2.1.35 )                                   | 112.9  | 133.2  | 90.2   | 99.8   | 112.9  | 121.4  | 1.00 | 9.9E-01 |
| B035DRAFT_02042 | hypothetical protein                                                                                      | 49.5   | 56.4   | 35.4   | 39.9   | 39.6   | 65.3   | 1.01 | 9.8E-01 |
| B035DRAFT_02043 | 3-isopropylmalate dehydratase, large subunit( EC:4.2.1.33,EC:4.2.1.35 )                                   | 103.9  | 106.5  | 100.9  | 80.2   | 102.3  | 97.7   | 0.90 | 4.3E-01 |
| B035DRAFT_02044 | 2-isopropylmalate synthase, bacterial type( EC:2.3.3.13 )                                                 | 139.8  | 166.2  | 170.1  | 84.2   | 90.4   | 106.9  | 0.59 | 5.0E-02 |
| B035DRAFT_02045 | ( rRNA )                                                                                                  | 6.5    | 11.9   | 7.7    | 4.1    | 7.9    | 9.3    |      | 6.8E-01 |
| B035DRAFT_02046 | Transcriptional regulators                                                                                | 43.7   | 42.7   | 43.9   | 43.3   | 45.4   | 42.6   | 1.01 | 8.7E-01 |
| B035DRAFT_02047 | Predicted oxidoreductases (related to aryl-alcohol dehydrogenases)                                        | 1.4    | 2.5    | 3.1    | 1.5    | 3.1    | 3.8    | 1.17 | 8.2E-01 |
| B035DRAFT_02048 | Glycoside hydrolase (GH32)                                                                                | 8.4    | 6.4    | 7.3    | 9.1    | 7.3    | 8.7    | 1.13 | 5.1E-01 |
| B035DRAFT_02049 | hypothetical protein                                                                                      | 8.7    | 6.0    | 7.0    | 7.2    | 6.6    | 6.1    | 0.92 | 7.2E-01 |
| B035DRAFT_02050 | hypothetical protein                                                                                      | 5.7    | 5.1    | 5.8    | 4.3    | 5.4    | 3.7    | 0.80 | 3.2E-01 |
| B035DRAFT_02051 | FOG: FHA domain                                                                                           | 4.1    | 3.1    | 4.0    | 2.6    | 3.7    | 3.4    | 0.85 | 5.3E-01 |
| B035DRAFT_02052 | FOG: FHA domain                                                                                           | 1.4    | 1.7    | 1.7    | 2.4    | 1.6    | 1.3    | 1.06 | 8.9E-01 |
| B035DRAFT_02053 | Serine/threonine protein phosphatase                                                                      | 0.9    | 1.1    | 0.6    | 0.8    | 0.6    | 0.4    | 0.69 | 4.1E-01 |
| B035DRAFT_02054 | Protein kinase domain.( EC:2.7.11.1 )                                                                     | 2.1    | 2.4    | 1.7    | 3.7    | 1.6    | 3.0    | 1.26 | 6.4E-01 |
| B035DRAFT_02055 | Serine/threonine protein kinase                                                                           | 1.3    | 1.7    | 1.4    | 1.0    | 1.4    | 0.8    | 0.72 | 3.5E-01 |
| B035DRAFT_02056 | FOG: FHA domain                                                                                           | 1.7    | 2.0    | 1.8    | 0.3    | 2.0    | 2.2    | 0.57 | 6.6E-01 |
| B035DRAFT_02057 | Uncharacterized conserved protein                                                                         | 43.7   | 54.1   | 51.0   | 56.3   | 48.1   | 59.2   | 1.10 | 5.5E-01 |
| B035DRAFT_02058 | Histidine kinase-, DNA gyrase B-, and HSP90-like ATPase.                                                  | 226.9  | 212.1  | 196.1  | 176.6  | 171.2  | 199.9  | 0.86 | 2.4E-01 |
| B035DRAFT_02059 | Small-conductance mechanosensitive channel                                                                | 94.9   | 92.9   | 97.6   | 82.5   | 80.2   | 86.0   | 0.87 | 5.2E-02 |
| B035DRAFT_02060 | The (Largely Gram-negative Bacterial) Hydrophobe/Amphiphile Efflux-1 (HAE1) Family                        | 412.9  | 267.6  | 425.6  | 268.1  | 235.7  | 128.4  | 0.56 | 2.7E-01 |
| B035DRAFT_02061 | RND family efflux transporter, MFP subunit                                                                | 197.7  | 135.1  | 176.8  | 112.1  | 116.8  | 79.9   | 0.61 | 1.6E-01 |
| B035DRAFT_02062 | efflux transporter, outer membrane factor (OMF) lipoprotein, NodT family                                  | 177.9  | 111.4  | 166.9  | 86.1   | 94.7   | 63.1   | 0.54 | 1.5E-01 |
| B035DRAFT_02063 | hypothetical protein                                                                                      | 140.3  | 131.3  | 144.2  | 122.5  | 135.4  | 149.3  | 0.98 | 8.5E-01 |

|                 |                                                                                                            |        |        |        |        |        |        |      |         |
|-----------------|------------------------------------------------------------------------------------------------------------|--------|--------|--------|--------|--------|--------|------|---------|
| B035DRAFT_02064 | hypothetical protein                                                                                       | 25.1   | 23.9   | 30.0   | 45.4   | 59.2   | 74.0   | 2.23 | 6.1E-02 |
| B035DRAFT_02065 | Electron transfer flavoprotein, beta subunit                                                               | 120.9  | 131.3  | 111.7  | 104.8  | 156.0  | 110.2  | 1.01 | 9.9E-01 |
| B035DRAFT_02066 | Electron transfer flavoprotein, alpha subunit                                                              | 283.7  | 249.1  | 257.1  | 232.2  | 292.6  | 238.7  | 0.96 | 8.1E-01 |
| B035DRAFT_02067 | S23 ribosomal protein.                                                                                     | 550.7  | 523.6  | 568.6  | 451.8  | 508.0  | 672.9  | 0.98 | 9.3E-01 |
| B035DRAFT_02068 | Acyl-CoA dehydrogenases                                                                                    | 431.9  | 394.1  | 426.5  | 351.1  | 459.6  | 469.3  | 1.01 | 9.4E-01 |
| B035DRAFT_02069 | Histidine carboxylase PI chain.                                                                            | 823.8  | 643.6  | 638.6  | 791.6  | 791.8  | 648.9  | 1.06 | 7.6E-01 |
| B035DRAFT_02070 | uncharacterized domain 1                                                                                   | 89.2   | 93.6   | 93.0   | 77.0   | 96.5   | 75.1   | 0.90 | 4.5E-01 |
| B035DRAFT_02071 | Domain of unknown function (DUF2027)./Smr domain.                                                          | 62.4   | 66.9   | 59.8   | 58.1   | 75.4   | 64.1   | 1.04 | 8.0E-01 |
| B035DRAFT_02072 | hypothetical protein                                                                                       | 11.5   | 11.0   | 8.4    | 7.9    | 10.2   | 9.1    | 0.88 | 5.8E-01 |
| B035DRAFT_02073 | Predicted bile acid beta-glucosidase (GH116)                                                               | 14.1   | 14.4   | 12.6   | 9.0    | 12.0   | 8.1    | 0.70 | 1.7E-01 |
| B035DRAFT_02074 | SusD family                                                                                                | 8.2    | 6.4    | 7.6    | 4.8    | 5.9    | 5.8    | 0.75 | 1.7E-01 |
| B035DRAFT_02075 | TonB-linked outer membrane protein, SusC/RagA family                                                       | 9.3    | 9.4    | 9.0    | 6.1    | 7.3    | 8.2    | 0.78 | 1.8E-01 |
| B035DRAFT_02076 | Fe2+-dicitrate sensor, membrane component                                                                  | 16.5   | 19.0   | 14.8   | 17.0   | 21.0   | 21.2   | 1.18 | 3.8E-01 |
| B035DRAFT_02077 | RNA polymerase sigma-70 factor, Bacteroides expansion family 1                                             | 69.4   | 61.8   | 81.0   | 73.0   | 71.4   | 75.2   | 1.04 | 7.9E-01 |
| B035DRAFT_02078 | S-adenosylmethionine:tRNA-ribosyltransferase-isomerase (queuine synthetase)( EC:5.)                        | 116.7  | 123.2  | 104.6  | 156.7  | 166.6  | 132.4  | 1.32 | 1.4E-01 |
| B035DRAFT_02079 | urocanate hydratase( EC:4.2.1.49 )                                                                         | 15.8   | 11.1   | 16.6   | 21.9   | 22.4   | 18.7   | 1.47 | 1.9E-01 |
| B035DRAFT_02080 | glutamate formiminotransferase( EC:2.1.2.5 )                                                               | 14.2   | 8.7    | 14.8   | 10.4   | 12.9   | 11.6   | 0.95 | 8.8E-01 |
| B035DRAFT_02081 | imidazolonepropionase( EC:3.5.2.7 )                                                                        | 26.2   | 21.9   | 27.7   | 24.1   | 21.5   | 13.3   | 0.76 | 4.3E-01 |
| B035DRAFT_02082 | Methenyl tetrahydrofolate cyclohydrolase                                                                   | 16.2   | 11.6   | 10.5   | 6.8    | 12.3   | 16.0   | 0.88 | 8.1E-01 |
| B035DRAFT_02083 | histidine ammonia-lyase( EC:4.3.1.3 )                                                                      | 14.0   | 11.8   | 18.3   | 8.6    | 13.4   | 11.6   | 0.76 | 4.2E-01 |
| B035DRAFT_02084 | Isopentenylidiphosphate isomerase                                                                          | 58.3   | 50.2   | 50.1   | 55.4   | 66.6   | 61.0   | 1.15 | 3.1E-01 |
| B035DRAFT_02085 | TonB-linked outer membrane protein, SusC/RagA family                                                       | 26.4   | 23.9   | 24.5   | 13.3   | 15.6   | 16.1   | 0.60 | 2.6E-02 |
| B035DRAFT_02086 | SusD family                                                                                                | 28.4   | 27.1   | 27.0   | 13.3   | 12.4   | 15.6   | 0.50 | 1.4E-02 |
| B035DRAFT_02087 | Glycoside hydrolase (GH109)                                                                                | 266.7  | 288.1  | 240.8  | 268.4  | 334.3  | 326.5  | 1.17 | 3.5E-01 |
| B035DRAFT_02088 | Carbonic anhydrase( EC:4.2.1.1 )                                                                           | 118.8  | 103.0  | 100.7  | 128.3  | 126.9  | 112.4  | 1.14 | 3.0E-01 |
| B035DRAFT_02089 | hypothetical protein                                                                                       | 49.3   | 41.7   | 47.5   | 45.1   | 40.0   | 49.4   | 0.97 | 8.5E-01 |
| B035DRAFT_02090 | Predicted transcriptional regulator                                                                        | 42.6   | 50.8   | 45.7   | 44.8   | 48.0   | 54.2   | 1.06 | 6.9E-01 |
| B035DRAFT_02091 | cAMP-binding proteins - catabolite gene activator and regulatory subunit of cAMP-dependent protein kinases | 80.7   | 95.2   | 83.9   | 80.7   | 82.8   | 64.2   | 0.87 | 4.3E-01 |
| B035DRAFT_02092 | Na+-driven multidrug efflux pump                                                                           | 6.9    | 6.5    | 8.5    | 6.3    | 8.7    | 4.8    | 0.88 | 7.3E-01 |
| B035DRAFT_02093 | ( tRNA )                                                                                                   | 0.0    | 0.0    | 0.0    | 0.0    | 0.0    | 0.0    | 0.00 |         |
| B035DRAFT_02094 | hypothetical protein                                                                                       | 243.6  | 287.9  | 271.1  | 263.3  | 300.3  | 314.8  | 1.09 | 4.9E-01 |
| B035DRAFT_02095 | chaperonin GroL                                                                                            | 1776.6 | 1568.6 | 1635.3 | 1518.8 | 1527.0 | 1453.7 | 0.90 | 2.1E-01 |
| B035DRAFT_02096 | Co-chaperonin GroES (HSP10)                                                                                | 1467.7 | 1347.2 | 1117.4 | 1349.0 | 1162.8 | 1118.5 | 0.93 | 6.7E-01 |
| B035DRAFT_02097 | [FeFe] hydrogenase, group B1/B3                                                                            | 114.7  | 116.4  | 114.9  | 88.4   | 103.2  | 95.6   | 0.83 | 8.7E-02 |
| B035DRAFT_02098 | [FeFe] hydrogenase H-cluster radical SAM maturase HydE( EC:2.8.1.6 )                                       | 108.8  | 113.7  | 127.2  | 91.6   | 92.6   | 89.8   | 0.79 | 6.1E-02 |
| B035DRAFT_02099 | [FeFe] hydrogenase H-cluster radical SAM maturase HydG                                                     | 35.6   | 37.5   | 35.1   | 32.5   | 41.2   | 29.8   | 0.95 | 7.7E-01 |
| B035DRAFT_02100 | [FeFe] hydrogenase H-cluster maturation GTPase HydF                                                        | 38.8   | 42.3   | 40.1   | 37.1   | 42.1   | 33.0   | 0.92 | 5.5E-01 |
| B035DRAFT_02101 | Dipeptidyl aminopeptidases/acylaminoacyl-peptidases (CE10)                                                 | 58.8   | 58.9   | 56.6   | 48.3   | 63.0   | 67.8   | 1.02 | 9.3E-01 |
| B035DRAFT_02102 | histidyl-tRNA synthetase( EC:6.1.1.21 )                                                                    | 200.2  | 201.8  | 187.3  | 180.4  | 222.8  | 182.8  | 0.99 | 9.5E-01 |
| B035DRAFT_02103 | Site-specific recombinase XerD                                                                             | 15.6   | 13.2   | 15.0   | 13.0   | 12.3   | 9.6    | 0.79 | 2.6E-01 |
| B035DRAFT_02104 | hypothetical protein                                                                                       | 33.4   | 31.9   | 32.3   | 27.5   | 25.3   | 38.3   | 0.92 | 7.1E-01 |
| B035DRAFT_02105 | hypothetical protein                                                                                       | 86.5   | 96.2   | 84.6   | 77.6   | 73.4   | 102.9  | 0.94 | 7.7E-01 |
| B035DRAFT_02106 | hypothetical protein                                                                                       | 8.8    | 8.2    | 7.0    | 12.2   | 10.2   | 7.7    | 1.24 | 4.4E-01 |
| B035DRAFT_02107 | hypothetical protein                                                                                       | 6.1    | 7.1    | 5.5    | 7.7    | 6.9    | 5.1    | 1.04 | 8.8E-01 |
| B035DRAFT_02108 | Plasmid recombination enzyme.                                                                              | 4.9    | 5.3    | 4.9    | 6.7    | 6.6    | 2.6    | 0.96 | 9.6E-01 |
| B035DRAFT_02109 | hypothetical protein                                                                                       | 84.8   | 99.4   | 83.0   | 106.4  | 93.8   | 117.1  | 1.19 | 3.0E-01 |
| B035DRAFT_02110 | hypothetical protein                                                                                       | 56.8   | 69.9   | 55.7   | 62.5   | 66.8   | 80.5   | 1.15 | 4.6E-01 |
| B035DRAFT_02111 | Superfamily I DNA and RNA helicases( EC:3.6.4.12 )                                                         | 23.5   | 30.1   | 27.9   | 26.0   | 26.7   | 27.2   | 0.98 | 9.2E-01 |
| B035DRAFT_02112 | Predicted Zn-dependent protease                                                                            | 400.9  | 424.2  | 394.2  | 678.4  | 627.6  | 584.8  | 1.55 | 1.8E-02 |

|                        |                                                                                                                  |              |              |              |              |              |              |  |             |                |
|------------------------|------------------------------------------------------------------------------------------------------------------|--------------|--------------|--------------|--------------|--------------|--------------|--|-------------|----------------|
| B035DRAFT_02113        | AraC-type DNA-binding domain-containing proteins                                                                 | 35.1         | 36.7         | 33.3         | 62.4         | 53.9         | 64.3         |  | 1.72        | 1.9E-02        |
| B035DRAFT_02114        | Uncharacterized protein conserved in bacteria                                                                    | 68.0         | 68.2         | 71.8         | 76.7         | 73.5         | 73.3         |  | 1.07        | 1.5E-01        |
| B035DRAFT_02115        | Outer membrane protein/protective antigen OMA87                                                                  | 71.5         | 65.0         | 78.4         | 84.4         | 89.4         | 84.3         |  | 1.20        | 1.5E-01        |
| B035DRAFT_02116        | hypothetical protein                                                                                             | 774.0        | 770.8        | 687.4        | 603.7        | 762.8        | 933.9        |  | 1.02        | 9.5E-01        |
| B035DRAFT_02117        | hypothetical protein                                                                                             | 10.5         | 13.1         | 12.8         | 11.1         | 18.4         | 25.2         |  | 1.43        | 4.3E-01        |
| B035DRAFT_02118        | Peptidyl-prolyl cis-trans isomerase (rotamase) - cyclophilin family( EC:5.2.1.8 )                                | 207.6        | 222.5        | 176.2        | 233.7        | 243.3        | 227.2        |  | 1.17        | 2.7E-01        |
| B035DRAFT_02119        | Predicted Zn-dependent peptidases                                                                                | 126.8        | 135.9        | 117.5        | 125.5        | 138.7        | 143.0        |  | 1.07        | 5.1E-01        |
| B035DRAFT_02120        | putative efflux protein, MATE family                                                                             | 175.4        | 162.8        | 157.1        | 116.4        | 119.3        | 119.5        |  | 0.72        | 1.5E-02        |
| B035DRAFT_02121        | Signal transduction histidine kinase                                                                             | 100.7        | 93.2         | 89.1         | 77.1         | 71.7         | 75.8         |  | 0.79        | 5.3E-02        |
| B035DRAFT_02122        | Response regulator containing CheY-like receiver, AAA-type ATPase, and DNA-binding domains                       | 72.7         | 77.3         | 74.2         | 62.4         | 59.3         | 67.8         |  | 0.84        | 9.7E-02        |
| B035DRAFT_02123        | Protein of unknown function (DUF2874).                                                                           | 2686.8       | 3112.3       | 2396.8       | 457.9        | 405.8        | 490.2        |  | 0.17        | 1.6E-03        |
| B035DRAFT_02124        | Pseudouridylate synthases, 23S RNA-specific( EC:5.4.99.23 )                                                      | 931.6        | 1003.7       | 806.6        | 686.2        | 1003.5       | 1094.8       |  | 1.00        | 1.0E+00        |
| B035DRAFT_02125        | 3-oxoacyl-(acyl-carrier-protein) reductase( EC:1.1.1.100 )                                                       | 986.0        | 1046.0       | 861.6        | 772.0        | 1066.4       | 1212.8       |  | 1.04        | 8.9E-01        |
| B035DRAFT_02126        | Transcriptional regulator                                                                                        | 90.4         | 93.9         | 85.0         | 94.2         | 100.0        | 85.5         |  | 1.04        | 7.1E-01        |
| B035DRAFT_02127        | ( tRNA )                                                                                                         | 120.0        | 93.0         | 62.2         | 91.3         | 50.4         | 48.5         |  | 0.68        | 4.6E-01        |
| B035DRAFT_02128        | SusD family                                                                                                      | 39.5         | 41.8         | 39.8         | 17.8         | 19.0         | 21.6         |  | 0.48        | 7.1E-03        |
| B035DRAFT_02129        | hypothetical protein                                                                                             | 0.0          | 0.0          | 0.0          | 0.0          | 0.0          | 0.0          |  | 0.00        |                |
| <b>B035DRAFT_02130</b> | <b>TonB-linked outer membrane protein, SusC/RagA family</b>                                                      | <b>170.4</b> | <b>166.9</b> | <b>156.4</b> | <b>426.7</b> | <b>614.4</b> | <b>711.6</b> |  | <b>3.47</b> | <b>2.3E-02</b> |
| B035DRAFT_02131        | SusD family                                                                                                      | 228.4        | 213.6        | 202.2        | 577.9        | 825.5        | 974.4        |  | 3.61        | 2.2E-02        |
| B035DRAFT_02132        | Alpha-L-fucosidase( EC:3.2.1.51 ) (GH29)                                                                         | 140.6        | 142.9        | 145.7        | 115.2        | 121.0        | 107.4        |  | 0.80        | 4.1E-02        |
| B035DRAFT_02133        | hypothetical protein                                                                                             | 148.0        | 128.4        | 155.0        | 93.5         | 99.1         | 58.4         |  | 0.57        | 1.5E-01        |
| B035DRAFT_02134        | Acyl-coenzyme A synthetases/AMP-(fatty) acid ligases( EC:6.2.1.1 )                                               | 308.5        | 280.9        | 317.7        | 245.5        | 249.6        | 183.8        |  | 0.74        | 1.8E-01        |
| B035DRAFT_02135        | Cupin domain.                                                                                                    | 215.5        | 208.7        | 219.3        | 201.9        | 186.2        | 147.7        |  | 0.83        | 2.9E-01        |
| B035DRAFT_02136        | hypothetical protein                                                                                             | 2.2          | 1.7          | 4.4          | 2.3          | 2.7          | 0.0          |  | 0.97        | 9.6E-01        |
| B035DRAFT_02137        | His Kinase A (phosphoacceptor) domain./Histidine kinase-, DNA gyrase B-, and HSP90-like ATPase.                  | 31.0         | 34.3         | 31.1         | 57.9         | 54.5         | 58.8         |  | 1.78        | 4.5E-03        |
| B035DRAFT_02138        | pyrroline-5-carboxylate reductase( EC:1.5.1.2 )                                                                  | 80.4         | 84.4         | 87.6         | 150.1        | 147.2        | 104.7        |  | 1.57        | 1.1E-01        |
| B035DRAFT_02139        | Lysophospholipase L1 and related esterases (CE3)                                                                 | 49.6         | 62.9         | 51.4         | 74.1         | 72.1         | 96.7         |  | 1.48        | 1.4E-01        |
| B035DRAFT_02140        | Uncharacterized proteins of the AP superfamily                                                                   | 6.0          | 7.8          | 7.5          | 7.7          | 8.5          | 7.1          |  | 1.10        | 6.0E-01        |
| B035DRAFT_02141        | Phosphate-selective porin                                                                                        | 23.4         | 20.6         | 17.9         | 22.4         | 20.2         | 20.3         |  | 1.02        | 9.1E-01        |
| B035DRAFT_02142        | Ornithine/acetylornithine aminotransferase( EC:2.6.1.11 )                                                        | 292.7        | 265.8        | 254.2        | 288.5        | 318.6        | 253.0        |  | 1.06        | 7.1E-01        |
| B035DRAFT_02143        | N-acetyl-gamma-glutamyl-phosphate reductase, common form( EC:1.2.1.-,EC:1.2.1.38 )                               | 175.5        | 171.8        | 146.8        | 164.4        | 210.8        | 207.5        |  | 1.18        | 3.8E-01        |
| B035DRAFT_02144        | Argininosuccinate synthase( EC:6.3.4.5 )                                                                         | 177.3        | 145.5        | 134.5        | 160.0        | 197.3        | 164.7        |  | 1.14        | 4.8E-01        |
| B035DRAFT_02145        | hypothetical protein                                                                                             | 166.5        | 136.9        | 136.7        | 136.4        | 147.4        | 104.3        |  | 0.88        | 5.5E-01        |
| B035DRAFT_02146        | arginine repressor                                                                                               | 48.2         | 53.1         | 54.7         | 50.3         | 49.1         | 37.7         |  | 0.87        | 4.6E-01        |
| B035DRAFT_02147        | His Kinase A (phosphoacceptor) domain.                                                                           | 32.9         | 39.0         | 38.2         | 33.7         | 34.4         | 36.7         |  | 0.95        | 6.6E-01        |
| B035DRAFT_02148        | His Kinase A (phosphoacceptor) domain./Histidine kinase-, DNA gyrase B-, and HSP90-like ATPase.                  | 35.6         | 34.9         | 32.8         | 36.4         | 43.7         | 42.1         |  | 1.18        | 1.9E-01        |
| B035DRAFT_02149        | Sugar (pentulose and hexulose) kinases( EC:2.7.1.5 )                                                             | 42.4         | 39.0         | 37.7         | 40.6         | 50.8         | 47.8         |  | 1.16        | 3.0E-01        |
| B035DRAFT_02150        | Ribulose-5-phosphate 4-epimerase and related epimerases and aldolases( EC:4.1.2.19 )                             | 200.8        | 201.7        | 188.0        | 205.7        | 211.0        | 241.7        |  | 1.11        | 3.1E-01        |
| B035DRAFT_02151        | hypothetical protein                                                                                             | 104.8        | 106.4        | 90.2         | 103.7        | 111.7        | 132.5        |  | 1.15        | 3.9E-01        |
| B035DRAFT_02152        | Soluble lytic murein transglycosylase and related regulatory proteins (some contain LysM/invasin domains) (GH23) | 48.0         | 49.6         | 56.6         | 65.6         | 58.6         | 57.5         |  | 1.18        | 2.1E-01        |
| B035DRAFT_02153        | Kef-type K+ transport systems, predicted NAD-binding component                                                   | 45.8         | 45.2         | 51.7         | 43.3         | 41.4         | 40.4         |  | 0.88        | 1.8E-01        |
| B035DRAFT_02154        | Beta-galactosidase/beta-glucuronidase( EC:3.2.1.23 ) (GH2)                                                       | 258.9        | 233.0        | 234.0        | 236.2        | 295.1        | 260.9        |  | 1.09        | 5.2E-01        |
| B035DRAFT_02155        | hypothetical protein                                                                                             | 43.3         | 63.5         | 66.4         | 48.8         | 61.6         | 63.7         |  | 1.02        | 9.6E-01        |
| B035DRAFT_02156        | Glycoside hydrolase (GH109)                                                                                      | 153.6        | 153.2        | 166.1        | 177.7        | 159.8        | 71.2         |  | 0.80        | 6.8E-01        |

|                 |                                                                                          |         |         |         |        |        |         |      |         |
|-----------------|------------------------------------------------------------------------------------------|---------|---------|---------|--------|--------|---------|------|---------|
| B035DRAFT_02157 | Predicted glycosylase (GH130)                                                            | 180.1   | 184.4   | 176.6   | 180.2  | 181.4  | 107.2   | 0.84 | 5.9E-01 |
| B035DRAFT_02158 | hypothetical protein                                                                     | 49.4    | 49.4    | 61.9    | 56.7   | 50.1   | 32.8    | 0.85 | 6.3E-01 |
| B035DRAFT_02159 | Metal-dependent hydrolase                                                                | 76.1    | 79.1    | 81.4    | 73.4   | 70.0   | 60.2    | 0.86 | 2.2E-01 |
| B035DRAFT_02160 | hypothetical protein                                                                     | 72.4    | 81.6    | 81.9    | 43.4   | 48.8   | 59.9    | 0.64 | 8.2E-02 |
| B035DRAFT_02161 | Response regulator containing CheY-like receiver domain and AraC-type DNA-binding domain | 28.0    | 27.1    | 27.8    | 10.9   | 17.1   | 14.9    | 0.51 | 6.3E-02 |
| B035DRAFT_02162 | Ion channel.                                                                             | 30.9    | 33.4    | 31.7    | 25.1   | 30.6   | 36.5    | 0.95 | 8.1E-01 |
| B035DRAFT_02163 | hypothetical protein                                                                     | 409.4   | 520.3   | 567.2   | 558.8  | 491.4  | 479.0   | 1.03 | 9.0E-01 |
| B035DRAFT_02164 | hypothetical protein                                                                     | 57.6    | 57.1    | 48.8    | 43.8   | 51.0   | 46.9    | 0.87 | 2.9E-01 |
| B035DRAFT_02165 | Small-conductance mechanosensitive channel                                               | 32.1    | 35.5    | 34.5    | 27.3   | 32.6   | 37.0    | 0.94 | 7.3E-01 |
| B035DRAFT_02166 | hypothetical protein                                                                     | 45.7    | 47.9    | 45.0    | 42.7   | 45.5   | 55.6    | 1.03 | 8.5E-01 |
| B035DRAFT_02167 | alpha-1,2-mannosidase, putative (GH92)                                                   | 69.9    | 65.0    | 65.8    | 58.1   | 68.3   | 51.5    | 0.88 | 4.1E-01 |
| B035DRAFT_02168 | alpha-1,2-mannosidase, putative (GH92)                                                   | 73.8    | 63.5    | 82.2    | 69.6   | 69.2   | 55.9    | 0.89 | 5.2E-01 |
| B035DRAFT_02169 | alpha-1,2-mannosidase, putative (GH92)                                                   | 53.7    | 50.8    | 53.9    | 65.4   | 70.0   | 63.9    | 1.26 | 3.3E-02 |
| B035DRAFT_02170 | hypothetical protein                                                                     | 37.9    | 56.3    | 45.5    | 48.7   | 51.3   | 55.4    | 1.13 | 5.9E-01 |
| B035DRAFT_02171 | Predicted membrane protein                                                               | 213.0   | 205.5   | 216.1   | 151.8  | 164.7  | 194.8   | 0.80 | 1.7E-01 |
| B035DRAFT_02172 | Membrane protein of unknown function (DUF340).                                           | 135.6   | 128.8   | 123.8   | 117.9  | 112.0  | 137.6   | 0.94 | 6.4E-01 |
| B035DRAFT_02173 | AraC-type DNA-binding domain-containing proteins                                         | 37.9    | 42.8    | 36.7    | 39.3   | 58.4   | 59.6    | 1.32 | 3.1E-01 |
| B035DRAFT_02174 | Periplasmic component of the Tol biopolymer transport system                             | 21.5    | 19.8    | 26.4    | 20.5   | 19.2   | 17.8    | 0.86 | 3.8E-01 |
| B035DRAFT_02175 | hypothetical protein                                                                     | 3.1     | 2.0     | 2.9     | 2.3    | 2.5    | 2.2     | 0.90 | 6.7E-01 |
| B035DRAFT_02176 | hypothetical protein                                                                     | 3.7     | 0.0     | 1.5     | 1.3    | 4.4    | 2.2     | 1.00 | 1.0E+00 |
| B035DRAFT_02177 | TonB-linked outer membrane protein, SusC/RagA family                                     | 6.7     | 5.3     | 5.4     | 4.2    | 4.7    | 3.9     | 0.74 | 1.4E-01 |
| B035DRAFT_02178 | SusD family                                                                              | 7.3     | 5.2     | 5.7     | 5.3    | 5.8    | 5.0     | 0.89 | 5.6E-01 |
| B035DRAFT_02179 | Arylsulfotransferase (ASST).( EC:2.8.2.22 )                                              | 7.6     | 9.5     | 7.3     | 7.2    | 6.5    | 6.5     | 0.83 | 2.8E-01 |
| B035DRAFT_02180 | hypothetical protein                                                                     | 12.9    | 15.1    | 16.5    | 11.0   | 17.7   | 11.0    | 0.88 | 6.7E-01 |
| B035DRAFT_02181 | Alpha-glucosidases (GH31)                                                                | 35.5    | 35.9    | 33.9    | 29.9   | 33.5   | 36.5    | 0.95 | 6.1E-01 |
| B035DRAFT_02182 | hypothetical protein                                                                     | 14.5    | 25.8    | 14.5    | 18.0   | 20.9   | 14.7    | 1.01 | 9.9E-01 |
| B035DRAFT_02183 | hypothetical protein                                                                     | 5.3     | 8.2     | 3.2     | 9.3    | 5.6    | 1.6     | 0.84 | 8.8E-01 |
| B035DRAFT_02184 | hypothetical protein                                                                     | 3.6     | 6.6     | 3.1     | 2.7    | 6.1    | 6.1     | 1.10 | 8.9E-01 |
| B035DRAFT_02185 | Transposase DDE domain.                                                                  | 11.9    | 13.2    | 8.8     | 10.9   | 9.4    | 14.6    | 1.02 | 9.5E-01 |
| B035DRAFT_02186 | hypothetical protein                                                                     | 7.8     | 5.6     | 8.3     | 8.2    | 11.4   | 11.5    | 1.44 | 2.6E-01 |
| B035DRAFT_02187 | Glycoside hydrolase (GH42)                                                               | 31.1    | 38.5    | 34.5    | 25.5   | 30.0   | 31.4    | 0.83 | 2.9E-01 |
| B035DRAFT_02188 | hypothetical protein                                                                     | 6.5     | 7.4     | 7.1     | 4.0    | 3.7    | 5.9     | 0.64 | 1.6E-01 |
| B035DRAFT_02189 | hypothetical protein                                                                     | 4.5     | 5.0     | 6.1     | 4.3    | 4.2    | 6.6     | 0.96 | 9.2E-01 |
| B035DRAFT_02190 | hypothetical protein                                                                     | 6.3     | 7.3     | 4.6     | 2.6    | 6.8    | 4.5     | 0.73 | 5.8E-01 |
| B035DRAFT_02191 | hypothetical protein                                                                     | 19.7    | 10.1    | 27.3    | 12.5   | 10.8   | 12.1    | 0.67 | 4.6E-01 |
| B035DRAFT_02192 | hypothetical protein                                                                     | 79.2    | 55.8    | 60.9    | 51.2   | 47.9   | 58.1    | 0.81 | 3.5E-01 |
| B035DRAFT_02193 | hypothetical protein                                                                     | 52.6    | 59.0    | 66.3    | 41.8   | 29.3   | 46.1    | 0.65 | 1.8E-01 |
| B035DRAFT_02194 | AraC-type DNA-binding domain-containing proteins                                         | 688.2   | 878.7   | 742.4   | 626.9  | 600.2  | 679.2   | 0.83 | 2.4E-01 |
| B035DRAFT_02195 | hypothetical protein                                                                     | 11695.4 | 12409.2 | 11563.8 | 8235.5 | 9844.0 | 12904.4 | 0.85 | 5.1E-01 |
| B035DRAFT_02196 | hypothetical protein                                                                     | 19.0    | 15.0    | 25.6    | 22.1   | 22.8   | 25.3    | 1.20 | 5.2E-01 |
| B035DRAFT_02197 | hypothetical protein                                                                     | 11.5    | 16.0    | 7.7     | 13.9   | 10.4   | 14.6    | 1.14 | 7.6E-01 |
| B035DRAFT_02198 | hypothetical protein                                                                     | 9.3     | 5.8     | 5.2     | 5.3    | 8.4    | 9.7     | 1.15 | 7.7E-01 |
| B035DRAFT_02199 | hypothetical protein                                                                     | 12.3    | 8.5     | 13.0    | 10.6   | 10.6   | 5.5     | 0.77 | 5.8E-01 |
| B035DRAFT_02200 | TonB-linked outer membrane protein, SusC/RagA family                                     | 134.2   | 148.5   | 136.1   | 104.9  | 142.9  | 133.9   | 0.90 | 5.8E-01 |
| B035DRAFT_02201 | SusD family                                                                              | 364.5   | 358.9   | 326.8   | 272.3  | 450.6  | 445.8   | 1.09 | 8.0E-01 |
| B035DRAFT_02202 | Alpha-L-fucosidase (GH29)                                                                | 117.2   | 119.9   | 101.9   | 70.9   | 115.9  | 96.5    | 0.82 | 4.7E-01 |
| B035DRAFT_02203 | Alpha-L-fucosidase (CBM32)                                                               | 102.9   | 90.1    | 85.9    | 63.1   | 107.6  | 91.4    | 0.92 | 7.9E-01 |
| B035DRAFT_02204 | ( tRNA )                                                                                 | 44.5    | 78.8    | 55.4    | 50.3   | 40.3   | 41.4    | 0.76 | 4.0E-01 |
| B035DRAFT_02205 | ( tRNA )                                                                                 | 85.6    | 59.2    | 115.4   | 104.7  | 48.2   | 35.8    | 0.68 | 5.6E-01 |
| B035DRAFT_02206 | hypothetical protein                                                                     | 369.6   | 390.5   | 395.9   | 406.8  | 374.3  | 454.9   | 1.07 | 5.6E-01 |

|                 |                                                                                                            |       |       |       |       |       |       |      |         |
|-----------------|------------------------------------------------------------------------------------------------------------|-------|-------|-------|-------|-------|-------|------|---------|
| B035DRAFT_02207 | Predicted P-loop ATPase and inactivated derivatives                                                        | 39.1  | 22.6  | 26.6  | 32.8  | 27.3  | 11.4  | 0.76 | 6.8E-01 |
| B035DRAFT_02208 | hypothetical protein                                                                                       | 0.0   | 0.0   | 0.0   | 0.0   | 0.0   | 0.0   | 0.00 |         |
| B035DRAFT_02209 | hypothetical protein                                                                                       | 25.9  | 33.0  | 34.6  | 23.0  | 25.3  | 17.5  | 0.70 | 2.2E-01 |
| B035DRAFT_02210 | hypothetical protein                                                                                       | 39.1  | 30.3  | 35.1  | 17.3  | 26.1  | 16.2  | 0.56 | 1.3E-01 |
| B035DRAFT_02211 | hypothetical protein                                                                                       | 36.6  | 26.7  | 24.0  | 19.8  | 25.1  | 16.6  | 0.71 | 3.0E-01 |
| B035DRAFT_02212 | N-acetylmuramoyl-L-alanine amidase( EC:3.5.1.28 )                                                          | 41.3  | 33.4  | 27.1  | 24.4  | 22.0  | 22.3  | 0.68 | 1.6E-01 |
| B035DRAFT_02213 | hypothetical protein                                                                                       | 32.0  | 26.8  | 29.6  | 24.0  | 20.6  | 25.2  | 0.79 | 1.6E-01 |
| B035DRAFT_02214 | hypothetical protein                                                                                       | 26.7  | 28.4  | 28.3  | 19.4  | 19.4  | 22.5  | 0.73 | 4.8E-02 |
| B035DRAFT_02215 | hypothetical protein                                                                                       | 37.2  | 29.5  | 30.9  | 32.9  | 29.0  | 25.7  | 0.90 | 5.6E-01 |
| B035DRAFT_02216 | hypothetical protein                                                                                       | 51.2  | 54.4  | 50.3  | 48.9  | 46.4  | 45.1  | 0.90 | 1.5E-01 |
| B035DRAFT_02217 | hypothetical protein                                                                                       | 20.2  | 17.4  | 19.1  | 13.6  | 15.2  | 21.1  | 0.87 | 5.7E-01 |
| B035DRAFT_02218 | hypothetical protein                                                                                       | 15.1  | 12.2  | 13.4  | 12.5  | 8.3   | 15.4  | 0.87 | 6.8E-01 |
| B035DRAFT_02219 | hypothetical protein                                                                                       | 11.5  | 12.4  | 13.0  | 8.3   | 11.5  | 15.9  | 0.93 | 8.6E-01 |
| B035DRAFT_02220 | hypothetical protein                                                                                       | 13.5  | 9.9   | 5.2   | 3.8   | 7.1   | 13.0  | 0.79 | 7.8E-01 |
| B035DRAFT_02221 | hypothetical protein                                                                                       | 6.6   | 6.7   | 6.0   | 4.4   | 6.0   | 7.5   | 0.90 | 7.3E-01 |
| B035DRAFT_02222 | hypothetical protein                                                                                       | 7.3   | 3.6   | 3.8   | 4.4   | 7.6   | 7.6   | 1.36 | 5.6E-01 |
| B035DRAFT_02223 | hypothetical protein                                                                                       | 8.5   | 7.4   | 8.0   | 7.7   | 7.3   | 5.8   | 0.86 | 4.1E-01 |
| B035DRAFT_02224 | hypothetical protein                                                                                       | 13.0  | 7.9   | 5.9   | 7.2   | 8.0   | 7.4   | 0.88 | 7.8E-01 |
| B035DRAFT_02225 | hypothetical protein                                                                                       | 2.7   | 6.2   | 4.0   | 4.2   | 7.2   | 7.8   | 1.53 | 4.5E-01 |
| B035DRAFT_02226 | hypothetical protein                                                                                       | 9.9   | 7.4   | 7.8   | 9.8   | 8.4   | 11.6  | 1.19 | 4.6E-01 |
| B035DRAFT_02227 | hypothetical protein                                                                                       | 5.8   | 9.6   | 7.1   | 4.4   | 5.3   | 11.3  | 0.87 | 8.2E-01 |
| B035DRAFT_02228 | hypothetical protein                                                                                       | 5.9   | 7.7   | 5.1   | 5.9   | 4.1   | 5.1   | 0.81 | 4.6E-01 |
| B035DRAFT_02229 | hypothetical protein                                                                                       | 5.2   | 5.4   | 2.8   | 1.2   | 3.7   | 2.1   | 0.49 | 3.3E-01 |
| B035DRAFT_02230 | hypothetical protein                                                                                       | 6.6   | 7.7   | 4.7   | 1.7   | 2.5   | 3.5   | 0.40 | 1.1E-01 |
| B035DRAFT_02231 | hypothetical protein                                                                                       | 5.8   | 4.3   | 0.6   | 3.4   | 3.9   | 2.4   | 1.24 | 8.8E-01 |
| B035DRAFT_02232 | hypothetical protein                                                                                       | 3.9   | 4.6   | 3.1   | 2.3   | 5.2   | 2.6   | 0.82 | 7.1E-01 |
| B035DRAFT_02233 | hypothetical protein                                                                                       | 3.1   | 0.7   | 5.3   | 2.0   | 6.2   | 2.8   | 1.42 | 7.8E-01 |
| B035DRAFT_02234 | 3'-phosphoadenosine 5'-phosphosulfate sulfotransferase (PAPS reductase)/FAD synthetase and related enzymes | 4.5   | 5.2   | 2.8   | 3.1   | 2.6   | 3.0   | 0.72 | 3.5E-01 |
| B035DRAFT_02235 | hypothetical protein                                                                                       | 3.5   | 3.1   | 6.1   | 3.2   | 2.4   | 5.3   | 0.86 | 7.9E-01 |
| B035DRAFT_02236 | DNA-methyltransferase (dcm)( EC:2.1.1.37 )                                                                 | 7.0   | 4.3   | 5.8   | 5.0   | 4.7   | 4.0   | 0.81 | 4.6E-01 |
| B035DRAFT_02237 | hypothetical protein                                                                                       | 4.7   | 2.2   | 0.0   | 0.0   | 3.4   | 5.1   | 1.30 | 7.6E-01 |
| B035DRAFT_02238 | hypothetical protein                                                                                       | 5.1   | 6.1   | 3.4   | 4.7   | 4.8   | 5.3   | 1.05 | 8.9E-01 |
| B035DRAFT_02239 | hypothetical protein                                                                                       | 3.4   | 5.0   | 6.4   | 3.9   | 4.8   | 5.0   | 0.95 | 8.9E-01 |
| B035DRAFT_02240 | VRR-NUC domain.                                                                                            | 6.9   | 5.7   | 7.0   | 4.7   | 9.6   | 4.1   | 0.88 | 8.0E-01 |
| B035DRAFT_02241 | hypothetical protein                                                                                       | 4.4   | 2.2   | 3.7   | 6.1   | 5.7   | 4.0   | 1.57 | 3.3E-01 |
| B035DRAFT_02242 | Bacterial nucleoid DNA-binding protein                                                                     | 3.7   | 1.4   | 6.7   | 3.9   | 5.0   | 5.6   | 1.45 | 6.6E-01 |
| B035DRAFT_02243 | hypothetical protein                                                                                       | 3.8   | 1.1   | 1.1   | 1.0   | 1.7   | 2.6   | 0.97 | 9.8E-01 |
| B035DRAFT_02244 | Metal-dependent hydrolases of the beta-lactamase superfamily I                                             | 2.9   | 4.5   | 5.5   | 4.7   | 4.9   | 4.3   | 1.12 | 7.5E-01 |
| B035DRAFT_02245 | hypothetical protein                                                                                       | 11.2  | 8.4   | 9.0   | 11.6  | 13.9  | 10.3  | 1.25 | 3.3E-01 |
| B035DRAFT_02246 | hypothetical protein                                                                                       | 4.9   | 3.4   | 3.3   | 5.4   | 6.4   | 5.2   | 1.49 | 1.8E-01 |
| B035DRAFT_02247 | ( tRNA )                                                                                                   | 0.0   | 0.0   | 0.0   | 0.0   | 1.7   | 0.0   | 0.00 |         |
| B035DRAFT_02248 | hypothetical protein                                                                                       | 1.3   | 1.5   | 0.8   | 1.3   | 1.7   | 0.0   | 1.34 | 5.1E-01 |
| B035DRAFT_02249 | hypothetical protein                                                                                       | 0.0   | 0.0   | 0.0   | 1.7   | 2.9   | 3.6   | 0.00 |         |
| B035DRAFT_02250 | hypothetical protein                                                                                       | 1.7   | 0.0   | 1.0   | 2.7   | 0.8   | 3.1   | 1.40 | 7.3E-01 |
| B035DRAFT_02251 | hypothetical protein                                                                                       | 0.9   | 1.0   | 1.1   | 0.0   | 0.0   | 2.4   | 2.43 |         |
| B035DRAFT_02252 | hypothetical protein                                                                                       | 146.4 | 168.1 | 156.2 | 148.0 | 162.1 | 173.2 | 1.03 | 8.3E-01 |
| B035DRAFT_02253 | hypothetical protein                                                                                       | 128.5 | 146.1 | 118.6 | 119.6 | 121.5 | 168.4 | 1.03 | 9.0E-01 |
| B035DRAFT_02254 | hypothetical protein                                                                                       | 140.2 | 160.4 | 166.5 | 141.7 | 148.5 | 190.9 | 1.02 | 9.1E-01 |
| B035DRAFT_02255 | Multimeric flavodoxin WrbA                                                                                 | 46.8  | 48.3  | 35.2  | 46.0  | 53.8  | 47.5  | 1.14 | 5.1E-01 |
| B035DRAFT_02256 | hypothetical protein                                                                                       | 17.4  | 21.5  | 12.7  | 16.2  | 21.7  | 20.7  | 1.15 | 6.6E-01 |



|                 |                                                                                            |        |        |        |        |        |        |      |         |
|-----------------|--------------------------------------------------------------------------------------------|--------|--------|--------|--------|--------|--------|------|---------|
| B035DRAFT_02257 | ABC-type antimicrobial peptide transport system, permease component                        | 17.3   | 16.6   | 17.6   | 13.4   | 11.0   | 12.1   | 0.71 | 4.5E-02 |
| B035DRAFT_02258 | ABC-type antimicrobial peptide transport system, ATPase component                          | 25.3   | 26.2   | 18.6   | 15.5   | 17.0   | 19.6   | 0.75 | 2.5E-01 |
| B035DRAFT_02259 | ABC-type antimicrobial peptide transport system, permease component                        | 20.2   | 19.6   | 20.2   | 18.5   | 24.8   | 25.7   | 1.14 | 5.0E-01 |
| B035DRAFT_02260 | Response regulator containing CheY-like receiver, AAA-type ATPase, and DNA-binding domains | 26.3   | 27.9   | 27.7   | 29.0   | 33.6   | 30.1   | 1.13 | 2.1E-01 |
| B035DRAFT_02261 | Histidine kinase-, DNA gyrase B-, and HSP90-like ATPase.                                   | 27.5   | 29.3   | 33.6   | 32.8   | 34.7   | 35.1   | 1.14 | 2.9E-01 |
| B035DRAFT_02262 | Dipeptide/tripeptide permease                                                              | 402.7  | 480.5  | 458.4  | 362.7  | 448.5  | 632.1  | 1.05 | 8.8E-01 |
| B035DRAFT_02263 | ybaK/epsC protein                                                                          | 219.7  | 223.8  | 235.6  | 293.8  | 265.9  | 263.8  | 1.21 | 7.0E-02 |
| B035DRAFT_02264 | excinuclease ABC, A subunit                                                                | 131.7  | 133.0  | 134.3  | 148.9  | 153.6  | 133.9  | 1.09 | 2.8E-01 |
| B035DRAFT_02265 | Predicted glycosyl hydrolase (CBM50)                                                       | 177.6  | 189.2  | 170.5  | 208.2  | 210.5  | 229.9  | 1.21 | 8.2E-02 |
| B035DRAFT_02266 | hypothetical protein                                                                       | 198.5  | 206.4  | 202.0  | 227.5  | 243.7  | 250.4  | 1.19 | 5.0E-02 |
| B035DRAFT_02267 | hypothetical protein                                                                       | 110.5  | 112.4  | 106.5  | 169.1  | 202.2  | 195.3  | 1.72 | 1.6E-02 |
| B035DRAFT_02268 | hypothetical protein                                                                       | 184.6  | 251.8  | 238.2  | 213.2  | 216.0  | 255.5  | 1.02 | 9.3E-01 |
| B035DRAFT_02269 | RNA polymerase Rpb6.                                                                       | 1084.4 | 1296.8 | 1078.5 | 1308.8 | 1131.1 | 1271.1 | 1.07 | 6.0E-01 |
| B035DRAFT_02270 | hypothetical protein                                                                       | 492.4  | 577.4  | 517.7  | 498.0  | 449.3  | 502.6  | 0.91 | 4.1E-01 |
| B035DRAFT_02271 | excinuclease ABC, B subunit                                                                | 198.8  | 182.9  | 193.5  | 243.1  | 227.7  | 245.1  | 1.24 | 3.7E-02 |
| B035DRAFT_02272 | Phosphate-selective porin O and P.                                                         | 66.6   | 72.0   | 67.3   | 70.5   | 74.1   | 84.9   | 1.11 | 3.5E-01 |
| B035DRAFT_02273 | Uncharacterized conserved protein                                                          | 70.0   | 85.2   | 81.1   | 91.3   | 90.5   | 96.5   | 1.18 | 2.0E-01 |
| B035DRAFT_02274 | DNA polymerase III, epsilon subunit and related 3"-5" exonucleases( EC:2.7.7.7 )           | 72.2   | 79.1   | 83.2   | 114.2  | 115.2  | 114.3  | 1.47 | 1.7E-02 |
| B035DRAFT_02275 | hypothetical protein                                                                       | 93.2   | 102.7  | 86.2   | 163.5  | 149.6  | 108.5  | 1.48 | 1.7E-01 |
| B035DRAFT_02276 | RNA polymerase sigma factor, sigma-70 family                                               | 67.8   | 54.5   | 39.4   | 41.2   | 38.5   | 54.5   | 0.84 | 6.2E-01 |
| B035DRAFT_02277 | N-acetyl-beta-hexosaminidase( EC:3.2.1.52 ) (GH20)                                         | 109.5  | 110.7  | 108.3  | 112.2  | 131.4  | 119.5  | 1.10 | 2.8E-01 |
| B035DRAFT_02278 | Predicted permease, DMT superfamily                                                        | 73.3   | 97.1   | 84.7   | 69.2   | 68.8   | 87.0   | 0.88 | 5.3E-01 |
| B035DRAFT_02279 | hypothetical protein                                                                       | 64.1   | 81.8   | 68.5   | 57.6   | 48.2   | 68.2   | 0.81 | 3.6E-01 |
| B035DRAFT_02280 | Uncharacterized conserved protein                                                          | 264.3  | 289.0  | 276.9  | 213.4  | 239.0  | 278.0  | 0.88 | 3.7E-01 |
| B035DRAFT_02281 | Lactate dehydrogenase and related dehydrogenases( EC:1.1.1.95 )                            | 234.0  | 269.5  | 268.9  | 207.4  | 225.8  | 262.0  | 0.90 | 4.7E-01 |
| B035DRAFT_02282 | phosphoserine aminotransferase( EC:2.6.1.52 )                                              | 415.8  | 489.2  | 471.0  | 403.3  | 466.7  | 505.7  | 1.00 | 9.9E-01 |
| B035DRAFT_02283 | Superfamily II DNA and RNA helicases                                                       | 98.5   | 90.3   | 96.5   | 99.7   | 113.7  | 117.2  | 1.16 | 2.0E-01 |
| B035DRAFT_02284 | hypothetical protein                                                                       | 37.9   | 41.1   | 42.5   | 53.5   | 59.9   | 62.0   | 1.44 | 3.6E-02 |
| B035DRAFT_02285 | hypothetical protein                                                                       | 135.9  | 126.4  | 150.0  | 172.7  | 151.4  | 196.8  | 1.26 | 2.1E-01 |
| B035DRAFT_02286 | NADH:ubiquinone oxidoreductase, Na(+)-translocating, F subunit( EC:1.6.5.)                 | 1867.2 | 1876.6 | 1887.9 | 1901.6 | 2040.5 | 2027.8 | 1.06 | 2.1E-01 |
| B035DRAFT_02287 | NADH:ubiquinone oxidoreductase, Na(+)-translocating, E subunit( EC:1.6.5.)                 | 1250.4 | 1285.4 | 1218.9 | 1209.3 | 1438.2 | 1637.6 | 1.13 | 4.4E-01 |
| B035DRAFT_02288 | NADH:ubiquinone oxidoreductase, Na(+)-translocating, D subunit( EC:1.6.5.)                 | 776.4  | 876.4  | 841.2  | 795.6  | 934.1  | 1051.1 | 1.11 | 5.1E-01 |
| B035DRAFT_02289 | NADH:ubiquinone oxidoreductase, Na(+)-translocating, C subunit( EC:1.6.5.)                 | 860.1  | 873.3  | 819.2  | 722.9  | 943.7  | 913.6  | 1.00 | 9.8E-01 |
| B035DRAFT_02290 | NADH:ubiquinone oxidoreductase, Na(+)-translocating, B subunit( EC:1.6.5.)                 | 880.1  | 887.0  | 886.0  | 740.4  | 898.9  | 743.9  | 0.89 | 3.5E-01 |
| B035DRAFT_02291 | NADH:ubiquinone oxidoreductase, Na(+)-translocating, A subunit( EC:1.6.5.)                 | 823.1  | 854.0  | 830.7  | 645.6  | 724.8  | 583.4  | 0.78 | 9.5E-02 |
| B035DRAFT_02292 | Aminopeptidase C( EC:3.4.22.40 )                                                           | 128.6  | 124.1  | 109.3  | 116.9  | 147.9  | 108.3  | 1.02 | 9.1E-01 |
| B035DRAFT_02293 | Na+/H+ antiporter NhaC                                                                     | 106.0  | 115.4  | 107.1  | 151.3  | 138.2  | 92.5   | 1.14 | 6.4E-01 |
| B035DRAFT_02294 | Uncharacterized conserved protein                                                          | 1556.9 | 1341.1 | 1499.4 | 1290.2 | 1070.8 | 1173.5 | 0.80 | 1.5E-01 |
| B035DRAFT_02295 | Family of unknown function (DUF490).                                                       | 140.3  | 128.6  | 130.0  | 121.2  | 109.7  | 111.2  | 0.86 | 1.1E-01 |
| B035DRAFT_02296 | hypothetical protein                                                                       | 82.5   | 97.4   | 85.6   | 93.5   | 102.3  | 93.2   | 1.09 | 4.2E-01 |
| B035DRAFT_02297 | hypothetical protein                                                                       | 20.0   | 24.9   | 27.5   | 38.5   | 32.8   | 40.0   | 1.55 | 1.0E-01 |
| B035DRAFT_02298 | Zn-ribbon protein, possibly nucleic acid-binding                                           | 1.7    | 2.9    | 2.7    | 2.5    | 4.0    | 1.1    | 0.96 | 9.6E-01 |
| B035DRAFT_02299 | hypothetical protein                                                                       | 5.1    | 4.9    | 3.2    | 7.1    | 4.9    | 1.6    | 0.88 | 9.0E-01 |

|                 |                                                                                            |        |        |        |        |        |        |  |      |         |
|-----------------|--------------------------------------------------------------------------------------------|--------|--------|--------|--------|--------|--------|--|------|---------|
| B035DRAFT_02300 | hypothetical protein                                                                       | 21.1   | 22.1   | 24.0   | 27.3   | 28.0   | 34.4   |  | 1.33 | 1.3E-01 |
| B035DRAFT_02301 | hypothetical protein                                                                       | 5.1    | 14.5   | 11.6   | 6.9    | 13.9   | 14.6   |  | 1.18 | 8.3E-01 |
| B035DRAFT_02302 | hypothetical protein                                                                       | 11.3   | 7.1    | 8.2    | 0.7    | 3.9    | 2.8    |  | 0.23 | 1.8E-01 |
| B035DRAFT_02303 | Peptidylarginine deiminase and related enzymes                                             | 107.0  | 105.5  | 98.7   | 127.6  | 133.0  | 133.2  |  | 1.27 | 2.2E-02 |
| B035DRAFT_02304 | Predicted amidohydrolase( EC:3.5.1.53 )                                                    | 146.7  | 141.1  | 143.2  | 148.5  | 153.9  | 157.3  |  | 1.07 | 1.5E-01 |
| B035DRAFT_02305 | hypothetical protein                                                                       | 1380.0 | 1409.8 | 1481.3 | 1487.9 | 856.6  | 873.3  |  | 0.73 | 3.5E-01 |
| B035DRAFT_02306 | aspartyl-tRNA synthetase, bacterial type( EC:6.1.1.12 )                                    | 712.0  | 680.7  | 667.2  | 585.9  | 657.5  | 620.3  |  | 0.90 | 2.0E-01 |
| B035DRAFT_02307 | Thioredoxin.                                                                               | 552.3  | 451.6  | 418.0  | 532.3  | 503.2  | 460.6  |  | 1.06 | 7.5E-01 |
| B035DRAFT_02308 | hypothetical protein                                                                       | 390.3  | 268.6  | 251.6  | 409.8  | 361.7  | 169.4  |  | 0.98 | 9.8E-01 |
| B035DRAFT_02309 | hypothetical protein                                                                       | 1.6    | 4.7    | 6.9    | 2.5    | 5.8    | 4.4    |  | 1.08 | 9.4E-01 |
| B035DRAFT_02310 | Predicted DNA-binding proteins                                                             | 67.5   | 63.0   | 49.8   | 70.3   | 58.6   | 66.2   |  | 1.09 | 6.6E-01 |
| B035DRAFT_02311 | hypothetical protein                                                                       | 133.6  | 128.7  | 123.1  | 101.5  | 106.8  | 124.5  |  | 0.86 | 2.5E-01 |
| B035DRAFT_02312 | Resolvase, N terminal domain.                                                              | 42.2   | 47.3   | 49.5   | 39.5   | 29.8   | 48.3   |  | 0.83 | 4.9E-01 |
| B035DRAFT_02313 | hypothetical protein                                                                       | 3.8    | 2.5    | 3.1    | 5.8    | 3.9    | 5.4    |  | 1.60 | 2.0E-01 |
| B035DRAFT_02314 | ( rRNA )                                                                                   | 6.5    | 11.9   | 7.7    | 4.1    | 7.9    | 9.3    |  |      | 6.9E-01 |
| B035DRAFT_02315 | ABC-type multidrug transport system, ATPase component                                      | 258.9  | 287.4  | 268.2  | 416.2  | 416.9  | 548.3  |  | 1.68 | 5.5E-02 |
| B035DRAFT_02316 | hypothetical protein                                                                       | 196.8  | 194.2  | 208.5  | 242.8  | 274.2  | 359.4  |  | 1.44 | 1.5E-01 |
| B035DRAFT_02317 | Predicted transcriptional regulators                                                       | 174.5  | 149.7  | 167.4  | 196.3  | 188.3  | 255.5  |  | 1.29 | 2.3E-01 |
| B035DRAFT_02318 | putative efflux protein, MATE family                                                       | 94.3   | 90.6   | 88.2   | 47.6   | 62.0   | 50.8   |  | 0.58 | 3.6E-02 |
| B035DRAFT_02319 | adenylosuccinate lyase( EC:4.3.2.2 )                                                       | 1085.5 | 1076.7 | 1041.0 | 985.5  | 1027.7 | 1068.6 |  | 0.96 | 4.2E-01 |
| B035DRAFT_02320 | pseudouridine synthase( EC:5.4.99.22 )                                                     | 1135.9 | 1001.1 | 1007.8 | 947.7  | 977.1  | 873.3  |  | 0.89 | 2.6E-01 |
| B035DRAFT_02321 | asparaginyl-tRNA synthetase( EC:6.1.1.22 )                                                 | 1087.5 | 1110.9 | 1069.9 | 896.1  | 936.0  | 962.6  |  | 0.85 | 3.5E-02 |
| B035DRAFT_02322 | hypothetical protein                                                                       | 154.9  | 141.2  | 151.2  | 148.0  | 192.4  | 272.9  |  | 1.33 | 3.9E-01 |
| B035DRAFT_02323 | Uncharacterized protein conserved in bacteria                                              | 250.5  | 224.0  | 234.1  | 255.9  | 262.4  | 255.9  |  | 1.09 | 2.0E-01 |
| B035DRAFT_02324 | hypothetical protein                                                                       | 108.9  | 121.4  | 123.5  | 108.4  | 110.1  | 99.7   |  | 0.90 | 2.8E-01 |
| B035DRAFT_02325 | ribosomal protein L13, bacterial type                                                      | 3791.6 | 3991.4 | 3641.7 | 3175.8 | 3251.5 | 3226.3 |  | 0.85 | 4.2E-02 |
| B035DRAFT_02326 | Ribosomal protein S9                                                                       | 2624.6 | 2835.3 | 2846.9 | 2313.6 | 2350.7 | 2657.9 |  | 0.88 | 2.2E-01 |
| B035DRAFT_02327 | ribosomal protein S2, bacterial type                                                       | 3643.4 | 3755.8 | 3794.8 | 3010.8 | 3291.4 | 3403.2 |  | 0.87 | 1.1E-01 |
| B035DRAFT_02328 | translation elongation factor Ts                                                           | 3552.3 | 3569.0 | 3429.0 | 3029.0 | 3347.8 | 3187.7 |  | 0.91 | 1.5E-01 |
| B035DRAFT_02329 | Translation initiation factor 1 (eIF-1/SUI1) and related proteins                          | 82.6   | 89.6   | 73.6   | 75.8   | 68.6   | 65.9   |  | 0.86 | 2.6E-01 |
| B035DRAFT_02330 | AT-rich DNA-binding protein                                                                | 257.1  | 303.7  | 276.3  | 311.1  | 352.1  | 357.0  |  | 1.22 | 1.6E-01 |
| B035DRAFT_02331 | 2-keto-4-pentenoate hydratase/2-oxohepta-3-ene-1,7-dioic acid hydratase (catechol pathway) | 228.0  | 258.3  | 234.2  | 252.4  | 286.9  | 245.9  |  | 1.09 | 4.4E-01 |
| B035DRAFT_02332 | 2-C-methyl-D-erythritol 2,4-cyclodiphosphate synthase( EC:4.6.1.12 )                       | 254.6  | 275.8  | 303.8  | 289.3  | 292.5  | 184.4  |  | 0.90 | 7.3E-01 |
| B035DRAFT_02333 | 1,4-dihydroxy-2-naphthoate octaprenyltransferase( EC:2.5.1.-,EC:2.5.1.74 )                 | 69.8   | 75.6   | 76.1   | 67.3   | 77.7   | 66.9   |  | 0.95 | 6.5E-01 |
| B035DRAFT_02334 | Predicted phosphohydrolases                                                                | 30.0   | 29.9   | 26.4   | 30.1   | 34.3   | 24.7   |  | 1.03 | 9.1E-01 |
| B035DRAFT_02335 | hypothetical protein                                                                       | 20.7   | 29.3   | 34.3   | 49.9   | 28.2   | 41.7   |  | 1.41 | 4.0E-01 |
| B035DRAFT_02336 | hypothetical protein                                                                       | 75.0   | 64.3   | 75.3   | 70.6   | 71.1   | 67.0   |  | 0.97 | 8.1E-01 |
| B035DRAFT_02337 | Predicted nucleotidyltransferases                                                          | 115.7  | 115.2  | 104.0  | 210.2  | 185.3  | 171.5  |  | 1.69 | 2.5E-02 |
| B035DRAFT_02338 | HEPN domain.                                                                               | 123.9  | 132.0  | 99.4   | 184.7  | 176.1  | 227.7  |  | 1.66 | 8.2E-02 |
| B035DRAFT_02339 | nicotinate (nicotinamide) nucleotide adenylyltransferase( EC:2.7.7.18 )                    | 195.0  | 263.2  | 244.8  | 248.8  | 232.6  | 237.5  |  | 1.03 | 8.7E-01 |
| B035DRAFT_02340 | hypothetical protein                                                                       | 303.0  | 307.5  | 253.4  | 239.9  | 250.4  | 276.2  |  | 0.89 | 3.9E-01 |
| B035DRAFT_02341 | guanylate kinase( EC:2.7.4.8 )                                                             | 270.6  | 272.8  | 244.1  | 222.4  | 249.3  | 204.2  |  | 0.86 | 2.5E-01 |
| B035DRAFT_02342 | TIGR00255 family protein                                                                   | 202.6  | 196.6  | 178.7  | 158.9  | 173.3  | 168.5  |  | 0.87 | 1.5E-01 |
| B035DRAFT_02343 | universal bacterial protein YeaZ                                                           | 231.1  | 241.4  | 246.4  | 287.0  | 259.5  | 186.8  |  | 1.00 | 9.9E-01 |
| B035DRAFT_02344 | hypothetical protein                                                                       | 342.7  | 370.7  | 324.1  | 358.5  | 382.6  | 396.4  |  | 1.10 | 3.2E-01 |
| B035DRAFT_02345 | UDP-N-acetylglucosamine 1-carboxyvinyltransferase( EC:2.5.1.7 )                            | 501.8  | 455.8  | 451.0  | 494.8  | 504.4  | 410.7  |  | 1.00 | 9.9E-01 |
| B035DRAFT_02346 | 16S rRNA processing protein RimM                                                           | 222.4  | 214.7  | 191.3  | 184.1  | 229.0  | 208.8  |  | 0.99 | 9.4E-01 |
| B035DRAFT_02347 | Membrane proteins related to metalloendopeptidases                                         | 184.1  | 181.0  | 184.5  | 161.0  | 179.0  | 170.9  |  | 0.93 | 2.3E-01 |
| B035DRAFT_02348 | 1-deoxy-D-xylulose 5-phosphate reductoisomerase( EC:1.1.1.267 )                            | 218.4  | 218.3  | 211.1  | 216.5  | 220.3  | 187.9  |  | 0.96 | 6.8E-01 |

|                 |                                                                                                            |        |        |        |        |        |        |  |      |         |
|-----------------|------------------------------------------------------------------------------------------------------------|--------|--------|--------|--------|--------|--------|--|------|---------|
| B035DRAFT_02349 | RIP metalloprotease RseP( EC:3.4.24.)                                                                      | 270.1  | 266.5  | 266.5  | 251.3  | 279.8  | 260.1  |  | 0.98 | 7.9E-01 |
| B035DRAFT_02350 | anaerobic ribonucleoside-triphosphate reductase activating protein( EC:1.97.1.4 )                          | 195.8  | 195.9  | 161.7  | 136.0  | 186.2  | 182.3  |  | 0.91 | 6.5E-01 |
| B035DRAFT_02351 | Oxygen-sensitive ribonucleoside-triphosphate reductase( EC:1.17.4.2 )                                      | 306.6  | 313.0  | 250.6  | 308.6  | 343.0  | 326.5  |  | 1.13 | 4.0E-01 |
| B035DRAFT_02353 | Predicted membrane protein, hemolysin III homolog                                                          | 74.8   | 78.7   | 63.7   | 59.8   | 65.4   | 59.8   |  | 0.85 | 2.6E-01 |
| B035DRAFT_02354 | tRNA nucleotidyltransferase/poly(A) polymerase( EC:2.7.7.19 )                                              | 170.2  | 173.1  | 165.7  | 171.3  | 159.6  | 132.4  |  | 0.91 | 4.8E-01 |
| B035DRAFT_02355 | hypothetical protein                                                                                       | 235.1  | 278.3  | 265.4  | 295.2  | 355.8  | 527.1  |  | 1.47 | 2.7E-01 |
| B035DRAFT_02356 | hypothetical protein                                                                                       | 64.8   | 60.7   | 68.8   | 87.3   | 91.6   | 81.5   |  | 1.34 | 4.4E-02 |
| B035DRAFT_02357 | Holliday junction DNA helicase, RuvA subunit( EC:3.6.4.12 )                                                | 182.3  | 168.3  | 170.6  | 162.3  | 160.9  | 173.4  |  | 0.95 | 4.4E-01 |
| B035DRAFT_02358 | diaminopimelate dehydrogenase( EC:1.4.1.16 )                                                               | 846.5  | 893.5  | 813.3  | 755.2  | 623.1  | 534.8  |  | 0.74 | 1.7E-01 |
| B035DRAFT_02359 | prolipoprotein diacylglycerol transferase                                                                  | 123.5  | 129.0  | 120.7  | 117.9  | 133.6  | 118.9  |  | 0.99 | 9.2E-01 |
| B035DRAFT_02360 | hypothetical protein                                                                                       | 58.3   | 64.6   | 61.9   | 57.0   | 63.2   | 60.1   |  | 0.98 | 7.6E-01 |
| B035DRAFT_02361 | hypothetical protein                                                                                       | 27.3   | 33.0   | 29.5   | 26.5   | 32.6   | 30.4   |  | 1.00 | 9.8E-01 |
| B035DRAFT_02362 | DNA-binding protein, histone-like, putative                                                                | 241.5  | 228.4  | 244.5  | 281.6  | 270.7  | 190.6  |  | 1.03 | 9.2E-01 |
| B035DRAFT_02363 | hypothetical protein                                                                                       | 59.4   | 60.0   | 55.6   | 58.7   | 54.3   | 56.7   |  | 0.97 | 6.1E-01 |
| B035DRAFT_02364 | Beta-fructosidases (levanase/invertase)( EC:3.2.1.65 ) (GH32)                                              | 127.9  | 115.6  | 114.8  | 93.3   | 106.4  | 88.2   |  | 0.80 | 1.4E-01 |
| B035DRAFT_02365 | Fucose permease                                                                                            | 166.9  | 146.0  | 173.7  | 133.3  | 120.7  | 141.2  |  | 0.81 | 1.7E-01 |
| B035DRAFT_02366 | Sugar kinases, ribokinase family( EC:2.7.1.4 )                                                             | 233.6  | 192.4  | 240.0  | 211.3  | 182.3  | 97.0   |  | 0.70 | 4.3E-01 |
| B035DRAFT_02367 | ABC-type sugar transport system, periplasmic component                                                     | 38.2   | 37.4   | 39.5   | 32.6   | 36.6   | 32.6   |  | 0.88 | 1.7E-01 |
| B035DRAFT_02368 | ACT domain-containing protein                                                                              | 135.5  | 163.9  | 158.6  | 134.7  | 128.9  | 178.2  |  | 0.96 | 8.5E-01 |
| B035DRAFT_02369 | Coenzyme F390 synthetase( EC:6.2.1.30 )                                                                    | 99.7   | 102.2  | 102.4  | 99.7   | 112.2  | 108.1  |  | 1.05 | 4.5E-01 |
| B035DRAFT_02370 | Protein of unknown function (DUF3256).                                                                     | 153.1  | 170.9  | 137.7  | 160.3  | 159.1  | 158.1  |  | 1.04 | 7.5E-01 |
| B035DRAFT_02371 | ribosomal protein L31                                                                                      | 4279.4 | 5093.9 | 4202.2 | 3483.3 | 3195.9 | 4509.3 |  | 0.82 | 3.7E-01 |
| B035DRAFT_02372 | fructose-1,6-bisphosphate aldolase, class II, various bacterial and amitochondriate protist( EC:4.1.2.13 ) | 2697.4 | 3086.3 | 3072.7 | 3249.3 | 3546.9 | 4410.3 |  | 1.26 | 2.5E-01 |
| B035DRAFT_02373 | AraC-type DNA-binding domain-containing proteins                                                           | 87.4   | 91.3   | 93.6   | 93.3   | 102.3  | 121.8  |  | 1.16 | 3.3E-01 |
| B035DRAFT_02374 | RND family efflux transporter, MFP subunit                                                                 | 282.6  | 239.8  | 257.3  | 336.7  | 315.2  | 224.6  |  | 1.11 | 6.7E-01 |
| B035DRAFT_02375 | The (Largely Gram-negative Bacterial) Hydrophobe/Amphiphile Efflux-1 (HAE1) Family                         | 309.0  | 273.8  | 302.5  | 365.1  | 361.2  | 347.2  |  | 1.21 | 6.8E-02 |
| B035DRAFT_02376 | efflux transporter, outer membrane factor (OMF) lipoprotein, NodT family                                   | 319.7  | 319.3  | 314.2  | 394.1  | 381.0  | 432.0  |  | 1.26 | 4.1E-02 |
| B035DRAFT_02377 | hypothetical protein                                                                                       | 88.6   | 100.8  | 102.0  | 89.8   | 96.9   | 131.6  |  | 1.08 | 7.4E-01 |
| B035DRAFT_02378 | Domain of unknown function (DUF3332).                                                                      | 447.4  | 509.1  | 468.5  | 480.0  | 528.5  | 553.7  |  | 1.10 | 3.8E-01 |
| B035DRAFT_02379 | Arabinose efflux permease                                                                                  | 127.4  | 134.5  | 123.1  | 96.9   | 116.6  | 149.7  |  | 0.93 | 7.6E-01 |
| B035DRAFT_02380 | hypothetical protein                                                                                       | 108.1  | 173.4  | 161.1  | 544.7  | 365.6  | 553.2  |  | 3.32 | 4.4E-02 |
| B035DRAFT_02381 | hypothetical protein                                                                                       | 79.1   | 89.2   | 80.9   | 104.1  | 120.7  | 113.8  |  | 1.36 | 5.5E-02 |
| B035DRAFT_02382 | yjeF C-terminal region, hydroxyethylthiazole kinase-related/yjeF N-terminal region                         | 75.2   | 66.9   | 69.6   | 59.9   | 61.0   | 66.1   |  | 0.88 | 1.9E-01 |
| B035DRAFT_02383 | TonB-linked outer membrane protein, SusC/RagA family                                                       | 404.8  | 416.5  | 380.0  | 132.2  | 200.5  | 217.2  |  | 0.45 | 6.1E-02 |
| B035DRAFT_02384 | SusD family                                                                                                | 495.5  | 465.2  | 421.8  | 152.8  | 233.0  | 275.0  |  | 0.47 | 8.6E-02 |
| B035DRAFT_02385 | F5/8 type C domain (CBM32)                                                                                 | 517.6  | 509.6  | 533.2  | 192.9  | 256.7  | 335.6  |  | 0.49 | 7.9E-02 |
| B035DRAFT_02386 | hypoxanthine phosphoribosyltransferase( EC:2.4.2.8 )                                                       | 124.6  | 136.4  | 124.8  | 105.3  | 104.9  | 96.1   |  | 0.79 | 5.4E-02 |
| B035DRAFT_02387 | Adenylate kinase and related kinases( EC:2.7.4.3 )                                                         | 618.8  | 766.3  | 691.3  | 567.3  | 562.5  | 508.0  |  | 0.79 | 1.4E-01 |
| B035DRAFT_02388 | Obg family GTPase CgtA                                                                                     | 309.8  | 321.3  | 285.9  | 338.8  | 363.1  | 319.8  |  | 1.11 | 2.7E-01 |
| B035DRAFT_02389 | uncharacterized protein, YfiH family                                                                       | 180.8  | 160.1  | 165.2  | 159.7  | 194.5  | 147.9  |  | 0.99 | 9.4E-01 |
| B035DRAFT_02390 | Uncharacterized conserved protein                                                                          | 172.0  | 156.8  | 152.6  | 161.7  | 198.6  | 142.6  |  | 1.04 | 8.6E-01 |
| B035DRAFT_02391 | Membrane proteins related to metalloendopeptidases                                                         | 142.7  | 130.9  | 110.7  | 115.7  | 153.4  | 132.1  |  | 1.04 | 8.5E-01 |
| B035DRAFT_02392 | hypothetical protein                                                                                       | 110.9  | 114.5  | 98.5   | 138.0  | 154.7  | 131.9  |  | 1.31 | 9.1E-02 |
| B035DRAFT_02393 | Opacity protein and related surface antigens                                                               | 439.7  | 512.2  | 477.1  | 396.4  | 414.3  | 426.5  |  | 0.87 | 1.7E-01 |
| B035DRAFT_02394 | AlCAR transformylase/IMP cyclohydrolase PurH (only IMP cyclohydrolase domain in Aful)( EC:2.1.2.3 )        | 105.3  | 118.4  | 107.0  | 108.9  | 123.6  | 123.6  |  | 1.08 | 4.7E-01 |
| B035DRAFT_02395 | hypothetical protein                                                                                       | 19.9   | 23.6   | 21.7   | 25.4   | 23.1   | 27.6   |  | 1.17 | 2.6E-01 |

|                 |                                                                                                                                                    |       |       |       |        |       |       |      |         |
|-----------------|----------------------------------------------------------------------------------------------------------------------------------------------------|-------|-------|-------|--------|-------|-------|------|---------|
| B035DRAFT_02396 | hypothetical protein                                                                                                                               | 0.0   | 0.0   | 0.0   | 0.0    | 0.0   | 0.0   | 0.00 |         |
| B035DRAFT_02397 | Predicted transcriptional regulators                                                                                                               | 110.4 | 133.0 | 122.5 | 158.7  | 126.2 | 118.9 | 1.10 | 6.2E-01 |
| B035DRAFT_02398 | hypothetical protein                                                                                                                               | 18.3  | 19.6  | 15.1  | 18.5   | 13.9  | 16.6  | 0.92 | 7.1E-01 |
| B035DRAFT_02399 | hypothetical protein                                                                                                                               | 16.7  | 17.0  | 18.3  | 14.5   | 18.9  | 21.6  | 1.05 | 8.5E-01 |
| B035DRAFT_02400 | Uncharacterized conserved protein                                                                                                                  | 20.1  | 20.6  | 17.8  | 10.5   | 14.2  | 14.0  | 0.65 | 9.9E-02 |
| B035DRAFT_02401 | Protein-tyrosine-phosphatase( EC:1.20.4.1 )                                                                                                        | 12.8  | 12.7  | 16.0  | 7.5    | 8.8   | 10.6  | 0.65 | 1.3E-01 |
| B035DRAFT_02402 | Predicted permeases                                                                                                                                | 19.2  | 25.3  | 22.9  | 8.6    | 10.0  | 13.9  | 0.48 | 7.6E-02 |
| B035DRAFT_02403 | RteC protein.                                                                                                                                      | 46.1  | 47.2  | 47.5  | 20.2   | 22.4  | 26.7  | 0.49 | 2.0E-02 |
| B035DRAFT_02404 | Site-specific recombinase XerD                                                                                                                     | 418.0 | 434.0 | 403.4 | 388.4  | 376.4 | 402.5 | 0.93 | 2.1E-01 |
| B035DRAFT_02405 | ( tRNA )                                                                                                                                           | 69.4  | 64.6  | 84.5  | 40.2   | 27.3  | 31.5  | 0.45 | 4.8E-02 |
| B035DRAFT_02406 | Predicted permease                                                                                                                                 | 21.4  | 25.1  | 24.6  | 20.8   | 25.2  | 30.9  | 1.07 | 7.7E-01 |
| B035DRAFT_02407 | Thymidine kinase( EC:2.7.1.21 )                                                                                                                    | 32.7  | 36.4  | 34.4  | 40.1   | 37.5  | 41.0  | 1.15 | 1.4E-01 |
| B035DRAFT_02408 | probable S-adenosylmethionine-dependent methyltransferase, YraL family( EC:2.1.1.198 )                                                             | 828.1 | 871.0 | 848.4 | 1022.2 | 890.8 | 745.8 | 1.04 | 8.5E-01 |
| B035DRAFT_02409 | hypothetical protein                                                                                                                               | 539.8 | 606.2 | 581.3 | 556.5  | 512.9 | 649.0 | 0.99 | 9.6E-01 |
| B035DRAFT_02410 | HAD superfamily (subfamily IA) hydrolase, TIGR02254                                                                                                | 126.8 | 145.1 | 123.3 | 125.3  | 115.0 | 145.3 | 0.97 | 8.7E-01 |
| B035DRAFT_02411 | SusD family                                                                                                                                        | 66.0  | 72.9  | 62.4  | 29.4   | 39.5  | 42.8  | 0.55 | 6.7E-02 |
| B035DRAFT_02412 | TonB-linked outer membrane protein, SusC/RagA family                                                                                               | 42.6  | 42.6  | 38.0  | 14.9   | 17.5  | 20.6  | 0.43 | 2.1E-02 |
| B035DRAFT_02413 | SusD family                                                                                                                                        | 257.6 | 284.2 | 237.1 | 76.9   | 120.3 | 157.8 | 0.44 | 1.1E-01 |
| B035DRAFT_02414 | TonB-linked outer membrane protein, SusC/RagA family                                                                                               | 188.0 | 204.5 | 179.5 | 54.8   | 74.0  | 95.6  | 0.38 | 4.6E-02 |
| B035DRAFT_02415 | SusD family                                                                                                                                        | 393.8 | 452.8 | 373.1 | 118.9  | 164.4 | 227.6 | 0.41 | 7.4E-02 |
| B035DRAFT_02416 | TonB-linked outer membrane protein, SusC/RagA family                                                                                               | 275.8 | 325.7 | 265.5 | 79.7   | 101.9 | 130.4 | 0.35 | 3.5E-02 |
| B035DRAFT_02417 | Predicted ATPase (AAA+ superfamily)                                                                                                                | 178.9 | 198.8 | 191.6 | 210.2  | 183.0 | 236.6 | 1.10 | 5.1E-01 |
| B035DRAFT_02418 | SusD family                                                                                                                                        | 57.7  | 63.4  | 51.5  | 28.1   | 31.5  | 43.0  | 0.59 | 1.1E-01 |
| B035DRAFT_02419 | TonB-linked outer membrane protein, SusC/RagA family                                                                                               | 36.8  | 43.9  | 40.7  | 18.2   | 19.7  | 23.8  | 0.51 | 2.9E-02 |
| B035DRAFT_02420 | hypothetical protein                                                                                                                               | 30.4  | 33.8  | 46.9  | 16.0   | 21.3  | 18.9  | 0.51 | 8.2E-02 |
| B035DRAFT_02421 | hypothetical protein                                                                                                                               | 42.1  | 38.4  | 53.6  | 25.2   | 29.3  | 28.2  | 0.62 | 8.2E-02 |
| B035DRAFT_02422 | Site-specific recombinase XerD                                                                                                                     | 95.8  | 89.0  | 90.2  | 70.6   | 56.6  | 71.3  | 0.72 | 8.6E-02 |
| B035DRAFT_02423 | TonB-linked outer membrane protein, SusC/RagA family                                                                                               | 64.9  | 73.3  | 65.0  | 23.1   | 28.6  | 35.3  | 0.42 | 3.5E-02 |
| B035DRAFT_02424 | SusD family                                                                                                                                        | 46.3  | 58.7  | 49.0  | 15.7   | 31.4  | 34.5  | 0.50 | 2.0E-01 |
| B035DRAFT_02425 | hypothetical protein                                                                                                                               | 51.3  | 56.7  | 47.7  | 20.7   | 28.3  | 39.1  | 0.55 | 1.5E-01 |
| B035DRAFT_02426 | Predicted Zn-dependent peptidases                                                                                                                  | 39.9  | 34.0  | 36.9  | 18.1   | 22.1  | 21.2  | 0.55 | 2.5E-02 |
| B035DRAFT_02427 | GTP-binding protein HflX                                                                                                                           | 167.5 | 159.1 | 155.7 | 146.2  | 162.2 | 139.7 | 0.93 | 4.1E-01 |
| B035DRAFT_02428 | Putative GTPases (G3E family)                                                                                                                      | 183.0 | 182.5 | 184.7 | 163.0  | 184.2 | 167.4 | 0.93 | 3.3E-01 |
| B035DRAFT_02429 | putative hydrolase, CocE/NonD family (CE7)                                                                                                         | 72.1  | 80.5  | 76.5  | 65.9   | 72.4  | 78.2  | 0.94 | 5.9E-01 |
| B035DRAFT_02430 | hydro-lyases, Fe-S type, tartrate/fumarate subfamily, alpha region/hydro-lyases, Fe-S type, tartrate/fumarate subfamily, beta region( EC:4.2.1.2 ) | 458.0 | 482.4 | 454.4 | 501.4  | 532.8 | 535.6 | 1.13 | 8.8E-02 |
| B035DRAFT_02431 | Amino acid transporters                                                                                                                            | 89.3  | 97.8  | 100.2 | 110.0  | 99.2  | 81.9  | 1.01 | 9.8E-01 |
| B035DRAFT_02432 | hypothetical protein                                                                                                                               | 128.4 | 141.3 | 165.4 | 187.2  | 146.9 | 132.9 | 1.07 | 7.8E-01 |
| B035DRAFT_02433 | Outer membrane protein                                                                                                                             | 63.2  | 58.0  | 55.6  | 76.1   | 84.0  | 68.7  | 1.29 | 1.1E-01 |
| B035DRAFT_02434 | Cation/multidrug efflux pump                                                                                                                       | 75.3  | 81.8  | 82.9  | 117.8  | 119.4 | 134.8 | 1.55 | 2.1E-02 |
| B035DRAFT_02435 | RND family efflux transporter, MFP subunit                                                                                                         | 86.3  | 83.1  | 87.9  | 169.2  | 174.8 | 174.7 | 2.02 | 1.6E-04 |
| B035DRAFT_02436 | Predicted aminopeptidases                                                                                                                          | 179.4 | 179.6 | 181.0 | 196.0  | 199.2 | 170.5 | 1.05 | 6.2E-01 |
| B035DRAFT_02437 | ribosome small subunit-dependent GTPase A( EC:3.6.1.)                                                                                              | 266.7 | 326.6 | 280.9 | 335.6  | 346.0 | 423.2 | 1.26 | 2.2E-01 |
| B035DRAFT_02438 | ribosome recycling factor                                                                                                                          | 348.7 | 332.9 | 230.8 | 417.1  | 440.5 | 394.1 | 1.39 | 2.2E-01 |
| B035DRAFT_02439 | Fructose-2,6-bisphosphatase( EC:5.4.2.1 )                                                                                                          | 10.8  | 17.1  | 14.3  | 22.1   | 16.9  | 29.5  | 1.61 | 2.5E-01 |
| B035DRAFT_02440 | uridylyate kinase( EC:2.7.4.22 )                                                                                                                   | 295.3 | 285.3 | 261.1 | 324.1  | 327.8 | 244.2 | 1.06 | 7.8E-01 |
| B035DRAFT_02441 | DNA-3-methyladenine glycosylase I( EC:3.2.2.20 )                                                                                                   | 31.8  | 31.5  | 34.9  | 34.3   | 34.1  | 34.9  | 1.05 | 4.0E-01 |
| B035DRAFT_02442 | putative efflux protein, MATE family                                                                                                               | 58.2  | 67.7  | 64.2  | 81.0   | 74.0  | 82.6  | 1.25 | 9.4E-02 |
| B035DRAFT_02443 | birA, biotin-[acetyl-CoA-carboxylase] ligase region( EC:6.3.4.15 )                                                                                 | 40.3  | 50.3  | 43.2  | 56.7   | 58.1  | 61.9  | 1.33 | 9.4E-02 |
| B035DRAFT_02444 | Uncharacterized protein conserved in bacteria                                                                                                      | 49.1  | 58.6  | 50.2  | 69.6   | 74.2  | 80.9  | 1.42 | 6.3E-02 |

|                 |                                                                                  |       |       |       |       |       |       |      |         |
|-----------------|----------------------------------------------------------------------------------|-------|-------|-------|-------|-------|-------|------|---------|
| B035DRAFT_02445 | Predicted endonuclease distantly related to archaeal Holliday junction resolvase | 62.8  | 74.6  | 68.0  | 100.1 | 78.2  | 61.7  | 1.15 | 6.0E-01 |
| B035DRAFT_02446 | hypothetical protein                                                             | 74.7  | 80.4  | 81.2  | 69.6  | 61.6  | 41.2  | 0.71 | 2.8E-01 |
| B035DRAFT_02447 | Cytosine/adenosine deaminases                                                    | 137.1 | 162.5 | 147.0 | 137.4 | 135.5 | 112.9 | 0.86 | 3.3E-01 |
| B035DRAFT_02448 | hypothetical protein                                                             | 230.5 | 259.8 | 256.2 | 229.7 | 198.9 | 272.4 | 0.93 | 7.0E-01 |
| B035DRAFT_02449 | Phosphatidylserine synthase( EC:2.7.8.8 )                                        | 252.7 | 325.3 | 289.8 | 248.9 | 248.9 | 281.9 | 0.90 | 5.0E-01 |
| B035DRAFT_02450 | phosphatidylserine decarboxylase precursor-related protein( EC:4.1.1.65 )        | 497.9 | 550.8 | 514.3 | 523.6 | 468.3 | 474.0 | 0.94 | 4.4E-01 |
| B035DRAFT_02451 | DNA-directed DNA polymerase III (polC)( EC:2.7.7.7 )                             | 214.7 | 195.1 | 212.3 | 240.6 | 241.3 | 194.3 | 1.08 | 5.7E-01 |
| B035DRAFT_02452 | thioredoxin                                                                      | 541.6 | 614.0 | 596.4 | 558.9 | 552.7 | 592.2 | 0.97 | 7.4E-01 |
| B035DRAFT_02453 | hypothetical protein                                                             | 774.7 | 847.4 | 797.7 | 736.2 | 789.3 | 854.0 | 0.98 | 8.6E-01 |
| B035DRAFT_02454 | hypothetical protein                                                             | 144.8 | 142.7 | 153.8 | 134.2 | 135.8 | 192.8 | 1.03 | 8.9E-01 |
| B035DRAFT_02455 | hypothetical protein                                                             | 59.3  | 61.3  | 56.9  | 51.1  | 51.9  | 64.0  | 0.94 | 6.3E-01 |
| B035DRAFT_02456 | Response regulator of the LytR/AlgR family                                       | 35.5  | 37.5  | 37.1  | 23.8  | 19.2  | 25.3  | 0.62 | 4.8E-02 |
| B035DRAFT_02457 | hypothetical protein                                                             | 55.5  | 59.1  | 53.3  | 34.6  | 34.7  | 43.4  | 0.67 | 6.3E-02 |
| B035DRAFT_02458 | ATPase, YjeE family                                                              | 163.4 | 166.4 | 142.8 | 110.2 | 140.2 | 113.9 | 0.77 | 1.7E-01 |
| B035DRAFT_02459 | ABC-type Mn2+/Zn2+ transport systems, permease components                        | 95.8  | 91.9  | 107.1 | 84.3  | 64.2  | 67.2  | 0.73 | 1.4E-01 |
| B035DRAFT_02460 | hypothetical protein                                                             | 167.3 | 119.7 | 138.5 | 155.4 | 118.1 | 68.4  | 0.77 | 5.8E-01 |
| B035DRAFT_02461 | 5-enolpyruvylshikimate-3-phosphate synthase( EC:2.5.1.19 )                       | 167.5 | 149.5 | 139.9 | 156.2 | 134.0 | 118.4 | 0.89 | 5.1E-01 |
| B035DRAFT_02462 | Dhna-type fructose-1,6-bisphosphate aldolase and related enzymes( EC:4.1.2.13 )  | 797.5 | 657.2 | 744.7 | 762.9 | 486.6 | 450.7 | 0.75 | 3.8E-01 |
| B035DRAFT_02463 | phosphoglycerate mutase, BPG-dependent, family 1( EC:5.4.2.1 )                   | 591.8 | 480.5 | 492.6 | 563.0 | 378.8 | 305.4 | 0.77 | 4.6E-01 |
| B035DRAFT_02464 | Nucleotidyltransferase/DNA polymerase involved in DNA repair( EC:2.7.7.7 )       | 60.6  | 54.7  | 62.3  | 48.6  | 45.3  | 38.9  | 0.75 | 1.1E-01 |
| B035DRAFT_02465 | Alpha-L-fucosidase (GH29)                                                        | 48.1  | 47.1  | 43.9  | 40.6  | 47.0  | 34.9  | 0.87 | 4.2E-01 |
| B035DRAFT_02466 | hypothetical protein                                                             | 49.8  | 46.4  | 42.4  | 34.6  | 40.5  | 42.9  | 0.85 | 2.9E-01 |
| B035DRAFT_02467 | hypothetical protein                                                             | 40.2  | 37.4  | 23.8  | 27.8  | 28.1  | 20.9  | 0.77 | 4.5E-01 |
| B035DRAFT_02468 | hypothetical protein                                                             | 0.0   | 0.0   | 0.0   | 0.0   | 0.0   | 0.0   | 0.00 |         |
| B035DRAFT_02469 | Site-specific recombinase XerD                                                   | 29.8  | 24.0  | 28.7  | 35.4  | 35.0  | 23.2  | 1.12 | 6.9E-01 |
| B035DRAFT_02470 | hypothetical protein                                                             | 20.1  | 24.9  | 22.8  | 12.7  | 13.4  | 19.5  | 0.66 | 1.8E-01 |
| B035DRAFT_02471 | hypothetical protein                                                             | 55.0  | 64.9  | 56.1  | 61.6  | 55.5  | 43.9  | 0.91 | 6.4E-01 |
| B035DRAFT_02472 | DNA binding domain, excisionase family                                           | 8.1   | 7.9   | 6.0   | 5.7   | 4.9   | 2.9   | 0.59 | 2.5E-01 |
| B035DRAFT_02473 | hypothetical protein                                                             | 6.8   | 5.0   | 6.2   | 6.8   | 5.7   | 3.5   | 0.87 | 7.2E-01 |
| B035DRAFT_02474 | hypothetical protein                                                             | 4.8   | 2.9   | 6.0   | 3.4   | 4.3   | 5.0   | 0.96 | 9.4E-01 |
| B035DRAFT_02475 | hypothetical protein                                                             | 7.8   | 5.1   | 9.1   | 6.3   | 2.0   | 1.7   | 0.39 | 2.8E-01 |
| B035DRAFT_02476 | hypothetical protein                                                             | 2.4   | 4.6   | 4.8   | 3.6   | 4.4   | 1.8   | 0.81 | 7.5E-01 |
| B035DRAFT_02477 | hypothetical protein                                                             | 5.4   | 8.3   | 6.5   | 5.2   | 8.9   | 5.3   | 0.94 | 8.9E-01 |
| B035DRAFT_02478 | hypothetical protein                                                             | 11.4  | 6.0   | 11.8  | 6.6   | 6.2   | 4.7   | 0.62 | 3.1E-01 |
| B035DRAFT_02479 | hypothetical protein                                                             | 2.6   | 2.2   | 3.0   | 2.0   | 1.4   | 0.6   | 0.46 | 2.6E-01 |
| B035DRAFT_02480 | hypothetical protein                                                             | 3.5   | 2.3   | 3.6   | 1.4   | 2.0   | 0.7   | 0.41 | 2.0E-01 |
| B035DRAFT_02481 | hypothetical protein                                                             | 3.3   | 1.9   | 1.4   | 1.0   | 2.5   | 0.6   | 0.56 | 5.1E-01 |
| B035DRAFT_02482 | hypothetical protein                                                             | 2.0   | 0.8   | 2.1   | 0.9   | 1.6   | 0.8   | 0.71 | 6.4E-01 |
| B035DRAFT_02483 | hypothetical protein                                                             | 3.4   | 2.6   | 1.5   | 2.2   | 2.6   | 0.3   | 0.49 | 6.1E-01 |
| B035DRAFT_02484 | hypothetical protein                                                             | 3.0   | 2.0   | 3.1   | 2.2   | 1.9   | 0.4   | 0.45 | 4.5E-01 |
| B035DRAFT_02485 | Bacteroides conjugative transposon TraK protein                                  | 4.4   | 1.6   | 3.3   | 3.2   | 3.0   | 2.5   | 1.00 | 1.0E+00 |
| B035DRAFT_02486 | hypothetical protein                                                             | 1.3   | 2.6   | 2.7   | 2.3   | 2.0   | 0.0   | 1.03 | 9.5E-01 |
| B035DRAFT_02487 | DNA N-6-adenine-methyltransferase (Dam).                                         | 1.7   | 1.6   | 3.4   | 1.8   | 1.9   | 0.3   | 0.49 | 5.3E-01 |
| B035DRAFT_02488 | Bacteroides conjugative transposon TraM protein                                  | 2.5   | 2.7   | 2.9   | 1.9   | 2.5   | 0.8   | 0.58 | 3.9E-01 |
| B035DRAFT_02489 | DNA modification methylase                                                       | 2.5   | 2.7   | 4.6   | 5.1   | 2.1   | 1.0   | 0.69 | 6.9E-01 |
| B035DRAFT_02490 | Bacteroides conjugative transposon TraN protein                                  | 1.8   | 3.7   | 2.9   | 1.7   | 2.0   | 2.0   | 0.70 | 3.8E-01 |
| B035DRAFT_02491 | hypothetical protein                                                             | 1.0   | 1.5   | 2.7   | 1.7   | 1.2   | 0.6   | 0.66 | 6.0E-01 |
| B035DRAFT_02492 | hypothetical protein                                                             | 4.9   | 2.4   | 5.0   | 4.1   | 1.6   | 1.4   | 0.54 | 4.2E-01 |

|                 |                                                                                          |        |        |        |        |        |        |      |         |
|-----------------|------------------------------------------------------------------------------------------|--------|--------|--------|--------|--------|--------|------|---------|
| B035DRAFT_02493 | Bacterial RNA polymerase, alpha chain C terminal domain.                                 | 33.3   | 26.4   | 34.1   | 29.8   | 23.5   | 22.8   | 0.81 | 3.4E-01 |
| B035DRAFT_02494 | Type IV secretory pathway, VirD4 components                                              | 25.6   | 15.9   | 21.2   | 13.7   | 15.3   | 10.5   | 0.63 | 2.1E-01 |
| B035DRAFT_02495 | Uncharacterized conserved protein                                                        | 226.1  | 223.5  | 203.2  | 245.6  | 224.8  | 199.1  | 1.02 | 8.7E-01 |
| B035DRAFT_02496 | hypothetical protein                                                                     | 2.9    | 2.0    | 3.6    | 3.7    | 3.2    | 0.5    | 0.67 | 7.3E-01 |
| B035DRAFT_02497 | hypothetical protein                                                                     | 3.6    | 1.0    | 4.4    | 1.4    | 3.7    | 0.8    | 0.64 | 6.9E-01 |
| B035DRAFT_02498 | hypothetical protein                                                                     | 0.0    | 4.3    | 1.5    | 0.7    | 0.6    | 2.2    | 0.37 | 4.5E-01 |
| B035DRAFT_02499 | hypothetical protein                                                                     | 1.8    | 3.6    | 1.5    | 1.9    | 3.3    | 0.6    | 0.72 | 7.6E-01 |
| B035DRAFT_02500 | ParB-like partition proteins                                                             | 12.0   | 10.7   | 13.6   | 11.3   | 12.3   | 9.2    | 0.90 | 6.1E-01 |
| B035DRAFT_02501 | hypothetical protein                                                                     | 39.7   | 33.9   | 36.3   | 46.7   | 48.6   | 39.1   | 1.22 | 2.2E-01 |
| B035DRAFT_02502 | ATPases involved in chromosome partitioning                                              | 50.3   | 51.2   | 38.3   | 59.3   | 55.7   | 37.6   | 1.08 | 8.2E-01 |
| B035DRAFT_02503 | Helicase conserved C-terminal domain./Type III restriction enzyme, res subunit.          | 2.7    | 2.1    | 2.5    | 2.0    | 2.2    | 1.3    | 0.75 | 3.6E-01 |
| B035DRAFT_02504 | hypothetical protein                                                                     | 7.7    | 5.3    | 4.9    | 3.4    | 2.7    | 3.6    | 0.55 | 1.2E-01 |
| B035DRAFT_02505 | hypothetical protein                                                                     | 4.5    | 4.4    | 3.7    | 2.4    | 2.0    | 2.7    | 0.57 | 5.7E-02 |
| B035DRAFT_02506 | hypothetical protein                                                                     | 377.1  | 361.2  | 331.8  | 401.6  | 414.3  | 475.0  | 1.20 | 1.7E-01 |
| B035DRAFT_02507 | Domain of unknown function (DUF1814).                                                    | 326.2  | 315.2  | 350.6  | 384.5  | 369.8  | 388.0  | 1.15 | 9.1E-02 |
| B035DRAFT_02508 | Predicted ATPases of PP-loop superfamily                                                 | 250.5  | 234.0  | 248.3  | 280.9  | 251.9  | 192.8  | 0.98 | 9.3E-01 |
| B035DRAFT_02509 | cob(I)alamin adenosyltransferase( EC:2.5.1.17 )                                          | 246.7  | 218.7  | 225.0  | 315.6  | 222.5  | 155.0  | 0.96 | 9.3E-01 |
| B035DRAFT_02510 | Membrane proteins related to metalloendopeptidases                                       | 52.2   | 48.3   | 50.9   | 56.0   | 48.9   | 34.0   | 0.90 | 7.0E-01 |
| B035DRAFT_02511 | hypothetical protein                                                                     | 17.4   | 11.4   | 20.0   | 11.7   | 10.9   | 2.2    | 0.42 | 4.0E-01 |
| B035DRAFT_02512 | hypothetical protein                                                                     | 15.8   | 13.1   | 11.9   | 7.1    | 13.6   | 5.5    | 0.60 | 3.4E-01 |
| B035DRAFT_02513 | hypothetical protein                                                                     | 22.4   | 15.7   | 20.6   | 12.8   | 13.6   | 3.2    | 0.43 | 3.5E-01 |
| B035DRAFT_02514 | hypothetical protein                                                                     | 18.7   | 14.3   | 19.8   | 11.4   | 13.1   | 5.1    | 0.52 | 2.9E-01 |
| B035DRAFT_02515 | Predicted membrane protein                                                               | 18.3   | 16.2   | 16.1   | 17.9   | 14.1   | 8.3    | 0.76 | 5.1E-01 |
| B035DRAFT_02516 | hypothetical protein                                                                     | 10.0   | 10.2   | 12.8   | 8.8    | 10.7   | 5.6    | 0.73 | 4.1E-01 |
| B035DRAFT_02517 | hypothetical protein                                                                     | 14.8   | 9.5    | 10.5   | 6.5    | 6.7    | 2.2    | 0.40 | 2.4E-01 |
| B035DRAFT_02518 | hypothetical protein                                                                     | 7.6    | 3.5    | 8.3    | 5.6    | 3.7    | 0.7    | 0.40 | 4.6E-01 |
| B035DRAFT_02519 | Membrane proteins related to metalloendopeptidases                                       | 12.4   | 12.1   | 13.9   | 11.3   | 12.0   | 2.6    | 0.55 | 5.1E-01 |
| B035DRAFT_02520 | hypothetical protein                                                                     | 16.3   | 9.3    | 13.5   | 9.3    | 9.3    | 2.0    | 0.44 | 4.0E-01 |
| B035DRAFT_02521 | Mismatch repair ATPase (MutS family)                                                     | 15.8   | 7.7    | 11.6   | 9.2    | 9.1    | 2.6    | 0.54 | 4.6E-01 |
| B035DRAFT_02522 | Muramidase (flagellum-specific) (GH73)                                                   | 17.4   | 11.9   | 14.7   | 13.6   | 12.2   | 3.1    | 0.55 | 5.1E-01 |
| B035DRAFT_02523 | hypothetical protein                                                                     | 24.8   | 4.4    | 17.4   | 9.0    | 7.8    | 0.9    | 0.32 | 4.9E-01 |
| B035DRAFT_02524 | hypothetical protein                                                                     | 18.3   | 10.6   | 21.6   | 13.1   | 11.8   | 3.0    | 0.48 | 4.4E-01 |
| B035DRAFT_02525 | Antirestriction protein                                                                  | 19.0   | 16.9   | 21.8   | 15.5   | 16.9   | 5.5    | 0.59 | 4.3E-01 |
| B035DRAFT_02526 | hypothetical protein                                                                     | 8.6    | 7.3    | 5.5    | 7.6    | 8.6    | 9.4    | 1.21 | 4.6E-01 |
| B035DRAFT_02527 | hypothetical protein                                                                     | 5.3    | 12.3   | 8.9    | 4.9    | 9.0    | 5.4    | 0.74 | 6.0E-01 |
| B035DRAFT_02528 | hypothetical protein                                                                     | 9.4    | 7.1    | 9.7    | 4.9    | 5.6    | 7.2    | 0.67 | 2.0E-01 |
| B035DRAFT_02529 | hypothetical protein                                                                     | 4.6    | 6.0    | 6.3    | 3.4    | 4.9    | 5.9    | 0.83 | 5.9E-01 |
| B035DRAFT_02531 | hypothetical protein                                                                     | 1085.0 | 1204.3 | 1096.3 | 1138.0 | 1442.8 | 1478.5 | 1.19 | 3.1E-01 |
| B035DRAFT_02532 | PKD domain (CBM44)                                                                       | 346.6  | 361.0  | 312.5  | 318.4  | 394.5  | 407.3  | 1.09 | 5.8E-01 |
| B035DRAFT_02533 | hypothetical protein                                                                     | 256.1  | 260.3  | 230.7  | 263.8  | 330.4  | 393.1  | 1.31 | 2.6E-01 |
| B035DRAFT_02534 | Glutamine cyclotransferase.                                                              | 228.8  | 212.5  | 217.0  | 268.7  | 296.5  | 198.6  | 1.14 | 5.4E-01 |
| B035DRAFT_02535 | Transposase and inactivated derivatives                                                  | 236.6  | 267.1  | 219.0  | 268.3  | 289.7  | 323.6  | 1.22 | 2.2E-01 |
| B035DRAFT_02536 | Outer membrane cobalamin receptor protein                                                | 212.1  | 187.6  | 202.8  | 225.7  | 232.1  | 122.1  | 0.93 | 8.5E-01 |
| B035DRAFT_02537 | ABC-type Fe3+-hydroxamate transport system, periplasmic component                        | 232.8  | 204.6  | 243.4  | 268.9  | 228.8  | 85.2   | 0.77 | 6.9E-01 |
| B035DRAFT_02538 | ABC-type Fe3+-siderophore transport system, permease component                           | 222.8  | 207.4  | 307.2  | 294.7  | 195.0  | 64.6   | 0.64 | 6.0E-01 |
| B035DRAFT_02539 | ABC-type cobalamin/Fe3+-siderophores transport systems, ATPase components( EC:3.6.3.34 ) | 153.6  | 129.1  | 183.6  | 169.9  | 116.2  | 44.3   | 0.62 | 5.2E-01 |
| B035DRAFT_02540 | Predicted metal-binding protein                                                          | 63.7   | 81.2   | 70.2   | 84.9   | 64.4   | 66.6   | 1.00 | 1.0E+00 |
| B035DRAFT_02541 | Outer membrane protein and related peptidoglycan-associated (lipo)proteins               | 10.4   | 11.8   | 11.7   | 12.6   | 13.3   | 11.1   | 1.09 | 4.9E-01 |

|                 |                                                                                 |       |       |       |       |       |       |      |         |
|-----------------|---------------------------------------------------------------------------------|-------|-------|-------|-------|-------|-------|------|---------|
| B035DRAFT_02542 | Plasmid recombination enzyme.                                                   | 5.5   | 4.3   | 5.2   | 5.7   | 4.4   | 4.2   | 0.95 | 8.4E-01 |
| B035DRAFT_02543 | hypothetical protein                                                            | 5.0   | 3.3   | 5.3   | 3.8   | 4.9   | 3.6   | 0.92 | 8.0E-01 |
| B035DRAFT_02544 | hypothetical protein                                                            | 4.0   | 4.7   | 2.4   | 3.0   | 3.9   | 1.6   | 0.74 | 6.2E-01 |
| B035DRAFT_02545 | hypothetical protein                                                            | 3.8   | 5.4   | 2.0   | 4.0   | 6.9   | 3.1   | 1.26 | 7.4E-01 |
| B035DRAFT_02546 | hypothetical protein                                                            | 5.3   | 4.0   | 6.4   | 2.0   | 4.8   | 3.8   | 0.64 | 4.2E-01 |
| B035DRAFT_02547 | hypothetical protein                                                            | 12.1  | 8.2   | 10.0  | 6.3   | 5.3   | 4.4   | 0.53 | 8.5E-02 |
| B035DRAFT_02548 | Resolvase, N terminal domain.                                                   | 49.4  | 50.1  | 41.3  | 53.8  | 53.0  | 32.9  | 0.97 | 9.3E-01 |
| B035DRAFT_02549 | hypothetical protein                                                            | 70.8  | 59.8  | 47.0  | 39.0  | 61.3  | 30.7  | 0.72 | 4.4E-01 |
| B035DRAFT_02550 | Bacterial nucleoid DNA-binding protein                                          | 84.5  | 110.7 | 87.5  | 123.6 | 126.0 | 102.9 | 1.25 | 2.8E-01 |
| B035DRAFT_02551 | Single-stranded DNA-binding protein                                             | 118.8 | 78.9  | 110.6 | 96.1  | 94.4  | 54.8  | 0.78 | 5.4E-01 |
| B035DRAFT_02552 | hypothetical protein                                                            | 41.9  | 29.7  | 31.1  | 41.4  | 33.2  | 32.1  | 1.05 | 8.7E-01 |
| B035DRAFT_02553 | hypothetical protein                                                            | 23.5  | 20.7  | 21.1  | 34.6  | 17.4  | 24.3  | 1.13 | 7.5E-01 |
| B035DRAFT_02554 | hypothetical protein                                                            | 23.9  | 15.5  | 26.7  | 11.1  | 15.6  | 21.7  | 0.72 | 4.8E-01 |
| B035DRAFT_02555 | hypothetical protein                                                            | 27.0  | 22.0  | 28.7  | 18.1  | 22.4  | 23.0  | 0.82 | 3.3E-01 |
| B035DRAFT_02556 | hypothetical protein                                                            | 1.1   | 2.6   | 2.0   | 1.7   | 1.2   | 3.7   | 1.13 | 8.8E-01 |
| B035DRAFT_02557 | Antirestriction protein                                                         | 4.4   | 5.6   | 6.5   | 6.1   | 7.5   | 7.3   | 1.28 | 3.2E-01 |
| B035DRAFT_02558 | hypothetical protein                                                            | 32.4  | 33.2  | 33.2  | 31.4  | 46.5  | 74.9  | 1.45 | 4.2E-01 |
| B035DRAFT_02559 | hypothetical protein                                                            | 29.7  | 34.5  | 22.8  | 18.1  | 26.9  | 54.0  | 1.04 | 9.6E-01 |
| B035DRAFT_02560 | hypothetical protein                                                            | 39.5  | 38.7  | 31.7  | 33.6  | 42.2  | 51.7  | 1.15 | 6.0E-01 |
| B035DRAFT_02561 | Superfamily II DNA helicase                                                     | 40.8  | 39.6  | 39.8  | 39.1  | 46.9  | 62.2  | 1.21 | 4.4E-01 |
| B035DRAFT_02562 | Domain of unknown function (DUF1848).                                           | 32.7  | 33.8  | 28.1  | 32.1  | 33.3  | 47.4  | 1.18 | 5.1E-01 |
| B035DRAFT_02563 | hypothetical protein                                                            | 42.5  | 39.6  | 35.5  | 52.5  | 53.3  | 59.3  | 1.41 | 5.8E-02 |
| B035DRAFT_02564 | Predicted ATPase (AAA+ superfamily)                                             | 37.6  | 42.2  | 41.4  | 57.9  | 63.5  | 63.3  | 1.52 | 1.8E-02 |
| B035DRAFT_02565 | hypothetical protein                                                            | 0.0   | 0.0   | 0.0   | 0.0   | 0.0   | 0.0   | 0.00 |         |
| B035DRAFT_02566 | Outer membrane protein and related peptidoglycan-associated (lipo)proteins      | 2.7   | 2.8   | 2.8   | 3.2   | 3.1   | 2.2   | 1.00 | 9.9E-01 |
| B035DRAFT_02567 | Plasmid recombination enzyme.                                                   | 1.9   | 1.9   | 2.0   | 2.8   | 2.9   | 1.3   | 1.15 | 7.9E-01 |
| B035DRAFT_02568 | hypothetical protein                                                            | 3.1   | 4.0   | 3.1   | 4.3   | 4.3   | 4.6   | 1.30 | 1.7E-01 |
| B035DRAFT_02569 | DNA binding domain, excisionase family                                          | 2.7   | 3.6   | 3.3   | 0.5   | 2.8   | 3.2   | 0.51 | 5.6E-01 |
| B035DRAFT_02570 | hypothetical protein                                                            | 1.7   | 2.5   | 2.4   | 1.4   | 2.4   | 2.2   | 0.88 | 7.3E-01 |
| B035DRAFT_02571 | Site-specific recombinase XerD                                                  | 5.3   | 3.5   | 3.0   | 5.6   | 5.0   | 4.4   | 1.30 | 4.4E-01 |
| B035DRAFT_02572 | DNA binding domain, excisionase family                                          | 3.8   | 4.7   | 1.6   | 3.0   | 2.4   | 3.8   | 0.99 | 9.9E-01 |
| B035DRAFT_02573 | Domain of unknown function (DUF1814).                                           | 58.8  | 66.7  | 55.1  | 57.5  | 61.5  | 66.0  | 1.03 | 8.5E-01 |
| B035DRAFT_02574 | hypothetical protein                                                            | 54.2  | 65.7  | 60.7  | 57.1  | 56.0  | 61.2  | 0.97 | 7.8E-01 |
| B035DRAFT_02575 | single stranded DNA-binding protein (ssb)                                       | 8.9   | 4.7   | 8.2   | 4.2   | 2.4   | 1.6   | 0.37 | 1.7E-01 |
| B035DRAFT_02576 | hypothetical protein                                                            | 2.9   | 1.1   | 0.0   | 0.0   | 1.3   | 0.9   | 0.60 | 6.2E-01 |
| B035DRAFT_02577 | hypothetical protein                                                            | 3.2   | 2.0   | 3.8   | 1.8   | 1.6   | 1.6   | 0.57 | 1.8E-01 |
| B035DRAFT_02578 | ATPases involved in chromosome partitioning                                     | 4.0   | 3.4   | 3.8   | 2.1   | 3.3   | 2.7   | 0.70 | 2.0E-01 |
| B035DRAFT_02579 | hypothetical protein                                                            | 6.8   | 1.1   | 4.7   | 4.1   | 4.4   | 0.9   | 0.76 | 8.5E-01 |
| B035DRAFT_02580 | hypothetical protein                                                            | 8.2   | 7.7   | 15.2  | 8.0   | 8.1   | 8.1   | 0.81 | 6.0E-01 |
| B035DRAFT_02581 | hypothetical protein                                                            | 1.1   | 2.5   | 1.3   | 2.0   | 1.0   | 1.2   | 0.88 | 8.4E-01 |
| B035DRAFT_02582 | hypothetical protein                                                            | 4.1   | 4.0   | 4.2   | 1.1   | 5.0   | 2.5   | 0.58 | 5.0E-01 |
| B035DRAFT_02583 | hypothetical protein                                                            | 0.9   | 0.7   | 3.2   | 2.1   | 1.8   | 2.4   | 1.71 | 5.4E-01 |
| B035DRAFT_02584 | Uncharacterized protein conserved in bacteria                                   | 0.7   | 2.0   | 0.4   | 1.1   | 2.2   | 0.6   | 1.37 | 7.8E-01 |
| B035DRAFT_02585 | hypothetical protein                                                            | 1.5   | 1.7   | 0.0   | 1.6   | 0.0   | 1.3   | 0.91 | 6.5E-01 |
| B035DRAFT_02586 | hypothetical protein                                                            | 6.6   | 5.6   | 5.3   | 6.5   | 4.9   | 4.3   | 0.89 | 6.4E-01 |
| B035DRAFT_02587 | Nucleotidyltransferase/DNA polymerase involved in DNA repair                    | 16.0  | 14.6  | 16.5  | 17.3  | 17.5  | 14.6  | 1.05 | 7.3E-01 |
| B035DRAFT_02588 | Protein of unknown function (DUF2958).                                          | 3.5   | 4.1   | 3.2   | 4.1   | 3.6   | 2.0   | 0.86 | 7.4E-01 |
| B035DRAFT_02589 | hypothetical protein                                                            | 3.7   | 3.3   | 4.9   | 4.3   | 2.8   | 2.8   | 0.83 | 5.7E-01 |
| B035DRAFT_02590 | Protein of unknown function (DUF1653)/Uncharacterised protein family (UPF0227). | 20.5  | 18.9  | 17.7  | 22.0  | 28.1  | 23.2  | 1.28 | 1.7E-01 |

|                 |                                                            |       |       |       |       |       |       |      |         |
|-----------------|------------------------------------------------------------|-------|-------|-------|-------|-------|-------|------|---------|
| B035DRAFT_02591 | Resolvase, N terminal domain.                              | 14.4  | 8.4   | 11.6  | 11.6  | 14.5  | 13.1  | 1.16 | 6.2E-01 |
| B035DRAFT_02592 | hypothetical protein                                       | 0.0   | 0.0   | 2.2   | 0.0   | 0.0   | 0.0   | 0.00 |         |
| B035DRAFT_02593 | hypothetical protein                                       | 2.2   | 2.3   | 1.8   | 2.0   | 1.9   | 2.2   | 0.97 | 8.5E-01 |
| B035DRAFT_02594 | hypothetical protein                                       | 1.5   | 1.7   | 2.3   | 2.3   | 1.7   | 2.4   | 1.17 | 6.0E-01 |
| B035DRAFT_02595 | hypothetical protein                                       | 0.9   | 2.7   | 1.1   | 0.5   | 2.1   | 4.2   | 1.15 | 9.2E-01 |
| B035DRAFT_02596 | hypothetical protein                                       | 5.5   | 5.0   | 5.3   | 1.2   | 1.4   | 4.3   | 0.37 | 2.2E-01 |
| B035DRAFT_02597 | hypothetical protein                                       | 7.8   | 7.5   | 9.5   | 6.1   | 4.6   | 5.5   | 0.65 | 1.0E-01 |
| B035DRAFT_02598 | hypothetical protein                                       | 6.6   | 5.8   | 5.8   | 3.5   | 3.7   | 3.2   | 0.57 | 1.7E-02 |
| B035DRAFT_02599 | Site-specific recombinase XerD                             | 19.8  | 25.4  | 22.7  | 24.2  | 25.3  | 22.8  | 1.07 | 6.4E-01 |
| B035DRAFT_02600 | Site-specific recombinase XerD                             | 18.4  | 20.3  | 20.1  | 16.7  | 17.9  | 19.2  | 0.91 | 3.5E-01 |
| B035DRAFT_02601 | hypothetical protein                                       | 21.8  | 23.2  | 22.0  | 17.6  | 20.9  | 17.1  | 0.83 | 1.8E-01 |
| B035DRAFT_02602 | hypothetical protein                                       | 18.1  | 15.1  | 16.9  | 14.2  | 17.9  | 15.3  | 0.94 | 7.1E-01 |
| B035DRAFT_02603 | DNA binding domain, excisionase family                     | 0.7   | 5.8   | 3.5   | 1.5   | 1.3   | 3.2   | 0.76 | 8.4E-01 |
| B035DRAFT_02604 | hypothetical protein                                       | 4.5   | 5.5   | 4.3   | 2.7   | 1.9   | 1.5   | 0.42 | 7.5E-02 |
| B035DRAFT_02605 | hypothetical protein                                       | 4.3   | 4.6   | 3.7   | 3.5   | 1.9   | 5.3   | 0.79 | 6.6E-01 |
| B035DRAFT_02606 | hypothetical protein                                       | 2.5   | 2.3   | 4.2   | 2.6   | 4.9   | 3.6   | 1.24 | 6.5E-01 |
| B035DRAFT_02607 | Bacterial mobilisation protein (MobC).                     | 6.5   | 3.4   | 3.5   | 3.0   | 4.6   | 3.9   | 0.89 | 8.1E-01 |
| B035DRAFT_02608 | Relaxase/Mobilisation nuclease domain.                     | 9.6   | 8.6   | 9.6   | 9.3   | 7.4   | 7.3   | 0.86 | 3.4E-01 |
| B035DRAFT_02609 | hypothetical protein                                       | 32.5  | 36.2  | 33.7  | 30.8  | 31.7  | 40.4  | 1.00 | 1.0E+00 |
| B035DRAFT_02610 | hypothetical protein( EC:3.6.4.12 )                        | 55.9  | 60.3  | 56.8  | 45.4  | 51.0  | 72.1  | 0.96 | 8.7E-01 |
| B035DRAFT_02611 | hypothetical protein                                       | 60.6  | 69.6  | 62.0  | 53.8  | 68.9  | 82.2  | 1.05 | 8.5E-01 |
| B035DRAFT_02612 | Restriction endonuclease( EC:3.1.21.5 )                    | 82.2  | 74.2  | 76.0  | 63.5  | 82.7  | 99.6  | 1.04 | 8.8E-01 |
| B035DRAFT_02613 | Adenine specific DNA methylase Mod( EC:2.1.1.72 )          | 96.6  | 93.6  | 92.5  | 88.6  | 104.1 | 122.2 | 1.10 | 5.6E-01 |
| B035DRAFT_02614 | hypothetical protein                                       | 57.8  | 60.6  | 50.7  | 48.0  | 53.7  | 70.3  | 1.01 | 9.8E-01 |
| B035DRAFT_02615 | hypothetical protein                                       | 56.9  | 61.6  | 48.3  | 42.7  | 58.8  | 77.6  | 1.05 | 9.0E-01 |
| B035DRAFT_02616 | Superfamily II DNA/RNA helicases, SNF2 family              | 84.3  | 83.2  | 83.3  | 82.7  | 90.7  | 110.9 | 1.13 | 4.6E-01 |
| B035DRAFT_02617 | Helix-turn-helix.                                          | 95.8  | 107.1 | 93.4  | 98.5  | 111.4 | 134.2 | 1.15 | 4.3E-01 |
| B035DRAFT_02618 | Virulence protein                                          | 131.4 | 115.6 | 119.2 | 83.4  | 96.7  | 93.8  | 0.75 | 6.6E-02 |
| B035DRAFT_02619 | DNA mismatch endonuclease Vsr( EC:3.1.)                    | 159.3 | 146.7 | 131.8 | 117.2 | 128.2 | 141.5 | 0.88 | 3.9E-01 |
| B035DRAFT_02620 | hypothetical protein                                       | 180.4 | 215.7 | 169.0 | 142.8 | 158.3 | 187.3 | 0.86 | 4.5E-01 |
| B035DRAFT_02621 | hypothetical protein                                       | 165.2 | 192.1 | 174.5 | 143.0 | 154.4 | 202.9 | 0.93 | 7.4E-01 |
| B035DRAFT_02622 | hypothetical protein                                       | 115.0 | 130.9 | 115.1 | 93.0  | 111.7 | 132.3 | 0.93 | 7.0E-01 |
| B035DRAFT_02623 | hypothetical protein                                       | 125.0 | 140.2 | 134.1 | 119.3 | 129.1 | 167.1 | 1.03 | 8.9E-01 |
| B035DRAFT_02624 | AlPR protein.                                              | 111.7 | 122.8 | 105.7 | 98.8  | 122.0 | 150.0 | 1.08 | 7.6E-01 |
| B035DRAFT_02625 | hypothetical protein                                       | 163.7 | 175.0 | 165.9 | 161.8 | 201.8 | 244.3 | 1.19 | 4.3E-01 |
| B035DRAFT_02626 | Type III restriction enzyme, res subunit./Z1 domain.       | 115.7 | 128.9 | 104.0 | 103.7 | 129.6 | 162.4 | 1.12 | 6.6E-01 |
| B035DRAFT_02627 | hypothetical protein                                       | 109.2 | 125.3 | 106.3 | 95.6  | 121.3 | 147.4 | 1.05 | 8.4E-01 |
| B035DRAFT_02628 | DNA-methyltransferase (dcm)( EC:2.1.1.37 )                 | 143.4 | 157.9 | 138.0 | 135.6 | 179.1 | 197.2 | 1.15 | 5.1E-01 |
| B035DRAFT_02629 | Predicted transcriptional regulators                       | 109.7 | 109.7 | 100.6 | 96.2  | 137.2 | 143.6 | 1.16 | 5.2E-01 |
| B035DRAFT_02630 | hypothetical protein                                       | 56.3  | 49.8  | 44.3  | 50.5  | 68.5  | 60.8  | 1.19 | 4.0E-01 |
| B035DRAFT_02631 | HipA-like C-terminal domain./HipA-like N-terminal domain.  | 80.2  | 76.4  | 71.6  | 79.0  | 100.2 | 86.4  | 1.16 | 3.1E-01 |
| B035DRAFT_02632 | Helix-turn-helix.                                          | 53.7  | 59.9  | 51.2  | 57.6  | 59.2  | 74.6  | 1.16 | 4.0E-01 |
| B035DRAFT_02633 | Uncharacterized stress protein (general stress protein 26) | 144.4 | 146.8 | 143.4 | 175.2 | 194.7 | 239.4 | 1.39 | 1.2E-01 |
| B035DRAFT_02634 | hypothetical protein                                       | 0.0   | 0.0   | 0.0   | 0.0   | 0.0   | 0.0   | 0.00 |         |
| B035DRAFT_02635 | hypothetical protein                                       | 0.0   | 0.0   | 0.0   | 0.0   | 0.0   | 0.0   | 0.00 |         |
| B035DRAFT_02636 | hypothetical protein                                       | 110.6 | 152.3 | 166.9 | 284.5 | 219.0 | 197.3 | 1.64 | 1.7E-01 |
| B035DRAFT_02637 | hypothetical protein                                       | 34.7  | 39.8  | 44.2  | 41.0  | 51.0  | 48.8  | 1.19 | 3.4E-01 |
| B035DRAFT_02638 | hypothetical protein                                       | 43.4  | 41.7  | 53.3  | 57.9  | 57.8  | 49.2  | 1.19 | 3.2E-01 |
| B035DRAFT_02639 | hypothetical protein                                       | 58.8  | 55.1  | 65.9  | 74.1  | 80.2  | 52.1  | 1.13 | 6.4E-01 |
| B035DRAFT_02640 | hypothetical protein                                       | 75.7  | 76.1  | 81.5  | 95.2  | 93.5  | 84.0  | 1.17 | 1.3E-01 |
| B035DRAFT_02641 | hypothetical protein                                       | 154.5 | 141.6 | 145.0 | 170.1 | 153.1 | 109.3 | 0.96 | 8.9E-01 |



|                 |                                                                                                     |         |         |         |         |         |         |  |      |         |
|-----------------|-----------------------------------------------------------------------------------------------------|---------|---------|---------|---------|---------|---------|--|------|---------|
| B035DRAFT_02642 | conserved hypothetical protein, YceG family                                                         | 102.8   | 108.7   | 116.4   | 122.3   | 112.1   | 99.2    |  | 1.02 | 9.2E-01 |
| B035DRAFT_02643 | 4Fe-4S binding domain.                                                                              | 284.2   | 317.7   | 300.5   | 382.5   | 398.9   | 394.7   |  | 1.30 | 2.5E-02 |
| B035DRAFT_02644 | ( miscRNA )                                                                                         | 32616.5 | 45027.0 | 67728.3 | 93949.3 | 50708.4 | 20323.9 |  | 0.99 | 9.9E-01 |
| B035DRAFT_02645 | ribosomal protein L20                                                                               | 2789.4  | 3380.1  | 3274.8  | 3292.6  | 3135.8  | 3837.6  |  | 1.09 | 5.9E-01 |
| B035DRAFT_02646 | ribosomal protein L35                                                                               | 2742.9  | 3637.7  | 3605.5  | 3117.3  | 2976.7  | 3821.0  |  | 1.00 | 9.9E-01 |
| B035DRAFT_02647 | translation initiation factor IF-3                                                                  | 1418.9  | 1622.6  | 1560.0  | 1256.6  | 1181.0  | 1336.7  |  | 0.82 | 1.1E-01 |
| B035DRAFT_02648 | threonyl-tRNA synthetase( EC:6.1.1.3 )                                                              | 733.1   | 717.8   | 695.3   | 726.3   | 807.5   | 771.3   |  | 1.07 | 2.9E-01 |
| B035DRAFT_02649 | Tetratricopeptide repeat.                                                                           | 478.2   | 485.6   | 493.4   | 560.6   | 574.5   | 571.1   |  | 1.17 | 5.3E-03 |
| B035DRAFT_02650 | peptide deformylase( EC:3.5.1.88 )                                                                  | 328.4   | 370.4   | 375.6   | 465.2   | 448.3   | 394.7   |  | 1.22 | 1.6E-01 |
| B035DRAFT_02651 | RNAse H-fold protein YggF( EC:3.1.)                                                                 | 218.2   | 262.7   | 209.4   | 329.3   | 324.7   | 316.3   |  | 1.41 | 6.7E-02 |
| B035DRAFT_02652 | hypothetical protein (CBM60)                                                                        | 115.4   | 113.3   | 98.1    | 124.5   | 147.7   | 138.8   |  | 1.26 | 1.5E-01 |
| B035DRAFT_02653 | Cell division protein                                                                               | 1058.0  | 1133.1  | 1187.0  | 1264.3  | 1141.9  | 976.6   |  | 1.00 | 9.9E-01 |
| B035DRAFT_02654 | hypothetical protein                                                                                | 2150.8  | 2348.4  | 2157.3  | 2796.7  | 2409.0  | 2227.6  |  | 1.11 | 4.2E-01 |
| B035DRAFT_02655 | Protein of unknown function (DUF1469).                                                              | 475.5   | 506.0   | 492.3   | 437.8   | 406.6   | 596.5   |  | 0.96 | 8.8E-01 |
| B035DRAFT_02656 | hypothetical protein                                                                                | 425.2   | 463.3   | 421.1   | 399.6   | 359.0   | 479.5   |  | 0.94 | 7.1E-01 |
| B035DRAFT_02657 | Periplasmic protease (PL22)                                                                         | 427.7   | 419.4   | 408.5   | 299.6   | 302.8   | 309.0   |  | 0.73 | 1.4E-03 |
| B035DRAFT_02658 | Transcriptional regulators                                                                          | 50.5    | 45.1    | 48.1    | 50.0    | 42.1    | 54.2    |  | 1.01 | 9.3E-01 |
| B035DRAFT_02659 | OAH/OAS sulfhydrylase( EC:2.5.1.49 )                                                                | 59.5    | 66.4    | 67.2    | 50.6    | 43.1    | 47.2    |  | 0.73 | 6.0E-02 |
| B035DRAFT_02660 | Predicted membrane protein-associated, metal-dependent hydrolase                                    | 195.4   | 186.8   | 200.2   | 167.7   | 119.7   | 136.0   |  | 0.72 | 1.4E-01 |
| B035DRAFT_02661 | Outer membrane protein/protective antigen OMA87                                                     | 241.2   | 255.3   | 257.6   | 225.2   | 175.4   | 203.4   |  | 0.80 | 1.6E-01 |
| B035DRAFT_02662 | Outer membrane protein                                                                              | 430.9   | 401.5   | 445.0   | 546.1   | 351.4   | 379.2   |  | 0.98 | 9.5E-01 |
| B035DRAFT_02663 | Cation/multidrug efflux pump                                                                        | 81.7    | 64.0    | 67.2    | 121.1   | 132.7   | 128.4   |  | 1.80 | 2.7E-02 |
| B035DRAFT_02664 | RND family efflux transporter, MFP subunit                                                          | 32.3    | 26.3    | 30.0    | 52.6    | 53.2    | 45.1    |  | 1.70 | 3.5E-02 |
| B035DRAFT_02665 | AraC-type DNA-binding domain-containing proteins                                                    | 50.9    | 55.2    | 55.5    | 50.2    | 54.9    | 57.1    |  | 1.00 | 9.8E-01 |
| B035DRAFT_02666 | hypothetical protein                                                                                | 222.2   | 189.4   | 199.3   | 154.5   | 162.4   | 152.4   |  | 0.77 | 6.1E-02 |
| B035DRAFT_02667 | Uncharacterized conserved protein                                                                   | 269.6   | 248.3   | 247.6   | 211.7   | 223.9   | 256.4   |  | 0.90 | 3.8E-01 |
| B035DRAFT_02668 | hypothetical protein                                                                                | 302.7   | 321.8   | 249.8   | 209.9   | 120.2   | 99.2    |  | 0.47 | 1.5E-01 |
| B035DRAFT_02669 | Gas vesicle protein                                                                                 | 853.7   | 699.7   | 702.5   | 1190.3  | 1034.3  | 706.4   |  | 1.28 | 4.3E-01 |
| B035DRAFT_02670 | ( miscRNA )                                                                                         | 366.8   | 413.8   | 395.0   | 343.0   | 310.6   | 310.3   |  | 0.82 | 9.0E-02 |
| B035DRAFT_02671 | tryptophan synthase, beta subunit( EC:4.2.1.20 )                                                    | 583.0   | 548.1   | 540.2   | 254.5   | 274.7   | 263.2   |  | 0.47 | 7.7E-04 |
| B035DRAFT_02672 | Anthranilate/para-aminobenzoate synthases component I( EC:4.1.3.27 )                                | 209.0   | 189.1   | 200.1   | 101.0   | 134.4   | 155.6   |  | 0.64 | 1.3E-01 |
| B035DRAFT_02673 | glutamine amidotransferase of anthranilate synthase or aminodeoxychorismate synthase( EC:4.1.3.27 ) | 92.8    | 80.4    | 82.0    | 60.9    | 74.9    | 81.7    |  | 0.85 | 3.6E-01 |
| B035DRAFT_02674 | anthranilate phosphoribosyltransferase( EC:2.4.2.18 )                                               | 89.0    | 84.4    | 87.1    | 69.6    | 86.1    | 97.1    |  | 0.96 | 8.4E-01 |
| B035DRAFT_02675 | Indole-3-glycerol phosphate synthase( EC:4.1.1.48 )                                                 | 79.3    | 74.5    | 63.8    | 63.4    | 68.1    | 66.9    |  | 0.92 | 4.7E-01 |
| B035DRAFT_02676 | Phosphoribosylanthranilate isomerase( EC:5.3.1.24 )                                                 | 67.2    | 70.2    | 60.5    | 46.0    | 52.5    | 57.4    |  | 0.79 | 1.5E-01 |
| B035DRAFT_02677 | tryptophan synthase, alpha subunit( EC:4.2.1.20 )                                                   | 106.6   | 116.1   | 93.6    | 70.2    | 81.3    | 92.1    |  | 0.77 | 2.0E-01 |
| B035DRAFT_02678 | L-asparaginases, type I( EC:3.5.1.1 )                                                               | 115.5   | 118.9   | 124.1   | 134.3   | 127.0   | 170.0   |  | 1.19 | 3.1E-01 |
| B035DRAFT_02679 | Response regulators consisting of a CheY-like receiver domain and a winged-helix DNA-binding domain | 77.9    | 70.9    | 75.1    | 87.4    | 80.6    | 93.9    |  | 1.17 | 1.6E-01 |
| B035DRAFT_02680 | Signal transduction histidine kinase( EC:2.7.13.3 )                                                 | 67.0    | 76.1    | 74.3    | 72.3    | 75.4    | 87.9    |  | 1.08 | 5.4E-01 |
| B035DRAFT_02681 | hypothetical protein                                                                                | 170.1   | 161.1   | 156.5   | 196.7   | 210.7   | 184.7   |  | 1.21 | 8.4E-02 |
| B035DRAFT_02683 | hypothetical protein                                                                                | 236.0   | 241.0   | 223.2   | 188.4   | 260.2   | 204.0   |  | 0.92 | 6.6E-01 |
| B035DRAFT_02684 | gliding motility-associated protein GlfE                                                            | 238.4   | 271.9   | 251.1   | 225.1   | 268.1   | 308.1   |  | 1.05 | 8.1E-01 |
| B035DRAFT_02685 | single stranded DNA-binding protein (ssb)                                                           | 307.4   | 303.1   | 297.1   | 348.3   | 354.2   | 347.4   |  | 1.16 | 6.8E-03 |
| B035DRAFT_02686 | A/G-specific adenine glycosylase( EC:3.2.2.)                                                        | 23.3    | 23.4    | 20.8    | 18.3    | 24.7    | 18.0    |  | 0.90 | 5.8E-01 |
| B035DRAFT_02687 | Bacterial nucleoid DNA-binding protein                                                              | 1284.7  | 1582.3  | 1088.1  | 1322.1  | 1256.1  | 1420.1  |  | 1.02 | 9.3E-01 |
| B035DRAFT_02688 | ribonuclease, Rne/Rng family( EC:3.1.26.)                                                           | 804.9   | 846.2   | 776.3   | 798.9   | 854.8   | 974.3   |  | 1.08 | 5.0E-01 |
| B035DRAFT_02689 | Predicted P-loop-containing kinase                                                                  | 74.7    | 76.3    | 72.5    | 77.5    | 88.6    | 99.7    |  | 1.18 | 2.5E-01 |

|                 |                                                                                                                                                                                                |        |        |        |        |        |        |  |      |         |
|-----------------|------------------------------------------------------------------------------------------------------------------------------------------------------------------------------------------------|--------|--------|--------|--------|--------|--------|--|------|---------|
| B035DRAFT_02690 | Nucleoside-diphosphate-sugar pyrophosphorylase involved in lipopolysaccharide biosynthesis/translation initiation factor 2B, gamma/epsilon subunits (eIF-2Bgamma/eIF-2Bepsilon)( EC:2.7.7.13 ) | 85.4   | 89.3   | 81.9   | 79.2   | 96.4   | 107.3  |  | 1.09 | 5.9E-01 |
| B035DRAFT_02691 | 5-methyltetrahydrofolate--homocysteine methyltransferase( EC:2.1.1.13 )                                                                                                                        | 325.1  | 301.4  | 323.7  | 283.2  | 312.3  | 196.1  |  | 0.82 | 4.4E-01 |
| B035DRAFT_02692 | SsrA-binding protein                                                                                                                                                                           | 234.2  | 211.5  | 200.6  | 218.3  | 230.5  | 276.5  |  | 1.12 | 4.6E-01 |
| B035DRAFT_02693 | Protein of unknown function (DUF1282).                                                                                                                                                         | 195.3  | 211.9  | 212.8  | 220.6  | 227.5  | 253.2  |  | 1.13 | 2.3E-01 |
| B035DRAFT_02694 | hypothetical protein                                                                                                                                                                           | 567.8  | 704.0  | 677.0  | 717.2  | 705.8  | 798.7  |  | 1.14 | 3.5E-01 |
| B035DRAFT_02695 | hypothetical protein                                                                                                                                                                           | 87.9   | 97.6   | 83.7   | 83.2   | 117.9  | 110.4  |  | 1.15 | 5.1E-01 |
| B035DRAFT_02696 | hypothetical protein                                                                                                                                                                           | 2613.3 | 2568.7 | 2419.2 | 3112.5 | 3439.3 | 2982.5 |  | 1.25 | 7.2E-02 |
| B035DRAFT_02697 | hypothetical protein                                                                                                                                                                           | 2357.1 | 2510.6 | 2483.3 | 3077.6 | 3466.3 | 3497.5 |  | 1.36 | 3.3E-02 |
| B035DRAFT_02698 | Site-specific recombinase XerD                                                                                                                                                                 | 22.9   | 26.6   | 27.5   | 22.5   | 24.9   | 31.3   |  | 1.01 | 9.5E-01 |
| B035DRAFT_02699 | hypothetical protein                                                                                                                                                                           | 2.1    | 3.6    | 2.5    | 2.2    | 3.8    | 3.8    |  | 1.18 | 7.2E-01 |
| B035DRAFT_02700 | hypothetical protein                                                                                                                                                                           | 1.5    | 1.8    | 3.7    | 4.8    | 0.0    | 1.4    |  | 1.20 | 9.0E-01 |
| B035DRAFT_02701 | hypothetical protein                                                                                                                                                                           | 7.4    | 6.5    | 7.4    | 6.1    | 6.9    | 5.7    |  | 0.87 | 3.1E-01 |
| B035DRAFT_02702 | Protein of unknown function (DUF1071).                                                                                                                                                         | 1.1    | 1.1    | 1.1    | 2.6    | 1.4    | 1.0    |  | 1.43 | 4.7E-01 |
| B035DRAFT_02703 | hypothetical protein                                                                                                                                                                           | 4.3    | 3.6    | 5.1    | 5.3    | 7.2    | 8.2    |  | 1.59 | 1.8E-01 |
| B035DRAFT_02704 | hypothetical protein                                                                                                                                                                           | 0.0    | 1.0    | 0.0    | 0.0    | 0.8    | 0.0    |  | 0.78 |         |
| B035DRAFT_02705 | hypothetical protein                                                                                                                                                                           | 1.7    | 0.4    | 2.4    | 1.4    | 1.5    | 0.9    |  | 1.07 | 9.6E-01 |
| B035DRAFT_02706 | hypothetical protein                                                                                                                                                                           | 0.8    | 0.0    | 1.0    | 0.0    | 0.8    | 0.0    |  | 0.82 |         |
| B035DRAFT_02707 | hypothetical protein                                                                                                                                                                           | 0.0    | 0.0    | 0.0    | 0.0    | 0.9    | 0.0    |  | 0.00 |         |
| B035DRAFT_02708 | hypothetical protein                                                                                                                                                                           | 1.0    | 2.3    | 0.6    | 1.0    | 0.9    | 1.3    |  | 0.97 | 9.8E-01 |
| B035DRAFT_02709 | hypothetical protein                                                                                                                                                                           | 1.0    | 0.6    | 1.2    | 1.5    | 0.9    | 0.9    |  | 1.23 | 7.0E-01 |
| B035DRAFT_02710 | Site-specific recombinases, DNA invertase Pin homologs                                                                                                                                         | 0.0    | 0.6    | 0.9    | 0.5    | 0.5    | 1.1    |  | 0.89 | 8.7E-01 |
| B035DRAFT_02711 | hypothetical protein                                                                                                                                                                           | 0.7    | 0.0    | 1.8    | 1.5    | 0.7    | 0.0    |  | 0.89 | 9.3E-01 |
| B035DRAFT_02712 | hypothetical protein                                                                                                                                                                           | 2.6    | 2.0    | 2.8    | 0.9    | 2.4    | 2.4    |  | 0.70 | 5.5E-01 |
| B035DRAFT_02713 | hypothetical protein                                                                                                                                                                           | 18.4   | 21.8   | 21.1   | 25.6   | 23.3   | 26.4   |  | 1.23 | 1.5E-01 |
| B035DRAFT_02714 | ATPases with chaperone activity, ATP-binding subunit                                                                                                                                           | 96.4   | 100.2  | 107.8  | 150.2  | 146.1  | 99.3   |  | 1.28 | 3.4E-01 |
| B035DRAFT_02715 | hypothetical protein                                                                                                                                                                           | 21.2   | 25.5   | 14.1   | 24.4   | 22.1   | 17.1   |  | 1.06 | 8.8E-01 |
| B035DRAFT_02716 | hypothetical protein                                                                                                                                                                           | 27.1   | 18.2   | 23.0   | 19.5   | 28.3   | 13.8   |  | 0.88 | 7.7E-01 |
| B035DRAFT_02717 | hypothetical protein                                                                                                                                                                           | 13.9   | 13.8   | 11.0   | 8.1    | 13.7   | 11.1   |  | 0.83 | 5.7E-01 |
| B035DRAFT_02718 | hypothetical protein                                                                                                                                                                           | 6.5    | 8.3    | 4.8    | 4.1    | 8.3    | 7.7    |  | 1.00 | 9.9E-01 |
| B035DRAFT_02719 | hypothetical protein                                                                                                                                                                           | 17.8   | 18.7   | 20.3   | 19.4   | 18.8   | 10.4   |  | 0.82 | 6.0E-01 |
| B035DRAFT_02720 | hypothetical protein                                                                                                                                                                           | 27.9   | 18.7   | 24.7   | 27.6   | 22.6   | 16.9   |  | 0.94 | 8.6E-01 |
| B035DRAFT_02721 | hypothetical protein                                                                                                                                                                           | 26.2   | 18.2   | 25.2   | 24.1   | 24.9   | 15.4   |  | 0.91 | 8.1E-01 |
| B035DRAFT_02722 | Phage baseplate assembly protein W                                                                                                                                                             | 24.0   | 22.0   | 23.4   | 29.4   | 29.0   | 24.4   |  | 1.19 | 2.0E-01 |
| B035DRAFT_02723 | hypothetical protein                                                                                                                                                                           | 17.9   | 16.2   | 16.9   | 21.9   | 17.8   | 15.0   |  | 1.06 | 7.9E-01 |
| B035DRAFT_02724 | hypothetical protein                                                                                                                                                                           | 6.3    | 6.5    | 9.4    | 9.5    | 7.8    | 8.7    |  | 1.19 | 4.8E-01 |
| B035DRAFT_02725 | hypothetical protein                                                                                                                                                                           | 11.1   | 10.7   | 11.0   | 14.6   | 14.8   | 9.9    |  | 1.18 | 4.8E-01 |
| B035DRAFT_02726 | Uncharacterized protein conserved in bacteria                                                                                                                                                  | 13.0   | 13.9   | 12.8   | 13.7   | 14.8   | 8.8    |  | 0.92 | 7.8E-01 |
| B035DRAFT_02727 | hypothetical protein                                                                                                                                                                           | 9.7    | 5.8    | 12.6   | 12.0   | 12.8   | 7.0    |  | 1.14 | 8.1E-01 |
| B035DRAFT_02728 | hypothetical protein                                                                                                                                                                           | 9.5    | 14.5   | 9.2    | 11.0   | 9.2    | 8.3    |  | 0.88 | 6.7E-01 |
| B035DRAFT_02729 | FOG: PKD repeat                                                                                                                                                                                | 11.2   | 8.9    | 10.4   | 11.6   | 12.2   | 5.4    |  | 0.90 | 8.5E-01 |
| B035DRAFT_02730 | hypothetical protein                                                                                                                                                                           | 13.9   | 11.6   | 11.6   | 14.4   | 15.6   | 8.2    |  | 0.99 | 9.9E-01 |
| B035DRAFT_02731 | hypothetical protein                                                                                                                                                                           | 7.6    | 10.1   | 7.5    | 11.5   | 10.1   | 11.9   |  | 1.34 | 1.9E-01 |
| B035DRAFT_02732 | Domain of unknown function (DUF1911)/Domain of unknown function (DUF1910).                                                                                                                     | 19.8   | 17.2   | 14.2   | 20.8   | 20.8   | 26.5   |  | 1.33 | 2.5E-01 |
| B035DRAFT_02733 | hypothetical protein                                                                                                                                                                           | 26.5   | 21.4   | 37.0   | 30.0   | 28.5   | 41.5   |  | 1.19 | 6.3E-01 |
| B035DRAFT_02734 | hypothetical protein                                                                                                                                                                           | 23.7   | 21.2   | 21.2   | 24.7   | 26.8   | 22.9   |  | 1.13 | 2.9E-01 |
| B035DRAFT_02735 | hypothetical protein                                                                                                                                                                           | 13.4   | 9.7    | 10.1   | 17.5   | 15.5   | 10.5   |  | 1.30 | 4.4E-01 |
| B035DRAFT_02736 | hypothetical protein                                                                                                                                                                           | 29.0   | 28.8   | 26.8   | 24.9   | 29.4   | 40.7   |  | 1.10 | 7.3E-01 |
| B035DRAFT_02737 | hypothetical protein                                                                                                                                                                           | 42.3   | 38.1   | 40.6   | 30.1   | 34.3   | 57.4   |  | 0.97 | 9.3E-01 |

|                 |                                                                                 |       |       |       |       |       |       |      |         |
|-----------------|---------------------------------------------------------------------------------|-------|-------|-------|-------|-------|-------|------|---------|
| B035DRAFT_02738 | Type IV secretory pathway, VirD4 components                                     | 23.2  | 16.5  | 20.9  | 15.8  | 15.8  | 14.5  | 0.77 | 2.2E-01 |
| B035DRAFT_02739 | Relaxase/Mobilisation nuclease domain.                                          | 6.5   | 5.5   | 8.1   | 8.4   | 7.8   | 6.0   | 1.11 | 7.0E-01 |
| B035DRAFT_02740 | hypothetical protein                                                            | 5.2   | 4.2   | 3.9   | 3.8   | 8.7   | 4.7   | 1.23 | 6.7E-01 |
| B035DRAFT_02741 | ATPases involved in chromosome partitioning                                     | 4.5   | 2.2   | 7.0   | 5.6   | 4.0   | 2.5   | 0.94 | 9.4E-01 |
| B035DRAFT_02742 | Protein of unknown function (DUF3408).                                          | 6.4   | 2.2   | 5.5   | 7.9   | 10.2  | 5.5   | 1.79 | 4.0E-01 |
| B035DRAFT_02743 | hypothetical protein                                                            | 5.5   | 4.2   | 4.6   | 5.7   | 4.3   | 2.1   | 0.79 | 6.7E-01 |
| B035DRAFT_02744 | hypothetical protein                                                            | 41.4  | 45.9  | 44.5  | 45.2  | 41.2  | 58.6  | 1.09 | 6.7E-01 |
| B035DRAFT_02745 | hypothetical protein                                                            | 38.6  | 41.0  | 30.7  | 35.9  | 34.7  | 47.1  | 1.06 | 8.0E-01 |
| B035DRAFT_02746 | hypothetical protein                                                            | 16.3  | 33.8  | 29.8  | 37.3  | 32.1  | 46.2  | 1.50 | 3.8E-01 |
| B035DRAFT_02747 | hypothetical protein                                                            | 3.6   | 2.8   | 3.0   | 1.3   | 3.3   | 1.5   | 0.59 | 3.5E-01 |
| B035DRAFT_02748 | hypothetical protein                                                            | 1.0   | 1.2   | 2.5   | 2.2   | 2.3   | 0.0   | 1.54 | 4.2E-01 |
| B035DRAFT_02749 | Bacteroides conjugation system ATPase, TraG family                              | 2.1   | 1.2   | 3.3   | 1.5   | 1.9   | 0.7   | 0.62 | 5.1E-01 |
| B035DRAFT_02750 | hypothetical protein                                                            | 1.4   | 1.7   | 2.9   | 2.5   | 0.9   | 0.0   | 0.77 | 8.2E-01 |
| B035DRAFT_02751 | hypothetical protein                                                            | 2.9   | 0.9   | 2.3   | 2.0   | 2.4   | 0.2   | 0.57 | 7.1E-01 |
| B035DRAFT_02752 | Bacteroides conjugative transposon TraJ protein                                 | 2.5   | 1.2   | 1.4   | 2.5   | 1.8   | 0.5   | 0.79 | 8.3E-01 |
| B035DRAFT_02753 | Bacteroides conjugative transposon TraK protein                                 | 3.0   | 1.3   | 2.0   | 1.4   | 1.7   | 1.0   | 0.69 | 4.9E-01 |
| B035DRAFT_02754 | hypothetical protein                                                            | 0.6   | 1.3   | 1.4   | 1.8   | 1.5   | 0.5   | 1.11 | 9.1E-01 |
| B035DRAFT_02755 | Bacteroides conjugative transposon TraM protein                                 | 2.1   | 1.8   | 3.0   | 2.4   | 2.7   | 1.4   | 0.94 | 9.0E-01 |
| B035DRAFT_02756 | Bacteroides conjugative transposon TraN protein                                 | 2.2   | 2.8   | 3.4   | 4.3   | 3.0   | 2.5   | 1.16 | 6.8E-01 |
| B035DRAFT_02757 | Conjugative transposon protein TraO.                                            | 3.2   | 2.7   | 4.2   | 5.4   | 4.7   | 2.9   | 1.27 | 5.7E-01 |
| B035DRAFT_02758 | hypothetical protein                                                            | 2.9   | 4.7   | 4.0   | 5.0   | 1.7   | 2.3   | 0.71 | 5.9E-01 |
| B035DRAFT_02759 | Phage-related lysozyme (muraminidase) (GH24)                                    | 8.1   | 3.7   | 5.6   | 7.0   | 5.7   | 2.9   | 0.89 | 8.7E-01 |
| B035DRAFT_02760 | hypothetical protein                                                            | 6.1   | 6.0   | 8.0   | 8.9   | 10.3  | 2.9   | 0.97 | 9.8E-01 |
| B035DRAFT_02761 | hypothetical protein                                                            | 4.2   | 3.3   | 4.5   | 4.7   | 4.7   | 1.3   | 0.76 | 7.5E-01 |
| B035DRAFT_02762 | hypothetical protein                                                            | 4.6   | 3.5   | 4.8   | 4.9   | 5.3   | 3.5   | 1.05 | 8.8E-01 |
| B035DRAFT_02763 | Type I restriction-modification system methyltransferase subunit( EC:2.1.1.72 ) | 4.1   | 3.4   | 1.9   | 6.2   | 7.4   | 2.5   | 1.61 | 5.1E-01 |
| B035DRAFT_02764 | hypothetical protein                                                            | 5.1   | 4.1   | 4.3   | 7.6   | 6.1   | 2.8   | 1.14 | 8.3E-01 |
| B035DRAFT_02765 | hypothetical protein                                                            | 5.4   | 2.1   | 3.7   | 7.6   | 4.9   | 6.1   | 1.75 | 3.3E-01 |
| B035DRAFT_02766 | hypothetical protein                                                            | 11.6  | 17.5  | 17.0  | 18.9  | 15.8  | 14.8  | 1.09 | 7.7E-01 |
| B035DRAFT_02767 | hypothetical protein                                                            | 43.1  | 38.1  | 52.4  | 61.3  | 44.8  | 32.9  | 1.02 | 9.7E-01 |
| B035DRAFT_02768 | hypothetical protein                                                            | 30.2  | 27.9  | 33.5  | 39.5  | 34.9  | 22.9  | 1.04 | 9.2E-01 |
| B035DRAFT_02769 | hypothetical protein                                                            | 13.2  | 9.5   | 13.5  | 16.7  | 15.1  | 7.0   | 1.01 | 9.8E-01 |
| B035DRAFT_02770 | DnaJ-class molecular chaperone with C-terminal Zn finger domain                 | 13.4  | 13.1  | 13.1  | 18.1  | 17.1  | 8.6   | 1.05 | 9.2E-01 |
| B035DRAFT_02771 | hypothetical protein                                                            | 12.1  | 8.4   | 5.9   | 14.4  | 13.1  | 3.7   | 1.05 | 9.6E-01 |
| B035DRAFT_02772 | hypothetical protein                                                            | 8.4   | 11.1  | 8.9   | 8.3   | 10.2  | 4.1   | 0.75 | 5.8E-01 |
| B035DRAFT_02773 | hypothetical protein                                                            | 13.8  | 10.5  | 10.3  | 11.3  | 14.5  | 5.4   | 0.84 | 7.7E-01 |
| B035DRAFT_02774 | hypothetical protein                                                            | 13.2  | 14.8  | 11.5  | 12.1  | 20.5  | 16.8  | 1.23 | 5.0E-01 |
| B035DRAFT_02775 | hypothetical protein                                                            | 20.1  | 7.8   | 9.8   | 9.9   | 10.3  | 4.3   | 0.66 | 5.7E-01 |
| B035DRAFT_02776 | hypothetical protein                                                            | 12.7  | 14.6  | 13.9  | 16.6  | 19.7  | 10.7  | 1.11 | 7.7E-01 |
| B035DRAFT_02777 | hypothetical protein                                                            | 18.6  | 12.2  | 16.5  | 18.4  | 20.8  | 5.4   | 0.82 | 8.1E-01 |
| B035DRAFT_02778 | hypothetical protein                                                            | 14.8  | 13.9  | 13.2  | 13.8  | 18.0  | 6.2   | 0.83 | 7.6E-01 |
| B035DRAFT_02779 | Site-specific recombinase XerD                                                  | 155.1 | 133.2 | 136.2 | 165.2 | 168.5 | 102.7 | 1.01 | 9.9E-01 |
| B035DRAFT_02780 | hypothetical protein                                                            | 0.0   | 0.0   | 0.0   | 0.0   | 0.0   | 0.0   | 0.00 |         |
| B035DRAFT_02781 | ( tRNA )                                                                        | 44.5  | 78.8  | 55.4  | 50.3  | 40.3  | 41.4  | 0.76 | 4.0E-01 |
| B035DRAFT_02782 | thiamine-monophosphate kinase( EC:2.7.4.16 )                                    | 432.0 | 437.2 | 424.5 | 352.1 | 324.3 | 336.5 | 0.78 | 1.5E-02 |
| B035DRAFT_02783 | purine nucleoside phosphorylase I, inosine and guanosine-specific( EC:2.4.2.1 ) | 400.0 | 409.2 | 373.1 | 325.9 | 311.7 | 338.4 | 0.83 | 5.8E-02 |
| B035DRAFT_02784 | tetraacyldisaccharide 4"-kinase( EC:2.7.1.130 )                                 | 177.2 | 173.2 | 164.9 | 145.2 | 140.2 | 152.4 | 0.85 | 6.2E-02 |
| B035DRAFT_02785 | signal peptide peptidase SppA, 67K type( EC:3.4.21.)                            | 321.5 | 304.4 | 296.0 | 274.6 | 234.8 | 253.5 | 0.83 | 1.1E-01 |
| B035DRAFT_02786 | Predicted oxidoreductase related to nitroreductase                              | 578.7 | 542.1 | 575.3 | 531.1 | 430.3 | 528.7 | 0.87 | 3.3E-01 |

|                 |                                                                                                          |       |       |       |       |       |       |      |         |
|-----------------|----------------------------------------------------------------------------------------------------------|-------|-------|-------|-------|-------|-------|------|---------|
| B035DRAFT_02787 | Predicted kinase related to galactokinase and mevalonate kinase                                          | 317.6 | 277.6 | 310.9 | 221.4 | 192.9 | 164.2 | 0.63 | 7.0E-02 |
| B035DRAFT_02788 | hypothetical protein                                                                                     | 0.0   | 0.0   | 0.0   | 0.0   | 0.0   | 0.0   | 0.00 |         |
| B035DRAFT_02789 | Uncharacterized protein involved in exopolysaccharide biosynthesis                                       | 145.1 | 157.7 | 141.8 | 144.0 | 161.2 | 185.7 | 1.10 | 5.1E-01 |
| B035DRAFT_02790 | Glycosyltransferases involved in cell wall biogenesis (GT2)                                              | 72.2  | 79.7  | 72.8  | 88.2  | 73.0  | 99.0  | 1.15 | 4.2E-01 |
| B035DRAFT_02791 | Glycosyltransferase( EC:2.4.1.) (GT4)                                                                    | 75.3  | 85.6  | 89.6  | 83.6  | 71.7  | 98.4  | 1.01 | 9.8E-01 |
| B035DRAFT_02792 | hypothetical protein                                                                                     | 47.6  | 48.4  | 53.6  | 56.0  | 45.5  | 67.6  | 1.12 | 6.1E-01 |
| B035DRAFT_02793 | hypothetical protein                                                                                     | 103.5 | 123.9 | 120.6 | 127.3 | 111.9 | 143.5 | 1.10 | 5.7E-01 |
| B035DRAFT_02794 | Glycosyltransferases involved in cell wall biogenesis (GT2)                                              | 147.3 | 173.8 | 154.1 | 178.7 | 157.4 | 209.0 | 1.14 | 4.4E-01 |
| B035DRAFT_02795 | Predicted glycosyltransferases (GT2)                                                                     | 134.0 | 146.7 | 141.0 | 137.0 | 119.3 | 153.5 | 0.97 | 8.3E-01 |
| B035DRAFT_02796 | Membrane protein involved in the export of O-antigen and teichoic acid                                   | 131.7 | 156.6 | 145.5 | 125.4 | 117.3 | 159.8 | 0.92 | 6.8E-01 |
| B035DRAFT_02797 | Glycosyl transferase (GT11)                                                                              | 122.5 | 150.3 | 139.0 | 136.5 | 132.5 | 182.7 | 1.09 | 6.9E-01 |
| B035DRAFT_02798 | Predicted pyridoxal phosphate-dependent enzyme apparently involved in regulation of cell wall biogenesis | 189.5 | 209.0 | 200.5 | 192.3 | 196.6 | 245.1 | 1.05 | 7.4E-01 |
| B035DRAFT_02799 | Acetyltransferase (isoleucine patch superfamily)                                                         | 169.2 | 179.4 | 160.7 | 130.3 | 157.5 | 190.8 | 0.93 | 7.3E-01 |
| B035DRAFT_02800 | WxcM-like, C-terminal.                                                                                   | 168.5 | 172.8 | 149.9 | 101.1 | 138.1 | 150.6 | 0.78 | 3.2E-01 |
| B035DRAFT_02801 | WxcM-like, C-terminal.                                                                                   | 203.6 | 231.8 | 204.0 | 145.3 | 169.6 | 180.1 | 0.77 | 1.4E-01 |
| B035DRAFT_02802 | UDP-N-acetylmuramyl pentapeptide phosphotransferase/UDP-N-acetylglucosamine-1-phosphate transferase      | 242.7 | 255.5 | 263.6 | 202.1 | 184.2 | 224.8 | 0.80 | 1.2E-01 |
| B035DRAFT_02803 | Transcription antiterminator                                                                             | 505.6 | 513.2 | 564.8 | 473.3 | 418.9 | 456.5 | 0.85 | 1.5E-01 |
| B035DRAFT_02804 | hypothetical protein                                                                                     | 95.2  | 102.9 | 93.0  | 60.7  | 42.5  | 48.7  | 0.52 | 4.2E-02 |
| B035DRAFT_02805 | Nucleoside-diphosphate-sugar epimerases( EC:1.1.1.271 )                                                  | 251.4 | 252.1 | 225.1 | 199.1 | 241.8 | 225.2 | 0.91 | 4.6E-01 |
| B035DRAFT_02806 | GDP-mannose 4,6-dehydratase( EC:4.2.1.47 )                                                               | 290.4 | 280.9 | 262.3 | 233.5 | 274.2 | 232.5 | 0.89 | 3.1E-01 |
| B035DRAFT_02807 | Mannose-1-phosphate guanylyltransferase( EC:2.7.7.22 )                                                   | 152.4 | 165.8 | 144.4 | 184.7 | 197.8 | 202.2 | 1.27 | 6.8E-02 |
| B035DRAFT_02808 | glucose-1-phosphate thymidyltransferase, short form( EC:2.7.7.24 )                                       | 180.2 | 185.3 | 170.5 | 179.0 | 177.9 | 200.9 | 1.04 | 6.4E-01 |
| B035DRAFT_02809 | dTDP-4-dehydrorhamnose 3,5-epimerase( EC:5.1.3.13 )                                                      | 224.0 | 269.2 | 239.4 | 233.0 | 245.1 | 272.9 | 1.03 | 8.6E-01 |
| B035DRAFT_02810 | Periplasmic protein involved in polysaccharide export                                                    | 220.1 | 201.4 | 206.8 | 192.2 | 186.4 | 140.8 | 0.82 | 3.1E-01 |
| B035DRAFT_02811 | Response regulators consisting of a CheY-like receiver domain and a winged-helix DNA-binding domain      | 337.4 | 370.2 | 301.0 | 403.8 | 420.5 | 388.0 | 1.21 | 1.7E-01 |
| B035DRAFT_02812 | Sugar transferases involved in lipopolysaccharide synthesis                                              | 183.1 | 208.0 | 189.0 | 241.7 | 219.8 | 264.8 | 1.25 | 1.3E-01 |
| B035DRAFT_02813 | Outer membrane protein                                                                                   | 77.6  | 97.6  | 73.3  | 87.3  | 88.9  | 99.9  | 1.12 | 5.2E-01 |
| B035DRAFT_02814 | hypothetical protein                                                                                     | 44.0  | 57.0  | 52.9  | 51.7  | 50.1  | 58.1  | 1.04 | 8.1E-01 |
| B035DRAFT_02815 | O-Antigen ligase.                                                                                        | 31.8  | 40.4  | 51.0  | 49.7  | 30.1  | 42.2  | 0.99 | 9.8E-01 |
| B035DRAFT_02816 | Predicted glycosyltransferases (GT2)                                                                     | 25.4  | 37.7  | 40.2  | 50.1  | 34.5  | 38.1  | 1.20 | 5.9E-01 |
| B035DRAFT_02817 | Glycosyltransferases, probably involved in cell wall biogenesis (GT2)                                    | 17.9  | 14.0  | 20.5  | 19.9  | 15.6  | 16.2  | 0.99 | 9.8E-01 |
| B035DRAFT_02818 | hypothetical protein                                                                                     | 12.1  | 16.7  | 19.8  | 12.8  | 11.8  | 13.0  | 0.79 | 3.8E-01 |
| B035DRAFT_02819 | Glycosyltransferases, probably involved in cell wall biogenesis (GT2)                                    | 6.4   | 5.5   | 5.8   | 6.8   | 4.6   | 5.5   | 0.95 | 8.1E-01 |
| B035DRAFT_02820 | Acetyltransferase (isoleucine patch superfamily)( EC:2.3.1.18 )                                          | 6.9   | 4.2   | 4.0   | 5.2   | 6.2   | 8.0   | 1.31 | 4.8E-01 |
| B035DRAFT_02821 | hypothetical protein                                                                                     | 9.4   | 7.6   | 10.2  | 6.5   | 9.1   | 11.4  | 0.97 | 9.3E-01 |
| B035DRAFT_02822 | Glycosyltransferases involved in cell wall biogenesis (GT2)                                              | 21.1  | 22.6  | 21.3  | 17.0  | 16.4  | 19.1  | 0.81 | 8.8E-02 |
| B035DRAFT_02823 | Glycosyltransferases involved in cell wall biogenesis (GT2)                                              | 30.3  | 32.0  | 40.4  | 23.7  | 25.5  | 21.8  | 0.70 | 1.2E-01 |
| B035DRAFT_02824 | hypothetical protein                                                                                     | 33.2  | 34.8  | 32.0  | 27.7  | 26.4  | 23.9  | 0.78 | 6.3E-02 |
| B035DRAFT_02825 | ABC-type polysaccharide/polyol phosphate transport system, ATPase component                              | 26.8  | 23.2  | 20.7  | 16.0  | 18.6  | 13.1  | 0.67 | 1.5E-01 |
| B035DRAFT_02826 | ABC-type polysaccharide/polyol phosphate export systems, permease component                              | 37.0  | 30.3  | 34.7  | 28.4  | 35.8  | 30.4  | 0.93 | 6.4E-01 |
| B035DRAFT_02827 | Glycosyltransferase (GT4)                                                                                | 45.8  | 47.8  | 46.7  | 50.5  | 55.8  | 49.3  | 1.11 | 2.1E-01 |
| B035DRAFT_02828 | hypothetical protein                                                                                     | 76.1  | 68.1  | 73.6  | 86.7  | 106.9 | 107.7 | 1.38 | 9.0E-02 |
| B035DRAFT_02829 | Predicted acyltransferases                                                                               | 6.8   | 5.7   | 6.8   | 8.3   | 7.8   | 9.4   | 1.32 | 1.3E-01 |
| B035DRAFT_02830 | hypothetical protein                                                                                     | 1.5   | 4.4   | 1.8   | 2.4   | 1.4   | 5.5   | 1.14 | 9.0E-01 |
| B035DRAFT_02831 | Glycosyltransferase (GT4)                                                                                | 62.2  | 70.5  | 64.1  | 88.2  | 81.6  | 75.5  | 1.25 | 1.1E-01 |
| B035DRAFT_02832 | Glycosyltransferase (GT4)                                                                                | 55.9  | 54.7  | 53.1  | 57.4  | 63.7  | 56.0  | 1.08 | 3.3E-01 |

|                 |                                                                                                                                     |         |         |         |          |          |         |      |         |
|-----------------|-------------------------------------------------------------------------------------------------------------------------------------|---------|---------|---------|----------|----------|---------|------|---------|
| B035DRAFT_02833 | Glycosyltransferase (GT4)                                                                                                           | 47.8    | 46.7    | 48.5    | 57.4     | 53.2     | 44.2    | 1.08 | 6.0E-01 |
| B035DRAFT_02834 | Glycosyltransferase (GT4)                                                                                                           | 38.7    | 36.0    | 45.3    | 45.5     | 40.0     | 42.2    | 1.07 | 6.4E-01 |
| B035DRAFT_02835 | Glycosyltransferase (GT4)                                                                                                           | 34.0    | 41.1    | 36.2    | 41.4     | 29.6     | 30.8    | 0.91 | 6.6E-01 |
| B035DRAFT_02836 | Glycosyltransferase (GT4)                                                                                                           | 26.5    | 28.8    | 34.8    | 26.6     | 24.3     | 29.2    | 0.89 | 5.1E-01 |
| B035DRAFT_02837 | Glycosyltransferase (GT2)                                                                                                           | 22.3    | 24.5    | 24.7    | 25.1     | 19.8     | 24.1    | 0.96 | 8.0E-01 |
| B035DRAFT_02838 | Glycosyltransferase (GT4)                                                                                                           | 22.9    | 27.1    | 26.2    | 24.7     | 16.8     | 21.1    | 0.81 | 3.7E-01 |
| B035DRAFT_02839 | Glycosyltransferase (GT2)                                                                                                           | 39.3    | 55.8    | 52.7    | 54.9     | 50.0     | 63.7    | 1.15 | 5.6E-01 |
| B035DRAFT_02840 | FOG: CheY-like receiver                                                                                                             | 97.8    | 137.6   | 108.6   | 135.1    | 133.7    | 176.1   | 1.30 | 3.2E-01 |
| B035DRAFT_02841 | His Kinase A (phosphoacceptor) domain./Response regulator receiver domain./Histidine kinase-, DNA gyrase B-, and HSP90-like ATPase. | 121.2   | 134.0   | 129.5   | 147.6    | 146.7    | 180.0   | 1.23 | 1.8E-01 |
| B035DRAFT_02842 | Metal-dependent hydrolase                                                                                                           | 56.1    | 63.4    | 62.1    | 51.4     | 52.8     | 56.5    | 0.88 | 2.0E-01 |
| B035DRAFT_02843 | hypothetical protein                                                                                                                | 0.0     | 0.0     | 0.0     | 0.0      | 0.0      | 0.0     | 0.00 |         |
| B035DRAFT_02844 | hypothetical protein                                                                                                                | 0.0     | 0.0     | 0.0     | 0.0      | 0.0      | 0.0     | 0.00 |         |
| B035DRAFT_02845 | ( miscRNA )                                                                                                                         | 82741.8 | 73753.8 | 81225.4 | 102951.3 | 112466.6 | 93360.2 | 1.30 | 9.4E-02 |
| B035DRAFT_02846 | Beta-glucosidase-related glycosidases( EC:3.2.1.21 ) (GH3)                                                                          | 10.3    | 7.5     | 7.3     | 9.6      | 10.0     | 7.2     | 1.06 | 8.3E-01 |
| B035DRAFT_02847 | 3-carboxymuconate cyclase                                                                                                           | 64.6    | 67.3    | 69.9    | 83.0     | 86.0     | 80.1    | 1.23 | 3.3E-02 |
| B035DRAFT_02848 | Predicted glycosylase (GH130)                                                                                                       | 61.8    | 69.5    | 69.4    | 58.5     | 68.3     | 57.7    | 0.92 | 4.8E-01 |
| B035DRAFT_02849 | Exonuclease III                                                                                                                     | 45.1    | 46.9    | 45.7    | 34.3     | 46.1     | 50.0    | 0.93 | 7.5E-01 |
| B035DRAFT_02850 | hypothetical protein                                                                                                                | 108.6   | 106.2   | 109.6   | 109.0    | 119.3    | 110.8   | 1.04 | 4.2E-01 |
| B035DRAFT_02851 | Alpha-glucosidases, family 31 of glycosyl hydrolases (GH31)                                                                         | 133.2   | 125.7   | 122.3   | 115.1    | 134.5    | 112.4   | 0.95 | 6.3E-01 |
| B035DRAFT_02852 | Na+/proline symporter                                                                                                               | 102.0   | 111.3   | 108.2   | 81.6     | 95.5     | 100.9   | 0.86 | 2.7E-01 |
| B035DRAFT_02853 | Cytosine/adenosine deaminases                                                                                                       | 220.0   | 227.8   | 211.0   | 184.9    | 186.5    | 200.6   | 0.87 | 8.8E-02 |
| B035DRAFT_02854 | Phosphomannose isomerase( EC:5.3.1.8 )                                                                                              | 247.7   | 251.5   | 237.1   | 205.6    | 251.7    | 265.0   | 0.98 | 8.8E-01 |
| B035DRAFT_02855 | hypothetical protein                                                                                                                | 21.8    | 20.1    | 24.3    | 17.4     | 17.5     | 13.9    | 0.74 | 1.4E-01 |
| B035DRAFT_02856 | Outer membrane receptor proteins, mostly Fe transport                                                                               | 14.4    | 13.2    | 14.3    | 8.7      | 11.5     | 9.9     | 0.72 | 9.6E-02 |
| B035DRAFT_02857 | Threonine aldolase( EC:4.1.2.5 )                                                                                                    | 69.4    | 78.0    | 72.0    | 89.2     | 86.9     | 74.0    | 1.14 | 3.2E-01 |
| B035DRAFT_02858 | Response regulator containing CheY-like receiver domain and AraC-type DNA-binding domain                                            | 50.0    | 60.8    | 61.6    | 44.2     | 43.2     | 45.4    | 0.77 | 1.1E-01 |
| B035DRAFT_02859 | hypothetical protein                                                                                                                | 262.2   | 283.1   | 273.6   | 199.6    | 226.3    | 284.3   | 0.86 | 4.3E-01 |
| B035DRAFT_02860 | proton-translocating NADH-quinone oxidoreductase, chain N( EC:1.6.5.3 )                                                             | 37.9    | 38.7    | 37.9    | 39.9     | 42.1     | 44.8    | 1.11 | 1.7E-01 |
| B035DRAFT_02861 | proton-translocating NADH-quinone oxidoreductase, chain M( EC:1.6.5.3 )                                                             | 37.2    | 31.5    | 40.1    | 37.7     | 38.2     | 34.4    | 1.02 | 9.1E-01 |
| B035DRAFT_02862 | proton-translocating NADH-quinone oxidoreductase, chain L( EC:1.6.5.3 )                                                             | 26.5    | 25.2    | 28.8    | 33.8     | 30.4     | 31.2    | 1.19 | 1.3E-01 |
| B035DRAFT_02863 | NADH:ubiquinone oxidoreductase subunit 11 or 4L (chain K)( EC:1.6.5.3 )                                                             | 18.0    | 20.3    | 14.6    | 15.0     | 17.3     | 24.3    | 1.06 | 8.8E-01 |
| B035DRAFT_02864 | NADH:ubiquinone oxidoreductase subunit 6 (chain J)( EC:1.6.5.3 )                                                                    | 24.5    | 31.9    | 31.4    | 33.9     | 32.8     | 28.3    | 1.09 | 6.6E-01 |
| B035DRAFT_02865 | NADH-quinone oxidoreductase, chain I( EC:1.6.5.3 )                                                                                  | 29.1    | 28.6    | 30.4    | 25.1     | 27.0     | 26.1    | 0.89 | 8.5E-02 |
| B035DRAFT_02866 | NADH:ubiquinone oxidoreductase subunit 1 (chain H)( EC:1.6.5.3 )                                                                    | 54.6    | 50.7    | 53.6    | 48.9     | 46.9     | 50.3    | 0.92 | 1.8E-01 |
| B035DRAFT_02867 | NADH:ubiquinone oxidoreductase 49 kD subunit 7( EC:1.6.5.3 )                                                                        | 65.1    | 59.5    | 59.5    | 55.7     | 53.7     | 36.6    | 0.78 | 3.4E-01 |
| B035DRAFT_02868 | NADH-quinone oxidoreductase, B subunit( EC:1.6.5.3 )                                                                                | 60.3    | 53.1    | 59.8    | 52.0     | 42.4     | 39.2    | 0.77 | 1.8E-01 |
| B035DRAFT_02869 | NADH:ubiquinone oxidoreductase subunit 3 (chain A)( EC:1.6.5.3 )                                                                    | 56.8    | 65.5    | 71.4    | 59.3     | 44.5     | 48.6    | 0.78 | 2.5E-01 |
| B035DRAFT_02870 | hypothetical protein                                                                                                                | 55.0    | 81.6    | 75.9    | 75.2     | 56.1     | 90.5    | 1.04 | 9.2E-01 |
| B035DRAFT_02871 | Trk-type K+ transport systems, membrane components                                                                                  | 65.6    | 76.0    | 76.9    | 57.9     | 65.7     | 69.7    | 0.88 | 3.8E-01 |
| B035DRAFT_02872 | K+ transport systems, NAD-binding component                                                                                         | 121.2   | 124.6   | 120.9   | 116.6    | 116.2    | 114.5   | 0.95 | 6.7E-02 |
| B035DRAFT_02873 | 1-deoxy-D-xylulose-5-phosphate synthase( EC:2.2.1.7 )                                                                               | 172.2   | 163.6   | 172.5   | 178.4    | 162.5    | 146.8   | 0.96 | 6.8E-01 |
| B035DRAFT_02874 | GSCFA family                                                                                                                        | 64.2    | 58.5    | 62.7    | 73.9     | 86.9     | 78.9    | 1.29 | 7.2E-02 |
| B035DRAFT_02875 | alanine racemase( EC:5.1.1.1 )                                                                                                      | 171.1   | 148.2   | 147.9   | 231.1    | 240.0    | 257.4   | 1.56 | 2.5E-02 |
| B035DRAFT_02876 | hypothetical protein                                                                                                                | 63.5    | 60.2    | 58.3    | 166.8    | 145.5    | 138.3   | 2.47 | 3.9E-03 |
| B035DRAFT_02877 | Superfamily I DNA and RNA helicases and helicase subunits                                                                           | 71.2    | 61.3    | 62.4    | 61.0     | 70.1     | 55.0    | 0.95 | 7.6E-01 |
| B035DRAFT_02878 | Zn-dependent protease with chaperone function                                                                                       | 46.4    | 43.0    | 39.8    | 38.0     | 57.7     | 45.8    | 1.08 | 7.4E-01 |
| B035DRAFT_02879 | Nitrate/nitrite transporter                                                                                                         | 34.3    | 29.1    | 24.4    | 28.0     | 33.2     | 31.6    | 1.06 | 7.7E-01 |
| B035DRAFT_02880 | 5-keto 4-deoxyuronate isomerase( EC:5.3.1.17 )                                                                                      | 117.7   | 76.3    | 65.3    | 53.3     | 68.6     | 65.0    | 0.74 | 4.0E-01 |
| B035DRAFT_02881 | Phosphotransferase system, galactitol-specific IIC component                                                                        | 78.9    | 62.2    | 47.1    | 40.2     | 48.0     | 58.6    | 0.79 | 4.8E-01 |

|                 |                                                                           |        |        |        |        |        |        |  |      |         |
|-----------------|---------------------------------------------------------------------------|--------|--------|--------|--------|--------|--------|--|------|---------|
| B035DRAFT_02882 | hypothetical protein                                                      | 80.4   | 86.0   | 74.4   | 94.8   | 84.6   | 87.7   |  | 1.11 | 3.1E-01 |
| B035DRAFT_02883 | hypothetical protein                                                      | 0.0    | 0.0    | 0.0    | 0.0    | 0.0    | 0.0    |  | 0.00 |         |
| B035DRAFT_02884 | TonB-linked outer membrane protein, SusC/RagA family                      | 72.9   | 55.7   | 48.5   | 37.8   | 45.2   | 59.9   |  | 0.80 | 5.0E-01 |
| B035DRAFT_02885 | SusD family                                                               | 63.5   | 61.5   | 59.7   | 35.7   | 32.5   | 50.0   |  | 0.63 | 1.2E-01 |
| B035DRAFT_02886 | Predicted metal-sulfur cluster biosynthetic enzyme                        | 198.4  | 204.3  | 153.0  | 211.1  | 236.1  | 217.6  |  | 1.20 | 3.2E-01 |
| B035DRAFT_02887 | Uncharacterized protein conserved in bacteria( EC:3.6.1.)                 | 178.2  | 190.7  | 178.0  | 167.6  | 208.2  | 211.3  |  | 1.07 | 6.4E-01 |
| B035DRAFT_02888 | Alpha-galactosidase( EC:3.2.1.22 ) (GH36)                                 | 244.9  | 232.1  | 241.3  | 225.3  | 272.6  | 254.7  |  | 1.04 | 6.8E-01 |
| B035DRAFT_02889 | acetate kinase( EC:2.7.2.1 )                                              | 475.2  | 446.7  | 430.3  | 341.7  | 449.4  | 463.8  |  | 0.92 | 6.5E-01 |
| B035DRAFT_02890 | phosphate acetyltransferase( EC:2.3.1.8 )                                 | 441.5  | 406.9  | 358.8  | 340.7  | 392.3  | 384.9  |  | 0.93 | 5.8E-01 |
| B035DRAFT_02891 | Putative effector of murein hydrolase LrgA                                | 68.2   | 86.0   | 70.8   | 111.0  | 106.4  | 103.2  |  | 1.43 | 6.8E-02 |
| B035DRAFT_02892 | Putative effector of murein hydrolase                                     | 92.5   | 82.9   | 74.4   | 103.0  | 115.5  | 94.2   |  | 1.25 | 2.0E-01 |
| B035DRAFT_02893 | Uncharacterized conserved protein                                         | 750.9  | 604.1  | 592.8  | 558.9  | 440.4  | 277.6  |  | 0.63 | 2.8E-01 |
| B035DRAFT_02894 | hypothetical protein                                                      | 460.4  | 401.9  | 434.8  | 351.2  | 267.2  | 209.9  |  | 0.63 | 1.6E-01 |
| B035DRAFT_02895 | UDP-N-acetylmuramoyl-tripeptide--D-alanyl-D-alanine ligase( EC:6.3.2.10 ) | 52.0   | 62.0   | 48.1   | 54.7   | 47.6   | 41.7   |  | 0.89 | 5.5E-01 |
| B035DRAFT_02896 | dihydropteroate synthase( EC:2.5.1.15 )                                   | 87.9   | 92.8   | 92.2   | 95.8   | 94.8   | 76.1   |  | 0.97 | 8.5E-01 |
| B035DRAFT_02897 | TIGR00159 family protein                                                  | 57.2   | 59.6   | 51.1   | 56.5   | 65.1   | 53.4   |  | 1.04 | 7.8E-01 |
| B035DRAFT_02898 | hypothetical protein                                                      | 30.8   | 26.9   | 25.8   | 25.4   | 31.3   | 18.9   |  | 0.89 | 6.8E-01 |
| B035DRAFT_02899 | Beta-xylosidase (GH43)                                                    | 57.4   | 47.1   | 50.3   | 57.7   | 59.8   | 38.3   |  | 0.99 | 9.8E-01 |
| B035DRAFT_02900 | Beta-galactosidase( EC:3.2.1.23 ) (GH35)                                  | 98.2   | 82.1   | 87.2   | 72.4   | 96.0   | 67.6   |  | 0.87 | 5.3E-01 |
| B035DRAFT_02901 | exonuclease SbcD                                                          | 91.2   | 79.9   | 69.2   | 60.3   | 78.0   | 51.8   |  | 0.78 | 3.6E-01 |
| B035DRAFT_02902 | ATPase involved in DNA repair                                             | 123.3  | 106.6  | 113.4  | 94.2   | 105.1  | 64.0   |  | 0.75 | 3.3E-01 |
| B035DRAFT_02903 | DNA-binding protein, histone-like, putative                               | 164.3  | 182.6  | 155.0  | 159.1  | 162.5  | 138.3  |  | 0.92 | 4.9E-01 |
| B035DRAFT_02904 | Predicted sugar kinase( EC:2.7.1.23 )                                     | 99.8   | 107.5  | 109.8  | 139.5  | 117.0  | 120.5  |  | 1.19 | 1.8E-01 |
| B035DRAFT_02905 | pyridoxine 5"-phosphate synthase( EC:2.6.99.2 )                           | 191.4  | 177.9  | 193.8  | 257.3  | 241.9  | 197.6  |  | 1.23 | 2.2E-01 |
| B035DRAFT_02906 | Biopolymer transport proteins                                             | 361.9  | 359.3  | 400.2  | 487.3  | 444.9  | 328.9  |  | 1.11 | 6.4E-01 |
| B035DRAFT_02907 | Biopolymer transport protein                                              | 339.9  | 387.1  | 488.4  | 503.0  | 421.5  | 377.2  |  | 1.08 | 7.7E-01 |
| B035DRAFT_02908 | TonB family C-terminal domain                                             | 169.3  | 115.0  | 136.8  | 165.1  | 146.3  | 51.5   |  | 0.78 | 7.2E-01 |
| B035DRAFT_02909 | DJ-1 family protein                                                       | 263.8  | 233.4  | 239.8  | 253.9  | 289.1  | 160.5  |  | 0.93 | 8.3E-01 |
| B035DRAFT_02910 | 2-C-methyl-D-erythritol 4-phosphate cytidyltransferase( EC:2.7.7.60 )     | 258.2  | 232.7  | 250.1  | 268.4  | 277.5  | 164.5  |  | 0.93 | 8.4E-01 |
| B035DRAFT_02911 | ATP-dependent DNA helicase RecG( EC:3.6.4.12 )                            | 123.6  | 119.7  | 114.7  | 124.4  | 135.3  | 121.7  |  | 1.06 | 3.8E-01 |
| B035DRAFT_02912 | Nucleoside diphosphate kinase( EC:2.7.4.6 )                               | 952.1  | 1117.4 | 1041.5 | 1017.6 | 968.5  | 966.7  |  | 0.95 | 5.7E-01 |
| B035DRAFT_02913 | Membrane proteins related to metalloendopeptidases (CBM50)                | 690.7  | 752.0  | 763.6  | 735.3  | 677.8  | 626.7  |  | 0.92 | 4.3E-01 |
| B035DRAFT_02914 | Domain of Unknown Function (DUF1599).                                     | 338.8  | 335.2  | 312.3  | 319.0  | 323.2  | 284.7  |  | 0.94 | 4.6E-01 |
| B035DRAFT_02915 | Predicted membrane protein                                                | 213.6  | 242.6  | 219.1  | 202.2  | 221.6  | 255.0  |  | 1.00 | 9.9E-01 |
| B035DRAFT_02916 | triosephosphate isomerase( EC:5.3.1.1 )                                   | 1815.5 | 2165.7 | 1890.2 | 1646.1 | 1805.5 | 2139.2 |  | 0.95 | 7.7E-01 |
| B035DRAFT_02917 | Sporulation related domain.                                               | 473.6  | 463.7  | 455.0  | 447.1  | 485.4  | 488.3  |  | 1.02 | 7.3E-01 |
| B035DRAFT_02918 | GTP cyclohydrolase I( EC:3.5.4.16 )                                       | 454.2  | 445.0  | 437.8  | 438.3  | 444.7  | 455.7  |  | 1.00 | 9.7E-01 |
| B035DRAFT_02919 | DNA primase, catalytic core( EC:2.7.7.)                                   | 114.4  | 124.5  | 122.9  | 151.9  | 148.8  | 155.5  |  | 1.26 | 2.3E-02 |
| B035DRAFT_02920 | Glycoside hydrolase (GH4)                                                 | 164.2  | 168.5  | 161.9  | 181.4  | 141.7  | 146.8  |  | 0.94 | 6.9E-01 |
| B035DRAFT_02921 | hypothetical protein                                                      | 84.5   | 93.5   | 67.8   | 99.2   | 109.4  | 100.3  |  | 1.27 | 2.3E-01 |
| B035DRAFT_02922 | hypothetical protein                                                      | 58.0   | 47.1   | 53.1   | 48.1   | 51.0   | 60.1   |  | 1.01 | 9.8E-01 |
| B035DRAFT_02923 | hypothetical protein                                                      | 95.7   | 90.7   | 73.5   | 100.7  | 81.2   | 91.3   |  | 1.05 | 7.8E-01 |
| B035DRAFT_02924 | hypothetical protein                                                      | 801.3  | 828.7  | 1005.7 | 1090.3 | 788.8  | 762.9  |  | 0.99 | 9.8E-01 |
| B035DRAFT_02925 | hypothetical protein                                                      | 44.5   | 46.3   | 66.5   | 54.8   | 53.4   | 59.1   |  | 1.08 | 7.5E-01 |
| B035DRAFT_02926 | Predicted phosphohydrolases                                               | 48.0   | 52.3   | 45.5   | 46.9   | 36.4   | 45.6   |  | 0.88 | 4.3E-01 |
| B035DRAFT_02927 | 1-acyl-sn-glycerol-3-phosphate acyltransferases( EC:2.3.1.51 )            | 142.0  | 153.9  | 152.3  | 150.2  | 157.4  | 173.3  |  | 1.07 | 4.4E-01 |
| B035DRAFT_02928 | hypothetical protein                                                      | 374.2  | 417.0  | 400.0  | 499.9  | 459.2  | 486.2  |  | 1.21 | 6.8E-02 |
| B035DRAFT_02929 | Peptidase S46.                                                            | 131.3  | 123.4  | 104.3  | 92.5   | 110.8  | 114.3  |  | 0.88 | 4.8E-01 |
| B035DRAFT_02930 | Peptidase S46.                                                            | 195.5  | 162.3  | 153.9  | 144.9  | 170.7  | 155.6  |  | 0.92 | 6.2E-01 |
| B035DRAFT_02931 | hypothetical protein                                                      | 233.7  | 254.4  | 244.3  | 312.6  | 289.9  | 284.8  |  | 1.21 | 6.1E-02 |

|                        |                                                                                                                            |             |             |             |             |             |             |  |             |                |
|------------------------|----------------------------------------------------------------------------------------------------------------------------|-------------|-------------|-------------|-------------|-------------|-------------|--|-------------|----------------|
| B035DRAFT_02932        | Septum formation initiator                                                                                                 | 176.3       | 177.2       | 148.8       | 207.2       | 188.2       | 145.8       |  | 1.07        | 7.7E-01        |
| B035DRAFT_02933        | DNA polymerase III, subunit gamma and tau( EC:2.7.7.7 )                                                                    | 155.5       | 158.2       | 155.4       | 152.0       | 171.2       | 162.6       |  | 1.03        | 5.9E-01        |
| B035DRAFT_02934        | 7-cyano-7-deazaguanine reductase( EC:1.7.1.13 )                                                                            | 177.1       | 169.7       | 157.3       | 156.8       | 167.9       | 181.1       |  | 1.00        | 9.8E-01        |
| B035DRAFT_02935        | queuosine biosynthesis protein QueC                                                                                        | 144.5       | 120.4       | 147.4       | 113.9       | 125.4       | 103.8       |  | 0.83        | 2.7E-01        |
| B035DRAFT_02936        | conserved hypothetical integral membrane protein                                                                           | 148.3       | 161.5       | 159.2       | 125.8       | 134.4       | 126.3       |  | 0.82        | 4.9E-02        |
| B035DRAFT_02937        | endonuclease III( EC:4.2.99.18 )                                                                                           | 92.2        | 98.6        | 80.9        | 79.4        | 81.7        | 85.9        |  | 0.91        | 4.2E-01        |
| B035DRAFT_02938        | Metal-dependent hydrolases of the beta-lactamase superfamily I                                                             | 165.9       | 191.6       | 190.3       | 139.1       | 175.3       | 163.0       |  | 0.87        | 3.6E-01        |
| B035DRAFT_02939        | UDP-N-acetylenolpyruvoylglucosamine reductase( EC:1.1.1.158 )                                                              | 161.9       | 164.4       | 154.9       | 112.9       | 140.3       | 100.7       |  | 0.73        | 1.5E-01        |
| B035DRAFT_02940        | hypothetical protein                                                                                                       | 142.4       | 153.0       | 145.9       | 120.0       | 131.8       | 118.6       |  | 0.84        | 7.9E-02        |
| B035DRAFT_02941        | phenylalanyl-tRNA synthetase, alpha subunit( EC:6.1.1.20 )                                                                 | 674.4       | 717.2       | 652.6       | 585.9       | 546.8       | 579.7       |  | 0.84        | 6.2E-02        |
| B035DRAFT_02942        | Arabinose efflux permease                                                                                                  | 246.3       | 236.7       | 250.8       | 202.0       | 200.2       | 210.9       |  | 0.84        | 2.5E-02        |
| B035DRAFT_02943        | hypothetical protein                                                                                                       | 259.2       | 254.1       | 253.0       | 202.7       | 216.2       | 218.9       |  | 0.83        | 2.7E-02        |
| B035DRAFT_02944        | Branched-chain amino acid aminotransferase/4-amino-4-deoxychorismate lyase( EC:4.1.3.38 )                                  | 143.3       | 162.6       | 135.7       | 104.5       | 144.1       | 138.3       |  | 0.87        | 5.0E-01        |
| B035DRAFT_02945        | Anthranilate/para-aminobenzoate synthases component I( EC:2.6.1.85 )                                                       | 213.6       | 226.7       | 204.1       | 164.1       | 225.3       | 203.9       |  | 0.91        | 6.1E-01        |
| B035DRAFT_02946        | Polysaccharide lyase family 8, super-sandwich domain./Polysaccharide lyase family 8, N terminal alpha-helical domain (PL8) | 217.0       | 200.8       | 180.9       | 111.7       | 184.4       | 144.6       |  | 0.72        | 2.8E-01        |
| B035DRAFT_02947        | hypothetical protein                                                                                                       | 259.9       | 268.1       | 233.7       | 156.7       | 193.7       | 161.9       |  | 0.67        | 6.1E-02        |
| B035DRAFT_02948        | ( tRNA )                                                                                                                   | 68.0        | 89.3        | 74.7        | 80.8        | 61.6        | 55.8        |  | 0.85        | 5.1E-01        |
| B035DRAFT_02949        | Bacterial capsule synthesis protein PGA_cap.                                                                               | 99.9        | 98.0        | 97.0        | 98.5        | 135.0       | 118.4       |  | 1.18        | 3.3E-01        |
| B035DRAFT_02950        | transcription-repair coupling factor (mfd)( EC:3.6.4. )                                                                    | 156.1       | 147.4       | 148.1       | 147.4       | 186.0       | 144.4       |  | 1.05        | 7.5E-01        |
| B035DRAFT_02951        | Predicted membrane protein                                                                                                 | 52.9        | 54.7        | 57.6        | 54.6        | 64.4        | 77.4        |  | 1.18        | 3.9E-01        |
| B035DRAFT_02952        | Tetratricopeptide repeat.                                                                                                  | 168.8       | 171.6       | 166.1       | 170.1       | 163.7       | 203.5       |  | 1.06        | 6.6E-01        |
| B035DRAFT_02953        | hypothetical protein                                                                                                       | 126.2       | 144.3       | 128.8       | 154.9       | 180.0       | 207.7       |  | 1.35        | 1.5E-01        |
| B035DRAFT_02954        | aspartate-alanine antiporter                                                                                               | 1056.7      | 916.0       | 975.4       | 949.9       | 686.2       | 664.3       |  | 0.77        | 2.7E-01        |
| B035DRAFT_02955        | aspartate 4-decarboxylase( EC:4.1.1.12 )                                                                                   | 967.2       | 883.2       | 994.9       | 1026.5      | 769.2       | 723.2       |  | 0.88        | 5.2E-01        |
| B035DRAFT_02956        | hypothetical protein                                                                                                       | 60.5        | 68.6        | 71.1        | 47.0        | 43.2        | 53.3        |  | 0.72        | 8.5E-02        |
| B035DRAFT_02957        | hypothetical protein                                                                                                       | 40.1        | 46.7        | 58.3        | 40.5        | 34.9        | 36.5        |  | 0.78        | 2.7E-01        |
| B035DRAFT_02958        | hypothetical protein                                                                                                       | 20.2        | 18.5        | 15.5        | 16.8        | 12.5        | 24.1        |  | 0.96        | 9.2E-01        |
| B035DRAFT_02959        | hypothetical protein                                                                                                       | 15.6        | 16.0        | 23.3        | 15.1        | 18.5        | 29.4        |  | 1.12        | 8.0E-01        |
| B035DRAFT_02960        | ATPase components of ABC transporters with duplicated ATPase domains                                                       | 408.7       | 403.9       | 369.7       | 305.9       | 329.6       | 296.0       |  | 0.79        | 5.7E-02        |
| B035DRAFT_02961        | Molecular chaperone GrpE (heat shock protein)                                                                              | 473.7       | 432.1       | 398.6       | 425.2       | 400.7       | 409.4       |  | 0.95        | 5.9E-01        |
| B035DRAFT_02962        | chaperone protein DnaJ                                                                                                     | 474.6       | 414.9       | 398.9       | 385.7       | 358.6       | 314.2       |  | 0.82        | 2.2E-01        |
| B035DRAFT_02963        | folylpolyglutamate synthase/dihydrofolate synthase( EC:6.3.2.12,EC:6.3.2.17 )                                              | 92.0        | 82.2        | 90.6        | 71.4        | 71.4        | 83.1        |  | 0.85        | 2.0E-01        |
| B035DRAFT_02964        | Galactose mutarotase and related enzymes( EC:5.1.3.3 )                                                                     | 279.2       | 316.0       | 279.1       | 354.8       | 399.7       | 477.8       |  | 1.40        | 1.2E-01        |
| B035DRAFT_02965        | Fucose permease                                                                                                            | 582.3       | 632.8       | 647.7       | 660.1       | 734.2       | 910.6       |  | 1.23        | 2.9E-01        |
| B035DRAFT_02966        | galactokinase( EC:2.7.1.6 )                                                                                                | 975.1       | 1019.6      | 1011.6      | 1036.8      | 1113.5      | 1367.3      |  | 1.16        | 3.4E-01        |
| B035DRAFT_02967        | hypothetical protein                                                                                                       | 78.6        | 65.5        | 84.9        | 91.1        | 109.3       | 159.0       |  | 1.54        | 2.4E-01        |
| B035DRAFT_02968        | hypothetical protein                                                                                                       | 16.4        | 20.1        | 20.0        | 16.1        | 18.8        | 16.2        |  | 0.91        | 5.2E-01        |
| B035DRAFT_02969        | DNA gyrase, B subunit( EC:5.99.1.3 )                                                                                       | 780.5       | 739.3       | 726.5       | 712.4       | 755.0       | 620.0       |  | 0.93        | 5.0E-01        |
| B035DRAFT_02970        | 4-alpha-glucanotransferase( EC:2.4.1.25 ) (CBM20)                                                                          | 36.8        | 36.3        | 38.1        | 35.8        | 39.3        | 38.8        |  | 1.02        | 6.9E-01        |
| B035DRAFT_02971        | Major Facilitator Superfamily                                                                                              | 46.4        | 57.4        | 52.9        | 61.2        | 59.3        | 56.7        |  | 1.13        | 3.2E-01        |
| B035DRAFT_02972        | hypothetical protein                                                                                                       | 50.1        | 51.8        | 45.3        | 50.7        | 58.3        | 54.6        |  | 1.11        | 3.2E-01        |
| B035DRAFT_02973        | Glycosidases (GH13)                                                                                                        | 4.5         | 3.6         | 4.9         | 8.2         | 5.3         | 5.7         |  | 1.46        | 2.4E-01        |
| B035DRAFT_02974        | Glycoside hydrolase 97.( EC:3.2.1.20 ) (GH97)                                                                              | 40.5        | 42.3        | 38.6        | 52.5        | 34.6        | 35.4        |  | 0.99        | 9.8E-01        |
| <b>B035DRAFT_02975</b> | <b>TonB-linked outer membrane protein, SusC</b>                                                                            | <b>39.9</b> | <b>36.2</b> | <b>38.0</b> | <b>54.3</b> | <b>36.7</b> | <b>43.9</b> |  | <b>1.17</b> | <b>4.6E-01</b> |
| B035DRAFT_02976        | SusD family                                                                                                                | 22.7        | 20.0        | 20.5        | 35.3        | 22.9        | 32.4        |  | 1.41        | 2.2E-01        |
| B035DRAFT_02977        | hypothetical protein                                                                                                       | 22.6        | 23.6        | 25.8        | 50.6        | 39.3        | 37.7        |  | 1.76        | 4.9E-02        |
| B035DRAFT_02978        | hypothetical protein                                                                                                       | 18.0        | 13.3        | 17.9        | 40.0        | 30.5        | 25.7        |  | 1.95        | 9.0E-02        |
| B035DRAFT_02979        | 1,4-alpha-glucan branching enzyme (GH13)                                                                                   | 7.0         | 7.0         | 7.1         | 9.9         | 9.2         | 5.7         |  | 1.14        | 6.8E-01        |

|                 |                                                                                          |        |        |        |        |        |        |      |         |
|-----------------|------------------------------------------------------------------------------------------|--------|--------|--------|--------|--------|--------|------|---------|
| B035DRAFT_02980 | RNA-binding proteins (RRM domain)                                                        | 4063.3 | 4055.1 | 3913.0 | 4344.1 | 3659.2 | 2517.8 | 0.85 | 5.9E-01 |
| B035DRAFT_02981 | hypothetical protein                                                                     | 38.4   | 43.6   | 28.0   | 29.6   | 24.7   | 27.9   | 0.76 | 3.1E-01 |
| B035DRAFT_02982 | hypothetical protein                                                                     | 111.5  | 119.2  | 111.6  | 106.1  | 110.7  | 120.3  | 0.98 | 8.5E-01 |
| B035DRAFT_02983 | Protein of unknown function (DUF3109).                                                   | 198.2  | 209.2  | 209.4  | 180.0  | 211.3  | 199.2  | 0.96 | 6.2E-01 |
| B035DRAFT_02984 | 2,3-bisphosphoglycerate-independent phosphoglycerate mutase( EC:5.4.2.1 )                | 788.8  | 821.2  | 749.6  | 664.2  | 756.6  | 807.0  | 0.94 | 6.0E-01 |
| B035DRAFT_02985 | hypothetical protein                                                                     | 20.1   | 19.4   | 16.3   | 25.2   | 26.8   | 19.3   | 1.27 | 3.0E-01 |
| B035DRAFT_02986 | Transcriptional regulators                                                               | 33.1   | 42.0   | 39.6   | 216.8  | 270.5  | 350.4  | 7.20 | 6.7E-03 |
| B035DRAFT_02987 | L-fucose isomerase( EC:5.3.1.25 )                                                        | 165.4  | 155.8  | 162.6  | 493.6  | 656.4  | 562.2  | 3.52 | 3.8E-03 |
| B035DRAFT_02988 | L-fucose:H+ symporter permease                                                           | 33.0   | 39.3   | 48.5   | 107.3  | 143.2  | 178.1  | 3.52 | 3.3E-02 |
| B035DRAFT_02989 | hypothetical protein                                                                     | 30.1   | 29.1   | 30.1   | 21.3   | 30.4   | 47.3   | 1.05 | 9.2E-01 |
| B035DRAFT_02990 | hypothetical protein                                                                     | 37.0   | 48.0   | 38.5   | 38.7   | 46.9   | 49.9   | 1.10 | 6.4E-01 |
| B035DRAFT_02991 | hypothetical protein                                                                     | 64.6   | 77.9   | 78.0   | 79.2   | 95.0   | 86.5   | 1.18 | 2.9E-01 |
| B035DRAFT_02992 | Ribonuclease HII( EC:3.1.26.4 )                                                          | 46.8   | 53.8   | 47.8   | 43.7   | 45.2   | 44.3   | 0.90 | 2.3E-01 |
| B035DRAFT_02993 | Membrane protein of unknown function (DUF340).                                           | 28.2   | 31.3   | 29.2   | 27.1   | 24.4   | 19.6   | 0.80 | 2.5E-01 |
| B035DRAFT_02994 | Predicted membrane protein                                                               | 56.6   | 55.4   | 62.4   | 45.5   | 50.8   | 56.5   | 0.87 | 3.2E-01 |
| B035DRAFT_02995 | cysteine desulfurases, SufSfamily( EC:2.8.1.7,EC:4.4.1.16 )                              | 568.4  | 508.6  | 557.3  | 500.3  | 487.6  | 405.1  | 0.85 | 2.6E-01 |
| B035DRAFT_02996 | FeS assembly protein SufD                                                                | 538.4  | 492.8  | 509.9  | 408.8  | 456.1  | 423.2  | 0.84 | 8.2E-02 |
| B035DRAFT_02997 | FeS assembly ATPase SufC                                                                 | 547.2  | 475.4  | 488.9  | 406.9  | 438.8  | 371.1  | 0.80 | 1.4E-01 |
| B035DRAFT_02998 | FeS assembly protein SufB                                                                | 392.5  | 345.4  | 345.8  | 282.5  | 311.3  | 264.0  | 0.79 | 1.1E-01 |
| B035DRAFT_02999 | Uncharacterized membrane protein, required for colicin V production                      | 173.3  | 184.3  | 155.4  | 116.8  | 174.4  | 158.1  | 0.87 | 5.4E-01 |
| B035DRAFT_03000 | translation initiation factor IF-2                                                       | 912.6  | 856.3  | 845.1  | 797.3  | 945.0  | 706.2  | 0.93 | 6.5E-01 |
| B035DRAFT_03001 | transcription termination factor NusA                                                    | 754.2  | 746.7  | 687.6  | 627.0  | 760.2  | 723.2  | 0.96 | 7.5E-01 |
| B035DRAFT_03002 | Uncharacterized protein conserved in bacteria                                            | 536.7  | 519.9  | 449.3  | 389.1  | 454.8  | 261.4  | 0.72 | 3.2E-01 |
| B035DRAFT_03003 | hypothetical protein                                                                     | 0.0    | 0.0    | 0.0    | 0.0    | 0.0    | 0.0    | 0.00 |         |
| B035DRAFT_03004 | hypothetical protein                                                                     | 60.4   | 58.3   | 50.4   | 43.6   | 42.6   | 41.9   | 0.76 | 6.8E-02 |
| B035DRAFT_03005 | Site-specific recombinase XerD                                                           | 61.6   | 51.2   | 58.0   | 39.6   | 47.4   | 34.7   | 0.71 | 1.4E-01 |
| B035DRAFT_03006 | Site-specific recombinase XerD                                                           | 67.4   | 69.9   | 81.0   | 45.7   | 49.9   | 34.1   | 0.59 | 8.9E-02 |
| B035DRAFT_03007 | Response regulator containing CheY-like receiver domain and AraC-type DNA-binding domain | 86.8   | 90.3   | 74.7   | 47.1   | 43.7   | 41.5   | 0.53 | 1.7E-02 |
| B035DRAFT_03008 | Uncharacterized protein conserved in bacteria                                            | 32.1   | 30.5   | 31.1   | 30.8   | 29.2   | 27.2   | 0.93 | 3.2E-01 |
| B035DRAFT_03009 | Uncharacterized proteins of the AP superfamily                                           | 14.6   | 11.1   | 12.8   | 12.3   | 14.0   | 9.6    | 0.92 | 7.5E-01 |
| B035DRAFT_03010 | Glycosyl Hydrolase (GH88)                                                                | 8.6    | 8.1    | 9.5    | 6.5    | 9.6    | 9.5    | 0.96 | 8.8E-01 |
| B035DRAFT_03011 | Heparinase II/III-like protein (PL12)                                                    | 6.7    | 4.4    | 6.3    | 4.8    | 4.9    | 5.4    | 0.88 | 5.9E-01 |
| B035DRAFT_03012 | SusD family                                                                              | 7.2    | 8.4    | 6.8    | 5.2    | 6.2    | 6.9    | 0.81 | 2.9E-01 |
| B035DRAFT_03013 | TonB-linked outer membrane protein, SusC/RagA family                                     | 12.7   | 12.3   | 12.4   | 7.9    | 8.8    | 8.3    | 0.67 | 7.4E-03 |
| B035DRAFT_03014 | Site-specific recombinases, DNA invertase Pin homologs                                   | 30.2   | 31.9   | 27.8   | 24.3   | 24.2   | 31.9   | 0.89 | 5.1E-01 |
| B035DRAFT_03015 | TonB-linked outer membrane protein, SusC/RagA family                                     | 17.1   | 15.0   | 15.0   | 10.7   | 9.2    | 10.4   | 0.64 | 3.3E-02 |
| B035DRAFT_03016 | SusD family                                                                              | 10.4   | 9.4    | 9.4    | 6.0    | 6.5    | 7.0    | 0.67 | 3.2E-02 |
| B035DRAFT_03017 | Signal transduction histidine kinase                                                     | 74.2   | 93.7   | 83.5   | 83.0   | 91.9   | 118.4  | 1.16 | 5.1E-01 |
| B035DRAFT_03018 | hypothetical protein                                                                     | 238.4  | 323.6  | 280.5  | 339.0  | 362.5  | 501.2  | 1.42 | 2.4E-01 |
| B035DRAFT_03019 | Transcriptional regulators                                                               | 299.3  | 380.1  | 328.4  | 452.0  | 451.1  | 591.0  | 1.48 | 1.3E-01 |
| B035DRAFT_03020 | hypothetical protein                                                                     | 76.7   | 97.5   | 93.9   | 97.9   | 102.5  | 119.0  | 1.19 | 3.2E-01 |
| B035DRAFT_03021 | Hemolysins and related proteins containing CBS domains                                   | 41.9   | 51.1   | 50.3   | 70.7   | 66.2   | 82.3   | 1.53 | 7.2E-02 |
| B035DRAFT_03022 | NTP pyrophosphohydrolases containing a Zn-finger, probably nucleic-acid-binding          | 52.4   | 47.9   | 45.8   | 69.4   | 116.4  | 67.8   | 1.68 | 1.7E-01 |
| B035DRAFT_03023 | Uncharacterized protein conserved in bacteria                                            | 117.5  | 107.6  | 105.3  | 167.8  | 200.1  | 194.8  | 1.70 | 2.2E-02 |
| B035DRAFT_03024 | Outer membrane receptor proteins, mostly Fe transport                                    | 133.6  | 123.2  | 128.3  | 185.2  | 220.9  | 226.2  | 1.64 | 2.8E-02 |
| B035DRAFT_03025 | DNA topoisomerase I, bacterial( EC:5.99.1.2 )                                            | 431.6  | 424.4  | 419.6  | 464.3  | 516.6  | 417.1  | 1.09 | 4.4E-01 |
| B035DRAFT_03026 | Shikimate kinase( EC:2.7.1.71 )                                                          | 316.4  | 335.8  | 321.2  | 293.0  | 350.6  | 282.6  | 0.95 | 6.7E-01 |
| B035DRAFT_03027 | arginine decarboxylase, biosynthetic( EC:4.1.1.19 )                                      | 315.3  | 333.3  | 314.0  | 294.0  | 332.8  | 323.9  | 0.99 | 8.7E-01 |



|                 |                                                                                                     |       |       |        |        |        |       |      |         |
|-----------------|-----------------------------------------------------------------------------------------------------|-------|-------|--------|--------|--------|-------|------|---------|
| B035DRAFT_03028 | acetylglutamate kinase( EC:2.7.2.8,EC:2.7.2.)                                                       | 199.7 | 191.3 | 193.9  | 187.0  | 209.9  | 119.4 | 0.86 | 6.3E-01 |
| B035DRAFT_03029 | RNA polymerase sigma factor, sigma-70 family                                                        | 750.6 | 683.6 | 671.1  | 1152.8 | 1146.1 | 634.0 | 1.34 | 4.2E-01 |
| B035DRAFT_03030 | hypothetical protein                                                                                | 564.5 | 539.5 | 542.9  | 815.9  | 863.5  | 585.4 | 1.36 | 2.2E-01 |
| B035DRAFT_03031 | Protein of unknown function (DUF2807).                                                              | 144.7 | 150.1 | 153.1  | 195.4  | 174.7  | 233.2 | 1.34 | 1.3E-01 |
| B035DRAFT_03032 | Predicted metal-dependent hydrolase                                                                 | 62.3  | 65.5  | 72.9   | 74.7   | 69.7   | 40.9  | 0.90 | 7.6E-01 |
| B035DRAFT_03033 | hypothetical protein                                                                                | 18.5  | 20.0  | 16.6   | 19.8   | 23.0   | 26.6  | 1.26 | 2.6E-01 |
| B035DRAFT_03034 | hypothetical protein                                                                                | 30.7  | 37.7  | 41.5   | 32.3   | 32.5   | 55.8  | 1.07 | 8.7E-01 |
| B035DRAFT_03035 | Lanthionine synthetase C-like protein.                                                              | 42.5  | 43.9  | 34.3   | 44.6   | 46.6   | 55.4  | 1.22 | 3.2E-01 |
| B035DRAFT_03036 | natural product precursor, GG-Bacteroidales family                                                  | 52.8  | 63.8  | 57.5   | 54.2   | 53.6   | 49.9  | 0.91 | 3.8E-01 |
| B035DRAFT_03037 | hypothetical protein                                                                                | 22.5  | 26.3  | 23.4   | 16.1   | 23.4   | 23.0  | 0.85 | 5.1E-01 |
| B035DRAFT_03038 | hypothetical protein                                                                                | 0.0   | 0.0   | 0.0    | 0.0    | 0.0    | 0.0   | 0.00 |         |
| B035DRAFT_03039 | riboflavin kinase/FMN adenylyltransferase( EC:2.7.7.2,EC:2.7.1.26 )                                 | 190.6 | 225.1 | 231.7  | 239.2  | 223.1  | 265.0 | 1.12 | 4.1E-01 |
| B035DRAFT_03040 | haloacid dehalogenase superfamily, subfamily IA, variant 3 with third motif having DD or ED         | 171.9 | 201.5 | 176.1  | 178.7  | 201.9  | 235.2 | 1.12 | 5.1E-01 |
| B035DRAFT_03041 | plasma-membrane calcium-translocating P-type ATPase( EC:3.6.3.8 )                                   | 184.5 | 165.9 | 168.5  | 218.7  | 223.8  | 183.1 | 1.20 | 2.1E-01 |
| B035DRAFT_03042 | ( tRNA )                                                                                            | 125.0 | 229.5 | 304.3  | 258.7  | 192.9  | 175.5 | 1.00 | 1.0E+00 |
| B035DRAFT_03043 | hypothetical protein                                                                                | 26.9  | 28.6  | 23.2   | 19.3   | 22.4   | 22.7  | 0.82 | 2.3E-01 |
| B035DRAFT_03044 | hypothetical protein                                                                                | 13.3  | 14.3  | 13.2   | 13.1   | 12.8   | 18.2  | 1.07 | 7.6E-01 |
| B035DRAFT_03045 | hypothetical protein                                                                                | 2.8   | 0.0   | 0.0    | 0.0    | 1.3    | 2.6   | 0.64 |         |
| B035DRAFT_03046 | hypothetical protein                                                                                | 6.6   | 7.0   | 3.5    | 4.2    | 6.5    | 7.0   | 1.06 | 9.1E-01 |
| B035DRAFT_03047 | hypothetical protein                                                                                | 1.6   | 2.3   | 1.0    | 0.8    | 1.1    | 1.4   | 0.72 | 5.3E-01 |
| B035DRAFT_03048 | hypothetical protein                                                                                | 1.2   | 0.9   | 1.3    | 1.4    | 1.8    | 0.7   | 1.09 | 8.8E-01 |
| B035DRAFT_03049 | hypothetical protein                                                                                | 88.2  | 67.8  | 82.5   | 29.4   | 21.8   | 35.6  | 0.36 | 4.0E-02 |
| B035DRAFT_03050 | hypothetical protein                                                                                | 9.3   | 3.6   | 12.8   | 4.6    | 6.2    | 5.6   | 0.72 | 6.4E-01 |
| B035DRAFT_03051 | hypothetical protein                                                                                | 4.0   | 3.1   | 1.6    | 1.4    | 2.4    | 4.9   | 0.94 | 9.4E-01 |
| B035DRAFT_03052 | Site-specific recombinase XerC                                                                      | 4.3   | 5.0   | 4.8    | 2.1    | 4.1    | 3.1   | 0.64 | 2.6E-01 |
| B035DRAFT_03053 | hypothetical protein                                                                                | 1.8   | 2.1   | 4.4    | 1.9    | 1.6    | 3.3   | 0.85 | 8.1E-01 |
| B035DRAFT_03054 | hypothetical protein                                                                                | 9.4   | 6.3   | 8.2    | 1.8    | 3.4    | 5.8   | 0.42 | 2.3E-01 |
| B035DRAFT_03055 | hypothetical protein                                                                                | 14.6  | 19.1  | 16.2   | 15.3   | 10.9   | 20.7  | 0.92 | 8.2E-01 |
| B035DRAFT_03056 | hypothetical protein                                                                                | 24.7  | 20.4  | 19.2   | 19.3   | 16.3   | 21.8  | 0.89 | 5.7E-01 |
| B035DRAFT_03057 | hypothetical protein                                                                                | 9.1   | 7.6   | 7.5    | 12.3   | 11.5   | 9.2   | 1.36 | 1.8E-01 |
| B035DRAFT_03058 | hypothetical protein                                                                                | 6.8   | 7.4   | 6.2    | 6.2    | 8.4    | 8.9   | 1.14 | 5.7E-01 |
| B035DRAFT_03059 | hypothetical protein                                                                                | 6.7   | 3.4   | 2.7    | 7.8    | 6.0    | 7.4   | 1.78 | 2.9E-01 |
| B035DRAFT_03060 | Cell division protein FtsI/penicillin-binding protein 2                                             | 11.7  | 7.7   | 7.9    | 10.3   | 6.9    | 11.0  | 1.03 | 9.4E-01 |
| B035DRAFT_03061 | hypothetical protein                                                                                | 6.1   | 8.1   | 6.3    | 5.7    | 3.7    | 8.0   | 0.81 | 6.4E-01 |
| B035DRAFT_03062 | hypothetical protein                                                                                | 54.0  | 57.2  | 57.5   | 95.2   | 101.2  | 127.1 | 1.90 | 3.0E-02 |
| B035DRAFT_03063 | Uncharacterized conserved protein                                                                   | 31.7  | 40.0  | 32.4   | 48.2   | 50.3   | 57.6  | 1.50 | 7.9E-02 |
| B035DRAFT_03064 | ORF6N domain.                                                                                       | 48.6  | 52.4  | 36.6   | 54.3   | 45.4   | 51.4  | 1.11 | 6.4E-01 |
| B035DRAFT_03065 | hypothetical protein                                                                                | 23.0  | 8.9   | 17.1   | 18.9   | 10.4   | 15.1  | 0.95 | 9.3E-01 |
| B035DRAFT_03066 | TonB-linked outer membrane protein, SusC/RagA family                                                | 63.8  | 65.0  | 62.5   | 34.6   | 52.1   | 63.6  | 0.76 | 4.1E-01 |
| B035DRAFT_03067 | SusD family                                                                                         | 50.1  | 44.5  | 45.7   | 26.6   | 43.8   | 55.7  | 0.86 | 7.1E-01 |
| B035DRAFT_03068 | F5/8 type C domain (CBM32)                                                                          | 97.0  | 84.3  | 84.9   | 46.5   | 87.7   | 92.2  | 0.82 | 6.2E-01 |
| B035DRAFT_03069 | Uncharacterized protein conserved in bacteria                                                       | 67.8  | 65.5  | 61.4   | 49.9   | 67.0   | 69.0  | 0.95 | 7.8E-01 |
| B035DRAFT_03070 | thioredoxin                                                                                         | 404.8 | 331.8 | 362.0  | 370.6  | 383.0  | 400.1 | 1.05 | 6.4E-01 |
| B035DRAFT_03071 | hypothetical protein                                                                                | 960.0 | 837.8 | 1041.1 | 1274.8 | 1002.3 | 767.4 | 1.05 | 8.7E-01 |
| B035DRAFT_03072 | Response regulators consisting of a CheY-like receiver domain and a winged-helix DNA-binding domain | 140.4 | 150.6 | 143.9  | 167.5  | 153.1  | 148.4 | 1.08 | 3.4E-01 |
| B035DRAFT_03073 | Signal transduction histidine kinase                                                                | 50.6  | 56.9  | 53.3   | 68.1   | 65.9   | 74.7  | 1.30 | 6.1E-02 |
| B035DRAFT_03074 | hypothetical protein                                                                                | 42.0  | 40.0  | 29.2   | 56.0   | 43.5   | 20.8  | 1.01 | 9.9E-01 |
| B035DRAFT_03075 | hypothetical protein                                                                                | 92.6  | 108.2 | 117.0  | 169.5  | 106.4  | 91.6  | 1.12 | 7.6E-01 |
| B035DRAFT_03076 | SufE protein probably involved in Fe-S center assembly                                              | 163.0 | 161.1 | 153.3  | 197.3  | 153.8  | 188.6 | 1.12 | 4.2E-01 |

|                 |                                                                                                       |         |         |         |         |         |         |      |         |
|-----------------|-------------------------------------------------------------------------------------------------------|---------|---------|---------|---------|---------|---------|------|---------|
| B035DRAFT_03077 | Predicted aminopeptidases                                                                             | 130.9   | 118.6   | 112.9   | 111.5   | 115.5   | 91.0    | 0.87 | 4.0E-01 |
| B035DRAFT_03078 | Zn-dependent dipeptidase, microsomal dipeptidase homolog                                              | 55.8    | 50.2    | 49.2    | 52.9    | 55.0    | 41.1    | 0.95 | 8.0E-01 |
| B035DRAFT_03079 | Phosphotransacetylase( EC:2.3.1.19 )                                                                  | 76.2    | 67.6    | 80.3    | 137.1   | 114.4   | 96.8    | 1.54 | 1.0E-01 |
| B035DRAFT_03080 | butyrate kinase( EC:2.7.2.7 )                                                                         | 129.1   | 99.2    | 134.1   | 139.3   | 131.4   | 94.0    | 1.00 | 1.0E+00 |
| B035DRAFT_03081 | hypothetical protein                                                                                  | 1385.7  | 1343.0  | 1265.2  | 1148.4  | 1211.9  | 1191.6  | 0.89 | 1.1E-01 |
| B035DRAFT_03082 | hypothetical protein                                                                                  | 763.9   | 960.0   | 907.1   | 1116.9  | 1103.2  | 1499.1  | 1.41 | 1.8E-01 |
| B035DRAFT_03083 | hypothetical protein                                                                                  | 16.1    | 15.6    | 22.8    | 9.9     | 8.5     | 21.9    | 0.69 | 5.1E-01 |
| B035DRAFT_03084 | hypothetical protein                                                                                  | 101.5   | 114.0   | 102.8   | 111.5   | 111.3   | 114.9   | 1.06 | 3.9E-01 |
| B035DRAFT_03085 | Transposase and inactivated derivatives                                                               | 93.4    | 112.9   | 96.4    | 84.4    | 93.2    | 91.1    | 0.89 | 3.5E-01 |
| B035DRAFT_03086 | ( tRNA )                                                                                              | 335.7   | 425.5   | 397.9   | 275.9   | 108.0   | 51.2    | 0.30 | 2.2E-01 |
| B035DRAFT_03087 | tryptophanyl-tRNA synthetase( EC:6.1.1.2 )                                                            | 289.1   | 302.9   | 284.4   | 285.0   | 298.3   | 293.9   | 1.00 | 9.8E-01 |
| B035DRAFT_03088 | hypothetical protein                                                                                  | 131.5   | 171.2   | 158.1   | 291.8   | 278.8   | 352.1   | 2.00 | 3.6E-02 |
| B035DRAFT_03089 | hypothetical protein                                                                                  | 64.2    | 95.9    | 106.8   | 113.0   | 109.2   | 155.9   | 1.43 | 3.2E-01 |
| B035DRAFT_03090 | carbamoyl-phosphate synthase, large subunit( EC:6.3.5.5 )                                             | 250.3   | 263.2   | 253.8   | 228.5   | 240.1   | 253.8   | 0.94 | 3.4E-01 |
| B035DRAFT_03091 | hypothetical protein                                                                                  | 24.4    | 27.2    | 25.2    | 33.0    | 19.3    | 36.2    | 1.11 | 7.8E-01 |
| B035DRAFT_03092 | hypothetical protein                                                                                  | 22.7    | 20.0    | 20.1    | 21.0    | 21.8    | 34.3    | 1.20 | 5.3E-01 |
| B035DRAFT_03093 | ABC-type uncharacterized transport system, ATPase component                                           | 47.7    | 59.7    | 47.5    | 43.3    | 47.9    | 42.5    | 0.87 | 3.6E-01 |
| B035DRAFT_03094 | ABC-type Na+ efflux pump, permease component                                                          | 85.5    | 81.0    | 91.6    | 73.6    | 95.1    | 82.4    | 0.97 | 8.5E-01 |
| B035DRAFT_03095 | N-acetyl-beta-hexosaminidase( EC:3.2.1.52 ) (GH20)                                                    | 131.5   | 136.4   | 126.8   | 199.1   | 199.8   | 237.2   | 1.61 | 2.5E-02 |
| B035DRAFT_03096 | Peroxiredoxin                                                                                         | 173.6   | 179.1   | 167.8   | 370.6   | 344.2   | 438.5   | 2.20 | 1.2E-02 |
| B035DRAFT_03097 | Uncharacterized protein conserved in bacteria                                                         | 71.0    | 74.9    | 79.5    | 65.8    | 55.0    | 67.0    | 0.83 | 2.0E-01 |
| B035DRAFT_03098 | Outer membrane protein and related peptidoglycan-associated (lipo)proteins                            | 2870.4  | 2509.4  | 2779.9  | 2552.8  | 2287.6  | 2642.8  | 0.92 | 4.2E-01 |
| B035DRAFT_03099 | DNA mismatch repair protein MutL                                                                      | 311.3   | 308.2   | 301.3   | 317.7   | 370.2   | 354.0   | 1.13 | 2.0E-01 |
| B035DRAFT_03100 | hypothetical protein                                                                                  | 296.3   | 279.0   | 269.9   | 301.2   | 370.2   | 356.2   | 1.21 | 1.8E-01 |
| B035DRAFT_03101 | hypothetical protein                                                                                  | 230.8   | 245.0   | 228.8   | 245.3   | 277.2   | 313.4   | 1.18 | 2.5E-01 |
| B035DRAFT_03102 | Parvulin-like peptidyl-prolyl isomerase( EC:5.2.1.8 )                                                 | 501.1   | 508.6   | 467.9   | 539.9   | 595.9   | 532.5   | 1.13 | 1.9E-01 |
| B035DRAFT_03103 | hypothetical protein                                                                                  | 267.2   | 275.8   | 262.5   | 305.1   | 318.2   | 309.2   | 1.16 | 2.5E-02 |
| B035DRAFT_03104 | Parvulin-like peptidyl-prolyl isomerase( EC:5.2.1.8 )                                                 | 201.1   | 204.1   | 191.6   | 175.8   | 223.6   | 185.5   | 0.98 | 8.7E-01 |
| B035DRAFT_03105 | inosine-5"-monophosphate dehydrogenase( EC:1.1.1.205 )                                                | 1126.2  | 1223.4  | 1175.0  | 1200.8  | 1241.6  | 1090.8  | 1.00 | 9.9E-01 |
| B035DRAFT_03106 | Lysophospholipase L1 and related esterases (CE3)                                                      | 29.4    | 26.1    | 27.4    | 26.1    | 31.1    | 26.4    | 1.01 | 9.6E-01 |
| B035DRAFT_03107 | Antirepressor regulating drug resistance, predicted signal transduction N-terminal membrane component | 101.3   | 97.8    | 106.5   | 122.3   | 116.7   | 92.4    | 1.08 | 6.5E-01 |
| B035DRAFT_03108 | Predicted transcriptional regulator                                                                   | 112.6   | 106.2   | 91.5    | 111.6   | 121.4   | 115.2   | 1.13 | 3.4E-01 |
| B035DRAFT_03109 | ATP-dependent DNA helicase RecQ( EC:3.6.4.12 )                                                        | 677.1   | 641.2   | 617.7   | 608.7   | 675.4   | 684.9   | 1.02 | 8.6E-01 |
| B035DRAFT_03110 | endopeptidase Clp ATP-binding regulatory subunit (clpX)                                               | 673.3   | 638.0   | 667.4   | 583.8   | 639.6   | 673.9   | 0.96 | 5.9E-01 |
| B035DRAFT_03111 | Protease subunit of ATP-dependent Clp proteases( EC:3.4.21.92 )                                       | 742.1   | 678.2   | 691.6   | 652.0   | 704.8   | 755.0   | 1.00 | 9.9E-01 |
| B035DRAFT_03112 | trigger factor                                                                                        | 1555.3  | 1601.7  | 1367.2  | 1287.3  | 1436.9  | 1566.4  | 0.95 | 6.9E-01 |
| B035DRAFT_03113 | hypothetical protein                                                                                  | 13862.3 | 14929.7 | 16669.1 | 20112.8 | 11843.4 | 14675.8 | 1.00 | 9.9E-01 |
| B035DRAFT_03114 | RNA-binding proteins (RRM domain)                                                                     | 16345.5 | 19536.1 | 20602.4 | 23771.5 | 14848.4 | 19115.7 | 1.01 | 9.8E-01 |
| B035DRAFT_03115 | ABC-type (unclassified) transport system, ATPase component( EC:3.6.3.)                                | 146.4   | 176.1   | 158.5   | 215.8   | 189.9   | 174.9   | 1.21 | 2.5E-01 |
| B035DRAFT_03116 | ABC-type transport system involved in resistance to organic solvents, permease component              | 275.8   | 300.7   | 292.8   | 255.3   | 248.9   | 297.4   | 0.92 | 4.5E-01 |
| B035DRAFT_03117 | ABC-type transport system involved in resistance to organic solvents, ATPase component                | 184.4   | 197.6   | 196.0   | 177.8   | 205.5   | 237.5   | 1.07 | 6.8E-01 |
| B035DRAFT_03118 | hypothetical protein                                                                                  | 78.0    | 115.8   | 110.7   | 93.5    | 87.4    | 101.4   | 0.94 | 8.0E-01 |
| B035DRAFT_03119 | ribosome-associated GTPase EngA                                                                       | 890.3   | 887.7   | 821.0   | 731.2   | 887.5   | 877.2   | 0.96 | 7.3E-01 |
| B035DRAFT_03120 | GTP-binding protein Era                                                                               | 971.4   | 963.8   | 905.4   | 809.1   | 916.5   | 1054.1  | 0.97 | 8.6E-01 |
| B035DRAFT_03121 | 3-oxoacyl-(acyl-carrier-protein) synthase III( EC:2.3.1.180 )                                         | 2533.9  | 2655.5  | 2514.1  | 2270.9  | 2362.7  | 2847.3  | 0.97 | 8.0E-01 |
| B035DRAFT_03122 | ribosomal protein L32                                                                                 | 3551.0  | 4302.0  | 3402.7  | 4022.1  | 3516.2  | 3748.9  | 1.01 | 9.7E-01 |
| B035DRAFT_03123 | Predicted metal-binding, possibly nucleic acid-binding protein                                        | 1247.6  | 1506.6  | 1296.1  | 1281.1  | 1167.7  | 1350.7  | 0.94 | 6.3E-01 |

|                 |                                                                                                                        |       |        |        |        |        |        |      |         |
|-----------------|------------------------------------------------------------------------------------------------------------------------|-------|--------|--------|--------|--------|--------|------|---------|
| B035DRAFT_03124 | ( rRNA )                                                                                                               | 6.5   | 11.9   | 7.7    | 4.1    | 7.9    | 9.3    |      | 6.8E-01 |
| B035DRAFT_03125 | ( rRNA )                                                                                                               | 897.0 | 1338.4 | 1075.0 | 1026.1 | 1182.8 | 1554.6 |      | 6.8E-01 |
| B035DRAFT_03126 | hypothetical protein                                                                                                   | 0.0   | 0.0    | 0.0    | 0.0    | 0.0    | 0.0    | 0.00 |         |
| B035DRAFT_03127 | hypothetical protein                                                                                                   | 37.2  | 47.2   | 50.8   | 72.6   | 65.3   | 78.0   | 1.61 | 8.0E-02 |
| B035DRAFT_03128 | Predicted P-loop ATPase and inactivated derivatives                                                                    | 95.5  | 94.8   | 84.2   | 102.1  | 110.4  | 98.6   | 1.13 | 2.3E-01 |
| B035DRAFT_03129 | Predicted thioesterase                                                                                                 | 143.9 | 120.4  | 144.8  | 155.4  | 157.2  | 80.1   | 0.92 | 8.5E-01 |
| B035DRAFT_03130 | Glycoside hydrolase (GH110)                                                                                            | 27.3  | 26.0   | 29.9   | 26.7   | 34.4   | 31.3   | 1.11 | 5.1E-01 |
| B035DRAFT_03131 | Beta-galactosidase (GH35)                                                                                              | 9.2   | 9.5    | 9.4    | 10.8   | 10.7   | 10.9   | 1.15 | 2.8E-03 |
| B035DRAFT_03132 | Beta-galactosidase/beta-glucuronidase (GH2)                                                                            | 5.5   | 5.0    | 5.5    | 5.0    | 5.3    | 5.7    | 1.00 | 9.7E-01 |
| B035DRAFT_03133 | Beta-galactosidase/beta-glucuronidase (GH2)                                                                            | 5.3   | 6.0    | 5.0    | 4.5    | 5.8    | 4.1    | 0.87 | 5.2E-01 |
| B035DRAFT_03134 | hypothetical protein                                                                                                   | 5.1   | 2.4    | 2.5    | 2.2    | 0.9    | 1.9    | 0.50 | 3.1E-01 |
| B035DRAFT_03135 | hypothetical protein                                                                                                   | 52.5  | 62.8   | 61.3   | 65.6   | 76.4   | 69.9   | 1.20 | 2.1E-01 |
| B035DRAFT_03136 | aconitate hydratase, mitochondrial( EC:4.2.1.3 )                                                                       | 962.1 | 552.9  | 427.5  | 518.5  | 359.1  | 430.1  | 0.71 | 4.6E-01 |
| B035DRAFT_03137 | Isocitrate dehydrogenases( EC:1.1.1.42 )                                                                               | 655.1 | 327.6  | 232.5  | 279.6  | 221.4  | 220.0  | 0.65 | 4.5E-01 |
| B035DRAFT_03138 | Citrate synthase( EC:2.3.3.1 )                                                                                         | 688.9 | 353.1  | 209.7  | 224.9  | 228.7  | 266.7  | 0.65 | 4.9E-01 |
| B035DRAFT_03139 | Predicted membrane protein( EC:1.3.99.5 )                                                                              | 289.7 | 159.7  | 119.8  | 119.2  | 157.5  | 161.1  | 0.82 | 6.9E-01 |
| B035DRAFT_03140 | NADH:flavin oxidoreductases, Old Yellow Enzyme family                                                                  | 125.8 | 61.0   | 60.1   | 57.0   | 66.0   | 50.4   | 0.74 | 5.2E-01 |
| B035DRAFT_03141 | Dehydrogenases with different specificities (related to short-chain alcohol dehydrogenases)                            | 176.0 | 129.1  | 146.6  | 100.9  | 105.5  | 96.3   | 0.68 | 8.6E-02 |
| B035DRAFT_03142 | Predicted permeases                                                                                                    | 70.2  | 63.4   | 64.1   | 67.9   | 67.9   | 59.2   | 0.99 | 9.0E-01 |
| B035DRAFT_03143 | hypothetical protein                                                                                                   | 141.2 | 158.1  | 132.8  | 156.2  | 204.7  | 212.0  | 1.32 | 2.1E-01 |
| B035DRAFT_03144 | hypothetical protein                                                                                                   | 139.5 | 150.0  | 147.5  | 136.0  | 143.3  | 166.9  | 1.02 | 8.9E-01 |
| B035DRAFT_03145 | Predicted membrane protein                                                                                             | 486.5 | 519.6  | 523.4  | 417.3  | 293.8  | 398.9  | 0.72 | 1.7E-01 |
| B035DRAFT_03146 | haloacid dehalogenase superfamily, subfamily IA, variant 1 with third motif having Dx(3-4)D or Dx(3-4)E( EC:3.1.3.18 ) | 51.1  | 52.8   | 46.7   | 63.9   | 60.9   | 57.8   | 1.21 | 8.9E-02 |
| B035DRAFT_03147 | Nitroreductase                                                                                                         | 38.8  | 42.7   | 44.7   | 54.7   | 58.7   | 52.7   | 1.32 | 5.9E-02 |
| B035DRAFT_03148 | hypothetical protein                                                                                                   | 11.0  | 7.7    | 8.9    | 12.3   | 11.9   | 15.3   | 1.44 | 1.8E-01 |
| B035DRAFT_03149 | Na <sup>+</sup> -transporting methylmalonyl-CoA/oxaloacetate decarboxylase, gamma subunit( EC:4.1.1.3 )                | 144.1 | 152.7  | 146.8  | 182.8  | 174.4  | 165.7  | 1.18 | 6.5E-02 |
| B035DRAFT_03150 | Pyruvate/oxaloacetate carboxyltransferase( EC:6.4.1.1 )                                                                | 172.6 | 158.6  | 164.0  | 168.5  | 201.2  | 156.7  | 1.06 | 6.9E-01 |
| B035DRAFT_03151 | sodium ion-translocating decarboxylase, beta subunit( EC:4.1.1.3 )                                                     | 210.3 | 206.7  | 206.1  | 177.1  | 235.6  | 252.6  | 1.06 | 7.9E-01 |
| B035DRAFT_03152 | Enoyl-[acyl-carrier-protein] reductase (NADH)( EC:1.3.1.9 )                                                            | 825.7 | 848.6  | 839.5  | 646.0  | 679.4  | 755.1  | 0.83 | 9.0E-02 |
| B035DRAFT_03153 | hypothetical protein                                                                                                   | 538.2 | 540.0  | 496.0  | 386.1  | 400.9  | 424.2  | 0.77 | 3.5E-02 |
| B035DRAFT_03154 | Predicted methyltransferases( EC:2.1.1.198 )                                                                           | 203.2 | 212.0  | 212.3  | 140.5  | 170.5  | 162.2  | 0.75 | 7.0E-02 |
| B035DRAFT_03155 | N-acetyl-beta-hexosaminidase( EC:3.2.1.52 ) (GH20)                                                                     | 134.5 | 137.2  | 137.2  | 109.1  | 143.1  | 148.9  | 0.97 | 8.8E-01 |
| B035DRAFT_03156 | hypothetical protein                                                                                                   | 13.7  | 16.4   | 14.9   | 14.9   | 9.2    | 17.8   | 0.90 | 7.8E-01 |
| B035DRAFT_03157 | hypothetical protein                                                                                                   | 8.8   | 9.1    | 10.2   | 7.9    | 12.3   | 12.6   | 1.14 | 6.4E-01 |
| B035DRAFT_03158 | hypothetical protein                                                                                                   | 0.0   | 0.0    | 0.0    | 0.0    | 0.0    | 0.0    | 0.00 |         |
| B035DRAFT_03159 | Uncharacterized conserved protein                                                                                      | 164.8 | 182.3  | 178.1  | 220.2  | 213.1  | 261.2  | 1.32 | 9.8E-02 |
| B035DRAFT_03160 | hypothetical protein                                                                                                   | 64.8  | 88.4   | 104.5  | 87.4   | 93.2   | 103.6  | 1.12 | 6.7E-01 |
| B035DRAFT_03161 | Site-specific recombinase XerD                                                                                         | 14.5  | 16.8   | 17.1   | 14.4   | 17.9   | 19.1   | 1.05 | 7.8E-01 |
| B035DRAFT_03162 | Uncharacterized conserved protein                                                                                      | 46.4  | 48.1   | 44.0   | 53.4   | 53.4   | 65.4   | 1.24 | 1.7E-01 |
| B035DRAFT_03163 | cAMP-binding proteins - catabolite gene activator and regulatory subunit of cAMP-dependent protein kinases             | 43.6  | 49.7   | 44.5   | 38.8   | 45.2   | 51.4   | 0.98 | 9.0E-01 |
| B035DRAFT_03164 | cAMP-binding proteins - catabolite gene activator and regulatory subunit of cAMP-dependent protein kinases             | 40.7  | 35.5   | 39.7   | 24.0   | 27.2   | 38.7   | 0.76 | 3.3E-01 |
| B035DRAFT_03165 | Acetyltransferases                                                                                                     | 59.8  | 80.0   | 71.8   | 89.7   | 78.3   | 110.9  | 1.31 | 2.9E-01 |
| B035DRAFT_03166 | hypothetical protein                                                                                                   | 67.3  | 71.6   | 73.5   | 89.8   | 93.6   | 117.6  | 1.41 | 1.0E-01 |
| B035DRAFT_03167 | hypothetical protein                                                                                                   | 51.1  | 58.5   | 70.0   | 73.6   | 79.6   | 100.5  | 1.41 | 2.0E-01 |
| B035DRAFT_03168 | hypothetical protein                                                                                                   | 40.6  | 54.7   | 58.6   | 66.6   | 54.7   | 77.6   | 1.29 | 3.6E-01 |
| B035DRAFT_03169 | hypothetical protein                                                                                                   | 22.1  | 28.1   | 19.6   | 24.7   | 18.8   | 26.2   | 1.00 | 1.0E+00 |

|                 |                                                                                                        |        |        |        |        |        |        |      |         |
|-----------------|--------------------------------------------------------------------------------------------------------|--------|--------|--------|--------|--------|--------|------|---------|
| B035DRAFT_03170 | hypothetical protein                                                                                   | 25.3   | 22.0   | 22.0   | 18.2   | 20.4   | 30.0   | 0.97 | 9.2E-01 |
| B035DRAFT_03171 | hypothetical protein                                                                                   | 22.8   | 32.4   | 24.1   | 14.4   | 19.3   | 20.7   | 0.69 | 2.3E-01 |
| B035DRAFT_03172 | hypothetical protein                                                                                   | 40.6   | 44.5   | 40.5   | 31.1   | 36.4   | 27.1   | 0.75 | 1.5E-01 |
| B035DRAFT_03173 | Relaxase/Mobilisation nuclease domain.                                                                 | 32.6   | 22.2   | 26.1   | 21.0   | 28.4   | 12.0   | 0.72 | 5.2E-01 |
| B035DRAFT_03174 | Bacterial mobilisation protein (MobC).                                                                 | 20.7   | 10.7   | 26.2   | 14.4   | 15.6   | 6.4    | 0.63 | 5.1E-01 |
| B035DRAFT_03175 | DNA primase (bacterial type)                                                                           | 36.4   | 29.7   | 31.3   | 28.3   | 34.9   | 23.2   | 0.88 | 5.9E-01 |
| B035DRAFT_03176 | hypothetical protein                                                                                   | 47.7   | 42.1   | 40.4   | 40.2   | 40.1   | 27.7   | 0.82 | 4.2E-01 |
| B035DRAFT_03177 | DNA binding domain, excisionase family                                                                 | 45.8   | 51.1   | 40.7   | 37.0   | 50.5   | 36.2   | 0.89 | 6.2E-01 |
| B035DRAFT_03178 | hypothetical protein                                                                                   | 68.9   | 76.9   | 84.3   | 60.3   | 64.2   | 82.6   | 0.89 | 5.8E-01 |
| B035DRAFT_03179 | ( tRNA )                                                                                               | 64.1   | 128.7  | 186.7  | 167.6  | 86.2   | 30.0   | 0.66 | 7.0E-01 |
| B035DRAFT_03180 | Mannose-1-phosphate guanylyltransferase( EC:2.7.7.22 )                                                 | 173.1  | 205.0  | 180.2  | 223.3  | 260.2  | 346.0  | 1.46 | 1.9E-01 |
| B035DRAFT_03181 | Diadenosine tetraphosphate (Ap4A) hydrolase and other HIT family hydrolases                            | 931.8  | 986.9  | 1094.9 | 1210.3 | 1037.5 | 1329.2 | 1.18 | 3.1E-01 |
| B035DRAFT_03182 | transcription elongation factor GreA                                                                   | 1440.4 | 1484.3 | 1415.0 | 1750.3 | 1636.6 | 1663.3 | 1.16 | 4.2E-02 |
| B035DRAFT_03183 | Glutathione peroxidase                                                                                 | 140.8  | 173.3  | 145.4  | 168.1  | 176.6  | 206.0  | 1.20 | 2.9E-01 |
| B035DRAFT_03184 | polyribonucleotide nucleotidyltransferase( EC:2.7.7.8 )                                                | 1778.4 | 1693.3 | 1644.6 | 1744.0 | 1666.7 | 1795.4 | 1.02 | 7.7E-01 |
| B035DRAFT_03185 | Rubredoxin                                                                                             | 324.5  | 367.7  | 246.7  | 396.6  | 371.2  | 277.3  | 1.12 | 7.1E-01 |
| B035DRAFT_03186 | Site-specific recombinase XerD                                                                         | 17.6   | 12.3   | 16.2   | 15.0   | 15.4   | 7.4    | 0.79 | 6.2E-01 |
| B035DRAFT_03187 | hypothetical protein                                                                                   | 12.8   | 8.7    | 13.6   | 8.1    | 9.9    | 4.0    | 0.60 | 3.7E-01 |
| B035DRAFT_03188 | DNA binding domain, excisionase family                                                                 | 13.9   | 5.8    | 10.9   | 12.9   | 11.9   | 2.0    | 0.71 | 7.8E-01 |
| B035DRAFT_03189 | hypothetical protein                                                                                   | 3.6    | 2.2    | 2.5    | 2.2    | 3.3    | 0.7    | 0.64 | 6.1E-01 |
| B035DRAFT_03190 | hypothetical protein                                                                                   | 6.6    | 2.3    | 3.2    | 5.0    | 4.5    | 0.9    | 0.74 | 8.0E-01 |
| B035DRAFT_03191 | Topoisomerase IA( EC:5.99.1.2 )                                                                        | 6.0    | 3.5    | 6.6    | 7.0    | 5.8    | 1.7    | 0.78 | 8.0E-01 |
| B035DRAFT_03192 | Domain of unknown function (DUF1896).                                                                  | 27.0   | 20.6   | 33.1   | 37.3   | 30.9   | 11.0   | 0.88 | 8.8E-01 |
| B035DRAFT_03193 | Helicase conserved C-terminal domain./SNF2 family N-terminal domain./N-6 DNA Methylase.                | 8.5    | 5.2    | 8.8    | 10.1   | 9.0    | 3.2    | 0.90 | 9.0E-01 |
| B035DRAFT_03194 | hypothetical protein( EC:5.3.3.1 )                                                                     | 98.5   | 117.4  | 112.0  | 146.8  | 154.7  | 178.7  | 1.46 | 6.8E-02 |
| B035DRAFT_03195 | Acetyltransferases                                                                                     | 38.5   | 51.4   | 48.5   | 56.8   | 59.2   | 81.8   | 1.42 | 2.3E-01 |
| B035DRAFT_03196 | small GTP-binding protein domain                                                                       | 89.8   | 93.5   | 88.8   | 93.2   | 93.6   | 108.1  | 1.08 | 4.1E-01 |
| B035DRAFT_03197 | Signal transduction histidine kinase                                                                   | 73.9   | 58.8   | 64.0   | 70.0   | 71.4   | 52.8   | 0.98 | 9.4E-01 |
| B035DRAFT_03198 | Response regulator containing CheY-like receiver, AAA-type ATPase, and DNA-binding domains             | 64.2   | 50.5   | 60.5   | 57.1   | 49.5   | 23.6   | 0.70 | 4.8E-01 |
| B035DRAFT_03199 | ribosomal protein S20                                                                                  | 5896.4 | 8782.4 | 6976.7 | 5458.2 | 4080.4 | 4330.5 | 0.64 | 1.6E-01 |
| B035DRAFT_03200 | ( tRNA )                                                                                               | 221.4  | 338.0  | 221.9  | 88.7   | 89.2   | 53.3   | 0.29 | 5.2E-02 |
| B035DRAFT_03201 | DNA repair protein RecO                                                                                | 54.2   | 60.6   | 65.7   | 74.2   | 62.4   | 57.3   | 1.07 | 6.9E-01 |
| B035DRAFT_03202 | Uncharacterized conserved protein                                                                      | 889.7  | 813.4  | 740.5  | 952.0  | 849.7  | 613.7  | 0.97 | 9.3E-01 |
| B035DRAFT_03203 | cell division protein FtsZ                                                                             | 225.7  | 211.5  | 193.6  | 206.5  | 231.1  | 176.2  | 0.97 | 8.6E-01 |
| B035DRAFT_03204 | cell division protein FtsA                                                                             | 214.7  | 199.3  | 182.7  | 207.3  | 223.2  | 219.4  | 1.09 | 3.7E-01 |
| B035DRAFT_03205 | hypothetical protein                                                                                   | 172.8  | 179.9  | 149.8  | 170.4  | 177.6  | 199.7  | 1.09 | 5.1E-01 |
| B035DRAFT_03206 | UDP-N-acetylmuramate--alanine ligase( EC:6.3.2.8 )                                                     | 226.5  | 235.4  | 230.4  | 222.1  | 243.3  | 271.7  | 1.06 | 5.8E-01 |
| B035DRAFT_03207 | undecaprenyldiphospho-muramoylpentapeptide beta-N-acetylglucosaminyltransferase( EC:2.4.1.227 ) (GT28) | 190.1  | 218.8  | 192.8  | 215.2  | 215.9  | 199.7  | 1.05 | 6.0E-01 |
| B035DRAFT_03208 | Bacterial cell division membrane protein                                                               | 271.5  | 282.7  | 285.5  | 309.7  | 289.8  | 309.0  | 1.08 | 1.7E-01 |
| B035DRAFT_03209 | UDP-N-acetylmuramoylalanine--D-glutamate ligase( EC:6.3.2.9 )                                          | 251.4  | 264.3  | 239.0  | 235.4  | 267.8  | 288.4  | 1.05 | 7.1E-01 |
| B035DRAFT_03210 | phospho-N-acetylmuramoyl-pentapeptide-transferase( EC:2.7.8.13 )                                       | 230.6  | 245.7  | 224.8  | 246.9  | 245.8  | 289.6  | 1.11 | 3.4E-01 |
| B035DRAFT_03211 | UDP-N-acetylmuramyl-tripeptide synthetase( EC:6.3.2.13 )                                               | 269.2  | 266.5  | 261.2  | 303.5  | 297.1  | 334.0  | 1.17 | 8.5E-02 |
| B035DRAFT_03212 | Cell division protein FtsI/penicillin-binding protein 2( EC:2.4.1.129 )                                | 171.9  | 187.6  | 168.1  | 201.7  | 199.3  | 212.1  | 1.16 | 9.9E-02 |
| B035DRAFT_03213 | hypothetical protein                                                                                   | 116.2  | 125.2  | 102.2  | 136.9  | 145.4  | 175.9  | 1.33 | 1.7E-01 |
| B035DRAFT_03214 | S-adenosyl-methyltransferase MraW( EC:2.1.1.199 )                                                      | 261.8  | 264.2  | 250.7  | 328.1  | 316.3  | 318.5  | 1.24 | 1.1E-02 |
| B035DRAFT_03215 | Uncharacterized protein conserved in bacteria                                                          | 250.3  | 282.5  | 243.6  | 328.5  | 333.6  | 283.6  | 1.22 | 1.8E-01 |
| B035DRAFT_03216 | Putative hemolysin                                                                                     | 276.4  | 310.7  | 286.6  | 224.5  | 237.3  | 253.4  | 0.82 | 9.2E-02 |

|                 |                                                                                                          |        |        |        |        |        |        |  |      |         |
|-----------------|----------------------------------------------------------------------------------------------------------|--------|--------|--------|--------|--------|--------|--|------|---------|
| B035DRAFT_03217 | hypothetical protein                                                                                     | 219.9  | 272.4  | 249.3  | 184.0  | 203.7  | 235.7  |  | 0.84 | 3.3E-01 |
| B035DRAFT_03218 | deoxyguanosinetriphosphate triphosphohydrolase, putative( EC:3.1.5.1 )                                   | 59.5   | 62.7   | 65.3   | 68.5   | 65.0   | 65.1   |  | 1.06 | 3.4E-01 |
| B035DRAFT_03219 | deoxyuridine 5"-triphosphate nucleotidohydrolase (dut)( EC:3.6.1.23 )                                    | 69.5   | 84.4   | 74.7   | 109.1  | 115.8  | 75.9   |  | 1.30 | 3.3E-01 |
| B035DRAFT_03220 | hypothetical protein                                                                                     | 174.2  | 179.8  | 196.2  | 257.7  | 241.1  | 211.0  |  | 1.29 | 1.1E-01 |
| B035DRAFT_03221 | hypothetical protein                                                                                     | 186.4  | 183.5  | 184.0  | 239.4  | 233.7  | 181.7  |  | 1.17 | 3.4E-01 |
| B035DRAFT_03222 | Membrane-bound metallopeptidase                                                                          | 135.2  | 125.0  | 136.4  | 161.7  | 154.7  | 117.5  |  | 1.08 | 6.7E-01 |
| B035DRAFT_03223 | hypothetical protein                                                                                     | 39.6   | 59.0   | 57.6   | 65.8   | 67.5   | 46.1   |  | 1.15 | 6.7E-01 |
| B035DRAFT_03224 | hypothetical protein                                                                                     | 53.2   | 48.5   | 49.0   | 55.4   | 61.4   | 50.8   |  | 1.11 | 3.7E-01 |
| B035DRAFT_03225 | Acetylornithine deacetylase/Succinyl-diaminopimelate desuccinylase and related deacylases( EC:3.5.1.16 ) | 140.8  | 142.3  | 130.9  | 146.6  | 149.5  | 151.4  |  | 1.08 | 1.8E-01 |
| B035DRAFT_03226 | Long-chain acyl-CoA synthetases (AMP-forming)( EC:6.2.1.3 )                                              | 434.2  | 448.1  | 414.4  | 338.1  | 386.5  | 399.2  |  | 0.86 | 2.0E-01 |
| B035DRAFT_03227 | Protein chain release factor B                                                                           | 270.7  | 265.0  | 229.6  | 199.0  | 245.8  | 180.0  |  | 0.81 | 3.0E-01 |
| B035DRAFT_03228 | hypothetical protein                                                                                     | 158.7  | 154.7  | 147.9  | 138.8  | 187.9  | 161.7  |  | 1.05 | 7.7E-01 |
| B035DRAFT_03229 | Uncharacterized protein conserved in bacteria                                                            | 61.9   | 61.0   | 46.3   | 59.3   | 68.3   | 64.6   |  | 1.14 | 4.7E-01 |
| B035DRAFT_03230 | Outer membrane receptor proteins, mostly Fe transport                                                    | 176.7  | 191.2  | 196.1  | 187.9  | 237.5  | 273.8  |  | 1.23 | 3.4E-01 |
| B035DRAFT_03231 | RNA polymerase sigma factor, sigma-70 family                                                             | 2274.4 | 2610.0 | 2288.4 | 2971.9 | 2346.7 | 3224.3 |  | 1.18 | 3.9E-01 |
| B035DRAFT_03232 | VanZ like family                                                                                         | 260.2  | 265.9  | 267.7  | 254.6  | 210.9  | 311.8  |  | 0.97 | 8.8E-01 |
| B035DRAFT_03233 | Na+-dependent transporters of the SNF family                                                             | 286.7  | 291.5  | 302.7  | 264.1  | 235.4  | 279.4  |  | 0.88 | 2.3E-01 |
| B035DRAFT_03234 | hypothetical protein                                                                                     | 195.9  | 218.2  | 221.4  | 226.1  | 181.1  | 236.8  |  | 1.01 | 9.7E-01 |
| B035DRAFT_03235 | Alkaline phosphatase( EC:3.1.3.1 )                                                                       | 118.0  | 123.3  | 108.6  | 126.5  | 126.3  | 134.3  |  | 1.11 | 2.3E-01 |
| B035DRAFT_03236 | hypothetical protein                                                                                     | 28.0   | 34.9   | 30.8   | 22.7   | 30.0   | 25.7   |  | 0.84 | 3.5E-01 |
| B035DRAFT_03237 | hypothetical protein                                                                                     | 67.8   | 66.1   | 63.6   | 82.0   | 72.1   | 46.7   |  | 0.99 | 9.8E-01 |
| B035DRAFT_03238 | hypothetical protein                                                                                     | 5.1    | 3.3    | 4.1    | 7.7    | 5.1    | 7.2    |  | 1.60 | 2.0E-01 |
| B035DRAFT_03239 | ( tRNA )                                                                                                 | 817.2  | 1324.1 | 1725.0 | 1009.3 | 496.6  | 296.7  |  | 0.43 | 2.9E-01 |
| B035DRAFT_03240 | Predicted esterase of the alpha-beta hydrolase superfamily                                               | 9.7    | 10.6   | 11.8   | 17.4   | 16.5   | 22.7   |  | 1.75 | 6.4E-02 |
| B035DRAFT_03241 | Molecular chaperone, HSP90 family                                                                        | 213.5  | 205.6  | 196.2  | 231.7  | 235.7  | 319.9  |  | 1.27 | 2.6E-01 |
| B035DRAFT_03242 | ATPases with chaperone activity, ATP-binding subunit                                                     | 157.0  | 138.4  | 141.3  | 177.1  | 176.9  | 214.9  |  | 1.30 | 1.3E-01 |
| B035DRAFT_03243 | hypothetical protein                                                                                     | 0.0    | 0.0    | 1.4    | 0.0    | 1.1    | 1.1    |  | 0.75 |         |
| B035DRAFT_03244 | DNA gyrase, A subunit( EC:5.99.1.3 )                                                                     | 509.0  | 523.4  | 536.2  | 516.7  | 552.4  | 614.0  |  | 1.07 | 4.7E-01 |
| B035DRAFT_03245 | hypothetical protein                                                                                     | 1036.6 | 1118.2 | 1007.5 | 916.0  | 942.1  | 1233.7 |  | 0.97 | 8.8E-01 |
| B035DRAFT_03246 | Universal stress protein UspA and related nucleotide-binding proteins                                    | 150.4  | 163.8  | 165.1  | 167.9  | 145.8  | 212.2  |  | 1.09 | 6.9E-01 |
| B035DRAFT_03247 | hypothetical protein                                                                                     | 252.5  | 310.7  | 260.5  | 363.5  | 422.9  | 506.1  |  | 1.56 | 1.0E-01 |
| B035DRAFT_03248 | Membrane-associated phospholipid phosphatase                                                             | 115.7  | 135.6  | 130.4  | 142.2  | 129.3  | 187.8  |  | 1.19 | 4.3E-01 |
| B035DRAFT_03249 | Tetratricopeptide repeat.                                                                                | 265.8  | 314.2  | 307.7  | 354.5  | 368.6  | 469.2  |  | 1.34 | 1.8E-01 |
| B035DRAFT_03250 | hypothetical protein                                                                                     | 229.2  | 242.5  | 232.7  | 278.4  | 287.0  | 329.7  |  | 1.27 | 8.2E-02 |
| B035DRAFT_03251 | Tetratricopeptide repeat.                                                                                | 233.6  | 224.9  | 207.6  | 251.4  | 301.9  | 297.7  |  | 1.27 | 1.2E-01 |
| B035DRAFT_03252 | Mg-chelatase subunit ChID                                                                                | 272.5  | 274.7  | 257.6  | 322.3  | 339.0  | 384.9  |  | 1.30 | 7.4E-02 |
| B035DRAFT_03253 | Mg-chelatase subunit ChID                                                                                | 233.7  | 241.6  | 249.8  | 268.3  | 272.5  | 290.4  |  | 1.15 | 8.0E-02 |
| B035DRAFT_03254 | hypothetical protein                                                                                     | 349.6  | 374.8  | 383.4  | 409.1  | 407.4  | 449.4  |  | 1.14 | 1.5E-01 |
| B035DRAFT_03255 | Uncharacterized conserved protein (some members contain a von Willebrand factor type A (vWA) domain)     | 461.7  | 452.8  | 487.7  | 544.3  | 523.6  | 564.5  |  | 1.16 | 6.6E-02 |
| B035DRAFT_03256 | MoxR-like ATPases( EC:3.6.3.)                                                                            | 575.3  | 575.7  | 568.2  | 709.2  | 704.3  | 764.5  |  | 1.27 | 1.9E-02 |
| B035DRAFT_03257 | Bacterial nucleoid DNA-binding protein (CBM50)                                                           | 209.5  | 213.0  | 191.8  | 178.4  | 203.1  | 212.8  |  | 0.97 | 7.7E-01 |
| B035DRAFT_03258 | Bacterial nucleoid DNA-binding protein                                                                   | 213.5  | 232.3  | 211.6  | 181.7  | 203.6  | 231.7  |  | 0.93 | 6.3E-01 |
| B035DRAFT_03259 | ribosomal protein S12 methylthiotransferase RimO( EC:2.)                                                 | 293.2  | 313.7  | 305.6  | 260.6  | 289.2  | 312.6  |  | 0.94 | 5.6E-01 |
| B035DRAFT_03260 | signal recognition particle-docking protein FtsY                                                         | 300.5  | 309.5  | 277.7  | 258.3  | 254.7  | 287.4  |  | 0.90 | 2.9E-01 |
| B035DRAFT_03261 | hypothetical protein                                                                                     | 2536.0 | 3341.9 | 2698.6 | 2373.3 | 2082.9 | 2826.4 |  | 0.85 | 4.6E-01 |
| B035DRAFT_03262 | ribosomal protein L33, bacterial type                                                                    | 5103.5 | 5797.4 | 4115.4 | 4023.2 | 3711.5 | 4598.4 |  | 0.83 | 3.8E-01 |
| B035DRAFT_03263 | ribosomal protein L28                                                                                    | 4669.7 | 5176.9 | 3420.4 | 3673.7 | 3181.6 | 3608.1 |  | 0.80 | 3.6E-01 |
| B035DRAFT_03264 | competence/damage-inducible protein CinA C-terminal domain                                               | 152.4  | 149.3  | 125.1  | 132.4  | 159.5  | 140.7  |  | 1.01 | 9.3E-01 |
| B035DRAFT_03265 | putative glycoprotease GCP( EC:3.4.24.57 )                                                               | 186.5  | 201.0  | 190.6  | 189.2  | 191.4  | 235.7  |  | 1.06 | 6.6E-01 |

|                 |                                                                                                 |        |        |        |        |        |        |      |         |
|-----------------|-------------------------------------------------------------------------------------------------|--------|--------|--------|--------|--------|--------|------|---------|
| B035DRAFT_03266 | methionine aminopeptidase, type I( EC:3.4.11.18 )                                               | 207.1  | 209.9  | 191.4  | 228.0  | 231.4  | 239.7  | 1.15 | 8.3E-02 |
| B035DRAFT_03267 | Predicted P-loop ATPase and inactivated derivatives                                             | 100.0  | 76.8   | 101.6  | 118.0  | 98.0   | 44.7   | 0.87 | 8.2E-01 |
| B035DRAFT_03268 | hypothetical protein                                                                            | 62.1   | 63.9   | 76.1   | 67.2   | 63.1   | 73.3   | 1.01 | 9.5E-01 |
| B035DRAFT_03269 | CRISPR-associated endoribonuclease Cas2                                                         | 78.4   | 66.8   | 55.1   | 37.3   | 46.3   | 65.4   | 0.73 | 3.8E-01 |
| B035DRAFT_03270 | CRISPR-associated endonuclease Cas1                                                             | 83.5   | 71.5   | 76.8   | 60.2   | 63.7   | 64.5   | 0.81 | 8.9E-02 |
| B035DRAFT_03271 | CRISPR-associated protein Cas4                                                                  | 92.1   | 87.6   | 88.3   | 83.6   | 89.2   | 86.4   | 0.97 | 4.6E-01 |
| B035DRAFT_03272 | CRISPR-associated protein Cas7/Csd2, subtype I-C/DVULG                                          | 101.9  | 107.5  | 94.0   | 92.5   | 100.7  | 90.5   | 0.94 | 4.7E-01 |
| B035DRAFT_03273 | CRISPR-associated protein Cas8c/Csd1, subtype I-C/DVULG                                         | 74.5   | 85.7   | 75.0   | 58.4   | 60.7   | 78.8   | 0.84 | 3.6E-01 |
| B035DRAFT_03274 | CRISPR-associated protein Cas5, subtype I-C/DVULG                                               | 85.7   | 91.2   | 76.7   | 68.1   | 77.9   | 72.4   | 0.86 | 2.4E-01 |
| B035DRAFT_03275 | CRISPR-associated helicase Cas3/CRISPR-associated endonuclease Cas3-HD                          | 82.7   | 87.2   | 79.7   | 67.4   | 74.0   | 79.6   | 0.88 | 2.5E-01 |
| B035DRAFT_03276 | hypothetical protein                                                                            | 21.0   | 25.8   | 25.6   | 20.6   | 24.1   | 20.8   | 0.91 | 5.2E-01 |
| B035DRAFT_03277 | hypothetical protein                                                                            | 1468.8 | 1520.1 | 1357.5 | 1369.8 | 1447.6 | 1631.3 | 1.02 | 8.6E-01 |
| B035DRAFT_03278 | hypothetical protein                                                                            | 69.2   | 57.0   | 62.5   | 64.7   | 67.0   | 45.5   | 0.93 | 7.7E-01 |
| B035DRAFT_03279 | hypothetical protein                                                                            | 14.1   | 10.5   | 5.5    | 4.7    | 9.7    | 6.1    | 0.70 | 5.8E-01 |
| B035DRAFT_03280 | hypothetical protein                                                                            | 9.9    | 4.9    | 6.4    | 4.8    | 4.8    | 3.2    | 0.62 | 3.1E-01 |
| B035DRAFT_03281 | hypothetical protein                                                                            | 8.4    | 6.0    | 5.7    | 3.0    | 3.4    | 2.1    | 0.42 | 7.2E-02 |
| B035DRAFT_03282 | hypothetical protein                                                                            | 24.3   | 20.6   | 21.2   | 20.4   | 22.8   | 17.8   | 0.92 | 6.0E-01 |
| B035DRAFT_03283 | hypothetical protein                                                                            | 19.9   | 16.0   | 19.9   | 16.5   | 17.3   | 12.9   | 0.83 | 4.0E-01 |
| B035DRAFT_03284 | hypothetical protein                                                                            | 15.2   | 7.1    | 9.3    | 8.8    | 15.2   | 8.3    | 1.04 | 9.5E-01 |
| B035DRAFT_03285 | hypothetical protein                                                                            | 5.7    | 7.2    | 4.1    | 5.5    | 4.8    | 6.9    | 1.03 | 9.5E-01 |
| B035DRAFT_03286 | hypothetical protein                                                                            | 5.3    | 2.9    | 4.6    | 3.2    | 3.5    | 2.8    | 0.76 | 4.4E-01 |
| B035DRAFT_03287 | Rhomboid family                                                                                 | 4.6    | 2.3    | 4.4    | 3.1    | 3.5    | 4.7    | 1.05 | 9.3E-01 |
| B035DRAFT_03288 | hypothetical protein                                                                            | 7.8    | 2.7    | 5.2    | 7.0    | 3.9    | 6.4    | 1.16 | 8.3E-01 |
| B035DRAFT_03289 | hypothetical protein                                                                            | 1.9    | 0.7    | 0.3    | 0.9    | 0.4    | 0.4    | 0.71 | 7.8E-01 |
| B035DRAFT_03290 | hypothetical protein                                                                            | 2.2    | 1.9    | 2.1    | 1.1    | 3.2    | 1.4    | 0.81 | 7.3E-01 |
| B035DRAFT_03291 | hypothetical protein                                                                            | 1.7    | 1.6    | 1.6    | 1.1    | 0.3    | 0.9    | 0.41 | 2.5E-01 |
| B035DRAFT_03292 | hypothetical protein                                                                            | 1.3    | 1.5    | 0.6    | 0.3    | 1.0    | 0.5    | 0.46 | 3.5E-01 |
| B035DRAFT_03293 | hypothetical protein                                                                            | 9.2    | 7.6    | 8.5    | 8.7    | 7.7    | 5.4    | 0.84 | 5.4E-01 |
| B035DRAFT_03294 | Phage-related protein                                                                           | 67.1   | 63.2   | 59.6   | 80.9   | 71.0   | 73.9   | 1.19 | 1.4E-01 |
| B035DRAFT_03295 | Predicted transcriptional regulator with C-terminal CBS domains                                 | 88.3   | 90.6   | 76.4   | 107.2  | 105.5  | 95.0   | 1.21 | 1.7E-01 |
| B035DRAFT_03296 | Reverse transcriptase (RNA-dependent DNA polymerase).                                           | 94.0   | 91.7   | 87.4   | 95.9   | 92.5   | 89.9   | 1.02 | 7.2E-01 |
| B035DRAFT_03297 | hypothetical protein                                                                            | 320.9  | 318.8  | 290.7  | 343.4  | 376.0  | 353.9  | 1.15 | 1.3E-01 |
| B035DRAFT_03298 | hypothetical protein                                                                            | 0.0    | 0.0    | 0.0    | 0.0    | 0.0    | 0.0    | 0.00 |         |
| B035DRAFT_03299 | hypothetical protein                                                                            | 0.0    | 0.0    | 0.0    | 0.0    | 0.0    | 0.0    | 0.00 |         |
| B035DRAFT_03300 | ( tRNA )                                                                                        | 341.1  | 448.8  | 528.6  | 473.4  | 213.8  | 118.6  | 0.53 | 4.1E-01 |
| B035DRAFT_03301 | ( tRNA )                                                                                        | 341.1  | 448.8  | 528.6  | 473.4  | 213.8  | 118.6  | 0.53 | 4.1E-01 |
| B035DRAFT_03302 | Activator of Hsp90 ATPase homolog 1-like protein.                                               | 462.9  | 439.5  | 395.4  | 331.9  | 315.0  | 349.8  | 0.77 | 7.0E-02 |
| B035DRAFT_03303 | Predicted permeases                                                                             | 243.2  | 246.2  | 239.9  | 232.4  | 207.9  | 244.5  | 0.94 | 4.6E-01 |
| B035DRAFT_03304 | GTP cyclohydrolase II/3,4-dihydroxy-2-butanone 4-phosphate synthase( EC:4.1.99.12,EC:3.5.4.25 ) | 271.7  | 279.9  | 262.9  | 305.6  | 310.2  | 286.8  | 1.11 | 1.3E-01 |
| B035DRAFT_03305 | Aspartate/tyrosine/aromatic aminotransferase( EC:2.6.1.1 )                                      | 331.8  | 414.4  | 346.7  | 386.2  | 433.3  | 450.0  | 1.16 | 3.3E-01 |
| B035DRAFT_03306 | hypothetical protein                                                                            | 4961.1 | 7935.2 | 8109.6 | 7300.4 | 6137.8 | 7198.2 | 1.00 | 9.9E-01 |
| B035DRAFT_03307 | Beta-glucosidase-related glycosidases (GH3)                                                     | 99.3   | 94.1   | 101.7  | 108.9  | 112.8  | 91.4   | 1.06 | 6.6E-01 |
| B035DRAFT_03308 | ribosomal protein L19, bacterial type                                                           | 6342.3 | 6755.1 | 5966.3 | 6101.3 | 5452.9 | 6134.4 | 0.93 | 4.3E-01 |
| B035DRAFT_03309 | Uncharacterized conserved protein( EC:5.1.3.)                                                   | 163.7  | 180.3  | 164.4  | 168.7  | 207.7  | 189.7  | 1.11 | 4.0E-01 |
| B035DRAFT_03310 | Transcriptional regulator/sugar kinase( EC:2.7.1.2 )                                            | 147.3  | 175.1  | 174.7  | 164.6  | 194.0  | 192.9  | 1.11 | 4.6E-01 |
| B035DRAFT_03311 | ABC-type antimicrobial peptide transport system, ATPase component                               | 56.3   | 55.1   | 50.2   | 62.7   | 71.2   | 81.5   | 1.33 | 1.3E-01 |
| B035DRAFT_03312 | ABC-type antimicrobial peptide transport system, permease component                             | 37.3   | 29.6   | 32.5   | 44.1   | 54.3   | 48.5   | 1.48 | 8.2E-02 |
| B035DRAFT_03313 | ABC-type antimicrobial peptide transport system, permease component                             | 28.4   | 28.5   | 30.4   | 40.9   | 50.7   | 49.8   | 1.61 | 3.6E-02 |
| B035DRAFT_03314 | RND family efflux transporter, MFP subunit                                                      | 30.3   | 25.6   | 25.6   | 45.0   | 60.0   | 51.0   | 1.91 | 3.8E-02 |

|                        |                                                                                             |             |             |             |              |              |              |             |                |
|------------------------|---------------------------------------------------------------------------------------------|-------------|-------------|-------------|--------------|--------------|--------------|-------------|----------------|
| B035DRAFT_03315        | Outer membrane protein                                                                      | 37.0        | 34.8        | 33.5        | 43.8         | 61.1         | 66.8         | 1.61        | 1.2E-01        |
| B035DRAFT_03316        | hypothetical protein                                                                        | 16.0        | 16.7        | 16.4        | 17.8         | 14.2         | 16.1         | 0.98        | 8.6E-01        |
| B035DRAFT_03317        | hypothetical protein                                                                        | 10.3        | 12.4        | 13.5        | 13.4         | 11.9         | 9.0          | 0.94        | 8.1E-01        |
| B035DRAFT_03318        | RNA polymerase sigma factor, sigma-70 family                                                | 17.0        | 17.7        | 16.3        | 19.1         | 17.6         | 23.0         | 1.16        | 3.3E-01        |
| B035DRAFT_03319        | hypothetical protein                                                                        | 47.4        | 45.8        | 49.1        | 49.1         | 44.3         | 53.5         | 1.03        | 8.0E-01        |
| B035DRAFT_03320        | Uncharacterized protein conserved in bacteria                                               | 302.8       | 300.2       | 267.2       | 287.0        | 325.5        | 235.1        | 0.97        | 8.7E-01        |
| B035DRAFT_03321        | Uncharacterized oxidoreductases, Fe-dependent alcohol dehydrogenase family( EC:1.1.1.)      | 433.3       | 359.6       | 396.9       | 564.3        | 558.3        | 519.7        | 1.38        | 5.4E-02        |
| B035DRAFT_03322        | hypothetical protein                                                                        | 547.5       | 585.6       | 601.3       | 742.5        | 628.0        | 696.2        | 1.19        | 1.6E-01        |
| B035DRAFT_03323        | Protein of unknown function (DUF1812).                                                      | 323.8       | 301.5       | 328.8       | 376.6        | 343.0        | 342.7        | 1.11        | 2.0E-01        |
| B035DRAFT_03324        | ABC-type antimicrobial peptide transport system, ATPase component( EC:3.6.3.)               | 230.1       | 233.0       | 263.2       | 266.5        | 220.6        | 166.8        | 0.89        | 6.4E-01        |
| B035DRAFT_03325        | Dinucleotide-utilizing enzymes involved in molybdopterin and thiamine biosynthesis family 1 | 110.7       | 102.9       | 106.9       | 93.2         | 95.9         | 68.6         | 0.80        | 2.8E-01        |
| B035DRAFT_03326        | Kef-type K+ transport systems, membrane components                                          | 106.4       | 101.3       | 98.8        | 86.3         | 103.1        | 77.5         | 0.87        | 3.6E-01        |
| B035DRAFT_03327        | aspartate-semialdehyde dehydrogenase (peptidoglycan organisms)( EC:1.2.1.11 )               | 704.4       | 801.6       | 778.5       | 735.2        | 733.2        | 759.7        | 0.98        | 7.6E-01        |
| B035DRAFT_03328        | FKBP-type peptidyl-prolyl cis-trans isomerases 1                                            | 1048.0      | 1089.0      | 1153.7      | 1217.5       | 1168.0       | 1183.8       | 1.09        | 2.0E-01        |
| B035DRAFT_03329        | glycyl-tRNA synthetase, dimeric type( EC:6.1.1.14 )                                         | 668.8       | 679.6       | 668.1       | 715.2        | 705.8        | 750.8        | 1.08        | 1.1E-01        |
| B035DRAFT_03330        | Type IIA topoisomerase (DNA gyrase/topo II, topoisomerase IV), A subunit( EC:5.99.1.)       | 107.5       | 107.4       | 106.4       | 133.2        | 135.7        | 152.0        | 1.31        | 3.7E-02        |
| B035DRAFT_03331        | Protein of unknown function (DUF3316).                                                      | 73.7        | 88.4        | 80.7        | 83.4         | 82.2         | 101.6        | 1.10        | 5.4E-01        |
| B035DRAFT_03332        | Periplasmic protease                                                                        | 73.8        | 80.7        | 79.9        | 77.7         | 77.2         | 96.1         | 1.07        | 6.5E-01        |
| B035DRAFT_03333        | ( tRNA )                                                                                    | 164.8       | 220.3       | 263.2       | 321.0        | 112.0        | 58.0         | 0.60        | 5.9E-01        |
| B035DRAFT_03334        | Signal transduction histidine kinase                                                        | 86.9        | 88.1        | 85.7        | 81.3         | 78.3         | 99.3         | 0.99        | 9.3E-01        |
| B035DRAFT_03335        | AraC-type DNA-binding domain-containing proteins                                            | 66.9        | 77.6        | 77.2        | 77.4         | 77.5         | 87.9         | 1.10        | 4.3E-01        |
| B035DRAFT_03336        | membrane protein, MarC family                                                               | 37.5        | 46.3        | 37.6        | 37.8         | 39.4         | 46.4         | 1.02        | 9.2E-01        |
| B035DRAFT_03337        | ( rRNA )                                                                                    | 6.5         | 11.9        | 7.7         | 4.1          | 7.9          | 9.3          |             | 6.9E-01        |
| <b>B035DRAFT_03338</b> | <b>TonB-linked outer membrane protein, SusC/RagA family</b>                                 | <b>76.7</b> | <b>69.6</b> | <b>66.3</b> | <b>140.4</b> | <b>212.1</b> | <b>230.6</b> | <b>2.69</b> | <b>4.1E-02</b> |
| B035DRAFT_03339        | SusD family                                                                                 | 84.0        | 89.7        | 82.5        | 211.2        | 315.3        | 380.2        | 3.44        | 3.0E-02        |
| B035DRAFT_03340        | alpha-1,2-mannosidase, putative (GH92)                                                      | 123.6       | 103.3       | 117.4       | 140.2        | 146.4        | 117.9        | 1.17        | 3.2E-01        |
| B035DRAFT_03341        | Peptide-N-glycosidase F, N terminal./Peptide-N-glycosidase F, C terminal.                   | 145.7       | 127.9       | 158.9       | 191.3        | 140.0        | 70.3         | 0.86        | 7.9E-01        |
| B035DRAFT_03342        | hypothetical protein                                                                        | 113.6       | 121.6       | 160.3       | 100.6        | 112.1        | 107.8        | 0.82        | 3.3E-01        |
| B035DRAFT_03343        | glutamate 5-kinase( EC:2.7.2.11 )                                                           | 163.8       | 118.8       | 146.5       | 170.6        | 156.8        | 58.7         | 0.82        | 7.7E-01        |
| B035DRAFT_03344        | gamma-glutamyl phosphate reductase( EC:1.2.1.41 )                                           | 214.4       | 160.3       | 226.4       | 194.2        | 150.9        | 57.3         | 0.60        | 4.7E-01        |
| B035DRAFT_03345        | Ornithine carbamoyltransferase( EC:2.1.3.11 )                                               | 285.5       | 275.2       | 291.0       | 281.9        | 272.1        | 172.1        | 0.83        | 5.2E-01        |
| B035DRAFT_03346        | Transposase and inactivated derivatives                                                     | 53.9        | 49.9        | 58.4        | 47.1         | 48.3         | 52.4         | 0.91        | 3.7E-01        |
| B035DRAFT_03347        | Rhodanese-related sulfurtransferase                                                         | 104.6       | 112.2       | 90.2        | 107.9        | 95.9         | 87.7         | 0.95        | 7.6E-01        |
| B035DRAFT_03348        | hypothetical protein                                                                        | 278.4       | 327.6       | 384.1       | 483.4        | 350.7        | 316.2        | 1.15        | 6.2E-01        |
| B035DRAFT_03349        | hypothetical protein                                                                        | 76.7        | 82.6        | 78.6        | 75.7         | 93.8         | 85.6         | 1.07        | 5.8E-01        |
| B035DRAFT_03350        | D-alanine--D-alanine ligase( EC:6.3.2.4 )                                                   | 85.2        | 90.6        | 80.7        | 72.0         | 93.3         | 97.6         | 1.02        | 9.3E-01        |
| B035DRAFT_03351        | pseudouridine synthase, RluA family( EC:5.4.99.23 )                                         | 115.4       | 118.3       | 100.7       | 91.2         | 112.9        | 84.2         | 0.86        | 4.1E-01        |
| B035DRAFT_03352        | Uncharacterized protein conserved in bacteria                                               | 104.2       | 115.6       | 90.6        | 80.6         | 105.9        | 70.1         | 0.82        | 4.3E-01        |
| B035DRAFT_03353        | Uncharacterized conserved protein                                                           | 159.9       | 149.5       | 141.9       | 139.9        | 144.3        | 137.1        | 0.93        | 3.4E-01        |
| B035DRAFT_03354        | Arylsulfatase A and related enzymes                                                         | 99.5        | 109.5       | 105.9       | 118.7        | 125.5        | 146.8        | 1.24        | 1.6E-01        |
| B035DRAFT_03355        | N-acetyl-beta-hexosaminidase( EC:3.2.1.52 ) (GH20)                                          | 118.8       | 116.5       | 107.6       | 119.8        | 129.5        | 95.0         | 1.00        | 9.9E-01        |
| B035DRAFT_03356        | Beta-galactosidase/beta-glucuronidase( EC:3.2.1.23 ) (GH2)                                  | 101.5       | 91.8        | 93.8        | 100.6        | 118.2        | 91.2         | 1.07        | 6.3E-01        |
| B035DRAFT_03357        | Alpha-L-fucosidase( EC:3.2.1.51 ) (GH29)                                                    | 188.1       | 160.9       | 168.3       | 175.6        | 182.8        | 132.6        | 0.94        | 7.8E-01        |
| B035DRAFT_03358        | anaerobic sulfatase-maturing enzyme                                                         | 90.8        | 84.1        | 78.0        | 92.5         | 100.2        | 86.9         | 1.11        | 3.7E-01        |
| B035DRAFT_03359        | ribosomal protein L34, bacterial type                                                       | 1249.6      | 1679.2      | 1054.1      | 1463.6       | 1038.5       | 1265.6       | 0.95        | 8.9E-01        |
| B035DRAFT_03360        | hypothetical protein                                                                        | 84.5        | 134.4       | 46.9        | 113.9        | 69.8         | 74.1         | 1.03        | 9.6E-01        |

|                 |                                                                                            |       |        |        |       |       |       |  |      |         |
|-----------------|--------------------------------------------------------------------------------------------|-------|--------|--------|-------|-------|-------|--|------|---------|
| B035DRAFT_03361 | translation elongation factor P                                                            | 972.1 | 1233.9 | 1059.7 | 757.4 | 676.2 | 752.2 |  | 0.67 | 6.2E-02 |
| B035DRAFT_03362 | Glycosyltransferases, probably involved in cell wall biogenesis (GT2)                      | 124.0 | 131.7  | 124.2  | 127.9 | 134.1 | 98.2  |  | 0.94 | 7.4E-01 |
| B035DRAFT_03363 | DNA repair protein radc                                                                    | 81.5  | 79.4   | 81.3   | 61.1  | 73.9  | 70.1  |  | 0.84 | 1.7E-01 |
| B035DRAFT_03364 | Highly conserved protein containing a thioredoxin domain (GH88)                            | 72.5  | 81.2   | 81.7   | 85.7  | 87.7  | 86.1  |  | 1.10 | 2.2E-01 |
| B035DRAFT_03365 | hypothetical protein                                                                       | 5.4   | 7.6    | 9.2    | 2.3   | 6.9   | 4.9   |  | 0.59 | 4.2E-01 |
| B035DRAFT_03366 | hypothetical protein                                                                       | 95.1  | 94.3   | 92.4   | 252.2 | 242.8 | 271.4 |  | 2.72 | 3.3E-04 |
| B035DRAFT_03367 | hypothetical protein                                                                       | 0.0   | 0.0    | 0.0    | 0.0   | 0.0   | 0.0   |  | 0.00 |         |
| B035DRAFT_03368 | Transposase DDE domain.                                                                    | 208.0 | 227.9  | 251.6  | 140.2 | 128.0 | 154.4 |  | 0.61 | 4.0E-02 |
| B035DRAFT_03369 | hypothetical protein                                                                       | 48.8  | 51.3   | 42.5   | 16.1  | 18.1  | 24.1  |  | 0.40 | 3.3E-02 |
| B035DRAFT_03370 | Saccharopine dehydrogenase and related proteins                                            | 36.5  | 30.1   | 27.5   | 8.4   | 13.3  | 12.0  |  | 0.35 | 3.9E-02 |
| B035DRAFT_03371 | Saccharopine dehydrogenase and related proteins                                            | 20.1  | 22.6   | 15.2   | 8.0   | 9.0   | 7.6   |  | 0.43 | 3.5E-02 |
| B035DRAFT_03372 | hypothetical protein                                                                       | 11.3  | 14.1   | 9.9    | 2.2   | 4.2   | 6.8   |  | 0.34 | 1.5E-01 |
| B035DRAFT_03373 | Methylase involved in ubiquinone/menaquinone biosynthesis                                  | 17.2  | 23.0   | 23.8   | 7.4   | 8.9   | 12.2  |  | 0.44 | 7.4E-02 |
| B035DRAFT_03374 | hypothetical protein                                                                       | 13.5  | 15.1   | 15.8   | 7.1   | 6.1   | 8.2   |  | 0.48 | 2.6E-02 |
| B035DRAFT_03375 | hypothetical protein                                                                       | 6.6   | 6.5    | 5.6    | 4.6   | 2.9   | 2.4   |  | 0.51 | 1.3E-01 |
| B035DRAFT_03376 | ABC-type multidrug transport system, ATPase and permease components                        | 12.6  | 15.0   | 12.6   | 4.7   | 5.6   | 7.2   |  | 0.43 | 4.2E-02 |
| B035DRAFT_03377 | ABC-type multidrug transport system, ATPase and permease components                        | 15.1  | 15.8   | 16.7   | 8.9   | 9.0   | 9.4   |  | 0.57 | 3.0E-03 |
| B035DRAFT_03378 | hypothetical protein                                                                       | 111.8 | 131.6  | 131.6  | 131.7 | 117.8 | 169.3 |  | 1.11 | 6.4E-01 |
| B035DRAFT_03379 | Predicted ATP-binding protein involved in virulence                                        | 211.1 | 205.1  | 196.9  | 225.9 | 243.6 | 334.3 |  | 1.29 | 2.8E-01 |
| B035DRAFT_03380 | hypothetical protein                                                                       | 9.8   | 16.5   | 16.0   | 10.7  | 10.6  | 16.1  |  | 0.89 | 7.7E-01 |
| B035DRAFT_03381 | Methylase involved in ubiquinone/menaquinone biosynthesis                                  | 43.5  | 47.0   | 47.5   | 41.6  | 39.8  | 64.3  |  | 1.03 | 9.2E-01 |
| B035DRAFT_03382 | Site-specific recombinase XerD                                                             | 9.5   | 7.6    | 9.8    | 5.6   | 6.2   | 8.3   |  | 0.74 | 2.9E-01 |
| B035DRAFT_03383 | DNA primase (bacterial type)                                                               | 6.1   | 4.5    | 4.5    | 3.5   | 4.1   | 3.2   |  | 0.72 | 1.8E-01 |
| B035DRAFT_03384 | hypothetical protein                                                                       | 15.1  | 9.2    | 16.7   | 11.1  | 11.2  | 9.6   |  | 0.80 | 5.2E-01 |
| B035DRAFT_03385 | hypothetical protein                                                                       | 6.7   | 5.8    | 4.1    | 3.5   | 3.0   | 6.6   |  | 0.76 | 5.9E-01 |
| B035DRAFT_03386 | hypothetical protein                                                                       | 2.9   | 0.7    | 2.8    | 3.0   | 4.2   | 1.0   |  | 1.35 | 8.1E-01 |
| B035DRAFT_03387 | Orotate phosphoribosyltransferase                                                          | 5.0   | 5.2    | 7.4    | 7.4   | 5.5   | 2.0   |  | 0.75 | 7.1E-01 |
| B035DRAFT_03388 | hypothetical protein                                                                       | 5.2   | 4.7    | 4.9    | 3.6   | 6.3   | 3.7   |  | 0.89 | 7.3E-01 |
| B035DRAFT_03389 | Uncharacterized conserved protein                                                          | 167.0 | 134.8  | 193.6  | 192.2 | 150.7 | 37.5  |  | 0.63 | 6.2E-01 |
| B035DRAFT_03390 | PRTRC system ThiF family protein                                                           | 82.5  | 69.7   | 111.9  | 77.0  | 68.3  | 23.5  |  | 0.58 | 4.5E-01 |
| B035DRAFT_03391 | hypothetical protein                                                                       | 23.6  | 22.7   | 29.3   | 30.1  | 18.5  | 9.8   |  | 0.71 | 5.6E-01 |
| B035DRAFT_03392 | hypothetical protein                                                                       | 7.0   | 4.2    | 5.9    | 7.5   | 5.2   | 3.2   |  | 0.89 | 8.4E-01 |
| B035DRAFT_03393 | PRTRC system protein C                                                                     | 2.3   | 2.7    | 0.9    | 4.8   | 0.0   | 0.0   |  | 2.71 |         |
| B035DRAFT_03394 | PRTRC system protein E                                                                     | 5.5   | 4.8    | 7.5    | 4.2   | 5.6   | 2.2   |  | 0.64 | 4.2E-01 |
| B035DRAFT_03395 | hypothetical protein                                                                       | 34.6  | 24.3   | 35.2   | 28.8  | 24.1  | 17.5  |  | 0.74 | 3.9E-01 |
| B035DRAFT_03396 | hypothetical protein                                                                       | 42.0  | 37.8   | 33.8   | 35.9  | 24.4  | 18.0  |  | 0.67 | 3.1E-01 |
| B035DRAFT_03397 | Topoisomerase IA( EC:5.99.1.2 )                                                            | 30.3  | 16.5   | 26.2   | 26.7  | 20.6  | 4.6   |  | 0.58 | 6.0E-01 |
| B035DRAFT_03398 | hypothetical protein                                                                       | 20.8  | 12.1   | 15.6   | 18.7  | 11.7  | 3.9   |  | 0.60 | 5.6E-01 |
| B035DRAFT_03399 | hypothetical protein                                                                       | 20.5  | 14.9   | 15.9   | 15.4  | 14.0  | 5.9   |  | 0.64 | 4.4E-01 |
| B035DRAFT_03400 | hypothetical protein                                                                       | 21.4  | 19.7   | 24.8   | 16.9  | 16.3  | 21.2  |  | 0.82 | 3.3E-01 |
| B035DRAFT_03401 | Response regulator containing CheY-like receiver, AAA-type ATPase, and DNA-binding domains | 34.2  | 27.1   | 31.0   | 29.8  | 29.3  | 15.8  |  | 0.78 | 5.4E-01 |
| B035DRAFT_03402 | Signal transduction histidine kinase                                                       | 37.0  | 32.5   | 27.2   | 26.4  | 28.0  | 17.3  |  | 0.73 | 3.5E-01 |
| B035DRAFT_03403 | hypothetical protein                                                                       | 0.0   | 0.0    | 0.0    | 0.0   | 0.0   | 0.0   |  | 0.00 |         |
| B035DRAFT_03404 | Laminin G domain.                                                                          | 37.6  | 36.8   | 34.1   | 43.2  | 48.7  | 39.2  |  | 1.20 | 2.0E-01 |
| B035DRAFT_03405 | DNA/RNA endonuclease G, NUC1                                                               | 54.7  | 57.2   | 46.7   | 68.8  | 60.1  | 42.4  |  | 1.06 | 8.5E-01 |
| B035DRAFT_03406 | Alpha-L-fucosidase( EC:3.2.1.51 ) (GH29)                                                   | 111.7 | 96.4   | 110.9  | 118.9 | 127.3 | 91.0  |  | 1.05 | 8.3E-01 |
| B035DRAFT_03407 | Uncharacterized protein conserved in bacteria (CBM9)                                       | 175.1 | 164.1  | 174.9  | 181.9 | 182.0 | 126.6 |  | 0.94 | 8.0E-01 |
| B035DRAFT_03408 | hypothetical protein                                                                       | 41.7  | 49.3   | 40.6   | 45.4  | 56.1  | 37.9  |  | 1.05 | 8.5E-01 |
| B035DRAFT_03409 | ( tRNA )                                                                                   | 13.9  | 21.5   | 14.1   | 26.8  | 23.1  | 8.4   |  | 1.07 | 9.3E-01 |
| B035DRAFT_03410 | Glutamine phosphoribosylpyrophosphate amidotransferase( EC:2.4.2.14 )                      | 135.6 | 110.0  | 118.4  | 113.8 | 135.1 | 71.1  |  | 0.85 | 6.6E-01 |



|                 |                                                                              |        |        |        |        |        |        |      |         |
|-----------------|------------------------------------------------------------------------------|--------|--------|--------|--------|--------|--------|------|---------|
| B035DRAFT_03411 | carbamoyl-phosphate synthase, small subunit( EC:6.3.5.5 )                    | 155.0  | 150.1  | 137.8  | 164.9  | 182.3  | 112.6  | 1.02 | 9.5E-01 |
| B035DRAFT_03412 | carbamoyl-phosphate synthase, large subunit( EC:6.3.5.5 )                    | 197.6  | 192.2  | 201.5  | 265.2  | 279.7  | 201.5  | 1.25 | 2.7E-01 |
| B035DRAFT_03413 | PAS domain S-box                                                             | 83.5   | 86.6   | 74.8   | 93.3   | 106.7  | 91.0   | 1.19 | 2.0E-01 |
| B035DRAFT_03414 | Alpha-glucosidases, family 31 of glycosyl hydrolases (GH31)                  | 369.7  | 375.9  | 349.9  | 277.0  | 376.4  | 396.3  | 0.95 | 8.0E-01 |
| B035DRAFT_03415 | Molecular chaperone (small heat shock protein)                               | 1467.1 | 1063.3 | 1144.3 | 1431.9 | 1724.7 | 1688.7 | 1.33 | 2.2E-01 |
| B035DRAFT_03416 | Alanyl-tRNA synthetase                                                       | 51.6   | 52.1   | 63.3   | 58.9   | 45.8   | 55.7   | 0.96 | 8.3E-01 |
| B035DRAFT_03417 | Acetyltransferases, including N-acetylases of ribosomal proteins( EC:2.3.1.) | 64.0   | 60.1   | 58.8   | 61.2   | 56.3   | 60.1   | 0.97 | 6.6E-01 |
| B035DRAFT_03418 | Penicillin V acylase and related amidases( EC:3.5.1.24 )                     | 262.1  | 215.8  | 238.5  | 274.8  | 243.7  | 234.3  | 1.05 | 7.1E-01 |
| B035DRAFT_03419 | hypothetical protein                                                         | 45.0   | 38.0   | 31.5   | 33.2   | 30.6   | 32.8   | 0.85 | 4.1E-01 |
| B035DRAFT_03420 | hypothetical protein                                                         | 234.5  | 265.7  | 238.3  | 260.1  | 231.6  | 261.2  | 1.02 | 8.6E-01 |
| B035DRAFT_03421 | HpaII restriction endonuclease.( EC:3.1.21.4 )                               | 108.6  | 120.6  | 117.0  | 97.0   | 101.2  | 78.1   | 0.79 | 2.0E-01 |
| B035DRAFT_03422 | Glycoside hydrolase (GH13)                                                   | 214.1  | 198.3  | 204.0  | 178.7  | 199.6  | 185.7  | 0.91 | 2.5E-01 |
| B035DRAFT_03423 | Predicted esterase of the alpha-beta hydrolase superfamily                   | 112.8  | 130.9  | 112.2  | 116.5  | 129.6  | 152.9  | 1.12 | 5.1E-01 |
| B035DRAFT_03424 | hypothetical protein                                                         | 232.3  | 296.5  | 298.3  | 265.0  | 278.2  | 313.1  | 1.04 | 8.4E-01 |
| B035DRAFT_03425 | malonyl CoA-acyl carrier protein transacylase( EC:2.3.1.39 )                 | 905.6  | 960.1  | 859.0  | 961.4  | 926.4  | 801.3  | 0.98 | 9.1E-01 |
| B035DRAFT_03426 | phosphomethylpyrimidine kinase( EC:2.7.1.49,EC:2.7.4.7 )                     | 21.6   | 24.3   | 27.3   | 34.6   | 36.1   | 34.6   | 1.45 | 5.6E-02 |
| B035DRAFT_03427 | Nucleoside-diphosphate-sugar epimerases( EC:4.2.1.46 )                       | 112.3  | 116.3  | 106.8  | 105.3  | 133.1  | 104.0  | 1.01 | 9.3E-01 |
| B035DRAFT_03428 | Signal transduction histidine kinase( EC:2.7.13.3 )                          | 162.9  | 149.2  | 176.1  | 135.0  | 161.6  | 129.7  | 0.87 | 3.7E-01 |
| B035DRAFT_03429 | hypothetical protein                                                         | 0.0    | 0.0    | 0.0    | 0.0    | 0.0    | 0.0    | 0.00 |         |
| B035DRAFT_03430 | AraC-type DNA-binding domain-containing proteins                             | 14.3   | 20.8   | 21.9   | 12.5   | 18.3   | 23.4   | 0.94 | 8.8E-01 |
| B035DRAFT_03431 | hypothetical protein                                                         | 62.8   | 62.5   | 68.2   | 35.8   | 40.3   | 51.8   | 0.65 | 1.1E-01 |
| B035DRAFT_03432 | hypothetical protein                                                         | 13.8   | 12.4   | 15.5   | 13.4   | 17.3   | 22.2   | 1.25 | 4.4E-01 |
| B035DRAFT_03433 | glutaminase A( EC:3.5.1.2 )                                                  | 79.8   | 98.7   | 80.9   | 95.0   | 106.1  | 116.1  | 1.23 | 2.5E-01 |
| B035DRAFT_03434 | 1-hydroxy-2-methyl-2-(E)-butenyl 4-diphosphate synthase( EC:1.17.7.1 )       | 123.8  | 132.9  | 126.8  | 148.3  | 156.2  | 146.4  | 1.18 | 5.0E-02 |
| B035DRAFT_03435 | phosphoribosylaminoimidazole carboxylase, PurE protein( EC:5.4.99.18 )       | 496.8  | 534.8  | 538.9  | 441.8  | 513.1  | 539.1  | 0.95 | 6.6E-01 |
| B035DRAFT_03436 | glycine cleavage system H protein                                            | 541.8  | 577.2  | 547.6  | 512.5  | 598.4  | 701.9  | 1.08 | 6.5E-01 |
| B035DRAFT_03437 | hypothetical protein                                                         | 123.7  | 134.5  | 137.3  | 137.5  | 138.0  | 167.8  | 1.12 | 4.1E-01 |
| B035DRAFT_03438 | RNA polymerase sigma-54 factor                                               | 97.7   | 106.0  | 97.5   | 118.2  | 119.4  | 121.7  | 1.19 | 4.2E-02 |
| B035DRAFT_03439 | Uridine kinase( EC:2.7.1.48 )                                                | 86.7   | 91.8   | 81.1   | 162.1  | 176.9  | 225.4  | 2.16 | 2.8E-02 |
| B035DRAFT_03440 | Na/Pi-cotransporter                                                          | 167.1  | 185.0  | 178.3  | 133.8  | 148.5  | 149.6  | 0.81 | 8.0E-02 |
| B035DRAFT_03441 | Na/Pi-cotransporter                                                          | 198.0  | 231.8  | 232.5  | 178.1  | 181.1  | 199.9  | 0.85 | 2.0E-01 |
| B035DRAFT_03442 | FKBP-type peptidyl-prolyl cis-trans isomerases 1( EC:5.2.1.8 )               | 1862.7 | 1827.9 | 1906.3 | 1772.9 | 1581.8 | 1866.7 | 0.93 | 4.3E-01 |
| B035DRAFT_03443 | FKBP-type peptidyl-prolyl cis-trans isomerases 1( EC:5.2.1.8 )               | 1139.7 | 1042.2 | 967.0  | 1063.0 | 1047.5 | 898.8  | 0.96 | 7.3E-01 |
| B035DRAFT_03444 | NAD-dependent protein deacetylases, SIR2 family( EC:3.5.1.)                  | 69.8   | 74.7   | 74.4   | 72.0   | 75.4   | 69.2   | 0.99 | 8.6E-01 |
| B035DRAFT_03445 | hypothetical protein                                                         | 10.0   | 9.8    | 10.0   | 9.9    | 10.0   | 6.6    | 0.87 | 5.8E-01 |
| B035DRAFT_03446 | hypothetical protein                                                         | 9.6    | 6.0    | 6.3    | 5.4    | 8.4    | 5.9    | 0.91 | 8.0E-01 |
| B035DRAFT_03447 | hypothetical protein                                                         | 4.6    | 1.8    | 3.2    | 1.6    | 3.1    | 4.1    | 0.92 | 9.2E-01 |
| B035DRAFT_03448 | hypothetical protein                                                         | 3.2    | 2.1    | 2.4    | 2.9    | 2.9    | 1.1    | 0.83 | 7.8E-01 |
| B035DRAFT_03449 | hypothetical protein                                                         | 3.4    | 2.7    | 3.4    | 2.3    | 2.3    | 1.4    | 0.62 | 2.0E-01 |
| B035DRAFT_03450 | hypothetical protein                                                         | 1.3    | 2.3    | 4.0    | 1.7    | 3.6    | 1.8    | 0.97 | 9.8E-01 |
| B035DRAFT_03451 | hypothetical protein                                                         | 2.9    | 1.7    | 3.1    | 2.7    | 1.0    | 2.0    | 0.70 | 5.8E-01 |
| B035DRAFT_03452 | hypothetical protein                                                         | 2.1    | 4.0    | 2.5    | 1.4    | 1.9    | 1.9    | 0.63 | 2.6E-01 |
| B035DRAFT_03453 | hypothetical protein                                                         | 2.2    | 2.5    | 3.7    | 2.0    | 4.0    | 2.7    | 1.02 | 9.7E-01 |
| B035DRAFT_03454 | hypothetical protein                                                         | 2.7    | 4.0    | 3.2    | 2.4    | 4.8    | 2.8    | 0.98 | 9.7E-01 |
| B035DRAFT_03455 | hypothetical protein                                                         | 16.6   | 9.9    | 17.4   | 14.2   | 13.4   | 6.6    | 0.76 | 6.2E-01 |
| B035DRAFT_03456 | hypothetical protein                                                         | 23.3   | 16.0   | 15.1   | 12.9   | 20.2   | 7.9    | 0.72 | 5.4E-01 |
| B035DRAFT_03457 | DNA primase (bacterial type)                                                 | 29.2   | 18.6   | 30.1   | 21.0   | 22.2   | 7.0    | 0.58 | 4.6E-01 |
| B035DRAFT_03458 | Conjugative transposon protein TraO.                                         | 22.3   | 11.8   | 15.0   | 18.7   | 18.9   | 3.7    | 0.69 | 7.3E-01 |
| B035DRAFT_03459 | Bacteroides conjugative transposon TraN protein                              | 32.4   | 19.6   | 27.0   | 23.9   | 26.7   | 8.9    | 0.69 | 5.9E-01 |
| B035DRAFT_03460 | Bacteroides conjugative transposon TraM protein                              | 14.3   | 5.4    | 13.6   | 9.5    | 8.5    | 1.5    | 0.49 | 5.6E-01 |

|                 |                                                                                                                              |        |        |        |        |        |        |      |         |
|-----------------|------------------------------------------------------------------------------------------------------------------------------|--------|--------|--------|--------|--------|--------|------|---------|
| B035DRAFT_03461 | hypothetical protein                                                                                                         | 10.3   | 7.3    | 9.6    | 8.9    | 11.9   | 4.3    | 0.86 | 8.0E-01 |
| B035DRAFT_03462 | Bacteroides conjugative transposon TraK protein                                                                              | 16.6   | 9.9    | 14.5   | 12.8   | 13.1   | 5.4    | 0.72 | 5.9E-01 |
| B035DRAFT_03463 | Bacteroides conjugative transposon TraJ protein                                                                              | 20.4   | 10.8   | 18.4   | 17.3   | 17.6   | 5.7    | 0.75 | 7.1E-01 |
| B035DRAFT_03464 | hypothetical protein                                                                                                         | 0.0    | 0.0    | 0.0    | 0.0    | 0.0    | 0.0    | 0.93 |         |
| B035DRAFT_03465 | ( miscRNA )                                                                                                                  | 22.9   | 12.3   | 21.4   | 22.7   | 25.1   | 8.6    | 0.00 | 9.3E-01 |
| B035DRAFT_03466 | hypothetical protein                                                                                                         | 0.0    | 0.0    | 0.0    | 0.0    | 0.0    | 0.0    | 0.00 |         |
| B035DRAFT_03467 | ( tRNA )                                                                                                                     | 175.7  | 130.9  | 180.9  | 184.9  | 91.9   | 36.8   | 0.53 | 4.7E-01 |
| B035DRAFT_03468 | 3-dehydroquinate synthase( EC:4.2.3.4 )                                                                                      | 134.5  | 133.5  | 117.0  | 106.9  | 115.3  | 130.4  | 0.91 | 5.0E-01 |
| B035DRAFT_03469 | hypothetical protein                                                                                                         | 105.4  | 140.1  | 143.9  | 132.5  | 127.8  | 154.9  | 1.07 | 7.5E-01 |
| B035DRAFT_03470 | hypothetical protein                                                                                                         | 124.8  | 133.8  | 135.1  | 203.3  | 221.0  | 193.7  | 1.57 | 1.5E-02 |
| B035DRAFT_03471 | Phosphatidylserine/phosphatidylglycerophosphate/cardiolipin synthases and related enzymes( EC:2.7.8.)                        | 73.0   | 78.4   | 83.1   | 79.8   | 81.1   | 94.9   | 1.09 | 4.8E-01 |
| B035DRAFT_03472 | N6-adenine-specific methylase                                                                                                | 245.8  | 254.1  | 270.8  | 237.4  | 240.1  | 326.9  | 1.03 | 8.8E-01 |
| B035DRAFT_03473 | hypothetical protein                                                                                                         | 158.6  | 189.9  | 176.7  | 154.6  | 161.9  | 218.9  | 1.01 | 9.7E-01 |
| B035DRAFT_03474 | hypothetical protein                                                                                                         | 1160.3 | 1291.4 | 1117.2 | 1169.5 | 1300.1 | 1663.7 | 1.15 | 5.0E-01 |
| B035DRAFT_03475 | PIF1 helicase.( EC:3.1.11.5 )                                                                                                | 264.3  | 216.2  | 230.5  | 158.9  | 123.1  | 105.3  | 0.54 | 7.4E-02 |
| B035DRAFT_03476 | hypothetical protein                                                                                                         | 67.3   | 60.7   | 69.0   | 73.5   | 71.5   | 86.5   | 1.17 | 2.6E-01 |
| B035DRAFT_03477 | alanine--tRNA ligase( EC:6.1.1.7 )                                                                                           | 285.2  | 282.5  | 260.6  | 240.6  | 269.5  | 273.5  | 0.95 | 5.3E-01 |
| B035DRAFT_03478 | Membrane proteins related to metalloendopeptidases                                                                           | 78.8   | 90.8   | 74.7   | 118.9  | 129.3  | 85.1   | 1.35 | 2.7E-01 |
| B035DRAFT_03479 | Predicted transcriptional regulators                                                                                         | 121.4  | 130.9  | 122.3  | 163.0  | 158.0  | 154.8  | 1.27 | 2.1E-02 |
| B035DRAFT_03480 | (p)ppGpp synthetase, RelA/SpoT family( EC:2.7.6.5 )                                                                          | 133.8  | 145.0  | 138.4  | 157.5  | 168.6  | 188.4  | 1.23 | 1.2E-01 |
| B035DRAFT_03481 | Soluble lytic murein transglycosylase and related regulatory proteins (some contain LysM/invasin domains)( EC:3.2.1.) (GH23) | 119.9  | 137.5  | 125.7  | 150.5  | 142.0  | 164.4  | 1.19 | 1.6E-01 |
| B035DRAFT_03482 | hypothetical protein                                                                                                         | 215.7  | 221.7  | 195.3  | 248.3  | 231.8  | 244.1  | 1.15 | 1.5E-01 |
| B035DRAFT_03483 | ParB-like partition proteins                                                                                                 | 204.1  | 212.8  | 194.3  | 235.7  | 226.9  | 240.0  | 1.15 | 7.7E-02 |
| B035DRAFT_03484 | ATPases involved in chromosome partitioning                                                                                  | 206.5  | 238.0  | 222.4  | 274.4  | 245.6  | 291.9  | 1.22 | 1.6E-01 |
| B035DRAFT_03485 | 5'/3"-nucleotidase SurE( EC:3.1.3.5 )                                                                                        | 228.5  | 223.8  | 208.5  | 324.9  | 327.7  | 284.4  | 1.42 | 3.7E-02 |
| B035DRAFT_03486 | lipid-A-disaccharide synthase( EC:2.4.1.182 ) (GT19)                                                                         | 166.0  | 165.9  | 171.8  | 221.0  | 216.8  | 234.7  | 1.33 | 1.1E-02 |
| B035DRAFT_03487 | CDP-diglyceride synthetase( EC:2.7.7.41 )                                                                                    | 278.3  | 302.0  | 286.1  | 291.7  | 277.3  | 337.2  | 1.04 | 7.2E-01 |
| B035DRAFT_03488 | ATP-dependent metalloprotease FtsH( EC:3.4.24.)                                                                              | 619.1  | 562.9  | 594.7  | 616.5  | 583.7  | 551.0  | 0.99 | 8.6E-01 |
| B035DRAFT_03489 | iojap-like ribosome-associated protein                                                                                       | 315.8  | 360.5  | 334.0  | 302.8  | 249.3  | 345.0  | 0.88 | 4.9E-01 |
| B035DRAFT_03490 | hypothetical protein                                                                                                         | 1.6    | 1.9    | 2.9    | 0.0    | 1.5    | 0.7    | 0.50 | 3.7E-01 |
| B035DRAFT_03491 | ( tRNA )                                                                                                                     | 134.7  | 214.9  | 186.1  | 165.8  | 126.2  | 87.1   | 0.70 | 4.0E-01 |
| B035DRAFT_03492 | hypothetical protein                                                                                                         | 0.0    | 0.0    | 0.0    | 0.0    | 0.0    | 0.0    | 0.00 |         |
| B035DRAFT_03493 | hypothetical protein                                                                                                         | 0.0    | 0.0    | 0.0    | 0.0    | 0.0    | 0.0    | 0.00 |         |
| B035DRAFT_03494 | hypothetical protein                                                                                                         | 125.0  | 143.4  | 138.2  | 74.5   | 77.7   | 98.5   | 0.61 | 6.1E-02 |
| B035DRAFT_03495 | hypothetical protein                                                                                                         | 10.9   | 15.0   | 10.8   | 32.2   | 32.2   | 52.1   | 3.13 | 4.5E-02 |
| B035DRAFT_03496 | Dipeptidyl aminopeptidases/acylaminoacyl-peptidases (CE1)                                                                    | 147.7  | 143.1  | 131.5  | 138.5  | 170.6  | 164.6  | 1.12 | 4.0E-01 |
| B035DRAFT_03497 | Putative homoserine kinase type II (protein kinase fold)                                                                     | 586.2  | 577.5  | 543.2  | 595.1  | 674.4  | 805.0  | 1.21 | 2.9E-01 |
| B035DRAFT_03498 | Phosphate/sulphate permeases                                                                                                 | 7.6    | 6.7    | 8.2    | 4.7    | 4.4    | 6.0    | 0.67 | 1.1E-01 |
| B035DRAFT_03499 | AlcAR transformylase/IMP cyclohydrolase PurH (only IMP cyclohydrolase domain in Aful)( EC:3.5.4.10,EC:2.1.2.3 )              | 543.9  | 546.2  | 513.9  | 523.1  | 563.4  | 513.0  | 1.00 | 9.7E-01 |
| B035DRAFT_03500 | cell shape determining protein, MreB/Mri family                                                                              | 363.9  | 349.7  | 351.2  | 325.9  | 379.9  | 342.3  | 0.98 | 8.5E-01 |
| B035DRAFT_03501 | Cell shape-determining protein                                                                                               | 244.5  | 257.9  | 234.9  | 238.1  | 274.5  | 248.6  | 1.03 | 7.4E-01 |
| B035DRAFT_03502 | rod shape-determining protein MreD                                                                                           | 150.4  | 159.5  | 128.0  | 134.2  | 141.5  | 160.3  | 1.00 | 9.9E-01 |
| B035DRAFT_03503 | penicillin-binding protein 2                                                                                                 | 147.0  | 147.0  | 141.0  | 121.9  | 150.5  | 116.9  | 0.89 | 4.2E-01 |
| B035DRAFT_03504 | Bacterial cell division membrane protein                                                                                     | 88.7   | 96.2   | 92.5   | 90.4   | 102.5  | 94.3   | 1.03 | 6.7E-01 |
| B035DRAFT_03505 | gliding motility-associated lipoprotein GldH                                                                                 | 105.1  | 134.5  | 131.6  | 126.5  | 119.6  | 109.5  | 0.96 | 8.2E-01 |
| B035DRAFT_03506 | Uncharacterized homolog of PSP1                                                                                              | 189.9  | 171.6  | 152.4  | 186.5  | 195.8  | 142.9  | 1.02 | 9.5E-01 |
| B035DRAFT_03507 | DNA polymerase III, delta" subunit( EC:2.7.7.7 )                                                                             | 177.9  | 191.5  | 176.8  | 188.7  | 215.7  | 223.2  | 1.15 | 2.3E-01 |
| B035DRAFT_03508 | 5,10-methylenetetrahydrofolate reductase, prokaryotic form( EC:1.5.1.20 )                                                    | 195.5  | 205.6  | 197.8  | 220.1  | 215.6  | 201.8  | 1.06 | 2.9E-01 |

|                 |                                                                                                                  |       |       |       |       |       |       |      |         |
|-----------------|------------------------------------------------------------------------------------------------------------------|-------|-------|-------|-------|-------|-------|------|---------|
| B035DRAFT_03509 | Phosphatidylserine/phosphatidylglycerophosphate/cardioliipin synthases and related enzymes                       | 52.0  | 56.9  | 53.5  | 59.4  | 48.2  | 61.4  | 1.04 | 8.2E-01 |
| B035DRAFT_03510 | RND family efflux transporter, MFP subunit                                                                       | 47.6  | 39.2  | 44.5  | 54.3  | 59.9  | 40.7  | 1.17 | 5.1E-01 |
| B035DRAFT_03511 | Cation/multidrug efflux pump                                                                                     | 31.6  | 26.3  | 24.9  | 25.2  | 35.8  | 21.1  | 0.97 | 9.3E-01 |
| B035DRAFT_03512 | Outer membrane protein                                                                                           | 41.6  | 45.0  | 36.1  | 38.9  | 46.8  | 53.3  | 1.13 | 5.5E-01 |
| B035DRAFT_03513 | hypothetical protein                                                                                             | 109.4 | 134.6 | 116.4 | 111.8 | 133.9 | 147.7 | 1.09 | 6.5E-01 |
| B035DRAFT_03514 | hypothetical protein                                                                                             | 0.0   | 0.0   | 0.0   | 0.0   | 0.0   | 0.0   | 0.00 |         |
| B035DRAFT_03515 | TonB-linked outer membrane protein, SusC/RagA family                                                             | 33.9  | 31.8  | 33.1  | 23.4  | 23.8  | 26.0  | 0.74 | 2.2E-02 |
| B035DRAFT_03516 | SusD family                                                                                                      | 34.6  | 32.4  | 32.2  | 27.8  | 29.3  | 26.5  | 0.84 | 7.6E-02 |
| B035DRAFT_03517 | hypothetical protein                                                                                             | 8.4   | 9.2   | 10.4  | 3.7   | 3.0   | 4.2   | 0.39 | 2.2E-02 |
| B035DRAFT_03518 | Periplasmic component of the Tol biopolymer transport system                                                     | 11.1  | 9.5   | 11.7  | 6.4   | 6.6   | 6.3   | 0.60 | 2.2E-02 |
| B035DRAFT_03519 | SusD family                                                                                                      | 24.3  | 26.1  | 22.8  | 16.9  | 13.3  | 20.8  | 0.69 | 1.8E-01 |
| B035DRAFT_03520 | Ribosomal protein L11 methylase( EC:2.1.1.1.)                                                                    | 116.4 | 124.6 | 115.2 | 141.5 | 141.2 | 186.9 | 1.31 | 1.8E-01 |
| B035DRAFT_03521 | Glutaredoxin.                                                                                                    | 84.8  | 85.0  | 75.6  | 119.2 | 109.7 | 136.5 | 1.49 | 5.7E-02 |
| B035DRAFT_03522 | Bacterial nucleoid DNA-binding protein                                                                           | 117.8 | 92.2  | 125.2 | 157.3 | 118.8 | 55.4  | 0.91 | 8.9E-01 |
| B035DRAFT_03523 | hypothetical protein                                                                                             | 239.7 | 216.6 | 224.3 | 223.9 | 299.9 | 216.9 | 1.08 | 7.1E-01 |
| B035DRAFT_03524 | hypothetical protein                                                                                             | 183.1 | 175.9 | 168.2 | 170.2 | 236.9 | 221.9 | 1.18 | 3.8E-01 |
| B035DRAFT_03525 | hypothetical protein                                                                                             | 33.1  | 33.4  | 34.4  | 36.5  | 39.7  | 39.1  | 1.14 | 7.1E-02 |
| B035DRAFT_03526 | Predicted dehydrogenases and related proteins (GH109)                                                            | 62.5  | 61.7  | 59.8  | 65.0  | 66.8  | 70.1  | 1.10 | 1.1E-01 |
| B035DRAFT_03527 | Predicted soluble lytic transglycosylase fused to an ABC-type amino acid-binding protein                         | 55.3  | 73.6  | 65.5  | 77.1  | 84.8  | 98.2  | 1.34 | 1.9E-01 |
| B035DRAFT_03528 | hypothetical protein                                                                                             | 104.4 | 118.7 | 104.4 | 125.7 | 119.2 | 141.7 | 1.18 | 2.2E-01 |
| B035DRAFT_03529 | Pyruvate:ferredoxin oxidoreductase and related 2-oxoacid:ferredoxin oxidoreductases, gamma subunit( EC:1.2.7.3 ) | 513.6 | 542.1 | 541.7 | 452.6 | 547.1 | 497.0 | 0.93 | 5.1E-01 |
| B035DRAFT_03530 | Pyruvate:ferredoxin oxidoreductase and related 2-oxoacid:ferredoxin oxidoreductases, beta subunit( EC:1.2.7.3 )  | 416.8 | 431.8 | 378.3 | 328.8 | 385.6 | 330.0 | 0.85 | 2.2E-01 |
| B035DRAFT_03531 | hypothetical protein                                                                                             | 517.8 | 540.0 | 480.8 | 373.6 | 441.2 | 562.9 | 0.88 | 5.8E-01 |
| B035DRAFT_03532 | Pyruvate:ferredoxin oxidoreductase and related 2-oxoacid:ferredoxin oxidoreductases, alpha subunit( EC:1.2.7.3 ) | 562.0 | 567.3 | 530.7 | 470.1 | 523.9 | 442.1 | 0.86 | 1.9E-01 |
| B035DRAFT_03533 | Indolepyruvate ferredoxin oxidoreductase, alpha and beta subunits( EC:1.2.7.3 )                                  | 279.3 | 311.1 | 289.2 | 322.6 | 300.3 | 352.9 | 1.11 | 3.3E-01 |
| B035DRAFT_03534 | Uncharacterized protein conserved in bacteria                                                                    | 445.0 | 470.1 | 390.5 | 467.2 | 459.9 | 458.9 | 1.06 | 5.3E-01 |
| B035DRAFT_03535 | hypothetical protein                                                                                             | 149.8 | 172.0 | 157.8 | 227.0 | 227.8 | 277.8 | 1.52 | 5.5E-02 |
| B035DRAFT_03536 | ribose 5-phosphate isomerase B( EC:5.3.1.6 )                                                                     | 328.9 | 380.1 | 339.8 | 369.1 | 364.0 | 344.5 | 1.03 | 7.5E-01 |
| B035DRAFT_03537 | Transketolase( EC:2.2.1.1 )                                                                                      | 515.3 | 525.8 | 514.2 | 482.3 | 521.9 | 528.4 | 0.98 | 7.8E-01 |
| B035DRAFT_03538 | Thiol-disulfide isomerase and thioredoxins                                                                       | 78.1  | 100.9 | 82.6  | 118.0 | 122.4 | 134.1 | 1.44 | 8.6E-02 |
| B035DRAFT_03539 | hypothetical protein                                                                                             | 0.0   | 0.0   | 0.0   | 0.0   | 0.0   | 0.0   | 0.00 |         |
| B035DRAFT_03540 | hypothetical protein                                                                                             | 16.7  | 14.6  | 14.4  | 9.9   | 13.6  | 12.2  | 0.78 | 2.2E-01 |
| B035DRAFT_03541 | Fe2+-dicitrate sensor, membrane component                                                                        | 15.4  | 12.2  | 9.9   | 6.4   | 14.5  | 9.3   | 0.78 | 6.1E-01 |
| B035DRAFT_03542 | RNA polymerase sigma-70 factor, Bacteroides expansion family 1                                                   | 14.5  | 17.3  | 13.2  | 12.1  | 14.9  | 12.4  | 0.88 | 4.7E-01 |
| B035DRAFT_03543 | hypothetical protein                                                                                             | 12.9  | 15.8  | 14.1  | 12.8  | 20.2  | 17.6  | 1.16 | 5.7E-01 |
| B035DRAFT_03544 | Membrane protease subunits, stomatin/prohibitin homologs                                                         | 7.8   | 11.2  | 9.1   | 14.4  | 32.5  | 29.6  | 2.59 | 1.3E-01 |
| B035DRAFT_03545 | PIF1 helicase./Tetratricopeptide repeat./Helicase.                                                               | 31.7  | 35.1  | 31.0  | 50.7  | 52.8  | 65.9  | 1.72 | 4.3E-02 |
| B035DRAFT_03546 | Sua5/YciO/YrdC/YwIC family protein                                                                               | 42.2  | 56.8  | 42.7  | 53.5  | 48.3  | 69.0  | 1.20 | 4.8E-01 |
| B035DRAFT_03547 | Small-conductance mechanosensitive channel                                                                       | 227.1 | 219.7 | 211.2 | 203.8 | 183.2 | 224.9 | 0.93 | 5.1E-01 |
| B035DRAFT_03548 | Uncharacterized flavoproteins                                                                                    | 244.0 | 255.0 | 222.7 | 182.9 | 273.8 | 214.4 | 0.92 | 7.1E-01 |
| B035DRAFT_03549 | radical SAM protein, TIGR01212 family                                                                            | 139.7 | 135.1 | 105.1 | 88.4  | 124.8 | 73.7  | 0.74 | 3.7E-01 |
| B035DRAFT_03550 | Dipeptidyl aminopeptidases/acylaminoacyl-peptidases( EC:3.4.14.5 ) (CE1)                                         | 78.7  | 82.1  | 76.2  | 68.6  | 78.1  | 84.4  | 0.97 | 8.2E-01 |
| B035DRAFT_03551 | lipoate synthase( EC:2.8.1.8 )                                                                                   | 40.9  | 41.6  | 41.8  | 42.2  | 55.0  | 40.2  | 1.09 | 6.1E-01 |
| B035DRAFT_03552 | hypothetical protein                                                                                             | 128.9 | 166.3 | 171.4 | 169.2 | 118.0 | 156.8 | 0.95 | 8.5E-01 |

|                 |                                                               |       |       |       |        |       |       |      |         |
|-----------------|---------------------------------------------------------------|-------|-------|-------|--------|-------|-------|------|---------|
| B035DRAFT_03553 | Beta-galactosidase/beta-glucuronidase( EC:3.2.1.23 ) (GH2)    | 25.5  | 23.4  | 23.4  | 17.0   | 26.0  | 13.3  | 0.75 | 4.2E-01 |
| B035DRAFT_03554 | hypothetical protein                                          | 3.6   | 3.3   | 6.1   | 3.0    | 1.3   | 0.6   | 0.33 | 2.4E-01 |
| B035DRAFT_03555 | hypothetical protein                                          | 10.1  | 13.1  | 15.1  | 10.7   | 14.3  | 14.3  | 1.03 | 9.2E-01 |
| B035DRAFT_03556 | hypothetical protein                                          | 34.9  | 52.7  | 43.8  | 39.0   | 31.7  | 40.3  | 0.85 | 5.2E-01 |
| B035DRAFT_03557 | hypothetical protein                                          | 36.2  | 32.3  | 27.5  | 30.2   | 36.2  | 34.0  | 1.05 | 7.9E-01 |
| B035DRAFT_03558 | hypothetical protein                                          | 33.4  | 30.8  | 26.7  | 25.6   | 35.4  | 37.5  | 1.07 | 7.8E-01 |
| B035DRAFT_03559 | hypothetical protein                                          | 27.5  | 32.0  | 24.2  | 43.1   | 32.3  | 46.4  | 1.45 | 1.9E-01 |
| B035DRAFT_03560 | Predicted P-loop ATPase and inactivated derivatives           | 98.7  | 89.5  | 111.9 | 98.6   | 98.4  | 46.7  | 0.77 | 5.8E-01 |
| B035DRAFT_03561 | Glycosyltransferase (GT4)                                     | 28.0  | 34.1  | 33.6  | 19.2   | 22.1  | 30.6  | 0.74 | 3.0E-01 |
| B035DRAFT_03562 | Ribosomal protein L11 methylase                               | 34.1  | 30.5  | 36.9  | 22.9   | 23.3  | 29.7  | 0.75 | 1.7E-01 |
| B035DRAFT_03563 | Molybdenum cofactor biosynthesis enzyme                       | 37.3  | 31.5  | 35.8  | 24.6   | 24.6  | 31.5  | 0.77 | 1.9E-01 |
| B035DRAFT_03564 | Protein of unknown function (DUF512)./Radical SAM superfamily | 35.9  | 37.7  | 33.7  | 25.8   | 21.3  | 33.0  | 0.74 | 2.4E-01 |
| B035DRAFT_03565 | hypothetical protein                                          | 39.8  | 38.0  | 35.7  | 29.6   | 23.9  | 31.8  | 0.75 | 1.5E-01 |
| B035DRAFT_03566 | hypothetical protein                                          | 18.2  | 19.3  | 18.8  | 12.7   | 19.2  | 20.3  | 0.91 | 7.3E-01 |
| B035DRAFT_03567 | Nucleoside-diphosphate-sugar epimerases( EC:4.2.1.46 )        | 9.7   | 13.3  | 13.9  | 9.7    | 11.3  | 12.0  | 0.90 | 6.6E-01 |
| B035DRAFT_03568 | Fe-S oxidoreductase                                           | 11.9  | 11.0  | 10.9  | 9.4    | 10.6  | 17.7  | 1.07 | 8.6E-01 |
| B035DRAFT_03569 | nucleotide sugar dehydrogenase( EC:1.1.1.1.)                  | 9.0   | 7.9   | 9.2   | 9.4    | 12.1  | 13.7  | 1.34 | 2.3E-01 |
| B035DRAFT_03570 | Predicted transcriptional regulators                          | 3.7   | 7.8   | 9.9   | 5.5    | 10.7  | 13.5  | 1.41 | 6.4E-01 |
| B035DRAFT_03571 | Membrane proteins related to metalloendopeptidases            | 9.5   | 7.0   | 9.4   | 3.9    | 2.9   | 5.4   | 0.47 | 1.1E-01 |
| B035DRAFT_03572 | hypothetical protein                                          | 2.5   | 2.9   | 3.0   | 2.6    | 2.4   | 2.2   | 0.87 | 3.3E-01 |
| B035DRAFT_03573 | hypothetical protein                                          | 3.2   | 3.7   | 5.9   | 3.4    | 2.9   | 0.7   | 0.47 | 4.2E-01 |
| B035DRAFT_03574 | hypothetical protein                                          | 3.4   | 2.2   | 2.3   | 2.1    | 2.1   | 2.1   | 0.81 | 4.2E-01 |
| B035DRAFT_03575 | hypothetical protein                                          | 2.9   | 2.8   | 1.3   | 2.4    | 2.2   | 1.9   | 0.99 | 9.9E-01 |
| B035DRAFT_03576 | Predicted membrane protein                                    | 3.1   | 0.8   | 1.7   | 2.5    | 1.9   | 1.2   | 1.13 | 8.9E-01 |
| B035DRAFT_03577 | hypothetical protein                                          | 2.2   | 1.6   | 2.2   | 2.1    | 0.6   | 0.6   | 0.47 | 3.5E-01 |
| B035DRAFT_03578 | hypothetical protein                                          | 1.4   | 2.2   | 2.3   | 1.0    | 1.7   | 0.9   | 0.59 | 2.9E-01 |
| B035DRAFT_03579 | hypothetical protein                                          | 1.7   | 1.2   | 0.6   | 0.3    | 1.4   | 1.1   | 0.69 | 7.4E-01 |
| B035DRAFT_03580 | Membrane proteins related to metalloendopeptidases            | 2.4   | 1.7   | 1.0   | 1.5    | 2.2   | 1.7   | 1.11 | 8.5E-01 |
| B035DRAFT_03581 | hypothetical protein                                          | 2.1   | 1.7   | 2.6   | 0.8    | 0.0   | 0.6   | 0.33 | 5.2E-02 |
| B035DRAFT_03582 | hypothetical protein                                          | 2.8   | 2.3   | 2.4   | 2.9    | 3.0   | 3.0   | 1.20 | 1.7E-01 |
| B035DRAFT_03583 | Mismatch repair ATPase (MutS family)                          | 3.3   | 3.9   | 3.0   | 4.7    | 4.3   | 4.3   | 1.31 | 1.2E-01 |
| B035DRAFT_03584 | Muramidase (flagellum-specific) (GH73)                        | 86.1  | 102.8 | 102.7 | 131.0  | 115.4 | 149.9 | 1.36 | 1.5E-01 |
| B035DRAFT_03585 | hypothetical protein                                          | 291.8 | 288.0 | 262.9 | 277.0  | 297.0 | 246.6 | 0.97 | 8.1E-01 |
| B035DRAFT_03586 | hypothetical protein                                          | 16.4  | 20.1  | 20.0  | 16.1   | 18.8  | 16.2  | 0.91 | 5.2E-01 |
| B035DRAFT_03587 | hypothetical protein                                          | 541.1 | 900.4 | 837.3 | 1367.7 | 882.7 | 745.1 | 1.30 | 5.4E-01 |
| B035DRAFT_03588 | hypothetical protein                                          | 167.9 | 229.7 | 162.9 | 329.9  | 305.3 | 353.4 | 1.78 | 6.6E-02 |
| B035DRAFT_03589 | radical SAM additional 4Fe4S-binding domain                   | 30.6  | 37.7  | 35.2  | 31.8   | 33.7  | 49.1  | 1.09 | 7.6E-01 |
| B035DRAFT_03590 | Transposase and inactivated derivatives                       | 139.0 | 115.9 | 137.2 | 147.7  | 143.8 | 132.8 | 1.09 | 5.0E-01 |
| B035DRAFT_03591 | DNA replication protein                                       | 65.7  | 53.0  | 53.9  | 66.0   | 66.8  | 63.8  | 1.14 | 3.2E-01 |
| B035DRAFT_03592 | DNA binding domain, excisionase family                        | 45.7  | 35.4  | 52.8  | 56.1   | 46.9  | 32.5  | 1.00 | 1.0E+00 |
| B035DRAFT_03593 | hypothetical protein                                          | 62.4  | 34.4  | 50.7  | 64.9   | 51.0  | 18.1  | 0.82 | 8.1E-01 |
| B035DRAFT_03594 | hypothetical protein                                          | 40.3  | 35.0  | 41.8  | 51.7   | 48.1  | 19.0  | 0.93 | 9.1E-01 |
| B035DRAFT_03595 | hypothetical protein                                          | 34.7  | 19.3  | 39.4  | 39.4   | 34.6  | 7.7   | 0.74 | 7.7E-01 |
| B035DRAFT_03596 | hypothetical protein                                          | 45.1  | 22.5  | 42.3  | 50.2   | 33.2  | 8.8   | 0.70 | 7.4E-01 |
| B035DRAFT_03597 | hypothetical protein                                          | 30.2  | 15.7  | 25.3  | 31.1   | 23.7  | 10.0  | 0.85 | 8.3E-01 |
| B035DRAFT_03598 | hypothetical protein                                          | 22.0  | 26.5  | 14.1  | 13.0   | 11.2  | 13.1  | 0.62 | 2.2E-01 |
| B035DRAFT_03599 | Non-ribosomal peptide synthetase modules and related proteins | 161.6 | 153.8 | 113.0 | 33.6   | 60.6  | 53.1  | 0.34 | 6.1E-02 |
| B035DRAFT_03600 | hypothetical protein                                          | 108.9 | 127.3 | 111.0 | 32.2   | 34.2  | 34.0  | 0.29 | 7.5E-04 |
| B035DRAFT_03601 | Outer membrane cobalamin receptor protein                     | 110.0 | 125.1 | 92.7  | 20.8   | 29.5  | 34.4  | 0.25 | 2.3E-02 |
| B035DRAFT_03602 | hypothetical protein                                          | 417.6 | 475.5 | 327.9 | 64.5   | 77.7  | 108.7 | 0.20 | 2.1E-02 |
| B035DRAFT_03603 | Transposase DDE domain.                                       | 208.0 | 227.9 | 251.6 | 140.2  | 128.0 | 154.4 | 0.61 | 4.0E-02 |

|                 |                                                                                 |        |        |       |        |        |        |      |         |
|-----------------|---------------------------------------------------------------------------------|--------|--------|-------|--------|--------|--------|------|---------|
| B035DRAFT_03604 | hypothetical protein                                                            | 168.1  | 172.9  | 190.2 | 99.8   | 119.4  | 152.6  | 0.69 | 1.7E-01 |
| B035DRAFT_03605 | hypothetical protein                                                            | 200.2  | 210.9  | 218.2 | 142.7  | 141.8  | 195.2  | 0.75 | 2.0E-01 |
| B035DRAFT_03606 | Predicted DNA-binding protein with PD1-like DNA-binding motif                   | 223.1  | 205.9  | 217.7 | 173.4  | 177.8  | 177.7  | 0.82 | 2.3E-02 |
| B035DRAFT_03607 | Predicted oxidoreductases (related to aryl-alcohol dehydrogenases)              | 330.6  | 255.8  | 318.9 | 267.7  | 244.9  | 148.3  | 0.71 | 3.6E-01 |
| B035DRAFT_03608 | hypothetical protein                                                            | 218.5  | 197.3  | 241.1 | 188.2  | 175.1  | 137.4  | 0.76 | 2.2E-01 |
| B035DRAFT_03609 | Flavodoxins                                                                     | 136.7  | 125.8  | 127.9 | 102.1  | 99.0   | 106.9  | 0.79 | 3.1E-02 |
| B035DRAFT_03610 | hypothetical protein                                                            | 61.9   | 57.2   | 69.0  | 46.8   | 36.7   | 48.3   | 0.70 | 1.2E-01 |
| B035DRAFT_03611 | hypothetical protein                                                            | 57.7   | 43.1   | 68.2  | 21.7   | 18.7   | 30.0   | 0.42 | 7.6E-02 |
| B035DRAFT_03612 | Ferritin-like protein                                                           | 220.9  | 233.9  | 213.7 | 219.3  | 234.5  | 290.9  | 1.11 | 5.3E-01 |
| B035DRAFT_03613 | membrane protein, MarC family                                                   | 161.4  | 167.9  | 181.4 | 149.3  | 189.3  | 223.9  | 1.09 | 7.1E-01 |
| B035DRAFT_03614 | Ferritin-like protein( EC:1.16.3.1 )                                            | 326.0  | 287.8  | 261.7 | 279.8  | 433.7  | 350.3  | 1.20 | 4.7E-01 |
| B035DRAFT_03615 | DhnA-type fructose-1,6-bisphosphate aldolase and related enzymes( EC:4.1.2.13 ) | 659.3  | 587.0  | 623.5 | 688.0  | 895.0  | 594.8  | 1.15 | 5.3E-01 |
| B035DRAFT_03616 | phosphoglycerate mutase, BPG-dependent, family 1( EC:5.4.2.1 )                  | 516.5  | 501.1  | 477.4 | 524.2  | 749.5  | 528.9  | 1.19 | 4.3E-01 |
| B035DRAFT_03617 | Molecular chaperone (small heat shock protein)                                  | 487.9  | 449.5  | 383.8 | 468.4  | 748.1  | 702.5  | 1.43 | 2.6E-01 |
| B035DRAFT_03618 | RNA polymerase sigma factor, sigma-70 family                                    | 162.6  | 156.7  | 139.7 | 144.3  | 222.0  | 225.9  | 1.27 | 4.0E-01 |
| B035DRAFT_03619 | 6-phosphofructokinase( EC:2.7.1.11 )                                            | 171.7  | 146.1  | 176.9 | 169.0  | 207.3  | 100.2  | 0.92 | 8.6E-01 |
| B035DRAFT_03620 | Kef-type K+ transport systems, membrane components                              | 212.7  | 197.7  | 203.9 | 223.4  | 293.0  | 266.3  | 1.27 | 1.7E-01 |
| B035DRAFT_03621 | alpha-glucan phosphorylases( EC:2.4.1.1 ) (GT35)                                | 198.2  | 185.9  | 188.0 | 232.4  | 252.0  | 172.2  | 1.13 | 5.6E-01 |
| B035DRAFT_03622 | Arginase/agmatinase/formimionoglutamate hydrolase, arginase family              | 136.4  | 134.9  | 107.3 | 119.7  | 162.4  | 153.1  | 1.15 | 5.3E-01 |
| B035DRAFT_03623 | Methylglyoxal synthase( EC:4.2.3.3 )                                            | 246.6  | 225.6  | 213.6 | 229.8  | 302.0  | 378.5  | 1.30 | 3.5E-01 |
| B035DRAFT_03624 | hypothetical protein                                                            | 29.6   | 43.6   | 36.1  | 28.1   | 29.6   | 31.4   | 0.82 | 3.7E-01 |
| B035DRAFT_03625 | hypothetical protein                                                            | 22.2   | 29.8   | 22.8  | 14.4   | 17.0   | 20.2   | 0.69 | 1.9E-01 |
| B035DRAFT_03626 | hypothetical protein                                                            | 150.4  | 132.4  | 171.7 | 116.5  | 84.1   | 115.0  | 0.69 | 1.8E-01 |
| B035DRAFT_03627 | hypothetical protein                                                            | 96.3   | 96.3   | 104.3 | 78.4   | 65.9   | 84.5   | 0.77 | 1.3E-01 |
| B035DRAFT_03628 | hypothetical protein                                                            | 40.6   | 35.9   | 42.2  | 42.7   | 31.4   | 20.7   | 0.77 | 5.0E-01 |
| B035DRAFT_03629 | tRNA (5-methylaminomethyl-2-thiouridylate)-methyltransferase( EC:2.8.1.)        | 306.9  | 266.5  | 253.3 | 196.2  | 172.6  | 134.2  | 0.60 | 9.4E-02 |
| B035DRAFT_03630 | cysteine synthase A( EC:2.5.1.47 )                                              | 402.6  | 297.4  | 311.1 | 315.8  | 220.3  | 125.9  | 0.62 | 3.6E-01 |
| B035DRAFT_03631 | Exonuclease III                                                                 | 65.4   | 67.2   | 62.0  | 48.9   | 75.9   | 36.5   | 0.79 | 5.5E-01 |
| B035DRAFT_03632 | FOG: WD40-like repeat                                                           | 124.5  | 119.9  | 123.9 | 88.0   | 108.1  | 98.2   | 0.80 | 1.1E-01 |
| B035DRAFT_03633 | Superfamily II DNA and RNA helicases( EC:3.6.4.13 )                             | 1034.0 | 1018.8 | 986.6 | 1209.4 | 1211.5 | 1197.1 | 1.19 | 7.4E-03 |
| B035DRAFT_03634 | hypothetical protein                                                            | 505.7  | 502.2  | 480.7 | 506.7  | 512.1  | 557.6  | 1.06 | 3.7E-01 |
| B035DRAFT_03635 | NADH:ubiquinone oxidoreductase 24 kD subunit( EC:1.6.5.3 )                      | 23.7   | 25.5   | 24.1  | 22.7   | 24.4   | 23.8   | 0.97 | 5.4E-01 |
| B035DRAFT_03636 | [FeFe] hydrogenase, group A( EC:1.6.5.3 )                                       | 16.8   | 16.7   | 17.6  | 14.2   | 15.3   | 14.8   | 0.87 | 5.4E-02 |
| B035DRAFT_03637 | NADH:ubiquinone oxidoreductase, NADH-binding (51 kD) subunit( EC:1.6.5.3 )      | 23.0   | 23.9   | 21.1  | 18.5   | 20.1   | 22.7   | 0.90 | 4.1E-01 |
| B035DRAFT_03638 | Beta-galactosidase/beta-glucuronidase( EC:3.2.1.23 ) (GH2)                      | 28.1   | 26.3   | 24.2  | 37.5   | 41.3   | 43.6   | 1.56 | 3.0E-02 |
| B035DRAFT_03639 | TonB-linked outer membrane protein, SusC/RagA family                            | 17.2   | 16.2   | 17.5  | 6.1    | 6.1    | 8.2    | 0.40 | 1.7E-02 |
| B035DRAFT_03640 | hypothetical protein                                                            | 19.5   | 20.7   | 19.1  | 4.9    | 6.9    | 8.5    | 0.33 | 3.3E-02 |
| B035DRAFT_03641 | hypothetical protein                                                            | 0.0    | 0.0    | 0.0   | 0.0    | 0.0    | 0.0    | 0.00 |         |
| B035DRAFT_03642 | hypothetical protein                                                            | 0.0    | 0.0    | 0.0   | 0.0    | 0.0    | 0.0    | 0.00 |         |
| B035DRAFT_03643 | Protein of unknown function (DUF3244).                                          | 86.8   | 105.2  | 114.6 | 59.8   | 56.3   | 67.4   | 0.60 | 6.0E-02 |
| B035DRAFT_03644 | Tfp pilus assembly protein PilF                                                 | 29.6   | 33.8   | 30.4  | 17.8   | 21.6   | 21.2   | 0.65 | 4.5E-02 |
| B035DRAFT_03645 | Cation/multidrug efflux pump                                                    | 74.4   | 74.5   | 69.6  | 41.3   | 56.2   | 49.5   | 0.67 | 8.2E-02 |
| B035DRAFT_03646 | Outer membrane protein                                                          | 76.7   | 80.3   | 72.6  | 53.8   | 63.8   | 61.2   | 0.78 | 8.4E-02 |
| B035DRAFT_03647 | Cation/multidrug efflux pump                                                    | 89.6   | 89.0   | 89.9  | 63.9   | 78.2   | 81.5   | 0.83 | 2.2E-01 |
| B035DRAFT_03648 | RND family efflux transporter, MFP subunit                                      | 117.3  | 101.1  | 95.9  | 102.3  | 124.5  | 73.9   | 0.94 | 8.5E-01 |
| B035DRAFT_03649 | Lipid A core - O-antigen ligase and related enzymes                             | 28.6   | 22.4   | 34.3  | 32.7   | 24.6   | 9.0    | 0.69 | 6.2E-01 |
| B035DRAFT_03650 | signal peptidase I, bacterial type( EC:3.4.21.89 )                              | 26.0   | 24.9   | 19.7  | 22.5   | 20.1   | 12.8   | 0.77 | 4.5E-01 |
| B035DRAFT_03651 | F5/8 type C domain (CBM62)                                                      | 33.8   | 27.5   | 32.0  | 25.3   | 29.6   | 31.6   | 0.93 | 6.4E-01 |
| B035DRAFT_03652 | hypothetical protein                                                            | 14.6   | 15.7   | 14.7  | 13.9   | 19.6   | 21.9   | 1.21 | 4.6E-01 |

|                 |                                                                                                   |       |       |       |       |       |       |  |      |         |
|-----------------|---------------------------------------------------------------------------------------------------|-------|-------|-------|-------|-------|-------|--|------|---------|
| B035DRAFT_03653 | hypothetical protein                                                                              | 24.1  | 26.2  | 25.1  | 21.7  | 27.4  | 33.9  |  | 1.08 | 7.4E-01 |
| B035DRAFT_03654 | hypothetical protein                                                                              | 257.9 | 337.0 | 295.2 | 424.4 | 429.1 | 542.7 |  | 1.57 | 9.3E-02 |
| B035DRAFT_03655 | Molybdenum cofactor biosynthesis enzyme                                                           | 15.2  | 16.5  | 12.2  | 8.8   | 9.8   | 10.0  |  | 0.66 | 8.5E-02 |
| B035DRAFT_03656 | Protein of unknown function (DUF1573).                                                            | 9.4   | 10.4  | 14.0  | 7.2   | 5.4   | 14.3  |  | 0.74 | 6.0E-01 |
| B035DRAFT_03657 | Protein of unknown function (DUF1573).                                                            | 43.7  | 57.8  | 51.8  | 61.0  | 52.1  | 51.7  |  | 1.08 | 6.7E-01 |
| B035DRAFT_03658 | hypothetical protein                                                                              | 0.0   | 0.0   | 0.0   | 0.0   | 0.0   | 0.0   |  | 0.00 |         |
| B035DRAFT_03659 | Beta-lactamase class A( EC:3.5.2.6 )                                                              | 176.3 | 184.8 | 183.4 | 151.5 | 150.1 | 195.3 |  | 0.91 | 5.3E-01 |
| B035DRAFT_03660 | hypothetical protein                                                                              | 18.2  | 24.6  | 22.8  | 18.4  | 19.1  | 22.1  |  | 0.91 | 6.4E-01 |
| B035DRAFT_03661 | hypothetical protein                                                                              | 8.2   | 4.9   | 9.8   | 9.9   | 12.3  | 9.4   |  | 1.43 | 3.9E-01 |
| B035DRAFT_03662 | RecA-superfamily ATPases implicated in signal transduction                                        | 8.5   | 6.6   | 9.5   | 10.7  | 10.0  | 10.6  |  | 1.29 | 2.5E-01 |
| B035DRAFT_03663 | DNA binding domain, excisionase family                                                            | 7.2   | 8.4   | 9.9   | 19.0  | 9.8   | 6.1   |  | 1.24 | 7.3E-01 |
| B035DRAFT_03664 | hypothetical protein                                                                              | 10.6  | 12.6  | 10.8  | 12.9  | 9.8   | 12.9  |  | 1.04 | 8.5E-01 |
| B035DRAFT_03665 | Site-specific recombinase XerD                                                                    | 13.7  | 10.7  | 12.1  | 12.7  | 16.0  | 14.1  |  | 1.17 | 3.8E-01 |
| B035DRAFT_03666 | hypothetical protein                                                                              | 5.6   | 4.6   | 7.5   | 3.6   | 7.7   | 5.9   |  | 0.95 | 9.2E-01 |
| B035DRAFT_03667 | quasi-rSAM protein, GG-Bacteroidales system                                                       | 4.0   | 5.5   | 5.0   | 2.8   | 3.2   | 5.1   |  | 0.75 | 4.3E-01 |
| B035DRAFT_03668 | ABC-type bacteriocin/lantibiotic exporters, contain an N-terminal double-glycine peptidase domain | 4.0   | 3.0   | 4.4   | 2.9   | 3.1   | 1.4   |  | 0.62 | 3.6E-01 |
| B035DRAFT_03669 | hypothetical protein                                                                              | 1.4   | 2.2   | 2.5   | 0.5   | 1.4   | 0.3   |  | 0.32 | 2.3E-01 |
| B035DRAFT_03670 | hypothetical protein                                                                              | 1.2   | 1.0   | 0.7   | 1.9   | 1.6   | 0.3   |  | 0.97 | 9.8E-01 |
| B035DRAFT_03671 | Predicted glycosyltransferase involved in capsule biosynthesis (GT7)                              | 4.2   | 2.7   | 3.3   | 2.4   | 2.5   | 1.9   |  | 0.67 | 2.1E-01 |
| B035DRAFT_03672 | Glycosyltransferase (GT4)                                                                         | 31.6  | 23.1  | 28.0  | 17.4  | 16.8  | 14.9  |  | 0.60 | 6.4E-02 |
| B035DRAFT_03673 | hypothetical protein                                                                              | 123.5 | 112.8 | 111.6 | 88.3  | 78.1  | 71.3  |  | 0.68 | 5.3E-02 |
| B035DRAFT_03674 | hypothetical protein                                                                              | 0.0   | 0.0   | 0.0   | 0.0   | 0.0   | 0.0   |  | 0.00 |         |
| B035DRAFT_03675 | hypothetical protein                                                                              | 51.6  | 40.4  | 58.2  | 38.5  | 55.3  | 72.5  |  | 1.08 | 8.5E-01 |
| B035DRAFT_03676 | Dimethyladenosine transferase (rRNA methylation)                                                  | 38.8  | 48.1  | 42.2  | 43.6  | 39.9  | 43.0  |  | 0.98 | 9.0E-01 |
| B035DRAFT_03677 | Beta-lactamase class D( EC:3.5.2.6 )                                                              | 16.1  | 16.9  | 15.6  | 12.2  | 13.0  | 17.9  |  | 0.87 | 5.4E-01 |
| B035DRAFT_03678 | Streptomycin adenylyltransferase.( EC:2.7.7.)                                                     | 36.8  | 38.4  | 39.5  | 49.4  | 44.3  | 66.3  |  | 1.38 | 2.0E-01 |
| B035DRAFT_03679 | Site-specific recombinase XerD                                                                    | 170.7 | 155.1 | 163.2 | 257.8 | 206.6 | 130.3 |  | 1.17 | 6.7E-01 |
| B035DRAFT_03680 | Sugar phosphate isomerases/epimerases                                                             | 172.9 | 141.0 | 127.7 | 181.0 | 152.8 | 135.1 |  | 1.06 | 8.0E-01 |
| B035DRAFT_03681 | Histidine kinase-, DNA gyrase B-, and HSP90-like ATPase.                                          | 57.5  | 55.1  | 63.2  | 66.4  | 64.3  | 39.0  |  | 0.94 | 8.6E-01 |
| B035DRAFT_03682 | Nucleotidyltransferase/DNA polymerase involved in DNA repair                                      | 38.9  | 33.9  | 45.2  | 57.6  | 46.8  | 31.0  |  | 1.12 | 7.6E-01 |
| B035DRAFT_03683 | SOS-response transcriptional repressors (RecA-mediated autopeptidases)( EC:3.4.21.)               | 48.2  | 36.2  | 48.4  | 41.9  | 43.4  | 21.5  |  | 0.77 | 5.7E-01 |
| B035DRAFT_03684 | Uncharacterized protein conserved in bacteria                                                     | 16.9  | 19.2  | 23.0  | 24.8  | 22.0  | 9.2   |  | 0.88 | 8.4E-01 |
| B035DRAFT_03685 | hypothetical protein                                                                              | 3.9   | 3.8   | 5.4   | 4.7   | 7.8   | 2.7   |  | 1.08 | 9.1E-01 |
| B035DRAFT_03686 | hypothetical protein                                                                              | 4.6   | 1.5   | 4.0   | 7.7   | 6.0   | 2.4   |  | 1.57 | 6.2E-01 |
| B035DRAFT_03687 | hypothetical protein                                                                              | 4.0   | 4.2   | 9.2   | 5.6   | 6.9   | 2.4   |  | 0.85 | 8.4E-01 |
| B035DRAFT_03688 | hypothetical protein                                                                              | 1.9   | 1.1   | 1.7   | 0.0   | 2.5   | 2.1   |  | 1.54 | 2.9E-01 |
| B035DRAFT_03689 | hypothetical protein                                                                              | 2.1   | 1.2   | 0.0   | 3.4   | 1.5   | 1.9   |  | 1.30 | 7.1E-01 |
| B035DRAFT_03690 | hypothetical protein                                                                              | 2.0   | 0.8   | 0.8   | 0.0   | 3.7   | 0.0   |  | 3.36 |         |
| B035DRAFT_03691 | Predicted transcriptional regulators                                                              | 68.1  | 46.9  | 62.4  | 89.4  | 92.9  | 96.2  |  | 1.59 | 9.3E-02 |
| B035DRAFT_03692 | Type I restriction-modification system methyltransferase subunit( EC:2.1.1.72 )                   | 136.3 | 139.2 | 147.3 | 151.6 | 154.9 | 165.4 |  | 1.12 | 1.5E-01 |
| B035DRAFT_03693 | Site-specific recombinase XerD                                                                    | 137.8 | 145.5 | 130.2 | 123.7 | 134.2 | 171.5 |  | 1.03 | 8.9E-01 |
| B035DRAFT_03694 | Restriction endonuclease S subunits                                                               | 106.6 | 113.7 | 99.9  | 95.4  | 94.4  | 140.7 |  | 1.02 | 9.6E-01 |
| B035DRAFT_03695 | Protein involved in cell division                                                                 | 80.7  | 91.8  | 86.6  | 75.8  | 80.9  | 108.7 |  | 1.01 | 9.6E-01 |
| B035DRAFT_03696 | Type I restriction modification DNA specificity domain.                                           | 36.3  | 48.6  | 55.3  | 38.2  | 51.0  | 42.9  |  | 0.95 | 8.6E-01 |
| B035DRAFT_03697 | hypothetical protein                                                                              | 0.0   | 0.0   | 0.0   | 0.0   | 0.0   | 0.0   |  | 0.00 |         |
| B035DRAFT_03698 | SusD family                                                                                       | 32.9  | 33.1  | 36.7  | 25.4  | 24.8  | 32.8  |  | 0.80 | 2.5E-01 |
| B035DRAFT_03699 | Domain of unknown function (DUF303) (CE6)                                                         | 52.0  | 62.3  | 60.0  | 54.8  | 56.0  | 76.1  |  | 1.06 | 7.9E-01 |
| B035DRAFT_03700 | Arylsulfatase A and related enzymes                                                               | 103.0 | 97.8  | 106.3 | 108.3 | 108.2 | 119.9 |  | 1.09 | 2.7E-01 |

|                 |                                                                                 |       |       |       |       |       |       |  |      |         |
|-----------------|---------------------------------------------------------------------------------|-------|-------|-------|-------|-------|-------|--|------|---------|
| B035DRAFT_03701 | Alpha-L-fucosidase (GH29)                                                       | 173.8 | 207.4 | 199.2 | 252.6 | 234.8 | 217.0 |  | 1.21 | 1.8E-01 |
| B035DRAFT_03702 | hypothetical protein                                                            | 10.0  | 9.8   | 10.0  | 9.9   | 10.0  | 6.6   |  | 0.87 | 5.8E-01 |
| B035DRAFT_03703 | hypothetical protein                                                            | 9.6   | 6.0   | 6.3   | 5.4   | 8.4   | 5.9   |  | 0.91 | 8.0E-01 |
| B035DRAFT_03704 | hypothetical protein                                                            | 4.6   | 1.8   | 3.2   | 1.6   | 3.1   | 4.1   |  | 0.92 | 9.2E-01 |
| B035DRAFT_03705 | hypothetical protein                                                            | 3.2   | 2.1   | 2.4   | 2.9   | 2.9   | 1.1   |  | 0.83 | 7.8E-01 |
| B035DRAFT_03706 | hypothetical protein                                                            | 3.4   | 2.7   | 3.4   | 2.3   | 2.3   | 1.4   |  | 0.62 | 2.0E-01 |
| B035DRAFT_03707 | hypothetical protein                                                            | 1.3   | 2.3   | 4.0   | 1.7   | 3.6   | 1.8   |  | 0.97 | 9.8E-01 |
| B035DRAFT_03708 | hypothetical protein                                                            | 2.9   | 1.7   | 3.1   | 2.7   | 1.0   | 2.0   |  | 0.70 | 5.8E-01 |
| B035DRAFT_03709 | hypothetical protein                                                            | 2.1   | 4.0   | 2.5   | 1.4   | 1.9   | 1.9   |  | 0.63 | 2.6E-01 |
| B035DRAFT_03710 | hypothetical protein                                                            | 2.2   | 2.5   | 3.7   | 2.0   | 4.0   | 2.7   |  | 1.02 | 9.7E-01 |
| B035DRAFT_03711 | hypothetical protein                                                            | 2.7   | 4.0   | 3.2   | 2.4   | 4.8   | 2.8   |  | 0.98 | 9.7E-01 |
| B035DRAFT_03712 | hypothetical protein                                                            | 16.6  | 9.9   | 17.4  | 14.2  | 13.4  | 6.6   |  | 0.76 | 6.2E-01 |
| B035DRAFT_03713 | hypothetical protein                                                            | 23.3  | 16.0  | 15.1  | 12.9  | 20.2  | 7.9   |  | 0.72 | 5.4E-01 |
| B035DRAFT_03714 | DNA primase (bacterial type)                                                    | 29.2  | 18.6  | 30.1  | 21.0  | 22.2  | 7.0   |  | 0.58 | 4.6E-01 |
| B035DRAFT_03715 | Conjugative transposon protein TraO.                                            | 22.3  | 11.8  | 15.0  | 18.7  | 18.9  | 3.7   |  | 0.69 | 7.3E-01 |
| B035DRAFT_03716 | Bacteroides conjugative transposon TraN protein                                 | 32.4  | 19.6  | 27.0  | 23.9  | 26.7  | 8.9   |  | 0.69 | 5.9E-01 |
| B035DRAFT_03717 | Bacteroides conjugative transposon TraM protein                                 | 14.3  | 5.4   | 13.6  | 9.5   | 8.5   | 1.5   |  | 0.49 | 5.6E-01 |
| B035DRAFT_03718 | hypothetical protein                                                            | 10.3  | 7.3   | 9.6   | 8.9   | 11.9  | 4.3   |  | 0.86 | 8.0E-01 |
| B035DRAFT_03719 | Bacteroides conjugative transposon TraK protein                                 | 16.6  | 9.9   | 14.5  | 12.8  | 13.1  | 5.4   |  | 0.72 | 5.9E-01 |
| B035DRAFT_03720 | Bacteroides conjugative transposon TraJ protein                                 | 20.4  | 10.8  | 18.4  | 17.3  | 17.6  | 5.7   |  | 0.75 | 7.1E-01 |
| B035DRAFT_03721 | hypothetical protein                                                            | 0.0   | 0.0   | 0.0   | 0.0   | 0.0   | 0.0   |  | 0.93 |         |
| B035DRAFT_03722 | ( miscRNA )                                                                     | 22.9  | 12.3  | 21.4  | 22.7  | 25.1  | 8.6   |  | 0.00 | 9.3E-01 |
| B035DRAFT_03723 | Acetyl-CoA carboxylase, carboxyltransferase component (subunits alpha and beta) | 178.1 | 157.6 | 169.2 | 108.6 | 166.2 | 109.0 |  | 0.75 | 3.0E-01 |
| B035DRAFT_03724 | Acetyl/propionyl-CoA carboxylase, alpha subunit                                 | 163.4 | 127.1 | 139.0 | 92.4  | 124.9 | 71.1  |  | 0.66 | 2.4E-01 |
| B035DRAFT_03725 | acetyl-CoA carboxylase, biotin carboxylase subunit( EC:6.3.4.14,EC:6.4.1.2 )    | 220.3 | 204.2 | 215.8 | 159.5 | 187.6 | 134.7 |  | 0.75 | 1.6E-01 |
| B035DRAFT_03726 | Uncharacterized conserved protein                                               | 200.6 | 232.5 | 181.9 | 163.5 | 136.1 | 154.7 |  | 0.74 | 1.4E-01 |
| B035DRAFT_03727 | Sortase and related acyltransferases( EC:2.3.1.183 )                            | 67.5  | 69.1  | 58.3  | 95.7  | 102.4 | 88.0  |  | 1.47 | 5.1E-02 |
| B035DRAFT_03728 | Fe-S oxidoreductase                                                             | 68.8  | 78.3  | 77.7  | 87.9  | 87.7  | 82.0  |  | 1.15 | 1.7E-01 |
| B035DRAFT_03729 | Acetyltransferases                                                              | 30.7  | 32.5  | 20.1  | 32.3  | 35.7  | 30.4  |  | 1.20 | 5.1E-01 |
| B035DRAFT_03730 | hypothetical protein                                                            | 29.7  | 34.9  | 27.7  | 33.5  | 30.1  | 27.3  |  | 0.98 | 9.3E-01 |
| B035DRAFT_03731 | Outer membrane receptor proteins, mostly Fe transport                           | 32.9  | 34.5  | 32.6  | 29.1  | 34.4  | 25.4  |  | 0.88 | 4.4E-01 |
| B035DRAFT_03732 | Gram-negative bacterial tonB protein.                                           | 21.1  | 25.7  | 20.7  | 18.7  | 20.6  | 24.6  |  | 0.95 | 7.8E-01 |
| B035DRAFT_03733 | hypothetical protein                                                            | 27.8  | 34.8  | 29.2  | 21.1  | 22.7  | 27.1  |  | 0.77 | 2.1E-01 |
| B035DRAFT_03734 | hypothetical protein                                                            | 22.3  | 24.5  | 25.2  | 19.1  | 16.7  | 8.6   |  | 0.58 | 2.7E-01 |
| B035DRAFT_03735 | hypothetical protein                                                            | 108.6 | 125.1 | 115.0 | 116.4 | 96.6  | 55.7  |  | 0.74 | 4.6E-01 |
| B035DRAFT_03736 | hypothetical protein                                                            | 223.8 | 264.1 | 246.7 | 253.7 | 256.0 | 225.4 |  | 1.00 | 9.9E-01 |
| B035DRAFT_03737 | hypothetical protein                                                            | 12.7  | 18.0  | 13.0  | 19.6  | 18.7  | 22.0  |  | 1.39 | 1.9E-01 |
| B035DRAFT_03738 | Dipeptidyl aminopeptidases/acylaminoacyl-peptidases (CE10)                      | 12.2  | 14.5  | 14.3  | 13.6  | 14.7  | 16.8  |  | 1.10 | 5.3E-01 |
| B035DRAFT_03739 | Predicted metal-dependent membrane protease                                     | 20.1  | 18.7  | 21.5  | 17.1  | 20.6  | 23.3  |  | 1.01 | 9.8E-01 |
| B035DRAFT_03740 | hypothetical protein                                                            | 14.3  | 16.7  | 14.5  | 12.9  | 11.3  | 14.0  |  | 0.84 | 2.5E-01 |
| B035DRAFT_03741 | hypothetical protein                                                            | 9.6   | 10.0  | 9.6   | 12.3  | 8.7   | 12.2  |  | 1.12 | 5.8E-01 |
| B035DRAFT_03742 | hypothetical protein                                                            | 12.1  | 14.1  | 17.3  | 9.0   | 9.0   | 9.1   |  | 0.63 | 7.9E-02 |
| B035DRAFT_03743 | Predicted transcriptional regulator                                             | 11.1  | 12.9  | 18.3  | 18.4  | 13.7  | 10.1  |  | 0.99 | 9.8E-01 |
| B035DRAFT_03744 | Superfamily II DNA and RNA helicases( EC:3.6.4.13 )                             | 879.6 | 794.8 | 713.5 | 835.1 | 908.1 | 742.5 |  | 1.04 | 8.0E-01 |
| B035DRAFT_03745 | Peptidase S46.                                                                  | 139.6 | 146.4 | 142.2 | 131.3 | 150.4 | 149.7 |  | 1.01 | 9.5E-01 |
| B035DRAFT_03746 | TIGR00341 family protein                                                        | 164.0 | 169.3 | 158.7 | 141.3 | 169.9 | 168.1 |  | 0.97 | 8.1E-01 |
| B035DRAFT_03747 | Membrane protein involved in the export of O-antigen and teichoic acid          | 160.7 | 159.8 | 152.8 | 133.7 | 166.8 | 167.5 |  | 0.98 | 9.2E-01 |
| B035DRAFT_03748 | Holliday junction DNA helicase, RuvB subunit( EC:3.6.4.12 )                     | 253.0 | 239.3 | 265.5 | 228.5 | 236.3 | 157.1 |  | 0.81 | 3.9E-01 |
| B035DRAFT_03749 | Site-specific recombinase XerD                                                  | 262.6 | 315.8 | 288.7 | 244.2 | 247.3 | 317.3 |  | 0.93 | 6.9E-01 |

|                 |                                                                                            |        |        |        |        |        |        |      |         |
|-----------------|--------------------------------------------------------------------------------------------|--------|--------|--------|--------|--------|--------|------|---------|
| B035DRAFT_03750 | hypothetical protein                                                                       | 350.8  | 465.5  | 414.8  | 345.0  | 284.3  | 439.1  | 0.86 | 5.8E-01 |
| B035DRAFT_03751 | hypothetical protein                                                                       | 177.8  | 223.5  | 199.0  | 205.2  | 173.8  | 236.3  | 1.02 | 9.3E-01 |
| B035DRAFT_03752 | hypothetical protein                                                                       | 0.0    | 0.0    | 0.0    | 0.0    | 0.0    | 0.0    | 0.00 |         |
| B035DRAFT_03753 | putative efflux protein, MATE family                                                       | 29.4   | 37.1   | 31.9   | 17.9   | 21.6   | 24.2   | 0.65 | 9.8E-02 |
| B035DRAFT_03754 | Acetyltransferase (isoleucine patch superfamily)                                           | 24.3   | 22.3   | 28.6   | 18.0   | 20.3   | 26.4   | 0.85 | 5.2E-01 |
| B035DRAFT_03755 | hypothetical protein                                                                       | 32.7   | 41.6   | 38.1   | 27.1   | 37.3   | 39.3   | 0.92 | 7.3E-01 |
| B035DRAFT_03756 | Protein of unknown function (DUF3584).                                                     | 30.5   | 34.0   | 28.8   | 22.9   | 26.8   | 29.4   | 0.85 | 3.1E-01 |
| B035DRAFT_03757 | hypothetical protein                                                                       | 38.3   | 45.5   | 34.6   | 24.5   | 31.6   | 36.2   | 0.77 | 3.3E-01 |
| B035DRAFT_03758 | hypothetical protein                                                                       | 29.4   | 30.2   | 28.5   | 27.9   | 25.7   | 34.0   | 0.99 | 9.5E-01 |
| B035DRAFT_03759 | Predicted transcriptional regulators                                                       | 27.7   | 29.5   | 28.5   | 22.7   | 24.2   | 34.1   | 0.93 | 7.7E-01 |
| B035DRAFT_03760 | AraC-type DNA-binding domain-containing proteins                                           | 31.7   | 37.2   | 34.5   | 39.2   | 36.2   | 39.1   | 1.11 | 3.1E-01 |
| B035DRAFT_03761 | hypothetical protein                                                                       | 6.7    | 4.7    | 4.9    | 8.5    | 3.6    | 3.7    | 0.90 | 8.6E-01 |
| B035DRAFT_03762 | Uncharacterized homolog of gamma-carboxymuconolactone decarboxylase subunit( EC:4.1.1.44 ) | 12.7   | 9.5    | 14.0   | 9.4    | 9.4    | 10.8   | 0.83 | 4.1E-01 |
| B035DRAFT_03763 | Flavodoxins                                                                                | 16.1   | 19.0   | 13.4   | 14.1   | 15.9   | 18.4   | 1.00 | 9.9E-01 |
| B035DRAFT_03764 | hypothetical protein                                                                       | 14.4   | 15.2   | 11.2   | 13.8   | 11.9   | 15.5   | 1.01 | 9.7E-01 |
| B035DRAFT_03765 | Viral (Superfamily 1) RNA helicase.                                                        | 40.7   | 34.0   | 28.9   | 26.2   | 30.7   | 31.5   | 0.86 | 4.6E-01 |
| B035DRAFT_03766 | hypothetical protein                                                                       | 0.0    | 0.0    | 0.0    | 0.0    | 0.0    | 0.0    | 0.00 |         |
| B035DRAFT_03767 | Sulfotransferase domain.                                                                   | 153.1  | 144.2  | 148.4  | 200.5  | 204.3  | 199.3  | 1.36 | 2.8E-03 |
| B035DRAFT_03768 | sulfate adenylyltransferase, large subunit( EC:2.7.7.4 )                                   | 150.6  | 134.7  | 126.3  | 152.8  | 188.4  | 162.2  | 1.22 | 2.2E-01 |
| B035DRAFT_03769 | sulfate adenylyltransferase, small subunit( EC:2.7.7.4 )                                   | 96.9   | 89.6   | 83.8   | 100.0  | 132.3  | 111.4  | 1.27 | 2.1E-01 |
| B035DRAFT_03770 | Adenylylsulfate kinase and related kinases( EC:2.7.1.25 )                                  | 56.6   | 46.6   | 46.8   | 70.3   | 78.7   | 59.2   | 1.38 | 1.5E-01 |
| B035DRAFT_03771 | Di- and tricarboxylate transporters                                                        | 71.2   | 67.2   | 66.8   | 73.7   | 87.4   | 82.4   | 1.18 | 1.5E-01 |
| B035DRAFT_03772 | 3''(2''),5''-bisphosphate nucleotidase, bacterial                                          | 97.8   | 81.5   | 90.9   | 92.2   | 116.5  | 72.6   | 1.03 | 9.3E-01 |
| B035DRAFT_03773 | Outer membrane protein/protective antigen OMA87                                            | 53.2   | 56.2   | 52.3   | 59.6   | 71.4   | 67.3   | 1.22 | 1.2E-01 |
| B035DRAFT_03774 | hypothetical protein                                                                       | 68.1   | 63.1   | 72.4   | 62.3   | 62.8   | 30.7   | 0.73 | 4.7E-01 |
| B035DRAFT_03775 | Peptidase C10 family                                                                       | 103.7  | 93.8   | 108.7  | 116.9  | 119.5  | 60.1   | 0.93 | 8.6E-01 |
| B035DRAFT_03776 | Two component regulator propeller.                                                         | 14.2   | 15.5   | 16.4   | 14.0   | 15.2   | 19.0   | 1.04 | 8.4E-01 |
| B035DRAFT_03777 | hypothetical protein                                                                       | 0.0    | 0.0    | 0.0    | 0.0    | 0.0    | 0.0    | 0.00 |         |
| B035DRAFT_03778 | TonB-linked outer membrane protein, SusC/RagA family                                       | 849.4  | 836.2  | 823.5  | 510.2  | 713.6  | 875.9  | 0.82 | 4.8E-01 |
| B035DRAFT_03779 | SusD family                                                                                | 1108.3 | 1082.2 | 969.6  | 608.0  | 893.0  | 1018.3 | 0.78 | 4.0E-01 |
| B035DRAFT_03780 | Predicted membrane protein                                                                 | 96.1   | 117.1  | 107.0  | 120.5  | 128.6  | 135.6  | 1.20 | 1.8E-01 |
| B035DRAFT_03781 | ABC-type antimicrobial peptide transport system, permease component                        | 24.9   | 28.8   | 32.1   | 31.9   | 37.6   | 36.2   | 1.23 | 2.3E-01 |
| B035DRAFT_03782 | ABC-type antimicrobial peptide transport system, permease component                        | 37.8   | 38.6   | 36.6   | 37.8   | 41.1   | 48.0   | 1.12 | 4.0E-01 |
| B035DRAFT_03783 | Lysozyme M1 (1,4-beta-N-acetylmuramidase) (GH25)                                           | 101.4  | 114.1  | 103.7  | 97.3   | 111.9  | 123.4  | 1.04 | 8.0E-01 |
| B035DRAFT_03784 | diphosphate--fructose-6-phosphate 1-phosphotransferase( EC:2.7.1.90 )                      | 1263.7 | 1332.7 | 1309.2 | 1201.3 | 1410.7 | 1560.5 | 1.06 | 6.7E-01 |
| B035DRAFT_03785 | hypothetical protein                                                                       | 1192.0 | 1283.1 | 1122.7 | 1312.6 | 1138.3 | 1422.4 | 1.07 | 6.0E-01 |
| B035DRAFT_03786 | 1-acyl-sn-glycerol-3-phosphate acyltransferase                                             | 1349.6 | 1530.1 | 1376.6 | 1475.5 | 1361.7 | 1665.1 | 1.06 | 6.7E-01 |
| B035DRAFT_03787 | hypothetical protein                                                                       | 81.7   | 108.5  | 92.4   | 100.6  | 108.3  | 133.7  | 1.21 | 3.8E-01 |
| B035DRAFT_03788 | hypothetical protein                                                                       | 1532.3 | 1601.1 | 1570.3 | 1529.4 | 1497.1 | 1556.3 | 0.97 | 4.0E-01 |
| B035DRAFT_03789 | Galactosyltransferase.                                                                     | 109.3  | 125.2  | 136.8  | 82.8   | 76.7   | 103.7  | 0.71 | 1.5E-01 |
| B035DRAFT_03790 | hypothetical protein                                                                       | 100.8  | 127.6  | 117.3  | 173.4  | 189.9  | 191.1  | 1.61 | 4.0E-02 |
| B035DRAFT_03791 | RNA polymerase sigma-70 factor, Bacteroides expansion family 1                             | 70.1   | 90.5   | 81.8   | 88.0   | 108.9  | 113.1  | 1.28 | 2.5E-01 |
| B035DRAFT_03792 | Fe2+-dicitrate sensor, membrane component                                                  | 76.2   | 74.7   | 75.9   | 75.5   | 92.4   | 79.1   | 1.08 | 4.6E-01 |
| B035DRAFT_03793 | TonB-linked outer membrane protein, SusC/RagA family                                       | 13.8   | 14.3   | 12.2   | 11.4   | 13.7   | 14.7   | 0.98 | 9.2E-01 |
| B035DRAFT_03794 | SusD family                                                                                | 38.8   | 35.3   | 34.0   | 25.4   | 32.8   | 31.6   | 0.83 | 2.7E-01 |
| B035DRAFT_03795 | Predicted phosphohydrolases                                                                | 49.3   | 45.5   | 39.7   | 40.9   | 32.8   | 43.6   | 0.87 | 4.7E-01 |
| B035DRAFT_03796 | Beta-galactosidase/beta-glucuronidase( EC:3.2.1.23 ) (GH2)                                 | 31.6   | 28.9   | 27.0   | 20.9   | 23.6   | 23.8   | 0.78 | 9.4E-02 |
| B035DRAFT_03797 | hypothetical protein                                                                       | 9.3    | 10.3   | 10.8   | 14.0   | 6.8    | 6.9    | 0.86 | 7.3E-01 |
| B035DRAFT_03798 | ( rRNA )                                                                                   | 6.5    | 11.9   | 7.7    | 4.1    | 7.9    | 9.3    |      | 6.8E-01 |



|                 |                                                                                                                                                   |      |      |       |      |      |       |      |         |
|-----------------|---------------------------------------------------------------------------------------------------------------------------------------------------|------|------|-------|------|------|-------|------|---------|
| B035DRAFT_03799 | Predicted unsaturated glucuronyl hydrolase involved in regulation of bacterial surface properties, and related proteins (GH105)                   | 40.4 | 40.5 | 38.9  | 42.9 | 52.2 | 45.4  | 1.17 | 2.0E-01 |
| B035DRAFT_03800 | TonB-linked outer membrane protein, SusC/RagA family                                                                                              | 7.5  | 6.2  | 6.7   | 6.5  | 8.9  | 9.4   | 1.19 | 4.5E-01 |
| B035DRAFT_03801 | F0F1-type ATP synthase, delta subunit (mitochondrial oligomycin sensitivity protein)                                                              | 9.7  | 8.5  | 10.8  | 9.8  | 9.9  | 12.0  | 1.10 | 6.0E-01 |
| B035DRAFT_03802 | His Kinase A (phosphoacceptor) domain./Response regulator receiver domain./Y_Y_Y domain./Histidine kinase-, DNA gyrase B-, and HSP90-like ATPase. | 33.7 | 43.6 | 43.0  | 50.6 | 54.7 | 70.2  | 1.45 | 1.7E-01 |
| B035DRAFT_03803 | hypothetical protein                                                                                                                              | 0.0  | 0.0  | 0.0   | 0.0  | 0.0  | 0.0   | 0.00 |         |
| B035DRAFT_03804 | hypothetical protein                                                                                                                              | 0.0  | 0.0  | 0.0   | 0.0  | 0.0  | 0.0   | 0.00 |         |
| B035DRAFT_03805 | hypothetical protein                                                                                                                              | 0.0  | 0.0  | 0.0   | 0.0  | 0.0  | 0.0   | 0.92 |         |
| B035DRAFT_03806 | ( miscRNA )                                                                                                                                       | 17.3 | 12.4 | 13.4  | 11.3 | 13.7 | 14.6  | 0.00 | 7.3E-01 |
| B035DRAFT_03807 | Bacteroides conjugative transposon TraJ protein                                                                                                   | 3.8  | 2.8  | 3.0   | 1.9  | 2.5  | 1.0   | 0.53 | 2.7E-01 |
| B035DRAFT_03808 | Bacteroides conjugative transposon TraK protein                                                                                                   | 2.4  | 3.5  | 3.3   | 3.1  | 2.0  | 2.7   | 0.84 | 5.9E-01 |
| B035DRAFT_03809 | hypothetical protein                                                                                                                              | 1.8  | 2.1  | 6.0   | 2.6  | 1.7  | 0.6   | 0.47 | 4.7E-01 |
| B035DRAFT_03810 | Bacteroides conjugative transposon TraM protein                                                                                                   | 2.8  | 1.8  | 1.7   | 3.0  | 2.1  | 0.9   | 0.86 | 8.5E-01 |
| B035DRAFT_03811 | Bacteroides conjugative transposon TraN protein                                                                                                   | 5.0  | 3.2  | 4.7   | 3.3  | 6.3  | 3.0   | 0.94 | 9.0E-01 |
| B035DRAFT_03812 | Conjugative transposon protein TraO.                                                                                                              | 3.0  | 4.2  | 6.2   | 3.8  | 2.2  | 0.5   | 0.39 | 4.0E-01 |
| B035DRAFT_03813 | hypothetical protein                                                                                                                              | 10.6 | 4.1  | 5.2   | 6.2  | 6.7  | 6.8   | 1.07 | 9.0E-01 |
| B035DRAFT_03814 | hypothetical protein                                                                                                                              | 8.9  | 8.6  | 1.8   | 1.6  | 9.4  | 10.8  | 1.05 | 9.8E-01 |
| B035DRAFT_03815 | hypothetical protein                                                                                                                              | 6.4  | 2.8  | 5.4   | 7.7  | 4.9  | 7.1   | 1.40 | 5.1E-01 |
| B035DRAFT_03816 | hypothetical protein                                                                                                                              | 1.6  | 0.0  | 1.3   | 3.5  | 5.0  | 5.5   | 3.07 | 6.4E-02 |
| B035DRAFT_03817 | hypothetical protein                                                                                                                              | 0.8  | 0.0  | 1.9   | 1.6  | 4.9  | 1.4   | 1.86 | 5.8E-01 |
| B035DRAFT_03818 | hypothetical protein                                                                                                                              | 1.2  | 1.1  | 1.0   | 0.7  | 1.4  | 2.2   | 1.21 | 7.7E-01 |
| B035DRAFT_03819 | hypothetical protein                                                                                                                              | 0.8  | 1.4  | 1.0   | 1.3  | 1.8  | 0.7   | 1.15 | 8.1E-01 |
| B035DRAFT_03820 | hypothetical protein                                                                                                                              | 1.4  | 1.6  | 1.7   | 2.2  | 0.0  | 1.9   | 1.31 | 2.2E-01 |
| B035DRAFT_03821 | hypothetical protein                                                                                                                              | 0.0  | 0.0  | 2.4   | 0.5  | 0.5  | 0.0   | 0.20 |         |
| B035DRAFT_03822 | hypothetical protein                                                                                                                              | 1.6  | 0.9  | 1.0   | 2.5  | 1.5  | 0.7   | 1.23 | 7.9E-01 |
| B035DRAFT_03823 | hypothetical protein                                                                                                                              | 32.4 | 49.1 | 44.7  | 66.4 | 56.6 | 60.1  | 1.47 | 1.7E-01 |
| B035DRAFT_03824 | hypothetical protein                                                                                                                              | 48.2 | 50.8 | 67.6  | 56.2 | 53.7 | 57.9  | 1.02 | 9.3E-01 |
| B035DRAFT_03825 | Response regulators consisting of a CheY-like receiver domain and a winged-helix DNA-binding domain                                               | 24.8 | 29.9 | 26.1  | 24.9 | 21.4 | 29.8  | 0.94 | 7.5E-01 |
| B035DRAFT_03826 | hypothetical protein                                                                                                                              | 52.9 | 43.8 | 50.2  | 37.3 | 32.5 | 35.7  | 0.72 | 7.0E-02 |
| B035DRAFT_03827 | hypothetical protein                                                                                                                              | 42.2 | 45.6 | 44.2  | 32.0 | 27.9 | 34.2  | 0.71 | 5.8E-02 |
| B035DRAFT_03828 | hypothetical protein                                                                                                                              | 31.7 | 43.7 | 40.5  | 21.7 | 33.8 | 37.6  | 0.79 | 5.0E-01 |
| B035DRAFT_03829 | hypothetical protein                                                                                                                              | 21.4 | 22.5 | 19.4  | 16.3 | 20.2 | 24.0  | 0.95 | 8.1E-01 |
| B035DRAFT_03830 | hypothetical protein                                                                                                                              | 8.7  | 7.6  | 18.4  | 5.7  | 17.7 | 10.8  | 0.97 | 9.7E-01 |
| B035DRAFT_03831 | hypothetical protein                                                                                                                              | 10.9 | 10.9 | 9.5   | 8.2  | 5.7  | 25.6  | 1.02 | 9.9E-01 |
| B035DRAFT_03832 | hypothetical protein                                                                                                                              | 10.9 | 10.5 | 9.8   | 4.5  | 7.4  | 12.3  | 0.71 | 5.2E-01 |
| B035DRAFT_03833 | hypothetical protein                                                                                                                              | 15.6 | 33.5 | 24.7  | 22.1 | 26.4 | 27.4  | 1.07 | 8.8E-01 |
| B035DRAFT_03834 | hypothetical protein                                                                                                                              | 45.5 | 41.7 | 43.5  | 45.3 | 48.4 | 45.1  | 1.06 | 3.5E-01 |
| B035DRAFT_03835 | hypothetical protein                                                                                                                              | 20.6 | 19.6 | 26.0  | 15.0 | 22.4 | 22.6  | 0.90 | 7.2E-01 |
| B035DRAFT_03836 | hypothetical protein                                                                                                                              | 15.1 | 15.3 | 18.7  | 13.5 | 14.6 | 19.6  | 0.96 | 8.9E-01 |
| B035DRAFT_03837 | hypothetical protein                                                                                                                              | 24.0 | 29.7 | 35.6  | 19.8 | 37.4 | 46.4  | 1.11 | 8.6E-01 |
| B035DRAFT_03838 | Protein of unknown function (DUF1573).                                                                                                            | 92.7 | 99.3 | 101.9 | 98.5 | 93.3 | 101.5 | 1.00 | 9.8E-01 |
| B035DRAFT_03839 | hypothetical protein                                                                                                                              | 0.0  | 0.0  | 0.0   | 0.0  | 0.0  | 0.0   | 0.00 |         |
| B035DRAFT_03840 | hypothetical protein                                                                                                                              | 47.2 | 41.3 | 43.3  | 36.4 | 36.2 | 36.3  | 0.83 | 6.8E-02 |
| B035DRAFT_03841 | hypothetical protein                                                                                                                              | 4.7  | 6.3  | 7.1   | 3.6  | 3.2  | 2.5   | 0.52 | 9.6E-02 |
| B035DRAFT_03842 | hypothetical protein                                                                                                                              | 5.5  | 5.0  | 3.7   | 2.6  | 2.5  | 2.1   | 0.51 | 7.4E-02 |
| B035DRAFT_03843 | VirE N-terminal domain.                                                                                                                           | 1.3  | 3.1  | 3.0   | 0.8  | 1.2  | 2.2   | 0.56 | 4.3E-01 |
| B035DRAFT_03844 | hypothetical protein                                                                                                                              | 1.8  | 1.0  | 0.0   | 2.8  | 1.6  | 0.8   | 1.14 | 8.9E-01 |

|                 |                                                                                         |        |        |        |        |        |        |      |         |
|-----------------|-----------------------------------------------------------------------------------------|--------|--------|--------|--------|--------|--------|------|---------|
| B035DRAFT_03845 | hypothetical protein                                                                    | 8.1    | 10.3   | 9.0    | 10.1   | 12.0   | 8.0    | 1.09 | 7.3E-01 |
| B035DRAFT_03846 | Site-specific DNA methylase                                                             | 6.5    | 8.6    | 8.2    | 8.8    | 9.3    | 6.5    | 1.06 | 8.4E-01 |
| B035DRAFT_03847 | hypothetical protein                                                                    | 8.9    | 9.0    | 12.3   | 4.1    | 6.7    | 9.9    | 0.65 | 3.9E-01 |
| B035DRAFT_03848 | hypothetical protein                                                                    | 9.1    | 17.8   | 9.3    | 7.0    | 9.1    | 8.2    | 0.71 | 4.1E-01 |
| B035DRAFT_03849 | hypothetical protein                                                                    | 266.4  | 312.5  | 267.5  | 240.5  | 252.5  | 347.4  | 0.98 | 9.5E-01 |
| B035DRAFT_03850 | hypothetical protein                                                                    | 680.3  | 774.7  | 728.3  | 665.5  | 668.0  | 965.0  | 1.04 | 8.8E-01 |
| B035DRAFT_03851 | hypothetical protein                                                                    | 0.0    | 0.0    | 0.0    | 0.0    | 0.0    | 0.0    | 0.00 |         |
| B035DRAFT_03852 | hypothetical protein                                                                    | 28.1   | 25.9   | 26.8   | 23.2   | 24.6   | 21.3   | 0.86 | 1.5E-01 |
| B035DRAFT_03853 | AraC-type DNA-binding domain-containing proteins                                        | 19.7   | 17.6   | 22.2   | 17.8   | 20.9   | 20.3   | 0.99 | 9.8E-01 |
| B035DRAFT_03854 | 3-carboxymuconate cyclase                                                               | 14.9   | 12.1   | 16.3   | 11.1   | 11.0   | 10.5   | 0.76 | 1.6E-01 |
| B035DRAFT_03855 | Hydrolases of the alpha/beta superfamily                                                | 47.0   | 39.7   | 46.5   | 40.9   | 45.6   | 39.1   | 0.94 | 6.6E-01 |
| B035DRAFT_03856 | TonB-linked outer membrane protein, SusC/RagA family                                    | 274.0  | 280.7  | 262.6  | 252.5  | 269.6  | 282.5  | 0.98 | 8.2E-01 |
| B035DRAFT_03857 | SusD family                                                                             | 212.7  | 197.6  | 214.8  | 192.5  | 222.6  | 198.8  | 0.98 | 8.5E-01 |
| B035DRAFT_03858 | Cyclic nucleotide-binding domain.                                                       | 390.8  | 368.9  | 352.5  | 295.4  | 323.6  | 349.5  | 0.87 | 2.2E-01 |
| B035DRAFT_03859 | Type IV secretory pathway, VirD4 components                                             | 28.3   | 26.6   | 30.3   | 32.3   | 32.7   | 26.2   | 1.07 | 6.6E-01 |
| B035DRAFT_03860 | Relaxase/Mobilisation nuclease domain.                                                  | 13.0   | 9.3    | 13.0   | 16.8   | 14.3   | 5.6    | 0.95 | 9.5E-01 |
| B035DRAFT_03861 | hypothetical protein                                                                    | 11.5   | 11.1   | 15.0   | 14.6   | 11.1   | 7.2    | 0.85 | 7.0E-01 |
| B035DRAFT_03862 | ATPases involved in chromosome partitioning                                             | 26.4   | 16.5   | 27.5   | 31.0   | 29.3   | 10.7   | 0.93 | 9.3E-01 |
| B035DRAFT_03863 | Protein of unknown function (DUF3408).                                                  | 14.9   | 10.2   | 13.1   | 24.2   | 14.9   | 3.5    | 0.86 | 9.0E-01 |
| B035DRAFT_03864 | Protein of unknown function (DUF3408).                                                  | 30.6   | 16.4   | 20.1   | 19.4   | 14.5   | 6.2    | 0.56 | 4.1E-01 |
| B035DRAFT_03865 | hypothetical protein                                                                    | 55.1   | 23.4   | 46.8   | 65.4   | 41.6   | 9.7    | 0.76 | 8.2E-01 |
| B035DRAFT_03866 | hypothetical protein                                                                    | 63.3   | 40.3   | 60.6   | 98.6   | 99.1   | 50.7   | 1.47 | 4.2E-01 |
| B035DRAFT_03867 | hypothetical protein                                                                    | 98.9   | 63.1   | 100.6  | 119.1  | 132.4  | 64.1   | 1.17 | 7.6E-01 |
| B035DRAFT_03868 | Bacteroides conjugation system ATPase, TraG family                                      | 71.2   | 36.6   | 59.1   | 65.6   | 67.5   | 20.5   | 0.84 | 8.4E-01 |
| B035DRAFT_03869 | hypothetical protein                                                                    | 52.3   | 22.2   | 35.6   | 51.8   | 46.2   | 14.5   | 0.94 | 9.5E-01 |
| B035DRAFT_03870 | hypothetical protein                                                                    | 41.4   | 19.8   | 25.9   | 43.1   | 43.3   | 20.3   | 1.21 | 7.6E-01 |
| B035DRAFT_03871 | hypothetical protein                                                                    | 256.9  | 257.1  | 242.9  | 256.2  | 225.6  | 317.6  | 1.05 | 8.2E-01 |
| B035DRAFT_03872 | RHS repeat-associated core domain                                                       | 44.2   | 35.1   | 41.4   | 36.3   | 33.4   | 29.9   | 0.83 | 2.7E-01 |
| B035DRAFT_03873 | Protein of unknown function (DUF877).                                                   | 3.8    | 3.3    | 4.0    | 4.4    | 4.0    | 2.2    | 0.92 | 8.5E-01 |
| B035DRAFT_03874 | hypothetical protein                                                                    | 3.6    | 2.5    | 2.6    | 3.4    | 3.9    | 3.9    | 1.30 | 2.7E-01 |
| B035DRAFT_03875 | hypothetical protein                                                                    | 2.0    | 0.6    | 1.1    | 1.6    | 1.9    | 0.5    | 1.04 | 9.8E-01 |
| B035DRAFT_03876 | Uncharacterized protein conserved in bacteria                                           | 1.4    | 0.9    | 1.4    | 1.4    | 1.4    | 1.3    | 1.13 | 6.8E-01 |
| B035DRAFT_03877 | hypothetical protein                                                                    | 100.8  | 103.8  | 113.9  | 90.9   | 89.8   | 79.6   | 0.82 | 1.2E-01 |
| B035DRAFT_03878 | hypothetical protein                                                                    | 0.0    | 0.0    | 0.0    | 0.0    | 0.0    | 0.0    | 0.00 |         |
| B035DRAFT_03879 | hypothetical protein                                                                    | 252.5  | 308.4  | 282.4  | 334.3  | 294.0  | 298.8  | 1.10 | 4.5E-01 |
| B035DRAFT_03880 | ( tRNA )                                                                                | 197.4  | 178.5  | 181.5  | 140.9  | 91.5   | 45.9   | 0.45 | 2.3E-01 |
| B035DRAFT_03881 | Putative p-aminobenzoyl-glutamate transporter                                           | 51.1   | 68.8   | 59.2   | 56.3   | 62.3   | 78.7   | 1.10 | 7.0E-01 |
| B035DRAFT_03882 | Response regulator containing a CheY-like receiver domain and an HTH DNA-binding domain | 51.9   | 58.2   | 49.3   | 57.8   | 58.4   | 68.7   | 1.16 | 3.0E-01 |
| B035DRAFT_03883 | Histidine kinase-, DNA gyrase B-, and HSP90-like ATPase.                                | 31.4   | 34.0   | 33.5   | 32.4   | 37.0   | 43.9   | 1.14 | 4.4E-01 |
| B035DRAFT_03884 | Histone H1-like protein Hc1.                                                            | 1650.1 | 2635.9 | 2185.6 | 2646.3 | 2092.7 | 2602.1 | 1.15 | 6.2E-01 |
| B035DRAFT_03885 | L-lactate transport                                                                     | 260.0  | 255.9  | 287.6  | 266.5  | 173.3  | 239.2  | 0.83 | 4.5E-01 |
| B035DRAFT_03886 | hypothetical protein                                                                    | 20.0   | 23.2   | 21.5   | 13.7   | 16.9   | 19.1   | 0.76 | 2.1E-01 |
| B035DRAFT_03887 | Transposase and inactivated derivatives                                                 | 93.4   | 112.9  | 96.4   | 84.4   | 93.2   | 91.1   | 0.89 | 3.5E-01 |
| B035DRAFT_03888 | hypothetical protein                                                                    | 101.5  | 114.0  | 102.8  | 111.5  | 111.3  | 114.9  | 1.06 | 3.9E-01 |
| B035DRAFT_03889 | hypothetical protein                                                                    | 16.1   | 15.6   | 22.8   | 9.9    | 8.5    | 21.9   | 0.69 | 5.1E-01 |
| B035DRAFT_03890 | hypothetical protein                                                                    | 3.0    | 3.6    | 3.0    | 2.1    | 2.0    | 2.4    | 0.68 | 7.9E-02 |
| B035DRAFT_03891 | hypothetical protein                                                                    | 3.5    | 2.3    | 4.2    | 4.2    | 5.0    | 3.2    | 1.24 | 5.9E-01 |
| B035DRAFT_03892 | Outer membrane protein and related peptidoglycan-associated (lipo)proteins              | 52.8   | 22.0   | 50.7   | 34.0   | 21.1   | 6.4    | 0.43 | 4.2E-01 |
| B035DRAFT_03893 | hypothetical protein                                                                    | 5.9    | 2.6    | 6.9    | 5.0    | 3.8    | 1.3    | 0.62 | 6.0E-01 |

|                 |                                                                                                                                                      |       |       |       |       |       |       |      |         |
|-----------------|------------------------------------------------------------------------------------------------------------------------------------------------------|-------|-------|-------|-------|-------|-------|------|---------|
| B035DRAFT_03894 | hypothetical protein                                                                                                                                 | 8.5   | 8.8   | 9.6   | 7.2   | 7.5   | 6.5   | 0.79 | 8.6E-02 |
| B035DRAFT_03895 | hypothetical protein                                                                                                                                 | 12.8  | 9.8   | 11.3  | 8.0   | 6.9   | 7.4   | 0.66 | 7.2E-02 |
| B035DRAFT_03896 | Transposase and inactivated derivatives, IS30 family                                                                                                 | 171.5 | 172.7 | 151.3 | 153.0 | 167.8 | 111.7 | 0.86 | 5.2E-01 |
| B035DRAFT_03897 | Bacterial nucleoid DNA-binding protein                                                                                                               | 81.6  | 72.7  | 78.1  | 73.2  | 65.3  | 41.0  | 0.75 | 3.9E-01 |
| B035DRAFT_03898 | Predicted transcriptional regulator containing an HTH domain and an uncharacterized domain shared with the mammalian protein Schlafen( EC:3.6.4.12 ) | 59.9  | 60.5  | 57.3  | 74.5  | 80.9  | 79.3  | 1.32 | 1.7E-02 |
| B035DRAFT_03899 | DNA primase (bacterial type)                                                                                                                         | 44.9  | 35.6  | 46.0  | 48.7  | 40.8  | 27.9  | 0.91 | 7.9E-01 |
| B035DRAFT_03900 | hypothetical protein                                                                                                                                 | 46.4  | 49.1  | 40.3  | 43.6  | 54.8  | 47.4  | 1.07 | 6.7E-01 |
| B035DRAFT_03901 | hypothetical protein                                                                                                                                 | 20.3  | 18.8  | 20.3  | 26.3  | 21.3  | 19.4  | 1.12 | 5.1E-01 |
| B035DRAFT_03902 | hypothetical protein                                                                                                                                 | 14.1  | 21.5  | 18.2  | 27.8  | 23.9  | 18.4  | 1.30 | 4.0E-01 |
| B035DRAFT_03903 | Predicted transcriptional regulator with C-terminal CBS domains                                                                                      | 99.3  | 97.8  | 104.1 | 150.1 | 111.5 | 111.4 | 1.23 | 2.9E-01 |
| B035DRAFT_03904 | hypothetical protein                                                                                                                                 | 0.0   | 0.0   | 0.0   | 0.0   | 0.0   | 0.0   | 0.00 |         |
| B035DRAFT_03905 | hypothetical protein                                                                                                                                 | 0.0   | 0.0   | 0.0   | 0.0   | 0.0   | 0.0   | 0.00 |         |
| B035DRAFT_03906 | Transcriptional regulator                                                                                                                            | 104.6 | 148.1 | 125.3 | 96.9  | 100.6 | 117.0 | 0.84 | 4.0E-01 |
| B035DRAFT_03907 | 3-oxoacyl-[acyl-carrier-protein] synthase III( EC:2.3.1.180 )                                                                                        | 208.8 | 203.6 | 198.3 | 187.7 | 211.4 | 257.8 | 1.07 | 7.1E-01 |
| B035DRAFT_03908 | Transcriptional regulator                                                                                                                            | 121.6 | 119.8 | 110.2 | 119.7 | 144.3 | 161.4 | 1.20 | 3.0E-01 |
| B035DRAFT_03909 | hypothetical protein                                                                                                                                 | 253.8 | 255.0 | 258.4 | 318.5 | 323.0 | 327.2 | 1.26 | 6.3E-04 |
| B035DRAFT_03910 | hypothetical protein                                                                                                                                 | 311.8 | 267.9 | 281.9 | 345.3 | 359.2 | 306.8 | 1.17 | 2.2E-01 |
| B035DRAFT_03911 | hypothetical protein                                                                                                                                 | 296.0 | 280.7 | 267.3 | 366.8 | 391.4 | 341.7 | 1.30 | 5.5E-02 |
| B035DRAFT_03912 | hypothetical protein                                                                                                                                 | 25.6  | 20.8  | 17.6  | 25.1  | 21.7  | 32.6  | 1.24 | 4.7E-01 |
| B035DRAFT_03913 | hypothetical protein                                                                                                                                 | 101.4 | 107.9 | 97.4  | 86.5  | 100.4 | 128.4 | 1.02 | 9.5E-01 |
| B035DRAFT_03914 | hypothetical protein                                                                                                                                 | 94.9  | 107.6 | 112.1 | 99.9  | 100.4 | 124.3 | 1.03 | 8.7E-01 |
| B035DRAFT_03915 | Site-specific recombinase XerD                                                                                                                       | 1.6   | 5.8   | 3.0   | 2.8   | 3.2   | 2.9   | 0.99 | 9.9E-01 |
| B035DRAFT_03916 | hypothetical protein                                                                                                                                 | 4.7   | 3.9   | 6.0   | 4.5   | 4.0   | 3.2   | 0.81 | 4.6E-01 |
| B035DRAFT_03917 | hypothetical protein                                                                                                                                 | 4.7   | 5.4   | 6.0   | 2.9   | 2.3   | 3.0   | 0.51 | 4.3E-02 |
| B035DRAFT_03918 | Site-specific recombinase XerD                                                                                                                       | 13.6  | 13.1  | 15.7  | 10.0  | 12.4  | 9.2   | 0.74 | 1.8E-01 |
| B035DRAFT_03919 | Site-specific recombinase XerD                                                                                                                       | 13.8  | 9.9   | 10.1  | 8.0   | 11.6  | 11.5  | 0.92 | 7.8E-01 |
| B035DRAFT_03920 | hypothetical protein                                                                                                                                 | 11.7  | 3.9   | 10.8  | 9.3   | 14.8  | 4.6   | 1.09 | 9.3E-01 |
| B035DRAFT_03921 | Predicted site-specific integrase-resolvase                                                                                                          | 211.6 | 192.6 | 163.6 | 214.7 | 234.4 | 139.1 | 1.02 | 9.7E-01 |
| B035DRAFT_03922 | hypothetical protein                                                                                                                                 | 49.6  | 61.9  | 57.9  | 57.5  | 61.6  | 85.2  | 1.19 | 4.8E-01 |
| B035DRAFT_03923 | hypothetical protein                                                                                                                                 | 114.0 | 128.6 | 120.3 | 143.9 | 129.6 | 161.1 | 1.19 | 2.2E-01 |
| B035DRAFT_03924 | hypothetical protein                                                                                                                                 | 35.7  | 34.2  | 32.7  | 24.3  | 25.9  | 17.6  | 0.65 | 1.3E-01 |
| B035DRAFT_03925 | hypothetical protein                                                                                                                                 | 28.6  | 31.4  | 30.6  | 21.4  | 19.1  | 21.0  | 0.68 | 2.1E-02 |
| B035DRAFT_03926 | hypothetical protein                                                                                                                                 | 58.8  | 54.2  | 40.4  | 43.0  | 20.3  | 31.1  | 0.60 | 2.8E-01 |
| B035DRAFT_03927 | hypothetical protein                                                                                                                                 | 45.5  | 46.5  | 43.0  | 36.0  | 45.1  | 60.4  | 1.03 | 9.3E-01 |
| B035DRAFT_03928 | hypothetical protein                                                                                                                                 | 19.5  | 29.8  | 26.7  | 16.0  | 18.7  | 19.8  | 0.73 | 2.5E-01 |
| B035DRAFT_03929 | hypothetical protein                                                                                                                                 | 39.8  | 25.2  | 22.2  | 18.2  | 13.0  | 24.0  | 0.63 | 3.3E-01 |
| B035DRAFT_03930 | hypothetical protein                                                                                                                                 | 39.4  | 41.6  | 47.3  | 28.3  | 29.3  | 41.6  | 0.76 | 3.0E-01 |
| B035DRAFT_03931 | hypothetical protein                                                                                                                                 | 30.7  | 45.0  | 33.2  | 29.9  | 32.3  | 58.0  | 1.07 | 8.9E-01 |
| B035DRAFT_03932 | hypothetical protein                                                                                                                                 | 29.0  | 30.1  | 29.7  | 19.7  | 19.6  | 24.5  | 0.71 | 7.8E-02 |
| B035DRAFT_03933 | hypothetical protein                                                                                                                                 | 79.4  | 87.6  | 110.6 | 81.1  | 75.4  | 94.0  | 0.91 | 6.5E-01 |
| B035DRAFT_03934 | hypothetical protein                                                                                                                                 | 0.0   | 0.0   | 0.0   | 0.0   | 0.0   | 0.0   | 0.00 |         |
| B035DRAFT_03935 | Superfamily I DNA and RNA helicases                                                                                                                  | 151.2 | 174.2 | 168.2 | 156.4 | 155.8 | 192.6 | 1.02 | 9.1E-01 |
| B035DRAFT_03936 | Predicted ATP-dependent endonuclease of the OLD family                                                                                               | 176.5 | 172.0 | 167.0 | 143.3 | 156.8 | 197.3 | 0.96 | 8.1E-01 |
| B035DRAFT_03937 | Predicted ATPase (AAA+ superfamily)                                                                                                                  | 249.3 | 270.3 | 226.6 | 228.9 | 250.5 | 274.6 | 1.01 | 9.5E-01 |
| B035DRAFT_03938 | RteC protein.                                                                                                                                        | 21.0  | 17.5  | 19.0  | 23.9  | 23.3  | 19.6  | 1.16 | 3.3E-01 |
| B035DRAFT_03939 | Dihydrofolate reductase                                                                                                                              | 146.5 | 167.0 | 171.8 | 181.7 | 156.8 | 130.9 | 0.96 | 8.5E-01 |
| B035DRAFT_03940 | hypothetical protein                                                                                                                                 | 0.0   | 0.0   | 0.0   | 0.0   | 0.0   | 0.0   | 0.00 |         |
| B035DRAFT_03941 | hypothetical protein                                                                                                                                 | 31.6  | 37.7  | 43.2  | 15.4  | 18.2  | 21.7  | 0.49 | 5.7E-02 |
| B035DRAFT_03942 | radical SAM peptide maturase, GG-Bacteroidales family                                                                                                | 12.8  | 13.7  | 12.6  | 7.0   | 6.4   | 5.8   | 0.49 | 7.6E-03 |

|                 |                                                                                                   |        |        |        |        |        |        |      |         |
|-----------------|---------------------------------------------------------------------------------------------------|--------|--------|--------|--------|--------|--------|------|---------|
| B035DRAFT_03943 | hypothetical protein                                                                              | 11.6   | 13.3   | 13.6   | 5.5    | 4.9    | 4.7    | 0.39 | 5.9E-03 |
| B035DRAFT_03944 | natural product precursor, GG-Bacteroidales family                                                | 8.7    | 17.1   | 14.7   | 6.4    | 5.5    | 7.9    | 0.50 | 1.6E-01 |
| B035DRAFT_03945 | glycosyltransferase, GG-Bacteroidales peptide system (GT4)                                        | 6.7    | 6.6    | 8.6    | 3.9    | 3.3    | 4.5    | 0.54 | 6.8E-02 |
| B035DRAFT_03946 | hypothetical protein                                                                              | 4.9    | 5.3    | 6.3    | 5.8    | 1.8    | 2.4    | 0.53 | 3.5E-01 |
| B035DRAFT_03947 | Protein of unknown function (DUF3244).                                                            | 13.4   | 12.0   | 15.9   | 14.7   | 10.1   | 18.9   | 1.03 | 9.5E-01 |
| B035DRAFT_03948 | hypothetical protein                                                                              | 7.6    | 7.9    | 6.5    | 4.8    | 7.2    | 9.9    | 0.96 | 9.2E-01 |
| B035DRAFT_03949 | Glycosyltransferase (GT4)                                                                         | 2.4    | 4.6    | 3.2    | 2.1    | 1.1    | 3.3    | 0.60 | 4.5E-01 |
| B035DRAFT_03950 | Protein-disulfide isomerase                                                                       | 3.8    | 6.9    | 4.7    | 2.6    | 2.6    | 2.8    | 0.53 | 1.2E-01 |
| B035DRAFT_03951 | Peroxisredoxin                                                                                    | 4.8    | 8.0    | 6.0    | 4.8    | 2.9    | 3.9    | 0.61 | 2.4E-01 |
| B035DRAFT_03952 | hypothetical protein                                                                              | 30.0   | 29.8   | 32.0   | 30.0   | 39.8   | 36.6   | 1.15 | 3.8E-01 |
| B035DRAFT_03953 | ABC-type bacteriocin/lantibiotic exporters, contain an N-terminal double-glycine peptidase domain | 22.5   | 15.2   | 19.4   | 17.5   | 14.0   | 7.9    | 0.66 | 4.0E-01 |
| B035DRAFT_03954 | Galactosyltransferase (GT2)                                                                       | 126.3  | 118.6  | 135.8  | 69.2   | 85.1   | 79.2   | 0.61 | 3.3E-02 |
| B035DRAFT_03955 | hypothetical protein                                                                              | 92.8   | 104.1  | 105.9  | 51.9   | 60.3   | 78.5   | 0.62 | 1.1E-01 |
| B035DRAFT_03956 | hypothetical protein                                                                              | 81.1   | 86.7   | 87.1   | 41.6   | 44.7   | 44.9   | 0.51 | 1.4E-03 |
| B035DRAFT_03957 | natural product precursor, GG-Bacteroidales family                                                | 78.8   | 86.2   | 95.9   | 46.0   | 57.6   | 60.2   | 0.63 | 7.2E-02 |
| B035DRAFT_03958 | hypothetical protein                                                                              | 69.3   | 78.3   | 87.3   | 41.3   | 50.5   | 63.8   | 0.65 | 1.7E-01 |
| B035DRAFT_03959 | hypothetical protein                                                                              | 72.9   | 77.0   | 92.7   | 66.2   | 69.7   | 74.7   | 0.87 | 3.6E-01 |
| B035DRAFT_03960 | Lanthionine synthetase C-like protein.                                                            | 77.8   | 96.4   | 97.8   | 83.4   | 106.9  | 123.5  | 1.14 | 5.9E-01 |
| B035DRAFT_03961 | hypothetical protein                                                                              | 75.5   | 83.0   | 58.5   | 73.7   | 83.4   | 101.1  | 1.19 | 4.8E-01 |
| B035DRAFT_03962 | hypothetical protein                                                                              | 463.3  | 586.2  | 539.7  | 741.3  | 671.4  | 763.6  | 1.37 | 9.4E-02 |
| B035DRAFT_03963 | hypothetical protein                                                                              | 0.0    | 0.0    | 0.0    | 0.0    | 0.0    | 0.0    | 0.00 |         |
| B035DRAFT_03964 | hypothetical protein                                                                              | 0.0    | 0.0    | 0.0    | 0.0    | 0.0    | 0.0    | 0.00 |         |
| B035DRAFT_03965 | Alkyl hydroperoxide reductase, large subunit                                                      | 447.8  | 414.9  | 435.6  | 413.4  | 455.4  | 257.1  | 0.84 | 5.9E-01 |
| B035DRAFT_03966 | ( tRNA )                                                                                          | 663.9  | 997.1  | 886.5  | 700.4  | 322.7  | 168.9  | 0.40 | 2.8E-01 |
| B035DRAFT_03967 | ( tRNA )                                                                                          | 490.0  | 1119.5 | 1241.1 | 590.6  | 446.9  | 447.2  | 0.56 | 3.2E-01 |
| B035DRAFT_03968 | Sugar kinases, ribokinase family                                                                  | 42.4   | 46.8   | 47.3   | 41.8   | 52.6   | 38.4   | 0.97 | 8.6E-01 |
| B035DRAFT_03969 | C-terminal peptidase (prc)( EC:3.4.21.102 )                                                       | 210.2  | 212.1  | 217.6  | 351.0  | 334.4  | 253.2  | 1.45 | 1.2E-01 |
| B035DRAFT_03970 | hypothetical protein                                                                              | 85.6   | 94.1   | 79.9   | 164.6  | 161.6  | 154.6  | 1.86 | 7.5E-03 |
| B035DRAFT_03971 | hypothetical protein                                                                              | 1828.8 | 2155.5 | 1905.4 | 2377.5 | 2315.1 | 2785.1 | 1.27 | 1.5E-01 |
| B035DRAFT_03972 | hypothetical protein                                                                              | 3581.9 | 4168.7 | 3622.1 | 4673.3 | 4729.5 | 5495.4 | 1.31 | 1.1E-01 |
| B035DRAFT_03973 | hypothetical protein                                                                              | 7.0    | 4.4    | 3.4    | 2.9    | 3.8    | 3.8    | 0.74 | 4.6E-01 |
| B035DRAFT_03974 | hypothetical protein                                                                              | 11.9   | 13.0   | 11.7   | 7.6    | 9.8    | 15.3   | 0.85 | 6.7E-01 |
| B035DRAFT_03975 | Relaxase/Mobilisation nuclease domain.                                                            | 11.2   | 10.3   | 9.1    | 11.0   | 11.6   | 11.8   | 1.13 | 3.2E-01 |
| B035DRAFT_03976 | hypothetical protein                                                                              | 12.2   | 10.9   | 6.5    | 4.3    | 11.5   | 4.1    | 0.62 | 4.9E-01 |
| B035DRAFT_03977 | Protein of unknown function (DUF3408).                                                            | 41.9   | 30.3   | 27.4   | 40.8   | 40.5   | 24.9   | 1.06 | 8.9E-01 |
| B035DRAFT_03978 | hypothetical protein                                                                              | 24.1   | 15.5   | 17.4   | 28.6   | 17.6   | 12.1   | 0.98 | 9.7E-01 |
| B035DRAFT_03979 | ( rRNA )                                                                                          | 6.5    | 11.9   | 7.7    | 4.1    | 7.9    | 9.3    |      | 6.9E-01 |
| B035DRAFT_03980 | Threonine dehydrogenase and related Zn-dependent dehydrogenases                                   | 33.1   | 38.2   | 29.8   | 31.0   | 43.9   | 36.2   | 1.09 | 6.9E-01 |
| B035DRAFT_03981 | rRNA methylases                                                                                   | 81.1   | 69.5   | 83.6   | 91.7   | 95.1   | 75.6   | 1.12 | 5.0E-01 |
| B035DRAFT_03982 | Viral (Superfamily 1) RNA helicase.                                                               | 58.4   | 62.5   | 56.4   | 52.6   | 56.0   | 74.7   | 1.02 | 9.2E-01 |
| B035DRAFT_03983 | Small-conductance mechanosensitive channel                                                        | 246.6  | 269.9  | 285.5  | 265.0  | 204.2  | 288.5  | 0.94 | 7.6E-01 |
| B035DRAFT_03984 | hypothetical protein                                                                              | 73.5   | 101.8  | 118.0  | 110.3  | 102.1  | 164.9  | 1.28 | 5.0E-01 |
| B035DRAFT_03985 | hypothetical protein                                                                              | 217.2  | 327.3  | 282.5  | 382.3  | 304.2  | 439.7  | 1.37 | 3.1E-01 |
| B035DRAFT_03986 | Bacteroides conjugation system ATPase, TraG family                                                | 1.4    | 1.4    | 1.1    | 0.5    | 1.4    | 0.7    | 0.59 | 3.9E-01 |
| B035DRAFT_03987 | hypothetical protein                                                                              | 0.0    | 0.5    | 0.6    | 0.5    | 1.2    | 0.4    | 1.16 | 8.3E-01 |
| B035DRAFT_03988 | hypothetical protein                                                                              | 0.7    | 0.9    | 0.9    | 0.8    | 0.7    | 0.7    | 0.85 | 2.8E-01 |
| B035DRAFT_03989 | hypothetical protein                                                                              | 3.5    | 3.6    | 4.9    | 3.3    | 3.7    | 4.0    | 0.92 | 6.9E-01 |
| B035DRAFT_03990 | hypothetical protein                                                                              | 14.3   | 13.8   | 20.9   | 11.2   | 10.7   | 5.2    | 0.53 | 2.6E-01 |
| B035DRAFT_03991 | Relaxase/Mobilisation nuclease domain.                                                            | 17.4   | 19.3   | 17.3   | 9.8    | 11.3   | 12.1   | 0.61 | 3.3E-02 |
| B035DRAFT_03992 | hypothetical protein                                                                              | 18.6   | 11.6   | 17.7   | 11.0   | 7.8    | 8.9    | 0.58 | 1.6E-01 |

|                 |                                              |        |        |        |        |        |        |      |         |
|-----------------|----------------------------------------------|--------|--------|--------|--------|--------|--------|------|---------|
| B035DRAFT_03993 | hypothetical protein                         | 131.0  | 69.7   | 92.4   | 103.1  | 114.3  | 123.5  | 1.20 | 6.0E-01 |
| B035DRAFT_03994 | Retron-type reverse transcriptase            | 262.5  | 178.0  | 236.9  | 204.0  | 254.0  | 328.0  | 1.15 | 6.6E-01 |
| B035DRAFT_03995 | hypothetical protein                         | 0.0    | 0.0    | 0.0    | 0.0    | 0.0    | 0.0    | 0.00 |         |
| B035DRAFT_03996 | ( miscRNA )                                  | 0.0    | 0.0    | 0.0    | 0.0    | 0.0    | 0.0    | 0.00 |         |
| B035DRAFT_03997 | hypothetical protein                         | 1.5    | 2.1    | 1.5    | 2.3    | 2.8    | 2.5    | 1.48 | 1.6E-01 |
| B035DRAFT_03998 | Site-specific recombinase XerD               | 2.1    | 2.9    | 2.8    | 3.0    | 4.3    | 2.9    | 1.30 | 3.8E-01 |
| B035DRAFT_03999 | Site-specific recombinase XerD               | 1.8    | 2.3    | 2.6    | 2.1    | 3.5    | 3.5    | 1.32 | 4.4E-01 |
| B035DRAFT_04000 | hypothetical protein                         | 2773.3 | 2787.9 | 2735.1 | 2866.9 | 2781.2 | 2519.2 | 0.98 | 8.2E-01 |
| B035DRAFT_04001 | IS66 Orf2 like protein.                      | 1687.8 | 1661.4 | 1634.3 | 1455.6 | 1649.3 | 1785.3 | 0.98 | 8.5E-01 |
| B035DRAFT_04002 | Transposase IS66 family                      | 2901.8 | 2502.2 | 2552.7 | 2626.1 | 2730.7 | 2095.6 | 0.93 | 6.8E-01 |
| B035DRAFT_04003 | Protein of unknown function (DUF1016).       | 17.2   | 17.6   | 15.0   | 13.7   | 14.9   | 10.0   | 0.77 | 3.0E-01 |
| B035DRAFT_04004 | Uncharacterized conserved protein            | 13.0   | 12.9   | 12.4   | 10.8   | 13.0   | 11.1   | 0.90 | 3.8E-01 |
| B035DRAFT_04005 | hypothetical protein                         | 0.0    | 0.0    | 0.0    | 0.0    | 0.0    | 0.0    | 0.00 |         |
| B035DRAFT_04006 | Transposase domain (DUF772).                 | 223.1  | 218.2  | 220.8  | 243.1  | 240.5  | 202.2  | 1.03 | 7.8E-01 |
| B035DRAFT_04007 | UbiA prenyltransferase family                | 70.7   | 78.5   | 76.1   | 64.9   | 64.3   | 73.9   | 0.90 | 3.2E-01 |
| B035DRAFT_04008 | Phosphoserine phosphatase                    | 64.0   | 57.5   | 58.5   | 58.7   | 59.5   | 69.8   | 1.04 | 7.3E-01 |
| B035DRAFT_04009 | Transposase DDE domain.                      | 463.6  | 488.7  | 506.5  | 433.3  | 441.6  | 499.7  | 0.94 | 5.1E-01 |
| B035DRAFT_04010 | hypothetical protein                         | 84.7   | 103.2  | 78.5   | 85.0   | 83.2   | 105.2  | 1.03 | 9.0E-01 |
| B035DRAFT_04011 | hypothetical protein                         | 75.1   | 94.8   | 82.9   | 69.9   | 65.2   | 93.5   | 0.90 | 6.4E-01 |
| B035DRAFT_04012 | FOG: Transposase and inactivated derivatives | 545.7  | 573.9  | 628.7  | 630.3  | 547.0  | 700.6  | 1.07 | 6.5E-01 |
| B035DRAFT_04013 | hypothetical protein                         | 5.6    | 3.5    | 7.1    | 5.1    | 5.5    | 3.6    | 0.89 | 8.1E-01 |
| B035DRAFT_04014 | Lanthionine synthetase C-like protein.       | 28.3   | 45.1   | 43.3   | 41.4   | 36.6   | 68.1   | 1.23 | 6.4E-01 |
| B035DRAFT_04015 | Protein of unknown function (DUF3244).       | 6.4    | 12.2   | 9.7    | 4.8    | 3.6    | 13.5   | 0.68 | 6.3E-01 |
