# Supplementary material for: Symbiotic Human Gut Bacteria with Variable Metabolic Priorities for Host Mucosal Glycans
Source: PubMed Central journal article supplement — mBio. 2015 Nov 10;6(6):e01282-15. doi: 10.1128/mBio.01282-15 (PMC4659458; doi:10.1128/mbio.01282-15), 2015-11-10
Supplement: mbo006152544st3.pdf [file mbo006152544st3.pdf]

| Table S3. Expression changes in <i>B. fragilis</i> NCTC9343 during growth in neutral porcine mucin O-glycans (PMOG) relative to growth in glucose (Glc) |                                                                                  |        |        |        |        |        |        |             |         |
|---------------------------------------------------------------------------------------------------------------------------------------------------------|----------------------------------------------------------------------------------|--------|--------|--------|--------|--------|--------|-------------|---------|
| Formatting descriptions and notes:                                                                                                                      |                                                                                  |        |        |        |        |        |        |             |         |
| Color-coding for PUL genes that are upregulated more than 10-fold in PMOG relative to Glc                                                               |                                                                                  |        |        |        |        |        |        |             |         |
| Color-coding for genes associated with upregulated PULs that are not themselves upregulated more than 10-fold in PMOG relative to Glc                   |                                                                                  |        |        |        |        |        |        |             |         |
| <i>B. fragilis</i> starch utilization PUL genes                                                                                                         |                                                                                  |        |        |        |        |        |        |             |         |
| <i>B. fragilis</i> inulin utilization PUL genes                                                                                                         |                                                                                  |        |        |        |        |        |        |             |         |
| <i>B. fragilis</i> PULs containing validated recombinational shufflons that were not probed                                                             |                                                                                  |        |        |        |        |        |        |             |         |
| Other putative PULs (minimum <i>susC</i> -/ <i>susD</i> -like gene pair) that are not regulated in response to PMOG                                     |                                                                                  |        |        |        |        |        |        |             |         |
| PUL genes in bold text represent <i>susC</i> homologs probed by qPCR during growth in starch and PMOG mixtures                                          |                                                                                  |        |        |        |        |        |        |             |         |
| <sup>1</sup> Values shown are RPKM normalized counts                                                                                                    |                                                                                  |        |        |        |        |        |        |             |         |
| Total mapped reads : 5,582,206 5,294,358 5,109,030 4,867,823 5,937,185 5,830,264                                                                        |                                                                                  |        |        |        |        |        |        |             |         |
| Locus tag/gene name                                                                                                                                     | Description                                                                      | Glc1   | Glc2   | Glc3   | PMOG1  | PMOG2  | PMOG3  | Fold change | P value |
| BF0001                                                                                                                                                  | putative SpoU rRNA methylase family protein                                      | 72.5   | 75.7   | 67.7   | 71.3   | 72.4   | 61.9   | 0.95        | 5.1E-01 |
| BF0002                                                                                                                                                  | putative outer membrane protein                                                  | 169.4  | 141.2  | 172.4  | 194.2  | 244.6  | 175.7  | 1.27        | 1.6E-01 |
| BF0003                                                                                                                                                  | hypothetical protein                                                             | 38.7   | 37.7   | 44.8   | 103.4  | 118.3  | 85.2   | 2.52        | 4.2E-03 |
| BF0004                                                                                                                                                  | putative sugar transferase                                                       | 32.1   | 37.5   | 37.9   | 106.1  | 116.5  | 93.1   | 2.93        | 1.3E-03 |
| BF0005                                                                                                                                                  | hypothetical protein                                                             | 69.1   | 72.4   | 70.2   | 430.3  | 416.6  | 379.1  | 5.78        | 4.1E-05 |
| BF0006                                                                                                                                                  | hypothetical protein                                                             | 38.4   | 34.8   | 32.3   | 175.1  | 175.1  | 200.4  | 5.22        | 2.3E-04 |
| BF0007                                                                                                                                                  | hypothetical protein                                                             | 28.8   | 25.3   | 31.5   | 106.1  | 118.9  | 94.4   | 3.73        | 9.6E-04 |
| BF0008                                                                                                                                                  | putative glycosyltransferase                                                     | 12.6   | 11.6   | 15.6   | 60.1   | 59.0   | 54.8   | 4.40        | 7.2E-04 |
| BF0009                                                                                                                                                  | putative glycosyltransferase                                                     | 12.7   | 12.6   | 8.7    | 56.2   | 50.7   | 55.2   | 4.83        | 1.4E-03 |
| BF0010                                                                                                                                                  | hypothetical protein                                                             | 11.1   | 6.4    | 12.1   | 43.8   | 51.7   | 36.7   | 4.59        | 7.5E-03 |
| BF0011                                                                                                                                                  | putative ABC transporter ATP-binding protein                                     | 9.5    | 7.3    | 7.4    | 25.3   | 30.1   | 27.7   | 3.45        | 1.4E-03 |
| BF0012                                                                                                                                                  | hypothetical protein                                                             | 50.0   | 42.5   | 47.3   | 29.3   | 38.8   | 29.3   | 0.69        | 4.6E-02 |
| BF0013                                                                                                                                                  | hypothetical protein                                                             | 16.2   | 15.0   | 15.4   | 10.2   | 11.7   | 11.0   | 0.71        | 5.2E-03 |
| BF0014                                                                                                                                                  | putative SAM superfamily protein                                                 | 97.1   | 97.2   | 106.9  | 96.4   | 99.0   | 89.5   | 0.95        | 3.4E-01 |
| BF0015                                                                                                                                                  | hypothetical protein                                                             | 64.7   | 60.4   | 72.4   | 70.8   | 65.7   | 59.4   | 0.99        | 9.4E-01 |
| BF0016                                                                                                                                                  | putative arylsulfatase precursor                                                 | 67.2   | 72.3   | 75.4   | 84.4   | 85.1   | 74.5   | 1.13        | 1.2E-01 |
| BF0017                                                                                                                                                  | conserved hypothetical iron transport-related transmembrane protein              | 899.4  | 901.2  | 944.9  | 609.6  | 627.1  | 502.8  | 0.63        | 8.6E-03 |
| BF0018                                                                                                                                                  | putative iron transport receptor protein                                         | 327.9  | 334.0  | 326.3  | 389.9  | 359.3  | 315.1  | 1.07        | 3.9E-01 |
| BF0019                                                                                                                                                  | putative sulfate permease transmembrane protein                                  | 66.2   | 70.6   | 80.6   | 40.4   | 41.0   | 38.2   | 0.55        | 2.9E-03 |
| rbr                                                                                                                                                     | putative rubrerythrin                                                            | 1055.4 | 1147.2 | 1183.9 | 2702.6 | 3595.0 | 2832.4 | 2.68        | 2.3E-03 |
| nadB                                                                                                                                                    | putative exported L-aspartate oxidase                                            | 149.4  | 148.9  | 151.3  | 183.4  | 174.7  | 186.9  | 1.21        | 3.2E-03 |
| BF0022                                                                                                                                                  | hypothetical protein                                                             | 63.2   | 62.6   | 53.1   | 67.1   | 91.1   | 75.9   | 1.30        | 1.0E-01 |
| pdhD                                                                                                                                                    | putative dihydrolipoamide dehydrogenase                                          | 73.7   | 70.2   | 67.9   | 110.9  | 120.7  | 127.8  | 1.69        | 1.9E-03 |
| dacB                                                                                                                                                    | putative exported D-alanyl-D-alanine carboxypeptidase penicillin-binding protein | 33.4   | 32.7   | 32.0   | 52.1   | 59.0   | 50.9   | 1.65        | 2.2E-03 |
| BF0025                                                                                                                                                  | putative CoA transferase                                                         | 233.5  | 234.9  | 233.9  | 502.7  | 479.7  | 438.5  | 2.02        | 5.7E-04 |
| BF0026                                                                                                                                                  | hypothetical protein                                                             | 127.3  | 128.0  | 112.5  | 181.4  | 211.7  | 148.2  | 1.46        | 5.0E-02 |
| BF0027                                                                                                                                                  | putative SAM/TRAM family methylase protein                                       | 175.2  | 170.5  | 172.9  | 181.5  | 167.0  | 177.9  | 1.01        | 6.8E-01 |
| BF0028                                                                                                                                                  | putative alpha-L-fucosidase protein                                              | 91.9   | 75.1   | 73.0   | 79.6   | 77.9   | 88.5   | 1.03        | 7.9E-01 |

|           |                                                                                      |       |       |       |       |       |       |      |         |
|-----------|--------------------------------------------------------------------------------------|-------|-------|-------|-------|-------|-------|------|---------|
| BF0029    | putative beta-galactosidase                                                          | 15.4  | 12.2  | 16.8  | 33.5  | 27.4  | 28.4  | 2.02 | 1.0E-02 |
| BF0030    | putative AraC family/two component family regulatory protein                         | 0.8   | 1.3   | 1.8   | 1.4   | 1.9   | 0.8   | 1.04 | 9.4E-01 |
| BF0031    | hypothetical protein                                                                 | 19.8  | 13.8  | 13.4  | 17.6  | 19.5  | 12.1  | 1.04 | 8.8E-01 |
| BF0032    | hypothetical protein                                                                 | 52.0  | 48.0  | 61.6  | 65.5  | 70.7  | 64.6  | 1.25 | 7.9E-02 |
| BF0033    | hypothetical protein                                                                 | 69.7  | 60.3  | 79.5  | 59.4  | 72.9  | 58.6  | 0.91 | 5.1E-01 |
| BF0034    | hypothetical protein                                                                 | 7.2   | 5.8   | 12.6  | 9.3   | 25.2  | 5.2   | 1.33 | 6.7E-01 |
| BF0035    | hypothetical protein                                                                 | 100.6 | 104.1 | 112.0 | 155.4 | 161.2 | 125.6 | 1.39 | 3.4E-02 |
| BF0036    | hypothetical protein                                                                 | 12.1  | 11.9  | 23.6  | 32.7  | 23.8  | 26.0  | 1.81 | 1.1E-01 |
| BF0037    | hypothetical protein                                                                 | 3.6   | 2.6   | 3.3   | 13.1  | 12.1  | 10.2  | 3.74 | 2.2E-03 |
| BF0038    | hypothetical protein                                                                 | 0.0   | 3.6   | 4.3   | 11.6  | 11.0  | 9.7   | 2.72 | 7.7E-03 |
| BF0039    | hypothetical protein                                                                 | 1.4   | 4.7   | 0.0   | 12.9  | 10.2  | 12.0  | 4.60 | 1.4E-01 |
| BF0040    | hypothetical protein                                                                 | 15.7  | 14.5  | 13.7  | 18.2  | 19.2  | 18.0  | 1.26 | 1.5E-02 |
| BF0041    | hypothetical protein                                                                 | 16.6  | 12.5  | 18.0  | 15.8  | 18.4  | 25.2  | 1.25 | 3.4E-01 |
| BF0042    | hypothetical protein                                                                 | 92.6  | 97.0  | 124.7 | 164.4 | 165.1 | 132.6 | 1.48 | 5.3E-02 |
| BF0043    | hypothetical protein                                                                 | 25.0  | 25.6  | 21.3  | 74.1  | 84.0  | 73.6  | 3.23 | 6.8E-04 |
| BF0044    | hypothetical protein                                                                 | 2.5   | 3.3   | 5.4   | 13.3  | 18.8  | 12.0  | 4.06 | 1.5E-02 |
| BF0045    | conserved hypothetical lipoprotein                                                   | 5.1   | 7.5   | 6.8   | 12.4  | 12.1  | 11.7  | 1.90 | 1.4E-02 |
| BF0046    | hypothetical protein                                                                 | 91.6  | 99.4  | 90.0  | 54.4  | 47.7  | 47.6  | 0.53 | 1.7E-03 |
| BF0047    | hypothetical protein                                                                 | 58.3  | 66.3  | 59.6  | 28.0  | 34.2  | 25.0  | 0.47 | 5.6E-03 |
| BF0048    | hypothetical protein                                                                 | 29.5  | 22.8  | 25.4  | 15.4  | 16.4  | 13.4  | 0.58 | 1.3E-02 |
| BF0049    | hypothetical protein                                                                 | 8.4   | 8.9   | 5.6   | 4.8   | 5.8   | 3.2   | 0.60 | 1.3E-01 |
| BF0050    | hypothetical protein                                                                 | 39.6  | 30.8  | 34.3  | 27.8  | 34.0  | 29.2  | 0.87 | 2.8E-01 |
| BF0051    | hypothetical protein                                                                 | 49.8  | 37.7  | 44.8  | 36.4  | 34.0  | 37.6  | 0.82 | 1.3E-01 |
| BF0052    | hypothetical protein                                                                 | 60.1  | 60.4  | 57.1  | 36.6  | 34.8  | 33.2  | 0.59 | 7.2E-04 |
| BF0053    | hypothetical protein                                                                 | 51.1  | 51.9  | 55.1  | 28.8  | 29.8  | 21.2  | 0.50 | 9.3E-03 |
| BF0055    | hypothetical protein                                                                 | 13.8  | 12.2  | 12.6  | 9.4   | 11.9  | 9.2   | 0.79 | 8.7E-02 |
| BF0056    | hypothetical protein                                                                 | 21.4  | 14.2  | 22.1  | 13.9  | 13.9  | 16.7  | 0.78 | 2.5E-01 |
| BF0057    | hypothetical protein                                                                 | 16.1  | 19.4  | 14.7  | 12.6  | 6.5   | 12.1  | 0.60 | 1.4E-01 |
| BF0058    | hypothetical protein                                                                 | 11.9  | 11.1  | 11.5  | 5.2   | 7.8   | 7.2   | 0.58 | 2.5E-02 |
| BF0059    | putative lipoprotein                                                                 | 8.7   | 5.6   | 6.7   | 3.8   | 2.3   | 3.5   | 0.46 | 3.4E-02 |
| BF0060    | hypothetical protein                                                                 | 9.6   | 6.2   | 5.8   | 5.5   | 7.3   | 8.3   | 0.99 | 9.6E-01 |
| BF0061    | hypothetical protein                                                                 | 11.7  | 8.3   | 10.3  | 6.2   | 7.0   | 7.4   | 0.68 | 4.9E-02 |
| BF0062    | hypothetical protein                                                                 | 7.7   | 10.4  | 11.5  | 7.5   | 7.1   | 2.9   | 0.56 | 2.0E-01 |
| BF0063    | hypothetical protein                                                                 | 5.1   | 3.1   | 3.3   | 1.7   | 2.7   | 3.8   | 0.69 | 3.3E-01 |
| BF0064    | hypothetical protein                                                                 | 102.0 | 112.6 | 70.5  | 100.3 | 74.1  | 196.9 | 1.22 | 6.4E-01 |
| BF0065    | hypothetical protein                                                                 | 382.1 | 379.6 | 297.6 | 338.8 | 287.5 | 414.3 | 0.98 | 9.0E-01 |
| ftsX      | putative cell division protein                                                       | 174.5 | 137.9 | 162.6 | 102.2 | 99.6  | 104.0 | 0.65 | 9.9E-03 |
| BF0067    | hypothetical protein                                                                 | 260.2 | 186.1 | 213.4 | 215.8 | 234.8 | 232.9 | 1.05 | 7.4E-01 |
| BF0068    | putative undecaprenol kinase                                                         | 280.2 | 208.3 | 257.6 | 245.7 | 268.8 | 273.0 | 1.06 | 6.2E-01 |
| BF0069    | putative tRNA pseudouridine synthase                                                 | 163.9 | 132.9 | 124.6 | 160.8 | 145.2 | 189.8 | 1.18 | 2.9E-01 |
| BF0070    | putative S-adenosylmethionine:tRNA ribosyltransferase-isomerase                      | 502.5 | 433.3 | 499.1 | 516.6 | 558.1 | 516.1 | 1.11 | 1.8E-01 |
| BF0071    | putative 2-amino-4-hydroxy-6-hydroxymethylidihydropteridine pyrophosphokinase (HPPK) | 223.0 | 225.9 | 222.1 | 214.7 | 213.6 | 240.4 | 0.99 | 9.2E-01 |
| SAM_alpha | RF00521                                                                              | 214.1 | 230.2 | 277.2 | 178.4 | 209.7 | 209.9 | 0.83 | 1.7E-01 |
| metK      | S-adenosylmethionine synthetase                                                      | 446.2 | 443.7 | 476.2 | 281.7 | 281.7 | 319.4 | 0.65 | 3.3E-03 |
| BF0073    | putative lysine decarboxylase                                                        | 128.9 | 100.9 | 98.3  | 72.0  | 66.0  | 104.9 | 0.73 | 1.9E-01 |
| BF0074    | hypothetical protein                                                                 | 94.3  | 89.7  | 98.0  | 75.9  | 76.9  | 79.6  | 0.82 | 8.3E-03 |
| BF0075    | possible uroporphyrinogen-III synthase                                               | 911.8 | 915.5 | 984.7 | 868.8 | 887.7 | 825.5 | 0.92 | 9.7E-02 |

|        |                                                                  |       |       |       |       |       |       |      |         |
|--------|------------------------------------------------------------------|-------|-------|-------|-------|-------|-------|------|---------|
| mpA    | ribonuclease P                                                   | 199.9 | 203.9 | 248.9 | 162.6 | 182.2 | 171.4 | 0.79 | 6.9E-02 |
| BF0077 | hypothetical protein                                             | 144.7 | 126.8 | 146.2 | 88.1  | 81.9  | 111.3 | 0.67 | 3.5E-02 |
| BF0078 | putative tatD-related DNase protein                              | 86.3  | 91.5  | 89.2  | 46.5  | 50.1  | 54.3  | 0.56 | 1.6E-03 |
| tyrS   | putative tyrosyl-tRNA synthetase 1                               | 559.0 | 527.2 | 591.2 | 634.4 | 700.7 | 702.6 | 1.21 | 3.0E-02 |
| BF0080 | putative peptidase/protease family protein                       | 45.0  | 41.6  | 42.6  | 55.3  | 54.6  | 50.7  | 1.24 | 1.0E-02 |
| BFt01  | tRNA-Gln-TTG                                                     | 77.0  | 95.2  | 98.5  | 49.5  | 43.2  | 107.3 | 0.68 | 3.3E-01 |
| BF0081 | putative choline-sulfatase                                       | 34.2  | 39.4  | 34.0  | 73.4  | 77.6  | 77.8  | 2.13 | 9.1E-04 |
| BF0082 | putative 4-deoxy-L-threo-5-hexosulose-uronate ketol-isomerase    | 22.2  | 21.2  | 16.8  | 19.6  | 31.5  | 34.5  | 1.39 | 2.2E-01 |
| gno    | gluconate 5-dehydrogenase                                        | 26.5  | 26.8  | 27.2  | 50.5  | 45.9  | 69.0  | 2.02 | 1.2E-02 |
| BF0084 | hypothetical protein                                             | 22.7  | 25.0  | 24.8  | 45.5  | 41.2  | 65.1  | 2.05 | 1.7E-02 |
| BF0085 | putative iron-sulfur cluster-binding protein                     | 34.5  | 32.5  | 33.0  | 32.7  | 25.3  | 29.3  | 0.87 | 2.0E-01 |
| BF0086 | putative polysaccharide deacetylase                              | 321.1 | 365.3 | 316.6 | 286.1 | 241.8 | 279.4 | 0.80 | 6.1E-02 |
| BF0087 | hypothetical protein                                             | 362.3 | 425.1 | 305.9 | 301.8 | 256.4 | 299.8 | 0.79 | 1.4E-01 |
| BF0088 | hypothetical protein                                             | 17.8  | 19.4  | 19.8  | 5.8   | 4.1   | 7.9   | 0.30 | 9.7E-03 |
| BF0089 | hypothetical protein                                             | 3.6   | 3.7   | 4.1   | 1.4   | 2.0   | 2.1   | 0.48 | 1.6E-02 |
| BF0090 | hypothetical protein                                             | 1.2   | 0.5   | 1.3   | 1.4   | 1.1   | 1.6   | 1.47 | 3.7E-01 |
| BF0091 | putative metal uptake system ABC transporter ATP-binding protein | 96.9  | 113.5 | 72.0  | 88.8  | 66.1  | 124.8 | 0.97 | 9.3E-01 |
| BF0092 | putative metal ABC transporter substrate-binding precursor       | 46.1  | 60.8  | 47.3  | 50.4  | 40.1  | 65.1  | 1.00 | 9.9E-01 |
| BF0093 | hypothetical protein                                             | 97.0  | 91.1  | 75.0  | 79.9  | 63.6  | 100.2 | 0.92 | 6.6E-01 |
| BF0094 | putative transmembrane protein                                   | 78.1  | 94.0  | 69.7  | 90.1  | 69.0  | 95.5  | 1.05 | 7.8E-01 |
| BF0095 | putative transmembrane protein                                   | 172.5 | 179.0 | 161.0 | 131.7 | 120.4 | 144.2 | 0.77 | 2.7E-02 |
| purD   | putative phosphoribosylamine--glycine ligase                     | 257.0 | 251.3 | 213.8 | 236.8 | 205.7 | 293.1 | 1.01 | 9.4E-01 |
| BF0097 | putative exported dipeptidyl peptidase IV                        | 167.7 | 174.1 | 151.8 | 162.6 | 145.2 | 160.3 | 0.95 | 4.6E-01 |
| BF0098 | putative methylase                                               | 202.1 | 238.2 | 199.8 | 229.2 | 206.9 | 224.9 | 1.04 | 6.8E-01 |
| BF0099 | putative serine acetyltransferase                                | 211.5 | 228.6 | 209.0 | 180.2 | 168.4 | 179.4 | 0.81 | 1.2E-02 |
| BF0100 | putative two-component regulator sensor kinase                   | 35.6  | 32.5  | 36.5  | 26.3  | 29.5  | 25.7  | 0.78 | 2.3E-02 |
| BF0101 | putative two-component response regulator                        | 28.7  | 27.1  | 30.3  | 31.0  | 35.9  | 29.8  | 1.12 | 2.2E-01 |
| BF0102 | hypothetical protein                                             | 12.1  | 16.0  | 13.3  | 24.3  | 19.2  | 14.5  | 1.38 | 1.9E-01 |
| BF0103 | hypothetical protein                                             | 33.4  | 31.8  | 32.9  | 22.4  | 17.5  | 15.0  | 0.55 | 1.7E-02 |
| polA   | putative DNA polymerase I                                        | 201.7 | 207.5 | 199.7 | 170.2 | 175.6 | 148.7 | 0.81 | 3.2E-02 |
| BF0105 | putative octaprenyl-diphosphate synthase                         | 272.2 | 267.6 | 253.1 | 264.1 | 263.0 | 256.6 | 0.99 | 7.2E-01 |
| BF0106 | hypothetical protein                                             | 88.0  | 74.2  | 84.0  | 31.2  | 41.3  | 45.4  | 0.47 | 1.1E-02 |
| BF0107 | hypothetical protein                                             | 94.3  | 97.1  | 105.0 | 57.7  | 52.8  | 68.1  | 0.60 | 9.3E-03 |
| BF0108 | putative deoxyribose-phosphate aldolase                          | 297.0 | 293.4 | 323.8 | 377.9 | 376.5 | 375.5 | 1.24 | 7.4E-03 |
| BF0109 | hypothetical protein                                             | 246.2 | 160.6 | 221.8 | 220.0 | 204.9 | 214.2 | 1.03 | 8.5E-01 |
| dtd    | D-tyrosyl-tRNA deacylase                                         | 268.8 | 234.9 | 241.1 | 226.7 | 223.2 | 208.5 | 0.89 | 1.0E-01 |
| uvrC   | putative excinuclease UvrC protein                               | 83.8  | 71.3  | 77.0  | 106.2 | 98.8  | 89.7  | 1.27 | 4.5E-02 |
| apt    | adenine phosphoribosyltransferase                                | 184.7 | 176.5 | 174.0 | 240.7 | 252.6 | 245.9 | 1.38 | 9.6E-04 |
| gidA   | glucose-inhibited division protein A                             | 84.8  | 81.5  | 81.3  | 83.8  | 76.1  | 74.9  | 0.95 | 2.9E-01 |
| BF0114 | putative lipoprotein                                             | 35.0  | 30.2  | 35.3  | 26.4  | 31.0  | 25.8  | 0.83 | 1.1E-01 |

|        |                                                                   |       |       |       |       |       |       |      |         |
|--------|-------------------------------------------------------------------|-------|-------|-------|-------|-------|-------|------|---------|
| BF0115 | hypothetical protein                                              | 25.6  | 15.0  | 24.9  | 11.4  | 8.7   | 11.1  | 0.49 | 4.0E-02 |
| BF0116 | hypothetical protein                                              | 25.4  | 24.7  | 28.7  | 15.2  | 20.5  | 15.9  | 0.65 | 3.0E-02 |
| BF0117 | hypothetical protein                                              | 88.5  | 79.3  | 81.6  | 72.4  | 90.1  | 64.0  | 0.90 | 4.5E-01 |
| BF0118 | hypothetical protein                                              | 345.8 | 331.1 | 336.8 | 227.0 | 245.1 | 207.2 | 0.67 | 4.8E-03 |
| BF0119 | hypothetical protein                                              | 0.0   | 0.0   | 0.0   | 0.0   | 0.0   | 0.0   |      |         |
| BF0120 | hypothetical protein                                              | 76.6  | 72.7  | 78.9  | 71.1  | 74.3  | 66.0  | 0.93 | 2.0E-01 |
| BF0121 | hypothetical protein                                              | 54.4  | 53.4  | 58.6  | 61.4  | 74.8  | 63.9  | 1.20 | 8.5E-02 |
| BF0122 | hypothetical protein                                              | 10.5  | 5.6   | 4.3   | 6.2   | 9.1   | 22.6  | 1.72 | 3.8E-01 |
| BF0123 | hypothetical protein                                              | 11.1  | 10.6  | 8.2   | 3.4   | 4.2   | 4.6   | 0.40 | 6.8E-03 |
| BF0124 | hypothetical protein                                              | 83.3  | 104.3 | 75.6  | 52.6  | 62.4  | 48.6  | 0.62 | 3.5E-02 |
| BF0125 | putative transmembrane spore maturation-like protein              | 39.5  | 37.4  | 38.0  | 27.4  | 28.7  | 29.2  | 0.74 | 1.6E-03 |
| BF0126 | hypothetical protein                                              | 40.1  | 22.3  | 23.6  | 39.2  | 38.0  | 49.4  | 1.52 | 1.6E-01 |
| BF0127 | hypothetical protein                                              | 16.4  | 23.3  | 9.0   | 18.2  | 34.8  | 30.2  | 1.77 | 2.3E-01 |
| ruvB   | Holliday junction DNA helicase RuvB                               | 126.7 | 130.1 | 108.2 | 110.0 | 87.8  | 130.5 | 0.89 | 4.9E-01 |
| BF0129 | possible polysaccharide biosynthesis transmembrane protein        | 146.0 | 152.7 | 153.6 | 120.8 | 118.9 | 120.1 | 0.80 | 1.1E-03 |
| BF0130 | hypothetical protein                                              | 102.0 | 95.8  | 99.9  | 84.4  | 85.7  | 97.9  | 0.90 | 1.5E-01 |
| BF0131 | hypothetical protein                                              | 165.1 | 168.3 | 152.2 | 133.2 | 120.7 | 138.2 | 0.81 | 2.8E-02 |
| BF0132 | putative transmembrane protein                                    | 52.3  | 58.4  | 51.5  | 43.4  | 37.8  | 39.2  | 0.74 | 1.6E-02 |
| BF0133 | hypothetical protein                                              | 7.6   | 13.9  | 8.3   | 1.6   | 1.9   | 3.2   | 0.23 | 1.5E-02 |
| BF0134 | putative RNA helicase dead-box protein                            | 245.1 | 243.3 | 228.0 | 130.0 | 91.3  | 152.7 | 0.51 | 2.6E-02 |
| BF0135 | hypothetical protein                                              | 316.6 | 331.1 | 274.5 | 301.9 | 323.3 | 289.7 | 0.99 | 9.5E-01 |
| frk    | putative fructokinase                                             | 128.2 | 122.7 | 132.9 | 202.5 | 176.3 | 175.2 | 1.44 | 7.0E-03 |
| BF0137 | putative sugar isomerase SIS-domain protein                       | 170.3 | 162.6 | 156.5 | 289.8 | 245.4 | 268.7 | 1.64 | 3.3E-03 |
| BF0138 | putative lysine decarboxylase                                     | 168.5 | 169.7 | 131.0 | 220.5 | 185.4 | 236.2 | 1.37 | 7.8E-02 |
| BF0139 | putative peptidase                                                | 71.7  | 78.9  | 69.4  | 71.8  | 71.4  | 57.5  | 0.91 | 3.8E-01 |
| BF0140 | hypothetical protein                                              | 289.5 | 292.9 | 246.5 | 125.8 | 113.5 | 138.2 | 0.46 | 2.7E-03 |
| BF0141 | possible acetyltransferase protein                                | 482.8 | 448.5 | 414.6 | 373.2 | 379.7 | 318.8 | 0.80 | 5.6E-02 |
| uxuA   | mannonate dehydratase                                             | 37.9  | 42.4  | 43.2  | 55.9  | 55.6  | 56.7  | 1.36 | 5.7E-03 |
| uxuB   | D-mannonate oxidoreductase                                        | 48.0  | 58.2  | 46.4  | 45.9  | 44.2  | 66.8  | 1.02 | 9.4E-01 |
| BF0144 | hypothetical protein                                              | 33.1  | 26.8  | 31.6  | 40.7  | 32.9  | 39.1  | 1.23 | 1.3E-01 |
| BF0145 | putative exported signal peptidase I                              | 132.0 | 119.5 | 129.3 | 131.7 | 132.7 | 125.3 | 1.02 | 6.1E-01 |
| BF0146 | possible signal peptidase                                         | 263.9 | 277.7 | 254.9 | 233.1 | 241.8 | 219.8 | 0.87 | 4.1E-02 |
| BF0147 | putative dihydrodipicolinate reductase                            | 296.5 | 282.2 | 266.0 | 260.1 | 243.0 | 235.5 | 0.87 | 6.2E-02 |
| BF0148 | hypothetical protein                                              | 40.7  | 47.8  | 44.3  | 49.7  | 51.4  | 57.9  | 1.20 | 8.3E-02 |
| BF0149 | hypothetical protein                                              | 121.1 | 99.7  | 97.0  | 228.9 | 194.8 | 224.8 | 2.05 | 4.4E-03 |
| BF0150 | hypothetical protein                                              | 62.0  | 61.4  | 65.4  | 92.0  | 75.1  | 88.9  | 1.35 | 2.2E-02 |
| BF0151 | conserved hypothetical outer membrane protein                     | 83.8  | 80.4  | 85.9  | 83.7  | 79.1  | 84.3  | 0.99 | 7.4E-01 |
| BF0152 | hypothetical protein                                              | 293.0 | 308.1 | 289.9 | 414.2 | 382.8 | 396.6 | 1.34 | 2.7E-03 |
| BF0153 | UDP-N-acetylglucosamine acyltransferase                           | 181.0 | 170.6 | 155.7 | 253.8 | 257.8 | 227.5 | 1.46 | 8.9E-03 |
| BF0154 | putative outer membrane lipoprotein                               | 141.0 | 140.0 | 127.2 | 174.0 | 156.3 | 156.3 | 1.19 | 4.3E-02 |
| BF0155 | putative AcrB/AcrD family RND transport protein                   | 101.9 | 104.2 | 86.4  | 128.4 | 125.0 | 119.1 | 1.28 | 3.5E-02 |
| BF0156 | putative AcrA/AcrE RND transport or HlyD secretion family protein | 65.8  | 59.2  | 55.7  | 100.8 | 90.9  | 88.4  | 1.55 | 7.0E-03 |
| BF0157 | putative exported beta-galactosidase                              | 66.7  | 61.8  | 52.3  | 177.6 | 167.2 | 155.5 | 2.78 | 1.4E-03 |

|        |                                                                              |        |        |        |        |        |        |      |         |
|--------|------------------------------------------------------------------------------|--------|--------|--------|--------|--------|--------|------|---------|
| BF0158 | hypothetical protein                                                         | 304.7  | 313.8  | 280.1  | 206.4  | 203.0  | 189.7  | 0.67 | 3.0E-03 |
| BF0159 | hypothetical protein                                                         | 302.3  | 312.8  | 275.0  | 202.7  | 175.1  | 213.7  | 0.66 | 1.2E-02 |
| BF0160 | putative phenylacetic acid degradation protein                               | 143.3  | 171.5  | 141.5  | 108.2  | 104.4  | 128.7  | 0.75 | 5.6E-02 |
| cysS   | cysteinyl-tRNA synthetase                                                    | 449.5  | 463.6  | 446.7  | 479.0  | 437.5  | 470.3  | 1.02 | 6.3E-01 |
| BF0163 | putative haloacid dehalogenase-like hydrolase                                | 21.1   | 28.0   | 22.5   | 36.8   | 28.8   | 35.0   | 1.41 | 6.8E-02 |
| BF0164 | putative two-component system, response regulator protein                    | 12.2   | 9.4    | 12.9   | 17.8   | 18.1   | 13.5   | 1.43 | 9.3E-02 |
| BF0165 | putative two-component regulatory system, sensor kinase protein              | 18.9   | 18.2   | 22.0   | 11.7   | 12.8   | 9.9    | 0.58 | 1.3E-02 |
| BF0166 | hypothetical protein                                                         | 10.0   | 6.7    | 5.0    | 9.4    | 7.3    | 1.7    | 0.71 | 6.4E-01 |
| BF0167 | hypothetical Kelch-like protein                                              | 3.0    | 3.4    | 4.4    | 2.0    | 1.4    | 1.6    | 0.46 | 1.5E-02 |
| BF0168 | putative two-component response regulator transcriptional regulatory protein | 82.2   | 85.0   | 65.3   | 69.9   | 59.5   | 71.7   | 0.87 | 3.0E-01 |
| BF0169 | putative two-component regulator sensor kinase                               | 49.9   | 44.0   | 52.3   | 38.4   | 44.5   | 37.5   | 0.82 | 9.3E-02 |
| mgtA   | putative Mg <sup>2+</sup> transport ATPase protein                           | 179.7  | 169.9  | 168.7  | 183.0  | 175.1  | 183.6  | 1.05 | 2.1E-01 |
| BF0171 | hypothetical protein                                                         | 256.7  | 222.4  | 239.4  | 207.7  | 205.4  | 228.5  | 0.89 | 1.5E-01 |
| BF0172 | putative lipoprotein                                                         | 134.7  | 111.7  | 123.4  | 93.9   | 122.4  | 110.5  | 0.88 | 3.2E-01 |
| BF0173 | putative SNF family helicase                                                 | 40.1   | 40.1   | 40.2   | 37.7   | 40.8   | 38.9   | 0.97 | 3.9E-01 |
| BF0174 | putative tRNA (5-methylaminomethyl-2-thiouridylate)-methyltransferase        | 45.0   | 43.4   | 38.0   | 43.1   | 44.2   | 57.7   | 1.14 | 3.5E-01 |
| BF0175 | putative plant auxin-regulated protein                                       | 173.5  | 185.1  | 173.1  | 191.6  | 198.9  | 176.0  | 1.06 | 2.8E-01 |
| pfkA   | 6-phosphofructokinase                                                        | 138.9  | 127.2  | 124.7  | 171.7  | 169.9  | 164.9  | 1.30 | 6.0E-03 |
| BF0177 | putative ribonuclease III                                                    | 95.6   | 100.0  | 106.4  | 140.8  | 128.0  | 140.0  | 1.35 | 7.1E-03 |
| BF0178 | putative 3-oxoacyl-[acyl-carrier-protein] synthase II                        | 2006.1 | 2016.0 | 2182.1 | 5337.8 | 5302.9 | 5035.0 | 2.53 | 1.6E-04 |
| acpP   | putative acyl carrier protein                                                | 4214.0 | 5033.5 | 4895.3 | 7274.4 | 7958.7 | 7745.3 | 1.63 | 4.9E-03 |
| purN   | putative phosphoribosylglycinamide formyltransferase                         | 93.0   | 77.0   | 91.2   | 86.3   | 105.1  | 87.6   | 1.07 | 5.7E-01 |
| pdxB   | erythronate-4-phosphate dehydrogenase                                        | 79.9   | 93.2   | 96.5   | 86.7   | 90.9   | 90.1   | 1.00 | 9.6E-01 |
| BF0182 | hypothetical protein                                                         | 264.8  | 268.1  | 257.7  | 301.4  | 292.9  | 292.5  | 1.12 | 5.6E-03 |
| BF0183 | hypothetical protein                                                         | 119.6  | 123.0  | 147.0  | 188.6  | 171.7  | 181.1  | 1.39 | 2.0E-02 |
| BF0184 | putative lipopolysaccharide 1,2-glucosyltransferase/general stress protein   | 168.7  | 190.7  | 204.5  | 228.3  | 231.1  | 208.3  | 1.19 | 9.3E-02 |
| BF0185 | putative lipopolysaccharide core biosynthesis protein                        | 246.7  | 222.0  | 261.5  | 205.7  | 217.5  | 190.1  | 0.84 | 7.9E-02 |
| BF0186 | putative glycosyltransferase                                                 | 330.5  | 296.7  | 331.1  | 291.8  | 304.4  | 278.5  | 0.91 | 1.6E-01 |
| BF0187 | putative glycosyltransferase                                                 | 257.5  | 225.5  | 231.1  | 200.7  | 190.6  | 166.1  | 0.78 | 4.3E-02 |
| BF0188 | putative transport ATP-binding protein                                       | 253.3  | 219.5  | 245.0  | 151.3  | 163.8  | 157.7  | 0.66 | 4.1E-03 |
| BF0189 | hypothetical protein                                                         | 195.1  | 183.9  | 205.6  | 123.4  | 131.1  | 135.1  | 0.67 | 2.8E-03 |
| rmh1   | putative ribonuclease H1                                                     | 35.9   | 38.7   | 32.4   | 31.9   | 35.0   | 44.1   | 1.03 | 8.4E-01 |
| BF0191 | hypothetical protein                                                         | 2028.8 | 2467.0 | 2280.7 | 1028.7 | 1040.1 | 1034.5 | 0.46 | 1.1E-03 |
| BF0192 | putative shikimate kinase                                                    | 87.2   | 76.8   | 68.4   | 53.0   | 48.0   | 54.9   | 0.67 | 1.9E-02 |
| BF0193 | hypothetical protein                                                         | 92.6   | 80.7   | 77.0   | 54.2   | 63.8   | 73.5   | 0.76 | 9.4E-02 |
| BF0194 | putative heat-shock protein                                                  | 64.2   | 59.5   | 60.8   | 60.1   | 62.8   | 66.2   | 1.02 | 6.1E-01 |

|        |                                                             |        |        |        |        |        |        |       |         |
|--------|-------------------------------------------------------------|--------|--------|--------|--------|--------|--------|-------|---------|
| BF0195 | hypothetical protein                                        | 52.1   | 54.6   | 55.1   | 65.7   | 78.7   | 61.6   | 1.27  | 6.1E-02 |
| BF0196 | arginine decarboxylase                                      | 213.6  | 194.3  | 208.6  | 247.2  | 251.7  | 242.5  | 1.20  | 1.0E-02 |
| BF0197 | putative acetylglutamate kinase                             | 85.1   | 83.1   | 81.6   | 98.7   | 95.9   | 98.4   | 1.17  | 2.3E-03 |
| BF0198 | putative extracytoplasmic function alternative sigma factor | 1695.7 | 1688.1 | 1629.1 | 1370.0 | 1273.0 | 1404.0 | 0.81  | 7.8E-03 |
| BF0199 | hypothetical protein                                        | 869.5  | 818.8  | 891.5  | 691.6  | 788.7  | 761.7  | 0.87  | 6.7E-02 |
| BF0200 | hypothetical protein                                        | 773.9  | 770.0  | 809.4  | 467.4  | 538.3  | 525.9  | 0.65  | 3.2E-03 |
| BF0201 | putative lipoprotein                                        | 364.4  | 349.6  | 352.0  | 159.7  | 199.1  | 151.0  | 0.47  | 3.8E-03 |
| BF0202 | putative lipoprotein                                        | 508.0  | 399.4  | 415.3  | 173.8  | 192.9  | 170.9  | 0.41  | 2.1E-03 |
| BF0203 | hypothetical protein                                        | 103.2  | 92.6   | 103.7  | 100.5  | 125.1  | 131.3  | 1.18  | 1.9E-01 |
| BF0204 | putative transmembrane protein                              | 145.1  | 116.7  | 146.1  | 193.6  | 210.9  | 169.3  | 1.41  | 4.6E-02 |
| BF0205 | putative transmembrane protein                              | 39.6   | 35.5   | 46.6   | 27.9   | 39.1   | 36.5   | 0.85  | 3.4E-01 |
| BF0206 | hypothetical protein                                        | 7.7    | 10.7   | 12.8   | 8.1    | 9.9    | 13.4   | 1.00  | 1.0E+00 |
| BF0207 | hypothetical protein                                        | 15.9   | 22.5   | 21.1   | 16.3   | 20.7   | 15.2   | 0.88  | 4.9E-01 |
| BF0208 | hypothetical protein                                        | 13.0   | 11.9   | 15.8   | 6.7    | 4.8    | 5.8    | 0.42  | 7.8E-03 |
| BF0209 | hypothetical protein                                        | 10.4   | 9.6    | 10.3   | 5.1    | 5.8    | 4.8    | 0.52  | 2.1E-03 |
| fucR   | putative GntR-family regulatory protein                     | 315.1  | 282.2  | 280.5  | 801.4  | 985.0  | 757.3  | 2.88  | 1.6E-03 |
| fucI   | putative L-fucose isomerase                                 | 43.7   | 40.5   | 42.2   | 936.5  | 972.4  | 1052.9 | 23.41 | 5.0E-06 |
| fucO   | putative lactaldehyde reductase                             | 41.4   | 43.9   | 46.1   | 895.1  | 963.4  | 855.2  | 20.65 | 9.8E-06 |
| fucA   | putative aldolase                                           | 144.4  | 136.0  | 139.6  | 1133.0 | 1269.9 | 1200.8 | 8.57  | 1.6E-05 |
| fucK   | putative fuculokinase                                       | 72.8   | 77.4   | 82.9   | 709.0  | 741.7  | 654.8  | 9.03  | 4.6E-05 |
| fucP   | putative L-fucose permease                                  | 40.3   | 44.5   | 42.4   | 547.8  | 595.1  | 506.7  | 12.95 | 3.2E-05 |
| BF0217 | hypothetical protein                                        | 467.5  | 410.3  | 368.7  | 311.2  | 250.1  | 408.7  | 0.77  | 2.3E-01 |
| BF0218 | transcription elongation factor NusA                        | 1001.6 | 939.3  | 1030.7 | 696.6  | 710.4  | 673.4  | 0.70  | 1.8E-03 |
| infB   | translation initiation factor IF-2                          | 855.2  | 783.2  | 790.3  | 650.6  | 652.1  | 725.9  | 0.83  | 3.3E-02 |
| BF0220 | hypothetical protein                                        | 195.7  | 214.9  | 203.2  | 128.4  | 144.7  | 157.2  | 0.70  | 1.3E-02 |
| BF0221 | putative ABC transporter membrane protein                   | 264.8  | 285.8  | 258.4  | 168.5  | 160.6  | 175.2  | 0.62  | 1.6E-03 |
| BF0222 | hypothetical protein                                        | 138.0  | 133.2  | 135.3  | 75.7   | 86.1   | 83.4   | 0.60  | 1.4E-03 |
| BF0223 | putative ABC transporter, ATP-binding protein               | 262.0  | 266.5  | 257.3  | 185.7  | 187.7  | 185.7  | 0.71  | 1.2E-04 |
| BF0224 | putative ABC transporter protein                            | 368.4  | 384.9  | 380.3  | 225.1  | 238.3  | 201.1  | 0.58  | 2.3E-03 |
| BF0225 | putative aminotransferase                                   | 522.5  | 537.4  | 527.4  | 240.0  | 251.7  | 237.3  | 0.46  | 5.7E-05 |
| BF0226 | hypothetical protein                                        | 431.0  | 445.5  | 346.2  | 136.0  | 122.8  | 122.3  | 0.31  | 1.1E-03 |
| BF0227 | putative exported alpha-galactosidase                       | 15.8   | 16.5   | 14.3   | 6.0    | 7.3    | 4.9    | 0.39  | 5.4E-03 |
| BF0228 | hypothetical protein                                        | 2.5    | 3.3    | 2.7    | 8.9    | 7.8    | 8.3    | 2.95  | 1.4E-03 |
| BF0229 | putative outer membrane protein                             | 9.6    | 11.8   | 10.5   | 14.0   | 12.6   | 14.3   | 1.28  | 4.9E-02 |
| BF0230 | hypothetical protein                                        | 53.5   | 52.6   | 57.4   | 68.4   | 78.9   | 57.7   | 1.24  | 1.2E-01 |
| BF0231 | putative regulatory protein                                 | 132.1  | 114.2  | 125.6  | 72.5   | 77.2   | 79.7   | 0.62  | 3.0E-03 |
| BF0232 | putative ECF-type sigma factor                              | 26.3   | 20.3   | 23.8   | 38.8   | 39.5   | 36.0   | 1.63  | 1.0E-02 |
| BF0233 | putative exported alpha-galactosidase                       | 74.5   | 76.9   | 72.9   | 134.6  | 130.1  | 127.3  | 1.75  | 2.2E-04 |
| BF0234 | putative lipoprotein                                        | 35.9   | 40.6   | 37.5   | 52.1   | 45.6   | 45.8   | 1.26  | 3.1E-02 |
| BF0235 | putative inorganic pyrophosphatase                          | 16.6   | 18.7   | 16.0   | 53.5   | 59.1   | 60.6   | 3.38  | 3.9E-04 |
| BF0237 | hypothetical protein                                        | 2.8    | 3.3    | 3.7    | 7.7    | 6.5    | 7.8    | 2.27  | 4.4E-03 |
| BF0238 | hypothetical protein                                        | 0.0    | 0.9    | 1.8    | 3.9    | 3.8    | 1.6    | 2.27  | 2.4E-01 |
| rmhB   | ribonuclease HII                                            | 61.4   | 58.5   | 49.7   | 61.8   | 49.2   | 73.7   | 1.08  | 6.6E-01 |
| BF0240 | putative cationic transporter                               | 77.7   | 72.3   | 76.5   | 39.3   | 34.4   | 33.6   | 0.47  | 1.0E-03 |
| gpml   | phosphoglyceromutase                                        | 413.6  | 394.6  | 415.2  | 535.5  | 486.9  | 523.9  | 1.26  | 6.7E-03 |
| BF0242 | putative two-component system sensor kinase                 | 181.1  | 177.7  | 166.3  | 142.5  | 157.8  | 159.2  | 0.87  | 6.6E-02 |

|        |                                                                                         |        |        |        |        |        |        |      |         |
|--------|-----------------------------------------------------------------------------------------|--------|--------|--------|--------|--------|--------|------|---------|
| BF0243 | putative two-component sensor histidine kinase                                          | 39.4   | 28.2   | 31.4   | 21.4   | 21.5   | 25.9   | 0.70 | 6.5E-02 |
| BF0244 | hypothetical protein                                                                    | 131.6  | 115.5  | 131.2  | 68.4   | 75.5   | 97.7   | 0.63 | 3.3E-02 |
| BF0245 | hypothetical protein                                                                    | 107.0  | 108.2  | 99.5   | 80.9   | 81.0   | 91.5   | 0.80 | 2.4E-02 |
| BF0246 | DNA gyrase subunit B                                                                    | 508.0  | 565.4  | 550.6  | 568.0  | 503.2  | 533.8  | 0.99 | 8.5E-01 |
| rpsT   | 30S ribosomal protein S20                                                               | 3277.2 | 2897.0 | 3655.2 | 2098.0 | 1981.2 | 2252.4 | 0.65 | 1.2E-02 |
| BFt02  | tRNA-Glu-TTC                                                                            | 138.8  | 127.6  | 139.9  | 285.4  | 337.8  | 451.4  | 2.60 | 7.0E-03 |
| BF0248 | possible DNA repair protein RecO                                                        | 28.8   | 26.5   | 24.5   | 46.3   | 50.7   | 43.9   | 1.77 | 3.4E-03 |
| BF0249 | hypothetical protein                                                                    | 672.9  | 545.1  | 558.3  | 619.9  | 584.3  | 632.7  | 1.04 | 6.8E-01 |
| ftsZ   | cell division protein FtsZ                                                              | 227.6  | 204.9  | 195.0  | 203.6  | 197.0  | 225.1  | 1.00 | 9.8E-01 |
| ftsA   | putative cell division protein                                                          | 245.9  | 227.0  | 214.3  | 209.7  | 207.9  | 213.6  | 0.92 | 1.6E-01 |
| ftsQ   | putative cell division protein                                                          | 158.1  | 142.9  | 150.8  | 124.8  | 135.9  | 129.1  | 0.86 | 3.6E-02 |
| murC   | UDP-N-acetylmuramate--L-alanine ligase                                                  | 259.1  | 277.4  | 263.0  | 215.3  | 214.4  | 202.9  | 0.79 | 4.4E-03 |
| murG   | N-acetylglucosaminyl transferase                                                        | 220.0  | 225.2  | 203.3  | 209.7  | 190.8  | 208.4  | 0.94 | 2.9E-01 |
| ftsW   | putative transmembrane rod-shape determining protein                                    | 195.0  | 236.6  | 216.9  | 172.3  | 181.0  | 173.8  | 0.82 | 4.5E-02 |
| murD   | putative UDP-N-acetylmuramoylalanine-D-glutamate ligase                                 | 257.6  | 251.2  | 241.7  | 212.3  | 205.2  | 191.7  | 0.81 | 1.1E-02 |
| mraY   | putative UDP-N-acetylmuramoyl-pentapeptide:undecaprenyl-phosphate-phosphatase           | 309.5  | 301.3  | 313.4  | 218.2  | 223.3  | 204.2  | 0.70 | 1.4E-03 |
| murE   | UDP-N-acetylmuramoylalanine-D-glutamate--2, 6-diaminopimelate ligase                    | 216.8  | 211.6  | 197.6  | 194.0  | 185.4  | 211.4  | 0.94 | 3.5E-01 |
| ftsI   | putative cell division specific transpeptidase/penicillin-binding protein               | 190.3  | 178.1  | 179.0  | 147.1  | 131.3  | 144.6  | 0.77 | 9.4E-03 |
| BF0260 | hypothetical protein                                                                    | 169.7  | 150.9  | 166.5  | 109.0  | 102.1  | 109.9  | 0.66 | 2.9E-03 |
| mraW   | S-adenosyl-methyltransferase MraW                                                       | 277.3  | 245.1  | 245.9  | 223.5  | 199.8  | 245.9  | 0.87 | 1.8E-01 |
| mraZ   | putative cell division protein                                                          | 193.8  | 185.3  | 159.3  | 132.9  | 115.6  | 170.7  | 0.77 | 1.6E-01 |
| BF0263 | hypothetical protein                                                                    | 64.1   | 58.1   | 56.2   | 38.7   | 44.9   | 46.6   | 0.73 | 2.2E-02 |
| BF0264 | hypothetical protein                                                                    | 158.8  | 154.3  | 151.1  | 36.2   | 62.4   | 66.8   | 0.34 | 1.4E-02 |
| sigE   | putative extracytoplasmic function alternative sigma factor                             | 4443.3 | 4152.5 | 4240.2 | 2253.9 | 2659.8 | 2135.5 | 0.55 | 3.8E-03 |
| BF0266 | hypothetical protein                                                                    | 1596.3 | 1657.4 | 1594.8 | 506.1  | 504.2  | 513.8  | 0.31 | 3.9E-06 |
| BF0267 | hypothetical protein                                                                    | 239.1  | 224.5  | 213.9  | 46.5   | 43.8   | 47.0   | 0.20 | 5.0E-05 |
| BF0268 | hypothetical protein                                                                    | 183.1  | 184.7  | 175.4  | 20.9   | 28.4   | 25.5   | 0.14 | 3.2E-04 |
| BF0269 | hypothetical protein                                                                    | 487.3  | 409.8  | 441.5  | 307.1  | 380.4  | 393.3  | 0.80 | 1.2E-01 |
| BF0270 | putative hemolysin A                                                                    | 274.9  | 210.8  | 245.5  | 254.3  | 256.9  | 272.3  | 1.08 | 4.8E-01 |
| dgt    | putative deoxyguanosinetriphosphate triphosphohydrolase                                 | 74.0   | 72.3   | 68.9   | 91.2   | 85.0   | 76.4   | 1.17 | 7.7E-02 |
| dut    | deoxyuridine 5'-triphosphate nucleotidohydrolase                                        | 384.1  | 399.1  | 327.0  | 327.9  | 327.3  | 363.1  | 0.92 | 3.7E-01 |
| BF0273 | hypothetical protein                                                                    | 413.8  | 398.7  | 385.0  | 290.5  | 289.9  | 264.4  | 0.71 | 3.1E-03 |
| BF0274 | putative lipoprotein                                                                    | 359.2  | 369.0  | 352.6  | 266.5  | 253.6  | 269.2  | 0.73 | 1.0E-03 |
| BF0275 | putative exported peptidase                                                             | 136.2  | 118.3  | 110.9  | 82.3   | 77.6   | 97.4   | 0.70 | 3.6E-02 |
| BF0276 | putative two-component system sensor histidine kinase/response regulator fusion protein | 79.8   | 75.0   | 77.8   | 82.1   | 83.8   | 84.2   | 1.08 | 3.9E-02 |
| BF0277 | hypothetical protein                                                                    | 96.5   | 97.6   | 99.2   | 154.0  | 153.6  | 153.1  | 1.57 | 1.9E-05 |

|        |                                                         |       |        |        |       |        |        |      |         |
|--------|---------------------------------------------------------|-------|--------|--------|-------|--------|--------|------|---------|
| BF0278 | putative beta-glucosidase                               | 0.4   | 0.4    | 0.2    | 1.1   | 1.0    | 0.9    | 3.55 | 2.6E-02 |
| BF0279 | putative glycosylhydrolase                              | 2.3   | 2.6    | 0.8    | 5.2   | 3.7    | 4.9    | 2.68 | 9.1E-02 |
| BF0280 | putative exported glycosylhydrolase                     | 1.3   | 1.4    | 1.4    | 4.5   | 3.1    | 2.7    | 2.46 | 1.3E-02 |
| BF0281 | hypothetical protein                                    | 0.9   | 0.6    | 0.6    | 1.3   | 1.7    | 1.7    | 2.42 | 1.6E-02 |
| BF0282 | hypothetical protein                                    | 1.2   | 1.5    | 0.9    | 1.8   | 1.8    | 1.3    | 1.34 | 2.3E-01 |
| BF0283 | putative lipoprotein                                    | 26.9  | 31.2   | 29.5   | 35.4  | 33.0   | 40.4   | 1.24 | 7.1E-02 |
| BF0284 | putative exported glycosylhydrolase                     | 4.9   | 4.3    | 4.5    | 15.3  | 15.3   | 14.3   | 3.28 | 1.5E-04 |
| BF0285 | putative exported glutaminase                           | 4.6   | 5.5    | 4.7    | 15.5  | 15.7   | 15.8   | 3.18 | 4.2E-04 |
| BF0286 | hypothetical protein                                    | 13.8  | 13.5   | 13.9   | 16.7  | 18.0   | 14.3   | 1.19 | 9.9E-02 |
| BF0287 | putative glycosylhydrolase                              | 1.0   | 1.2    | 1.5    | 1.0   | 1.0    | 0.8    | 0.75 | 9.6E-02 |
| BF0288 | putative TonB dependent receptor outer membrane protein | 3.6   | 2.4    | 3.6    | 12.6  | 13.6   | 10.9   | 3.91 | 3.4E-03 |
| BF0289 | putative lipoprotein                                    | 7.6   | 5.7    | 6.4    | 13.4  | 12.7   | 11.6   | 1.93 | 7.0E-03 |
| BF0290 | hypothetical protein                                    | 13.5  | 13.3   | 14.0   | 22.7  | 24.8   | 15.3   | 1.51 | 8.3E-02 |
| BF0291 | hypothetical protein                                    | 7.1   | 4.5    | 4.6    | 3.6   | 10.7   | 3.6    | 0.98 | 9.7E-01 |
| BF0292 | putative exported endo-arabinase                        | 6.1   | 4.8    | 3.8    | 6.8   | 7.9    | 6.4    | 1.46 | 1.1E-01 |
| BF0295 | putative exported glycosylhydrolase                     | 1.6   | 1.0    | 2.4    | 2.7   | 2.9    | 2.0    | 1.59 | 2.4E-01 |
| BF0296 | hypothetical protein                                    | 0.5   | 0.3    | 0.3    | 1.2   | 1.1    | 1.1    | 3.55 | 1.0E-02 |
| BF0297 | putative exported glutaminase                           | 7.2   | 9.3    | 6.7    | 9.6   | 9.0    | 9.8    | 1.24 | 1.5E-01 |
| BF0298 | putative exported alpha-1,2-mannosidase                 | 43.4  | 49.5   | 39.4   | 32.9  | 35.0   | 38.7   | 0.81 | 9.1E-02 |
| BF0299 | hypothetical protein                                    | 60.1  | 62.2   | 57.1   | 80.0  | 73.8   | 68.8   | 1.24 | 2.8E-02 |
| BF0300 | putative aldose 1-epimerase                             | 80.0  | 75.6   | 80.9   | 111.9 | 104.7  | 95.7   | 1.32 | 1.4E-02 |
| BF0301 | putative transmembrane protein                          | 5.5   | 7.1    | 4.6    | 6.4   | 5.9    | 7.5    | 1.16 | 4.2E-01 |
| BF0302 | putative exported carbohydrate-binding protein          | 3.9   | 3.6    | 3.4    | 3.5   | 3.5    | 4.5    | 1.05 | 7.1E-01 |
| BF0303 | putative exported glycosylhydrolase                     | 4.4   | 5.2    | 4.2    | 3.1   | 3.2    | 3.8    | 0.73 | 5.5E-02 |
| BF0305 | hypothetical protein                                    | 1.8   | 1.3    | 0.0    | 1.7   | 0.0    | 0.6    | 0.65 | 6.0E-01 |
| BF0306 | conserved hypothetical lipoprotein                      | 0.5   | 1.8    | 0.5    | 0.3   | 0.4    | 0.2    | 0.34 | 1.4E-01 |
| BF0307 | hypothetical protein                                    | 2.5   | 1.8    | 2.3    | 3.2   | 1.4    | 1.2    | 0.81 | 6.2E-01 |
| BF0309 | hypothetical protein                                    | 1.5   | 0.0    | 1.6    | 2.1   | 0.0    | 0.0    | 1.35 |         |
| BF0310 | hypothetical lipoprotein                                | 26.3  | 23.8   | 26.0   | 36.9  | 35.8   | 31.5   | 1.37 | 1.4E-02 |
| BF0311 | hypothetical protein                                    | 22.7  | 31.3   | 28.0   | 21.5  | 29.4   | 32.1   | 1.01 | 9.7E-01 |
| BF0312 | putative transmembrane acyltransferase protein          | 113.1 | 111.6  | 120.3  | 91.2  | 106.5  | 88.5   | 0.83 | 6.4E-02 |
| BF0313 | putative cAMP-binding DNA-binding protein               | 75.1  | 58.6   | 59.3   | 59.3  | 72.8   | 67.2   | 1.04 | 7.8E-01 |
| BF0314 | hypothetical protein                                    | 461.9 | 467.8  | 474.9  | 287.6 | 332.2  | 271.1  | 0.63 | 5.6E-03 |
| BF0315 | putative transcriptional regulator                      | 62.6  | 63.1   | 53.2   | 71.0  | 79.8   | 72.2   | 1.25 | 5.2E-02 |
| BF0316 | hypothetical protein                                    | 20.8  | 19.6   | 18.1   | 44.2  | 40.8   | 53.8   | 2.36 | 3.0E-03 |
| BF0317 | putative exported carbohydrate-binding protein          | 6.0   | 5.3    | 7.1    | 12.7  | 10.7   | 13.0   | 1.99 | 8.3E-03 |
| BF0318 | putative exported rhamnosidase protein                  | 5.2   | 5.4    | 5.0    | 7.7   | 7.4    | 8.1    | 1.49 | 1.8E-03 |
| BF0319 | putative peptidase/deacetylase                          | 48.8  | 52.7   | 36.4   | 77.6  | 61.6   | 69.0   | 1.52 | 5.8E-02 |
| BF0320 | putative AMP binding long chain acyl-CoA synthetase     | 269.0 | 285.4  | 286.0  | 265.6 | 268.2  | 268.6  | 0.96 | 1.3E-01 |
| BF0321 | putative peptide chain release factor                   | 617.4 | 618.4  | 670.3  | 782.5 | 760.1  | 831.9  | 1.25 | 1.2E-02 |
| BF0322 | hypothetical membrane protein                           | 909.7 | 1067.7 | 1111.1 | 955.1 | 1107.7 | 1364.2 | 1.10 | 5.4E-01 |
| BF0323 | hypothetical protein                                    | 69.8  | 63.3   | 69.8   | 62.5  | 84.0   | 79.1   | 1.10 | 4.3E-01 |
| BF0324 | hypothetical protein                                    | 18.4  | 16.7   | 18.6   | 26.3  | 25.6   | 34.1   | 1.59 | 2.0E-02 |



|        |                                                               |       |       |       |       |       |       |      |         |
|--------|---------------------------------------------------------------|-------|-------|-------|-------|-------|-------|------|---------|
| BF0325 | putative transmembrane protein                                | 115.9 | 123.8 | 116.5 | 75.1  | 83.4  | 80.1  | 0.67 | 2.1E-03 |
| BF0326 | putative TonB-dependent receptor exported protein             | 87.9  | 87.5  | 93.0  | 214.2 | 215.4 | 195.2 | 2.33 | 3.1E-04 |
| BF0327 | hypothetical protein                                          | 4.3   | 5.7   | 6.0   | 29.2  | 27.1  | 27.3  | 5.25 | 7.2E-04 |
| BF0328 | putative beta-galactosidase                                   | 10.9  | 12.0  | 8.4   | 75.4  | 68.8  | 71.2  | 6.95 | 5.8E-04 |
| BF0329 | putative exported beta-hexosaminidase                         | 3.4   | 3.9   | 6.1   | 23.6  | 25.8  | 27.0  | 5.86 | 2.6E-03 |
| BF0330 | hypothetical protein                                          | 7.5   | 7.4   | 8.1   | 36.3  | 40.8  | 34.0  | 4.81 | 2.0E-04 |
| BF0331 | putative exported hydrolase                                   | 7.0   | 8.7   | 9.0   | 35.2  | 32.5  | 28.4  | 3.91 | 1.1E-03 |
| BF0332 | hypothetical protein                                          | 13.2  | 11.2  | 10.8  | 24.9  | 26.6  | 25.2  | 2.18 | 1.6E-03 |
| BF0333 | hypothetical protein                                          | 4.8   | 5.1   | 5.3   | 10.1  | 6.9   | 8.1   | 1.64 | 2.8E-02 |
| BF0334 | hypothetical protein                                          | 2.6   | 1.9   | 2.4   | 10.8  | 9.6   | 11.9  | 4.69 | 1.0E-03 |
| BF0335 | putative two-component system sensor histidine kinase         | 7.2   | 8.2   | 7.5   | 10.2  | 12.3  | 12.4  | 1.52 | 1.2E-02 |
| BF0336 | putative two-component sensor histidine kinase                | 34.4  | 38.8  | 34.4  | 44.8  | 51.6  | 42.7  | 1.29 | 4.1E-02 |
| BF0337 | hypothetical protein                                          | 19.4  | 18.7  | 19.3  | 5.2   | 4.9   | 3.9   | 0.24 | 7.4E-04 |
| BF0338 | hypothetical protein                                          | 41.3  | 49.4  | 38.7  | 15.3  | 12.5  | 16.7  | 0.34 | 3.0E-03 |
| BF0339 | putative exported beta-glucosidase                            | 58.9  | 76.6  | 50.8  | 20.8  | 16.2  | 22.4  | 0.32 | 6.0E-03 |
| BF0340 | hypothetical protein                                          | 62.0  | 65.8  | 53.8  | 23.4  | 16.7  | 23.1  | 0.35 | 4.2E-03 |
| BF0341 | putative TonB-dependent outer membrane exported protein       | 73.2  | 83.6  | 77.0  | 27.7  | 23.8  | 24.8  | 0.33 | 4.7E-04 |
| BF0342 | hypothetical protein                                          | 13.0  | 10.8  | 8.7   | 1.1   | 1.3   | 1.1   | 0.11 | 6.2E-04 |
| BF0343 | putative DNA-binding protein                                  | 148.8 | 152.6 | 154.6 | 42.1  | 45.2  | 53.0  | 0.31 | 5.9E-04 |
| BF0344 | hypothetical protein                                          | 244.6 | 248.9 | 229.1 | 49.3  | 49.5  | 39.8  | 0.19 | 3.3E-04 |
| BF0345 | hypothetical protein                                          | 53.2  | 58.6  | 62.1  | 54.3  | 61.0  | 55.7  | 0.98 | 8.4E-01 |
| BF0346 | hypothetical protein                                          | 11.8  | 6.7   | 9.5   | 5.2   | 3.6   | 9.8   | 0.63 | 3.0E-01 |
| BF0347 | hypothetical protein                                          | 180.0 | 208.0 | 202.6 | 103.4 | 115.8 | 136.5 | 0.60 | 1.3E-02 |
| BFt03  | tRNA-Leu-TAG                                                  | 76.8  | 117.0 | 59.4  | 72.8  | 38.5  | 169.3 | 0.96 | 9.5E-01 |
| BF0349 | putative TonB dependent outer membrane exported protein       | 2.1   | 2.3   | 1.8   | 0.4   | 0.2   | 0.6   | 0.17 | 1.5E-02 |
| BF0350 | putative outer membrane protein                               | 4.4   | 4.7   | 4.0   | 2.9   | 3.4   | 3.3   | 0.74 | 2.0E-02 |
| BF0351 | hypothetical protein                                          | 58.0  | 59.1  | 47.8  | 62.7  | 50.3  | 68.7  | 1.10 | 5.3E-01 |
| BF0352 | hypothetical protein                                          | 116.0 | 126.6 | 114.6 | 113.8 | 106.8 | 111.3 | 0.93 | 1.7E-01 |
| BF0353 | DNA topoisomerase IV subunit A                                | 252.7 | 230.9 | 220.1 | 234.2 | 226.7 | 238.7 | 1.00 | 9.4E-01 |
| glyS   | glycyl-tRNA synthetase                                        | 742.3 | 758.8 | 765.4 | 591.4 | 613.9 | 566.7 | 0.78 | 2.6E-03 |
| BF0355 | putative fkbp-type 22 kDa peptidyl-prolyl cis-trans isomerase | 702.3 | 685.5 | 724.8 | 544.1 | 622.1 | 569.5 | 0.82 | 2.2E-02 |
| BF0356 | hypothetical protein                                          | 29.8  | 30.0  | 32.6  | 19.2  | 21.1  | 22.1  | 0.67 | 5.2E-03 |
| BF0357 | hypothetical protein                                          | 7.9   | 10.8  | 10.2  | 4.4   | 5.9   | 5.3   | 0.54 | 2.1E-02 |
| BF0358 | putative transmembrane protein                                | 7.4   | 6.1   | 6.8   | 8.3   | 10.0  | 6.4   | 1.20 | 3.3E-01 |
| BF0359 | putative nitroimidazole resistance-like protein               | 35.4  | 33.9  | 37.0  | 64.7  | 66.9  | 47.7  | 1.67 | 2.2E-02 |
| BF0360 | putative NapC/NirT cytochrome c-type protein                  | 32.1  | 28.1  | 31.1  | 47.5  | 44.1  | 44.6  | 1.49 | 3.8E-03 |
| nrfA   | putative exported cytochrome c552                             | 25.7  | 18.1  | 21.9  | 31.5  | 27.7  | 39.7  | 1.50 | 8.1E-02 |
| BF0362 | putative transmembrane protein                                | 42.8  | 35.1  | 34.6  | 42.8  | 34.2  | 49.2  | 1.12 | 5.0E-01 |
| BF0363 | putative cytochrome c biogenesis protein                      | 13.6  | 10.7  | 14.0  | 16.3  | 16.0  | 15.0  | 1.24 | 1.1E-01 |
| BF0364 | hypothetical protein                                          | 8.8   | 7.4   | 10.3  | 11.2  | 17.9  | 12.0  | 1.53 | 1.1E-01 |
| BF0365 | putative FNR-family transcriptional regulatory protein        | 129.7 | 124.6 | 120.2 | 100.5 | 106.2 | 95.1  | 0.81 | 1.3E-02 |

|        |                                                                     |       |       |       |       |       |       |      |         |
|--------|---------------------------------------------------------------------|-------|-------|-------|-------|-------|-------|------|---------|
| BF0366 | putative beta-lactamase/acylhydrolase                               | 18.2  | 18.4  | 18.4  | 29.6  | 30.8  | 28.2  | 1.61 | 4.8E-04 |
| BF0367 | hypothetical protein                                                | 18.1  | 15.3  | 17.0  | 42.9  | 38.4  | 38.6  | 2.38 | 9.7E-04 |
| BF0368 | hypothetical protein                                                | 17.3  | 17.7  | 20.0  | 47.4  | 46.6  | 39.0  | 2.42 | 1.7E-03 |
| BF0369 | putative transmembrane protein                                      | 15.3  | 17.9  | 17.2  | 36.9  | 38.4  | 29.4  | 2.07 | 5.6E-03 |
| BF0370 | putative FAD-binding oxidoreductase                                 | 23.3  | 25.9  | 25.0  | 41.4  | 41.7  | 37.7  | 1.63 | 2.0E-03 |
| BF0371 | hypothetical protein                                                | 20.5  | 26.6  | 19.5  | 43.4  | 35.9  | 42.6  | 1.84 | 1.5E-02 |
| BF0372 | putative transmembrane permease                                     | 10.3  | 10.4  | 9.3   | 33.2  | 34.0  | 30.9  | 3.27 | 2.2E-04 |
| BF0373 | hypothetical protein                                                | 14.7  | 15.5  | 12.3  | 37.0  | 37.7  | 35.3  | 2.60 | 1.2E-03 |
| BF0376 | putative PQQ-binding exported phosphoesterase                       | 3.3   | 4.0   | 3.6   | 20.7  | 16.9  | 16.7  | 4.93 | 5.5E-04 |
| BF0377 | possible exported xanthan lyase/N-acetylmuramoyl-L-alanine amidase  | 5.5   | 3.4   | 4.6   | 28.8  | 28.5  | 28.1  | 6.45 | 1.1E-03 |
| BF0378 | putative cation symporter                                           | 4.4   | 5.3   | 4.4   | 23.4  | 23.8  | 19.4  | 4.75 | 5.9E-04 |
| BF0379 | hypothetical protein                                                | 16.7  | 21.0  | 18.4  | 43.6  | 52.0  | 42.5  | 2.46 | 2.7E-03 |
| BF0380 | conserved hypothetical lipoprotein                                  | 4.1   | 3.6   | 4.3   | 29.2  | 30.2  | 25.9  | 7.08 | 1.6E-04 |
| BF0381 | hypothetical protein                                                | 15.8  | 15.6  | 17.4  | 39.4  | 45.9  | 42.7  | 2.62 | 5.8E-04 |
| BF0382 | hypothetical protein                                                | 71.9  | 65.2  | 68.2  | 89.0  | 99.6  | 99.3  | 1.40 | 6.2E-03 |
| asd    | putative aspartate-semialdehyde dehydrogenase                       | 434.2 | 386.3 | 444.9 | 794.3 | 722.4 | 729.5 | 1.78 | 2.1E-03 |
| BF0385 | putative Na <sup>+</sup> /H <sup>+</sup> antiporter                 | 195.4 | 223.1 | 219.1 | 186.8 | 194.7 | 202.9 | 0.92 | 2.0E-01 |
| BF0386 | putative ThiF family protein                                        | 111.7 | 88.7  | 103.8 | 95.5  | 112.9 | 115.2 | 1.07 | 5.9E-01 |
| BF0387 | putative ABC transporter ATP-binding protein                        | 87.0  | 85.6  | 78.5  | 82.7  | 75.9  | 91.5  | 0.99 | 9.5E-01 |
| BF0388 | hypothetical protein                                                | 38.5  | 35.8  | 36.4  | 24.8  | 31.4  | 34.5  | 0.81 | 1.6E-01 |
| BF0389 | putative sodium-dependent transporter                               | 238.9 | 260.4 | 239.6 | 204.3 | 208.2 | 208.1 | 0.84 | 1.1E-02 |
| BF0390 | putative transmembrane protein                                      | 546.4 | 633.7 | 571.0 | 443.8 | 473.6 | 516.0 | 0.82 | 5.6E-02 |
| murF   | putative UDP-N-acetylmuramoyl-tripeptide--D-alanyl-d-alanine ligase | 126.7 | 131.5 | 123.6 | 109.7 | 106.8 | 118.1 | 0.88 | 3.7E-02 |
| BF0392 | putative transporter/antibiotic resistance protein                  | 12.4  | 17.9  | 12.3  | 3.2   | 2.5   | 3.4   | 0.22 | 2.9E-03 |
| gadB   | putative glutamate decarboxylase                                    | 470.7 | 524.6 | 482.5 | 97.1  | 86.8  | 86.0  | 0.18 | 1.0E-04 |
| glsA   | putative glutaminase                                                | 489.2 | 552.8 | 513.3 | 139.0 | 124.4 | 161.9 | 0.27 | 7.7E-04 |
| BF0395 | putative two-component system sensor histidine kinase               | 48.6  | 48.5  | 43.3  | 15.8  | 20.4  | 19.6  | 0.40 | 2.1E-03 |
| folP   | putative dihydropteroate synthase                                   | 162.9 | 181.1 | 160.7 | 189.2 | 168.5 | 182.4 | 1.07 | 3.2E-01 |
| BF0397 | putative transmembrane protein                                      | 60.7  | 66.5  | 72.1  | 100.8 | 96.9  | 88.5  | 1.44 | 1.2E-02 |
| BF0400 | hypothetical protein                                                | 0.0   | 2.2   | 1.5   | 2.6   | 1.6   | 1.3   | 0.97 | 9.3E-01 |
| BF0401 | putative transmembrane protein                                      | 30.3  | 28.9  | 37.9  | 39.8  | 48.3  | 33.4  | 1.24 | 2.4E-01 |
| BF0402 | hypothetical protein                                                | 17.8  | 20.6  | 18.7  | 33.0  | 33.2  | 39.3  | 1.84 | 4.1E-03 |
| BF0403 | hypothetical protein                                                | 11.5  | 12.3  | 15.3  | 18.5  | 20.7  | 18.1  | 1.47 | 3.2E-02 |
| BF0404 | hypothetical protein                                                | 14.5  | 19.7  | 15.3  | 69.5  | 67.3  | 45.6  | 3.66 | 5.0E-03 |
| BF0405 | hypothetical protein                                                | 6.9   | 8.2   | 9.9   | 16.5  | 19.5  | 12.6  | 1.93 | 3.3E-02 |
| BF0406 | hypothetical protein                                                | 15.8  | 13.5  | 15.2  | 16.3  | 17.7  | 13.8  | 1.07 | 5.4E-01 |
| BF0409 | hypothetical protein                                                | 12.0  | 9.1   | 11.9  | 10.3  | 8.6   | 11.5  | 0.92 | 6.1E-01 |
| BF0411 | hypothetical protein                                                | 7.1   | 8.5   | 8.7   | 10.7  | 8.2   | 10.3  | 1.20 | 2.2E-01 |
| BF0412 | hypothetical protein                                                | 7.7   | 5.6   | 8.4   | 6.2   | 7.2   | 6.9   | 0.94 | 7.4E-01 |
| BF0413 | hypothetical protein                                                | 15.6  | 7.0   | 8.6   | 9.7   | 10.4  | 8.6   | 0.97 | 9.4E-01 |
| BF0414 | hypothetical protein                                                | 19.7  | 17.3  | 20.4  | 12.4  | 12.7  | 11.1  | 0.63 | 6.5E-03 |
| BF0415 | possible acetyltransferase                                          | 728.0 | 844.2 | 866.4 | 389.9 | 392.0 | 486.1 | 0.52 | 6.3E-03 |
| BF0416 | hypothetical protein                                                | 677.6 | 725.2 | 678.2 | 292.0 | 305.8 | 278.8 | 0.42 | 2.3E-04 |

|        |                                                                                                           |        |        |        |        |        |        |      |         |
|--------|-----------------------------------------------------------------------------------------------------------|--------|--------|--------|--------|--------|--------|------|---------|
| BF0417 | putative LrgB family transmembrane protein                                                                | 99.4   | 115.1  | 104.1  | 85.1   | 79.3   | 79.0   | 0.76 | 1.4E-02 |
| BF0418 | putative transmembrane holin-like protein LrgA                                                            | 118.7  | 121.8  | 117.5  | 79.4   | 71.7   | 86.4   | 0.66 | 5.7E-03 |
| BF0420 | hypothetical protein                                                                                      | 132.6  | 116.6  | 117.0  | 116.6  | 100.1  | 128.7  | 0.94 | 5.7E-01 |
| BF0421 | hypothetical protein                                                                                      | 36.5   | 29.9   | 29.0   | 36.9   | 30.7   | 43.7   | 1.16 | 3.7E-01 |
| BF0422 | hypothetical protein                                                                                      | 11.8   | 11.0   | 10.9   | 8.7    | 8.7    | 8.7    | 0.78 | 2.7E-03 |
| ptaA   | putative phosphate acetyltransferase                                                                      | 134.1  | 139.5  | 146.7  | 193.8  | 181.1  | 180.2  | 1.32 | 4.9E-03 |
| ackA   | putative acetate kinase                                                                                   | 142.0  | 168.7  | 189.4  | 216.3  | 236.2  | 229.5  | 1.37 | 4.2E-02 |
| BF0425 | putative alkaline phosphatase                                                                             | 137.9  | 121.4  | 133.1  | 189.1  | 189.7  | 183.2  | 1.43 | 3.4E-03 |
| BF0426 | hypothetical protein                                                                                      | 744.1  | 722.3  | 726.9  | 600.3  | 652.4  | 600.0  | 0.84 | 1.2E-02 |
| BF0427 | putative UDP-2,3-diacetylglucosamine hydrolase                                                            | 525.7  | 489.7  | 521.2  | 446.2  | 504.4  | 500.1  | 0.94 | 3.4E-01 |
| radC1  | putative DNA repair protein                                                                               | 72.3   | 75.0   | 86.9   | 56.5   | 67.2   | 70.1   | 0.83 | 1.4E-01 |
| BF0429 | putative glycosyltransferase                                                                              | 65.5   | 59.6   | 58.3   | 62.6   | 62.3   | 53.8   | 0.97 | 7.3E-01 |
| efp    | elongation factor P                                                                                       | 1202.8 | 1244.3 | 1214.1 | 1580.0 | 1567.7 | 1568.3 | 1.29 | 2.4E-04 |
| BF0432 | 50S ribosomal protein L34                                                                                 | 1715.5 | 1890.8 | 1844.7 | 2131.8 | 1828.5 | 1891.3 | 1.07 | 3.4E-01 |
| BF0433 | putative transmembrane PASTA-domain protein                                                               | 254.5  | 235.0  | 201.9  | 203.4  | 189.3  | 208.0  | 0.87 | 1.9E-01 |
| rluD   | ribosomal large subunit pseudouridine synthase                                                            | 149.0  | 147.5  | 149.6  | 168.3  | 143.6  | 184.9  | 1.11 | 3.0E-01 |
| ddl    | D-alanylalanine synthetase                                                                                | 107.5  | 100.7  | 106.0  | 99.1   | 90.1   | 117.0  | 0.97 | 7.6E-01 |
| BF0436 | hypothetical protein                                                                                      | 130.4  | 104.7  | 108.2  | 129.0  | 145.1  | 162.6  | 1.27 | 1.0E-01 |
| BF0437 | hypothetical protein                                                                                      | 77.3   | 78.7   | 69.8   | 76.2   | 88.1   | 128.9  | 1.27 | 2.8E-01 |
| BF0438 | conserved hypothetical rhodanese-domain protein                                                           | 103.8  | 83.9   | 96.7   | 129.7  | 131.0  | 145.3  | 1.43 | 1.8E-02 |
| BF0439 | putative ornithine carbamoyltransferase                                                                   | 295.7  | 304.2  | 285.1  | 309.7  | 312.1  | 303.4  | 1.05 | 1.4E-01 |
| BF0440 | hypothetical protein                                                                                      | 116.2  | 111.0  | 99.4   | 97.5   | 83.8   | 107.7  | 0.88 | 2.9E-01 |
| BF0441 | hypothetical protein                                                                                      | 42.8   | 47.2   | 35.5   | 36.8   | 38.5   | 38.4   | 0.91 | 4.1E-01 |
| proA   | gamma-glutamyl phosphate reductase                                                                        | 138.4  | 117.2  | 120.2  | 137.2  | 120.5  | 136.9  | 1.05 | 5.7E-01 |
| proB   | gamma-glutamyl kinase                                                                                     | 350.0  | 319.6  | 308.0  | 284.1  | 272.0  | 285.3  | 0.86 | 4.1E-02 |
| BF0445 | hypothetical protein                                                                                      | 580.0  | 559.9  | 504.2  | 303.4  | 304.3  | 323.6  | 0.57 | 1.5E-03 |
| murI   | putative glutamate racemase                                                                               | 102.4  | 100.0  | 107.2  | 99.8   | 86.5   | 82.9   | 0.87 | 1.2E-01 |
| BF0447 | putative outer membrane protein                                                                           | 3912.7 | 4212.7 | 4162.3 | 3649.4 | 3557.8 | 2991.6 | 0.83 | 7.7E-02 |
| ompH   | putative cationic 19 kDa outer membrane protein precursor                                                 | 466.1  | 539.4  | 456.8  | 430.7  | 456.1  | 365.1  | 0.85 | 1.9E-01 |
| BF0449 | putative outer membrane protein                                                                           | 736.8  | 774.2  | 749.2  | 488.9  | 516.7  | 470.3  | 0.65 | 1.1E-03 |
| uppS   | putative undecaprenyl pyrophosphate synthetase                                                            | 605.2  | 590.4  | 568.9  | 398.2  | 389.1  | 394.1  | 0.67 | 3.6E-04 |
| BF0451 | hypothetical protein                                                                                      | 1210.0 | 1180.1 | 1228.3 | 670.2  | 693.7  | 611.6  | 0.55 | 7.7E-04 |
| BF0452 | putative riboflavin biosynthesis protein [includes: diaminohydroxyphosphoribosylaminopyrimidine deaminase | 45.0   | 47.3   | 55.5   | 52.3   | 52.1   | 53.3   | 1.07 | 4.1E-01 |
| BF0453 | putative protoporphyrinogen oxidase                                                                       | 71.9   | 59.4   | 56.4   | 45.8   | 34.2   | 42.1   | 0.65 | 3.7E-02 |
| BF0454 | putative transcriptional regulatory protein                                                               | 82.0   | 63.0   | 72.3   | 67.3   | 67.2   | 59.3   | 0.90 | 3.4E-01 |
| pyrE   | orotate phosphoribosyltransferase                                                                         | 1005.1 | 1087.1 | 1063.9 | 1022.8 | 1034.9 | 1021.2 | 0.98 | 4.4E-01 |
| BF0456 | putative conserved hypothetical protein                                                                   | 306.5  | 295.9  | 330.9  | 286.1  | 290.3  | 272.2  | 0.91 | 1.1E-01 |
| argH   | argininosuccinate lyase                                                                                   | 363.0  | 389.8  | 403.9  | 323.2  | 321.9  | 306.7  | 0.82 | 1.4E-02 |

|        |                                                        |       |       |       |       |       |       |      |         |
|--------|--------------------------------------------------------|-------|-------|-------|-------|-------|-------|------|---------|
| BFt04  | tRNA-Gly-GCC                                           | 0.0   | 0.0   | 0.0   | 0.0   | 0.0   | 0.0   |      |         |
| BFt05  | tRNA-Leu-TAA                                           | 0.0   | 0.0   | 0.0   | 0.0   | 0.0   | 0.0   |      |         |
| BF0458 | putative bacteriophage<br>resolvase/recombinase        | 27.2  | 29.2  | 32.2  | 23.2  | 22.2  | 39.8  | 0.93 | 7.7E-01 |
| BF0462 | putative regulatory protein                            | 19.4  | 10.3  | 14.7  | 34.5  | 33.7  | 27.9  | 2.23 | 3.0E-02 |
| BF0463 | hypothetical protein                                   | 0.6   | 0.0   | 1.3   | 1.1   | 0.0   | 0.6   | 0.91 | 9.0E-01 |
| BF0465 | putative integrase/recombinase                         | 4.2   | 5.4   | 4.0   | 1.4   | 1.4   | 1.4   | 0.32 | 1.6E-03 |
| BF0466 | putative TonB-dependent receptor                       | 85.9  | 55.6  | 82.8  | 64.4  | 83.2  | 79.9  | 1.03 | 9.0E-01 |
| BF0467 | putative phage-derived protein                         | 38.4  | 41.0  | 44.1  | 72.9  | 98.7  | 76.2  | 1.99 | 7.8E-03 |
| BF0468 | hypothetical protein                                   | 149.8 | 153.5 | 173.5 | 224.0 | 285.2 | 206.5 | 1.49 | 3.9E-02 |
| BF0469 | putative transmembrane protein                         | 2.8   | 0.7   | 0.0   | 0.0   | 0.0   | 0.0   |      |         |
| BF0470 | hypothetical protein                                   | 46.2  | 45.0  | 50.5  | 72.7  | 79.2  | 55.2  | 1.45 | 5.6E-02 |
| BF0471 | hypothetical protein                                   | 14.0  | 14.0  | 15.8  | 18.6  | 17.5  | 15.1  | 1.17 | 1.5E-01 |
| BF0472 | hypothetical protein                                   | 13.8  | 6.8   | 13.2  | 24.4  | 30.9  | 16.8  | 2.17 | 8.8E-02 |
| BF0473 | hypothetical protein                                   | 36.0  | 39.7  | 42.8  | 40.2  | 52.4  | 27.9  | 0.99 | 9.6E-01 |
| BF0474 | hypothetical protein                                   | 7.8   | 6.9   | 7.7   | 16.3  | 16.8  | 18.2  | 2.28 | 7.3E-04 |
| BF0475 | hypothetical protein                                   | 517.9 | 628.4 | 583.9 | 374.4 | 338.4 | 389.9 | 0.64 | 8.9E-03 |
| BF0476 | putative Acyl-CoA synthetase                           | 124.1 | 130.9 | 111.6 | 200.9 | 190.2 | 182.9 | 1.57 | 4.4E-03 |
| BF0477 | putative regulatory protein                            | 107.5 | 105.8 | 114.5 | 191.0 | 177.4 | 134.2 | 1.52 | 3.7E-02 |
| BF0478 | putative pyrroline-5-carboxylate<br>reductase          | 229.8 | 231.1 | 239.5 | 245.2 | 233.1 | 208.6 | 0.98 | 7.4E-01 |
| argD   | putative acetylornithine<br>aminotransferase           | 385.4 | 454.6 | 422.1 | 405.4 | 391.1 | 347.7 | 0.91 | 2.8E-01 |
| argC   | putative acetylglutamyl phosphate<br>reductase         | 298.1 | 299.4 | 283.3 | 316.5 | 309.5 | 232.3 | 0.97 | 7.9E-01 |
| argG   | putative argininosuccinate synthase                    | 307.4 | 284.5 | 298.9 | 340.9 | 315.6 | 254.5 | 1.02 | 9.0E-01 |
| BF0482 | putative acetyltransferase                             | 178.0 | 151.1 | 165.8 | 177.6 | 180.3 | 149.4 | 1.02 | 8.1E-01 |
| argR   | putative arginine repressor                            | 173.1 | 151.7 | 160.3 | 203.2 | 191.8 | 158.9 | 1.14 | 2.6E-01 |
| BFt06  | tRNA-Pro-CGG                                           | 79.8  | 105.4 | 18.6  | 48.1  | 11.2  | 190.1 | 0.87 | 9.2E-01 |
| BFt07  | tRNA-Phe-GAA                                           | 44.7  | 68.1  | 37.3  | 34.4  | 22.4  | 144.9 | 0.99 | 9.9E-01 |
| BF0486 | putative two-component histidine<br>sensor kinase      | 115.6 | 115.4 | 126.9 | 61.3  | 64.1  | 70.0  | 0.55 | 1.5E-03 |
| BF0487 | putative glutamate:gamma-<br>aminobutyrate antiporter  | 230.9 | 288.9 | 246.8 | 62.5  | 55.7  | 59.6  | 0.23 | 4.2E-04 |
| BF0488 | putative ion transport protein                         | 44.2  | 47.0  | 58.7  | 11.8  | 10.8  | 11.2  | 0.23 | 6.4E-04 |
| BF0489 | putative malate dehydrogenase                          | 219.9 | 259.2 | 243.0 | 128.2 | 108.3 | 107.8 | 0.48 | 2.6E-03 |
| BF0491 | hypothetical protein                                   | 270.6 | 259.5 | 253.8 | 223.8 | 230.3 | 236.1 | 0.88 | 1.6E-02 |
| BF0492 | hypothetical protein                                   | 104.4 | 107.0 | 99.8  | 340.4 | 352.4 | 316.8 | 3.24 | 1.2E-04 |
| BF0493 | hypothetical protein                                   | 142.4 | 148.4 | 144.1 | 387.7 | 419.6 | 317.8 | 2.57 | 1.8E-03 |
| BF0494 | hypothetical protein                                   | 116.4 | 137.9 | 129.1 | 399.3 | 380.7 | 398.7 | 3.08 | 3.3E-04 |
| BF0495 | putative bioynthetic peptidoglycan<br>transglycosylase | 12.4  | 16.3  | 14.7  | 20.0  | 18.8  | 23.8  | 1.45 | 4.7E-02 |
| BF0496 | putative mismatch repair-like protein                  | 76.3  | 77.3  | 77.0  | 68.7  | 76.3  | 74.7  | 0.95 | 2.6E-01 |
| BF0497 | hypothetical protein                                   | 56.9  | 55.9  | 49.2  | 71.2  | 87.8  | 63.1  | 1.36 | 7.5E-02 |
| BF0498 | putative melibiase                                     | 2.8   | 4.8   | 3.1   | 7.8   | 9.6   | 7.5   | 2.36 | 1.9E-02 |
| BF0499 | putative glycosyl hydrolase, alpha-<br>xylosidase      | 1.0   | 1.1   | 0.8   | 4.4   | 4.4   | 3.2   | 4.13 | 2.9E-03 |
| BF0500 | putative outer membrane protein                        | 1.2   | 1.8   | 1.4   | 6.2   | 6.0   | 6.5   | 4.35 | 1.1E-03 |
| BF0501 | putative outer membrane protein                        | 1.5   | 2.0   | 2.2   | 6.5   | 4.6   | 5.7   | 2.98 | 6.7E-03 |
| BF0502 | putative anti-sigma factor                             | 4.2   | 4.2   | 3.8   | 8.8   | 6.6   | 7.1   | 1.84 | 8.8E-03 |

|        |                                                                     |        |        |        |        |        |        |      |         |
|--------|---------------------------------------------------------------------|--------|--------|--------|--------|--------|--------|------|---------|
| BF0503 | putative ECF-type RNA polymerase sigma factor                       | 15.1   | 13.4   | 19.7   | 15.2   | 16.8   | 19.3   | 1.07 | 6.9E-01 |
| BF0504 | hypothetical protein                                                | 0.0    | 2.3    | 2.4    | 1.0    | 1.3    | 1.0    | 0.47 | 5.3E-03 |
| BF0505 | hypothetical protein                                                | 7.1    | 0.0    | 7.8    | 4.5    | 2.7    | 0.0    | 0.47 | 1.4E-01 |
| BF0506 | putative outer membrane transport/efflux protein                    | 200.3  | 202.1  | 170.2  | 205.7  | 194.8  | 182.9  | 1.02 | 8.1E-01 |
| BF0507 | putative transport/efflux component protein                         | 131.9  | 147.8  | 135.2  | 178.8  | 176.8  | 151.4  | 1.22 | 6.1E-02 |
| BF0509 | putative ATP-binding component of ABC transporter                   | 88.7   | 86.4   | 69.6   | 89.2   | 75.9   | 91.2   | 1.05 | 7.0E-01 |
| BF0510 | putative ABC transporter                                            | 187.4  | 205.1  | 169.9  | 142.7  | 133.4  | 124.0  | 0.71 | 1.8E-02 |
| BF0511 | putative ABC transporter ATP-binding protein                        | 275.1  | 288.2  | 259.6  | 151.4  | 157.8  | 152.3  | 0.56 | 5.7E-04 |
| BF0512 | putative ROK family transcriptional repressor                       | 1619.7 | 1564.5 | 1600.0 | 1647.3 | 1574.8 | 1823.9 | 1.05 | 3.8E-01 |
| BF0513 | 50S ribosomal protein L19                                           | 3955.7 | 4105.8 | 3754.9 | 3237.0 | 2724.4 | 3037.4 | 0.76 | 1.9E-02 |
| BF0514 | putative 5'nucleotidase/UDP-sugar hydrolase                         | 112.0  | 96.1   | 89.4   | 116.2  | 106.7  | 122.9  | 1.17 | 1.7E-01 |
| BF0515 | possible secreted 5'-nucleotidase                                   | 116.0  | 108.6  | 120.0  | 125.3  | 127.5  | 137.9  | 1.13 | 6.6E-02 |
| BF0516 | possible beta-N-acetylglucosaminidase/beta-lactamase fusion protein | 68.8   | 70.6   | 63.0   | 79.3   | 72.7   | 86.3   | 1.18 | 8.9E-02 |
| BF0517 | putative hydrolase/beta lactamase fusion protein                    | 55.7   | 60.0   | 51.2   | 73.2   | 75.3   | 76.6   | 1.35 | 9.4E-03 |
| BF0518 | putative outer membrane protein                                     | 22.8   | 28.5   | 26.4   | 160.1  | 163.5  | 142.1  | 6.01 | 2.9E-04 |
| BF0519 | hypothetical protein                                                | 18.6   | 21.4   | 17.2   | 186.2  | 181.7  | 170.2  | 9.44 | 1.1E-04 |
| BF0520 | putative arylsulfatase                                              | 15.1   | 14.4   | 14.8   | 84.6   | 92.1   | 91.0   | 6.05 | 1.4E-05 |
| BF0521 | hypothetical protein                                                | 1007.2 | 1110.9 | 1103.2 | 286.7  | 262.9  | 305.1  | 0.27 | 2.3E-04 |
| BF0522 | hypothetical protein                                                | 1412.7 | 1560.5 | 1509.0 | 311.0  | 293.0  | 307.0  | 0.20 | 3.3E-05 |
| BF0523 | hypothetical protein                                                | 31.1   | 34.7   | 31.5   | 89.0   | 95.9   | 81.9   | 2.74 | 5.6E-04 |
| BF0524 | putative MarR family transcriptional regulator                      | 114.6  | 143.3  | 109.6  | 97.2   | 98.9   | 99.3   | 0.81 | 1.0E-01 |
| BF0525 | putative pyridine nucleotide oxidoreductase                         | 113.8  | 132.2  | 106.9  | 97.5   | 88.8   | 91.4   | 0.79 | 4.8E-02 |
| BF0526 | putative aspartate kinase                                           | 0.7    | 1.5    | 0.3    | 0.1    | 0.4    | 0.2    | 0.34 | 2.1E-01 |
| BF0527 | putative two-component response regulator-like protein              | 145.3  | 138.1  | 133.0  | 155.7  | 141.2  | 154.2  | 1.08 | 1.7E-01 |
| kdpA   | potassium-transporting ATPase subunit A                             | 2.3    | 1.8    | 2.5    | 0.5    | 1.0    | 0.7    | 0.32 | 1.6E-02 |
| kdpB   | putative potassium-transporting ATPase B chain                      | 2.0    | 1.8    | 1.7    | 0.7    | 0.6    | 1.6    | 0.46 | 1.1E-01 |
| kdpC   | potassium-transporting ATPase c chain                               | 0.6    | 0.7    | 1.3    | 0.3    | 0.4    | 0.6    | 0.48 | 1.4E-01 |
| frrB   | hypothetical protein                                                | 2.8    | 2.5    | 1.6    | 2.0    | 1.4    | 1.4    | 0.70 | 2.4E-01 |
| kdpD   | putative osmosensitive potassium transport sensor protein           | 0.8    | 1.7    | 1.7    | 0.9    | 0.9    | 0.8    | 0.65 | 2.3E-01 |
| frrD   | putative two-component sensor histidine kinase                      | 32.1   | 32.2   | 34.0   | 37.2   | 39.2   | 33.6   | 1.12 | 1.3E-01 |
| rpoE   | putative RNA polymerase ECF sigma factor                            | 73.8   | 65.2   | 85.1   | 90.4   | 114.1  | 98.4   | 1.35 | 7.1E-02 |
| frrF   | putative anti-sigma factor                                          | 59.9   | 62.6   | 65.0   | 79.7   | 81.0   | 73.2   | 1.25 | 1.3E-02 |
| frrG   | putative outer membrane protein                                     | 22.7   | 20.1   | 23.6   | 32.1   | 30.5   | 34.0   | 1.46 | 8.9E-03 |

|        |                                                                                                                                           |        |        |        |        |        |        |      |         |
|--------|-------------------------------------------------------------------------------------------------------------------------------------------|--------|--------|--------|--------|--------|--------|------|---------|
| frrH   | putative outer membrane protein                                                                                                           | 5.3    | 5.3    | 4.6    | 14.3   | 14.1   | 14.3   | 2.82 | 3.8E-04 |
| frrI   | hypothetical protein                                                                                                                      | 6.6    | 8.9    | 10.4   | 19.3   | 20.2   | 21.4   | 2.38 | 8.8E-03 |
| BF0539 | hypothetical protein                                                                                                                      | 17.7   | 16.3   | 15.0   | 12.2   | 13.4   | 12.9   | 0.79 | 2.7E-02 |
| BF0540 | hypothetical protein                                                                                                                      | 79.4   | 75.7   | 86.1   | 131.4  | 142.4  | 122.9  | 1.64 | 3.7E-03 |
| BF0541 | conserved hypothetical protein                                                                                                            | 25.5   | 18.3   | 29.9   | 26.2   | 34.5   | 22.9   | 1.14 | 5.9E-01 |
| BFt08  | tRNA-Met-CAT                                                                                                                              | 9.2    | 2.4    | 10.1   | 6.5    | 8.0    | 8.8    | 1.26 | 7.0E-01 |
| BF0542 | hypothetical protein                                                                                                                      | 822.1  | 775.0  | 808.3  | 719.9  | 775.5  | 635.6  | 0.88 | 1.6E-01 |
| BF0543 | putative permease                                                                                                                         | 293.0  | 297.8  | 315.9  | 229.1  | 253.3  | 220.7  | 0.77 | 1.4E-02 |
| ribA   | putative riboflavin biosynthesis protein [includes: GTP cyclohydrolase ii; 3,4-dihydroxy-2-butanone 4-phosphate synthase (dhbp synthase)] | 314.7  | 325.6  | 328.2  | 351.3  | 347.9  | 344.3  | 1.08 | 1.5E-02 |
| aspC1  | putative aspartate aminotransferase                                                                                                       | 737.6  | 670.7  | 683.1  | 951.0  | 903.0  | 902.0  | 1.32 | 4.6E-03 |
| BF0546 | putative exported rhamnosidase A                                                                                                          | 11.7   | 9.8    | 9.9    | 8.3    | 8.5    | 9.7    | 0.84 | 1.2E-01 |
| BF0547 | hypothetical protein                                                                                                                      | 2828.3 | 3250.2 | 3349.5 | 4063.2 | 4902.9 | 4068.9 | 1.38 | 3.3E-02 |
| metA   | homoserine O-succinyltransferase                                                                                                          | 142.2  | 127.8  | 132.7  | 155.0  | 167.8  | 151.8  | 1.18 | 3.8E-02 |
| BF0549 | putative protease                                                                                                                         | 138.9  | 130.1  | 115.2  | 130.0  | 118.7  | 153.2  | 1.04 | 7.2E-01 |
| BF0550 | putative transmembrane protein                                                                                                            | 213.7  | 212.9  | 183.1  | 173.1  | 157.8  | 183.9  | 0.84 | 1.1E-01 |
| BF0551 | putative TonB dependent receptor                                                                                                          | 3040.6 | 3117.2 | 2663.8 | 2729.9 | 2227.9 | 2790.2 | 0.88 | 2.6E-01 |
| BF0552 | putative LuxR family transcriptional regulator                                                                                            | 36.8   | 40.4   | 36.3   | 39.6   | 28.3   | 35.5   | 0.90 | 4.6E-01 |
| BF0553 | hypothetical protein                                                                                                                      | 59.7   | 66.1   | 49.6   | 62.9   | 47.2   | 74.3   | 1.04 | 8.5E-01 |
| BF0554 | hypothetical protein                                                                                                                      | 72.1   | 74.2   | 71.0   | 71.5   | 65.4   | 63.7   | 0.92 | 1.4E-01 |
| radA   | putative DNA repair protein                                                                                                               | 103.8  | 115.1  | 80.4   | 128.0  | 91.1   | 163.8  | 1.26 | 3.9E-01 |
| BF0556 | putative L-asparaginase I                                                                                                                 | 8.6    | 9.0    | 7.6    | 9.6    | 10.0   | 11.5   | 1.24 | 7.9E-02 |
| thrA   | putative aspartokinase I-homoserine dehydrogenase                                                                                         | 514.9  | 520.5  | 430.7  | 519.3  | 438.4  | 569.6  | 1.04 | 7.6E-01 |
| BF0559 | cofactor-independent phosphoglycerate mutase                                                                                              | 525.9  | 539.7  | 381.4  | 434.1  | 294.6  | 556.0  | 0.87 | 6.2E-01 |
| thrC   | threonine synthase                                                                                                                        | 1176.1 | 1211.2 | 993.3  | 871.1  | 689.3  | 1023.7 | 0.76 | 1.5E-01 |
| BF0561 | hypothetical protein                                                                                                                      | 947.7  | 927.0  | 789.1  | 638.3  | 592.7  | 675.5  | 0.72 | 2.0E-02 |
| BF0562 | putative transmembrane protein                                                                                                            | 181.6  | 194.0  | 178.0  | 86.2   | 85.5   | 93.1   | 0.48 | 4.2E-04 |
| BF0563 | hypothetical protein                                                                                                                      | 131.8  | 134.5  | 108.0  | 92.7   | 89.0   | 118.8  | 0.80 | 1.7E-01 |
| BF0564 | putative nicotinamide mononucleotide transporter                                                                                          | 37.6   | 39.0   | 34.2   | 15.2   | 11.1   | 16.0   | 0.38 | 4.7E-03 |
| BF0565 | putative TonB-dependent transmembrane receptor protein                                                                                    | 15.1   | 13.7   | 12.5   | 5.7    | 5.0    | 8.5    | 0.45 | 2.1E-02 |
| TPP    | RF00059                                                                                                                                   | 7.4    | 5.9    | 0.0    | 0.0    | 2.1    | 14.1   | 0.83 | 9.0E-01 |
| BF0566 | putative transmembrane protein                                                                                                            | 177.4  | 154.1  | 162.6  | 133.3  | 136.6  | 161.2  | 0.87 | 1.8E-01 |
| BF0567 | hypothetical protein                                                                                                                      | 2318.1 | 2626.1 | 2079.0 | 740.7  | 790.8  | 675.0  | 0.31 | 9.7E-04 |
| BF0568 | putative RNA polymerase ECF-type sigma factor                                                                                             | 112.8  | 110.8  | 115.0  | 83.1   | 96.6   | 93.3   | 0.80 | 2.2E-02 |
| BF0569 | putative anti-sigma factor                                                                                                                | 90.3   | 80.8   | 87.7   | 68.1   | 66.3   | 78.3   | 0.82 | 5.7E-02 |
| BF0570 | hypothetical protein                                                                                                                      | 6.6    | 7.2    | 7.0    | 4.4    | 4.2    | 5.4    | 0.67 | 1.8E-02 |
| BF0571 | putative TonB-linked outer membrane receptor protein                                                                                      | 3.7    | 4.1    | 4.4    | 5.4    | 5.7    | 5.3    | 1.34 | 1.7E-02 |
| BF0572 | putative outer membrane protein                                                                                                           | 3.4    | 4.1    | 3.7    | 7.0    | 7.3    | 6.2    | 1.84 | 4.6E-03 |
| BF0573 | putative beta-galactosidase                                                                                                               | 3.5    | 3.6    | 3.6    | 5.0    | 6.6    | 5.8    | 1.62 | 9.6E-03 |
| BF0574 | putative glycosyl hydrolase                                                                                                               | 4.9    | 3.8    | 4.0    | 5.9    | 5.6    | 7.9    | 1.53 | 5.6E-02 |
| BF0575 | putative glycosyl hydrolase/xylanase                                                                                                      | 8.1    | 7.8    | 6.5    | 11.2   | 10.6   | 12.6   | 1.53 | 1.8E-02 |
| BF0576 | hypothetical protein                                                                                                                      | 44.9   | 37.1   | 39.5   | 47.2   | 42.7   | 66.9   | 1.27 | 2.4E-01 |

|        |                                                         |        |        |        |        |        |        |      |         |
|--------|---------------------------------------------------------|--------|--------|--------|--------|--------|--------|------|---------|
| BF0577 | conserved hypothetical lipoprotein                      | 2.6    | 2.9    | 3.3    | 5.9    | 5.8    | 5.7    | 1.98 | 3.2E-03 |
| BF0578 | putative TonB-dependent outer membrane receptor protein | 3.3    | 3.3    | 1.7    | 2.7    | 1.3    | 3.4    | 0.87 | 7.8E-01 |
| BF0581 | putative AraC family transcriptional regulatory protein | 145.0  | 152.4  | 151.8  | 248.3  | 261.2  | 230.3  | 1.65 | 1.4E-03 |
| BFt09  | tRNA-Lys-TTT                                            | 14.5   | 28.3   | 27.9   | 22.9   | 26.6   | 40.6   | 1.29 | 4.8E-01 |
| BF0582 | putative transmembrane protein                          | 67.5   | 64.4   | 63.4   | 69.5   | 70.2   | 61.3   | 1.03 | 6.5E-01 |
| tdk    | putative thymidine kinase                               | 113.2  | 109.5  | 105.6  | 91.7   | 90.6   | 90.0   | 0.83 | 3.6E-03 |
| BF0584 | hypothetical protein                                    | 377.4  | 407.0  | 334.0  | 260.6  | 219.5  | 409.6  | 0.77 | 3.2E-01 |
| BF0585 | putative tetrapyrrole (corrin/porphyrin) methylase      | 1035.5 | 1089.1 | 900.7  | 414.0  | 398.3  | 412.5  | 0.41 | 7.6E-04 |
| BF0586 | hypothetical protein                                    | 1709.2 | 1768.6 | 1769.3 | 1270.5 | 1244.1 | 1074.7 | 0.68 | 6.7E-03 |
| BF0587 | putative haloacid dehalogenase-like hydrolase protein   | 138.5  | 141.4  | 129.3  | 41.3   | 50.1   | 50.8   | 0.35 | 8.9E-04 |
| BF0588 | putative amino acid transporter                         | 80.7   | 82.4   | 91.6   | 61.2   | 76.3   | 63.2   | 0.79 | 6.6E-02 |
| BF0589 | hypothetical protein                                    | 819.0  | 849.1  | 856.6  | 499.1  | 495.7  | 400.8  | 0.55 | 4.6E-03 |
| BF0590 | putative surface membrane protein                       | 769.6  | 863.1  | 828.1  | 610.6  | 588.1  | 497.9  | 0.69 | 1.5E-02 |
| BF0591 | putative outer membrane receptor protein                | 122.3  | 128.0  | 140.5  | 92.8   | 93.4   | 71.9   | 0.66 | 2.5E-02 |
| BF0592 | putative surface membrane protein                       | 109.6  | 119.2  | 126.6  | 98.3   | 100.0  | 82.7   | 0.79 | 5.7E-02 |
| BF0593 | putative integrase/transposase                          | 15.8   | 13.3   | 16.3   | 9.3    | 8.8    | 8.5    | 0.59 | 5.3E-03 |
| BF0594 | hypothetical protein                                    | 1661.4 | 1832.4 | 1848.3 | 937.4  | 980.0  | 799.4  | 0.51 | 2.9E-03 |
| BF0595 | hypothetical protein                                    | 2155.8 | 2343.2 | 2355.7 | 1023.0 | 1023.9 | 829.5  | 0.42 | 1.7E-03 |
| BF0596 | putative surface membrane protein                       | 808.4  | 864.8  | 830.9  | 394.0  | 396.8  | 361.1  | 0.46 | 3.3E-04 |
| BF0597 | hypothetical protein                                    | 869.0  | 891.2  | 854.9  | 406.6  | 404.8  | 358.8  | 0.45 | 4.7E-04 |
| BF0598 | putative GTP-binding protein                            | 366.7  | 344.8  | 299.2  | 323.0  | 283.3  | 373.4  | 0.97 | 8.0E-01 |
| BF0599 | hypothetical protein                                    | 397.7  | 383.8  | 363.5  | 240.8  | 244.7  | 261.6  | 0.65 | 1.7E-03 |
| BF0600 | putative aminopeptidase                                 | 171.4  | 186.0  | 163.6  | 122.0  | 106.5  | 141.1  | 0.71 | 3.5E-02 |
| fumB   | putative fumarate hydratase class I, anaerobic          | 460.4  | 492.1  | 452.0  | 497.8  | 452.2  | 501.3  | 1.03 | 5.6E-01 |
| BF0602 | putative transmembrane acyl-transferase protein         | 57.4   | 58.0   | 52.1   | 59.0   | 60.4   | 59.1   | 1.07 | 2.0E-01 |
| BF0603 | putative alpha-N-acetylglucosaminidase                  | 51.9   | 48.5   | 44.0   | 64.2   | 54.6   | 69.3   | 1.30 | 6.3E-02 |
| BF0604 | putative amino acid transporter                         | 79.8   | 87.5   | 76.5   | 83.1   | 71.6   | 83.2   | 0.98 | 7.6E-01 |
| BF0606 | putative outer membrane protein                         | 22.9   | 20.0   | 18.3   | 57.1   | 50.4   | 52.6   | 2.63 | 1.3E-03 |
| BF0607 | putative AcrB/AcrD/AcrF family efflux transporter       | 16.9   | 17.5   | 15.8   | 54.1   | 53.0   | 45.7   | 3.04 | 5.2E-04 |
| BF0608 | putative HlyD-family efflux transporter component       | 35.5   | 35.2   | 34.6   | 86.6   | 91.3   | 101.4  | 2.65 | 3.7E-04 |
| BF0609 | putative HlyD-family transporter                        | 21.5   | 22.6   | 25.9   | 136.7  | 143.8  | 120.6  | 5.74 | 2.9E-04 |
| BF0610 | putative ATP-binding transporter component              | 30.5   | 28.9   | 36.3   | 217.1  | 231.2  | 175.6  | 6.50 | 5.8E-04 |
| BF0611 | putative transmembrane amino-terminal protease          | 52.2   | 63.6   | 62.6   | 327.3  | 354.1  | 264.7  | 5.28 | 7.6E-04 |
| BF0612 | hypothetical protein                                    | 403.4  | 420.2  | 410.4  | 3641.2 | 3735.7 | 3045.5 | 8.41 | 1.1E-04 |
| BF0614 | possible glycosyl transferase                           | 72.3   | 87.4   | 101.3  | 350.6  | 401.1  | 296.1  | 4.02 | 2.2E-03 |
| BF0615 | hypothetical protein                                    | 99.8   | 111.7  | 110.3  | 570.9  | 706.7  | 521.5  | 5.55 | 5.5E-04 |
| BF0616 | hypothetical protein                                    | 2.4    | 2.6    | 0.0    | 1.5    | 0.0    | 1.5    | 0.62 | 1.1E-02 |
| BF0618 | ribosome-associated GTPase                              | 202.7  | 198.4  | 178.3  | 264.6  | 259.5  | 245.5  | 1.33 | 9.5E-03 |
| frr    | ribosome releasing factor                               | 580.9  | 540.0  | 539.6  | 1202.6 | 1029.5 | 1163.8 | 2.04 | 1.1E-03 |

|        |                                                           |        |        |        |        |        |        |      |         |
|--------|-----------------------------------------------------------|--------|--------|--------|--------|--------|--------|------|---------|
| BF0620 | hypothetical protein                                      | 1.7    | 2.0    | 3.1    | 5.8    | 5.4    | 4.8    | 2.46 | 2.3E-02 |
| BF0621 | putative ErkK/YbiS/Ycfs/YnhG family protein               | 1.6    | 1.0    | 1.1    | 4.8    | 7.4    | 1.2    | 2.95 | 1.8E-01 |
| BF0622 | hypothetical protein                                      | 2.5    | 2.3    | 1.8    | 6.2    | 4.5    | 5.6    | 2.45 | 8.5E-03 |
| dnaK1  | putative chaperone protein                                | 2.0    | 1.8    | 3.7    | 15.9   | 15.7   | 13.8   | 6.43 | 4.6E-03 |
| BF0624 | possible Hsp-70 cofactor                                  | 2.9    | 2.0    | 3.2    | 10.4   | 8.9    | 8.0    | 3.42 | 5.8E-03 |
| BF0625 | hypothetical protein                                      | 74.0   | 64.7   | 81.7   | 51.6   | 60.9   | 49.3   | 0.73 | 5.3E-02 |
| BF0626 | putative uridylate kinase                                 | 300.5  | 279.8  | 282.3  | 402.9  | 376.1  | 435.7  | 1.41 | 6.7E-03 |
| dinF   | putative DNA-damage-inducible protein F                   | 63.1   | 63.4   | 61.5   | 43.9   | 44.0   | 42.3   | 0.69 | 2.9E-04 |
| BF0629 | putative endo-beta-galactosidase                          | 30.4   | 25.0   | 39.5   | 25.0   | 27.9   | 27.7   | 0.86 | 4.1E-01 |
| BF0630 | hypothetical protein                                      | 218.0  | 201.8  | 198.2  | 117.8  | 133.5  | 135.6  | 0.63 | 3.7E-03 |
| BF0631 | hypothetical protein                                      | 163.0  | 166.4  | 170.0  | 115.8  | 115.3  | 88.6   | 0.64 | 1.7E-02 |
| BF0632 | putative biotin/lipoate A/B protein ligase family protein | 13.1   | 15.4   | 16.4   | 33.0   | 27.8   | 26.6   | 1.95 | 6.7E-03 |
| BF0633 | hypothetical protein                                      | 24.7   | 15.8   | 29.9   | 35.6   | 32.0   | 35.1   | 1.51 | 1.5E-01 |
| BF0634 | hypothetical protein                                      | 26.5   | 20.0   | 30.8   | 12.3   | 10.6   | 15.3   | 0.50 | 2.8E-02 |
| BF0636 | hypothetical protein                                      | 58.8   | 59.4   | 51.5   | 87.9   | 59.4   | 99.8   | 1.43 | 1.4E-01 |
| BF0637 | possible cytosine deaminase                               | 139.4  | 120.8  | 124.2  | 142.4  | 120.3  | 146.9  | 1.06 | 5.3E-01 |
| BF0638 | hypothetical protein                                      | 501.2  | 473.8  | 407.5  | 164.3  | 176.6  | 151.6  | 0.36 | 1.1E-03 |
| BF0639 | putative phosphatidylserine synthase                      | 220.9  | 230.7  | 235.0  | 242.0  | 235.6  | 217.6  | 1.01 | 8.1E-01 |
| BF0640 | phosphatidylserine decarboxylase                          | 370.9  | 361.2  | 392.3  | 381.0  | 364.9  | 327.7  | 0.95 | 4.8E-01 |
| dnaE   | putative DNA polymerase III alpha subunit                 | 234.2  | 221.4  | 226.6  | 183.1  | 189.3  | 188.9  | 0.82 | 2.7E-03 |
| trxA   | putative thioredoxin                                      | 732.1  | 642.3  | 729.7  | 1262.0 | 1310.7 | 1061.9 | 1.72 | 6.9E-03 |
| BF0643 | hypothetical protein                                      | 1603.3 | 1507.6 | 1560.8 | 2215.9 | 2185.8 | 1966.8 | 1.36 | 5.9E-03 |
| BF0644 | putative transmembrane protein                            | 70.6   | 66.2   | 58.1   | 55.7   | 55.8   | 54.3   | 0.85 | 8.5E-02 |
| BF0647 | putative transmembrane protein                            | 147.7  | 139.0  | 124.1  | 99.0   | 89.7   | 110.4  | 0.73 | 3.1E-02 |
| BF0648 | putative transmembrane protein                            | 244.7  | 260.1  | 265.3  | 316.7  | 350.6  | 330.0  | 1.29 | 7.6E-03 |
| BF0649 | hypothetical protein                                      | 155.2  | 154.9  | 144.5  | 222.7  | 235.4  | 215.7  | 1.48 | 1.8E-03 |
| BF0650 | hypothetical protein                                      | 93.5   | 98.2   | 91.9   | 123.3  | 131.0  | 128.2  | 1.35 | 1.9E-03 |
| BF0651 | putative methanol denhydrogenase-related protein          | 176.6  | 177.9  | 162.6  | 220.4  | 212.9  | 196.7  | 1.22 | 2.4E-02 |
| BF0652 | putative transmembrane protein                            | 148.3  | 154.8  | 150.3  | 151.9  | 164.4  | 164.1  | 1.06 | 1.7E-01 |
| BF0653 | putative transmembrane protein                            | 165.3  | 155.6  | 173.3  | 161.2  | 162.9  | 161.7  | 0.98 | 6.9E-01 |
| BF0654 | putative ATP/GTP-binding transmembrane protein            | 260.1  | 215.4  | 219.3  | 329.3  | 317.6  | 339.8  | 1.42 | 1.3E-02 |
| BF0655 | putative ABC transporter membrane protein                 | 68.2   | 82.5   | 63.6   | 72.9   | 65.3   | 78.0   | 1.01 | 9.2E-01 |
| BF0656 | hypothetical protein                                      | 100.1  | 95.4   | 88.2   | 73.5   | 56.0   | 82.4   | 0.74 | 1.0E-01 |
| BF0657 | putative aminopeptidase                                   | 122.7  | 116.5  | 105.3  | 170.9  | 164.3  | 179.1  | 1.49 | 5.2E-03 |
| BF0658 | hypothetical protein                                      | 165.0  | 160.8  | 153.4  | 187.9  | 163.9  | 201.2  | 1.15 | 1.4E-01 |
| BF0659 | putative alpha-1,2-mannosidase precursor                  | 7.6    | 6.3    | 5.0    | 5.0    | 4.3    | 5.4    | 0.78 | 2.1E-01 |
| BF0660 | putative transmembrane protein                            | 130.7  | 136.3  | 115.7  | 110.4  | 107.0  | 128.1  | 0.90 | 3.0E-01 |
| BF0661 | putative outer membrane protein                           | 4.9    | 5.5    | 4.8    | 8.6    | 8.5    | 8.7    | 1.70 | 1.5E-03 |
| BF0662 | hypothetical protein                                      | 3.6    | 3.1    | 2.7    | 6.1    | 6.1    | 6.8    | 2.04 | 5.6E-03 |
| BF0663 | hypothetical protein                                      | 1.1    | 4.9    | 2.4    | 7.3    | 4.4    | 7.4    | 2.64 | 1.5E-01 |
| BF0664 | hypothetical protein                                      | 5.6    | 5.0    | 2.9    | 14.5   | 10.7   | 17.0   | 3.17 | 2.0E-02 |
| BF0665 | putative beta-galactosidase                               | 10.3   | 8.5    | 8.1    | 15.7   | 16.6   | 17.2   | 1.85 | 4.8E-03 |



|        |                                                             |        |        |        |        |        |        |      |         |
|--------|-------------------------------------------------------------|--------|--------|--------|--------|--------|--------|------|---------|
| aroA   | putative 3-phosphoshikimate 1-carboxyvinyltransferase       | 113.6  | 123.3  | 104.0  | 139.0  | 128.2  | 141.5  | 1.20 | 5.9E-02 |
| BF0667 | putative AraC-family regulatory protein                     | 406.5  | 324.6  | 368.2  | 561.1  | 634.3  | 604.6  | 1.64 | 7.8E-03 |
| BF0668 | putative histidine kinase                                   | 267.8  | 205.2  | 236.2  | 350.9  | 391.8  | 407.0  | 1.63 | 1.4E-02 |
| BF0669 | putative glycosyl hydrolase, beta-N-acetylhexosaminidase    | 103.5  | 111.8  | 114.6  | 283.2  | 281.9  | 266.3  | 2.52 | 2.1E-04 |
| BF0670 | putative transmembrane acyltransferase protein              | 75.3   | 71.0   | 64.2   | 36.9   | 39.0   | 35.1   | 0.53 | 1.7E-03 |
| BF110  | tRNA-Pro-GGG                                                | 13.6   | 7.2    | 10.0   | 2.1    | 2.6    | 17.4   | 0.46 | 4.0E-01 |
| BF0671 | hypothetical protein                                        | 58.4   | 60.7   | 63.8   | 105.2  | 87.7   | 78.7   | 1.48 | 2.5E-02 |
| aroB   | putative 3-dehydroquinase synthase                          | 128.4  | 121.2  | 125.3  | 176.1  | 175.2  | 168.0  | 1.38 | 9.0E-04 |
| BF0673 | putative transmembrane protein                              | 201.3  | 196.5  | 207.3  | 265.1  | 267.3  | 193.5  | 1.19 | 2.5E-01 |
| BF0674 | hypothetical protein                                        | 58.2   | 57.6   | 56.6   | 62.3   | 66.6   | 62.8   | 1.11 | 2.0E-02 |
| cls    | putative cardiolipin synthetase                             | 119.6  | 116.5  | 109.0  | 107.0  | 115.9  | 115.3  | 0.98 | 6.8E-01 |
| BF0676 | putative methyltransferase                                  | 117.0  | 102.6  | 134.3  | 139.4  | 113.6  | 126.2  | 1.07 | 5.7E-01 |
| BF0677 | hypothetical protein                                        | 191.3  | 205.9  | 227.5  | 275.6  | 287.5  | 297.5  | 1.38 | 1.1E-02 |
| BF0678 | hypothetical protein                                        | 1708.8 | 1693.6 | 1826.8 | 2709.0 | 2782.4 | 2302.6 | 1.49 | 9.7E-03 |
| BF0679 | putative ATP-dependent exodeoxyribonuclease                 | 33.7   | 29.6   | 34.1   | 41.4   | 44.8   | 39.0   | 1.29 | 2.9E-02 |
| BF0680 | conserved hypothetical lipoprotein                          | 8.3    | 9.4    | 9.9    | 43.8   | 39.9   | 38.8   | 4.44 | 2.5E-04 |
| BF0681 | putative outer membrane protein                             | 9.1    | 10.4   | 8.2    | 37.5   | 34.4   | 30.6   | 3.70 | 9.2E-04 |
| BF0682 | putative alpha-1,2-mannosidase precursor                    | 17.1   | 19.6   | 18.1   | 41.4   | 41.1   | 36.6   | 2.18 | 1.0E-03 |
| BF0683 | putative alpha-1,2-mannosidase precursor                    | 13.8   | 14.6   | 15.2   | 28.4   | 26.9   | 26.4   | 1.88 | 5.9E-04 |
| BF0684 | putative anti-sigma factor                                  | 129.3  | 119.9  | 119.4  | 135.9  | 120.7  | 134.5  | 1.06 | 3.4E-01 |
| BF0685 | putative RNA polymerase ECF-type sigma factor               | 103.0  | 98.4   | 93.5   | 164.2  | 127.0  | 149.8  | 1.49 | 1.8E-02 |
| BF0686 | putative alpha-1,2-mannosidase precursor                    | 94.3   | 96.4   | 88.0   | 123.0  | 116.6  | 112.8  | 1.26 | 9.4E-03 |
| BF0687 | putative efflux transporter bicyclomycin resistance protein | 0.4    | 0.6    | 1.0    | 0.8    | 1.7    | 0.9    | 1.65 | 2.6E-01 |
| BF0688 | putative AraC-family transcriptional regulator              | 28.3   | 25.7   | 28.9   | 25.2   | 25.8   | 23.8   | 0.90 | 1.2E-01 |
| alaS   | alanyl-tRNA synthetase                                      | 280.0  | 297.4  | 272.7  | 344.1  | 300.8  | 324.8  | 1.14 | 8.0E-02 |
| BF0690 | putative transmembrane peptidase                            | 280.2  | 283.4  | 266.1  | 250.9  | 236.8  | 237.2  | 0.87 | 1.8E-02 |
| BF0691 | putative transcriptional regulator protein                  | 422.3  | 379.5  | 329.1  | 266.4  | 247.3  | 274.3  | 0.70 | 2.3E-02 |
| BF0692 | putative RelA/SpoT GTP pyrophosphokinase                    | 295.6  | 296.9  | 287.8  | 371.0  | 388.3  | 378.5  | 1.29 | 7.4E-04 |
| BF0693 | putative lytic murein transglycosylase                      | 95.7   | 108.9  | 103.0  | 145.4  | 134.0  | 142.6  | 1.37 | 6.7E-03 |
| BF0694 | hypothetical protein                                        | 125.8  | 141.6  | 122.1  | 110.3  | 100.6  | 111.7  | 0.83 | 5.1E-02 |
| parB   | putative ParB-like chromosome partitioning protein          | 201.0  | 203.3  | 196.7  | 200.3  | 174.9  | 199.1  | 0.95 | 4.3E-01 |
| parA   | putative ParA chromosome partitioning protein               | 512.8  | 492.9  | 475.6  | 317.9  | 325.1  | 325.5  | 0.65 | 4.9E-04 |
| BF0697 | hypothetical protein                                        | 0.8    | 1.7    | 0.9    | 0.7    | 0.9    | 0.0    | 0.79 | 5.0E-01 |
| surE   | acid phosphatase                                            | 171.2  | 168.1  | 168.5  | 237.4  | 198.4  | 218.0  | 1.28 | 2.0E-02 |
| BF0699 | putative lipid-A-disaccharide synthase                      | 289.1  | 271.4  | 284.6  | 263.7  | 235.5  | 245.3  | 0.88 | 5.2E-02 |
| BF0700 | hypothetical protein                                        | 26.1   | 22.2   | 24.5   | 22.0   | 22.5   | 23.7   | 0.94 | 3.5E-01 |

|        |                                                                                 |       |       |       |        |        |        |      |         |
|--------|---------------------------------------------------------------------------------|-------|-------|-------|--------|--------|--------|------|---------|
| BF0701 | putative phosphatidate cytidyltransferase                                       | 519.5 | 552.1 | 560.0 | 318.1  | 342.4  | 325.7  | 0.60 | 7.2E-04 |
| BF0702 | putative transmembrane AAA-metalloprotease FtsH                                 | 535.6 | 545.9 | 513.6 | 399.7  | 392.6  | 408.6  | 0.75 | 1.2E-03 |
| BF0703 | hypothetical protein                                                            | 564.2 | 602.7 | 605.0 | 428.3  | 429.6  | 368.6  | 0.69 | 7.8E-03 |
| BFt11  | tRNA-Gln-CTG                                                                    | 9.5   | 7.6   | 2.6   | 0.0    | 5.5    | 2.3    | 0.62 | 5.5E-01 |
| BF0704 | hypothetical protein                                                            | 831.5 | 872.9 | 870.3 | 1176.5 | 1324.0 | 1089.2 | 1.39 | 1.3E-02 |
| BF0705 | putative transmembrane Mg <sup>2+</sup> transporter                             | 138.0 | 146.3 | 144.0 | 146.8  | 142.1  | 124.5  | 0.96 | 5.9E-01 |
| ksgA   | dimethyladenosine transferase                                                   | 257.2 | 281.4 | 268.8 | 267.1  | 252.7  | 263.1  | 0.97 | 4.5E-01 |
| BF0707 | putative transmembrane protein                                                  | 97.8  | 100.1 | 97.4  | 71.8   | 79.8   | 77.5   | 0.77 | 5.1E-03 |
| BF0708 | putative aminoacyl-histidine dipeptidase                                        | 360.4 | 352.1 | 370.9 | 582.0  | 612.9  | 553.3  | 1.61 | 9.2E-04 |
| BF0709 | hypothetical protein                                                            | 17.3  | 15.9  | 17.7  | 1.6    | 3.2    | 1.5    | 0.12 | 3.5E-03 |
| BF0710 | hypothetical protein                                                            | 0.8   | 1.0   | 0.8   | 2.9    | 2.3    | 1.0    | 2.22 | 1.1E-01 |
| BF0711 | putative TonB-dependent outer membrane receptor protein                         | 2.8   | 3.8   | 3.2   | 2.1    | 2.5    | 2.1    | 0.68 | 3.5E-02 |
| BF0712 | hypothetical protein                                                            | 46.4  | 49.4  | 37.5  | 22.6   | 25.1   | 24.2   | 0.54 | 7.3E-03 |
| BF0713 | hypothetical protein                                                            | 147.3 | 160.9 | 143.6 | 90.5   | 96.1   | 86.2   | 0.60 | 2.1E-03 |
| BF0714 | hypothetical protein                                                            | 38.2  | 48.1  | 56.5  | 50.0   | 58.2   | 51.6   | 1.13 | 4.4E-01 |
| BF0715 | hypothetical protein                                                            | 79.7  | 75.4  | 81.3  | 36.0   | 43.8   | 32.7   | 0.47 | 4.2E-03 |
| BF0716 | possible oxidoreductase                                                         | 25.6  | 27.2  | 23.8  | 15.1   | 19.2   | 12.4   | 0.60 | 3.6E-02 |
| BF0717 | hypothetical protein                                                            | 348.2 | 329.6 | 330.2 | 221.2  | 224.4  | 211.7  | 0.65 | 6.0E-04 |
| BF0718 | arginine/ornithine transport system ATPase                                      | 299.3 | 300.1 | 299.8 | 296.3  | 276.1  | 287.6  | 0.96 | 1.4E-01 |
| BF0719 | putative transmembrane permease                                                 | 89.5  | 78.5  | 82.1  | 46.7   | 53.9   | 45.1   | 0.58 | 4.7E-03 |
| BF0722 | putative transmembrane transport protein                                        | 100.5 | 113.2 | 109.6 | 76.7   | 90.2   | 73.9   | 0.74 | 2.8E-02 |
| BF0723 | putative AraC-family regulatory protein                                         | 102.2 | 104.6 | 110.2 | 139.0  | 145.6  | 116.4  | 1.26 | 5.6E-02 |
| BF0724 | possible HipA-like protein                                                      | 43.8  | 50.6  | 51.2  | 66.4   | 76.8   | 64.1   | 1.42 | 2.1E-02 |
| BF0726 | putative DNA-binding protein                                                    | 42.5  | 43.8  | 43.2  | 45.2   | 46.9   | 32.6   | 0.95 | 7.4E-01 |
| BF0727 | hypothetical protein                                                            | 7.4   | 4.2   | 5.6   | 6.0    | 4.5    | 4.8    | 0.91 | 6.8E-01 |
| BF0728 | hypothetical protein                                                            | 16.9  | 16.7  | 13.3  | 8.7    | 4.2    | 6.7    | 0.40 | 3.1E-02 |
| BF0729 | hypothetical protein                                                            | 30.6  | 27.6  | 26.9  | 5.8    | 8.8    | 8.1    | 0.26 | 2.6E-03 |
| BF0730 | hypothetical protein                                                            | 17.2  | 16.8  | 17.4  | 8.2    | 3.3    | 11.0   | 0.39 | 9.4E-02 |
| upgY   | putative transcriptional regulator                                              | 9.2   | 14.0  | 10.1  | 2.5    | 2.3    | 3.8    | 0.25 | 7.4E-03 |
| upgZ   | putative transcriptional regulator                                              | 10.8  | 10.4  | 13.5  | 6.5    | 7.1    | 6.6    | 0.59 | 9.8E-03 |
| BF0733 | putative capsular polysaccharide biosynthesis protein                           | 10.2  | 10.2  | 11.6  | 4.6    | 4.2    | 4.1    | 0.40 | 6.0E-04 |
| BF0734 | putative DegT/DnrJ/EryC1/StrS aminotransferase family O-antigen related protein | 11.5  | 12.2  | 12.7  | 6.9    | 7.4    | 4.2    | 0.49 | 3.5E-02 |
| BF0735 | putative capsular polysaccharide related hexapeptide transferase family protein | 12.7  | 8.6   | 14.7  | 5.8    | 3.7    | 5.6    | 0.42 | 3.1E-02 |
| BF0736 | putative sugar-phosphate nucleotidyl transferase                                | 6.9   | 10.8  | 14.2  | 6.5    | 6.0    | 5.1    | 0.57 | 1.1E-01 |
| BF0737 | putative polysaccharide transporter/flippase                                    | 5.8   | 4.9   | 6.3   | 1.8    | 2.8    | 1.5    | 0.35 | 1.5E-02 |
| BF0738 | possible glycosyltransferase protein                                            | 15.2  | 18.5  | 20.9  | 5.3    | 5.3    | 5.5    | 0.30 | 1.3E-03 |

|        |                                                               |       |       |       |       |       |       |      |         |
|--------|---------------------------------------------------------------|-------|-------|-------|-------|-------|-------|------|---------|
| BF0739 | possible O-antigen related transmembrane protein              | 5.3   | 7.3   | 5.8   | 1.8   | 2.2   | 2.3   | 0.35 | 3.8E-03 |
| BF0740 | possible glycosyltransferase                                  | 10.0  | 12.8  | 9.9   | 4.8   | 4.6   | 3.8   | 0.40 | 4.5E-03 |
| BF0741 | hypothetical protein                                          | 10.0  | 10.1  | 7.8   | 5.1   | 5.8   | 4.5   | 0.55 | 1.5E-02 |
| BF0742 | possible capsular polysaccharide related protein              | 8.2   | 6.2   | 7.3   | 2.9   | 3.3   | 2.0   | 0.38 | 1.3E-02 |
| BF0743 | putative UDP-ManNAc dehydrogenase                             | 16.3  | 12.1  | 11.9  | 5.0   | 6.4   | 7.7   | 0.47 | 2.2E-02 |
| BF0744 | putative UDP-GlcNAc 2-epimerase                               | 12.5  | 10.0  | 13.7  | 7.9   | 5.3   | 5.2   | 0.50 | 2.9E-02 |
| BF0746 | putative transposase_11 DDE family protein                    | 11.3  | 11.4  | 11.5  | 5.3   | 6.3   | 5.2   | 0.49 | 1.6E-03 |
| BF0747 | hypothetical protein                                          | 8.1   | 7.9   | 10.5  | 3.2   | 2.8   | 2.6   | 0.33 | 2.3E-03 |
| BF0748 | putative glycosyltransferase protein                          | 7.0   | 4.6   | 6.2   | 4.0   | 4.4   | 3.1   | 0.64 | 8.5E-02 |
| BF0749 | putative UDP-galactose phosphate transferase                  | 6.1   | 6.8   | 8.3   | 0.8   | 2.3   | 1.9   | 0.22 | 2.4E-02 |
| BF0750 | putative acetyltransferase                                    | 6.6   | 6.1   | 3.3   | 4.3   | 1.7   | 4.3   | 0.62 | 3.4E-01 |
| BF0751 | putative FIC family protein                                   | 141.9 | 139.5 | 145.7 | 111.8 | 113.5 | 97.1  | 0.75 | 1.3E-02 |
| BF0752 | putative DegT/DnrJ/EryC1/StrS family aminotransferase protein | 9.6   | 10.6  | 8.4   | 3.0   | 2.5   | 3.7   | 0.32 | 3.9E-03 |
| BF0753 | hypothetical protein                                          | 0.0   | 4.4   | 2.3   | 2.0   | 0.0   | 2.0   | 0.62 | 3.6E-01 |
| BF0754 | putative non-specific DNA binding protein                     | 5.5   | 2.7   | 2.8   | 4.2   | 3.0   | 2.1   | 0.85 | 6.8E-01 |
| BF0755 | hypothetical protein                                          | 0.0   | 2.0   | 0.0   | 1.8   | 0.0   | 0.0   | 0.89 |         |
| BF0756 | hypothetical protein                                          | 179.1 | 173.4 | 192.2 | 144.6 | 167.2 | 143.3 | 0.83 | 6.3E-02 |
| BF0757 | putative aldo/keto-reductase                                  | 57.2  | 56.0  | 64.6  | 68.8  | 77.3  | 63.9  | 1.18 | 1.2E-01 |
| BF0758 | putative glycosyl hydrolase                                   | 5.8   | 4.1   | 4.0   | 2.0   | 2.3   | 2.3   | 0.48 | 1.2E-02 |
| BF0759 | putative outer membrane protein                               | 8.7   | 11.5  | 9.7   | 6.3   | 6.1   | 5.2   | 0.59 | 1.6E-02 |
| BF0760 | putative outer membrane protein                               | 6.9   | 7.2   | 5.2   | 4.7   | 4.7   | 4.8   | 0.74 | 6.5E-02 |
| BF0761 | putative lipoprotein                                          | 16.1  | 15.8  | 16.5  | 9.1   | 12.7  | 13.2  | 0.71 | 7.8E-02 |
| BF0762 | hypothetical protein                                          | 4.7   | 3.7   | 5.4   | 3.0   | 3.5   | 3.0   | 0.70 | 7.8E-02 |
| BF0763 | putative secreted glucosidase                                 | 6.4   | 6.9   | 7.1   | 3.7   | 4.1   | 3.8   | 0.57 | 9.5E-04 |
| BF0764 | putative mannanase                                            | 10.4  | 8.9   | 11.8  | 3.4   | 3.1   | 3.3   | 0.32 | 1.2E-03 |
| BF0766 | putative beta-glucosidase                                     | 7.7   | 6.5   | 6.8   | 8.2   | 7.8   | 8.0   | 1.14 | 1.1E-01 |
| BF0767 | possible methyltransferase                                    | 14.2  | 12.0  | 9.0   | 11.9  | 12.9  | 17.1  | 1.20 | 4.3E-01 |
| BF0768 | putative B12-binding methyltransferase                        | 7.9   | 5.2   | 7.8   | 10.5  | 10.0  | 10.4  | 1.51 | 6.6E-02 |
| BF0769 | hypothetical protein                                          | 5.3   | 4.5   | 3.3   | 4.7   | 7.2   | 5.5   | 1.34 | 2.5E-01 |
| BF0770 | putative methylcobamide:CoM methyltransferase                 | 10.0  | 9.3   | 9.7   | 8.0   | 8.7   | 7.4   | 0.83 | 4.3E-02 |
| manA   | putative mannosidase                                          | 16.3  | 21.9  | 15.9  | 8.2   | 10.9  | 8.4   | 0.51 | 1.8E-02 |
| BF0772 | hypothetical protein                                          | 44.5  | 45.1  | 36.4  | 28.9  | 29.1  | 42.6  | 0.79 | 2.4E-01 |
| BF0773 | putative cation symporter                                     | 22.4  | 23.9  | 21.3  | 17.2  | 18.7  | 16.3  | 0.77 | 1.8E-02 |
| BF0774 | hypothetical protein                                          | 14.1  | 15.0  | 14.2  | 12.2  | 11.4  | 12.9  | 0.85 | 2.9E-02 |
| BF0775 | putative transmembrane protein                                | 19.6  | 21.2  | 16.4  | 32.2  | 30.3  | 36.3  | 1.73 | 1.1E-02 |
| BF0776 | hypothetical protein                                          | 13.8  | 14.3  | 15.3  | 50.4  | 48.0  | 57.6  | 3.59 | 3.8E-04 |
| BF0777 | possible endoribonuclease                                     | 24.0  | 24.2  | 21.1  | 84.4  | 60.5  | 131.1 | 3.79 | 1.2E-02 |
| BF0778 | hypothetical protein                                          | 13.7  | 11.3  | 16.2  | 11.5  | 16.4  | 16.5  | 1.08 | 7.2E-01 |
| BF0779 | hypothetical protein                                          | 1.1   | 1.2   | 0.2   | 1.2   | 0.0   | 1.4   | 2.10 | 4.0E-01 |
| BF0780 | hypothetical protein                                          | 0.0   | 0.0   | 0.0   | 0.3   | 0.3   | 0.1   |      |         |
| BF0781 | putative TonB-dependent receptor protein                      | 0.1   | 0.1   | 0.1   | 0.2   | 0.0   | 0.1   | 1.24 | 7.8E-01 |
| BF0782 | putative two-component system sensor histidine kinase         | 34.7  | 31.3  | 31.5  | 24.2  | 24.5  | 28.5  | 0.79 | 3.7E-02 |

|        |                                                                                                                                |       |       |       |       |       |       |      |         |
|--------|--------------------------------------------------------------------------------------------------------------------------------|-------|-------|-------|-------|-------|-------|------|---------|
| nuoN   | putative NADH dehydrogenase chain N                                                                                            | 101.8 | 139.7 | 131.1 | 88.2  | 92.7  | 83.0  | 0.71 | 5.3E-02 |
| nuoM   | putative NADH-ubiquinone oxidoreductase subunit                                                                                | 75.6  | 113.2 | 89.8  | 77.3  | 71.5  | 70.1  | 0.80 | 1.9E-01 |
| nuoL   | putative NADH dehydrogenase chain L                                                                                            | 85.1  | 116.2 | 96.6  | 75.5  | 66.8  | 67.7  | 0.71 | 4.6E-02 |
| nuoK   | putative NADH dehydrogenase chain K                                                                                            | 56.0  | 79.4  | 71.6  | 45.6  | 43.2  | 40.7  | 0.63 | 2.8E-02 |
| nuoJ   | putative NADH dehydrogenase chain J                                                                                            | 79.5  | 97.3  | 81.1  | 70.1  | 53.8  | 52.1  | 0.68 | 5.0E-02 |
| nuoI   | putative NADH dehydrogenase I subunit I                                                                                        | 87.9  | 115.0 | 91.5  | 61.3  | 57.0  | 54.7  | 0.59 | 1.2E-02 |
| nuoH   | putative NADH dehydrogenase subunit H                                                                                          | 102.6 | 116.8 | 108.6 | 78.7  | 79.1  | 81.3  | 0.73 | 4.6E-03 |
| nuoC   | putative NADH-quinone oxidoreductase chain C/D                                                                                 | 115.1 | 108.5 | 111.4 | 95.0  | 84.0  | 100.5 | 0.83 | 5.4E-02 |
| nuoB   | NADH-quinone oxidoreductase chain B                                                                                            | 58.8  | 61.9  | 64.1  | 77.8  | 70.9  | 79.3  | 1.23 | 1.9E-02 |
| nuoA   | NADH-quinone oxidoreductase chain A                                                                                            | 93.5  | 105.9 | 96.9  | 111.5 | 105.3 | 92.1  | 1.04 | 6.5E-01 |
| BF0793 | hypothetical protein                                                                                                           | 483.6 | 476.7 | 485.2 | 166.4 | 199.4 | 261.5 | 0.43 | 8.6E-03 |
| BF0794 | putative potassium uptake protein                                                                                              | 78.3  | 76.8  | 77.9  | 94.7  | 81.7  | 100.3 | 1.18 | 8.3E-02 |
| BF0795 | putative potassium uptake protein                                                                                              | 113.8 | 113.1 | 105.2 | 152.6 | 141.2 | 148.6 | 1.33 | 4.2E-03 |
| dxs    | 1-deoxy-D-xylulose-5-phosphate synthase                                                                                        | 298.7 | 331.6 | 276.1 | 300.7 | 260.6 | 327.6 | 0.98 | 8.5E-01 |
| BF0799 | hypothetical protein                                                                                                           | 69.5  | 74.0  | 58.8  | 74.3  | 78.7  | 76.3  | 1.14 | 1.9E-01 |
| BF0800 | putative transmembrane protein                                                                                                 | 162.2 | 151.7 | 143.3 | 158.8 | 185.0 | 145.3 | 1.07 | 5.4E-01 |
| BF0801 | putative phosphoglycolate phosphatase                                                                                          | 189.3 | 177.3 | 172.7 | 182.7 | 164.3 | 178.7 | 0.97 | 6.4E-01 |
| BF0802 | putative secreted sulfatase                                                                                                    | 8.3   | 7.5   | 8.1   | 10.8  | 9.8   | 9.6   | 1.27 | 2.0E-02 |
| BF0803 | possible alpha-galactosidase                                                                                                   | 2.6   | 2.7   | 2.6   | 3.0   | 3.6   | 3.5   | 1.27 | 3.7E-02 |
| BF0804 | hypothetical protein                                                                                                           | 3.2   | 4.3   | 3.7   | 3.1   | 5.0   | 3.9   | 1.07 | 7.5E-01 |
| BF0805 | putative sulfatase                                                                                                             | 7.8   | 8.5   | 6.7   | 5.9   | 4.5   | 7.8   | 0.77 | 2.8E-01 |
| BF0806 | hypothetical protein                                                                                                           | 0.6   | 0.5   | 0.6   | 0.3   | 0.4   | 0.5   | 0.68 | 2.1E-01 |
| BF0807 | putative outer membrane protein                                                                                                | 1.0   | 1.0   | 0.9   | 0.5   | 0.8   | 0.5   | 0.60 | 4.6E-02 |
| BF0808 | putative two-component system sensor histidine kinase/response regulator fusion protein                                        | 32.5  | 30.6  | 33.3  | 29.7  | 34.9  | 30.1  | 0.98 | 8.0E-01 |
| BF0809 | putative hexuronate transporter                                                                                                | 12.9  | 17.6  | 14.3  | 14.4  | 15.8  | 23.6  | 1.18 | 4.7E-01 |
| BF0810 | putative alpha-L-fucosidase                                                                                                    | 174.1 | 182.0 | 170.4 | 273.2 | 295.8 | 281.1 | 1.61 | 7.2E-04 |
| BF0811 | hypothetical protein                                                                                                           | 271.2 | 255.5 | 265.9 | 305.1 | 331.0 | 303.3 | 1.18 | 1.7E-02 |
| BF0812 | hypothetical protein                                                                                                           | 41.7  | 45.6  | 41.4  | 57.1  | 51.7  | 58.5  | 1.30 | 1.4E-02 |
| BF0813 | putative transmembrane acyltransferase                                                                                         | 77.1  | 78.6  | 83.6  | 43.7  | 58.3  | 38.9  | 0.58 | 2.5E-02 |
| BF0814 | putative Sec-independent protein translocase component                                                                         | 15.5  | 11.8  | 12.5  | 30.1  | 35.2  | 30.0  | 2.40 | 3.7E-03 |
| BF0815 | putative Sec-independent protein translocase component                                                                         | 99.1  | 92.2  | 89.5  | 112.2 | 113.8 | 111.4 | 1.20 | 1.1E-02 |
| BF0816 | putative alanine racemase and UDP-N-acetylmuramoylalanyl-D-glutamyl, 6-diaminopimelate-D-alanyl-D-alanyl ligase fusion protein | 184.6 | 189.1 | 181.7 | 201.4 | 187.4 | 174.9 | 1.01 | 8.1E-01 |
| BF0817 | hypothetical protein                                                                                                           | 26.5  | 30.8  | 34.3  | 36.9  | 29.6  | 31.7  | 1.08 | 5.8E-01 |
| BF0818 | hypothetical protein                                                                                                           | 43.0  | 41.4  | 45.3  | 16.7  | 14.7  | 22.1  | 0.41 | 6.3E-03 |
| BF0820 | putative regulatory protein                                                                                                    | 165.4 | 168.7 | 146.0 | 80.0  | 89.3  | 86.0  | 0.53 | 1.8E-03 |
| BF0821 | hypothetical protein                                                                                                           | 94.8  | 94.3  | 91.2  | 71.5  | 78.6  | 71.3  | 0.79 | 7.0E-03 |
| BF0822 | hypothetical protein                                                                                                           | 28.4  | 34.5  | 33.5  | 34.6  | 32.9  | 34.1  | 1.06 | 5.0E-01 |

|        |                                                                     |       |       |       |        |        |       |      |         |
|--------|---------------------------------------------------------------------|-------|-------|-------|--------|--------|-------|------|---------|
| BF0823 | putative transmembrane protein                                      | 70.9  | 63.0  | 68.8  | 47.6   | 50.4   | 55.1  | 0.75 | 1.7E-02 |
| BF0824 | hypothetical protein                                                | 17.6  | 16.4  | 20.7  | 32.0   | 33.2   | 31.1  | 1.77 | 4.6E-03 |
| miaA   | tRNA delta(2)-isopentenylpyrophosphate transferase                  | 75.6  | 75.2  | 82.4  | 108.4  | 98.3   | 96.0  | 1.30 | 1.4E-02 |
| BF0826 | hypothetical protein                                                | 865.4 | 828.3 | 843.7 | 1004.9 | 983.1  | 898.3 | 1.14 | 4.6E-02 |
| lpxA   | UDP-N-acetylglucosamine acyltransferase                             | 496.7 | 522.3 | 518.9 | 578.4  | 550.1  | 518.0 | 1.07 | 1.8E-01 |
| lpxC   | UDP-3-O-[3-hydroxymyristoyl] N-acetylglucosamine deacetylase        | 441.9 | 489.3 | 474.4 | 546.4  | 508.5  | 494.5 | 1.10 | 1.3E-01 |
| lpxD   | putative UDP-3-O-[3-hydroxymyristoyl] glucosamine N-acyltransferase | 394.3 | 407.1 | 391.2 | 380.3  | 366.0  | 372.7 | 0.94 | 3.5E-02 |
| BF0830 | hypothetical protein                                                | 176.9 | 198.4 | 190.4 | 219.4  | 208.1  | 182.1 | 1.08 | 3.9E-01 |
| BF0831 | putative orotidine 5'-phosphate decarboxylase                       | 450.0 | 503.9 | 480.2 | 488.5  | 484.6  | 443.4 | 0.99 | 8.4E-01 |
| prfA   | peptide chain release factor 1                                      | 254.9 | 229.5 | 219.1 | 248.7  | 225.6  | 245.2 | 1.02 | 7.4E-01 |
| BF0833 | possible phosphoribosylformylglycinamide cyclo-ligase               | 278.2 | 276.8 | 263.1 | 270.0  | 254.9  | 267.6 | 0.97 | 3.5E-01 |
| BF0834 | hypothetical protein                                                | 8.3   | 10.4  | 12.5  | 5.0    | 1.7    | 4.3   | 0.33 | 5.8E-02 |
| BF0835 | putative LemA family protein                                        | 203.4 | 170.3 | 181.6 | 144.0  | 139.4  | 141.4 | 0.77 | 1.7E-02 |
| BF0836 | hypothetical protein                                                | 139.9 | 133.7 | 137.3 | 88.6   | 84.1   | 103.3 | 0.67 | 9.0E-03 |
| BF0837 | hypothetical protein                                                | 216.2 | 209.4 | 207.4 | 122.4  | 123.5  | 125.1 | 0.59 | 6.5E-05 |
| aroE   | putative shikimate 5-dehydrogenase                                  | 181.4 | 170.3 | 175.8 | 215.1  | 209.0  | 180.0 | 1.14 | 1.3E-01 |
| ubiE   | ubiquinone/menaquinone biosynthesis methyltransferase               | 144.4 | 145.2 | 162.2 | 218.7  | 217.9  | 203.0 | 1.42 | 5.3E-03 |
| hemH   | phosphoribosylaminoimidazole-succinocarboxamide synthase            | 346.4 | 347.0 | 394.8 | 657.6  | 637.1  | 591.8 | 1.74 | 2.3E-03 |
| BF0841 | putative phosphate starvation-inducible PhoH-like protein           | 177.1 | 176.8 | 180.9 | 219.0  | 214.2  | 192.6 | 1.17 | 3.5E-02 |
| BF0842 | hypothetical protein                                                | 135.5 | 100.0 | 110.1 | 126.0  | 116.4  | 122.5 | 1.06 | 6.1E-01 |
| BF0843 | hypothetical protein                                                | 219.6 | 207.5 | 211.2 | 302.3  | 301.3  | 277.7 | 1.38 | 2.6E-03 |
| BF0844 | putative transmembrane protein                                      | 126.5 | 134.5 | 132.7 | 168.9  | 196.5  | 131.9 | 1.25 | 1.9E-01 |
| BF0845 | conserved hypothetical protein, possible ATP/GTP-binding site       | 92.6  | 95.4  | 98.3  | 147.4  | 142.9  | 150.6 | 1.54 | 4.8E-04 |
| BF0846 | hypothetical protein                                                | 96.2  | 103.4 | 101.4 | 185.2  | 190.5  | 171.5 | 1.82 | 7.3E-04 |
| truA   | putative tRNA pseudouridine synthase A                              | 21.9  | 23.7  | 27.4  | 25.3   | 24.5   | 27.2  | 1.06 | 5.5E-01 |
| BF0848 | putative transmembrane protein                                      | 16.1  | 15.8  | 14.5  | 16.7   | 13.8   | 16.2  | 1.01 | 9.5E-01 |
| BF0849 | hypothetical protein                                                | 198.3 | 181.1 | 180.9 | 160.6  | 172.7  | 142.1 | 0.85 | 9.7E-02 |
| BF0850 | putative desulfatase                                                | 97.7  | 102.1 | 88.0  | 378.7  | 343.1  | 325.8 | 3.64 | 3.7E-04 |
| BF0851 | putative beta-galactosidase                                         | 44.5  | 50.0  | 42.2  | 156.6  | 139.6  | 139.7 | 3.19 | 4.9E-04 |
| BF0852 | putative transmembrane protein                                      | 46.7  | 54.1  | 46.0  | 162.4  | 158.4  | 142.3 | 3.16 | 5.7E-04 |
| BF0853 | putative GFO/IDH/MOCA family oxidoreductase                         | 286.1 | 309.7 | 286.2 | 1141.0 | 1051.3 | 914.6 | 3.51 | 5.2E-04 |
| BF0854 | hypothetical protein                                                | 35.4  | 32.4  | 25.8  | 81.9   | 74.7   | 104.7 | 2.79 | 5.9E-03 |
| BF0855 | hypothetical protein                                                | 4.0   | 6.5   | 5.4   | 16.7   | 14.0   | 14.9  | 2.92 | 7.1E-03 |
| BF0856 | putative beta-glucuronidase                                         | 10.8  | 9.3   | 9.3   | 12.2   | 12.8   | 12.9  | 1.30 | 1.7E-02 |
| BF0857 | putative TPR-domain protein                                         | 2.1   | 2.4   | 1.6   | 5.3    | 4.6    | 4.8   | 2.44 | 6.8E-03 |
| BF0858 | putative sugar-proton symporter                                     | 1.4   | 1.4   | 1.4   | 4.5    | 4.4    | 3.2   | 2.87 | 3.1E-03 |
| BF0859 | putative AraC transcriptional regulatory protein                    | 64.3  | 60.3  | 50.7  | 32.3   | 35.8   | 40.2  | 0.62 | 1.7E-02 |

|        |                                                              |        |        |        |         |         |        |       |         |
|--------|--------------------------------------------------------------|--------|--------|--------|---------|---------|--------|-------|---------|
| BF0860 | putative beta-glucosidase                                    | 7.5    | 6.8    | 6.4    | 60.0    | 55.7    | 50.5   | 8.03  | 1.1E-04 |
| BF0861 | putative cytochrome c binding protein                        | 2.0    | 2.1    | 3.1    | 32.5    | 29.9    | 38.8   | 14.33 | 6.7E-04 |
| BF0862 | putative transmembrane protein                               | 1.6    | 1.1    | 1.5    | 26.8    | 24.3    | 21.6   | 17.29 | 3.4E-04 |
| BF0863 | putative outer membrane protein                              | 8.3    | 8.6    | 8.4    | 387.1   | 373.0   | 331.9  | 43.06 | 4.6E-06 |
| BF0864 | hypothetical protein                                         | 6.1    | 9.2    | 8.8    | 405.0   | 390.8   | 300.2  | 45.88 | 2.6E-04 |
| BF0865 | hypothetical protein                                         | 6.0    | 6.0    | 5.7    | 19.9    | 18.3    | 16.7   | 3.10  | 3.4E-04 |
| BF0866 | putative outer membrane protein                              | 2.6    | 2.5    | 3.5    | 17.9    | 18.3    | 15.4   | 6.02  | 8.7E-04 |
| BF0867 | possible outer membrane protein                              | 4.8    | 3.6    | 6.2    | 16.1    | 18.8    | 13.3   | 3.36  | 8.2E-03 |
| BF0868 | putative TonB-linked outer membrane protein                  | 4.2    | 3.5    | 4.5    | 12.0    | 15.0    | 10.5   | 3.08  | 4.0E-03 |
| BF0869 | putative RNA polymerase ECF-type sigma factor                | 212.5  | 194.9  | 204.9  | 186.1   | 234.8   | 206.9  | 1.02  | 8.2E-01 |
| BF0870 | putative anti-sigma factor                                   | 77.4   | 74.0   | 84.1   | 155.9   | 159.4   | 160.2  | 2.02  | 4.9E-04 |
| BF0871 | hypothetical protein                                         | 22.2   | 26.2   | 29.2   | 196.7   | 210.9   | 163.1  | 7.35  | 5.3E-04 |
| BF0872 | possible outer membrane protein                              | 35.6   | 34.2   | 37.0   | 174.0   | 195.7   | 146.3  | 4.80  | 5.3E-04 |
| BF0873 | hypothetical protein                                         | 3.3    | 2.0    | 4.0    | 4.3     | 5.0     | 5.1    | 1.60  | 1.3E-01 |
| BF0874 | putative GFO/IDH/MOCA family oxidoreductase                  | 34.8   | 26.0   | 30.6   | 39.4    | 33.9    | 37.4   | 1.22  | 1.6E-01 |
| BFt12  | tRNA-Gly-TCC                                                 | 297.2  | 261.8  | 301.7  | 400.5   | 360.2   | 730.6  | 1.65  | 1.3E-01 |
| BFt13  | tRNA-Tyr-GTA                                                 | 41.7   | 72.0   | 71.7   | 196.7   | 176.7   | 355.2  | 3.86  | 2.0E-02 |
| ribH   | riboflavin synthase subunit beta                             | 149.0  | 131.2  | 155.0  | 216.2   | 219.1   | 194.6  | 1.45  | 1.1E-02 |
| BF0876 | hypothetical protein                                         | 736.3  | 729.1  | 775.5  | 991.7   | 920.5   | 879.1  | 1.24  | 1.4E-02 |
| BF0877 | putative DNA replication and repair protein                  | 105.4  | 65.9   | 85.2   | 67.6    | 75.3    | 83.5   | 0.90  | 5.7E-01 |
| BF0878 | hypothetical protein                                         | 57.6   | 54.2   | 50.7   | 54.6    | 54.1    | 69.2   | 1.09  | 4.6E-01 |
| BF0879 | putative histidinol-phosphatase                              | 70.2   | 72.3   | 68.5   | 53.4    | 56.4    | 50.2   | 0.76  | 5.9E-03 |
| BF0880 | putative 5-formyltetrahydrofolate cyclo-ligase               | 106.4  | 101.3  | 84.4   | 97.6    | 88.7    | 95.4   | 0.97  | 7.5E-01 |
| BF0881 | putative carboxy-terminal protease                           | 241.6  | 228.7  | 226.2  | 179.5   | 175.0   | 183.2  | 0.77  | 2.2E-03 |
| BF0882 | putative deoxycytidylate deaminase                           | 305.8  | 305.1  | 296.8  | 193.6   | 214.6   | 195.2  | 0.66  | 1.6E-03 |
| BF0883 | hypothetical protein                                         | 355.7  | 352.9  | 362.7  | 249.2   | 242.7   | 229.0  | 0.67  | 8.2E-04 |
| dcp    | putative peptidyl-dipeptidase                                | 290.3  | 305.8  | 286.6  | 186.2   | 167.4   | 170.8  | 0.59  | 1.1E-03 |
| gap    | putative glyceraldehyde 3-phosphate dehydrogenase            | 5806.7 | 6112.6 | 6690.8 | 10183.9 | 10646.9 | 9790.0 | 1.65  | 2.3E-03 |
| mscL   | putative large-conductance mechanosensitive channel          | 119.6  | 107.7  | 104.4  | 108.5   | 102.4   | 103.3  | 0.95  | 3.7E-01 |
| guaA   | bifunctional GMP synthase/glutamine amidotransferase protein | 599.4  | 613.6  | 577.6  | 667.0   | 615.7   | 644.0  | 1.08  | 1.0E-01 |
| BF0888 | hypothetical protein                                         | 35.3   | 15.6   | 29.1   | 25.1    | 13.6    | 18.3   | 0.73  | 4.3E-01 |
| BF0889 | hypothetical protein                                         | 6.6    | 6.0    | 6.2    | 15.7    | 16.1    | 13.0   | 2.37  | 1.6E-03 |
| BF0890 | putative outer membrane receptor protein                     | 4.5    | 4.2    | 4.5    | 16.5    | 14.2    | 15.1   | 3.46  | 1.9E-04 |
| BF0892 | hypothetical protein                                         | 2.3    | 3.4    | 3.0    | 1.9     | 1.7     | 1.3    | 0.56  | 3.7E-02 |
| BF0893 | putative outer membrane receptor protein                     | 0.7    | 1.0    | 1.7    | 1.4     | 1.1     | 1.1    | 1.10  | 7.9E-01 |
| BF0894 | putative enoyl-[acyl-carrier-protein] reductase [NADH]       | 831.3  | 851.6  | 890.4  | 781.0   | 814.1   | 785.6  | 0.93  | 5.6E-02 |
| BF0895 | hypothetical protein                                         | 729.1  | 779.8  | 798.5  | 828.9   | 881.6   | 782.3  | 1.08  | 2.1E-01 |
| BF0896 | hypothetical protein                                         | 99.6   | 104.1  | 110.9  | 121.0   | 121.7   | 129.4  | 1.18  | 2.4E-02 |
| BF0897 | putative transmembrane protein                               | 233.7  | 233.8  | 217.9  | 107.9   | 108.3   | 99.5   | 0.46  | 3.3E-04 |
| BF0898 | lipoyl synthase                                              | 52.9   | 55.2   | 52.4   | 82.0    | 78.2    | 76.0   | 1.47  | 9.7E-04 |

|        |                                                               |        |        |        |        |        |        |      |         |
|--------|---------------------------------------------------------------|--------|--------|--------|--------|--------|--------|------|---------|
| BF0899 | putative dipeptidyl peptidase                                 | 157.1  | 163.9  | 149.0  | 248.1  | 233.5  | 213.9  | 1.48 | 5.5E-03 |
| BF0901 | putative transmembrane protein                                | 15.0   | 12.1   | 11.2   | 17.4   | 16.8   | 18.6   | 1.39 | 4.4E-02 |
| BF0902 | putative transmembrane and transcriptional regulatory protein | 29.9   | 31.2   | 36.2   | 37.3   | 34.7   | 34.9   | 1.10 | 2.6E-01 |
| BF0903 | hypothetical protein                                          | 208.1  | 209.1  | 194.5  | 179.2  | 182.9  | 215.2  | 0.94 | 4.6E-01 |
| BF0904 | putative flavoprotein                                         | 555.8  | 523.5  | 562.2  | 747.3  | 695.6  | 667.4  | 1.28 | 9.3E-03 |
| nagB   | glucosamine-6-phosphate deaminase                             | 1148.4 | 1163.8 | 1175.1 | 2147.5 | 2252.7 | 1987.6 | 1.83 | 6.7E-04 |
| BF0906 | hypothetical protein                                          | 1576.9 | 1462.3 | 1481.0 | 569.2  | 607.6  | 485.6  | 0.37 | 9.6E-04 |
| BF0907 | putative Sua5/yciO/yrdC family protein                        | 92.1   | 103.5  | 89.1   | 99.3   | 91.3   | 93.6   | 1.00 | 1.0E+00 |
| BF0908 | putative outer membrane protein                               | 134.6  | 132.5  | 125.0  | 125.3  | 120.2  | 109.6  | 0.90 | 1.4E-01 |
| BF0909 | putative helicase protein                                     | 72.0   | 71.4   | 65.6   | 87.6   | 74.0   | 76.1   | 1.13 | 1.5E-01 |
| BF0910 | putative haloacid dehalogenase-like hydrolase                 | 159.4  | 162.1  | 152.5  | 158.7  | 146.1  | 137.8  | 0.93 | 2.6E-01 |
| BF0911 | putative aminotransferase                                     | 107.2  | 88.7   | 89.7   | 99.9   | 98.3   | 113.4  | 1.09 | 3.8E-01 |
| BF0912 | putative O-acetylhomoserine synthase                          | 123.1  | 111.9  | 115.1  | 107.2  | 100.5  | 101.5  | 0.88 | 4.3E-02 |
| BF0913 | putative RNA polymerase ECF-type sigma factor                 | 94.6   | 90.3   | 87.8   | 33.0   | 37.2   | 48.0   | 0.43 | 5.6E-03 |
| BF0914 | putative anti-sigma factor                                    | 159.6  | 158.5  | 162.0  | 108.2  | 106.3  | 115.6  | 0.69 | 9.6E-04 |
| BF0915 | putative outer membrane protein                               | 100.2  | 93.6   | 87.1   | 103.0  | 111.8  | 100.8  | 1.12 | 1.3E-01 |
| BF0916 | putative FNR-like protein                                     | 346.7  | 327.6  | 321.6  | 324.7  | 328.5  | 290.3  | 0.95 | 3.6E-01 |
| BF0917 | putative transmembrane protein                                | 54.4   | 39.6   | 52.4   | 33.6   | 45.9   | 34.6   | 0.78 | 2.1E-01 |
| BF0918 | putative transmembrane protein                                | 21.1   | 22.4   | 20.1   | 17.3   | 15.4   | 17.2   | 0.78 | 1.9E-02 |
| BF0919 | hypothetical protein                                          | 477.2  | 508.6  | 514.3  | 809.1  | 925.9  | 743.9  | 1.65 | 6.0E-03 |
| BF0920 | putative glycosyl transferase                                 | 184.5  | 184.3  | 211.2  | 425.9  | 459.1  | 401.2  | 2.22 | 1.1E-03 |
| BF0921 | putative glycosyl hydrolase                                   | 257.6  | 268.0  | 295.6  | 780.3  | 855.8  | 698.1  | 2.84 | 9.0E-04 |
| BF0922 | hypothetical protein                                          | 935.3  | 1011.6 | 997.6  | 721.7  | 740.8  | 619.7  | 0.71 | 1.2E-02 |
| BF0923 | possible glycogen synthase                                    | 944.1  | 965.5  | 1008.8 | 786.5  | 793.6  | 624.8  | 0.75 | 4.4E-02 |
| panC   | putative pantoate--beta-alanine ligase                        | 118.5  | 114.7  | 121.1  | 153.6  | 149.9  | 145.8  | 1.27 | 2.0E-03 |
| panD   | aspartate 1-decarboxylase precursor                           | 284.6  | 302.7  | 298.6  | 279.7  | 284.5  | 256.8  | 0.93 | 1.5E-01 |
| BF0926 | putative NADPH-dependent glutamate synthase                   | 199.9  | 204.7  | 189.1  | 242.3  | 204.6  | 235.5  | 1.15 | 1.2E-01 |
| BF0927 | putative sugar transporter                                    | 60.0   | 63.6   | 65.4   | 87.6   | 89.5   | 76.5   | 1.34 | 1.5E-02 |
| serS   | seryl-tRNA synthetase                                         | 411.2  | 419.2  | 416.9  | 500.7  | 474.3  | 430.2  | 1.12 | 9.4E-02 |
| rpmA   | 50S ribosomal protein L27                                     | 3233.0 | 3003.7 | 3344.9 | 2947.7 | 2926.6 | 3079.0 | 0.94 | 1.9E-01 |
| BF0930 | putative 50S ribosomal protein L21                            | 3055.7 | 2925.1 | 3240.2 | 3054.4 | 3052.8 | 3210.9 | 1.01 | 8.0E-01 |
| BF0931 | putative haloacid dehalogenase-like hydrolase                 | 41.9   | 49.1   | 49.1   | 119.7  | 114.8  | 109.3  | 2.46 | 7.8E-04 |
| BF0932 | putative lipoprotein                                          | 46.5   | 40.4   | 44.1   | 91.7   | 77.6   | 89.6   | 1.98 | 2.4E-03 |
| BF0933 | putative ATP-binding component of ABC transporter protein     | 74.0   | 69.7   | 67.2   | 140.8  | 143.4  | 113.3  | 1.88 | 5.2E-03 |
| BF0934 | putative transmembrane protein                                | 62.6   | 72.3   | 71.5   | 131.5  | 142.5  | 114.5  | 1.88 | 4.8E-03 |
| BF0935 | putative zinc protease                                        | 264.6  | 271.6  | 252.5  | 485.2  | 471.4  | 396.3  | 1.71 | 4.8E-03 |
| kdsA   | 2-dehydro-3-deoxyphosphoactonate aldolase                     | 160.4  | 177.9  | 168.4  | 230.7  | 231.0  | 225.5  | 1.36 | 2.7E-03 |
| BF0937 | hypothetical protein                                          | 184.8  | 170.1  | 188.2  | 219.4  | 196.8  | 199.6  | 1.13 | 8.7E-02 |
| BF0938 | tRNA delta(2)-isopentenylpyrophosphate transferase            | 137.4  | 138.4  | 133.3  | 139.5  | 138.6  | 154.2  | 1.06 | 2.7E-01 |
| BF0939 | putative ATP/GTP-binding transmembrane protein                | 143.4  | 159.2  | 154.3  | 128.5  | 131.8  | 121.6  | 0.84 | 2.3E-02 |
| BF0940 | putative ATP-binding component of ABC transporter             | 247.0  | 254.3  | 249.7  | 218.6  | 236.6  | 213.6  | 0.89 | 4.1E-02 |

|               |                                                                        |            |            |            |               |               |               |               |                |
|---------------|------------------------------------------------------------------------|------------|------------|------------|---------------|---------------|---------------|---------------|----------------|
| BF0941        | hypothetical protein                                                   | 384.6      | 400.7      | 420.5      | 367.5         | 351.4         | 298.1         | 0.84          | 1.0E-01        |
| BF0942        | hypothetical protein                                                   | 163.9      | 173.8      | 173.5      | 127.2         | 120.2         | 147.4         | 0.77          | 3.0E-02        |
| BF0943        | hypothetical protein                                                   | 186.0      | 200.5      | 182.4      | 132.3         | 120.1         | 142.8         | 0.69          | 9.2E-03        |
| BF0944        | putative nucleoside/H+ permease                                        | 179.1      | 189.3      | 169.2      | 191.3         | 197.6         | 184.1         | 1.07          | 2.3E-01        |
| BF0946        | hypothetical protein                                                   | 84.3       | 56.9       | 70.8       | 38.7          | 57.0          | 45.8          | 0.67          | 1.0E-01        |
| BF0947        | hypothetical protein                                                   | 294.8      | 307.2      | 305.0      | 262.7         | 252.8         | 239.1         | 0.83          | 1.0E-02        |
| BF0948        | putative 3'-5' exonuclease                                             | 246.1      | 265.2      | 251.0      | 236.3         | 252.0         | 218.4         | 0.93          | 2.4E-01        |
| BF0949        | conserved hypothetical protein, possible C-terminal metal binding site | 306.9      | 299.2      | 317.7      | 271.6         | 255.4         | 227.3         | 0.81          | 3.9E-02        |
| BF0950        | putative FtsK/SpoIIIE-like protein                                     | 275.0      | 293.7      | 286.1      | 233.4         | 234.6         | 214.8         | 0.80          | 8.3E-03        |
| BF0951        | hypothetical protein                                                   | 550.8      | 585.6      | 543.8      | 245.3         | 248.5         | 279.3         | 0.46          | 6.4E-04        |
| trxB          | putative thioredoxin reductase                                         | 1096.7     | 1143.7     | 1173.6     | 919.3         | 848.0         | 952.5         | 0.80          | 1.2E-02        |
| BF0953        | putative beta-N-acetylhexosaminidase                                   | 92.5       | 93.4       | 92.6       | 266.3         | 252.6         | 248.5         | 2.75          | 3.0E-05        |
| BF0954        | putative FNR-family transcriptional regulator protein                  | 382.1      | 397.0      | 357.9      | 388.3         | 380.4         | 306.0         | 0.94          | 5.7E-01        |
| glnA          | glutamine synthetase                                                   | 220.0      | 238.4      | 222.6      | 145.8         | 148.0         | 135.7         | 0.63          | 1.4E-03        |
| BF0957        | hypothetical protein                                                   | 138.3      | 119.8      | 132.4      | 64.7          | 81.1          | 70.6          | 0.55          | 5.6E-03        |
| BF0958        | putative reverse transcriptase                                         | 45.5       | 44.2       | 40.0       | 38.0          | 39.1          | 41.4          | 0.91          | 1.8E-01        |
| rpsA          | putative 30S ribosomal protein S1                                      | 2256.6     | 2643.2     | 2539.1     | 2819.8        | 2734.4        | 2701.3        | 1.11          | 1.4E-01        |
| BF0960        | ribonuclease Z                                                         | 208.7      | 226.7      | 211.9      | 193.7         | 205.6         | 201.5         | 0.93          | 1.1E-01        |
| BF0961        | putative RNA polymerase ECF-type sigma factor                          | 207.8      | 186.7      | 201.3      | 170.6         | 174.3         | 179.4         | 0.88          | 4.2E-02        |
| BF0962        | hypothetical protein                                                   | 128.7      | 119.7      | 124.8      | 105.4         | 125.8         | 121.0         | 0.94          | 4.3E-01        |
| BF0963        | hypothetical protein                                                   | 121.4      | 114.0      | 143.1      | 147.8         | 146.5         | 137.1         | 1.14          | 1.9E-01        |
| BF0964        | hypothetical protein                                                   | 87.3       | 70.9       | 82.1       | 126.8         | 130.7         | 111.3         | 1.54          | 1.4E-02        |
| BF0965        | putative transmembrane zinc-binding protein                            | 39.7       | 41.0       | 39.0       | 25.5          | 26.4          | 20.7          | 0.60          | 8.2E-03        |
| valS          | putative valyl-tRNA synthetase                                         | 310.3      | 295.1      | 290.8      | 273.8         | 268.6         | 308.2         | 0.95          | 3.9E-01        |
| BF0967        | putative two-component sensor histidine kinase                         | 21.6       | 22.2       | 21.0       | 8.5           | 10.0          | 13.5          | 0.49          | 1.5E-02        |
| BF0969        | putative RNA polymerase ECF-type sigma factor                          | 24.6       | 29.9       | 26.1       | 83.8          | 79.6          | 95.2          | 3.21          | 8.6E-04        |
| BF0970        | putative anti-sigma factor                                             | 34.9       | 36.0       | 27.1       | 45.2          | 48.6          | 62.4          | 1.59          | 4.6E-02        |
| BF0971        | putative outer membrane protein                                        | 11.1       | 10.2       | 11.5       | 19.2          | 21.8          | 21.2          | 1.89          | 1.5E-03        |
| BF0972        | hypothetical protein                                                   | 12.5       | 9.9        | 10.7       | 25.7          | 28.5          | 25.5          | 2.41          | 1.8E-03        |
| BF0973        | putative endonuclease/exonuclease/phosphatase family protein           | 6.7        | 4.6        | 5.7        | 13.3          | 11.7          | 14.3          | 2.35          | 7.5E-03        |
| BF0974        | hypothetical protein                                                   | 64.1       | 77.8       | 78.9       | 117.3         | 116.0         | 114.3         | 1.58          | 7.5E-03        |
| BF0975        | putative RNA polymerase ECF-type sigma factor                          | 103.2      | 107.9      | 117.4      | 103.9         | 104.3         | 84.9          | 0.89          | 2.7E-01        |
| BF0976        | putative anti-sigma factor                                             | 13.7       | 13.2       | 12.5       | 691.0         | 705.3         | 797.2         | 55.59         | 4.8E-06        |
| <b>BF0977</b> | <b>putative TonB-dependent outer membrane receptor protein</b>         | <b>5.0</b> | <b>5.2</b> | <b>5.0</b> | <b>1313.9</b> | <b>1283.0</b> | <b>1235.9</b> | <b>253.44</b> | <b>4.4E-08</b> |
| BF0978        | putative outer membrane protein                                        | 5.8        | 6.1        | 7.9        | 1376.5        | 1276.9        | 1425.0        | 207.78        | 2.2E-05        |
| BF0979        | putative arylsulfatase precursor                                       | 3.6        | 6.2        | 6.8        | 1507.4        | 1366.2        | 1672.4        | 282.14        | 1.8E-04        |
| BF0980        | putative arylsulfatase                                                 | 77.5       | 78.5       | 71.0       | 304.6         | 290.4         | 356.2         | 4.18          | 3.7E-04        |
| BF0981        | hypothetical protein                                                   | 1047.7     | 940.5      | 962.4      | 703.0         | 813.5         | 695.3         | 0.75          | 2.0E-02        |
| BF0982        | hypothetical protein                                                   | 290.9      | 261.3      | 275.5      | 231.8         | 246.0         | 219.1         | 0.84          | 3.8E-02        |
| secA          | translocase                                                            | 569.7      | 589.9      | 511.5      | 506.1         | 455.0         | 486.0         | 0.87          | 8.7E-02        |
| BF0984        | putative alkaline phosphatase                                          | 321.3      | 344.3      | 285.0      | 216.8         | 181.7         | 197.2         | 0.63          | 9.7E-03        |



|        |                                                         |        |        |        |        |        |        |      |         |
|--------|---------------------------------------------------------|--------|--------|--------|--------|--------|--------|------|---------|
| BF0985 | putative transmembrane protein                          | 196.9  | 211.2  | 174.7  | 139.0  | 127.2  | 134.0  | 0.69 | 1.0E-02 |
| BF0989 | putative regulatory protein                             | 148.0  | 150.5  | 138.8  | 93.9   | 90.4   | 90.4   | 0.63 | 6.2E-04 |
| BF0990 | putative outer membrane protein                         | 880.9  | 771.7  | 818.0  | 609.8  | 593.2  | 650.2  | 0.75 | 1.0E-02 |
| BF0991 | hypothetical protein                                    | 1435.6 | 1483.4 | 1521.6 | 2164.0 | 2249.2 | 1992.5 | 1.44 | 3.2E-03 |
| BF0992 | hypothetical protein                                    | 229.2  | 225.8  | 229.1  | 284.2  | 289.0  | 270.0  | 1.23 | 2.6E-03 |
| BF0993 | putative transmembrane CBS domain transporter           | 151.0  | 157.5  | 168.2  | 220.2  | 219.4  | 204.3  | 1.35 | 5.6E-03 |
| BF0994 | hypothetical protein                                    | 1265.2 | 1342.8 | 1392.2 | 1470.6 | 1464.6 | 1341.1 | 1.07 | 2.4E-01 |
| BF0995 | hypothetical protein                                    | 409.3  | 400.8  | 384.1  | 317.2  | 329.0  | 310.1  | 0.80 | 3.8E-03 |
| BF0996 | hypothetical protein                                    | 299.6  | 317.7  | 303.4  | 358.6  | 398.8  | 355.5  | 1.21 | 2.2E-02 |
| BF0997 | putative 4-hydroxythreonine-4-phosphate dehydrogenase   | 426.3  | 446.0  | 415.5  | 546.0  | 486.7  | 498.1  | 1.19 | 2.8E-02 |
| BF0998 | putative sigma-54 dependent transcriptional regulator   | 371.0  | 370.5  | 362.6  | 429.5  | 411.7  | 429.5  | 1.15 | 3.7E-03 |
| BF0999 | hypothetical protein                                    | 294.1  | 305.6  | 291.8  | 333.5  | 355.7  | 319.7  | 1.13 | 4.2E-02 |
| BF1000 | hypothetical protein                                    | 161.5  | 161.4  | 170.4  | 188.0  | 185.4  | 191.4  | 1.15 | 7.8E-03 |
| BF1001 | possible protein-export transmembrane protein           | 1102.7 | 1254.2 | 1157.7 | 1270.3 | 1275.1 | 1221.8 | 1.07 | 2.1E-01 |
| BF1002 | putative transmembrane transporter                      | 151.8  | 145.1  | 158.2  | 290.3  | 294.4  | 234.0  | 1.79 | 5.9E-03 |
| BF1003 | hypothetical protein                                    | 132.6  | 123.0  | 150.9  | 215.0  | 221.6  | 215.2  | 1.61 | 5.1E-03 |
| BF1004 | hypothetical protein                                    | 782.0  | 773.1  | 695.9  | 571.7  | 562.2  | 559.1  | 0.75 | 5.7E-03 |
| BF1005 | putative YjeF-related sugar kinase                      | 91.4   | 99.7   | 85.3   | 98.9   | 72.2   | 91.0   | 0.94 | 6.6E-01 |
| BF1006 | putative transmembrane protein                          | 0.0    | 0.6    | 0.1    | 0.0    | 0.0    | 0.1    | 0.44 |         |
| BF1007 | putative methyltransferase                              | 51.3   | 44.3   | 53.8   | 77.6   | 71.6   | 76.7   | 1.52 | 8.3E-03 |
| upcY   | putative transcriptional regulator                      | 20.4   | 20.3   | 20.6   | 8.7    | 5.5    | 8.2    | 0.36 | 6.4E-03 |
| upcZ   | putative transcriptional regulator                      | 18.0   | 16.7   | 17.8   | 11.5   | 14.6   | 14.2   | 0.76 | 4.8E-02 |
| rmlA2  | glucose-1-phosphate thymidyl transferase                | 12.7   | 15.0   | 13.8   | 10.2   | 14.0   | 9.0    | 0.79 | 2.2E-01 |
| rmlC1  | dTDP-6-deoxy-D-glucose-3,5 epimerase                    | 7.4    | 13.3   | 8.5    | 10.4   | 11.2   | 6.8    | 0.98 | 9.5E-01 |
| wcfA   | putative acetyl transferase                             | 9.1    | 10.8   | 14.5   | 2.9    | 5.9    | 4.2    | 0.37 | 3.1E-02 |
| wzx2   | putative O-antigen flippase                             | 9.0    | 7.5    | 8.9    | 3.8    | 4.5    | 3.7    | 0.48 | 3.8E-03 |
| wcfB   | putative fucosyl transferase                            | 9.6    | 11.7   | 11.7   | 5.0    | 6.1    | 3.9    | 0.45 | 1.4E-02 |
| wcfC   | putative glycosyltransferase                            | 11.9   | 10.3   | 10.0   | 8.1    | 7.7    | 7.1    | 0.71 | 1.4E-02 |
| wcfD   | putative acetyltransferase                              | 12.6   | 10.6   | 10.4   | 5.9    | 5.9    | 4.9    | 0.50 | 4.9E-03 |
| wzy2   | putative polysaccharide polymerase                      | 3.5    | 3.7    | 4.9    | 1.7    | 2.2    | 1.4    | 0.43 | 1.9E-02 |
| wcfE   | putative glycosyltransferase                            | 6.6    | 5.6    | 4.7    | 2.7    | 5.8    | 4.3    | 0.73 | 3.4E-01 |
| wcfF   | putative UDP-glucose-6 dehydrogenase                    | 11.6   | 13.2   | 12.0   | 11.5   | 14.1   | 11.8   | 1.01 | 9.0E-01 |
| wcfG   | putative glycosyltransferase                            | 12.8   | 12.9   | 11.7   | 9.7    | 10.8   | 7.3    | 0.74 | 1.0E-01 |
| wcfH   | putative deacetylase                                    | 9.0    | 8.9    | 10.2   | 6.9    | 7.1    | 6.7    | 0.73 | 7.6E-03 |
| wcfI   | putative glycosyltransferase                            | 7.5    | 6.8    | 5.8    | 7.3    | 6.3    | 5.1    | 0.92 | 6.2E-01 |
| wcfJ   | putative glycosyltransferase                            | 5.3    | 4.9    | 7.1    | 4.6    | 6.4    | 4.0    | 0.86 | 5.2E-01 |
| wcfK   | putative epimerase/dehydratase                          | 6.4    | 5.9    | 6.1    | 4.1    | 4.0    | 3.3    | 0.62 | 7.6E-03 |
| wcfL   | putative phosphate transferase                          | 10.3   | 10.4   | 12.4   | 4.5    | 4.5    | 3.2    | 0.37 | 5.4E-03 |
| BF1027 | putative iron-regulated transmembrane protein           | 1133.6 | 1167.9 | 1311.2 | 1208.2 | 1236.1 | 1049.4 | 0.97 | 7.0E-01 |
| BF1028 | conserved hypothetical lipoprotein                      | 1347.1 | 1369.1 | 1386.9 | 1867.6 | 1780.6 | 1552.4 | 1.26 | 2.9E-02 |
| BF1029 | putative TonB-dependent outer membrane receptor protein | 234.8  | 237.2  | 247.7  | 304.7  | 290.0  | 266.9  | 1.20 | 2.8E-02 |

|        |                                                                                        |         |         |         |         |         |         |      |         |
|--------|----------------------------------------------------------------------------------------|---------|---------|---------|---------|---------|---------|------|---------|
| BF1031 | putative hypoxanthine guanine phosphoribosyltransferase                                | 381.2   | 363.5   | 398.7   | 208.3   | 191.0   | 214.4   | 0.54 | 9.6E-04 |
| adk    | adenylate kinase                                                                       | 694.4   | 622.0   | 679.4   | 610.3   | 625.4   | 675.6   | 0.96 | 4.7E-01 |
| obg    | putative Spo0B-related GTP-binding protein                                             | 430.2   | 338.6   | 372.9   | 229.0   | 253.1   | 298.0   | 0.68 | 4.0E-02 |
| BF1034 | hypothetical protein                                                                   | 87.0    | 61.6    | 65.2    | 37.6    | 43.7    | 55.2    | 0.64 | 7.3E-02 |
| BF1035 | hypothetical protein                                                                   | 55.9    | 43.4    | 49.6    | 36.9    | 34.0    | 56.9    | 0.84 | 4.5E-01 |
| BF1036 | putative M23/M37-family peptidase                                                      | 48.9    | 35.2    | 36.1    | 48.0    | 39.3    | 56.8    | 1.20 | 3.6E-01 |
| BF1037 | hypothetical protein                                                                   | 13.4    | 13.7    | 15.2    | 14.8    | 21.9    | 20.2    | 1.33 | 1.3E-01 |
| BF1038 | hypothetical protein                                                                   | 43.2    | 51.0    | 50.8    | 55.9    | 52.5    | 45.6    | 1.06 | 5.8E-01 |
| tmRNA  | RF00023                                                                                | 31100.7 | 16870.8 | 17786.5 | 12045.9 | 13293.3 | 27299.9 | 0.78 | 5.5E-01 |
| BF1040 | hypothetical protein                                                                   | 121.5   | 112.1   | 142.6   | 113.1   | 136.6   | 155.3   | 1.07 | 6.4E-01 |
| dinB   | putative DNA polymerase IV                                                             | 37.9    | 36.7    | 31.7    | 36.7    | 28.4    | 41.5    | 0.99 | 9.7E-01 |
| BF1044 | hypothetical protein                                                                   | 78.1    | 72.6    | 87.0    | 53.8    | 63.3    | 50.9    | 0.71 | 2.9E-02 |
| BF1045 | possible transglutaminase-family protein                                               | 138.3   | 150.1   | 137.5   | 224.1   | 216.7   | 210.0   | 1.53 | 1.4E-03 |
| BF1046 | putative C4-dicarboxylate anaerobic carrier                                            | 53.1    | 56.9    | 51.6    | 78.3    | 83.1    | 71.6    | 1.44 | 6.9E-03 |
| BF1047 | hypothetical protein                                                                   | 4932.8  | 4617.1  | 5030.3  | 472.0   | 559.9   | 408.8   | 0.10 | 2.3E-04 |
| BF1048 | hypothetical protein                                                                   | 150.3   | 140.8   | 149.3   | 75.8    | 87.8    | 75.8    | 0.54 | 1.7E-03 |
| BF1049 | hypothetical protein                                                                   | 7.8     | 5.8     | 4.1     | 1.9     | 2.0     | 1.3     | 0.30 | 1.5E-02 |
| mmdB   | putative transmembrane methylmalonyl-CoA/oxaloacetate decarboxylase, beta-subunit      | 2.9     | 5.4     | 6.1     | 4.0     | 2.4     | 3.9     | 0.73 | 4.0E-01 |
| BF1051 | putative 3,4-dihydroxy-2-butanone 4-phosphate/shikimate 5-dehydrogenase fusion protein | 3.8     | 2.9     | 3.9     | 6.1     | 5.5     | 4.1     | 1.47 | 1.0E-01 |
| BF1052 | putative AraC-family transcriptional regulator                                         | 22.8    | 18.2    | 20.4    | 19.5    | 24.5    | 19.7    | 1.04 | 7.8E-01 |
| BF1053 | hypothetical protein                                                                   | 16.0    | 13.7    | 11.8    | 10.1    | 26.0    | 21.5    | 1.30 | 5.0E-01 |
| BF1054 | hypothetical protein                                                                   | 49.8    | 49.3    | 45.3    | 44.6    | 45.9    | 39.0    | 0.89 | 1.9E-01 |
| BF1055 | putative acetyltransferase                                                             | 41.4    | 36.1    | 42.7    | 41.6    | 42.0    | 42.7    | 1.05 | 4.5E-01 |
| BF1056 | putative ribosomal large subunit pseudouridine synthase                                | 69.7    | 68.9    | 68.2    | 71.5    | 66.6    | 65.5    | 0.98 | 6.5E-01 |
| BF1057 | putative restriction enzyme of type III restriction-modification system                | 99.5    | 102.4   | 98.7    | 115.7   | 114.2   | 102.4   | 1.10 | 1.1E-01 |
| BF1058 | putative modification enzyme of type III restriction-modification system               | 122.9   | 127.1   | 123.2   | 136.3   | 135.1   | 130.1   | 1.08 | 3.1E-02 |
| BF1059 | putative glycosyl hydrolase                                                            | 84.0    | 86.7    | 84.6    | 167.3   | 171.1   | 154.9   | 1.93 | 3.6E-04 |
| BF1060 | putative dehydrogenase/oxidoreductase                                                  | 66.4    | 61.3    | 56.9    | 76.3    | 87.0    | 69.8    | 1.26 | 7.0E-02 |
| BF1061 | hypothetical protein                                                                   | 31.0    | 48.9    | 42.4    | 22.3    | 28.5    | 20.5    | 0.59 | 5.8E-02 |
| BF1062 | hypothetical protein                                                                   | 61.8    | 70.0    | 56.0    | 49.1    | 62.3    | 48.8    | 0.85 | 2.5E-01 |
| BF1064 | hypothetical protein                                                                   | 0.0     | 0.0     | 0.0     | 0.0     | 0.0     | 0.0     |      |         |
| BF1066 | putative ATP/GTP-binding protein                                                       | 57.9    | 44.7    | 57.9    | 103.2   | 105.6   | 93.1    | 1.89 | 7.8E-03 |
| BF1067 | hypothetical protein                                                                   | 78.5    | 59.0    | 70.7    | 131.0   | 136.5   | 101.5   | 1.77 | 2.3E-02 |
| BF1068 | possible type I restriction-modification system protein                                | 52.2    | 41.5    | 53.4    | 101.5   | 106.9   | 82.7    | 1.98 | 1.0E-02 |
| BF1069 | hypothetical protein                                                                   | 99.1    | 73.4    | 100.0   | 158.8   | 165.8   | 120.8   | 1.64 | 4.7E-02 |
| BF1070 | hypothetical protein                                                                   | 16.6    | 19.6    | 21.3    | 11.1    | 8.0     | 7.5     | 0.46 | 1.4E-02 |
| BF1071 | hypothetical protein                                                                   | 16.5    | 15.9    | 19.2    | 6.5     | 7.4     | 6.6     | 0.40 | 1.3E-03 |

|        |                                                                          |       |       |       |       |       |       |      |         |
|--------|--------------------------------------------------------------------------|-------|-------|-------|-------|-------|-------|------|---------|
| BF1072 | hypothetical protein                                                     | 21.5  | 26.9  | 29.1  | 11.7  | 13.5  | 12.8  | 0.49 | 6.8E-03 |
| BF1073 | putative DNA-binding protein                                             | 42.1  | 33.3  | 33.3  | 56.3  | 47.5  | 61.1  | 1.52 | 3.5E-02 |
| BF1074 | hypothetical protein                                                     | 67.6  | 59.1  | 66.5  | 91.6  | 97.8  | 82.0  | 1.40 | 1.7E-02 |
| BF1076 | putative DNA-binding protein                                             | 77.1  | 95.5  | 97.2  | 94.2  | 101.2 | 83.9  | 1.04 | 7.6E-01 |
| BF1077 | putative modification protein of type I restriction-modification system  | 96.2  | 88.6  | 95.8  | 137.0 | 144.2 | 116.1 | 1.41 | 1.9E-02 |
| BF1078 | putative modification protein of type I restriction-modification system  | 82.5  | 77.5  | 80.0  | 119.1 | 123.6 | 94.4  | 1.40 | 3.5E-02 |
| BF1079 | putative type I restriction enzyme                                       | 96.0  | 89.3  | 93.8  | 133.9 | 142.7 | 106.0 | 1.36 | 5.3E-02 |
| BF1080 | hypothetical protein                                                     | 54.1  | 62.0  | 56.8  | 87.5  | 94.2  | 80.5  | 1.52 | 7.3E-03 |
| BF1081 | hypothetical protein                                                     | 43.8  | 52.0  | 58.7  | 69.3  | 67.8  | 55.2  | 1.25 | 1.7E-01 |
| BF1082 | hypothetical protein                                                     | 51.3  | 38.4  | 42.6  | 47.0  | 52.5  | 41.9  | 1.07 | 6.1E-01 |
| BF1083 | hypothetical protein                                                     | 44.3  | 34.8  | 48.8  | 38.8  | 42.2  | 43.9  | 0.99 | 9.2E-01 |
| BF1088 | hypothetical protein                                                     | 0.0   | 0.0   | 0.6   | 0.0   | 0.6   | 0.0   | 1.05 |         |
| BF1089 | hypothetical protein                                                     | 0.0   | 0.0   | 0.0   | 0.0   | 0.0   | 0.0   |      |         |
| BF1090 | hypothetical protein                                                     | 0.8   | 1.4   | 1.2   | 0.3   | 0.3   | 0.8   | 0.36 | 8.6E-02 |
| BF1091 | hypothetical protein                                                     | 5.3   | 1.1   | 2.3   | 5.0   | 4.9   | 4.0   | 1.93 | 2.8E-01 |
| BF1092 | hypothetical protein                                                     | 7.1   | 11.3  | 6.5   | 8.9   | 4.1   | 13.5  | 0.99 | 9.8E-01 |
| BF1093 | hypothetical protein                                                     | 29.0  | 30.6  | 33.6  | 35.6  | 37.9  | 27.9  | 1.08 | 5.7E-01 |
| BF1095 | hypothetical protein                                                     | 4.2   | 1.3   | 1.3   | 1.7   | 0.7   | 1.2   | 0.58 | 3.8E-01 |
| BF1096 | hypothetical protein                                                     | 0.0   | 0.8   | 0.0   | 0.0   | 0.9   | 0.0   | 1.09 |         |
| BF1097 | putative ATP-binding protein                                             | 65.4  | 64.8  | 46.8  | 116.5 | 79.1  | 152.1 | 1.92 | 7.0E-02 |
| BF1098 | hypothetical protein                                                     | 2.7   | 1.0   | 5.0   | 0.9   | 4.2   | 2.6   | 0.90 | 9.0E-01 |
| BF1099 | hypothetical protein                                                     | 1.8   | 0.9   | 0.0   | 1.7   | 0.0   | 0.0   | 1.30 |         |
| BF1100 | putative ATP-binding protein                                             | 40.1  | 47.2  | 42.8  | 73.0  | 77.9  | 51.2  | 1.53 | 6.3E-02 |
| BF1101 | hypothetical protein                                                     | 39.5  | 31.9  | 37.4  | 42.4  | 50.0  | 36.7  | 1.18 | 2.7E-01 |
| BF1102 | conserved hypothetical protein with RecF/RecN/SMC N-terminal domain      | 28.1  | 24.0  | 27.4  | 33.8  | 43.2  | 28.5  | 1.31 | 1.6E-01 |
| BF1103 | putative ATP-dependent DNA helicase                                      | 27.6  | 21.0  | 27.6  | 35.5  | 41.8  | 27.6  | 1.37 | 1.6E-01 |
| BF1104 | hypothetical protein                                                     | 29.3  | 25.7  | 29.0  | 32.3  | 36.9  | 28.6  | 1.16 | 2.1E-01 |
| BF1106 | hypothetical protein                                                     | 4.7   | 6.5   | 6.0   | 3.2   | 3.1   | 3.2   | 0.56 | 1.0E-02 |
| BF1107 | hypothetical protein                                                     | 183.1 | 179.2 | 192.8 | 192.6 | 193.5 | 110.3 | 0.87 | 5.6E-01 |
| BF1108 | putative beta-lactamase protein                                          | 72.9  | 69.9  | 77.8  | 89.2  | 99.4  | 80.6  | 1.22 | 7.5E-02 |
| BF1109 | putative ATP/GTP-binding protein                                         | 48.2  | 41.1  | 50.3  | 66.7  | 78.2  | 59.8  | 1.46 | 3.6E-02 |
| BF1110 | hypothetical protein                                                     | 58.8  | 41.9  | 57.8  | 62.2  | 73.0  | 69.5  | 1.30 | 1.4E-01 |
| BF1111 | hypothetical protein                                                     | 58.8  | 82.6  | 77.2  | 90.1  | 78.6  | 102.0 | 1.24 | 2.2E-01 |
| BF1112 | hypothetical protein                                                     | 19.8  | 23.0  | 24.3  | 9.4   | 9.8   | 12.6  | 0.47 | 7.3E-03 |
| BF1113 | hypothetical protein                                                     | 17.9  | 11.8  | 15.7  | 6.5   | 4.9   | 5.6   | 0.38 | 8.2E-03 |
| BF1114 | hypothetical protein                                                     | 12.4  | 13.9  | 18.4  | 6.0   | 6.0   | 5.8   | 0.40 | 5.3E-03 |
| BF1116 | putative DNA-binding protein                                             | 188.9 | 181.4 | 163.4 | 237.2 | 205.8 | 195.6 | 1.19 | 1.1E-01 |
| BF1117 | hypothetical protein                                                     | 149.0 | 155.1 | 151.0 | 214.0 | 209.4 | 183.9 | 1.33 | 1.1E-02 |
| BF1118 | hypothetical protein                                                     | 153.4 | 147.0 | 144.2 | 169.6 | 200.9 | 154.5 | 1.17 | 1.6E-01 |
| BF1119 | hypothetical protein                                                     | 92.6  | 86.4  | 85.2  | 119.3 | 122.8 | 118.8 | 1.37 | 1.8E-03 |
| BF1120 | putative modification enzyme of type III restriction-modification system | 120.9 | 117.1 | 117.4 | 163.0 | 163.1 | 156.1 | 1.36 | 5.9E-04 |
| BF1121 | putative DNA-binding protein                                             | 149.5 | 125.5 | 135.0 | 176.1 | 172.3 | 161.5 | 1.25 | 3.6E-02 |
| BF1122 | putative restriction enzyme of type III restriction-modification system  | 145.9 | 140.4 | 132.5 | 200.9 | 194.5 | 194.3 | 1.41 | 1.8E-03 |
| BF1123 | putative ATP/GTP-binding protein                                         | 61.6  | 68.9  | 65.5  | 76.6  | 83.4  | 68.2  | 1.16 | 1.3E-01 |
| BF1124 | putative ATP/GTP-binding protein                                         | 61.3  | 59.9  | 69.9  | 99.9  | 99.5  | 90.1  | 1.52 | 6.7E-03 |
| BF1125 | hypothetical protein                                                     | 71.4  | 55.1  | 65.1  | 79.9  | 90.8  | 76.8  | 1.30 | 7.7E-02 |

|        |                                                                                         |        |        |        |        |        |        |      |         |
|--------|-----------------------------------------------------------------------------------------|--------|--------|--------|--------|--------|--------|------|---------|
| BF1126 | hypothetical protein                                                                    | 85.0   | 79.1   | 86.4   | 87.2   | 104.5  | 90.9   | 1.13 | 1.8E-01 |
| BF1127 | putative transmembrane protein                                                          | 32.4   | 22.8   | 28.3   | 23.8   | 25.1   | 17.6   | 0.80 | 2.7E-01 |
| BF1128 | hypothetical protein                                                                    | 1.6    | 1.1    | 0.8    | 0.4    | 0.0    | 0.6    | 0.43 | 7.3E-02 |
| BF1129 | hypothetical protein                                                                    | 0.0    | 0.4    | 2.3    | 0.4    | 0.0    | 0.8    | 0.56 | 6.5E-01 |
| BF1132 | hypothetical protein                                                                    | 4.4    | 5.1    | 3.8    | 2.3    | 2.5    | 3.0    | 0.59 | 2.0E-02 |
| xis    | putative excisionase                                                                    | 2.4    | 2.0    | 3.6    | 2.7    | 2.7    | 3.6    | 1.15 | 5.9E-01 |
| BF1134 | putative transmembrane protein                                                          | 3.1    | 2.6    | 4.1    | 4.9    | 4.3    | 2.4    | 1.14 | 6.9E-01 |
| int    | putative bacteriophage integrase                                                        | 5.7    | 5.0    | 6.4    | 2.4    | 2.2    | 1.2    | 0.33 | 1.8E-02 |
| BF1137 | putative transposase                                                                    | 4.4    | 5.8    | 5.1    | 3.0    | 2.3    | 3.3    | 0.56 | 2.5E-02 |
| BF1138 | tRNA modification GTPase                                                                | 144.8  | 133.4  | 144.4  | 146.8  | 139.6  | 137.3  | 1.00 | 9.5E-01 |
| BF1139 | putative two-component system sensor histidine kinase/response regulator fusion protein | 45.5   | 40.8   | 37.8   | 39.0   | 45.8   | 40.3   | 1.01 | 9.3E-01 |
| BF1140 | hypothetical protein                                                                    | 87.5   | 95.1   | 91.3   | 47.8   | 38.0   | 43.4   | 0.47 | 2.2E-03 |
| BF1141 | putative exonuclease                                                                    | 208.9  | 247.4  | 238.8  | 255.6  | 254.2  | 237.2  | 1.08 | 3.3E-01 |
| BF1142 | putative purine nucleoside phosphorylase/uridine phosphorylase family protein           | 207.2  | 220.1  | 242.3  | 461.6  | 474.8  | 411.0  | 2.01 | 2.0E-03 |
| BF1143 | hypothetical protein                                                                    | 266.1  | 257.0  | 270.7  | 523.2  | 535.6  | 486.2  | 1.95 | 3.9E-04 |
| BF1144 | putative transmembrane protein                                                          | 179.1  | 208.4  | 186.1  | 190.0  | 224.7  | 201.3  | 1.07 | 4.2E-01 |
| BF1145 | hypothetical protein                                                                    | 307.9  | 296.6  | 294.4  | 292.8  | 343.3  | 286.4  | 1.02 | 7.7E-01 |
| BF1146 | hypothetical protein                                                                    | 40.9   | 33.0   | 40.2   | 27.2   | 17.2   | 28.4   | 0.63 | 8.9E-02 |
| BF1147 | hypothetical protein                                                                    | 43.0   | 41.2   | 41.1   | 58.5   | 48.2   | 54.1   | 1.28 | 2.8E-02 |
| apbE   | putative thiamine biosynthesis lipoprotein                                              | 81.4   | 78.8   | 88.1   | 135.7  | 124.4  | 120.7  | 1.53 | 3.7E-03 |
| BF1149 | putative transmembrane protein                                                          | 89.3   | 82.8   | 102.0  | 112.1  | 103.7  | 100.1  | 1.16 | 1.5E-01 |
| BF1150 | hypothetical protein                                                                    | 146.3  | 152.3  | 161.1  | 167.5  | 177.2  | 148.9  | 1.07 | 3.7E-01 |
| BF1151 | hypothetical protein                                                                    | 107.9  | 104.9  | 110.8  | 124.5  | 136.6  | 115.4  | 1.16 | 7.3E-02 |
| BF1152 | putative transmembrane glycosyltransferase                                              | 165.4  | 164.1  | 192.9  | 197.9  | 156.5  | 151.7  | 0.96 | 7.8E-01 |
| BF1153 | putative transmembrane protein                                                          | 217.7  | 260.5  | 303.4  | 187.1  | 165.7  | 174.2  | 0.68 | 3.8E-02 |
| BFt14  | tRNA-Thr-TGT                                                                            | 106.9  | 167.4  | 100.1  | 178.8  | 143.3  | 310.0  | 1.64 | 2.1E-01 |
| eno    | phosphopyruvate hydratase                                                               | 6667.7 | 6842.3 | 6609.0 | 5346.9 | 4991.5 | 4954.8 | 0.76 | 2.3E-03 |
| BF1156 | hypothetical protein                                                                    | 46.4   | 42.6   | 51.9   | 59.5   | 61.0   | 44.0   | 1.16 | 3.5E-01 |
| crcB   | putative transmembrane camphor resistance and chromosome condensation CrcB homologue    | 25.7   | 37.6   | 38.5   | 34.8   | 41.0   | 26.9   | 1.01 | 9.7E-01 |
| susB   | putative alpha-glucosidase                                                              | 118.9  | 120.1  | 131.7  | 21.9   | 27.5   | 21.4   | 0.19 | 4.3E-04 |
| BF1159 | putative DNA-binding protein                                                            | 29.9   | 18.2   | 26.4   | 57.1   | 67.0   | 43.3   | 2.26 | 2.9E-02 |
| BF1160 | hypothetical protein                                                                    | 5.1    | 4.7    | 6.9    | 11.1   | 12.7   | 9.0    | 1.98 | 2.4E-02 |
| BF1161 | hypothetical protein                                                                    | 13.9   | 16.5   | 11.0   | 13.2   | 11.9   | 16.4   | 1.01 | 9.7E-01 |
| hslR   | putative ribosome-associated heat shock protein                                         | 108.1  | 95.6   | 111.7  | 69.9   | 65.2   | 67.6   | 0.64 | 4.0E-03 |
| pth    | peptidyl-tRNA hydrolase                                                                 | 93.5   | 98.2   | 105.8  | 71.8   | 77.2   | 62.7   | 0.71 | 1.9E-02 |
| BF1164 | putative ribosomal L25p family stress protein                                           | 1534.3 | 1567.6 | 1845.7 | 1739.1 | 1687.9 | 1637.2 | 1.03 | 7.4E-01 |
| BF1165 | hypothetical protein                                                                    | 545.3  | 450.1  | 568.8  | 457.2  | 514.2  | 440.0  | 0.90 | 3.8E-01 |
| BF1166 | putative N utilization substance protein                                                | 947.5  | 946.3  | 1070.5 | 676.3  | 714.7  | 556.4  | 0.65 | 1.9E-02 |
| BF1167 | conserved hypothetical protein with preprotein translocase motif                        | 1862.2 | 2298.7 | 2336.4 | 1643.2 | 1828.6 | 1513.7 | 0.77 | 7.5E-02 |
| BF1168 | hypothetical protein                                                                    | 367.0  | 405.2  | 443.4  | 344.7  | 367.7  | 313.7  | 0.84 | 1.2E-01 |

|        |                                                                                                          |        |        |        |        |        |        |      |         |
|--------|----------------------------------------------------------------------------------------------------------|--------|--------|--------|--------|--------|--------|------|---------|
| BF1169 | putative dephospho-CoA kinase                                                                            | 260.1  | 247.5  | 273.8  | 255.7  | 250.9  | 213.7  | 0.92 | 3.3E-01 |
| BF1170 | hypothetical protein                                                                                     | 1344.8 | 1385.8 | 1591.2 | 1680.4 | 1894.5 | 1519.8 | 1.18 | 1.7E-01 |
| BF1171 | hypothetical protein                                                                                     | 171.3  | 171.3  | 194.3  | 92.0   | 93.6   | 113.6  | 0.56 | 5.9E-03 |
| clpB   | putative heat shock ClpB protein                                                                         | 327.6  | 310.7  | 298.6  | 92.2   | 87.2   | 83.5   | 0.28 | 1.1E-04 |
| BF1173 | hypothetical protein                                                                                     | 299.5  | 274.4  | 284.1  | 209.2  | 219.7  | 210.6  | 0.75 | 2.7E-03 |
| BF1174 | putative transcriptional regulator                                                                       | 182.0  | 180.6  | 193.7  | 146.0  | 164.4  | 142.9  | 0.81 | 2.8E-02 |
| BF1175 | putative transmembrane protein                                                                           | 130.4  | 125.5  | 132.3  | 71.6   | 80.5   | 66.6   | 0.56 | 2.6E-03 |
| BF1176 | hypothetical protein                                                                                     | 591.8  | 510.9  | 582.9  | 46.2   | 67.8   | 49.5   | 0.10 | 4.9E-04 |
| BF1177 | hypothetical protein                                                                                     | 199.3  | 155.2  | 178.1  | 12.8   | 13.0   | 11.1   | 0.07 | 1.3E-04 |
| BF1178 | putative RNA polymerase ECF-type sigma factor                                                            | 323.2  | 283.4  | 249.3  | 16.2   | 25.3   | 21.3   | 0.07 | 5.7E-04 |
| BF1179 | hypothetical protein                                                                                     | 57.6   | 72.5   | 73.7   | 54.0   | 64.5   | 42.6   | 0.78 | 2.2E-01 |
| recA   | recombinase A                                                                                            | 748.0  | 685.6  | 736.6  | 785.7  | 776.4  | 735.8  | 1.06 | 2.2E-01 |
| bcp    | putative bacterioferritin comigratory protein                                                            | 316.6  | 280.9  | 314.7  | 463.9  | 443.3  | 407.9  | 1.44 | 7.6E-03 |
| BF1182 | hypothetical protein                                                                                     | 462.3  | 445.2  | 483.0  | 647.0  | 659.7  | 586.4  | 1.36 | 6.7E-03 |
| BF1183 | hypothetical protein                                                                                     | 3.7    | 4.7    | 2.5    | 2.9    | 4.1    | 1.8    | 0.79 | 5.6E-01 |
| BF1184 | hypothetical protein                                                                                     | 622.7  | 574.2  | 652.1  | 438.6  | 456.3  | 381.3  | 0.69 | 1.3E-02 |
| BF1185 | putative iron transport-related family system permease protein                                           | 40.7   | 38.7   | 34.4   | 41.3   | 36.8   | 45.1   | 1.08 | 4.4E-01 |
| BF1186 | putative iron-related ABC transport periplasmic binding protein                                          | 55.4   | 48.9   | 47.3   | 42.3   | 41.1   | 40.1   | 0.82 | 3.2E-02 |
| BF1187 | putative polysialic acid transport protein                                                               | 2.4    | 2.4    | 2.4    | 1.6    | 1.1    | 2.1    | 0.65 | 1.1E-01 |
| BF1188 | putative transcriptional regulator                                                                       | 7.1    | 6.4    | 7.4    | 5.1    | 4.7    | 2.9    | 0.59 | 7.2E-02 |
| dnaK   | molecular chaperone DnaK                                                                                 | 1230.1 | 1220.7 | 942.3  | 430.8  | 421.3  | 347.5  | 0.35 | 3.1E-03 |
| BF1190 | putative transporter periplasmic binding protein                                                         | 25.7   | 22.9   | 23.9   | 8.5    | 5.9    | 9.2    | 0.32 | 4.9E-03 |
| nfo    | endonuclease IV                                                                                          | 105.8  | 108.8  | 101.4  | 130.5  | 118.6  | 123.6  | 1.18 | 2.0E-02 |
| trpB   | tryptophan synthase subunit beta                                                                         | 201.9  | 203.9  | 194.2  | 375.5  | 376.4  | 329.1  | 1.80 | 1.4E-03 |
| ktrB   | putative transmembrane K+/Na+ uptake protein                                                             | 175.4  | 185.4  | 197.6  | 84.2   | 95.0   | 69.9   | 0.44 | 4.1E-03 |
| ktrA   | putative K+/Na+ uptake protein                                                                           | 135.4  | 109.0  | 110.0  | 83.0   | 87.1   | 91.4   | 0.74 | 3.4E-02 |
| katA   | catalase                                                                                                 | 419.8  | 556.9  | 553.9  | 1045.5 | 1418.6 | 1099.7 | 2.33 | 9.0E-03 |
| BF1196 | putative alpha-glucosidase, glycosylhydrolase                                                            | 25.5   | 29.5   | 29.1   | 42.6   | 44.0   | 38.5   | 1.49 | 8.6E-03 |
| BF1197 | putative ECF-type RNA polymerase sigma factor                                                            | 33.0   | 33.0   | 43.1   | 48.4   | 67.0   | 51.8   | 1.53 | 5.8E-02 |
| BF1198 | putative xylosidase/arabinosidase                                                                        | 93.2   | 100.6  | 110.7  | 51.1   | 54.4   | 50.2   | 0.51 | 1.6E-03 |
| cepA   | beta-lactamase                                                                                           | 102.0  | 86.5   | 93.2   | 60.9   | 60.4   | 56.1   | 0.63 | 4.2E-03 |
| BF1200 | hypothetical protein                                                                                     | 9.4    | 8.3    | 11.2   | 5.9    | 5.4    | 8.3    | 0.67 | 9.7E-02 |
| BF1203 | putative anti-sigma factor                                                                               | 9.1    | 9.3    | 8.4    | 5.6    | 5.1    | 4.2    | 0.55 | 8.0E-03 |
| BF1204 | putative outer membrane protein                                                                          | 8.3    | 8.2    | 8.9    | 6.7    | 7.0    | 7.3    | 0.83 | 1.2E-02 |
| BF1205 | hypothetical protein                                                                                     | 8.9    | 7.8    | 7.7    | 7.6    | 11.8   | 7.9    | 1.10 | 6.3E-01 |
| BF1206 | putative phosphohydrolase, lcc family possible phosphodiesterase/nucleotide pyrophosphatase-like protein | 40.8   | 36.9   | 28.9   | 33.7   | 30.2   | 38.1   | 0.96 | 8.1E-01 |
| BF1207 | putative endonuclease/exonuclease/phosphatase family protein                                             | 82.3   | 71.1   | 81.8   | 61.7   | 58.8   | 73.4   | 0.82 | 1.2E-01 |
| BF1208 | putative endonuclease/exonuclease/phosphatase family protein                                             | 83.8   | 107.7  | 102.3  | 83.0   | 80.8   | 75.9   | 0.82 | 1.1E-01 |

|        |                                                                            |       |        |        |        |        |        |      |         |
|--------|----------------------------------------------------------------------------|-------|--------|--------|--------|--------|--------|------|---------|
| ahpF   | alkyl hydroperoxide reductase subunit F                                    | 139.6 | 274.0  | 228.8  | 109.2  | 156.7  | 155.7  | 0.67 | 2.2E-01 |
| ahpC   | alkyl hydroperoxide reductase C subunit                                    | 699.3 | 1273.8 | 1206.2 | 2731.8 | 3176.8 | 3275.4 | 2.98 | 1.4E-02 |
| BF1211 | hypothetical protein                                                       | 0.0   | 0.0    | 1.4    | 0.0    | 0.0    | 1.3    | 0.87 |         |
| BF1212 | hypothetical protein                                                       | 30.5  | 17.2   | 16.6   | 20.0   | 14.4   | 34.4   | 1.04 | 9.2E-01 |
| BF1213 | hypothetical protein                                                       | 85.8  | 86.2   | 80.9   | 91.9   | 92.4   | 96.7   | 1.11 | 3.2E-02 |
| BF1214 | hypothetical protein                                                       | 224.9 | 204.6  | 170.7  | 84.7   | 81.4   | 98.7   | 0.44 | 4.6E-03 |
| BF1215 | hypothetical protein                                                       | 275.4 | 278.3  | 269.9  | 119.5  | 109.7  | 120.3  | 0.42 | 1.7E-04 |
| tdcG   | putative L-serine dehydratase                                              | 87.0  | 86.8   | 73.3   | 160.5  | 134.5  | 168.9  | 1.87 | 6.8E-03 |
| BF1217 | putative transmembrane magnesium and cobalt transporter protein            | 74.9  | 90.5   | 92.9   | 61.1   | 61.4   | 55.9   | 0.69 | 1.8E-02 |
| BF1218 | putative DNA mismatch repair MutS protein                                  | 104.0 | 95.3   | 96.7   | 70.7   | 60.1   | 66.7   | 0.67 | 5.8E-03 |
| BF115  | tRNA-Ser-TGA                                                               | 21.8  | 34.2   | 22.9   | 23.6   | 14.4   | 91.6   | 1.22 | 7.9E-01 |
| BF1219 | putative transposase                                                       | 8.1   | 7.9    | 6.9    | 1.5    | 1.5    | 1.6    | 0.20 | 1.9E-04 |
| BF1220 | hypothetical protein                                                       | 4.2   | 3.8    | 5.4    | 2.5    | 1.1    | 0.9    | 0.31 | 3.9E-02 |
| radC2  | putative DNA repair protein                                                | 0.8   | 0.4    | 1.7    | 0.4    | 0.0    | 0.4    | 0.45 | 2.1E-01 |
| BF1222 | putative anti-restriction protein                                          | 0.3   | 0.0    | 0.4    | 0.0    | 0.0    | 0.3    | 0.91 |         |
| BF1223 | hypothetical protein                                                       | 0.8   | 0.9    | 0.0    | 0.0    | 0.0    | 0.0    |      |         |
| BF1224 | hypothetical protein                                                       | 0.0   | 0.0    | 0.0    | 0.8    | 0.0    | 0.8    |      |         |
| BF1225 | hypothetical protein                                                       | 0.0   | 1.6    | 0.4    | 0.7    | 0.4    | 0.7    | 0.75 | 7.5E-01 |
| BF1226 | hypothetical protein                                                       | 119.5 | 138.2  | 130.6  | 72.8   | 74.7   | 64.6   | 0.55 | 2.7E-03 |
| BF1230 | hypothetical protein                                                       | 135.6 | 131.1  | 155.9  | 164.3  | 181.2  | 139.0  | 1.14 | 2.9E-01 |
| BF1231 | hypothetical protein                                                       | 21.1  | 21.2   | 26.3   | 28.4   | 30.2   | 20.8   | 1.15 | 4.4E-01 |
| BF1232 | conserved hypothetical protein found in conjugate transposon               | 21.6  | 22.1   | 21.6   | 13.0   | 11.3   | 14.7   | 0.59 | 7.0E-03 |
| BF1233 | conserved hypothetical protein found in conjugate transposon               | 0.6   | 0.6    | 0.0    | 0.0    | 0.0    | 0.3    | 0.47 |         |
| BF1234 | conserved hypothetical protein found in conjugate transposon               | 0.8   | 1.0    | 0.6    | 0.2    | 0.2    | 0.4    | 0.31 | 2.2E-02 |
| BF1235 | conserved hypothetical protein found in conjugate transposon               | 0.1   | 0.8    | 0.0    | 0.2    | 0.0    | 0.4    | 0.92 | 9.5E-01 |
| BF1236 | conserved hypothetical protein found in conjugate transposon               | 0.0   | 0.0    | 0.0    | 0.0    | 0.0    | 0.0    |      |         |
| BF1237 | conserved hypothetical protein found in conjugate transposon               | 0.0   | 0.6    | 0.0    | 0.3    | 0.0    | 0.0    | 0.45 |         |
| BF1238 | conserved hypothetical transmembrane protein found in conjugate transposon | 0.9   | 0.7    | 1.5    | 0.3    | 0.6    | 0.3    | 0.41 | 6.7E-02 |
| BF1239 | conserved hypothetical protein found on conjugate transposon               | 0.0   | 0.3    | 0.3    | 0.0    | 0.3    | 0.3    | 0.97 | 8.4E-01 |
| BF1240 | conserved hypothetical protein found on conjugate transposon               | 0.0   | 0.0    | 0.0    | 0.0    | 0.0    | 0.5    |      |         |
| BF1241 | conserved hypothetical protein found on conjugate transposon               | 0.5   | 0.2    | 0.2    | 0.1    | 0.1    | 0.2    | 0.40 | 1.9E-01 |
| BF1242 | conserved hypothetical transmembrane protein found on conjugate transposon | 0.0   | 0.0    | 0.6    | 1.5    | 0.0    | 0.0    | 2.58 |         |

|        |                                                                            |        |        |        |        |        |        |      |         |
|--------|----------------------------------------------------------------------------|--------|--------|--------|--------|--------|--------|------|---------|
| BF1243 | conserved hypothetical transmembrane protein found in conjugate transposon | 0.6    | 0.0    | 1.3    | 0.0    | 0.0    | 0.6    | 0.65 |         |
| BF1244 | hypothetical protein                                                       | 0.2    | 0.0    | 0.3    | 0.2    | 0.3    | 0.7    | 1.40 | 4.8E-01 |
| BF1245 | conserved hypothetical protein found in conjugate transposon               | 0.4    | 0.0    | 0.4    | 0.0    | 0.0    | 0.0    |      |         |
| BF1246 | conserved hypothetical protein found in conjugate transposon               | 0.0    | 0.2    | 0.0    | 0.0    | 0.0    | 0.2    | 0.90 |         |
| BF1247 | hypothetical protein                                                       | 0.4    | 0.0    | 0.4    | 0.0    | 0.0    | 0.0    |      |         |
| BF1248 | hypothetical protein                                                       | 0.0    | 0.0    | 0.4    | 0.0    | 0.9    | 0.0    | 2.10 |         |
| BF1249 | putative mobilisation protein                                              | 0.4    | 0.2    | 0.2    | 0.3    | 0.0    | 0.1    | 0.89 | 8.5E-01 |
| BF1250 | putative transmembrane mobilisation protein                                | 4.5    | 5.0    | 5.2    | 3.6    | 3.1    | 3.0    | 0.66 | 1.1E-02 |
| BF1251 | hypothetical protein                                                       | 124.7  | 126.2  | 151.1  | 82.8   | 91.1   | 74.7   | 0.62 | 1.2E-02 |
| BF1252 | hypothetical protein                                                       | 358.7  | 391.0  | 431.2  | 250.2  | 290.3  | 215.1  | 0.64 | 2.5E-02 |
| BF1253 | hypothetical protein                                                       | 0.7    | 0.5    | 0.3    | 0.2    | 0.3    | 0.1    | 0.42 | 1.4E-01 |
| exc    | putative transposon excision protein                                       | 16.4   | 14.9   | 20.5   | 7.9    | 10.6   | 10.7   | 0.56 | 2.9E-02 |
| BF1255 | hypothetical protein                                                       | 329.6  | 304.8  | 380.8  | 236.5  | 259.1  | 228.7  | 0.72 | 2.4E-02 |
| BF1256 | hypothetical protein                                                       | 1539.5 | 1617.5 | 1817.9 | 1334.1 | 1375.2 | 1192.1 | 0.78 | 4.0E-02 |
| BF1257 | hypothetical protein                                                       | 0.6    | 2.7    | 2.8    | 0.0    | 0.0    | 0.0    |      |         |
| BF1258 | hypothetical protein                                                       | 0.4    | 0.8    | 0.6    | 0.2    | 0.3    | 0.2    | 0.45 | 3.2E-02 |
| BF1259 | hypothetical protein                                                       | 1.0    | 0.0    | 0.0    | 0.0    | 0.6    | 0.0    | 0.58 |         |
| BF1260 | hypothetical protein                                                       | 0.0    | 0.0    | 0.0    | 0.0    | 0.0    | 0.0    |      |         |
| bexA   | putative transmembrane MatE family multidrug efflux transporter            | 0.4    | 0.4    | 0.6    | 0.5    | 0.8    | 0.5    | 1.26 | 3.5E-01 |
| BF1263 | putative transcriptional regulator, AraC family                            | 11.1   | 17.1   | 13.4   | 9.5    | 13.8   | 10.0   | 0.80 | 3.4E-01 |
| BF1264 | hypothetical protein                                                       | 6.7    | 6.2    | 5.7    | 14.4   | 13.5   | 9.6    | 1.99 | 1.6E-02 |
| BF1265 | hypothetical protein                                                       | 14.6   | 12.7   | 9.6    | 29.0   | 29.7   | 24.6   | 2.28 | 1.0E-02 |
| BF1266 | possible AraC family transcriptional regulator                             | 13.2   | 11.4   | 12.5   | 32.9   | 34.8   | 20.0   | 2.30 | 2.2E-02 |
| BF1267 | hypothetical protein                                                       | 31.8   | 26.9   | 34.5   | 76.4   | 80.7   | 65.2   | 2.39 | 3.6E-03 |
| BF1268 | putative haloacid dehalogenase-like hydrolase                              | 16.1   | 15.4   | 15.3   | 27.9   | 33.7   | 22.7   | 1.78 | 1.7E-02 |
| BF1269 | putative sugar O-acetyltransferase                                         | 18.2   | 23.8   | 14.6   | 22.3   | 22.8   | 24.8   | 1.26 | 2.5E-01 |
| BF1270 | putative AraC-family transcriptional regulatory protein                    | 28.5   | 32.3   | 32.0   | 30.0   | 29.1   | 21.7   | 0.86 | 3.2E-01 |
| BF1271 | hypothetical protein                                                       | 87.8   | 85.0   | 93.8   | 54.1   | 71.1   | 69.9   | 0.73 | 4.9E-02 |
| BF1272 | hypothetical protein                                                       | 73.0   | 70.7   | 64.8   | 32.0   | 41.6   | 43.9   | 0.56 | 1.3E-02 |
| BF1273 | hypothetical protein                                                       | 86.3   | 64.7   | 87.9   | 27.2   | 30.5   | 29.4   | 0.37 | 2.9E-03 |
| BF1274 | putative transmembrane protein                                             | 23.5   | 28.5   | 27.2   | 9.5    | 10.7   | 10.7   | 0.39 | 1.2E-03 |
| BF1275 | putative cNMP and DNA binding protein, possible regulator                  | 109.6  | 109.3  | 90.0   | 28.8   | 35.5   | 21.1   | 0.27 | 5.0E-03 |
| BF1277 | putative zinc-binding alcohol dehydrogenase                                | 86.3   | 64.5   | 64.6   | 77.8   | 87.3   | 111.2  | 1.28 | 2.2E-01 |
| BF1278 | putative SpoU-like rRNA methylase                                          | 38.6   | 30.9   | 35.8   | 38.7   | 45.0   | 42.7   | 1.20 | 1.2E-01 |
| BF1279 | putative thioredoxin                                                       | 159.6  | 148.3  | 132.5  | 45.9   | 39.1   | 49.6   | 0.31 | 1.1E-03 |
| BF1280 | putative sulfatase protein                                                 | 100.5  | 98.0   | 101.9  | 146.7  | 148.2  | 134.4  | 1.43 | 2.1E-03 |
| BF1281 | putative two-component sensor histidine kinase                             | 28.6   | 31.2   | 33.6   | 20.5   | 23.2   | 20.1   | 0.68 | 1.1E-02 |
| BF1282 | putative transmembrane protein                                             | 7.3    | 6.3    | 7.9    | 5.8    | 6.5    | 5.7    | 0.84 | 1.2E-01 |

|               |                                                                 |             |            |             |              |              |              |              |                |
|---------------|-----------------------------------------------------------------|-------------|------------|-------------|--------------|--------------|--------------|--------------|----------------|
| BF1283        | putative transmembrane cation transport P type ATPase           | 28.0        | 19.8       | 22.1        | 16.9         | 24.2         | 23.6         | 0.93         | 7.0E-01        |
| BF1284        | hypothetical protein                                            | 116.0       | 91.2       | 98.1        | 73.9         | 79.0         | 97.6         | 0.82         | 2.0E-01        |
| BF1285        | putative outer membrane protein                                 | 831.7       | 741.2      | 906.1       | 1345.5       | 1305.0       | 1093.7       | 1.51         | 2.0E-02        |
| BF1286        | hypothetical protein                                            | 1.1         | 1.2        | 1.2         | 0.0          | 0.0          | 2.1          | 1.82         |                |
| BF1287        | hypothetical protein                                            | 275.6       | 247.1      | 242.5       | 52.1         | 59.7         | 47.1         | 0.21         | 4.0E-04        |
| purF          | putative amidophosphoribosyltransferase precursor               | 291.7       | 246.2      | 297.3       | 210.6        | 203.0        | 203.4        | 0.74         | 1.9E-02        |
| pepT          | peptidase T                                                     | 342.2       | 314.7      | 335.7       | 358.7        | 403.2        | 333.2        | 1.10         | 2.5E-01        |
| gcvT          | aminomethyltransferase                                          | 333.2       | 284.5      | 332.6       | 381.6        | 432.5        | 387.0        | 1.27         | 4.3E-02        |
| BF1291        | putative transmembrane protein                                  | 3.1         | 4.4        | 4.0         | 4.8          | 4.1          | 5.4          | 1.24         | 2.3E-01        |
| BF1292        | hypothetical protein                                            | 2.7         | 4.1        | 3.5         | 5.0          | 3.9          | 3.5          | 1.22         | 3.7E-01        |
| BF1293        | putative Na <sup>+</sup> /H <sup>+</sup> family transporter     | 108.5       | 108.3      | 110.9       | 79.5         | 79.6         | 84.2         | 0.74         | 9.0E-04        |
| BF1294        | putative transmembrane protein                                  | 375.8       | 376.5      | 363.9       | 269.0        | 273.3        | 261.7        | 0.72         | 4.2E-04        |
| BF1295        | hypothetical protein                                            | 348.7       | 337.2      | 344.8       | 283.0        | 291.1        | 323.7        | 0.87         | 5.3E-02        |
| rmlD          | putative dTDP-dehydrorhamnose reductase                         | 307.2       | 300.4      | 303.4       | 235.4        | 231.7        | 256.1        | 0.79         | 6.1E-03        |
| prfC          | putative peptide chain release factor 3                         | 256.0       | 256.1      | 259.2       | 218.3        | 204.5        | 220.7        | 0.83         | 5.6E-03        |
| BF1298        | hypothetical protein                                            | 5.3         | 2.8        | 2.9         | 0.0          | 0.0          | 1.7          | 0.48         |                |
| BF1299        | putative haloacid dehalogenase-like hydrolase                   | 402.3       | 411.0      | 379.8       | 321.2        | 327.1        | 324.3        | 0.82         | 4.2E-03        |
| BF1300        | possible isochorismate synthase                                 | 206.3       | 201.8      | 184.5       | 191.9        | 157.4        | 219.0        | 0.95         | 7.1E-01        |
| menD          | putative menaquinone biosynthesis protein                       | 210.3       | 227.4      | 212.8       | 183.7        | 179.1        | 176.5        | 0.83         | 7.1E-03        |
| BF1302        | hypothetical protein                                            | 117.3       | 125.9      | 103.4       | 110.0        | 106.6        | 110.1        | 0.95         | 4.7E-01        |
| menB          | putative naphthoate synthase                                    | 187.8       | 205.0      | 160.9       | 235.3        | 202.3        | 273.1        | 1.28         | 1.4E-01        |
| BF1304        | putative muconate cycloisomerase                                | 91.3        | 94.6       | 72.4        | 72.3         | 66.5         | 86.3         | 0.87         | 3.7E-01        |
| menE          | putative O-succinylbenzoate--CoA ligase                         | 60.3        | 61.9       | 51.3        | 45.2         | 47.2         | 56.9         | 0.86         | 2.3E-01        |
| BF1306        | putative endonuclease/exonuclease/phosphatase family protein    | 41.1        | 35.4       | 38.0        | 52.4         | 55.0         | 53.7         | 1.41         | 5.6E-03        |
| BF1307        | putative alpha-glucosidase protein                              | 30.8        | 27.9       | 32.1        | 45.9         | 48.0         | 51.3         | 1.60         | 3.5E-03        |
| BF1308        | putative RNA polymerase ECF-type sigma factor                   | 63.2        | 46.9       | 62.5        | 113.7        | 94.7         | 97.6         | 1.78         | 1.7E-02        |
| BF1309        | putative anti-sigma factor                                      | 196.8       | 190.4      | 180.4       | 571.4        | 489.1        | 703.1        | 3.07         | 2.3E-03        |
| <b>BF1310</b> | <b>putative outer membrane protein</b>                          | <b>11.4</b> | <b>9.9</b> | <b>10.6</b> | <b>201.1</b> | <b>161.4</b> | <b>202.0</b> | <b>17.64</b> | <b>9.6E-05</b> |
| BF1311        | hypothetical protein possible endo-beta-N-acetylglucosaminidase | 6.9         | 6.8        | 5.9         | 127.4        | 96.5         | 145.7        | 18.67        | 3.0E-04        |
| BF1312        | hypothetical protein                                            | 6.0         | 4.5        | 3.7         | 114.7        | 80.9         | 135.8        | 23.33        | 8.2E-04        |
| BF1313        | hypothetical protein                                            | 7.4         | 6.2        | 7.3         | 123.6        | 105.8        | 134.6        | 17.34        | 1.1E-04        |
| BF1314        | hypothetical protein                                            | 10.8        | 10.4       | 11.7        | 162.5        | 132.8        | 189.3        | 14.62        | 2.3E-04        |
| BF1315        | putative transmembrane protein                                  | 59.8        | 64.3       | 60.8        | 126.3        | 131.8        | 126.7        | 2.08         | 1.6E-04        |
| BF1316        | hypothetical protein                                            | 128.1       | 129.4      | 140.2       | 408.1        | 407.6        | 425.3        | 3.12         | 7.9E-05        |
| BF1317        | putative DNA-binding protein                                    | 532.7       | 760.7      | 682.1       | 2400.6       | 3679.8       | 2265.2       | 4.17         | 5.4E-03        |
| oxyR          | redox-sensitive transcriptional activator                       | 141.4       | 139.1      | 131.4       | 160.2        | 138.8        | 177.5        | 1.15         | 1.9E-01        |
| BF1319        | hypothetical protein                                            | 129.6       | 130.6      | 141.7       | 163.7        | 171.5        | 132.9        | 1.16         | 2.1E-01        |
| BF1320        | putative RNA polymerase ECF-type sigma factor                   | 48.5        | 48.9       | 47.1        | 46.6         | 41.7         | 54.0         | 0.98         | 8.3E-01        |
| BF1321        | hypothetical protein                                            | 94.9        | 95.0       | 94.2        | 93.6         | 88.8         | 110.3        | 1.03         | 7.6E-01        |



|        |                                                                   |        |        |        |        |        |        |      |         |
|--------|-------------------------------------------------------------------|--------|--------|--------|--------|--------|--------|------|---------|
| pflA   | putative pyruvate formate-lyase 1 activating enzyme               | 456.2  | 522.2  | 490.6  | 256.2  | 265.4  | 238.3  | 0.52 | 1.2E-03 |
| pflB   | putative formate acetyltransferase 1                              | 1750.5 | 1918.1 | 1819.6 | 1079.5 | 1004.9 | 948.1  | 0.55 | 1.3E-03 |
| BF1324 | hypothetical protein                                              | 1.1    | 0.0    | 1.2    | 0.0    | 0.0    | 0.0    |      |         |
| BFt16  | tRNA-Ser-TGA                                                      | 21.8   | 34.2   | 22.9   | 23.6   | 14.4   | 91.6   | 1.22 | 7.9E-01 |
| BF1325 | hypothetical protein                                              | 1.7    | 0.0    | 0.0    | 0.0    | 0.0    | 0.0    |      |         |
| BF1326 | putative transmembrane protein                                    | 35.3   | 46.0   | 38.5   | 39.4   | 44.5   | 47.1   | 1.10 | 4.5E-01 |
| BF1327 | hypothetical protein                                              | 5.1    | 4.4    | 4.8    | 11.4   | 12.7   | 10.3   | 2.40 | 1.4E-03 |
| BF1329 | hypothetical protein                                              | 30.7   | 20.4   | 31.0   | 18.2   | 47.4   | 28.2   | 1.08 | 8.5E-01 |
| BF1330 | hypothetical protein                                              | 36.9   | 57.7   | 64.8   | 30.6   | 42.7   | 18.8   | 0.56 | 1.7E-01 |
| BF1331 | hypothetical protein                                              | 0.9    | 0.0    | 0.0    | 0.0    | 0.0    | 0.0    |      |         |
| BF1332 | putative alpha-glucosidase II                                     | 55.0   | 46.9   | 50.0   | 96.0   | 93.8   | 84.4   | 1.81 | 2.8E-03 |
| BF1333 | hypothetical protein                                              | 5641.3 | 5431.5 | 5702.8 | 2092.2 | 1956.3 | 1836.3 | 0.35 | 2.0E-04 |
| BF1334 | putative transmembrane CorC/HlyC family transporter               | 674.5  | 691.5  | 588.0  | 354.4  | 407.5  | 392.5  | 0.59 | 4.8E-03 |
| BF1335 | putative peptidase                                                | 83.3   | 82.5   | 73.0   | 167.7  | 145.9  | 142.9  | 1.91 | 2.7E-03 |
| BF1336 | putative TonB dependent outer membrane protein                    | 48.3   | 49.5   | 42.8   | 45.5   | 45.2   | 45.5   | 0.97 | 6.1E-01 |
| BF1337 | hypothetical protein                                              | 63.7   | 61.3   | 54.6   | 40.5   | 55.0   | 39.8   | 0.75 | 1.0E-01 |
| BF1338 | putative esterase                                                 | 68.1   | 59.8   | 57.7   | 79.8   | 75.1   | 74.4   | 1.24 | 3.5E-02 |
| BF1340 | hypothetical protein                                              | 102.1  | 101.6  | 98.8   | 78.0   | 72.3   | 59.7   | 0.69 | 2.2E-02 |
| BF1341 | hypothetical protein                                              | 0.8    | 1.8    | 1.9    | 0.0    | 0.0    | 0.0    |      |         |
| metY   | putative O-acetylhomoserine sulfhydrylase                         | 7.0    | 5.3    | 3.0    | 1.6    | 1.7    | 2.8    | 0.41 | 7.0E-02 |
| trmU   | tRNA (5-methylaminomethyl-2-thiouridylate)-methyltransferase      | 22.6   | 21.2   | 24.5   | 8.8    | 6.2    | 8.3    | 0.34 | 3.3E-03 |
| BF1344 | putative transcriptional regulatory protein                       | 180.6  | 161.4  | 174.8  | 124.6  | 116.0  | 118.8  | 0.70 | 3.3E-03 |
| BF1345 | hypothetical protein                                              | 2069.7 | 2234.8 | 2097.2 | 603.9  | 517.8  | 567.4  | 0.26 | 1.9E-04 |
| BF1346 | putative transmembrane Na <sup>+</sup> /H <sup>+</sup> antiporter | 83.8   | 87.5   | 80.2   | 49.4   | 43.5   | 46.6   | 0.55 | 1.2E-03 |
| BF1347 | putative transmembrane protein                                    | 124.8  | 110.0  | 112.4  | 85.9   | 79.7   | 83.9   | 0.72 | 6.0E-03 |
| BF1348 | putative transmembrane protein                                    | 45.2   | 43.3   | 43.9   | 37.8   | 37.6   | 40.6   | 0.88 | 2.1E-02 |
| BF1349 | putative transmembrane transporter permease protein               | 95.4   | 98.2   | 99.3   | 93.0   | 92.7   | 95.8   | 0.96 | 1.1E-01 |
| BF1350 | putative penicillin-binding protein                               | 46.9   | 51.2   | 41.9   | 53.2   | 51.2   | 54.5   | 1.14 | 1.5E-01 |
| BF1351 | putative outer membrane protein                                   | 150.3  | 142.8  | 131.4  | 183.0  | 184.0  | 162.8  | 1.25 | 3.3E-02 |
| BF1352 | putative ATP-binding PP-loop protein                              | 58.4   | 54.5   | 51.4   | 95.3   | 90.4   | 77.5   | 1.60 | 8.5E-03 |
| BF1353 | putative transmembrane ferrous transport fusion protein           | 215.7  | 160.3  | 159.8  | 130.1  | 143.8  | 124.2  | 0.75 | 9.0E-02 |
| BF1354 | hypothetical protein                                              | 83.7   | 49.3   | 61.1   | 24.3   | 24.0   | 27.8   | 0.40 | 1.2E-02 |
| BFt17  | tRNA-Cys-GCA                                                      | 12.3   | 23.5   | 29.7   | 4.6    | 11.3   | 14.1   | 0.44 | 1.9E-01 |
| BF1355 | hypothetical protein                                              | 8.2    | 4.3    | 3.6    | 1.5    | 0.0    | 1.6    | 0.31 | 3.5E-02 |
| BF1356 | possible cell division protein                                    | 113.8  | 100.4  | 130.3  | 95.5   | 115.3  | 81.5   | 0.84 | 3.2E-01 |
| BF1357 | hypothetical protein                                              | 23.7   | 18.7   | 21.6   | 14.7   | 11.9   | 20.8   | 0.72 | 2.0E-01 |
| BF1358 | hypothetical protein                                              | 9.0    | 11.2   | 6.6    | 0.0    | 1.7    | 1.4    | 0.18 | 7.5E-03 |
| BF1359 | hypothetical protein                                              | 80.6   | 61.0   | 60.3   | 451.9  | 454.5  | 315.8  | 6.03 | 1.7E-03 |
| BF1360 | hypothetical protein                                              | 35.5   | 39.5   | 34.9   | 84.8   | 66.7   | 82.0   | 2.12 | 3.7E-03 |
| BF1361 | hypothetical protein                                              | 71.2   | 78.2   | 62.1   | 79.1   | 72.7   | 73.3   | 1.07 | 4.8E-01 |
| BF1362 | hypothetical protein                                              | 146.9  | 144.9  | 130.1  | 144.6  | 117.5  | 151.1  | 0.97 | 8.2E-01 |
| BF1363 | hypothetical protein                                              | 82.2   | 91.3   | 75.8   | 89.2   | 69.1   | 100.1  | 1.03 | 8.7E-01 |

|        |                                                                                                                            |       |       |       |       |       |       |      |         |
|--------|----------------------------------------------------------------------------------------------------------------------------|-------|-------|-------|-------|-------|-------|------|---------|
| BF1364 | hypothetical protein                                                                                                       | 36.0  | 36.4  | 21.3  | 20.8  | 24.4  | 30.3  | 0.82 | 4.7E-01 |
| upaY   | putative LPS biosynthesis related transcriptional regulatory protein                                                       | 700.0 | 657.1 | 683.2 | 328.4 | 401.5 | 380.6 | 0.54 | 2.8E-03 |
| upaZ   | putative LPS biosynthesis related transcriptional regulatory protein                                                       | 648.9 | 641.5 | 660.4 | 459.0 | 480.6 | 383.9 | 0.68 | 1.2E-02 |
| wzx3   | putative LPS biosynthesis related flippase                                                                                 | 323.9 | 350.8 | 368.1 | 173.0 | 205.7 | 157.0 | 0.51 | 5.4E-03 |
| wcfM   | putative LPS biosynthesis related UDP-galactopyranose mutase                                                               | 285.7 | 240.5 | 314.3 | 179.5 | 207.5 | 165.1 | 0.66 | 3.1E-02 |
| wcfN   | putative LPS biosynthesis related glycosyltransferase                                                                      | 197.4 | 137.3 | 192.1 | 77.3  | 116.6 | 84.4  | 0.53 | 3.8E-02 |
| wzy3   | putative LPS biosynthesis related integral membrane protein                                                                | 138.2 | 108.6 | 141.3 | 58.8  | 80.5  | 61.0  | 0.51 | 1.7E-02 |
| wcfO   | hypothetical protein                                                                                                       | 304.6 | 271.3 | 332.2 | 185.3 | 218.0 | 177.9 | 0.64 | 1.6E-02 |
| wcfP   | putative glycosyltransferase                                                                                               | 289.7 | 256.0 | 330.0 | 175.3 | 232.1 | 170.8 | 0.66 | 4.9E-02 |
| wcfQ   | putative glycosyltransferase                                                                                               | 341.1 | 278.4 | 366.0 | 195.0 | 236.7 | 188.2 | 0.63 | 2.8E-02 |
| wcfR   | putative DegT/DnrJ/EryC1/StrS family amino sugar synthetase                                                                | 304.0 | 259.9 | 291.1 | 204.8 | 229.7 | 245.8 | 0.79 | 5.6E-02 |
| wcfS   | undecaprenyl-phosphate galactose phosphotransferase                                                                        | 441.7 | 382.1 | 413.1 | 276.2 | 327.3 | 289.6 | 0.72 | 1.8E-02 |
| BF118  | tRNA-Thr-TGT                                                                                                               | 106.9 | 167.4 | 100.1 | 178.8 | 143.3 | 310.0 | 1.64 | 2.1E-01 |
| pdiA   | hypothetical protein                                                                                                       | 267.8 | 234.5 | 227.8 | 293.6 | 267.9 | 343.7 | 1.24 | 1.1E-01 |
| BF1379 | putative transmembrane sodium/sulfate transporter                                                                          | 292.6 | 295.2 | 267.3 | 280.8 | 263.3 | 299.9 | 0.99 | 8.4E-01 |
| BF1380 | putative methyltransferase protein                                                                                         | 301.6 | 307.3 | 247.1 | 287.3 | 251.2 | 350.5 | 1.03 | 8.3E-01 |
| BF1381 | hypothetical protein                                                                                                       | 220.3 | 164.8 | 171.7 | 140.7 | 134.0 | 182.7 | 0.82 | 2.7E-01 |
| BF1382 | putative lactoylglutathione lyase                                                                                          | 431.2 | 407.4 | 413.1 | 530.2 | 542.6 | 413.6 | 1.18 | 1.9E-01 |
| BF1383 | hypothetical protein                                                                                                       | 261.5 | 242.9 | 216.5 | 277.3 | 254.4 | 270.2 | 1.11 | 2.0E-01 |
| BF1384 | hypothetical protein                                                                                                       | 154.1 | 157.2 | 129.8 | 106.7 | 117.9 | 101.4 | 0.74 | 3.2E-02 |
| pdxH   | putative pyridoxamine 5'-phosphate oxidase                                                                                 | 80.7  | 98.9  | 81.2  | 21.7  | 21.4  | 23.4  | 0.26 | 4.7E-04 |
| BF1386 | hypothetical protein                                                                                                       | 276.1 | 290.2 | 268.4 | 79.2  | 68.4  | 71.1  | 0.26 | 1.8E-04 |
| BF1387 | putative transmembrane AraC family transcriptional regulator                                                               | 8.6   | 6.9   | 8.2   | 8.9   | 7.2   | 9.1   | 1.06 | 6.6E-01 |
| BF1388 | hypothetical protein                                                                                                       | 113.1 | 136.5 | 133.1 | 41.6  | 42.1  | 46.5  | 0.34 | 7.3E-04 |
| ldhA   | D-lactate dehydrogenase                                                                                                    | 875.8 | 984.3 | 920.6 | 268.0 | 277.4 | 251.7 | 0.29 | 1.6E-04 |
| BF1390 | putative outer membrane protein                                                                                            | 434.8 | 491.7 | 540.3 | 459.6 | 452.0 | 494.3 | 0.96 | 6.6E-01 |
| BF1393 | hypothetical protein                                                                                                       | 75.9  | 79.9  | 75.3  | 23.3  | 17.7  | 18.9  | 0.26 | 7.1E-04 |
| BF1394 | putative RNA polymerase ECF-type sigma factor                                                                              | 174.4 | 146.4 | 161.1 | 513.3 | 754.3 | 573.0 | 3.78 | 2.2E-03 |
| BF1395 | putative transmembrane protein                                                                                             | 64.5  | 59.3  | 45.7  | 34.6  | 29.4  | 29.3  | 0.56 | 1.8E-02 |
| BF1396 | putative ExsB family protein                                                                                               | 73.8  | 61.7  | 56.8  | 41.0  | 38.4  | 42.1  | 0.64 | 1.3E-02 |
| BF1397 | putative GTP-cyclohydrolase protein                                                                                        | 133.1 | 128.0 | 116.3 | 96.1  | 82.0  | 92.4  | 0.72 | 1.5E-02 |
| BF1398 | hypothetical protein                                                                                                       | 101.3 | 88.7  | 89.4  | 128.1 | 119.8 | 156.1 | 1.44 | 3.2E-02 |
| BF1399 | hypothetical protein                                                                                                       | 397.4 | 367.3 | 313.0 | 291.9 | 253.7 | 392.0 | 0.86 | 4.3E-01 |
| nadC   | putative nicotinate-nucleotide pyrophosphorylase [carboxylating] (quinolinate phosphoribosyltransferase [decarboxylating]) | 581.0 | 532.5 | 533.6 | 661.8 | 642.3 | 738.4 | 1.24 | 2.9E-02 |
| BF1401 | putative RNA polymerase ECF-type sigma factor                                                                              | 329.2 | 312.8 | 213.1 | 128.0 | 90.1  | 179.3 | 0.45 | 5.5E-02 |

|        |                                                         |       |       |       |       |       |       |      |         |
|--------|---------------------------------------------------------|-------|-------|-------|-------|-------|-------|------|---------|
| BF1402 | hypothetical protein                                    | 278.3 | 262.7 | 225.8 | 118.9 | 100.7 | 144.6 | 0.47 | 9.8E-03 |
| BF1403 | hypothetical protein                                    | 327.8 | 347.6 | 343.9 | 188.4 | 190.4 | 192.7 | 0.56 | 1.3E-04 |
| BF1404 | hypothetical protein                                    | 82.6  | 78.8  | 68.1  | 30.6  | 27.5  | 40.1  | 0.42 | 7.5E-03 |
| BF1405 | putative dioxygenase                                    | 428.2 | 443.9 | 344.8 | 242.3 | 184.6 | 336.6 | 0.61 | 9.8E-02 |
| ald    | putative alanine dehydrogenase                          | 36.6  | 42.8  | 37.6  | 26.5  | 26.1  | 38.4  | 0.77 | 1.7E-01 |
| BF1407 | putative peptidase                                      | 83.6  | 88.8  | 72.1  | 92.6  | 69.8  | 114.4 | 1.11 | 6.0E-01 |
| BF1408 | putative dipeptidase                                    | 170.0 | 188.6 | 163.7 | 172.1 | 171.5 | 166.6 | 0.98 | 7.0E-01 |
| BF1409 | putative phosphoglucomutase                             | 592.8 | 556.3 | 560.5 | 600.7 | 658.9 | 649.2 | 1.12 | 6.1E-02 |
| BF1411 | hypothetical protein                                    | 25.5  | 18.8  | 19.5  | 15.4  | 21.3  | 23.1  | 0.93 | 7.3E-01 |
|        | putative RNA polymerase ECF-type                        |       |       |       |       |       |       |      |         |
| BF1412 | sigma factor                                            | 165.5 | 135.8 | 165.8 | 131.1 | 145.7 | 122.2 | 0.86 | 1.9E-01 |
| BF1413 | putative anti-sigma factor                              | 45.6  | 46.5  | 46.3  | 42.0  | 47.6  | 41.6  | 0.95 | 3.4E-01 |
| BF1415 | putative outer membrane protein                         | 6.5   | 7.6   | 7.7   | 12.6  | 13.9  | 13.0  | 1.81 | 2.6E-03 |
| BF1416 | putative outer membrane protein                         | 4.3   | 3.0   | 3.0   | 6.6   | 9.3   | 6.0   | 2.13 | 2.8E-02 |
| BF1417 | hypothetical protein                                    | 3.7   | 5.2   | 6.7   | 11.1  | 9.9   | 10.9  | 2.11 | 2.9E-02 |
| BF1418 | putative alpha-galactosidase                            | 1.5   | 1.7   | 1.6   | 3.1   | 5.3   | 4.2   | 2.55 | 1.1E-02 |
| BF1419 | hypothetical protein                                    | 2.5   | 0.9   | 1.8   | 0.8   | 1.9   | 1.6   | 0.84 | 7.5E-01 |
| BF1421 | putative histidine decarboxylase                        | 121.0 | 127.6 | 112.0 | 29.8  | 25.7  | 33.2  | 0.25 | 6.1E-04 |
| BF1422 | putative NADH pyrophosphatase                           | 50.3  | 46.3  | 41.9  | 47.6  | 32.6  | 39.8  | 0.86 | 3.5E-01 |
| BF1423 | putative ATP-binding ABC transporter protein            | 5.0   | 5.0   | 7.1   | 1.4   | 1.7   | 1.3   | 0.26 | 2.9E-03 |
| BF1424 | putative pyridine nucleotide-disulfide oxidoreductase   | 530.0 | 651.4 | 525.6 | 229.8 | 197.3 | 246.0 | 0.39 | 2.8E-03 |
| BF1425 | putative transmembrane protein                          | 69.6  | 67.2  | 66.4  | 124.0 | 150.1 | 127.2 | 1.97 | 2.0E-03 |
| BF1426 | putative AraC family transcriptional regulatory protein | 112.2 | 109.8 | 110.9 | 219.6 | 234.5 | 216.3 | 2.01 | 1.7E-04 |
| cdd    | putative cytidine deaminase                             | 131.0 | 143.5 | 111.4 | 263.2 | 234.8 | 235.7 | 1.91 | 5.2E-03 |
| BF1428 | putative hemagglutinin                                  | 156.5 | 128.3 | 118.3 | 79.7  | 74.0  | 114.0 | 0.66 | 8.9E-02 |
| BF1429 | hypothetical protein                                    | 19.3  | 16.1  | 13.0  | 11.9  | 10.7  | 22.6  | 0.89 | 7.4E-01 |
| BF1430 | putative ABC transporter component protein              | 13.4  | 12.0  | 9.8   | 5.8   | 3.9   | 6.0   | 0.44 | 1.7E-02 |
| BF1431 | putative permease component of ABC transporter          | 1.7   | 3.3   | 1.5   | 0.9   | 0.8   | 0.9   | 0.44 | 4.9E-02 |
| BF1432 | putative ABC transporter permease component             | 2.1   | 2.8   | 2.6   | 0.5   | 1.0   | 1.1   | 0.33 | 2.1E-02 |
| BF1433 | putative ABC transporter permease component             | 1.3   | 1.7   | 1.0   | 0.8   | 0.8   | 0.8   | 0.58 | 3.8E-02 |
| BF1434 | putative ABC transporter permease component             | 2.9   | 3.1   | 3.2   | 1.2   | 1.3   | 1.3   | 0.41 | 4.1E-04 |
| BF1435 | putative ABC transporter permease component             | 2.8   | 2.4   | 1.8   | 1.3   | 1.1   | 1.0   | 0.49 | 2.0E-02 |
| BF1436 | putative ABC transporter permease component             | 8.5   | 8.6   | 8.2   | 10.9  | 9.5   | 9.4   | 1.18 | 5.1E-02 |
| BF1437 | putative AraC family transcriptional regulator          | 52.2  | 53.6  | 56.1  | 98.1  | 107.4 | 81.3  | 1.76 | 7.9E-03 |
| BF1438 | putative ATP-binding component of ABC transporter       | 1.1   | 0.8   | 0.6   | 0.0   | 0.3   | 0.0   | 0.38 |         |
| BF1439 | putative ABC transporter permease component             | 1.0   | 1.2   | 1.1   | 0.0   | 0.5   | 0.3   | 0.33 | 6.2E-02 |
| BF1443 | putative ABC transport system ATP-binding protein       | 5.6   | 5.1   | 4.4   | 1.5   | 1.2   | 1.0   | 0.25 | 2.3E-03 |

|        |                                                                    |       |       |       |       |       |       |      |         |
|--------|--------------------------------------------------------------------|-------|-------|-------|-------|-------|-------|------|---------|
| BF1444 | hypothetical protein                                               | 4.1   | 4.7   | 3.6   | 1.6   | 1.9   | 2.9   | 0.50 | 4.4E-02 |
| BF1445 | putative ABC transporter permease component                        | 4.1   | 2.7   | 1.9   | 1.7   | 2.8   | 2.0   | 0.75 | 4.1E-01 |
| BF1446 | putative ABC transporter permease component                        | 1.8   | 2.6   | 2.5   | 1.6   | 1.8   | 1.5   | 0.72 | 8.1E-02 |
| BF1447 | putative two-component system sensor histidine kinase              | 35.2  | 36.8  | 34.9  | 47.0  | 44.5  | 46.4  | 1.29 | 2.1E-03 |
| BF1448 | hypothetical protein                                               | 6.5   | 10.0  | 5.2   | 12.3  | 12.9  | 19.7  | 2.11 | 6.6E-02 |
| BF1449 | putative outer membrane protein                                    | 2.8   | 2.1   | 2.5   | 0.4   | 0.8   | 0.3   | 0.18 | 1.7E-02 |
| BF1451 | putative two component sensor histidine kinase protein             | 44.2  | 44.7  | 40.6  | 24.2  | 23.5  | 23.6  | 0.55 | 4.8E-04 |
| BF1452 | aspartate aminotransferase                                         | 90.6  | 97.9  | 80.7  | 38.4  | 31.3  | 34.8  | 0.39 | 1.7E-03 |
| BF1453 | putative transmembrane protein                                     | 50.6  | 59.1  | 46.1  | 17.7  | 12.3  | 20.9  | 0.32 | 8.3E-03 |
| BF1454 | putative transmembrane protein                                     | 20.0  | 19.8  | 20.9  | 14.0  | 13.7  | 20.3  | 0.78 | 1.7E-01 |
| BF1457 | putative type I restriction enzyme                                 | 82.7  | 81.1  | 89.6  | 79.9  | 85.3  | 75.1  | 0.95 | 4.0E-01 |
| BF1458 | putative type I RM modification enzyme                             | 130.7 | 123.8 | 135.3 | 120.7 | 129.9 | 106.7 | 0.91 | 2.9E-01 |
| BF1459 | putative DNA-binding protein                                       | 113.6 | 118.9 | 129.7 | 99.2  | 109.1 | 87.1  | 0.81 | 8.6E-02 |
| BF1460 | hypothetical protein                                               | 63.6  | 63.4  | 66.1  | 49.8  | 53.9  | 55.7  | 0.82 | 1.5E-02 |
| BF1461 | putative type I restriction enzyme specificity protein             | 47.8  | 46.3  | 49.7  | 40.7  | 43.8  | 37.7  | 0.85 | 4.7E-02 |
| BF1464 | hypothetical protein                                               | 0.0   | 5.5   | 0.0   | 1.6   | 0.0   | 0.0   | 0.30 |         |
| BF1465 | hypothetical protein                                               | 2.0   | 0.5   | 2.2   | 1.0   | 2.3   | 1.9   | 1.22 | 7.8E-01 |
| BF1466 | hypothetical protein                                               | 0.0   | 2.7   | 0.0   | 1.2   | 1.5   | 0.0   | 0.49 |         |
| BF1467 | hypothetical protein                                               | 0.4   | 0.4   | 0.8   | 1.0   | 0.8   | 0.7   | 1.75 | 1.6E-01 |
| BF1468 | putative bacteriophage-related replication protein                 | 1.7   | 3.0   | 1.4   | 2.1   | 0.9   | 4.7   | 1.07 | 9.2E-01 |
| BF1469 | putative transmembrane protein                                     | 0.9   | 2.4   | 0.7   | 1.8   | 0.7   | 0.9   | 0.92 | 8.9E-01 |
| BF1470 | putative DNA primase                                               | 3.1   | 2.9   | 2.3   | 1.8   | 0.9   | 2.6   | 0.59 | 2.4E-01 |
| BF1471 | hypothetical protein                                               | 0.7   | 1.0   | 2.1   | 0.7   | 0.6   | 1.6   | 0.73 | 6.0E-01 |
| BF1473 | hypothetical protein                                               | 1.4   | 2.1   | 1.8   | 1.1   | 0.3   | 2.1   | 0.52 | 3.8E-01 |
| BF1474 | hypothetical protein                                               | 1.0   | 0.0   | 0.6   | 1.0   | 0.6   | 1.0   | 1.09 | 8.6E-01 |
| BF1475 | hypothetical protein                                               | 1.2   | 0.7   | 0.7   | 1.2   | 0.0   | 2.4   | 2.03 | 2.4E-01 |
| BF1476 | hypothetical protein                                               | 0.6   | 4.1   | 0.0   | 1.2   | 1.5   | 2.5   | 1.01 | 9.9E-01 |
| BF1477 | hypothetical protein                                               | 9.8   | 9.4   | 11.9  | 12.1  | 5.7   | 8.5   | 0.81 | 4.8E-01 |
| BF1478 | hypothetical protein                                               | 0.3   | 1.8   | 0.7   | 0.3   | 0.4   | 1.0   | 0.65 | 5.7E-01 |
| BF1479 | hypothetical protein                                               | 2.4   | 1.9   | 1.3   | 1.7   | 0.0   | 1.7   | 0.94 | 7.9E-01 |
| BF1480 | hypothetical protein                                               | 3.6   | 2.4   | 4.3   | 3.1   | 3.8   | 2.5   | 0.92 | 7.6E-01 |
| BF1481 | hypothetical protein                                               | 2.1   | 2.2   | 1.3   | 2.2   | 1.4   | 2.1   | 1.02 | 9.6E-01 |
| BF1482 | hypothetical protein                                               | 2.0   | 1.5   | 1.8   | 0.4   | 1.2   | 1.0   | 0.43 | 1.2E-01 |
| BF1483 | hypothetical protein                                               | 1.6   | 2.9   | 2.6   | 0.9   | 1.5   | 1.9   | 0.58 | 1.9E-01 |
| BF1484 | hypothetical protein                                               | 3.0   | 2.8   | 1.7   | 1.0   | 0.9   | 1.5   | 0.46 | 5.2E-02 |
| BF1485 | hypothetical protein                                               | 2.2   | 2.8   | 2.4   | 1.7   | 0.8   | 3.8   | 0.69 | 5.4E-01 |
| BF1486 | putative transmembrane protein                                     | 2.3   | 3.6   | 0.6   | 0.5   | 1.3   | 3.3   | 0.77 | 7.8E-01 |
| BF1487 | putative transmembrane protein                                     | 2.6   | 2.2   | 0.6   | 2.0   | 1.2   | 0.5   | 0.71 | 6.8E-01 |
| BF1488 | putative conserved protein found in conjugate transposon           | 1.6   | 2.2   | 1.0   | 0.9   | 0.8   | 1.4   | 0.65 | 2.7E-01 |
| BF1489 | putative conserved TraI-like protein found in conjugate transposon | 0.3   | 1.8   | 0.4   | 0.0   | 0.4   | 0.6   | 0.83 | 8.1E-01 |
| BF1490 | putative transmembrane protein                                     | 2.0   | 1.6   | 1.9   | 0.7   | 0.3   | 0.9   | 0.32 | 6.1E-02 |
| BF1491 | putative transmembrane protein                                     | 1.9   | 2.3   | 1.8   | 1.0   | 0.0   | 0.8   | 0.45 | 3.1E-02 |

|               |                                                                        |            |            |            |             |             |             |              |                |
|---------------|------------------------------------------------------------------------|------------|------------|------------|-------------|-------------|-------------|--------------|----------------|
| BF1492        | conserved hypothetical TraM-like protein found in conjugate transposon | 0.2        | 1.7        | 1.0        | 0.3         | 0.0         | 1.2         | 0.95         | 9.7E-01        |
| BF1493        | hypothetical protein                                                   | 2.5        | 3.9        | 6.7        | 12.8        | 2.8         | 9.4         | 1.74         | 4.4E-01        |
| BF1494        | putative transmembrane protein                                         | 28.3       | 28.0       | 32.9       | 34.6        | 35.0        | 34.7        | 1.17         | 6.7E-02        |
| BF1495        | conserved hypothetical TraN-like protein found in conjugate transposon | 1.5        | 1.6        | 0.5        | 0.9         | 0.4         | 1.0         | 0.63         | 4.8E-01        |
| BF1496        | putative peptidase                                                     | 1.9        | 2.7        | 0.4        | 0.9         | 0.4         | 2.5         | 0.77         | 8.1E-01        |
| BF1497        | hypothetical protein                                                   | 0.5        | 1.1        | 0.6        | 0.0         | 0.0         | 1.0         | 1.44         |                |
| BF1498        | putative DNA-binding protein                                           | 0.6        | 0.0        | 0.6        | 0.5         | 0.7         | 0.0         | 1.00         | 9.9E-01        |
| BF1499        | hypothetical protein                                                   | 6.5        | 5.2        | 6.7        | 4.2         | 4.3         | 3.8         | 0.67         | 2.2E-02        |
| BF1500        | hypothetical protein                                                   | 111.8      | 110.8      | 83.9       | 97.8        | 85.0        | 118.1       | 0.98         | 9.2E-01        |
| BF1501        | hypothetical protein                                                   | 68.3       | 65.9       | 48.8       | 77.9        | 57.8        | 88.6        | 1.22         | 3.6E-01        |
| BF1502        | putative protein involved in partitioning                              | 68.1       | 51.5       | 48.5       | 50.1        | 32.8        | 89.1        | 0.95         | 9.0E-01        |
| BF1503        | hypothetical protein                                                   | 5.8        | 8.5        | 7.2        | 3.4         | 7.6         | 5.6         | 0.74         | 3.8E-01        |
| BF1504        | hypothetical protein                                                   | 2.7        | 2.4        | 2.1        | 1.8         | 1.4         | 2.8         | 0.81         | 4.4E-01        |
| BF1505        | hypothetical protein                                                   | 0.0        | 1.2        | 0.0        | 0.0         | 1.3         | 1.0         | 0.99         |                |
| BF1506        | hypothetical protein                                                   | 1.9        | 2.0        | 1.0        | 0.9         | 1.1         | 1.8         | 0.77         | 4.9E-01        |
| BF1507        | hypothetical protein                                                   | 0.0        | 1.3        | 0.0        | 1.2         | 0.0         | 0.0         | 0.89         |                |
| cbh           | putative choloylglycine hydrolase                                      | 463.5      | 478.5      | 429.2      | 93.7        | 88.8        | 100.3       | 0.21         | 1.0E-04        |
| BF1509        | hypothetical protein                                                   | 234.8      | 287.8      | 256.1      | 36.0        | 45.6        | 39.5        | 0.16         | 3.7E-04        |
| BF1510        | hypothetical protein                                                   | 1.9        | 3.1        | 4.1        | 18.0        | 17.4        | 16.7        | 6.00         | 4.8E-03        |
| BF1511        | putative outer membrane protein                                        | 2.8        | 2.5        | 1.5        | 56.5        | 48.4        | 44.9        | 22.41        | 7.2E-04        |
| <b>BF1512</b> | <b>putative outer membrane protein</b>                                 | <b>1.0</b> | <b>1.1</b> | <b>1.2</b> | <b>51.7</b> | <b>45.2</b> | <b>42.6</b> | <b>42.22</b> | <b>2.4E-05</b> |
| BF1513        | putative anti-sigma factor                                             | 5.3        | 4.5        | 3.2        | 14.0        | 8.3         | 8.1         | 2.29         | 4.2E-02        |
| BF1514        | putative RNA polymerase ECF-type sigma factor                          | 9.9        | 7.3        | 7.9        | 41.8        | 42.0        | 37.4        | 4.85         | 6.8E-04        |
| BF1516        | hypothetical protein                                                   | 3.5        | 3.7        | 2.9        | 1.7         | 1.0         | 3.8         | 0.55         | 2.7E-01        |
| BF1517        | hypothetical protein                                                   | 2.3        | 3.8        | 1.9        | 3.3         | 2.6         | 3.9         | 1.26         | 4.6E-01        |
| BF1518        | hypothetical protein                                                   | 2.9        | 2.3        | 1.7        | 2.0         | 1.6         | 2.8         | 0.92         | 7.8E-01        |
| BF1519        | hypothetical protein                                                   | 0.5        | 0.0        | 0.0        | 0.9         | 0.6         | 1.4         | 1.85         |                |
| mobC          | mobilisation protein C                                                 | 8.9        | 6.8        | 7.0        | 5.0         | 4.3         | 9.6         | 0.79         | 4.8E-01        |
| mobB          | mobilisation protein B                                                 | 32.1       | 25.9       | 23.5       | 42.4        | 38.0        | 56.2        | 1.67         | 4.8E-02        |
| mobA          | mobilisation protein A                                                 | 31.8       | 25.6       | 25.0       | 49.3        | 42.5        | 54.9        | 1.78         | 1.4E-02        |
| BF1523        | hypothetical protein                                                   | 0.0        | 0.0        | 0.0        | 0.0         | 0.0         | 0.0         |              |                |
| BF1524        | hypothetical protein                                                   | 45.6       | 47.9       | 41.7       | 22.8        | 23.8        | 27.0        | 0.54         | 3.1E-03        |
| BF1525        | hypothetical protein                                                   | 8032.9     | 11179.6    | 10507.3    | 8148.4      | 9011.1      | 16349.0     | 1.08         | 8.0E-01        |
| BF1526        | hypothetical protein                                                   | 25.2       | 15.4       | 26.1       | 16.7        | 12.4        | 10.3        | 0.59         | 1.2E-01        |
| BF1527        | putative cation efflux protein                                         | 15.2       | 18.0       | 18.4       | 6.1         | 5.2         | 7.9         | 0.37         | 6.0E-03        |
| satG          | putative acetyltransferase                                             | 6.0        | 4.9        | 6.0        | 2.2         | 1.0         | 1.6         | 0.27         | 1.4E-02        |
| rteA          | putative two component system sensor kinase                            | 3.6        | 3.0        | 3.4        | 2.5         | 2.1         | 2.4         | 0.70         | 2.5E-02        |
| rteB          | putative two-component system response regulator                       | 12.4       | 14.2       | 9.7        | 7.8         | 4.9         | 15.0        | 0.70         | 4.2E-01        |
| BF1531        | hypothetical protein                                                   | 177.2      | 173.6      | 205.1      | 173.8       | 184.4       | 176.1       | 0.96         | 6.1E-01        |
| BF1532        | hypothetical protein                                                   | 433.4      | 402.9      | 462.4      | 407.8       | 453.3       | 351.6       | 0.93         | 5.1E-01        |
| BF1533        | putative integrase                                                     | 269.0      | 243.8      | 252.4      | 106.4       | 106.2       | 109.1       | 0.42         | 1.5E-04        |
| tnpA          | putative transposase for insertion sequence element IS21-like          | 16.7       | 15.8       | 10.3       | 8.1         | 6.8         | 11.7        | 0.62         | 1.4E-01        |
| tnpB          | insertion sequence IS21-like putative ATP-binding protein              | 5.3        | 5.2        | 5.9        | 5.7         | 4.6         | 4.7         | 0.91         | 3.6E-01        |
| BF1536        | hypothetical protein                                                   | 14.9       | 20.1       | 22.2       | 17.5        | 22.4        | 10.9        | 0.86         | 6.4E-01        |

|        |                                                                        |        |        |        |        |        |        |      |         |
|--------|------------------------------------------------------------------------|--------|--------|--------|--------|--------|--------|------|---------|
| BF1537 | putative type I restriction-modification specificity protein           | 12.8   | 15.4   | 14.2   | 5.1    | 7.0    | 5.9    | 0.42 | 4.4E-03 |
| BF1538 | putative phage integrase/recombinase                                   | 36.1   | 38.6   | 39.2   | 19.9   | 22.0   | 36.5   | 0.66 | 1.4E-01 |
| BF1539 | hypothetical protein                                                   | 405.2  | 418.5  | 397.2  | 200.7  | 246.7  | 214.4  | 0.54 | 2.7E-03 |
| BF1540 | hypothetical protein                                                   | 767.1  | 713.1  | 790.0  | 443.9  | 523.4  | 444.2  | 0.62 | 5.5E-03 |
| BF1541 | hypothetical protein                                                   | 418.4  | 340.3  | 435.3  | 283.5  | 350.4  | 308.2  | 0.79 | 1.2E-01 |
| BF1542 | hypothetical protein                                                   | 499.8  | 422.7  | 530.1  | 482.8  | 547.8  | 463.0  | 1.03 | 7.9E-01 |
| BF1543 | hypothetical protein                                                   | 232.7  | 213.1  | 272.2  | 309.4  | 409.6  | 295.2  | 1.40 | 8.6E-02 |
| BF1544 | hypothetical protein                                                   | 292.1  | 345.4  | 341.5  | 430.8  | 493.6  | 400.6  | 1.35 | 4.0E-02 |
| BF1545 | hypothetical protein                                                   | 13.8   | 12.2   | 13.3   | 21.9   | 23.8   | 18.0   | 1.62 | 1.5E-02 |
| BF1546 | hypothetical protein                                                   | 16.7   | 13.2   | 15.5   | 31.0   | 38.1   | 31.8   | 2.22 | 4.2E-03 |
| BF1547 | hypothetical protein                                                   | 0.8    | 1.6    | 2.5    | 0.0    | 0.0    | 0.7    | 0.50 |         |
| BF1548 | hypothetical protein                                                   | 3.7    | 2.6    | 4.0    | 3.5    | 1.4    | 1.2    | 0.53 | 2.1E-01 |
| upfY   | putative transcriptional regulator                                     | 5.6    | 5.9    | 5.8    | 1.4    | 2.4    | 3.7    | 0.40 | 5.4E-02 |
| upfZ   | putative transcriptional regulator                                     | 5.5    | 6.6    | 5.2    | 2.4    | 5.9    | 3.9    | 0.66 | 2.6E-01 |
| rmlA1  | putative glucose-1-phosphate thymidyl transferase                      | 5.9    | 4.8    | 6.3    | 2.8    | 3.7    | 3.2    | 0.57 | 1.7E-02 |
| rmlC2  | putative dTDP-4-dehydrorhamnose 3,5 epimerase                          | 5.5    | 3.9    | 5.4    | 2.0    | 2.5    | 2.4    | 0.47 | 1.1E-02 |
| BF1553 | hypothetical protein                                                   | 7.0    | 5.1    | 9.2    | 1.7    | 2.0    | 2.1    | 0.28 | 7.0E-03 |
| BF1554 | putative nucleotide-sugar dehydrogenase                                | 6.7    | 7.1    | 9.6    | 4.2    | 5.4    | 4.5    | 0.61 | 4.0E-02 |
| BF1555 | putative dNTP-hexose dehydratase-epimerase                             | 10.8   | 14.5   | 15.2   | 6.7    | 6.7    | 5.6    | 0.47 | 1.0E-02 |
| BF1556 | putative polysaccharide transporter/flippase                           | 8.2    | 7.3    | 6.9    | 3.4    | 3.4    | 2.1    | 0.39 | 1.2E-02 |
| BF1557 | putative glucosyltransferase                                           | 6.9    | 5.3    | 8.6    | 2.7    | 2.6    | 2.9    | 0.41 | 9.7E-03 |
| BF1558 | putative glycosyltransferase protein                                   | 6.6    | 5.3    | 5.5    | 3.8    | 6.0    | 3.1    | 0.72 | 2.4E-01 |
| BF1559 | hypothetical protein                                                   | 6.5    | 3.5    | 6.9    | 2.6    | 2.8    | 1.8    | 0.43 | 5.5E-02 |
| BF1560 | putative glycosyltransferase                                           | 3.8    | 4.0    | 5.6    | 1.3    | 2.0    | 1.5    | 0.36 | 1.4E-02 |
| BF1561 | putative transmembrane protein                                         | 5.0    | 3.5    | 6.5    | 1.8    | 2.0    | 0.4    | 0.24 | 8.1E-02 |
| BF1562 | putative glycosyltransferase O-antigen related protein                 | 4.3    | 4.6    | 6.2    | 2.1    | 1.8    | 2.0    | 0.40 | 5.7E-03 |
| BF1563 | putative lipopolysaccharide biosynthesis glycosyltransferase           | 10.8   | 8.5    | 13.8   | 4.1    | 3.2    | 2.7    | 0.30 | 8.8E-03 |
| BF1564 | putative DNTP-hexose dehydratase-epimerase                             | 8.3    | 6.0    | 5.8    | 2.9    | 4.0    | 4.5    | 0.57 | 5.5E-02 |
| BF1565 | putative glycosyltransferase                                           | 4.3    | 4.4    | 4.3    | 0.5    | 1.5    | 1.8    | 0.26 | 4.5E-02 |
| rne    | putative ribonuclease E                                                | 844.5  | 888.4  | 888.4  | 663.1  | 649.7  | 618.9  | 0.74 | 1.7E-03 |
| BF1567 | hypothetical protein                                                   | 2449.5 | 2294.6 | 3294.8 | 1898.9 | 1979.2 | 1483.4 | 0.67 | 8.0E-02 |
| hup1   | putative histone-like DNA-binding protein HU1                          | 3130.8 | 2905.8 | 3720.6 | 2000.2 | 2103.6 | 1755.9 | 0.60 | 1.3E-02 |
| BF1569 | putative A/G-specific adenine glycosylase                              | 91.9   | 80.0   | 76.3   | 79.9   | 72.2   | 86.3   | 0.96 | 6.9E-01 |
| BF1570 | putative arylsulfatase                                                 | 99.5   | 106.5  | 99.3   | 194.2  | 197.0  | 182.4  | 1.88 | 4.4E-04 |
| ssb    | putative single-strand binding protein                                 | 385.6  | 363.5  | 359.0  | 423.0  | 433.5  | 411.9  | 1.15 | 1.7E-02 |
| BF1572 | putative transmembrane CorC/HlyC family transporter associated protein | 202.7  | 206.7  | 209.9  | 238.7  | 263.6  | 244.0  | 1.20 | 1.2E-02 |
| BF1573 | hypothetical protein                                                   | 170.7  | 167.4  | 181.9  | 174.7  | 184.0  | 200.1  | 1.07 | 2.7E-01 |
| BF1574 | hypothetical protein                                                   | 68.7   | 57.1   | 55.9   | 49.5   | 52.0   | 76.0   | 0.96 | 8.5E-01 |
| BF1577 | hypothetical protein                                                   | 17.4   | 14.6   | 19.1   | 3.3    | 2.8    | 3.5    | 0.19 | 6.8E-04 |

|           |                                                                              |       |        |        |        |        |        |      |         |
|-----------|------------------------------------------------------------------------------|-------|--------|--------|--------|--------|--------|------|---------|
| BF1578    | hypothetical protein                                                         | 12.4  | 16.9   | 16.6   | 2.2    | 2.5    | 1.9    | 0.14 | 7.8E-04 |
| BF1579    | hypothetical protein                                                         | 12.2  | 12.4   | 11.9   | 2.4    | 3.0    | 2.6    | 0.22 | 2.1E-04 |
| BF1580    | hypothetical protein                                                         | 19.8  | 23.7   | 27.8   | 10.9   | 11.1   | 11.6   | 0.48 | 5.9E-03 |
| BF1581    | hypothetical protein                                                         | 261.5 | 304.9  | 336.8  | 355.1  | 364.7  | 281.0  | 1.11 | 4.8E-01 |
| BF1582    | hypothetical protein                                                         | 104.8 | 123.2  | 109.7  | 168.6  | 147.3  | 178.6  | 1.46 | 1.7E-02 |
| btuB      | putative vitamin B12 receptor                                                | 81.6  | 93.1   | 90.9   | 137.8  | 114.7  | 156.4  | 1.53 | 2.7E-02 |
| BF1584    | hypothetical protein                                                         | 817.7 | 1141.5 | 1023.0 | 1810.8 | 1464.6 | 2307.7 | 1.86 | 3.8E-02 |
| Cobalamin | RF00174                                                                      | 0.0   | 0.0    | 0.0    | 0.0    | 0.0    | 2.8    |      |         |
| BF1587    | hypothetical protein                                                         | 114.6 | 108.3  | 104.6  | 112.7  | 110.4  | 108.7  | 1.01 | 7.1E-01 |
| BF1588    | hypothetical protein                                                         | 44.4  | 45.0   | 42.9   | 47.2   | 45.2   | 55.6   | 1.11 | 2.3E-01 |
| BF1589    | putative two-component histidine kinase sensor protein                       | 32.5  | 40.3   | 36.7   | 29.7   | 31.8   | 33.5   | 0.87 | 1.7E-01 |
| BF1590    | putative two-component response regulator                                    | 69.0  | 79.4   | 71.8   | 69.3   | 71.1   | 73.1   | 0.97 | 6.1E-01 |
| BF1592    | hypothetical protein                                                         | 91.2  | 98.7   | 89.3   | 49.9   | 49.4   | 51.7   | 0.54 | 5.0E-04 |
| BF1593    | hypothetical protein                                                         | 426.4 | 361.1  | 394.4  | 266.4  | 274.4  | 294.3  | 0.71 | 1.0E-02 |
| BF1594    | hypothetical protein                                                         | 266.6 | 269.7  | 235.7  | 250.9  | 256.8  | 323.3  | 1.07 | 5.7E-01 |
| BF1595    | hypothetical protein                                                         | 187.7 | 162.2  | 154.8  | 225.4  | 209.0  | 238.5  | 1.34 | 2.9E-02 |
| BF1596    | putative ATP-binding component of ABC transporter                            | 190.1 | 198.9  | 189.7  | 235.3  | 230.6  | 227.7  | 1.20 | 2.6E-03 |
| BF1597    | possible histidinol-phosphatase                                              | 189.1 | 190.2  | 181.5  | 193.5  | 199.6  | 185.9  | 1.03 | 3.5E-01 |
| BF1598    | putative endo-beta-galactosidase                                             | 91.8  | 98.5   | 98.0   | 184.5  | 172.8  | 168.9  | 1.83 | 5.9E-04 |
| BF1599    | putative chondroitinase AC precursor                                         | 29.5  | 31.0   | 31.3   | 64.7   | 59.3   | 60.6   | 2.01 | 3.2E-04 |
| BF1600    | hypothetical protein                                                         | 178.9 | 190.3  | 162.2  | 139.5  | 137.5  | 135.4  | 0.78 | 1.5E-02 |
| BF1601    | aspartate aminotransferase                                                   | 235.6 | 265.9  | 260.4  | 248.9  | 248.2  | 254.9  | 0.99 | 8.2E-01 |
| BF1602    | putative transmembrane permease                                              | 160.3 | 175.5  | 167.3  | 149.4  | 142.6  | 149.2  | 0.88 | 2.6E-02 |
| BF1603    | putative transmembrane glycosyltransferase                                   | 120.5 | 124.3  | 118.4  | 103.1  | 106.4  | 121.4  | 0.91 | 1.9E-01 |
| BF1604    | putative transmembrane protein                                               | 167.3 | 198.6  | 185.2  | 98.4   | 109.8  | 104.4  | 0.57 | 2.9E-03 |
| BF1605    | putative two-component system sensor histidine kinase protein                | 7.5   | 7.7    | 9.0    | 24.1   | 21.7   | 25.0   | 2.94 | 8.5E-04 |
| BF1606    | putative two-component response regulator transcriptional regulatory protein | 16.5  | 16.6   | 13.4   | 28.0   | 19.5   | 30.1   | 1.65 | 5.3E-02 |
| BF1607    | putative outer membrane protein                                              | 0.5   | 0.6    | 0.7    | 0.4    | 0.8    | 0.4    | 0.80 | 4.9E-01 |
| BF1608    | putative HlyD-family transporter component                                   | 0.4   | 1.2    | 0.0    | 0.5    | 0.3    | 0.9    | 0.77 | 7.5E-01 |
| BF1609    | putative FtsX-related transporter permease                                   | 3.6   | 2.5    | 2.2    | 2.6    | 3.1    | 2.7    | 1.04 | 8.4E-01 |
| BF1610    | putative ABC transport system ATP-binding protein                            | 9.1   | 9.4    | 5.7    | 14.7   | 10.3   | 11.3   | 1.52 | 1.5E-01 |
| BF1611    | putative FtsX-related transmembrane transport protein                        | 22.4  | 22.5   | 20.2   | 16.1   | 17.0   | 16.6   | 0.76 | 6.5E-03 |
| ndh       | putative NADH dehydrogenase, FAD-containing subunit                          | 704.9 | 769.9  | 659.9  | 335.5  | 267.0  | 368.9  | 0.45 | 5.7E-03 |
| BF1613    | hypothetical protein                                                         | 45.7  | 59.1   | 61.2   | 38.2   | 27.7   | 30.3   | 0.58 | 3.0E-02 |
| bioD      | dithiobiotin synthetase                                                      | 7.4   | 9.9    | 8.8    | 18.8   | 14.0   | 20.0   | 2.01 | 1.7E-02 |
| BF1615    | putative biotin synthesis-related fusion protein                             | 2.6   | 2.2    | 2.0    | 4.9    | 5.3    | 3.7    | 2.03 | 1.7E-02 |
| bioF      | 8-amino-7-oxononanoate synthase                                              | 5.2   | 4.1    | 3.9    | 5.9    | 6.3    | 6.7    | 1.44 | 3.5E-02 |

|         |                                                                     |       |       |       |       |       |       |      |         |
|---------|---------------------------------------------------------------------|-------|-------|-------|-------|-------|-------|------|---------|
| bioA    | putative adenosylmethionine-8-amino-7-oxononanoate aminotransferase | 7.6   | 6.8   | 6.6   | 12.7  | 10.9  | 13.9  | 1.77 | 7.0E-03 |
| BF1618  | putative outer membrane receptor protein                            | 83.7  | 89.8  | 75.0  | 24.2  | 21.2  | 24.8  | 0.28 | 5.6E-04 |
| BF1619  | hypothetical protein                                                | 86.7  | 92.7  | 87.6  | 24.3  | 21.1  | 24.9  | 0.26 | 2.5E-04 |
| IctP    | putative L-lactate permease                                         | 70.8  | 82.5  | 69.2  | 33.2  | 41.0  | 35.1  | 0.49 | 4.1E-03 |
| BF1621  | hypothetical protein                                                | 180.7 | 210.5 | 188.0 | 59.8  | 50.8  | 53.5  | 0.28 | 4.6E-04 |
| BF1622  | hypothetical protein                                                | 222.8 | 251.2 | 222.4 | 56.9  | 48.8  | 46.5  | 0.22 | 3.6E-04 |
| BF1623  | putative propionyl-CoA carboxylase                                  | 65.3  | 84.8  | 63.1  | 48.9  | 39.0  | 61.5  | 0.69 | 1.3E-01 |
| accC1   | putative biotin carboxylase 1                                       | 26.0  | 29.0  | 29.7  | 29.4  | 26.9  | 39.2  | 1.11 | 4.9E-01 |
| BF1625  | putative biotin-requiring enzyme                                    | 24.2  | 16.1  | 14.1  | 14.3  | 16.3  | 23.9  | 1.01 | 9.8E-01 |
| BF1626  | hypothetical protein                                                | 13.8  | 17.2  | 13.5  | 4.0   | 3.1   | 3.1   | 0.23 | 1.3E-03 |
| BF1627  | hypothetical protein                                                | 148.0 | 152.4 | 149.4 | 31.5  | 35.1  | 36.4  | 0.23 | 1.0E-04 |
| BF1628  | putative ATP/GTP-binding protein                                    | 963.8 | 914.7 | 886.2 | 165.2 | 205.3 | 190.2 | 0.20 | 2.7E-04 |
| BF1629  | hypothetical protein                                                | 578.9 | 647.7 | 612.4 | 177.5 | 173.3 | 174.9 | 0.29 | 6.5E-05 |
| BF1630  | hypothetical protein                                                | 215.7 | 233.9 | 185.9 | 73.5  | 79.0  | 70.3  | 0.35 | 1.0E-03 |
| Ipd     | putative dihydrolipoamide dehydrogenase                             | 228.6 | 186.9 | 187.2 | 56.0  | 56.6  | 86.4  | 0.32 | 6.5E-03 |
| IplA    | putative lipoate-protein ligase                                     | 214.4 | 199.5 | 206.8 | 73.6  | 62.6  | 82.2  | 0.35 | 1.3E-03 |
| BF1635  | putative dihydrolipoamide acetyltransferase                         | 499.3 | 603.4 | 447.7 | 260.9 | 197.4 | 363.5 | 0.52 | 5.2E-02 |
| BF1636  | putative 2-oxoisovalerate dehydrogenase, alpha and beta subunits    | 218.3 | 265.7 | 214.4 | 86.0  | 85.4  | 98.8  | 0.39 | 1.8E-03 |
| BF1637  | flavodoxin                                                          | 255.1 | 298.0 | 266.7 | 119.4 | 110.0 | 120.9 | 0.43 | 7.6E-04 |
| prmA    | ribosomal protein L11 methyltransferase                             | 152.2 | 142.5 | 142.7 | 142.2 | 125.3 | 149.0 | 0.95 | 4.9E-01 |
| BF1639  | hypothetical protein                                                | 26.2  | 23.3  | 26.5  | 5.6   | 5.6   | 5.6   | 0.22 | 7.1E-05 |
| BF1640  | hypothetical protein                                                | 144.1 | 155.1 | 186.8 | 279.1 | 287.2 | 234.8 | 1.65 | 1.7E-02 |
| BF1641  | hypothetical protein                                                | 167.2 | 160.3 | 174.3 | 335.7 | 372.2 | 282.1 | 1.96 | 4.9E-03 |
| BF1642  | hypothetical protein                                                | 51.7  | 39.4  | 59.0  | 66.5  | 63.2  | 74.2  | 1.37 | 1.1E-01 |
| BF1643  | hypothetical protein                                                | 443.2 | 268.8 | 305.6 | 385.8 | 452.2 | 644.8 | 1.46 | 2.1E-01 |
| BF1644  | hypothetical protein                                                | 600.0 | 486.5 | 591.6 | 884.3 | 954.2 | 792.9 | 1.57 | 1.6E-02 |
| BF1645  | putative nucleotide deaminase                                       | 142.9 | 146.4 | 139.5 | 194.8 | 186.8 | 192.1 | 1.34 | 7.3E-04 |
| BF1646  | hypothetical protein                                                | 129.5 | 130.0 | 124.8 | 85.9  | 86.8  | 85.8  | 0.67 | 1.5E-04 |
| BF1647  | hypothetical protein                                                | 84.3  | 79.7  | 77.3  | 39.8  | 28.1  | 28.6  | 0.40 | 4.8E-03 |
| BF1648  | hypothetical protein                                                | 75.8  | 78.0  | 68.0  | 25.9  | 24.9  | 26.2  | 0.35 | 2.6E-04 |
| BF1649  | putative RNA polymerase ECF-type sigma factor                       | 105.8 | 108.2 | 83.0  | 33.0  | 27.0  | 41.8  | 0.34 | 6.7E-03 |
| BF1650  | putative GFO/IDH/MocA-family oxidoreductase                         | 122.1 | 127.4 | 118.5 | 135.7 | 118.2 | 133.6 | 1.05 | 4.3E-01 |
| BF1651  | putative solute-binding protein precursor                           | 45.6  | 47.5  | 47.8  | 69.7  | 55.7  | 77.6  | 1.43 | 4.2E-02 |
| BF1652  | hypothetical protein                                                | 140.5 | 143.2 | 132.0 | 132.5 | 118.4 | 122.7 | 0.90 | 9.5E-02 |
| BF1652A | putative 2-oxoglutarate synthase subunit                            | 805.6 | 790.8 | 820.5 | 605.8 | 579.0 | 576.4 | 0.73 | 6.4E-04 |
| BF1653  | putative 2-oxoglutarate synthase subunit                            | 448.1 | 512.3 | 468.9 | 424.5 | 399.5 | 397.0 | 0.86 | 4.6E-02 |
| BF1655  | hypothetical protein                                                | 629.8 | 682.8 | 630.9 | 468.1 | 494.3 | 417.4 | 0.71 | 1.0E-02 |
| BF1656  | 2-oxoglutarate ferredoxin oxidoreductase                            | 448.4 | 489.9 | 426.5 | 478.1 | 415.2 | 480.3 | 1.01 | 9.5E-01 |



|        |                                          |        |        |        |        |        |        |      |         |
|--------|------------------------------------------|--------|--------|--------|--------|--------|--------|------|---------|
| BF1657 | putative ferredoxin                      | 338.2  | 338.3  | 305.1  | 303.7  | 297.5  | 323.7  | 0.94 | 3.1E-01 |
| BF1658 | hypothetical protein                     | 386.8  | 387.6  | 340.0  | 205.4  | 219.1  | 238.6  | 0.59 | 4.1E-03 |
| rpiB   | putative ribose 5-phosphate isomerase    | 377.2  | 420.2  | 363.6  | 283.0  | 275.7  | 330.0  | 0.76 | 3.7E-02 |
| tktB   | putative transketolase                   | 749.2  | 781.0  | 721.1  | 689.5  | 620.0  | 672.1  | 0.88 | 5.6E-02 |
| galK   | putative galactokinase                   | 519.7  | 550.7  | 556.0  | 1770.2 | 1888.3 | 1760.0 | 3.33 | 5.8E-05 |
|        | putative transmembrane                   |        |        |        |        |        |        |      |         |
| BF1662 | glucose/galactose transporter            | 451.6  | 493.6  | 501.0  | 1355.7 | 1417.5 | 1195.7 | 2.74 | 6.3E-04 |
| BF1663 | putative aldose 1-epimerase precursor    | 322.6  | 310.3  | 301.9  | 822.8  | 829.7  | 754.0  | 2.57 | 2.0E-04 |
|        | putative mannose-6-phosphate             |        |        |        |        |        |        |      |         |
| BF1664 | isomerase                                | 896.4  | 750.2  | 819.0  | 2225.3 | 2392.8 | 2272.7 | 2.80 | 4.9E-04 |
| BF1665 | hypothetical protein                     | 286.7  | 257.4  | 261.3  | 210.3  | 256.1  | 232.8  | 0.87 | 1.4E-01 |
| BF1666 | putative transmembrane protein           | 1647.4 | 1925.6 | 2028.0 | 1326.0 | 1766.0 | 1596.1 | 0.83 | 2.2E-01 |
| BF1667 | hypothetical protein                     | 4209.7 | 4193.5 | 4291.3 | 3562.1 | 3989.5 | 3284.0 | 0.85 | 7.8E-02 |
| BF1668 | putative ATP-dependent RNA helicase      | 619.9  | 620.7  | 642.1  | 192.1  | 198.4  | 229.4  | 0.33 | 4.0E-04 |
| BF1669 | putative short-chain dehydrogenase       | 247.2  | 234.2  | 245.5  | 239.7  | 247.5  | 249.6  | 1.01 | 6.2E-01 |
| BF1670 | hypothetical protein                     | 821.3  | 908.3  | 927.8  | 1072.3 | 1103.1 | 1135.3 | 1.25 | 1.5E-02 |
| BF1671 | hypothetical protein                     | 66.1   | 65.7   | 69.0   | 20.4   | 25.1   | 34.7   | 0.39 | 1.1E-02 |
| BF1672 | putative beta-galactosidase              | 51.4   | 58.2   | 54.2   | 49.4   | 52.8   | 48.0   | 0.92 | 1.8E-01 |
|        | putative sulfite synthesis pathway       |        |        |        |        |        |        |      |         |
| BF1673 | protein                                  | 224.9  | 209.5  | 200.9  | 220.7  | 207.5  | 233.1  | 1.04 | 5.1E-01 |
| BF1674 | possible Na+/sulfite symporter           | 113.0  | 98.1   | 99.8   | 113.4  | 103.0  | 100.0  | 1.02 | 8.1E-01 |
| cysC   | putative adenylsulfate kinase            | 96.2   | 83.5   | 90.3   | 139.2  | 139.5  | 145.9  | 1.58 | 2.3E-03 |
| cysD   | sulfate adenyltransferase subunit 2      | 141.6  | 135.0  | 134.4  | 154.4  | 157.9  | 156.5  | 1.14 | 6.0E-03 |
| cysN   | sulfate adenyltransferase subunit 1      | 254.9  | 237.3  | 247.1  | 215.0  | 230.3  | 221.0  | 0.90 | 4.2E-02 |
| BF1678 | possible sulfotransferase                | 159.7  | 156.0  | 151.8  | 122.2  | 135.1  | 115.6  | 0.80 | 2.0E-02 |
| BF1679 | hypothetical protein                     | 214.2  | 191.4  | 213.3  | 151.8  | 167.4  | 154.2  | 0.77 | 1.3E-02 |
| BF1680 | hypothetical protein                     | 85.8   | 80.0   | 76.9   | 49.0   | 65.5   | 72.1   | 0.76 | 1.3E-01 |
| BF1681 | putative outer membrane protein          | 4.8    | 9.7    | 8.6    | 3.5    | 3.3    | 4.5    | 0.50 | 7.4E-02 |
| BF1682 | hypothetical protein                     | 2.6    | 3.0    | 3.6    | 1.8    | 2.3    | 0.4    | 0.40 | 2.2E-01 |
| BF1683 | hypothetical protein                     | 3.3    | 4.1    | 2.6    | 2.3    | 2.8    | 2.8    | 0.79 | 2.5E-01 |
| BF1684 | hypothetical protein                     | 0.2    | 0.6    | 0.2    | 0.2    | 0.6    | 0.2    | 0.97 | 9.6E-01 |
| BF1685 | putative bacteriophage integrase         | 14.7   | 15.5   | 16.6   | 4.4    | 4.0    | 3.7    | 0.26 | 2.5E-04 |
| BF1686 | hypothetical protein                     | 249.7  | 193.5  | 221.4  | 203.5  | 228.8  | 204.6  | 0.96 | 7.2E-01 |
| BF1687 | hypothetical protein                     | 2766.1 | 3009.1 | 3078.3 | 3578.6 | 3687.3 | 2933.2 | 1.15 | 2.1E-01 |
| BF1688 | hypothetical protein                     | 2125.2 | 2310.3 | 2357.8 | 2591.3 | 2669.9 | 2225.7 | 1.10 | 2.8E-01 |
| BF1689 | putative outer membrane protein          | 2411.0 | 2638.9 | 2612.7 | 2701.0 | 2858.4 | 2530.8 | 1.06 | 3.7E-01 |
| ruvX   | Holliday junction resolvase-like protein | 226.0  | 233.1  | 214.8  | 127.9  | 125.9  | 154.3  | 0.60 | 6.2E-03 |
| def    | peptide deformylase                      | 453.4  | 403.8  | 456.9  | 410.7  | 404.9  | 373.3  | 0.91 | 1.7E-01 |
| BF1692 | hypothetical protein                     | 20.3   | 17.1   | 23.1   | 20.5   | 25.5   | 20.2   | 1.09 | 5.5E-01 |
|        | putative exported Tpr repeat-family      |        |        |        |        |        |        |      |         |
| BF1693 | protein                                  | 208.7  | 207.9  | 206.4  | 138.4  | 156.4  | 144.8  | 0.70 | 2.8E-03 |
| thrS   | putative threonyl-tRNA synthetase        | 761.8  | 733.7  | 750.5  | 784.6  | 788.8  | 725.0  | 1.02 | 5.6E-01 |
| infC   | translation initiation factor IF-3       | 1445.1 | 1331.3 | 1543.3 | 946.0  | 962.7  | 840.6  | 0.64 | 5.7E-03 |
| rpmI   | putative 50S ribosomal protein L35       | 4156.4 | 4778.5 | 4752.5 | 3443.6 | 3810.3 | 3647.1 | 0.80 | 2.9E-02 |
| rplT   | 50S ribosomal protein L20                | 4676.2 | 5137.1 | 5632.5 | 3948.4 | 4297.1 | 4350.1 | 0.82 | 5.5E-02 |
| BF1698 | putative ferredoxin                      | 303.9  | 257.4  | 274.3  | 176.1  | 208.4  | 191.3  | 0.69 | 1.4E-02 |
| BF1699 | xanthine phosphoribosyltransferase       | 133.7  | 128.1  | 140.4  | 190.4  | 214.7  | 194.8  | 1.49 | 3.7E-03 |
|        | putative phenylacetate-coenzyme A        |        |        |        |        |        |        |      |         |
| paaK2  | ligase                                   | 52.7   | 50.9   | 51.0   | 94.5   | 98.7   | 87.6   | 1.81 | 6.8E-04 |
|        | putative indolepyruvate oxidoreductase   |        |        |        |        |        |        |      |         |
| BF1701 | subunit                                  | 174.6  | 193.5  | 189.7  | 330.2  | 295.4  | 278.9  | 1.62 | 4.5E-03 |

|        |                                                                                 |            |            |            |               |               |              |               |                |
|--------|---------------------------------------------------------------------------------|------------|------------|------------|---------------|---------------|--------------|---------------|----------------|
| BF1702 | putative indolepyruvate oxidoreductase/indolepyruvate ferredoxin oxidoreductase | 184.2      | 184.4      | 190.2      | 304.1         | 285.6         | 252.7        | 1.50          | 6.0E-03        |
| BF1703 | putative aminodeoxychorismate lyase                                             | 51.5       | 55.0       | 55.0       | 52.4          | 49.0          | 40.9         | 0.88          | 2.2E-01        |
| BF1704 | putative endonuclease                                                           | 13.5       | 19.0       | 15.3       | 17.9          | 14.6          | 15.8         | 1.02          | 9.0E-01        |
| BF1705 | putative surface antigen                                                        | 249.9      | 259.7      | 269.8      | 117.4         | 128.1         | 113.6        | 0.46          | 4.9E-04        |
| BF1719 | tRNA-Thr-CGT                                                                    | 89.4       | 138.8      | 71.9       | 71.0          | 47.6          | 125.2        | 0.78          | 5.8E-01        |
| BF1706 | putative capsular biosynthesis protein                                          | 42.7       | 41.8       | 45.6       | 39.0          | 54.4          | 44.0         | 1.05          | 7.3E-01        |
| BF1707 | putative capsule polysaccharide export protein                                  | 273.0      | 204.1      | 251.8      | 180.4         | 195.8         | 186.8        | 0.78          | 8.0E-02        |
| BF1708 | hypothetical protein                                                            | 402.2      | 361.4      | 411.1      | 393.2         | 446.6         | 394.1        | 1.05          | 5.2E-01        |
| BF1709 | putative LPS-related regulatory protein                                         | 455.3      | 415.3      | 459.6      | 508.3         | 554.4         | 498.6        | 1.17          | 4.6E-02        |
| BF1710 | possible O-antigen related protein                                              | 373.4      | 386.7      | 406.2      | 408.6         | 425.7         | 382.6        | 1.04          | 4.2E-01        |
| BF1711 | putative ROK family transcriptional repressor protein                           | 232.5      | 218.6      | 246.2      | 286.1         | 345.7         | 264.9        | 1.28          | 7.6E-02        |
| BF1712 | putative N-acetylneuraminase lyase                                              | 67.9       | 61.9       | 65.8       | 596.6         | 714.8         | 524.8        | 9.32          | 2.6E-04        |
| BF1713 | hypothetical protein                                                            | 91.3       | 93.1       | 96.2       | 716.5         | 841.3         | 598.3        | 7.61          | 3.8E-04        |
| BF1714 | putative major facilitator superfamily transporter                              | 50.1       | 56.4       | 61.8       | 579.9         | 665.6         | 451.7        | 10.00         | 5.3E-04        |
| BF1715 | hypothetical protein                                                            | 33.9       | 38.6       | 40.0       | 526.0         | 613.3         | 418.5        | 13.71         | 3.3E-04        |
| BF1718 | hypothetical protein                                                            | 0.8        | 0.7        | 0.9        | 3.0           | 2.5           | 2.5          | 3.34          | 8.9E-04        |
| BF1719 | <b>putative outer membrane protein</b>                                          | <b>6.3</b> | <b>7.6</b> | <b>7.2</b> | <b>1087.2</b> | <b>1315.2</b> | <b>764.8</b> | <b>147.11</b> | <b>1.4E-04</b> |
| BF1720 | hypothetical protein                                                            | 10.4       | 9.4        | 9.8        | 1309.3        | 1571.9        | 918.1        | 125.55        | 1.3E-04        |
| BF1721 | hypothetical protein                                                            | 2.5        | 1.6        | 1.4        | 133.5         | 144.0         | 108.7        | 73.34         | 3.3E-04        |
| BF1722 | <b>putative outer membrane protein</b>                                          | <b>0.8</b> | <b>0.5</b> | <b>1.0</b> | <b>124.3</b>  | <b>126.0</b>  | <b>97.3</b>  | <b>156.16</b> | <b>2.1E-04</b> |
| BF1723 | hypothetical protein                                                            | 254.6      | 269.2      | 243.1      | 59.4          | 64.7          | 88.8         | 0.27          | 2.4E-03        |
| BF1724 | hypothetical protein                                                            | 13.0       | 15.4       | 8.4        | 19.4          | 21.1          | 22.0         | 1.74          | 6.8E-02        |
| BF1725 | hypothetical protein                                                            | 32.6       | 29.9       | 13.4       | 46.1          | 20.7          | 127.0        | 2.10          | 3.5E-01        |
| BF1726 | hypothetical protein                                                            | 45.6       | 42.3       | 32.9       | 74.1          | 65.7          | 111.2        | 2.04          | 3.6E-02        |
| BF1727 | putative AraC family transcriptional regulator                                  | 20.9       | 22.0       | 10.1       | 21.2          | 10.6          | 56.4         | 1.40          | 6.4E-01        |
| BF1728 | hypothetical protein                                                            | 5.1        | 5.4        | 2.3        | 5.0           | 2.9           | 17.8         | 1.60          | 5.5E-01        |
| BF1729 | hypothetical protein                                                            | 1.1        | 0.8        | 0.4        | 0.3           | 1.2           | 3.8          | 1.70          | 5.9E-01        |
| BF1730 | hypothetical protein                                                            | 0.7        | 1.1        | 0.1        | 0.8           | 0.1           | 3.5          | 1.59          | 7.8E-01        |
| BF1731 | hypothetical protein                                                            | 1.0        | 0.5        | 0.5        | 0.9           | 1.1           | 2.8          | 2.21          | 1.7E-01        |
| BF1732 | hypothetical protein                                                            | 9.0        | 5.7        | 5.5        | 1.7           | 3.3           | 11.4         | 0.61          | 5.1E-01        |
| BF1733 | hypothetical protein                                                            | 1266.2     | 1577.6     | 1572.0     | 463.3         | 610.8         | 514.0        | 0.36          | 3.0E-03        |
| BF1734 | hypothetical protein                                                            | 744.3      | 609.5      | 763.3      | 421.6         | 463.4         | 391.4        | 0.60          | 1.2E-02        |
| BF1735 | hypothetical protein                                                            | 1.1        | 1.6        | 0.4        | 0.7           | 0.0           | 5.0          | 2.09          | 6.1E-01        |
| top1   | putative DNA topoisomerase I                                                    | 1.2        | 1.1        | 0.5        | 1.2           | 0.6           | 1.9          | 1.30          | 6.5E-01        |
| BF1737 | hypothetical protein                                                            | 0.1        | 0.4        | 0.1        | 0.2           | 0.0           | 1.1          | 2.80          | 4.0E-01        |
| xerC   | putative tyrosine recombinase                                                   | 49.2       | 49.8       | 35.8       | 96.9          | 69.9          | 122.4        | 2.11          | 3.6E-02        |
| BF1739 | hypothetical protein                                                            | 63.3       | 61.8       | 60.3       | 102.5         | 114.4         | 91.1         | 1.65          | 5.8E-03        |
| BF1740 | hypothetical protein                                                            | 91.9       | 74.3       | 83.7       | 121.2         | 146.1         | 91.3         | 1.41          | 1.2E-01        |
| BF1741 | hypothetical protein                                                            | 85.0       | 68.1       | 82.0       | 117.0         | 134.6         | 104.8        | 1.51          | 2.9E-02        |
| BF1742 | hypothetical protein                                                            | 55.7       | 59.8       | 60.2       | 82.2          | 96.8          | 72.3         | 1.42          | 3.3E-02        |
| BF1743 | hypothetical protein                                                            | 61.7       | 46.9       | 57.0       | 94.1          | 102.7         | 73.9         | 1.63          | 3.6E-02        |
| BF1744 | hypothetical protein                                                            | 55.5       | 50.1       | 58.6       | 90.7          | 93.2          | 79.0         | 1.60          | 7.4E-03        |
| BF1745 | hypothetical protein                                                            | 62.6       | 58.2       | 67.8       | 108.1         | 138.8         | 90.2         | 1.76          | 2.7E-02        |
| BF1746 | hypothetical protein                                                            | 37.9       | 35.1       | 48.5       | 63.3          | 75.1          | 58.6         | 1.63          | 3.2E-02        |
| BF1747 | hypothetical protein                                                            | 35.9       | 32.4       | 38.1       | 58.0          | 62.4          | 51.4         | 1.61          | 8.5E-03        |

|        |                                                                          |      |      |      |      |      |      |      |         |
|--------|--------------------------------------------------------------------------|------|------|------|------|------|------|------|---------|
| BF1748 | hypothetical protein                                                     | 56.0 | 45.1 | 66.2 | 75.0 | 88.4 | 72.4 | 1.42 | 8.2E-02 |
| BF1749 | hypothetical protein                                                     | 50.9 | 48.2 | 44.2 | 92.0 | 84.9 | 79.3 | 1.79 | 2.8E-03 |
| BF1750 | hypothetical protein                                                     | 43.7 | 44.8 | 52.4 | 81.0 | 96.5 | 70.4 | 1.75 | 1.6E-02 |
| BF1751 | hypothetical protein                                                     | 32.8 | 30.5 | 38.5 | 58.9 | 67.2 | 45.0 | 1.67 | 3.9E-02 |
| BF1752 | hypothetical protein                                                     | 54.3 | 36.6 | 46.0 | 81.0 | 94.1 | 66.9 | 1.77 | 3.7E-02 |
| BF1753 | hypothetical protein                                                     | 26.9 | 29.8 | 35.9 | 66.9 | 71.8 | 59.3 | 2.15 | 5.6E-03 |
| BF1754 | hypothetical protein                                                     | 25.3 | 25.0 | 30.2 | 53.4 | 55.7 | 42.1 | 1.87 | 1.1E-02 |
| BF1755 | hypothetical protein                                                     | 15.9 | 16.9 | 17.5 | 32.9 | 30.6 | 24.3 | 1.73 | 1.2E-02 |
| BF1756 | hypothetical protein                                                     | 6.4  | 6.8  | 9.0  | 12.4 | 16.4 | 17.0 | 2.07 | 1.7E-02 |
| BF1757 | putative transmembrane protein                                           | 43.1 | 42.3 | 36.0 | 28.7 | 35.5 | 39.3 | 0.85 | 2.7E-01 |
| BF1758 | putative transmembrane TraG/TraD family mobilization protein             | 1.5  | 1.0  | 1.2  | 0.6  | 0.2  | 1.7  | 0.48 | 3.8E-01 |
| BF1759 | hypothetical protein                                                     | 0.0  | 0.1  | 0.5  | 0.3  | 0.2  | 0.5  | 1.09 | 9.3E-01 |
| BF1760 | hypothetical protein                                                     | 0.4  | 0.4  | 0.0  | 0.0  | 0.9  | 0.0  | 2.25 |         |
| BF1761 | hypothetical protein                                                     | 0.0  | 0.0  | 0.0  | 0.0  | 0.0  | 0.0  |      |         |
| traA   | putative conjugative transposon protein                                  | 0.2  | 0.2  | 0.0  | 0.2  | 0.0  | 0.0  | 0.92 |         |
| traB   | hypothetical protein                                                     | 0.0  | 0.0  | 0.0  | 0.0  | 0.0  | 0.0  |      |         |
| traD   | conserved hypothetical protein found in conjugate transposon             | 0.0  | 0.0  | 0.0  | 0.0  | 0.0  | 0.0  |      |         |
| traE   | putative transmembrane conserved protein found in conjugative transposon | 0.0  | 0.0  | 0.0  | 0.0  | 0.0  | 0.6  |      |         |
| traF   | putative transmembrane conserved protein found in conjugate transposon   | 0.0  | 0.0  | 0.0  | 0.0  | 0.0  | 0.0  |      |         |
| traG   | putative conserved protein found in conjugate transposon                 | 0.0  | 0.0  | 0.2  | 0.1  | 0.1  | 0.3  | 0.79 |         |
| traH   | conserved hypothetical protein found in conjugate transposon             | 0.0  | 0.0  | 0.0  | 0.0  | 0.0  | 0.0  |      |         |
| traI   | conserved protein found in conjugate transposon                          | 0.0  | 0.0  | 0.0  | 0.3  | 0.0  | 0.3  |      |         |
| traJ   | conserved transmembrane protein found in conjugative transposon          | 0.0  | 0.2  | 0.2  | 0.2  | 0.0  | 0.2  | 0.88 | 3.9E-02 |
| traK   | conserved hypothetical protein found in conjugate transposon             | 0.0  | 0.0  | 0.0  | 0.0  | 0.3  | 0.0  |      |         |
| traL   | conserved hypothetical protein found in conjugate transposon             | 0.0  | 0.7  | 0.0  | 0.0  | 0.0  | 0.0  |      |         |
| BF1773 | hypothetical protein                                                     | 0.0  | 0.0  | 0.0  | 0.0  | 0.0  | 0.5  |      |         |
| traM   | conserved protein found in conjugate transposon                          | 0.0  | 0.1  | 0.0  | 0.1  | 0.0  | 0.1  | 0.90 |         |
| traN   | conserved hypothetical protein found in conjugate transposon             | 0.0  | 0.0  | 0.0  | 0.0  | 0.2  | 0.0  |      |         |
| traO   | conserved hypothetical protein found in conjugate transposon             | 0.0  | 0.0  | 0.3  | 0.3  | 0.0  | 0.0  | 0.86 |         |
| traQ   | conserved protein found in conjugate transposon                          | 0.0  | 0.0  | 0.4  | 0.0  | 0.0  | 0.8  | 1.74 |         |
| BF1778 | hypothetical protein                                                     | 0.3  | 0.0  | 0.0  | 0.3  | 0.0  | 0.0  | 0.95 |         |
| BF1779 | hypothetical protein                                                     | 0.2  | 0.7  | 0.0  | 0.2  | 0.0  | 0.6  | 0.92 | 9.5E-01 |
| radC3  | putative DNA repair protein                                              | 0.0  | 0.4  | 0.0  | 0.0  | 0.0  | 0.0  |      |         |
| BF1781 | hypothetical protein                                                     | 0.3  | 0.3  | 0.6  | 0.3  | 0.0  | 0.6  | 1.02 | 9.8E-01 |
| BF1782 | putative ParB-family protein                                             | 0.5  | 0.3  | 0.5  | 0.4  | 0.2  | 0.3  | 0.71 | 2.1E-01 |
| BF1783 | hypothetical protein                                                     | 0.0  | 0.3  | 0.3  | 0.5  | 1.3  | 1.6  | 3.42 | 6.3E-02 |
| BF1784 | hypothetical protein                                                     | 0.3  | 0.3  | 0.0  | 0.0  | 0.0  | 0.8  | 2.79 |         |

|        |                                        |       |       |       |        |        |        |        |         |
|--------|----------------------------------------|-------|-------|-------|--------|--------|--------|--------|---------|
| BF1785 | putative DNA primase                   | 0.2   | 0.2   | 0.6   | 0.2    | 0.0    | 0.2    | 0.63   | 3.9E-01 |
| BF1786 | hypothetical protein                   | 0.0   | 0.4   | 0.5   | 0.0    | 0.0    | 0.0    |        |         |
| BF1787 | hypothetical protein                   | 31.6  | 30.1  | 28.8  | 56.1   | 63.5   | 44.7   | 1.80   | 1.3E-02 |
| BF1788 | hypothetical protein                   | 21.9  | 20.7  | 19.5  | 52.1   | 63.3   | 42.1   | 2.50   | 5.7E-03 |
| BF1789 | hypothetical protein                   | 10.7  | 9.2   | 10.5  | 33.7   | 33.5   | 40.1   | 3.52   | 6.4E-04 |
| BF1790 | putative ferredoxin                    | 5.1   | 4.3   | 2.7   | 5.5    | 5.7    | 8.3    | 1.64   | 1.5E-01 |
| BF1791 | putative transcriptional regulator     | 10.0  | 8.1   | 6.8   | 12.6   | 11.0   | 14.1   | 1.53   | 5.7E-02 |
| BF1792 | hypothetical protein                   | 17.3  | 17.9  | 11.8  | 20.7   | 15.7   | 62.7   | 1.77   | 3.4E-01 |
| BF1793 | hypothetical protein                   | 0.0   | 4.5   | 1.3   | 2.8    | 1.4    | 8.1    | 1.30   | 8.0E-01 |
| BF1794 | hypothetical protein                   | 3.9   | 3.0   | 0.0   | 2.1    | 1.9    | 12.8   | 1.10   | 9.1E-01 |
| BF1795 | putative bacteriophage integrase       | 20.0  | 23.0  | 11.1  | 28.3   | 19.4   | 45.1   | 1.69   | 2.5E-01 |
| BF1796 | putative alpha-L-fucosidase            | 36.9  | 31.5  | 36.9  | 59.3   | 68.6   | 49.6   | 1.68   | 2.0E-02 |
| BF1797 | putative outer membrane protein        | 2.2   | 2.5   | 1.2   | 5.3    | 4.8    | 4.2    | 2.51   | 3.6E-02 |
| BF1798 | putative outer membrane protein        | 0.9   | 0.3   | 0.2   | 3.9    | 3.2    | 2.6    | 7.67   | 1.6E-02 |
| BF1799 | putative ATP/GTP-binding protein       | 38.9  | 40.9  | 46.1  | 40.7   | 44.5   | 34.9   | 0.95   | 6.6E-01 |
| BF1800 | hypothetical protein                   | 12.3  | 20.5  | 14.5  | 12.5   | 14.2   | 16.0   | 0.92   | 7.0E-01 |
| BF1801 | hypothetical protein                   | 22.0  | 19.2  | 18.8  | 22.6   | 25.0   | 18.3   | 1.09   | 5.2E-01 |
| BF1802 | possible outer membrane protein        | 3.3   | 2.1   | 4.0   | 110.6  | 130.9  | 98.5   | 37.46  | 5.7E-04 |
| BF1803 | putative outer membrane protein        | 0.8   | 1.3   | 1.2   | 121.5  | 124.3  | 103.4  | 109.18 | 2.0E-04 |
|        | putative TonB-dependent outer          |       |       |       |        |        |        |        |         |
| BF1804 | membrane receptor protein              | 11.6  | 11.7  | 12.9  | 90.7   | 88.3   | 84.5   | 7.30   | 2.5E-05 |
| BF1805 | hypothetical protein                   | 12.0  | 9.3   | 12.5  | 78.5   | 76.8   | 72.5   | 6.78   | 4.0E-04 |
| nanH   | neuraminidase precursor                | 21.3  | 22.2  | 20.3  | 591.8  | 677.2  | 513.6  | 27.81  | 5.5E-05 |
| nahA   | beta-N-acetylhexosaminidase            | 14.1  | 13.6  | 15.3  | 264.5  | 314.3  | 235.0  | 18.82  | 1.1E-04 |
| estA   | sialate-O-acetyltransferase            | 119.8 | 118.3 | 105.8 | 237.6  | 265.6  | 208.1  | 2.06   | 3.5E-03 |
| estS   | sialate O-acylesterase                 | 174.3 | 174.1 | 170.8 | 355.4  | 415.0  | 330.6  | 2.11   | 1.9E-03 |
| bmnA   | beta-mannosidase                       | 159.6 | 154.3 | 161.6 | 263.1  | 321.6  | 300.0  | 1.85   | 2.4E-03 |
| nahB   | beta-N-acetylhexosaminidase            | 289.8 | 287.9 | 301.2 | 1193.1 | 1305.7 | 1015.5 | 3.98   | 4.9E-04 |
| BF1812 | putative lipoprotein                   | 75.6  | 72.1  | 74.7  | 142.0  | 153.3  | 129.0  | 1.90   | 1.4E-03 |
| nahC   | beta-N-acetylhexosaminidase            | 148.9 | 146.0 | 144.3 | 203.9  | 218.3  | 201.2  | 1.42   | 1.2E-03 |
| BF1814 | putative outer membrane protein        | 143.4 | 140.6 | 131.4 | 183.4  | 192.4  | 170.3  | 1.31   | 9.8E-03 |
| bgaA   | beta-galactosidase                     | 374.8 | 376.5 | 349.5 | 509.5  | 512.8  | 491.1  | 1.38   | 1.7E-03 |
| BF1816 | putative outer membrane protein        | 59.1  | 67.3  | 66.5  | 52.5   | 54.6   | 49.3   | 0.81   | 3.0E-02 |
| BF1817 | putative outer membrane protein        | 21.6  | 24.4  | 30.7  | 37.3   | 37.6   | 40.9   | 1.52   | 3.4E-02 |
| dnaJ   | putative chaperone protein             | 323.9 | 323.7 | 234.0 | 189.0  | 129.5  | 168.7  | 0.55   | 3.7E-02 |
| grpE   | putative GrpE protein (HSP70 cofactor) | 753.2 | 653.1 | 506.9 | 165.8  | 152.9  | 122.4  | 0.23   | 2.6E-03 |
| BF1820 | putative ABC transporter component     | 378.7 | 392.7 | 407.3 | 308.7  | 290.2  | 284.5  | 0.75   | 3.5E-03 |
|        | putative RNA polymerase ECF-type       |       |       |       |        |        |        |        |         |
| BF1821 | sigma factor                           | 49.1  | 54.2  | 46.9  | 23.7   | 17.4   | 25.5   | 0.44   | 8.2E-03 |
| BF1822 | putative transmembrane protein         | 34.6  | 33.7  | 44.1  | 22.1   | 19.3   | 22.4   | 0.57   | 1.2E-02 |
| BF1823 | putative transmembrane protein         | 67.5  | 58.5  | 64.9  | 46.9   | 46.4   | 46.7   | 0.73   | 6.2E-03 |
| BF1824 | hypothetical protein                   | 399.9 | 377.3 | 380.1 | 325.0  | 319.0  | 281.0  | 0.80   | 2.3E-02 |
| BF1825 | putative transmembrane protease        | 11.5  | 13.3  | 18.4  | 22.9   | 18.8   | 19.8   | 1.45   | 1.1E-01 |
| BF1826 | hypothetical protein                   | 1.8   | 2.1   | 1.5   | 1.1    | 1.1    | 2.0    | 0.75   | 3.5E-01 |
| BF1827 | hypothetical protein                   | 1.2   | 2.1   | 1.1   | 0.9    | 0.9    | 0.7    | 0.59   | 1.1E-01 |
| BF1828 | hypothetical protein                   | 46.0  | 38.9  | 40.6  | 34.1   | 37.0   | 36.7   | 0.86   | 9.3E-02 |
| BF1829 | putative transmembrane protein         | 5.9   | 5.6   | 6.5   | 2.5    | 3.8    | 6.4    | 0.66   | 2.6E-01 |
| BF1830 | hypothetical protein                   | 46.8  | 54.5  | 55.6  | 30.7   | 38.4   | 39.8   | 0.69   | 3.8E-02 |
| BF1831 | hypothetical protein                   | 141.6 | 110.1 | 133.1 | 107.4  | 105.9  | 88.8   | 0.79   | 1.1E-01 |
| BF1832 | hypothetical protein                   | 1.4   | 0.0   | 1.6   | 0.7    | 0.0    | 1.4    | 0.64   | 4.1E-01 |
| BF1833 | putative bacteriophage integrase       | 0.3   | 0.3   | 0.0   | 0.1    | 0.7    | 0.1    | 0.78   | 7.3E-01 |

|        |                                                                               |       |       |       |       |       |       |      |         |
|--------|-------------------------------------------------------------------------------|-------|-------|-------|-------|-------|-------|------|---------|
| BF1834 | hypothetical protein                                                          | 2.3   | 0.5   | 2.6   | 0.0   | 0.0   | 0.9   | 0.62 |         |
| hsdR   | putative type I restriction enzyme R protein                                  | 167.4 | 159.0 | 178.4 | 164.3 | 185.5 | 148.4 | 0.98 | 8.7E-01 |
| BF1837 | hypothetical protein                                                          | 106.1 | 102.9 | 108.6 | 95.5  | 107.0 | 81.2  | 0.89 | 2.8E-01 |
| hsdM   | putative type I restriction enzyme methylase                                  | 157.2 | 136.3 | 157.3 | 139.8 | 162.3 | 122.6 | 0.94 | 6.0E-01 |
| BF1839 | putative type I restriction enzyme, partial                                   | 28.7  | 27.2  | 34.0  | 36.0  | 31.8  | 25.0  | 1.03 | 8.8E-01 |
| BF1840 | putative type I restriction endonuclease specificity subunit, partial         | 0.6   | 2.0   | 2.7   | 2.6   | 1.3   | 0.5   | 0.83 | 8.3E-01 |
| BF1841 | putative type I restriction-modification system specificity system, partial   | 90.5  | 93.0  | 99.6  | 74.3  | 97.3  | 73.9  | 0.86 | 2.5E-01 |
| BF1842 | putative type IC restriction-modification system specificity subunit, partial | 33.9  | 25.6  | 28.8  | 29.7  | 26.2  | 25.4  | 0.93 | 5.4E-01 |
| BF1843 | putative phage integrase/recombinase                                          | 11.1  | 10.8  | 11.4  | 6.6   | 7.8   | 6.6   | 0.63 | 4.6E-03 |
| BF1844 | hypothetical protein                                                          | 0.0   | 1.9   | 1.0   | 0.0   | 0.0   | 0.0   |      |         |
| BF1845 | putative integrase/transposase                                                | 36.7  | 36.3  | 31.2  | 20.0  | 17.3  | 19.6  | 0.55 | 3.8E-03 |
| BF1846 | hypothetical protein                                                          | 2.5   | 0.9   | 0.0   | 0.8   | 0.0   | 0.0   | 0.53 |         |
| BF1847 | hypothetical protein                                                          | 0.9   | 1.3   | 0.3   | 0.3   | 0.7   | 0.9   | 0.77 | 7.0E-01 |
| BF1848 | hypothetical protein                                                          | 0.3   | 0.7   | 0.5   | 0.5   | 0.2   | 0.2   | 0.48 | 2.0E-01 |
| BF1849 | hypothetical protein                                                          | 0.2   | 0.3   | 0.7   | 0.1   | 0.4   | 0.1   | 0.61 | 4.6E-01 |
| BF1850 | hypothetical protein                                                          | 3.2   | 3.6   | 2.2   | 5.1   | 3.6   | 2.9   | 1.26 | 4.2E-01 |
| BF1851 | hypothetical protein                                                          | 0.6   | 0.4   | 0.4   | 0.4   | 0.0   | 0.4   | 0.79 | 1.7E-01 |
| BF1852 | possible ATP/GTP-binding chaperonin                                           | 0.7   | 0.8   | 0.7   | 0.1   | 0.5   | 0.5   | 0.41 | 2.4E-01 |
| BF1853 | hypothetical protein                                                          | 0.6   | 1.5   | 0.7   | 0.6   | 0.7   | 0.6   | 0.74 | 4.1E-01 |
| BF1854 | hypothetical protein                                                          | 0.0   | 0.2   | 0.0   | 0.2   | 0.2   | 0.3   | 1.20 |         |
| BF1855 | hypothetical protein                                                          | 0.7   | 1.0   | 0.8   | 0.4   | 0.6   | 0.7   | 0.65 | 1.9E-01 |
| BF1856 | hypothetical protein                                                          | 0.6   | 1.0   | 1.2   | 0.7   | 0.2   | 0.7   | 0.54 | 3.3E-01 |
| BF1857 | hypothetical protein                                                          | 1.2   | 1.3   | 0.4   | 0.0   | 0.0   | 1.2   | 1.38 |         |
| BF1858 | hypothetical protein                                                          | 0.7   | 1.0   | 0.6   | 0.3   | 0.6   | 0.5   | 0.65 | 1.8E-01 |
| BF1859 | hypothetical protein                                                          | 1.9   | 1.1   | 0.8   | 0.2   | 0.4   | 0.7   | 0.30 | 1.1E-01 |
| BF1860 | hypothetical protein                                                          | 0.2   | 0.7   | 0.2   | 0.6   | 0.4   | 0.8   | 2.08 | 2.9E-01 |
| BF1861 | hypothetical protein                                                          | 1.7   | 1.0   | 0.0   | 0.7   | 1.1   | 0.7   | 0.63 | 2.9E-01 |
| BF1862 | hypothetical protein                                                          | 2.1   | 2.1   | 1.4   | 0.2   | 0.8   | 0.6   | 0.26 | 6.1E-02 |
| BF1863 | hypothetical protein                                                          | 2.1   | 1.1   | 1.8   | 0.3   | 0.2   | 0.6   | 0.21 | 3.7E-02 |
| BF1864 | hypothetical protein                                                          | 0.9   | 1.4   | 0.8   | 0.2   | 1.3   | 0.4   | 0.43 | 3.0E-01 |
| BF1865 | hypothetical protein                                                          | 1.6   | 1.2   | 1.1   | 1.4   | 1.2   | 1.1   | 0.94 | 7.2E-01 |
| BF1866 | hypothetical protein                                                          | 1.9   | 1.8   | 1.8   | 0.5   | 0.9   | 0.4   | 0.30 | 2.0E-02 |
| BF1867 | hypothetical protein                                                          | 1.3   | 1.7   | 0.7   | 0.8   | 1.0   | 2.1   | 1.07 | 9.0E-01 |
| BF1868 | hypothetical protein                                                          | 0.9   | 1.6   | 0.8   | 0.4   | 0.5   | 1.2   | 0.61 | 3.5E-01 |
| BF1869 | hypothetical protein                                                          | 0.0   | 0.0   | 0.5   | 0.0   | 0.0   | 0.0   |      |         |
| BF1870 | hypothetical protein                                                          | 2.9   | 3.8   | 3.0   | 2.9   | 2.9   | 2.1   | 0.81 | 2.9E-01 |
| BF1871 | putative RNA-binding protein                                                  | 52.0  | 64.0  | 44.4  | 67.2  | 62.6  | 71.8  | 1.27 | 1.5E-01 |
| BF1872 | putative two-component histidine sensor kinase                                | 105.0 | 88.3  | 73.2  | 51.3  | 46.3  | 72.9  | 0.63 | 9.2E-02 |
| BF1873 | putative 2', 3'-cyclic nucleotide 2'-phosphodiesterase                        | 86.8  | 68.1  | 68.4  | 54.1  | 61.1  | 82.6  | 0.88 | 5.0E-01 |
| BF1874 | putative GAF-domain signal transduction protein                               | 52.9  | 39.2  | 49.2  | 40.6  | 46.1  | 58.2  | 1.02 | 9.1E-01 |
| BF1875 | hypothetical protein                                                          | 188.9 | 152.8 | 193.2 | 165.3 | 146.4 | 177.8 | 0.92 | 4.8E-01 |

|        |                                                                                     |        |        |        |       |       |        |      |         |
|--------|-------------------------------------------------------------------------------------|--------|--------|--------|-------|-------|--------|------|---------|
| BF1876 | putative TonB-dependent outer membrane protein                                      | 38.3   | 34.4   | 32.2   | 25.5  | 22.8  | 30.4   | 0.75 | 6.7E-02 |
| BF1877 | hypothetical protein                                                                | 153.1  | 135.0  | 145.9  | 163.7 | 157.1 | 177.7  | 1.15 | 8.8E-02 |
| BF1878 | putative DNA-binding cyclic-nucleotide binding protein                              | 35.8   | 31.6   | 37.1   | 141.7 | 118.3 | 126.5  | 3.70 | 5.0E-04 |
| BFt20  | tRNA-Ser-GCT                                                                        | 1243.3 | 1652.5 | 1422.6 | 797.7 | 824.2 | 2115.0 | 0.78 | 5.7E-01 |
| BFt21  | tRNA-Glu-CTC                                                                        | 56.5   | 72.6   | 67.4   | 84.7  | 95.3  | 252.8  | 1.95 | 1.9E-01 |
| BF1879 | putative transmembrane Na <sup>+</sup> driven efflux protein                        | 29.2   | 30.3   | 34.8   | 9.0   | 7.8   | 12.3   | 0.30 | 4.5E-03 |
| BF1881 | hypothetical protein                                                                | 75.4   | 65.9   | 66.1   | 296.7 | 306.7 | 246.9  | 4.09 | 5.7E-04 |
| BF1882 | putative transmembrane transport efflux protein                                     | 81.2   | 62.0   | 68.5   | 11.4  | 10.0  | 17.6   | 0.18 | 3.4E-03 |
| BF1883 | putative antiporter                                                                 | 147.2  | 144.2  | 137.1  | 101.9 | 93.7  | 129.2  | 0.75 | 7.4E-02 |
| BF1884 | hypothetical protein                                                                | 224.1  | 223.2  | 219.1  | 198.8 | 200.0 | 191.1  | 0.88 | 5.3E-03 |
| BF1885 | hypothetical protein                                                                | 147.0  | 131.3  | 134.6  | 134.2 | 131.4 | 138.4  | 0.98 | 6.7E-01 |
| BF1886 | hypothetical protein                                                                | 160.4  | 174.5  | 167.8  | 227.7 | 204.3 | 184.9  | 1.22 | 6.2E-02 |
| fcl    | putative GDP-L-fucose synthetase                                                    | 49.7   | 45.4   | 42.9   | 49.1  | 42.8  | 41.4   | 0.97 | 6.9E-01 |
| BF1888 | putative GDP mannose 4,6-dehydratase                                                | 59.6   | 60.3   | 48.8   | 51.7  | 43.6  | 45.1   | 0.83 | 1.5E-01 |
| BF1889 | hypothetical protein                                                                | 40.9   | 38.7   | 37.1   | 48.5  | 44.3  | 36.5   | 1.10 | 4.1E-01 |
| BF1890 | hypothetical protein                                                                | 3.3    | 2.8    | 3.4    | 1.7   | 2.0   | 0.8    | 0.45 | 7.2E-02 |
| BF1891 | hypothetical protein                                                                | 3.5    | 1.1    | 3.4    | 0.0   | 0.6   | 0.0    | 0.25 |         |
| BF1892 | hypothetical protein                                                                | 4.7    | 8.9    | 5.2    | 3.0   | 6.6   | 3.0    | 0.65 | 3.3E-01 |
| upbY   | putative LPS biosynthesis related transcriptional regulatory protein                | 314.9  | 294.6  | 324.9  | 169.5 | 165.0 | 156.7  | 0.53 | 5.7E-04 |
| upbZ   | putative LPS biosynthesis related transcriptional regulatory protein                | 265.0  | 252.2  | 242.7  | 153.8 | 155.1 | 140.4  | 0.59 | 1.3E-03 |
| wcfT   | putative LPS biosynthesis related membrane protein                                  | 171.6  | 166.3  | 163.1  | 113.3 | 119.0 | 105.9  | 0.67 | 2.2E-03 |
| wcfU   | putative glucose-1-P-cytidyltransferase                                             | 89.9   | 94.9   | 85.0   | 78.0  | 82.0  | 84.9   | 0.91 | 1.1E-01 |
| aepX   | putative LPS biosynthesis related phosphoenolpyruvate phosphomutase                 | 157.9  | 162.5  | 147.7  | 177.9 | 150.3 | 197.5  | 1.12 | 3.3E-01 |
| aepY   | putative LPS biosynthesis related phosphoenolpyruvate decarboxylase                 | 115.2  | 130.1  | 104.4  | 118.4 | 119.1 | 138.3  | 1.08 | 4.9E-01 |
| aepZ   | putative LPS biosynthesis related 2-aminoethylphosphonate pyruvate aminotransferase | 141.5  | 164.2  | 141.2  | 111.3 | 121.9 | 121.3  | 0.79 | 3.3E-02 |
| wzx    | putative LPS biosynthesis related flippase                                          | 66.7   | 75.0   | 81.2   | 38.5  | 46.8  | 31.6   | 0.52 | 1.6E-02 |
| wcfV   | hypothetical protein                                                                | 119.0  | 103.7  | 116.6  | 91.6  | 105.9 | 69.7   | 0.78 | 1.8E-01 |
| wcfW   | putative LPS biosynthesis related alpha-1,2-fucosyltransferase                      | 109.3  | 99.5   | 104.5  | 82.1  | 99.1  | 72.6   | 0.80 | 1.3E-01 |
| wcfX   | putative LPS biosynthesis related UDP-glucuronic acid epimerase                     | 105.1  | 99.8   | 110.5  | 91.0  | 99.3  | 92.0   | 0.90 | 8.4E-02 |
| wcfY   | putative LPS biosynthesis related UDP-glucose dehydrogenase                         | 117.6  | 102.4  | 117.1  | 100.2 | 102.7 | 96.9   | 0.89 | 1.2E-01 |
| wcfZ   | putative LPS biosynthesis related glycosyltransferase                               | 69.2   | 67.0   | 73.3   | 48.6  | 55.1  | 41.4   | 0.69 | 2.7E-02 |
| wcgQ   | putative LPS biosynthesis related glycosyltransferase                               | 108.0  | 109.4  | 107.5  | 65.3  | 80.2  | 60.3   | 0.63 | 1.4E-02 |

|        |                                                              |       |       |       |       |       |       |      |         |
|--------|--------------------------------------------------------------|-------|-------|-------|-------|-------|-------|------|---------|
| wzy    | putative LPS biosynthesis related polymerase                 | 59.6  | 60.9  | 63.0  | 31.1  | 39.0  | 25.1  | 0.51 | 1.5E-02 |
| wcgR   | putative LPS biosynthesis related glycosyltransferase        | 70.5  | 86.6  | 86.5  | 56.9  | 69.9  | 51.1  | 0.73 | 8.2E-02 |
| wcgS   | putative LPS biosynthesis related dehydratase                | 153.7 | 141.6 | 159.1 | 147.8 | 158.3 | 138.2 | 0.98 | 7.4E-01 |
| wcgT   | putative LPS biosynthesis related epimerase                  | 160.2 | 168.4 | 178.7 | 144.3 | 159.0 | 123.6 | 0.84 | 1.4E-01 |
| wcgU   | putative LPS biosynthesis related reductase                  | 122.5 | 118.0 | 128.0 | 106.7 | 122.7 | 105.0 | 0.91 | 2.0E-01 |
| wcgV   | putative LPS biosynthesis related glycosyltransferase        | 87.9  | 86.7  | 93.0  | 63.7  | 77.9  | 58.0  | 0.74 | 5.1E-02 |
| wcgW   | putative LPS biosynthesis related dehydratase                | 79.1  | 71.3  | 92.3  | 60.9  | 69.9  | 54.7  | 0.76 | 9.5E-02 |
| wcgX   | putative LPS biosynthesis related UndPP-QuiNAc-P-transferase | 51.2  | 46.4  | 55.8  | 26.0  | 28.4  | 26.2  | 0.53 | 2.1E-03 |
| BF1915 | hypothetical protein                                         | 33.1  | 24.4  | 29.3  | 14.8  | 22.3  | 11.5  | 0.54 | 7.6E-02 |
| BF1917 | hypothetical protein                                         | 39.1  | 33.3  | 33.6  | 15.2  | 14.7  | 13.6  | 0.41 | 9.2E-04 |
| BF1918 | putative transmembrane symporter                             | 23.3  | 28.3  | 24.1  | 32.3  | 36.9  | 33.6  | 1.36 | 2.7E-02 |
| gnd    | 6-phosphogluconate dehydrogenase                             | 391.5 | 330.4 | 315.5 | 115.0 | 117.9 | 171.1 | 0.38 | 8.0E-03 |
| zwf    | glucose-6-phosphate 1-dehydrogenase                          | 453.6 | 372.9 | 398.3 | 140.4 | 146.4 | 164.8 | 0.37 | 1.2E-03 |
| pgl    | putative 6-phosphogluconolactonase                           | 423.8 | 370.7 | 406.8 | 154.6 | 153.3 | 190.5 | 0.41 | 2.1E-03 |
| BF1922 | hypothetical protein                                         | 116.2 | 103.0 | 127.2 | 95.9  | 115.4 | 66.1  | 0.78 | 3.0E-01 |
| BF1923 | hypothetical protein                                         | 177.0 | 178.2 | 188.8 | 114.7 | 126.5 | 100.0 | 0.62 | 8.1E-03 |
| BF1924 | hypothetical protein                                         | 164.4 | 141.7 | 152.1 | 125.6 | 140.0 | 139.1 | 0.88 | 1.3E-01 |
| BF1925 | putative urea transport protein                              | 29.6  | 25.1  | 30.8  | 52.8  | 52.0  | 46.1  | 1.77 | 5.7E-03 |
| BF1926 | hypothetical protein                                         | 29.3  | 30.2  | 35.0  | 45.0  | 52.7  | 44.4  | 1.50 | 1.6E-02 |
| BF1927 | hypothetical protein                                         | 48.9  | 43.6  | 51.2  | 25.8  | 29.8  | 24.7  | 0.56 | 5.0E-03 |
| BF1928 | putative Rumb/ImpB like DNA repair protein                   | 4.5   | 2.9   | 5.4   | 0.9   | 1.4   | 1.5   | 0.30 | 1.7E-02 |
| BF1929 | putative UmuD/RumA DNA repair protein                        | 1.6   | 0.9   | 1.3   | 0.8   | 0.5   | 0.4   | 0.42 | 6.1E-02 |
| BF1930 | hypothetical protein                                         | 1.1   | 2.5   | 3.0   | 2.3   | 3.2   | 2.5   | 1.33 | 5.1E-01 |
| BF1931 | putative two-component system response regulator             | 18.7  | 19.9  | 20.3  | 33.5  | 37.7  | 32.7  | 1.76 | 1.9E-03 |
| BF1932 | putative transmembrane protein                               | 16.3  | 15.9  | 13.3  | 16.2  | 17.5  | 18.3  | 1.15 | 1.9E-01 |
| BF1933 | putative permease component of ABC transporter               | 1.3   | 2.0   | 1.1   | 1.0   | 0.5   | 0.6   | 0.45 | 6.9E-02 |
| BF1934 | putative ABC transporter ATP-binding component               | 2.4   | 1.8   | 0.3   | 0.2   | 0.3   | 0.9   | 0.37 | 3.6E-01 |
| BF1935 | putative HlyD family secretion protein                       | 0.9   | 0.6   | 0.5   | 0.7   | 0.7   | 1.1   | 1.26 | 4.6E-01 |
| BF1936 | putative outer membrane lipoprotein precursor                | 2.4   | 2.1   | 2.4   | 0.4   | 1.0   | 1.2   | 0.33 | 7.4E-02 |
| cydA   | putative cytochrome d ubiquinol oxidase subunit I            | 519.4 | 531.2 | 515.9 | 488.7 | 528.2 | 571.0 | 1.01 | 8.5E-01 |
| cydB   | putative cytochrome d ubiquinol oxidase subunit II           | 415.3 | 451.0 | 448.0 | 503.3 | 522.9 | 512.7 | 1.17 | 1.4E-02 |
| BF1939 | hypothetical protein                                         | 89.8  | 53.8  | 57.8  | 48.4  | 50.6  | 80.7  | 0.89 | 7.0E-01 |
| BF1940 | hypothetical protein                                         | 41.5  | 41.2  | 32.9  | 36.7  | 32.3  | 51.6  | 1.03 | 9.0E-01 |
| BF1941 | hypothetical protein                                         | 37.7  | 37.9  | 28.3  | 40.8  | 42.4  | 44.3  | 1.24 | 1.4E-01 |
| BF1942 | coproporphyrinogen III oxidase                               | 32.0  | 23.6  | 26.4  | 32.7  | 32.7  | 47.2  | 1.36 | 1.6E-01 |

|        |                                                            |        |        |        |       |        |       |      |         |
|--------|------------------------------------------------------------|--------|--------|--------|-------|--------|-------|------|---------|
| BF1943 | hypothetical protein                                       | 17.6   | 16.7   | 14.5   | 13.5  | 12.5   | 19.8  | 0.92 | 6.8E-01 |
| BF1944 | glycerate dehydrogenase                                    | 298.7  | 326.7  | 306.0  | 228.9 | 232.0  | 241.6 | 0.75 | 3.5E-03 |
| BF1945 | putative AAA family ATPase protein                         | 51.2   | 50.6   | 48.3   | 74.9  | 69.2   | 70.5  | 1.43 | 1.6E-03 |
| BF1946 | putative beta-galactosidase                                | 113.9  | 123.2  | 105.8  | 121.3 | 111.8  | 131.0 | 1.06 | 4.7E-01 |
| BF1947 | hypothetical protein                                       | 229.8  | 246.0  | 233.6  | 167.4 | 163.1  | 162.4 | 0.70 | 6.9E-04 |
| BF1948 | putative UDP-N-acetylglucosamine 2-epimerase               | 161.1  | 147.7  | 148.9  | 215.2 | 193.1  | 213.6 | 1.36 | 7.3E-03 |
| BF1949 | putative transmembrane protein                             | 105.0  | 110.8  | 131.1  | 101.1 | 112.4  | 96.7  | 0.90 | 3.1E-01 |
| BF1950 | hypothetical protein                                       | 229.6  | 233.2  | 225.3  | 87.8  | 95.3   | 96.1  | 0.41 | 1.4E-04 |
| BF1951 | hypothetical protein                                       | 32.3   | 48.1   | 45.8   | 67.3  | 67.3   | 67.4  | 1.63 | 3.5E-02 |
| htpX   | putative transmembrane protease HtpX homolog               | 118.4  | 125.7  | 131.9  | 242.0 | 269.9  | 235.1 | 1.98 | 1.2E-03 |
| BF1953 | putative LemA antigen-like protein                         | 338.1  | 297.8  | 307.2  | 540.8 | 561.5  | 471.9 | 1.67 | 5.1E-03 |
| BF1954 | putative RNA polymerase ECF-type sigma factor              | 1297.1 | 1351.8 | 1383.2 | 934.1 | 1150.3 | 862.8 | 0.73 | 4.1E-02 |
| BF1955 | putative pyruvate carboxylase biotin-containing subunit    | 47.1   | 46.2   | 48.1   | 23.8  | 22.8   | 25.9  | 0.51 | 6.2E-04 |
| BF1956 | putative outer membrane protein                            | 445.3  | 415.6  | 417.7  | 642.7 | 677.9  | 600.7 | 1.50 | 2.7E-03 |
| BF1957 | hypothetical protein                                       | 490.8  | 531.7  | 511.4  | 666.1 | 709.7  | 608.1 | 1.29 | 1.7E-02 |
| mtgA   | monofunctional biosynthetic peptidoglycan transglycosylase | 68.5   | 64.8   | 71.5   | 38.7  | 38.6   | 45.8  | 0.60 | 4.7E-03 |
| BF1959 | putative outer membrane protein OmpA-family                | 1367.2 | 1325.8 | 1270.0 | 913.7 | 825.0  | 843.4 | 0.65 | 1.8E-03 |
| BF1960 | putative MatE-family transmembrane protein                 | 79.4   | 75.3   | 75.0   | 58.4  | 53.2   | 53.8  | 0.72 | 2.9E-03 |
| BF1961 | putative transmembrane transporter                         | 38.2   | 36.5   | 38.6   | 33.1  | 33.6   | 33.3  | 0.88 | 7.1E-03 |
| BF1962 | putative outer membrane protein                            | 13.0   | 11.1   | 11.3   | 10.5  | 10.0   | 11.0  | 0.89 | 1.6E-01 |
| BF1963 | possible anti-sigma factor                                 | 10.8   | 11.9   | 7.8    | 7.7   | 6.0    | 7.8   | 0.71 | 1.3E-01 |
| BF1964 | putative RNA polymerase ECF-type sigma factor              | 9.3    | 7.5    | 8.8    | 7.9   | 11.5   | 5.5   | 0.94 | 8.2E-01 |
| BF1965 | hypothetical protein                                       | 14.4   | 13.2   | 13.8   | 12.2  | 17.3   | 13.9  | 1.04 | 7.9E-01 |
| BF1966 | hypothetical protein                                       | 93.9   | 96.4   | 88.0   | 85.6  | 94.8   | 67.3  | 0.88 | 3.7E-01 |
| BF1967 | putative histone-like DNA-binding protein                  | 12.8   | 8.8    | 7.0    | 6.1   | 9.6    | 6.7   | 0.79 | 4.2E-01 |
| BF1969 | putative ECF-type RNA polymerase sigma factor              | 17.0   | 21.9   | 27.7   | 5.5   | 10.5   | 3.8   | 0.28 | 3.5E-02 |
| BF1970 | possible anti-sigma factor                                 | 18.3   | 17.3   | 15.0   | 8.2   | 10.5   | 10.0  | 0.57 | 1.1E-02 |
| BF1971 | hypothetical protein                                       | 7.1    | 8.3    | 13.5   | 5.5   | 3.7    | 1.9   | 0.36 | 8.7E-02 |
| BF1972 | putative AraC family transcriptional regulator             | 20.6   | 19.6   | 27.2   | 2.0   | 1.6    | 2.1   | 0.08 | 4.9E-04 |
| BF1973 | hypothetical protein                                       | 21.3   | 22.7   | 28.9   | 1.7   | 3.2    | 2.0   | 0.09 | 1.7E-03 |
| BF1974 | hypothetical protein                                       | 25.3   | 29.6   | 36.7   | 1.8   | 2.4    | 1.6   | 0.06 | 6.3E-04 |
| BF1975 | hypothetical protein                                       | 42.0   | 67.9   | 84.3   | 6.1   | 7.1    | 5.4   | 0.10 | 2.3E-03 |
| BF1976 | hypothetical protein                                       | 21.2   | 36.3   | 38.4   | 1.6   | 3.8    | 1.6   | 0.07 | 5.5E-03 |
| BF1977 | hypothetical protein                                       | 12.9   | 25.2   | 28.8   | 1.5   | 2.6    | 1.3   | 0.08 | 5.6E-03 |
| BF1978 | hypothetical protein                                       | 13.7   | 16.8   | 24.2   | 2.7   | 2.6    | 2.3   | 0.14 | 1.8E-03 |
| BF1979 | hypothetical protein                                       | 260.4  | 253.5  | 274.0  | 156.5 | 160.0  | 160.3 | 0.61 | 3.6E-04 |
| BF1980 | hypothetical protein                                       | 0.7    | 0.0    | 2.4    | 0.0   | 0.9    | 0.7   | 0.58 | 5.3E-01 |
| BF1981 | hypothetical protein                                       | 53.7   | 28.0   | 35.7   | 38.0  | 51.1   | 37.5  | 1.10 | 7.2E-01 |
| BF1982 | putative MarR-family regulatory protein                    | 72.5   | 68.8   | 77.7   | 72.9  | 73.2   | 67.3  | 0.98 | 6.7E-01 |
| BF1983 | putative protoporphyrinogen oxidase                        | 315.7  | 319.6  | 294.6  | 256.9 | 268.9  | 257.1 | 0.84 | 1.2E-02 |



|        |                                                         |         |         |         |         |         |         |      |         |
|--------|---------------------------------------------------------|---------|---------|---------|---------|---------|---------|------|---------|
| hemN   | coproporphyrinogen III oxidase                          | 536.0   | 590.7   | 536.9   | 462.3   | 482.5   | 432.6   | 0.83 | 2.9E-02 |
| BF1985 | putative transmembrane transporter protein              | 465.1   | 597.0   | 534.1   | 370.5   | 368.2   | 333.9   | 0.67 | 1.8E-02 |
| BF1986 | putative outer membrane protein                         | 550.8   | 653.7   | 606.2   | 408.7   | 372.9   | 370.0   | 0.64 | 5.4E-03 |
| BF1987 | hypothetical protein                                    | 4.3     | 2.7     | 4.1     | 1.3     | 1.5     | 1.4     | 0.38 | 9.4E-03 |
| BF1988 | putative outer membrane protein                         | 9.4     | 14.5    | 14.7    | 2.8     | 3.9     | 2.1     | 0.23 | 8.7E-03 |
| BF1989 | putative AraC-family transcriptional regulator          | 4.3     | 2.4     | 4.3     | 1.2     | 1.2     | 0.4     | 0.23 | 4.4E-02 |
| BF1990 | hypothetical protein                                    | 77.8    | 72.7    | 65.7    | 61.5    | 55.1    | 78.8    | 0.90 | 4.7E-01 |
| BF1991 | putative TonB-dependent outer membrane receptor protein | 166.9   | 159.7   | 171.5   | 42.7    | 47.1    | 51.1    | 0.28 | 3.0E-04 |
| BF1992 | putative outer membrane protein                         | 193.7   | 208.1   | 225.5   | 25.2    | 26.8    | 31.0    | 0.13 | 1.8E-04 |
| BF1993 | hypothetical protein                                    | 196.5   | 204.1   | 237.9   | 21.4    | 22.3    | 24.1    | 0.11 | 1.0E-04 |
| BF1994 | hypothetical protein                                    | 181.2   | 167.7   | 191.4   | 17.8    | 19.7    | 25.1    | 0.11 | 4.0E-04 |
| BF1995 | hypothetical protein                                    | 181.1   | 146.4   | 180.2   | 12.2    | 15.0    | 17.9    | 0.09 | 4.9E-04 |
| BF1996 | hypothetical protein                                    | 181.1   | 142.5   | 170.3   | 13.1    | 13.7    | 14.3    | 0.08 | 1.1E-04 |
| BF1997 | hypothetical protein                                    | 163.7   | 124.3   | 139.5   | 12.1    | 12.2    | 15.8    | 0.09 | 4.0E-04 |
| BF1998 | hypothetical protein                                    | 143.0   | 96.9    | 119.3   | 8.3     | 10.4    | 12.4    | 0.09 | 8.0E-04 |
| BF1999 | hypothetical protein                                    | 125.7   | 103.9   | 112.0   | 10.5    | 10.6    | 13.1    | 0.10 | 2.0E-04 |
| BF2000 | putative polysialic acid capsule transport protein      | 116.5   | 88.2    | 97.2    | 10.6    | 9.4     | 11.3    | 0.10 | 2.8E-04 |
| BF2001 | hypothetical protein                                    | 160.7   | 132.2   | 158.5   | 160.0   | 170.5   | 172.5   | 1.12 | 2.3E-01 |
| BF2002 | hypothetical protein                                    | 156.5   | 156.2   | 152.7   | 186.1   | 191.4   | 183.2   | 1.20 | 1.4E-03 |
| BF2003 | hypothetical protein                                    | 178.8   | 159.8   | 156.9   | 210.4   | 200.6   | 201.8   | 1.24 | 1.8E-02 |
| BF2004 | hypothetical protein                                    | 154.7   | 136.1   | 137.6   | 162.8   | 168.7   | 158.1   | 1.14 | 6.9E-02 |
| BF2005 | hypothetical protein                                    | 142.1   | 119.9   | 124.5   | 169.9   | 174.3   | 187.4   | 1.38 | 1.4E-02 |
| BF2006 | hypothetical protein                                    | 151.6   | 119.2   | 116.5   | 178.2   | 169.3   | 242.7   | 1.51 | 7.0E-02 |
| BF2007 | hypothetical protein                                    | 300.1   | 257.8   | 262.3   | 369.3   | 351.0   | 388.0   | 1.35 | 1.4E-02 |
| BF2008 | putative transmembrane protein                          | 202.2   | 234.1   | 212.2   | 309.3   | 296.4   | 267.6   | 1.35 | 1.9E-02 |
| BF2009 | putative transmembrane protein                          | 353.3   | 385.8   | 418.1   | 423.5   | 444.8   | 326.3   | 1.03 | 8.6E-01 |
| BF2010 | putative transmembrane protein                          | 415.4   | 405.3   | 483.3   | 463.5   | 472.5   | 384.9   | 1.01 | 9.2E-01 |
| BF2011 | putative transmembrane protein                          | 355.6   | 331.3   | 360.7   | 466.8   | 519.3   | 407.9   | 1.33 | 3.8E-02 |
| BF2012 | hypothetical protein                                    | 290.1   | 264.6   | 273.6   | 478.0   | 474.5   | 418.3   | 1.65 | 2.7E-03 |
| BF2013 | hypothetical protein                                    | 340.6   | 297.3   | 281.2   | 504.4   | 455.2   | 530.1   | 1.62 | 7.8E-03 |
| BF2014 | hypothetical protein                                    | 259.2   | 245.3   | 247.6   | 410.8   | 382.7   | 388.8   | 1.57 | 6.4E-04 |
| BF2015 | putative bacteriophage Gp25 protein                     | 217.3   | 245.6   | 211.9   | 398.9   | 373.8   | 388.8   | 1.72 | 1.9E-03 |
| BF2016 | hypothetical protein                                    | 182.2   | 165.6   | 153.2   | 345.0   | 289.3   | 347.0   | 1.96 | 3.9E-03 |
| BF2017 | hypothetical protein                                    | 295.8   | 234.6   | 255.8   | 496.5   | 442.1   | 506.2   | 1.84 | 5.4E-03 |
| BF2018 | hypothetical protein                                    | 307.5   | 274.2   | 298.1   | 532.9   | 536.3   | 536.5   | 1.83 | 5.7E-04 |
| BF2019 | hypothetical protein                                    | 206.8   | 183.7   | 213.6   | 333.4   | 351.1   | 293.7   | 1.62 | 7.3E-03 |
| BF2020 | hypothetical protein                                    | 371.2   | 322.1   | 376.3   | 468.7   | 491.5   | 377.4   | 1.25 | 1.3E-01 |
| BF2021 | hypothetical protein                                    | 371.5   | 371.7   | 378.1   | 488.2   | 558.3   | 436.5   | 1.32 | 3.6E-02 |
| BF2022 | hypothetical protein                                    | 419.1   | 350.4   | 393.6   | 502.1   | 534.8   | 415.5   | 1.25 | 1.2E-01 |
| BF2023 | putative ATP-dependent protease                         | 609.1   | 588.8   | 507.0   | 728.7   | 658.9   | 787.5   | 1.28 | 5.8E-02 |
| BF2024 | hypothetical protein                                    | 1237.0  | 1186.2  | 1114.7  | 2929.9  | 3003.1  | 2718.4  | 2.45 | 3.6E-04 |
| BF2025 | hypothetical protein                                    | 1607.7  | 1358.9  | 1478.9  | 3296.0  | 3457.5  | 2776.9  | 2.14 | 3.2E-03 |
| BF2026 | hypothetical protein                                    | 36030.3 | 31908.4 | 39148.8 | 44437.4 | 47571.6 | 41029.2 | 1.24 | 6.9E-02 |
| BF2027 | hypothetical protein                                    | 192.4   | 165.1   | 189.6   | 203.6   | 233.0   | 160.8   | 1.08 | 6.1E-01 |
| BF2028 | putative aminotransferase                               | 249.4   | 228.7   | 277.6   | 314.9   | 316.4   | 287.5   | 1.22 | 6.3E-02 |
| BF2029 | putative ATP-binding protein                            | 32.5    | 26.3    | 30.1    | 46.5    | 52.7    | 48.7    | 1.67 | 6.5E-03 |
| BF2030 | putative tautomerase                                    | 19.9    | 22.2    | 21.9    | 39.6    | 49.4    | 30.0    | 1.82 | 3.1E-02 |

|        |                                                                               |       |       |       |       |       |       |      |         |
|--------|-------------------------------------------------------------------------------|-------|-------|-------|-------|-------|-------|------|---------|
| BF2031 | hypothetical protein                                                          | 0.0   | 0.0   | 0.6   | 0.6   | 0.0   | 0.0   | 0.86 |         |
| BF2032 | putative TetR-family transcriptional regulator                                | 147.6 | 124.0 | 137.8 | 119.6 | 111.5 | 104.4 | 0.82 | 6.3E-02 |
| BF2035 | hypothetical protein                                                          | 2.3   | 4.9   | 6.6   | 1.3   | 1.1   | 1.8   | 0.32 | 5.4E-02 |
| BF2036 | hypothetical protein                                                          | 3.3   | 4.2   | 3.4   | 2.0   | 1.4   | 1.2   | 0.41 | 1.4E-02 |
| BF2037 | putative transmembrane protein                                                | 13.0  | 15.4  | 13.1  | 1.4   | 5.2   | 3.2   | 0.21 | 3.0E-02 |
| BF2038 | putative transmembrane protein                                                | 7.5   | 8.0   | 7.9   | 5.0   | 4.4   | 1.4   | 0.40 | 1.3E-01 |
| BF2039 | putative transmembrane protein                                                | 10.2  | 9.1   | 9.9   | 3.5   | 5.2   | 2.4   | 0.36 | 2.5E-02 |
| BF2040 | putative transmembrane protein                                                | 12.0  | 13.2  | 15.0  | 24.3  | 19.9  | 18.4  | 1.55 | 2.8E-02 |
| BF2041 | hypothetical protein                                                          | 8.7   | 8.8   | 8.9   | 11.2  | 15.5  | 15.4  | 1.58 | 2.7E-02 |
| BFt22  | tRNA-Lys-TTT                                                                  | 14.5  | 28.3  | 27.9  | 22.9  | 26.6  | 40.6  | 1.29 | 4.8E-01 |
| BF2043 | putative ATP-binding component of ABC transporter                             | 220.6 | 210.4 | 212.1 | 231.3 | 222.7 | 263.2 | 1.11 | 1.6E-01 |
| BF2044 | putative TonB-dependent outer membrane receptor protein                       | 238.6 | 272.1 | 264.2 | 355.8 | 360.0 | 310.5 | 1.32 | 2.3E-02 |
| BF2045 | hypothetical protein                                                          | 298.8 | 316.9 | 306.2 | 350.9 | 355.6 | 309.9 | 1.10 | 1.6E-01 |
| BF2046 | putative transmembrane endonuclease/exonuclease/phosphatase family protein    | 12.3  | 11.1  | 11.5  | 8.8   | 5.6   | 8.4   | 0.64 | 6.5E-02 |
| BF2047 | putative two-component system sensor kinase/response regulator fusion protein | 25.4  | 21.0  | 18.6  | 12.5  | 8.4   | 16.2  | 0.55 | 8.1E-02 |
| BF2048 | putative transmembrane glycosyltransferase                                    | 6.4   | 5.4   | 5.3   | 7.5   | 4.6   | 9.0   | 1.18 | 5.4E-01 |
| BF2049 | hypothetical protein                                                          | 11.6  | 9.3   | 10.6  | 8.0   | 6.9   | 8.3   | 0.74 | 4.3E-02 |
| BF2050 | putative transmembrane acyltransferase                                        | 7.3   | 4.2   | 7.0   | 4.7   | 5.8   | 3.9   | 0.80 | 4.1E-01 |
| BF2051 | putative glycosyltransferase                                                  | 12.8  | 17.6  | 16.2  | 12.4  | 15.3  | 14.3  | 0.90 | 5.0E-01 |
| BF2052 | putative glycosyltransferase protein                                          | 13.3  | 15.3  | 16.7  | 12.8  | 13.3  | 10.7  | 0.81 | 1.3E-01 |
| BF2053 | putative glycosyltransferase                                                  | 9.4   | 13.6  | 10.7  | 10.0  | 9.3   | 7.0   | 0.78 | 2.4E-01 |
| BF2054 | hypothetical protein                                                          | 37.7  | 33.4  | 44.8  | 33.2  | 38.2  | 25.7  | 0.83 | 3.4E-01 |
| BF2055 | putative transmembrane O-antigen flippase                                     | 12.5  | 13.2  | 15.0  | 7.1   | 8.6   | 6.6   | 0.55 | 8.6E-03 |
| BF2056 | putative capsular polysaccharide glycosyltransferase                          | 31.1  | 28.5  | 33.6  | 24.5  | 24.4  | 19.0  | 0.73 | 5.3E-02 |
| BF2058 | putative capsule-related protein                                              | 0.6   | 0.8   | 0.8   | 0.0   | 0.2   | 0.1   | 0.22 | 5.4E-03 |
| BF2059 | putative capsule-related glycosyltransferase                                  | 4.8   | 5.3   | 2.0   | 0.8   | 1.1   | 1.5   | 0.30 | 5.6E-02 |
| BF2060 | putative transmembrane surface-related protein                                | 3.6   | 3.1   | 3.5   | 0.8   | 0.8   | 0.5   | 0.20 | 1.7E-03 |
| BF2061 | putative transmembrane protein                                                | 6.7   | 6.3   | 6.3   | 1.7   | 1.8   | 1.7   | 0.27 | 9.6E-05 |
| BF2062 | putative outer membrane protein                                               | 14.4  | 13.0  | 14.5  | 7.1   | 6.5   | 6.3   | 0.48 | 8.7E-04 |
| BF2063 | hypothetical protein                                                          | 48.0  | 40.4  | 37.7  | 23.5  | 21.7  | 30.0  | 0.59 | 2.7E-02 |
| BF2064 | putative aminopeptidase                                                       | 147.2 | 144.9 | 119.0 | 274.5 | 206.8 | 296.3 | 1.88 | 1.9E-02 |
| nqrA   | Na(+)-translocating NADH-quinone reductase subunit A                          | 408.1 | 414.4 | 358.2 | 476.5 | 416.9 | 547.0 | 1.22 | 1.5E-01 |
| nqrB   | Na(+)-translocating NADH-quinone reductase subunit B                          | 706.7 | 757.8 | 687.9 | 664.6 | 627.8 | 701.7 | 0.93 | 2.1E-01 |
| nqrC   | Na(+)-translocating NADH-quinone reductase subunit C                          | 453.6 | 442.4 | 401.8 | 413.2 | 405.3 | 422.7 | 0.96 | 4.0E-01 |
| nqrD   | NADH-ubiquinone oxidoreductase                                                | 553.3 | 559.5 | 526.1 | 458.4 | 479.9 | 487.5 | 0.87 | 1.5E-02 |

|        |                                                                              |        |        |        |       |       |       |      |         |
|--------|------------------------------------------------------------------------------|--------|--------|--------|-------|-------|-------|------|---------|
| nqrE   | Na <sup>+</sup> -translocating NADH-quinone reductase subunit E              | 533.9  | 613.4  | 559.7  | 498.0 | 510.2 | 510.5 | 0.89 | 8.2E-02 |
| nqrF   | Na <sup>(+)</sup> -translocating NADH-quinone reductase subunit F            | 860.9  | 915.0  | 749.7  | 758.9 | 698.1 | 853.6 | 0.91 | 4.2E-01 |
| dbpA   | putative ATP-independent RNA helicase                                        | 120.4  | 112.9  | 104.7  | 129.3 | 118.6 | 163.2 | 1.21 | 2.0E-01 |
| serC   | phosphoserine aminotransferase                                               | 956.8  | 931.6  | 828.0  | 664.7 | 646.9 | 678.7 | 0.73 | 8.0E-03 |
| serA   | putative D-3-phosphoglycerate dehydrogenase                                  | 1180.4 | 1094.1 | 1017.9 | 760.8 | 712.7 | 742.5 | 0.67 | 4.2E-03 |
| BF2074 | hypothetical protein                                                         | 1859.5 | 1878.2 | 1641.8 | 962.0 | 864.0 | 969.8 | 0.52 | 1.8E-03 |
| BF2075 | putative peptidyl-prolyl cis-trans isomerase                                 | 224.4  | 202.1  | 202.8  | 109.3 | 112.4 | 115.1 | 0.54 | 6.3E-04 |
| BF2076 | hypothetical protein                                                         | 160.2  | 134.2  | 118.2  | 65.2  | 70.1  | 86.8  | 0.54 | 1.7E-02 |
| BF2077 | putative type II restriction enzyme                                          | 147.9  | 110.5  | 103.5  | 58.2  | 51.2  | 106.9 | 0.57 | 1.4E-01 |
| BF2078 | hypothetical protein                                                         | 165.6  | 121.2  | 142.8  | 70.1  | 91.0  | 107.5 | 0.62 | 6.2E-02 |
| BF2079 | glycine dehydrogenase                                                        | 76.4   | 73.9   | 73.6   | 207.7 | 197.0 | 204.2 | 2.72 | 2.3E-05 |
| BF2080 | putative metallo-beta-lactamase                                              | 72.4   | 61.6   | 64.8   | 123.2 | 123.2 | 112.9 | 1.81 | 2.2E-03 |
| gidB   | glucose-inhibited division protein B                                         | 78.4   | 95.8   | 72.3   | 133.0 | 126.3 | 121.3 | 1.55 | 1.7E-02 |
| BF2082 | hypothetical protein                                                         | 149.6  | 140.1  | 130.4  | 155.5 | 157.5 | 117.4 | 1.02 | 9.1E-01 |
| BF2083 | hypothetical protein                                                         | 111.8  | 118.5  | 101.6  | 63.3  | 59.3  | 88.5  | 0.63 | 4.4E-02 |
| BF2084 | putative TonB-dependent outer membrane receptor protein                      | 4.2    | 3.1    | 3.4    | 5.8   | 3.7   | 6.0   | 1.41 | 1.8E-01 |
| BF2085 | possible exported heavy-metal binding protein                                | 3.4    | 4.2    | 4.4    | 10.2  | 9.8   | 13.0  | 2.75 | 4.0E-03 |
| BF2086 | putative transmembrane cation-transporting ATPase                            | 460.2  | 503.0  | 410.3  | 185.8 | 169.0 | 269.9 | 0.45 | 1.6E-02 |
| BF2087 | putative AraC-type transcriptional regulator                                 | 132.3  | 149.5  | 140.9  | 160.1 | 153.5 | 141.5 | 1.08 | 2.8E-01 |
| BF2088 | putative lipoate-protein ligase                                              | 53.5   | 58.6   | 45.2   | 70.3  | 53.4  | 107.5 | 1.42 | 2.4E-01 |
| BF2089 | hypothetical protein                                                         | 41.7   | 42.4   | 41.8   | 41.4  | 48.3  | 40.7  | 1.03 | 6.6E-01 |
| BF2092 | putative transmembrane oligopeptide transporter                              | 61.7   | 66.9   | 54.5   | 118.2 | 99.4  | 126.1 | 1.87 | 7.5E-03 |
| BF2093 | hypothetical protein                                                         | 1183.0 | 1156.9 | 1076.5 | 599.7 | 584.0 | 554.4 | 0.51 | 4.9E-04 |
| BF2094 | putative two-component sensor histidine kinase protein                       | 2.1    | 1.4    | 1.3    | 11.7  | 11.0  | 13.7  | 7.58 | 1.4E-03 |
| BF2095 | putative two-component response regulator transcriptional regulatory protein | 16.8   | 16.6   | 10.7   | 31.6  | 22.1  | 35.0  | 2.01 | 4.8E-02 |
| BF2096 | putative transmembrane protein                                               | 3.4    | 2.6    | 3.0    | 19.3  | 15.9  | 23.9  | 6.52 | 1.1E-03 |
| BF2097 | hypothetical protein                                                         | 0.9    | 2.2    | 0.7    | 6.0   | 8.5   | 10.6  | 7.28 | 1.6E-02 |
| BF2098 | putative transporter permease protein                                        | 0.6    | 0.7    | 1.0    | 4.6   | 5.1   | 6.5   | 7.26 | 2.0E-03 |
| BF2099 | putative ATP-binding ABC transporter protein                                 | 11.8   | 11.1   | 17.3   | 27.7  | 30.6  | 35.4  | 2.37 | 1.3E-02 |
| BF2100 | hypothetical protein                                                         | 204.4  | 223.7  | 206.9  | 259.5 | 218.9 | 262.7 | 1.16 | 1.2E-01 |
| BF2101 | putative GTP-binding cell division protein                                   | 104.8  | 84.9   | 99.1   | 118.1 | 105.2 | 111.2 | 1.16 | 1.5E-01 |
| BF2102 | putative transmembrane sodium-solute transporter                             | 59.2   | 60.7   | 60.7   | 49.5  | 44.7  | 46.6  | 0.78 | 4.7E-03 |
| BF2104 | putative transmembrane protein                                               | 253.7  | 296.8  | 328.4  | 225.3 | 259.7 | 223.7 | 0.81 | 1.2E-01 |
| BF2105 | hypothetical protein                                                         | 1298.3 | 1266.8 | 1370.0 | 597.3 | 646.7 | 507.0 | 0.44 | 2.1E-03 |

|        |                                                                 |        |        |        |        |        |        |      |         |
|--------|-----------------------------------------------------------------|--------|--------|--------|--------|--------|--------|------|---------|
| recR   | putative RecR-family recombination protein                      | 56.8   | 40.1   | 41.8   | 33.8   | 33.4   | 49.6   | 0.84 | 4.3E-01 |
| BF2107 | putative transmembrane protein                                  | 48.6   | 35.5   | 53.5   | 56.5   | 64.0   | 59.1   | 1.32 | 1.4E-01 |
| BF2108 | putative acetyltransferase                                      | 96.4   | 92.1   | 109.0  | 92.6   | 113.5  | 93.7   | 1.01 | 9.6E-01 |
| BF2109 | putative transcriptional regulator                              | 323.9  | 354.1  | 337.6  | 301.6  | 352.9  | 217.7  | 0.84 | 3.7E-01 |
| BF2110 | putative amino acid transferase                                 | 134.0  | 112.3  | 130.4  | 144.3  | 152.5  | 123.4  | 1.11 | 3.4E-01 |
| BFt23  | tRNA-Asp-GTC                                                    | 0.0    | 16.6   | 20.7   | 19.7   | 9.1    | 40.7   | 1.05 | 9.4E-01 |
| BF2111 | putative bacteriophage integrase                                | 112.1  | 104.0  | 128.8  | 24.1   | 16.8   | 28.7   | 0.20 | 2.9E-03 |
| BF2112 | putative RNA-directed DNA polymerase from retron                | 50.5   | 51.5   | 53.1   | 32.9   | 34.2   | 31.1   | 0.63 | 8.6E-04 |
| BF2113 | hypothetical protein                                            | 2915.8 | 3471.6 | 4169.2 | 2202.5 | 3412.1 | 3114.8 | 0.82 | 3.8E-01 |
| BF2114 | possible DNA-binding protein                                    | 2.4    | 1.3    | 2.6    | 0.0    | 0.7    | 0.0    | 0.35 |         |
| BF2115 | hypothetical protein                                            | 1.2    | 1.2    | 1.3    | 0.0    | 0.0    | 0.0    |      |         |
| BF2116 | hypothetical protein                                            | 1.2    | 0.6    | 1.3    | 0.0    | 0.0    | 0.0    |      |         |
| BF2117 | hypothetical protein                                            | 0.0    | 0.0    | 0.0    | 0.0    | 0.0    | 0.0    |      |         |
| BF2118 | hypothetical protein                                            | 0.0    | 0.0    | 1.3    | 0.4    | 1.8    | 0.8    | 0.62 |         |
| BF2119 | hypothetical protein                                            | 2.2    | 2.3    | 1.8    | 0.5    | 1.3    | 1.0    | 0.42 | 6.5E-02 |
| BF2120 | hypothetical protein                                            | 0.0    | 1.1    | 1.2    | 0.0    | 0.6    | 0.5    | 0.49 | 3.4E-02 |
| BF2121 | hypothetical protein                                            | 0.7    | 3.9    | 0.0    | 0.0    | 3.4    | 0.7    | 0.91 | 9.6E-01 |
| BF2122 | putative aldo/keto reductase                                    | 7.0    | 6.9    | 7.8    | 11.2   | 11.8   | 10.3   | 1.53 | 4.8E-03 |
| BF2123 | putative AraC family transcriptional regulator                  | 8.4    | 11.5   | 9.2    | 25.6   | 26.7   | 22.3   | 2.57 | 3.9E-03 |
| BF2124 | hypothetical protein                                            | 39.3   | 37.2   | 42.6   | 51.4   | 57.2   | 30.7   | 1.13 | 6.3E-01 |
| BF2125 | putative aldo/keto reductase                                    | 2.0    | 2.1    | 1.8    | 2.0    | 1.7    | 4.3    | 1.26 | 5.5E-01 |
| BF2126 | putative flavodoxin                                             | 1.9    | 2.2    | 1.4    | 1.8    | 1.5    | 0.9    | 0.74 | 3.5E-01 |
| BF2127 | putative aldo/keto reductase                                    | 2.3    | 2.4    | 2.3    | 1.6    | 2.6    | 2.8    | 0.97 | 9.1E-01 |
| BF2128 | hypothetical protein                                            | 0.9    | 0.0    | 2.1    | 0.9    | 1.1    | 0.9    | 0.69 | 4.9E-01 |
| BF2131 | hypothetical protein                                            | 4.9    | 1.9    | 2.0    | 1.7    | 3.1    | 2.0    | 0.81 | 6.5E-01 |
| BF2132 | putative cation efflux protein                                  | 4.2    | 4.7    | 3.1    | 2.6    | 2.3    | 3.9    | 0.72 | 2.4E-01 |
| BF2133 | putative aminotransferase                                       | 2.0    | 1.3    | 1.7    | 1.4    | 1.4    | 1.6    | 0.91 | 5.9E-01 |
| BF2134 | putative aldo/keto reductase                                    | 3.0    | 1.2    | 3.1    | 1.6    | 1.7    | 3.6    | 0.97 | 9.5E-01 |
| BF2135 | putative amidohydrolase                                         | 2.4    | 2.6    | 1.7    | 2.1    | 1.4    | 1.8    | 0.80 | 3.4E-01 |
| BF2136 | short chain dehydrogenase                                       | 2.9    | 3.1    | 2.3    | 2.5    | 2.2    | 1.6    | 0.75 | 2.2E-01 |
| BF2137 | putative AraC family transcriptional regulatory protein         | 3.5    | 4.4    | 3.8    | 2.9    | 1.5    | 3.3    | 0.63 | 1.9E-01 |
| BF2138 | possible carboxymuconolactone decarboxylase                     | 3.8    | 4.7    | 2.8    | 6.6    | 4.7    | 7.7    | 1.68 | 1.1E-01 |
| BF2139 | flavodoxin                                                      | 5.5    | 8.8    | 6.1    | 5.0    | 5.3    | 7.4    | 0.87 | 5.6E-01 |
| BF2140 | hypothetical protein                                            | 8.6    | 0.7    | 4.4    | 8.8    | 10.7   | 8.9    | 3.16 | 2.6E-01 |
| BF2141 | putative acetyltransferase                                      | 7.0    | 7.4    | 9.8    | 5.3    | 8.6    | 8.1    | 0.90 | 6.6E-01 |
| BF2142 | putative outer membrane protein                                 | 12.3   | 11.8   | 10.2   | 9.6    | 9.6    | 7.6    | 0.78 | 9.2E-02 |
| BF2143 | hypothetical protein                                            | 0.0    | 0.9    | 0.5    | 0.8    | 0.5    | 0.0    | 0.97 | 9.6E-01 |
| BF2144 | putative 2,5-dichloro-2,5-cyclohexadiene-1,4-diol dehydrogenase | 1.4    | 0.7    | 0.5    | 1.1    | 0.5    | 1.1    | 1.08 | 8.9E-01 |
| BF2145 | putative aldo/keto reductase                                    | 0.3    | 1.1    | 0.3    | 0.4    | 0.5    | 0.6    | 1.05 | 9.4E-01 |
| BF2146 | putative RibD-family protein                                    | 0.5    | 0.0    | 0.9    | 0.0    | 0.0    | 0.0    |      |         |
| BF2147 | hypothetical protein                                            | 2.5    | 3.0    | 2.9    | 2.0    | 2.7    | 2.8    | 0.90 | 4.8E-01 |
| BF2148 | putative transmembrane protein                                  | 2.1    | 3.2    | 3.6    | 1.8    | 2.1    | 1.8    | 0.65 | 1.0E-01 |
| BF2149 | putative aldo/keto reductase                                    | 2.6    | 2.2    | 2.9    | 3.3    | 2.4    | 3.8    | 1.22 | 3.3E-01 |
| BF2150 | putative IS element                                             | 12.0   | 12.8   | 14.1   | 19.4   | 13.0   | 17.4   | 1.27 | 1.9E-01 |

|        |                                                           |        |        |        |        |        |        |      |         |
|--------|-----------------------------------------------------------|--------|--------|--------|--------|--------|--------|------|---------|
| BF2151 | hypothetical membrane protein                             | 20.0   | 23.2   | 25.6   | 14.8   | 13.0   | 17.1   | 0.65 | 3.2E-02 |
| BF2152 | hypothetical protein                                      | 4.1    | 0.0    | 2.2    | 1.0    | 0.0    | 0.0    | 0.32 |         |
| BF2153 | putative lipoprotein                                      | 2.6    | 2.3    | 2.4    | 0.4    | 0.2    | 0.3    | 0.11 | 4.2E-03 |
| BF2154 | putative cation transport related membrane protein        | 0.8    | 1.0    | 1.0    | 0.2    | 0.6    | 0.7    | 0.48 | 1.8E-01 |
| BF2155 | hypothetical protein                                      | 3.9    | 4.0    | 4.6    | 1.1    | 1.0    | 1.7    | 0.31 | 6.4E-03 |
| BF2156 | hypothetical protein                                      | 7.4    | 6.3    | 11.5   | 3.5    | 4.3    | 2.1    | 0.39 | 4.8E-02 |
| BF2157 | putative lipoprotein                                      | 71.2   | 63.3   | 70.0   | 41.5   | 50.9   | 40.9   | 0.65 | 1.4E-02 |
| BF2158 | hypothetical protein                                      | 64.3   | 61.3   | 56.8   | 45.1   | 63.4   | 43.3   | 0.82 | 2.5E-01 |
| BF2159 | hypothetical protein                                      | 8.2    | 5.0    | 10.4   | 11.1   | 15.0   | 6.8    | 1.38 | 4.3E-01 |
| BF2160 | hypothetical protein                                      | 24.1   | 18.1   | 24.3   | 23.0   | 21.6   | 21.6   | 1.01 | 9.7E-01 |
| BF2161 | hypothetical protein                                      | 756.3  | 749.4  | 838.7  | 905.2  | 962.9  | 769.7  | 1.12 | 2.7E-01 |
| BF2162 | hypothetical protein                                      | 4126.7 | 3799.2 | 4439.6 | 2885.2 | 2938.3 | 2754.8 | 0.69 | 5.8E-03 |
| BF2163 | putative lipoprotein                                      | 690.3  | 624.2  | 666.9  | 502.5  | 551.7  | 468.9  | 0.77 | 2.0E-02 |
| BF2164 | putative TonB-related exported protein                    | 504.4  | 444.0  | 473.6  | 320.1  | 358.8  | 324.9  | 0.71 | 7.5E-03 |
| BF2165 | conserved hypothetical lipoprotein                        | 354.6  | 305.7  | 304.1  | 224.6  | 212.8  | 259.5  | 0.72 | 2.9E-02 |
| BF2166 | hypothetical protein                                      | 366.9  | 299.8  | 323.0  | 194.5  | 234.9  | 257.9  | 0.69 | 4.2E-02 |
| BF2167 | putative exported membrane protein                        | 395.1  | 314.8  | 370.3  | 192.8  | 220.7  | 244.8  | 0.61 | 1.7E-02 |
| BF2168 | hypothetical protein                                      | 40.7   | 31.0   | 35.7   | 8.9    | 7.0    | 10.0   | 0.24 | 2.0E-03 |
| BF2169 | putative TetR-family transcriptional regulator            | 327.5  | 333.7  | 330.8  | 248.9  | 257.0  | 269.1  | 0.78 | 2.2E-03 |
| BF2170 | putative polyketide synthesis O-methyltransferase         | 8.2    | 12.1   | 10.7   | 7.4    | 8.5    | 10.3   | 0.85 | 4.1E-01 |
| BF2171 | putative transport-related membrane protein               | 8.9    | 8.0    | 9.4    | 5.4    | 6.0    | 6.8    | 0.69 | 2.6E-02 |
| BF2172 | putative transport-related membrane protein               | 11.0   | 9.8    | 8.6    | 6.4    | 8.5    | 8.8    | 0.80 | 2.0E-01 |
| BF2173 | putative two-component regulatory system histidine kinase | 3.0    | 4.8    | 3.0    | 2.9    | 2.5    | 2.1    | 0.71 | 1.9E-01 |
| BF2174 | putative AraC-family transcriptional regulator            | 36.8   | 39.6   | 42.1   | 30.3   | 34.6   | 28.7   | 0.79 | 4.7E-02 |
| BF2175 | hypothetical protein                                      | 18.1   | 22.7   | 20.9   | 15.7   | 16.8   | 17.0   | 0.80 | 6.3E-02 |
| BF2176 | putative AsnC-family transcriptional regulator            | 66.7   | 56.5   | 69.3   | 75.4   | 79.9   | 75.2   | 1.20 | 8.1E-02 |
| BF2177 | hypothetical protein                                      | 65.4   | 65.5   | 78.0   | 69.2   | 83.2   | 82.0   | 1.12 | 3.0E-01 |
| BF2178 | putative AraC-family transcriptional regulator            | 137.2  | 137.3  | 154.7  | 123.9  | 121.8  | 122.4  | 0.86 | 3.8E-02 |
| BF2179 | hypothetical protein                                      | 238.4  | 224.2  | 249.3  | 328.1  | 367.8  | 302.6  | 1.40 | 1.6E-02 |
| BF2180 | hypothetical protein                                      | 101.7  | 100.4  | 101.1  | 143.8  | 154.2  | 134.8  | 1.43 | 3.4E-03 |
| BF2181 | hypothetical protein                                      | 122.2  | 156.8  | 144.8  | 190.5  | 194.2  | 186.3  | 1.35 | 3.1E-02 |
| BF2182 | hypothetical protein                                      | 3.7    | 1.7    | 2.7    | 0.9    | 1.4    | 0.6    | 0.36 | 7.0E-02 |
| BF2183 | hypothetical protein                                      | 0.4    | 0.9    | 0.8    | 0.5    | 0.4    | 0.7    | 0.80 | 6.0E-01 |
| BF2184 | putative lipoprotein                                      | 1.9    | 2.6    | 1.6    | 1.5    | 1.4    | 1.7    | 0.77 | 2.2E-01 |
| BF2185 | hypothetical protein                                      | 4.3    | 5.0    | 7.3    | 1.7    | 4.0    | 2.1    | 0.45 | 8.8E-02 |
| BF2186 | hypothetical protein                                      | 5.0    | 6.1    | 5.3    | 2.1    | 1.1    | 1.4    | 0.27 | 8.9E-03 |
| BF2187 | hypothetical protein                                      | 243.2  | 236.2  | 234.8  | 57.3   | 63.4   | 56.2   | 0.25 | 7.7E-05 |
| BF2188 | hypothetical protein                                      | 0.0    | 0.0    | 0.0    | 0.5    | 0.0    | 0.0    |      |         |
| BF2189 | putative NAD dependent epimerase/dehydratase              | 68.8   | 62.4   | 66.0   | 51.6   | 65.1   | 55.2   | 0.87 | 1.8E-01 |

|        |                                                                                  |         |         |         |        |        |        |      |         |
|--------|----------------------------------------------------------------------------------|---------|---------|---------|--------|--------|--------|------|---------|
| BF2190 | putative two component system histidine kinase/response regulator fusion protein | 69.1    | 65.9    | 75.4    | 60.8   | 65.6   | 47.9   | 0.82 | 1.8E-01 |
| BF2191 | hypothetical protein                                                             | 44.6    | 45.7    | 44.6    | 69.1   | 66.0   | 54.3   | 1.40 | 2.4E-02 |
| BF2192 | putative helicase                                                                | 118.5   | 119.1   | 135.5   | 234.6  | 240.0  | 204.0  | 1.82 | 3.6E-03 |
| BF2193 | putative hydrolase exported protein                                              | 67.5    | 69.9    | 69.8    | 222.7  | 220.9  | 181.5  | 3.00 | 6.8E-04 |
| BF2194 | hypothetical protein                                                             | 253.7   | 265.8   | 289.1   | 118.7  | 127.2  | 106.1  | 0.43 | 1.3E-03 |
| BF2195 | hypothetical protein                                                             | 287.5   | 301.2   | 317.1   | 75.0   | 89.5   | 75.8   | 0.26 | 3.6E-04 |
| BF2196 | putative lipoprotein                                                             | 470.8   | 466.4   | 474.8   | 107.0  | 110.6  | 100.9  | 0.23 | 1.9E-05 |
| BF2197 | hypothetical protein                                                             | 7.0     | 7.3     | 8.2     | 13.7   | 11.3   | 12.8   | 1.68 | 6.2E-03 |
| BF2198 | hypothetical protein                                                             | 12.2    | 15.4    | 13.6    | 19.2   | 22.3   | 17.5   | 1.43 | 3.9E-02 |
| BF2199 | hypothetical protein                                                             | 72.6    | 71.7    | 79.9    | 52.3   | 57.9   | 54.7   | 0.74 | 7.6E-03 |
| BF2200 | hypothetical protein                                                             | 45.0    | 44.5    | 37.4    | 42.7   | 51.1   | 48.5   | 1.12 | 2.9E-01 |
| BF2201 | putative ligase                                                                  | 61.7    | 59.7    | 62.6    | 65.8   | 54.2   | 57.8   | 0.96 | 6.3E-01 |
| BF2202 | cell volume regulation protein CvrA                                              | 157.4   | 163.1   | 170.8   | 159.4  | 172.9  | 130.9  | 0.94 | 5.6E-01 |
| BF2203 | putative uracil permease                                                         | 87.8    | 80.1    | 90.3    | 82.9   | 91.8   | 78.4   | 0.98 | 7.9E-01 |
| hcp    | hydroxylamine reductase                                                          | 29.8    | 37.1    | 34.5    | 19.2   | 23.5   | 24.4   | 0.66 | 2.8E-02 |
| BF2205 | putative regulatory protein                                                      | 149.4   | 150.8   | 141.8   | 70.1   | 72.4   | 61.3   | 0.46 | 9.6E-04 |
| BF2206 | putative two-component system, sensor kinase                                     | 34.5    | 33.9    | 35.8    | 39.6   | 39.3   | 31.0   | 1.05 | 6.5E-01 |
| BF2207 | putative two-component system, response regulator                                | 83.4    | 82.4    | 84.2    | 88.4   | 89.9   | 79.0   | 1.03 | 6.1E-01 |
| BF2208 | hypothetical protein                                                             | 24.4    | 23.7    | 27.5    | 46.8   | 35.3   | 40.1   | 1.61 | 1.7E-02 |
| BF2209 | conserved hypothetical lipoprotein                                               | 27.2    | 25.0    | 23.5    | 36.8   | 38.1   | 24.0   | 1.28 | 2.4E-01 |
| BF2210 | putative ABC transport system, membrane protein                                  | 28.4    | 28.7    | 28.8    | 1.7    | 4.5    | 2.3    | 0.09 | 4.3E-03 |
| BF2211 | putative ABC transport system, ATP-binding protein                               | 13.6    | 15.8    | 15.8    | 3.0    | 3.9    | 2.5    | 0.20 | 1.8E-03 |
| BF2212 | putative ABC transport system, membrane protein                                  | 9.7     | 10.1    | 9.4     | 2.0    | 3.2    | 2.4    | 0.26 | 2.4E-03 |
| BF2213 | putative ABC transport system, ATP-binding protein                               | 6.5     | 8.0     | 7.7     | 3.9    | 3.6    | 2.5    | 0.45 | 1.6E-02 |
| BF2214 | putative ABC transport system, membrane protein                                  | 6.4     | 8.9     | 7.3     | 2.5    | 3.3    | 2.6    | 0.37 | 5.3E-03 |
| BF2215 | putative ABC transport system, membrane protein                                  | 5.8     | 7.1     | 8.1     | 2.5    | 3.6    | 3.3    | 0.44 | 1.3E-02 |
| BF2216 | putative MatE-family transport-related membrane protein                          | 71.4    | 69.4    | 68.6    | 48.1   | 43.4   | 44.9   | 0.65 | 1.2E-03 |
| BF2217 | putative hydrolase                                                               | 115.0   | 97.9    | 107.8   | 170.0  | 163.9  | 143.7  | 1.49 | 1.2E-02 |
| pyrD2  | dihydroorotate dehydrogenase                                                     | 35.1    | 29.4    | 27.7    | 28.4   | 26.7   | 29.1   | 0.92 | 3.8E-01 |
| BF2219 | hypothetical protein                                                             | 13.9    | 17.6    | 15.3    | 9.2    | 7.1    | 9.5    | 0.55 | 1.5E-02 |
| panB   | 3-methyl-2-oxobutanoate hydroxymethyltransferase                                 | 213.2   | 199.8   | 226.2   | 227.7  | 203.0  | 226.1  | 1.03 | 6.8E-01 |
| BF2221 | putative transport-related membrane protein                                      | 217.1   | 215.2   | 212.1   | 199.3  | 206.6  | 197.7  | 0.94 | 2.6E-02 |
| BF2222 | putative diacylglycerol kinase                                                   | 232.1   | 244.4   | 232.5   | 158.2  | 174.2  | 143.9  | 0.67 | 7.1E-03 |
| relA   | GTP pyrophosphokinase                                                            | 258.5   | 243.9   | 245.5   | 193.8  | 198.8  | 197.7  | 0.79 | 1.6E-03 |
| BF2224 | hypothetical protein                                                             | 201.3   | 219.7   | 206.1   | 341.1  | 357.6  | 316.1  | 1.62 | 2.1E-03 |
| BF2225 | putative RNA-binding protein                                                     | 14612.6 | 14346.7 | 15638.1 | 1271.3 | 1841.1 | 2194.4 | 0.12 | 1.2E-03 |
| purT   | 5'-phosphoribosylglycinamide transformylase                                      | 170.9   | 160.7   | 162.7   | 252.8  | 233.9  | 246.2  | 1.48 | 1.2E-03 |

|        |                                                                     |        |        |        |        |        |        |      |         |
|--------|---------------------------------------------------------------------|--------|--------|--------|--------|--------|--------|------|---------|
| atpD   | ATP synthase subunit B                                              | 676.8  | 630.0  | 612.9  | 239.5  | 238.6  | 244.3  | 0.38 | 1.1E-04 |
| atpC   | ATP synthase epsilon chain                                          | 493.5  | 487.5  | 421.8  | 208.0  | 233.4  | 191.3  | 0.45 | 2.3E-03 |
| BF2229 | hypothetical protein                                                | 283.8  | 290.1  | 322.5  | 98.2   | 133.3  | 113.2  | 0.38 | 2.6E-03 |
| BF2230 | putative ATP synthase A chain                                       | 298.4  | 315.6  | 283.9  | 129.5  | 140.3  | 131.4  | 0.45 | 3.7E-04 |
| atpE   | ATP synthase C chain                                                | 266.0  | 307.7  | 277.1  | 202.2  | 202.7  | 215.2  | 0.73 | 8.2E-03 |
| BF2232 | putative ATP synthase B chain                                       | 575.4  | 473.4  | 440.9  | 393.6  | 352.8  | 375.3  | 0.76 | 5.6E-02 |
| BF2233 | putative ATP synthase delta chain                                   | 415.2  | 378.4  | 365.4  | 282.9  | 290.2  | 288.5  | 0.74 | 5.6E-03 |
| atpA   | ATP synthase subunit A                                              | 390.0  | 369.3  | 346.9  | 269.2  | 255.5  | 283.7  | 0.73 | 7.2E-03 |
| atpG   | ATP synthase gamma chain                                            | 448.1  | 425.5  | 404.4  | 258.4  | 270.7  | 251.7  | 0.61 | 1.1E-03 |
| BF2236 | putative helicase                                                   | 81.7   | 76.5   | 76.9   | 91.4   | 84.2   | 81.9   | 1.09 | 1.3E-01 |
| BF2237 | putative thioredoxin                                                | 221.9  | 190.8  | 207.9  | 233.8  | 279.8  | 198.7  | 1.14 | 3.7E-01 |
| BF2238 | putative cation efflux-related outer membrane exported protein      | 90.3   | 80.1   | 93.5   | 111.4  | 113.1  | 85.9   | 1.17 | 2.6E-01 |
| BF2239 | putative cation efflux-related lipoprotein                          | 98.7   | 81.3   | 88.8   | 111.0  | 112.4  | 102.8  | 1.22 | 6.1E-02 |
| BF2240 | putative cation efflux-related membrane protein                     | 108.9  | 97.0   | 97.2   | 106.0  | 120.5  | 106.9  | 1.10 | 2.3E-01 |
| BF2241 | putative two component system response regulator                    | 87.3   | 80.6   | 74.8   | 98.4   | 92.0   | 107.3  | 1.23 | 5.6E-02 |
| BF2242 | putative two component system sensor histidine kinase               | 67.1   | 66.4   | 60.1   | 77.1   | 78.0   | 74.1   | 1.19 | 2.4E-02 |
| BF2243 | putative MarC-family antibiotic resistance related membrane protein | 42.3   | 46.2   | 50.7   | 19.3   | 20.6   | 20.1   | 0.43 | 7.8E-04 |
| BF2244 | putative hydrolase lipoprotein                                      | 28.7   | 26.9   | 24.0   | 37.7   | 35.6   | 45.0   | 1.48 | 2.4E-02 |
| BF2245 | putative cobalamin synthesis related methyltransferase protein      | 41.9   | 44.8   | 36.2   | 52.4   | 53.1   | 58.8   | 1.34 | 3.1E-02 |
| BF2246 | putative exported periplasmic protein                               | 156.6  | 151.3  | 129.7  | 106.1  | 103.8  | 122.9  | 0.76 | 4.6E-02 |
| BF2247 | putative iron transport related membrane protein                    | 107.8  | 108.9  | 84.8   | 84.3   | 84.2   | 95.7   | 0.88 | 3.1E-01 |
| BF2248 | putative iron transport related ATP-binding protein                 | 75.5   | 75.3   | 66.3   | 81.7   | 73.3   | 91.5   | 1.13 | 2.4E-01 |
| BF2249 | putative rhamnose biosynthesis-related protein                      | 50.1   | 51.2   | 51.7   | 78.5   | 72.5   | 78.7   | 1.50 | 9.5E-04 |
| BF2250 | hypothetical protein                                                | 80.6   | 62.2   | 54.6   | 73.9   | 71.5   | 71.3   | 1.11 | 4.8E-01 |
| BF2251 | hypothetical protein                                                | 22.1   | 21.8   | 22.3   | 12.9   | 12.6   | 10.0   | 0.53 | 5.2E-03 |
| BF2252 | putative two component system response regulator                    | 41.8   | 55.8   | 44.1   | 27.6   | 28.2   | 28.7   | 0.60 | 1.2E-02 |
| BF2253 | putative two component system sensor histidine kinase               | 95.4   | 109.6  | 97.9   | 23.6   | 25.3   | 26.2   | 0.25 | 1.9E-04 |
| BF2254 | hypothetical protein                                                | 7.8    | 6.9    | 5.6    | 1.1    | 1.0    | 1.6    | 0.18 | 2.9E-03 |
| BF2255 | putative sensor histidine kinase                                    | 9.0    | 6.8    | 6.6    | 1.7    | 2.1    | 3.8    | 0.33 | 2.5E-02 |
| fhs    | formate-tetrahydrofolate ligase                                     | 402.7  | 399.7  | 414.2  | 170.6  | 184.3  | 168.8  | 0.43 | 1.6E-04 |
| BF2257 | hypothetical protein                                                | 101.5  | 103.2  | 118.3  | 47.7   | 44.2   | 41.7   | 0.41 | 9.8E-04 |
| glyA   | serine hydroxymethyltransferase                                     | 1226.1 | 1146.9 | 1237.4 | 1227.8 | 1272.5 | 1199.9 | 1.03 | 5.2E-01 |
| BF2259 | hypothetical protein                                                | 56.2   | 66.7   | 70.9   | 94.7   | 102.8  | 90.3   | 1.49 | 1.7E-02 |
| BF2260 | putative flavoredoxin                                               | 131.9  | 116.9  | 132.9  | 182.5  | 195.7  | 144.6  | 1.36 | 6.4E-02 |
| pyrI   | aspartate carbamoyltransferase regulatory subunit                   | 184.5  | 166.2  | 203.6  | 302.6  | 302.9  | 247.3  | 1.54 | 2.0E-02 |
| pyrB   | aspartate carbamoyltransferase catalytic subunit                    | 160.8  | 164.8  | 173.1  | 272.2  | 266.0  | 233.0  | 1.54 | 4.6E-03 |
| BF2263 | hypothetical protein                                                | 7.7    | 13.3   | 16.0   | 5.4    | 7.2    | 4.1    | 0.46 | 7.9E-02 |
| BF2264 | hypothetical protein                                                | 5.1    | 4.6    | 4.8    | 2.0    | 2.9    | 2.4    | 0.49 | 8.4E-03 |

|        |                                                                                    |       |       |       |        |        |       |      |         |
|--------|------------------------------------------------------------------------------------|-------|-------|-------|--------|--------|-------|------|---------|
| BF2265 | putative lipoprotein                                                               | 2.2   | 3.5   | 3.0   | 1.5    | 0.7    | 1.3   | 0.40 | 4.3E-02 |
| BF2266 | hypothetical protein                                                               | 82.6  | 84.0  | 89.4  | 25.0   | 26.3   | 22.3  | 0.29 | 2.8E-04 |
| BF2267 | hypothetical protein                                                               | 77.5  | 89.7  | 95.3  | 34.0   | 36.8   | 38.9  | 0.42 | 1.6E-03 |
| BF2268 | putative peroxidase family protein                                                 | 438.3 | 448.0 | 474.6 | 305.6  | 319.6  | 269.3 | 0.66 | 5.8E-03 |
| BF2269 | putative lipoprotein                                                               | 2.1   | 2.1   | 2.7   | 0.2    | 0.3    | 0.7   | 0.14 | 2.6E-02 |
| BF2270 | hypothetical protein                                                               | 4.7   | 3.9   | 5.3   | 0.9    | 1.1    | 1.1   | 0.22 | 1.4E-03 |
| BF2271 | hypothetical protein                                                               | 137.9 | 136.4 | 150.6 | 32.2   | 31.9   | 36.1  | 0.24 | 1.5E-04 |
| BF2272 | hypothetical protein                                                               | 165.8 | 170.2 | 192.2 | 88.6   | 108.7  | 89.0  | 0.54 | 5.6E-03 |
| BF2273 | hypothetical protein                                                               | 237.7 | 233.0 | 252.2 | 205.6  | 214.2  | 178.4 | 0.83 | 5.9E-02 |
| BF2274 | 3-deoxy-manno-octulosonate<br>cytidyltransferase                                   | 367.3 | 363.9 | 414.6 | 348.8  | 398.7  | 298.4 | 0.91 | 4.3E-01 |
| BF2275 | hypothetical protein                                                               | 16.6  | 14.8  | 15.8  | 14.3   | 14.4   | 20.3  | 1.02 | 8.8E-01 |
| BF2276 | putative penicillin-binding peptidoglycan<br>biosynthesis-related exported protein | 265.5 | 259.7 | 263.6 | 197.0  | 185.7  | 182.3 | 0.72 | 1.1E-03 |
| BF2278 | putative peptidase                                                                 | 159.0 | 133.3 | 158.7 | 162.0  | 164.1  | 147.6 | 1.05 | 5.6E-01 |
| BF2279 | hypothetical protein                                                               | 422.6 | 237.4 | 301.9 | 122.8  | 144.3  | 171.6 | 0.46 | 3.3E-02 |
| prs    | ribose-phosphate pyrophosphokinase                                                 | 359.6 | 333.5 | 366.6 | 1006.2 | 956.7  | 951.1 | 2.75 | 1.4E-04 |
| BF2281 | putative two component system sensor<br>histidine kinase                           | 75.6  | 72.6  | 73.9  | 44.3   | 48.1   | 40.7  | 0.60 | 2.3E-03 |
| BF2282 | putative two component system<br>response regulator                                | 128.5 | 111.5 | 111.4 | 89.2   | 103.7  | 92.0  | 0.81 | 5.9E-02 |
| BF2283 | putative transport-related membrane<br>protein                                     | 121.1 | 118.7 | 136.7 | 78.6   | 96.7   | 78.6  | 0.67 | 1.9E-02 |
| BFt24  | tRNA-Arg-TCT                                                                       | 16.0  | 7.3   | 10.1  | 8.7    | 13.3   | 15.4  | 1.14 | 7.2E-01 |
| BF2284 | putative phage integrase                                                           | 8.2   | 11.4  | 11.7  | 5.5    | 5.3    | 4.4   | 0.49 | 1.5E-02 |
| BF2285 | hypothetical protein                                                               | 14.5  | 13.5  | 12.6  | 20.0   | 13.2   | 14.3  | 1.15 | 4.2E-01 |
| BF2286 | hypothetical protein                                                               | 7.9   | 9.3   | 10.6  | 18.2   | 17.5   | 15.9  | 1.87 | 8.0E-03 |
| BF2287 | hypothetical protein                                                               | 10.2  | 12.5  | 7.7   | 6.6    | 6.2    | 7.7   | 0.69 | 1.1E-01 |
| BF2288 | hypothetical protein                                                               | 3.8   | 3.6   | 3.2   | 4.1    | 4.1    | 4.4   | 1.18 | 7.4E-02 |
| BF2289 | hypothetical protein                                                               | 12.5  | 12.3  | 13.8  | 14.3   | 13.5   | 13.6  | 1.08 | 2.0E-01 |
| BF2290 | hypothetical protein                                                               | 7.5   | 7.7   | 6.8   | 8.6    | 9.6    | 8.5   | 1.21 | 5.1E-02 |
| BF2291 | hypothetical protein                                                               | 5.8   | 9.1   | 6.0   | 9.0    | 11.2   | 12.1  | 1.57 | 9.2E-02 |
| BF2292 | hypothetical protein                                                               | 7.8   | 4.2   | 0.9   | 8.2    | 6.4    | 9.8   | 2.62 | 2.9E-01 |
| BF2293 | hypothetical protein                                                               | 0.7   | 1.0   | 0.9   | 0.7    | 1.4    | 1.5   | 1.31 | 4.5E-01 |
| BF2294 | hypothetical protein                                                               | 1.6   | 1.7   | 1.3   | 2.2    | 2.4    | 2.2   | 1.50 | 2.9E-02 |
| BF2295 | hypothetical protein                                                               | 2.3   | 2.7   | 0.9   | 4.3    | 2.6    | 5.7   | 2.24 | 1.6E-01 |
| BF2296 | hypothetical protein                                                               | 2.9   | 2.3   | 1.6   | 2.1    | 5.9    | 4.5   | 1.72 | 2.7E-01 |
| BF2297 | hypothetical protein                                                               | 59.2  | 76.6  | 64.8  | 73.9   | 89.9   | 121.7 | 1.40 | 1.6E-01 |
| BF2298 | hypothetical protein                                                               | 207.6 | 216.0 | 227.5 | 212.5  | 236.3  | 167.8 | 0.94 | 6.4E-01 |
| BF2299 | hypothetical protein                                                               | 118.3 | 107.6 | 145.3 | 153.4  | 187.7  | 114.3 | 1.21 | 3.9E-01 |
| BF2300 | hypothetical protein                                                               | 93.3  | 99.3  | 80.7  | 53.1   | 72.2   | 59.8  | 0.67 | 4.2E-02 |
| BF2301 | putative lipoprotein                                                               | 615.3 | 659.9 | 702.9 | 1009.6 | 1029.1 | 746.1 | 1.40 | 6.8E-02 |
| BF2302 | hypothetical protein                                                               | 288.2 | 273.3 | 312.4 | 227.3  | 233.7  | 192.9 | 0.75 | 3.1E-02 |
| BF2303 | hypothetical protein                                                               | 465.3 | 539.3 | 491.1 | 418.4  | 385.3  | 715.7 | 0.98 | 9.4E-01 |
| BF2304 | hypothetical protein                                                               | 5.8   | 5.5   | 5.0   | 6.5    | 10.1   | 6.8   | 1.40 | 1.3E-01 |
| BF2305 | hypothetical protein                                                               | 5.1   | 5.4   | 3.9   | 8.9    | 7.0    | 9.4   | 1.75 | 2.8E-02 |
| BF2306 | hypothetical protein                                                               | 4.6   | 5.3   | 3.4   | 6.6    | 6.0    | 6.7   | 1.47 | 7.2E-02 |
| BF2307 | hypothetical protein                                                               | 6.3   | 6.3   | 2.9   | 9.4    | 7.3    | 7.6   | 1.65 | 1.9E-01 |
| BF2308 | hypothetical protein                                                               | 5.0   | 6.5   | 6.4   | 6.9    | 9.3    | 5.9   | 1.23 | 3.4E-01 |
| BF2309 | hypothetical protein                                                               | 45.5  | 51.9  | 52.5  | 15.0   | 18.7   | 17.5  | 0.34 | 1.1E-03 |



|         |                                                                 |        |        |        |       |        |       |      |         |
|---------|-----------------------------------------------------------------|--------|--------|--------|-------|--------|-------|------|---------|
| BF2310  | hypothetical protein                                            | 5.5    | 8.6    | 5.5    | 7.6   | 6.4    | 3.9   | 0.90 | 7.4E-01 |
| BF2311  | putative type I restriction modification system related protein | 7.3    | 7.0    | 7.0    | 7.8   | 7.7    | 4.1   | 0.88 | 6.4E-01 |
| BF2312  | hypothetical protein                                            | 5.6    | 3.7    | 5.6    | 5.1   | 5.8    | 6.8   | 1.19 | 4.2E-01 |
| BF2313  | hypothetical protein                                            | 2.3    | 2.5    | 1.9    | 1.7   | 3.0    | 3.1   | 1.12 | 7.0E-01 |
| BF2314  | hypothetical protein                                            | 2.5    | 2.6    | 2.0    | 1.2   | 3.5    | 4.1   | 1.09 | 8.7E-01 |
| BF2315  | hypothetical protein                                            | 4.2    | 4.9    | 6.4    | 4.7   | 4.0    | 8.5   | 1.07 | 8.4E-01 |
| BF2316  | hypothetical protein                                            | 40.9   | 38.2   | 30.5   | 62.0  | 58.7   | 74.8  | 1.79 | 1.7E-02 |
| BF2317  | hypothetical protein                                            | 59.3   | 78.7   | 67.7   | 104.3 | 103.0  | 103.7 | 1.52 | 1.7E-02 |
| BF2318  | hypothetical protein                                            | 55.2   | 64.3   | 52.1   | 97.7  | 88.2   | 108.2 | 1.71 | 9.5E-03 |
| BF2319  | hypothetical protein                                            | 89.9   | 96.9   | 87.2   | 138.9 | 135.1  | 152.8 | 1.56 | 3.4E-03 |
| BF2320  | hypothetical protein                                            | 15.5   | 18.9   | 22.6   | 19.4  | 29.1   | 29.0  | 1.35 | 2.1E-01 |
| BF2321  | hypothetical protein                                            | 12.9   | 20.5   | 16.3   | 45.4  | 45.2   | 40.3  | 2.68 | 6.9E-03 |
| BF2322  | hypothetical protein                                            | 6.4    | 5.1    | 4.1    | 7.6   | 10.5   | 4.1   | 1.34 | 4.6E-01 |
| BF2323  | hypothetical protein                                            | 21.9   | 17.1   | 17.7   | 9.6   | 13.6   | 10.3  | 0.59 | 3.2E-02 |
| BF2324  | putative single-strand binding protein                          | 6.8    | 4.8    | 8.0    | 4.7   | 4.2    | 5.2   | 0.73 | 1.8E-01 |
| BF2325  | putative DNA primase                                            | 3.7    | 4.1    | 4.5    | 4.9   | 5.1    | 4.8   | 1.21 | 5.7E-02 |
| BF2326  | hypothetical protein                                            | 1.3    | 2.3    | 2.9    | 4.5   | 1.0    | 2.9   | 1.15 | 8.3E-01 |
| BF2327  | putative lipoprotein                                            | 1.1    | 0.6    | 1.5    | 1.1   | 2.3    | 1.9   | 1.64 | 3.1E-01 |
| 5S      |                                                                 | 2411.0 | 157.8  | 1128.0 | 23.7  | 45.2   | 127.3 | 0.07 | 7.8E-02 |
| BF2328  | hypothetical protein                                            | 2.2    | 0.8    | 4.9    | 2.1   | 1.7    | 2.1   | 0.97 | 9.6E-01 |
| BF2329  | hypothetical protein                                            | 2.0    | 0.0    | 2.2    | 0.0   | 4.7    | 2.9   | 1.74 | 2.1E-01 |
| BF2329A | hypothetical protein                                            | 2.7    | 1.4    | 0.0    | 3.2   | 3.1    | 1.9   | 1.37 | 5.2E-01 |
| BF2330  | putative DNA binding protein                                    | 8.6    | 5.8    | 7.0    | 6.9   | 5.2    | 7.8   | 0.93 | 7.5E-01 |
| BF2331  | hypothetical protein                                            | 3.5    | 3.7    | 4.6    | 2.0   | 6.5    | 3.4   | 0.90 | 8.1E-01 |
| BF2332  | hypothetical protein                                            | 264.2  | 228.8  | 298.8  | 336.9 | 375.1  | 240.1 | 1.19 | 4.0E-01 |
| BF2334  | hypothetical protein                                            | 505.9  | 484.2  | 498.1  | 993.7 | 1088.2 | 820.2 | 1.94 | 5.1E-03 |
| BF2335  | para-aminobenzoate synthase component I                         | 28.9   | 26.9   | 34.0   | 35.2  | 34.0   | 30.1  | 1.11 | 3.5E-01 |
| BF2336  | hypothetical protein                                            | 38.1   | 32.1   | 42.0   | 55.5  | 50.0   | 43.1  | 1.33 | 9.4E-02 |
| BF2337  | hypothetical protein                                            | 225.2  | 260.4  | 269.8  | 210.2 | 257.7  | 177.4 | 0.85 | 3.1E-01 |
| BF2338  | putative hydrolase                                              | 225.7  | 216.5  | 247.5  | 266.9 | 276.4  | 225.5 | 1.11 | 2.9E-01 |
| BF2339  | putative amylase                                                | 165.6  | 168.5  | 166.6  | 136.7 | 142.7  | 108.6 | 0.77 | 6.3E-02 |
| BF2340  | putative oxidoreductase                                         | 158.5  | 152.8  | 171.9  | 131.1 | 148.2  | 111.9 | 0.81 | 1.1E-01 |
| BF2341  | hypothetical protein                                            | 205.3  | 208.2  | 235.0  | 172.0 | 184.5  | 152.3 | 0.78 | 4.8E-02 |
| fsr     | putative fosmidomycin resistance protein                        | 18.7   | 19.3   | 20.3   | 16.1  | 12.6   | 13.4  | 0.72 | 2.7E-02 |
| BF2343  | putative glutamine synthetase I                                 | 65.5   | 69.5   | 75.6   | 164.6 | 190.7  | 143.0 | 2.35 | 3.3E-03 |
| BF2344  | conserved putative DNA-binding hypothetical protein             | 18.8   | 26.4   | 28.7   | 46.8  | 41.8   | 41.3  | 1.78 | 2.8E-02 |
| BF2345  | putative oxidoreductase                                         | 68.0   | 56.3   | 66.4   | 38.2  | 39.5   | 30.3  | 0.56 | 1.3E-02 |
| BF2346  | hypothetical protein                                            | 236.8  | 236.3  | 217.3  | 122.0 | 122.7  | 112.9 | 0.52 | 6.2E-04 |
| BF2347  | hypothetical protein                                            | 241.2  | 255.6  | 231.3  | 121.0 | 140.1  | 138.6 | 0.55 | 2.0E-03 |
| BF2347A | hypothetical protein                                            | 109.5  | 113.0  | 116.0  | 4.6   | 3.8    | 4.7   | 0.04 | 3.7E-05 |
| BF2347B | hypothetical protein                                            | 2796.2 | 2448.4 | 3063.3 | 61.8  | 33.1   | 51.9  | 0.02 | 3.7E-04 |
| BF2348  | hypothetical protein                                            | 54.4   | 53.9   | 54.9   | 17.6  | 14.7   | 21.4  | 0.33 | 2.4E-03 |
| BF2349  | hypothetical protein                                            | 514.9  | 587.2  | 529.5  | 331.5 | 308.2  | 303.9 | 0.58 | 1.8E-03 |
| sucD    | succinyl-CoA synthetase alpha chain                             | 429.6  | 412.1  | 410.0  | 292.2 | 278.3  | 307.0 | 0.70 | 1.9E-03 |
| sucC    | succinyl-CoA synthetase beta chain                              | 470.1  | 494.9  | 456.9  | 319.6 | 327.5  | 355.8 | 0.70 | 3.8E-03 |
| fabD    | malonyl CoA-acyl carrier protein transacylase                   | 439.5  | 494.6  | 487.9  | 776.9 | 746.5  | 721.5 | 1.58 | 2.2E-03 |

|        |                                                                        |        |        |        |        |        |        |       |         |
|--------|------------------------------------------------------------------------|--------|--------|--------|--------|--------|--------|-------|---------|
| thiD   | phosphomethylpyrimidine kinase                                         | 40.6   | 35.6   | 39.6   | 51.1   | 47.0   | 47.7   | 1.26  | 2.0E-02 |
| BF2354 | hypothetical protein                                                   | 8.9    | 11.8   | 9.8    | 312.5  | 383.7  | 298.3  | 32.59 | 1.2E-04 |
| BF2355 | putative xylulose kinase                                               | 6.0    | 5.1    | 5.5    | 215.0  | 224.2  | 207.6  | 38.95 | 6.4E-06 |
| BF2356 | xylulose isomerase                                                     | 14.3   | 12.4   | 15.5   | 606.4  | 604.0  | 554.3  | 42.03 | 2.2E-05 |
| BF2357 | putative sugar-transport membrane protein                              | 6.0    | 8.2    | 5.4    | 290.3  | 314.5  | 258.5  | 44.88 | 1.7E-04 |
| BF2358 | putative phosphodiesterase-nucleotide pyrophosphatase                  | 143.5  | 155.9  | 139.3  | 134.7  | 116.9  | 124.8  | 0.86  | 7.4E-02 |
| BF2359 | putative carbon-nitrogen hydrolase                                     | 47.2   | 47.1   | 50.1   | 45.2   | 40.4   | 40.0   | 0.87  | 5.8E-02 |
| BF2360 | putative thioredoxin peroxidase                                        | 1258.9 | 1599.9 | 1634.8 | 1401.0 | 1727.9 | 1483.6 | 1.03  | 8.3E-01 |
| rbp    | RNA binding protein                                                    | 3607.2 | 4435.8 | 4696.4 | 1145.5 | 1562.1 | 1297.8 | 0.31  | 2.9E-03 |
| ccp    | cytochrome-C peroxidase                                                | 203.5  | 288.3  | 300.7  | 64.0   | 69.4   | 68.8   | 0.26  | 2.1E-03 |
| BF2363 | putative cytochrome C biogenesis-related protein                       | 189.2  | 185.3  | 184.7  | 73.4   | 105.0  | 78.4   | 0.45  | 6.5E-03 |
| BF2364 | hypothetical protein                                                   | 336.8  | 299.5  | 328.7  | 277.8  | 338.6  | 275.5  | 0.92  | 4.1E-01 |
| BF2365 | hypothetical protein                                                   | 24.5   | 25.6   | 26.9   | 24.6   | 30.7   | 20.3   | 0.97  | 8.4E-01 |
| BF2366 | hypothetical protein                                                   | 47.4   | 45.4   | 46.4   | 14.3   | 16.0   | 13.2   | 0.31  | 3.6E-04 |
| ileS   | isoleucyl-tRNA synthetase                                              | 391.4  | 383.7  | 411.9  | 347.8  | 352.8  | 302.7  | 0.84  | 5.8E-02 |
| BF2368 | putative regulatory protein                                            | 1206.5 | 1212.3 | 1176.5 | 1314.6 | 1439.7 | 1179.6 | 1.09  | 2.7E-01 |
| BF2369 | putative signal peptidase                                              | 403.6  | 443.9  | 475.8  | 394.4  | 444.1  | 340.2  | 0.89  | 3.3E-01 |
| BF2370 | putative lipoprotein                                                   | 227.5  | 221.7  | 253.5  | 231.4  | 251.5  | 199.7  | 0.97  | 7.6E-01 |
| BF2371 | hypothetical protein                                                   | 117.1  | 133.1  | 141.9  | 94.3   | 117.0  | 97.5   | 0.79  | 8.4E-02 |
| BF2372 | putative tRNA/rRNA methyltransferase                                   | 182.7  | 170.4  | 200.2  | 141.8  | 147.7  | 111.7  | 0.72  | 5.3E-02 |
| BF2373 | hypothetical protein                                                   | 51.9   | 50.1   | 52.3   | 74.0   | 80.8   | 70.3   | 1.46  | 3.7E-03 |
| BF2374 | putative surface membrane protein                                      | 44.9   | 40.8   | 46.5   | 49.2   | 52.5   | 41.7   | 1.08  | 4.4E-01 |
| BF2375 | hypothetical protein                                                   | 2202.6 | 1929.0 | 2416.7 | 2131.3 | 2429.8 | 1772.4 | 0.96  | 8.0E-01 |
| BF2376 | hypothetical protein                                                   | 864.5  | 977.9  | 937.4  | 236.7  | 297.1  | 202.9  | 0.26  | 1.7E-03 |
| BF2377 | hypothetical protein                                                   | 328.5  | 332.0  | 324.9  | 415.9  | 475.9  | 331.8  | 1.23  | 1.8E-01 |
| BFt25  | tRNA-Lys-CTT                                                           | 43.0   | 64.2   | 51.1   | 28.6   | 37.6   | 50.1   | 0.73  | 2.4E-01 |
| BF2378 | hypothetical protein                                                   | 15.6   | 12.8   | 16.1   | 12.4   | 12.3   | 13.0   | 0.85  | 1.4E-01 |
| BF2379 | hypothetical protein                                                   | 77.0   | 85.3   | 93.6   | 21.8   | 18.7   | 19.1   | 0.23  | 4.1E-04 |
| BFt26  | tRNA-Lys-CTT                                                           | 43.0   | 64.2   | 51.1   | 28.6   | 37.6   | 50.1   | 0.73  | 2.4E-01 |
| BF2380 | putative metallo-beta-lactamase superfamily protein                    | 215.3  | 215.5  | 252.1  | 201.6  | 202.8  | 175.0  | 0.85  | 1.3E-01 |
| BF2381 | putative transport-related membrane protein                            | 49.7   | 50.8   | 55.1   | 118.8  | 114.7  | 92.9   | 2.09  | 3.7E-03 |
| uxaC   | uronate isomerase                                                      | 51.7   | 47.9   | 57.0   | 55.5   | 67.1   | 49.7   | 1.09  | 4.9E-01 |
| BF2383 | hypothetical protein                                                   | 258.4  | 261.1  | 246.7  | 308.5  | 283.1  | 254.9  | 1.10  | 2.3E-01 |
| BF2384 | hypothetical protein                                                   | 411.4  | 369.2  | 408.4  | 293.8  | 313.0  | 263.2  | 0.73  | 1.7E-02 |
| rfbC2  | putative LPS biosynthesis related dTDP-4-dehydrorhamnose 3,5-epimerase | 92.6   | 69.7   | 78.2   | 87.1   | 87.4   | 79.9   | 1.06  | 5.9E-01 |
| rkpK   | UDP-glucose 6-dehydrogenase                                            | 154.6  | 144.7  | 159.4  | 231.5  | 234.5  | 202.9  | 1.46  | 7.1E-03 |
| BF2387 | putative lipoprotein                                                   | 82.0   | 79.5   | 88.9   | 78.7   | 88.2   | 77.8   | 0.98  | 7.4E-01 |
| rhIE   | putative ATP-dependent RNA helicase                                    | 287.8  | 284.7  | 307.8  | 309.5  | 321.6  | 307.7  | 1.07  | 1.2E-01 |
| BF2389 | putative phosphoserine phosphatase                                     | 258.5  | 219.1  | 258.4  | 152.6  | 165.2  | 153.1  | 0.64  | 6.1E-03 |
| BF2390 | hypothetical protein                                                   | 2539.5 | 2428.9 | 2547.3 | 924.7  | 902.1  | 1038.6 | 0.38  | 3.6E-04 |
| BF2391 | hypothetical protein                                                   | 182.7  | 187.0  | 186.2  | 124.6  | 136.4  | 113.3  | 0.67  | 6.0E-03 |
| tgt    | queuine tRNA-ribosyltransferase                                        | 288.5  | 286.3  | 280.4  | 230.2  | 229.9  | 208.6  | 0.78  | 6.1E-03 |
| lon    | ATP-dependent protease                                                 | 437.4  | 431.6  | 395.1  | 253.9  | 249.3  | 253.1  | 0.60  | 7.2E-04 |
| BF2394 | hypothetical protein                                                   | 28.4   | 38.6   | 35.6   | 53.4   | 53.8   | 48.8   | 1.53  | 2.6E-02 |

|         |                      |        |        |        |        |        |        |      |         |
|---------|----------------------|--------|--------|--------|--------|--------|--------|------|---------|
| BF2395  | hypothetical protein | 29.6   | 28.3   | 37.0   | 47.9   | 47.3   | 50.1   | 1.54 | 1.7E-02 |
| BF2396  | hypothetical protein | 24.1   | 30.8   | 26.5   | 35.2   | 52.5   | 37.9   | 1.53 | 6.9E-02 |
| BF2397  | hypothetical protein | 104.0  | 109.6  | 119.0  | 154.3  | 165.2  | 156.2  | 1.43 | 4.7E-03 |
| BF2398  | hypothetical protein | 66.5   | 64.3   | 75.5   | 100.7  | 107.5  | 109.3  | 1.54 | 5.0E-03 |
| BF2399  | hypothetical protein | 100.2  | 90.0   | 110.0  | 177.0  | 196.7  | 150.8  | 1.74 | 1.2E-02 |
| BF2400  | hypothetical protein | 87.7   | 74.6   | 83.0   | 137.5  | 157.4  | 132.8  | 1.74 | 5.0E-03 |
| BF2402  | hypothetical protein | 0.6    | 2.2    | 1.3    | 0.5    | 0.3    | 0.8    | 0.46 | 2.3E-01 |
| BF2403  | hypothetical protein | 1.2    | 0.7    | 0.0    | 1.2    | 0.7    | 0.0    | 1.02 | 9.8E-01 |
| BF2404  | putative lipoprotein | 1.4    | 0.8    | 0.0    | 1.4    | 0.0    | 1.4    | 1.31 | 5.6E-01 |
| BF2405  | hypothetical protein | 0.0    | 0.4    | 0.4    | 1.1    | 1.8    | 0.4    | 2.15 | 2.6E-01 |
| BF2406  | hypothetical protein | 0.5    | 0.5    | 0.5    | 0.9    | 0.0    | 1.4    | 2.22 | 5.7E-02 |
| BF2407  | hypothetical protein | 0.8    | 0.0    | 0.9    | 0.0    | 0.0    | 0.8    | 0.91 |         |
| BF2408  | hypothetical protein | 0.0    | 0.6    | 0.7    | 1.1    | 0.0    | 1.1    | 1.76 | 4.1E-03 |
| BF2409  | hypothetical protein | 0.0    | 0.4    | 1.3    | 0.7    | 0.5    | 0.8    | 0.86 | 8.5E-01 |
| BF2410  | hypothetical protein | 2.0    | 0.0    | 1.1    | 0.9    | 0.0    | 1.0    | 0.64 | 3.5E-01 |
| BF2411  | hypothetical protein | 1.1    | 1.1    | 0.6    | 1.0    | 1.2    | 1.0    | 1.22 | 5.0E-01 |
| BF2412  | hypothetical protein | 0.0    | 0.5    | 0.0    | 1.9    | 0.0    | 0.0    | 3.56 |         |
| BF2413  | hypothetical protein | 1.5    | 3.1    | 0.8    | 0.0    | 3.4    | 1.4    | 1.41 | 6.6E-01 |
| BF2414  | hypothetical protein | 1.9    | 0.7    | 0.0    | 0.0    | 0.0    | 0.6    | 0.54 |         |
| BF2415  | hypothetical protein | 1.8    | 2.1    | 0.9    | 1.1    | 2.0    | 0.9    | 0.88 | 7.8E-01 |
| BF2416  | hypothetical protein | 2.0    | 1.3    | 1.6    | 1.2    | 1.4    | 1.2    | 0.78 | 1.9E-01 |
| BF2417  | hypothetical protein | 2.9    | 0.8    | 0.8    | 0.3    | 0.8    | 1.0    | 0.55 | 4.1E-01 |
| BF2418  | hypothetical protein | 1.5    | 0.0    | 0.4    | 1.5    | 1.3    | 1.5    | 1.76 | 5.2E-01 |
| BF2419  | putative proteinase  | 2.5    | 4.6    | 3.4    | 1.9    | 2.4    | 4.7    | 0.83 | 6.6E-01 |
| BF2420  | hypothetical protein | 8.1    | 7.7    | 6.1    | 5.3    | 5.7    | 8.0    | 0.86 | 4.5E-01 |
| BF2421  | hypothetical protein | 9.3    | 6.2    | 6.4    | 7.6    | 4.7    | 8.3    | 0.93 | 8.0E-01 |
| BF2422  | hypothetical protein | 1.7    | 2.8    | 1.0    | 2.5    | 0.4    | 4.5    | 1.00 | 1.0E+00 |
| BF2423  | hypothetical protein | 0.5    | 0.0    | 1.1    | 2.4    | 0.0    | 3.0    | 3.52 | 1.4E-01 |
| BF2424  | hypothetical protein | 2.9    | 3.6    | 1.4    | 2.7    | 1.8    | 3.5    | 1.05 | 9.1E-01 |
| BF2425  | hypothetical protein | 3.8    | 4.9    | 3.4    | 3.5    | 2.5    | 6.2    | 0.95 | 9.0E-01 |
| BF2426  | hypothetical protein | 1.6    | 1.7    | 1.1    | 0.9    | 1.1    | 1.3    | 0.76 | 2.4E-01 |
| BF2427  | putative lipoprotein | 1.6    | 1.7    | 0.4    | 2.2    | 0.4    | 4.4    | 1.52 | 7.2E-01 |
| BF2428  | hypothetical protein | 0.6    | 1.3    | 2.0    | 1.7    | 1.4    | 0.6    | 0.97 | 9.6E-01 |
| BF2429  | hypothetical protein | 1.4    | 1.1    | 1.4    | 0.7    | 1.4    | 1.6    | 0.90 | 7.4E-01 |
| BF2430  | hypothetical protein | 102.6  | 107.4  | 96.1   | 70.3   | 79.6   | 65.0   | 0.70 | 1.5E-02 |
| BF2431  | hypothetical protein | 258.0  | 302.1  | 272.9  | 148.1  | 164.4  | 248.3  | 0.66 | 1.0E-01 |
| BF2432  | hypothetical protein | 0.2    | 1.6    | 0.4    | 1.1    | 0.4    | 2.5    | 2.11 | 4.8E-01 |
| BF2433  | hypothetical protein | 1.1    | 0.9    | 1.0    | 1.0    | 0.8    | 1.3    | 1.00 | 9.9E-01 |
| BF2434  | hypothetical protein | 0.9    | 0.9    | 1.0    | 0.4    | 0.0    | 0.9    | 0.64 | 3.7E-01 |
| BF2435  | hypothetical protein | 0.4    | 0.4    | 0.4    | 1.9    | 0.9    | 0.4    | 2.08 | 2.5E-01 |
| BF2436  | hypothetical protein | 1.0    | 2.5    | 1.2    | 1.2    | 0.9    | 1.0    | 0.72 | 3.9E-01 |
| BF2437  | hypothetical protein | 0.6    | 0.8    | 0.7    | 0.6    | 0.2    | 1.2    | 0.71 | 6.2E-01 |
| BF2438  | hypothetical protein | 1.5    | 1.3    | 0.6    | 1.4    | 0.3    | 1.0    | 0.66 | 5.6E-01 |
| BF2439  | hypothetical protein | 0.6    | 3.1    | 1.0    | 1.4    | 0.9    | 1.6    | 1.01 | 9.9E-01 |
| BF2439A | hypothetical protein | 4.0    | 5.1    | 5.3    | 2.1    | 1.6    | 2.7    | 0.45 | 2.1E-02 |
| BF2439B | hypothetical protein | 6.8    | 7.5    | 8.7    | 4.5    | 4.2    | 4.6    | 0.59 | 7.0E-03 |
| BF2440  | hypothetical protein | 0.4    | 2.2    | 0.0    | 0.0    | 0.5    | 1.2    | 0.79 | 8.6E-01 |
| BF2441  | hypothetical protein | 1166.1 | 1209.1 | 1508.0 | 1796.0 | 1751.3 | 1392.2 | 1.27 | 1.5E-01 |
| BF2442  | hypothetical protein | 141.6  | 121.8  | 103.7  | 11.8   | 10.2   | 10.0   | 0.09 | 2.7E-04 |
| BF2443  | hypothetical protein | 280.2  | 329.9  | 368.6  | 30.4   | 31.0   | 31.8   | 0.10 | 1.5E-04 |
| BF2444  | putative integrase   | 80.2   | 71.5   | 86.5   | 30.8   | 27.9   | 29.0   | 0.37 | 7.0E-04 |

|        |                                                                 |        |        |        |        |       |       |      |         |
|--------|-----------------------------------------------------------------|--------|--------|--------|--------|-------|-------|------|---------|
| BFt27  | tRNA-Pro-TGG                                                    | 29.4   | 45.7   | 32.4   | 21.4   | 5.8   | 84.6  | 0.62 | 6.4E-01 |
| BFt28  | tRNA-Pro-TGG                                                    | 54.3   | 65.0   | 27.4   | 30.0   | 20.4  | 86.8  | 0.82 | 7.6E-01 |
| BF2445 | hypothetical protein                                            | 1488.2 | 1249.5 | 1188.9 | 329.9  | 252.8 | 260.5 | 0.21 | 9.6E-04 |
| BF2447 | putative conserved membrane protein                             | 212.1  | 203.1  | 206.2  | 40.1   | 52.0  | 44.1  | 0.22 | 4.1E-04 |
| BF2448 | hypothetical protein                                            | 766.7  | 758.3  | 648.8  | 273.9  | 267.7 | 310.3 | 0.39 | 1.2E-03 |
| BF2449 | putative two component system histidine kinase                  | 205.3  | 201.6  | 200.2  | 87.4   | 79.3  | 93.1  | 0.43 | 5.3E-04 |
| BF2450 | putative two component system response regulator                | 30.4   | 25.4   | 23.9   | 32.8   | 33.8  | 37.5  | 1.31 | 5.4E-02 |
| BF2451 | putative exported outer membrane protein                        | 0.8    | 1.0    | 0.7    | 1.2    | 0.7   | 0.8   | 1.07 | 8.0E-01 |
| BF2452 | hypothetical protein                                            | 0.3    | 0.0    | 0.5    | 1.7    | 2.0   | 1.4   | 4.59 | 2.5E-02 |
| BF2453 | putative conserved membrane protein                             | 2.7    | 2.7    | 3.4    | 3.7    | 4.0   | 3.8   | 1.32 | 4.3E-02 |
| BF2454 | putative ABC transport system, membrane protein                 | 4.7    | 3.4    | 3.6    | 3.4    | 3.2   | 3.8   | 0.88 | 3.7E-01 |
| BF2455 | putative ABC transport system, membrane protein                 | 2.9    | 2.6    | 2.3    | 4.2    | 4.1   | 2.3   | 1.32 | 3.3E-01 |
| BF2456 | hypothetical protein                                            | 1.5    | 2.0    | 2.7    | 3.1    | 4.5   | 3.3   | 1.79 | 8.1E-02 |
| BF2457 | hypothetical protein                                            | 1.5    | 1.7    | 1.6    | 1.6    | 2.1   | 1.1   | 0.98 | 9.5E-01 |
| BF2458 | hypothetical protein                                            | 2.3    | 1.7    | 2.2    | 1.6    | 2.1   | 1.7   | 0.87 | 4.2E-01 |
| BF2459 | putative ABC transport system, ATP-binding protein              | 53.9   | 51.7   | 56.7   | 52.3   | 59.0  | 41.1  | 0.93 | 6.1E-01 |
| BF2460 | hypothetical protein                                            | 54.9   | 52.1   | 64.8   | 18.6   | 28.0  | 29.5  | 0.44 | 1.6E-02 |
| BF2461 | putative 8-amino-7-oxononanoate synthase                        | 610.8  | 384.2  | 594.1  | 315.3  | 375.5 | 397.8 | 0.70 | 1.4E-01 |
| BF2462 | hypothetical protein                                            | 172.4  | 167.0  | 186.9  | 148.0  | 148.3 | 134.6 | 0.82 | 2.7E-02 |
| aspS   | aspartyl-tRNA synthetase                                        | 522.7  | 538.6  | 577.8  | 623.8  | 634.2 | 578.5 | 1.12 | 8.2E-02 |
| BF2464 | hypothetical protein                                            | 740.3  | 754.7  | 828.8  | 660.2  | 721.9 | 614.1 | 0.86 | 9.4E-02 |
| BF2465 | putative hydrolase                                              | 174.1  | 163.7  | 171.0  | 165.7  | 178.7 | 163.0 | 1.00 | 9.4E-01 |
| BF2466 | putative deiminase                                              | 94.9   | 76.4   | 93.5   | 94.4   | 106.2 | 78.4  | 1.05 | 7.4E-01 |
| BF2467 | hypothetical protein                                            | 87.9   | 88.5   | 88.7   | 97.2   | 115.7 | 116.4 | 1.24 | 4.2E-02 |
| BF2468 | putative ABC transport system, ATP-binding protein              | 85.0   | 77.4   | 90.1   | 64.9   | 79.3  | 73.6  | 0.86 | 1.6E-01 |
| BF2469 | putative ABC transport system, membrane protein                 | 36.2   | 30.0   | 41.5   | 30.3   | 31.1  | 31.1  | 0.87 | 2.7E-01 |
| BF2470 | hypothetical protein                                            | 20.7   | 15.8   | 22.1   | 20.8   | 19.5  | 24.8  | 1.12 | 5.0E-01 |
| BF2471 | hypothetical protein                                            | 119.9  | 123.7  | 142.2  | 193.4  | 220.8 | 167.1 | 1.50 | 2.8E-02 |
| BF2472 | hypothetical protein                                            | 161.5  | 165.9  | 169.4  | 183.4  | 194.9 | 179.1 | 1.12 | 3.3E-02 |
| BF2473 | hypothetical protein                                            | 180.2  | 157.5  | 177.4  | 161.9  | 175.2 | 161.4 | 0.97 | 6.3E-01 |
| BF2474 | hypothetical protein                                            | 781.5  | 742.3  | 865.1  | 1024.3 | 982.6 | 917.2 | 1.23 | 4.1E-02 |
| BF2475 | putative outer membrane exported protein                        | 43.4   | 52.8   | 43.8   | 10.3   | 10.0  | 11.3  | 0.23 | 3.9E-04 |
| BF2476 | putative transport-related protein                              | 43.0   | 48.2   | 41.2   | 11.3   | 10.2  | 12.0  | 0.25 | 3.7E-04 |
| BF2477 | putative drug resistance transport-related membrane protein     | 60.3   | 71.6   | 61.6   | 16.9   | 17.3  | 18.3  | 0.27 | 3.1E-04 |
| BF2478 | hypothetical protein                                            | 54.1   | 62.6   | 54.4   | 56.5   | 60.8  | 56.0  | 1.02 | 8.4E-01 |
| BF2479 | AMP nucleosidase                                                | 189.9  | 171.7  | 170.8  | 174.8  | 184.6 | 160.1 | 0.98 | 7.2E-01 |
| BF2480 | hypothetical protein                                            | 119.9  | 124.9  | 132.8  | 119.0  | 119.8 | 113.5 | 0.93 | 1.6E-01 |
| BF2481 | putative DNA-binding protein                                    | 11.2   | 10.7   | 8.5    | 30.4   | 34.9  | 17.1  | 2.61 | 3.1E-02 |
| pyrK   | putative dihydroorotate dehydrogenase electron transfer subunit | 136.5  | 119.8  | 153.3  | 136.7  | 129.1 | 124.8 | 0.96 | 6.6E-01 |

|        |                                                          |        |        |        |        |        |        |      |         |
|--------|----------------------------------------------------------|--------|--------|--------|--------|--------|--------|------|---------|
| pyrD1  | putative dihydroorotate dehydrogenase, catalytic subunit | 120.9  | 117.1  | 133.6  | 128.7  | 130.8  | 118.0  | 1.02 | 8.0E-01 |
| trmD   | tRNA (guanine-N(1)-)-methyltransferase                   | 105.1  | 112.4  | 117.8  | 111.7  | 123.2  | 98.4   | 0.99 | 9.3E-01 |
| ligA   | putative DNA ligase                                      | 132.1  | 118.4  | 127.3  | 111.4  | 119.7  | 105.0  | 0.89 | 1.2E-01 |
| dapA2  | putative dihydrodipicolinate synthase                    | 534.1  | 543.3  | 566.8  | 444.5  | 412.9  | 389.9  | 0.76 | 8.0E-03 |
| BF2487 | putative chloramphenicol acetyltransferase               | 57.4   | 59.6   | 69.7   | 133.9  | 138.1  | 126.6  | 2.14 | 1.7E-03 |
| BF2488 | hypothetical protein                                     | 67.3   | 64.1   | 77.7   | 95.0   | 104.1  | 64.6   | 1.24 | 3.1E-01 |
| BF2489 | hypothetical protein                                     | 145.1  | 149.5  | 160.4  | 180.5  | 223.7  | 167.6  | 1.25 | 1.1E-01 |
| BFt29  | tRNA-Arg-ACG                                             | 128.0  | 146.2  | 221.2  | 181.9  | 177.1  | 462.8  | 1.53 | 3.7E-01 |
| BFt30  | tRNA-Arg-ACG                                             | 136.3  | 121.8  | 53.4   | 68.4   | 69.7   | 241.3  | 1.09 | 9.0E-01 |
| BFt31  | tRNA-Arg-ACG                                             | 0.0    | 0.0    | 0.0    | 0.0    | 0.0    | 0.0    |      |         |
| BF2490 | hypothetical protein                                     | 99.2   | 103.6  | 108.3  | 82.5   | 89.7   | 72.8   | 0.78 | 4.0E-02 |
| htpG   | heat shock protein 90                                    | 655.1  | 679.6  | 529.2  | 197.8  | 193.1  | 129.0  | 0.28 | 4.7E-03 |
| clpB   | negative regulator of genetic competence                 | 647.1  | 671.9  | 560.2  | 254.2  | 239.2  | 238.8  | 0.39 | 7.2E-04 |
| gyrA   | DNA gyrase A subunit                                     | 588.8  | 647.0  | 639.3  | 707.0  | 692.2  | 614.3  | 1.07 | 3.2E-01 |
| BF2494 | hypothetical protein                                     | 1932.8 | 1981.5 | 2293.4 | 2136.6 | 2239.1 | 1735.4 | 0.98 | 8.8E-01 |
| BF2495 | hypothetical protein                                     | 268.5  | 275.0  | 308.1  | 178.1  | 190.5  | 153.1  | 0.61 | 9.0E-03 |
| BF2496 | putative DNA-binding protein                             | 1026.5 | 985.2  | 987.2  | 1478.7 | 1645.8 | 1139.2 | 1.41 | 6.3E-02 |
| batE   | aerotolerance-related exported protein                   | 349.7  | 272.0  | 312.0  | 210.0  | 249.4  | 190.5  | 0.70 | 5.0E-02 |
| batD   | aerotolerance-related exported protein                   | 438.8  | 388.6  | 433.0  | 293.0  | 330.2  | 264.2  | 0.70 | 2.1E-02 |
| batC   | aerotolerance-related exported protein                   | 454.1  | 378.0  | 456.1  | 306.3  | 317.1  | 260.2  | 0.69 | 2.6E-02 |
| batB   | aerotolerance-related membrane protein                   | 405.4  | 345.2  | 390.3  | 239.0  | 262.6  | 235.1  | 0.65 | 6.1E-03 |
| batA   | aerotolerance-related membrane protein                   | 433.2  | 422.7  | 453.0  | 260.4  | 284.0  | 250.5  | 0.61 | 1.6E-03 |
| BF2502 | putative conserved membrane exported protein             | 392.7  | 414.7  | 434.7  | 281.7  | 305.1  | 250.4  | 0.67 | 9.9E-03 |
| BF2503 | hypothetical protein                                     | 579.9  | 530.9  | 611.5  | 472.3  | 494.5  | 407.2  | 0.80 | 5.9E-02 |
| BF2504 | putative magnesium chelatase                             | 648.4  | 612.1  | 640.3  | 563.2  | 615.7  | 472.8  | 0.86 | 1.9E-01 |
| BF2505 | hypothetical protein                                     | 236.9  | 200.5  | 227.2  | 180.3  | 202.9  | 180.7  | 0.85 | 9.8E-02 |
| hup2   | putative histone-like DNA-binding protein HU2            | 215.3  | 210.9  | 229.7  | 190.2  | 249.9  | 162.3  | 0.90 | 5.5E-01 |
| BF2507 | putative oxidoreductase                                  | 250.3  | 181.2  | 229.0  | 165.2  | 202.1  | 179.2  | 0.83 | 2.4E-01 |
| ftsY   | putative recognition particle-docking protein            | 223.0  | 160.1  | 199.8  | 134.3  | 156.4  | 158.9  | 0.78 | 1.3E-01 |
| rpmG   | 50S ribosomal protein L33                                | 2290.1 | 1901.7 | 2551.6 | 2778.4 | 2605.0 | 2419.1 | 1.16 | 2.5E-01 |
| rpmB   | 50S ribosomal protein L28                                | 1648.9 | 1385.7 | 1756.2 | 2099.8 | 2021.8 | 1967.1 | 1.28 | 5.2E-02 |
| BF2511 | putative competence-damage inducible                     | 123.1  | 87.5   | 108.3  | 76.0   | 87.8   | 89.9   | 0.80 | 1.7E-01 |
| BF2512 | putative glycoprotease                                   | 143.9  | 106.0  | 116.4  | 82.6   | 89.5   | 95.9   | 0.74 | 6.5E-02 |
| BF2513 | hypothetical protein                                     | 89.4   | 91.6   | 91.8   | 61.2   | 65.7   | 60.1   | 0.68 | 1.2E-03 |
| BF2514 | putative conserved hypothetical membrane protein         | 225.5  | 228.1  | 240.2  | 217.3  | 219.8  | 199.5  | 0.92 | 1.2E-01 |
| proS   | prolyl-tRNA synthetase                                   | 371.2  | 318.5  | 321.9  | 415.2  | 372.3  | 383.4  | 1.16 | 1.1E-01 |
| BF2516 | hypothetical protein                                     | 40.6   | 40.3   | 39.9   | 25.9   | 27.5   | 21.2   | 0.61 | 9.9E-03 |
| BF2517 | putative exported tricorn protease                       | 158.5  | 168.2  | 146.6  | 174.0  | 166.3  | 167.1  | 1.07 | 2.3E-01 |
| BFt32  | tRNA-Gly-CCC                                             | 7.0    | 12.3   | 5.1    | 15.4   | 13.4   | 33.4   | 2.51 | 1.2E-01 |
| cobP   | bifunctional cobalamin biosynthesis protein              | 35.0   | 35.1   | 36.7   | 47.7   | 40.1   | 42.4   | 1.22 | 4.0E-02 |

|           |                                                                |       |       |       |       |       |       |      |         |
|-----------|----------------------------------------------------------------|-------|-------|-------|-------|-------|-------|------|---------|
| BF2519    | putative phosphoribosyltransferase                             | 41.6  | 41.8  | 38.9  | 74.9  | 68.3  | 75.2  | 1.78 | 8.6E-04 |
| BF2520    | putative cobalamin 5'-phosphate synthase                       | 40.1  | 44.1  | 38.7  | 68.8  | 72.5  | 70.5  | 1.73 | 1.3E-03 |
| BF2521    | putative alpha-ribazole-5'-phosphate phosphatase               | 47.2  | 35.4  | 46.3  | 61.3  | 59.9  | 65.4  | 1.46 | 3.4E-02 |
| BF2522    | putative cobalamin biosynthesis protein                        | 58.8  | 53.3  | 54.4  | 64.7  | 49.7  | 79.3  | 1.14 | 4.6E-01 |
| BF2523    | putative histidinol-phosphate aminotransferase                 | 95.4  | 100.1 | 83.0  | 113.8 | 100.5 | 140.2 | 1.27 | 1.5E-01 |
| cbiP      | cobyric acid synthase                                          | 105.3 | 108.3 | 90.4  | 96.4  | 80.5  | 139.7 | 1.02 | 9.4E-01 |
| BF2525    | conserved hypothetical DNA-binding protein                     | 18.7  | 14.9  | 13.0  | 6.1   | 8.5   | 12.0  | 0.56 | 9.0E-02 |
| BF2526    | hypothetical protein                                           | 141.0 | 109.5 | 127.9 | 124.9 | 124.5 | 96.8  | 0.91 | 5.4E-01 |
| BF2527    | hypothetical plasmid-stabilisation protein                     | 80.6  | 74.7  | 74.4  | 65.0  | 95.8  | 63.2  | 0.96 | 8.1E-01 |
| BF2528    | putative outer membrane protein                                | 54.0  | 64.2  | 47.8  | 13.8  | 9.9   | 16.1  | 0.24 | 3.9E-03 |
| BF2529    | hypothetical protein                                           | 54.2  | 55.4  | 52.1  | 13.9  | 10.8  | 14.1  | 0.24 | 6.4E-04 |
| BF2530    | hypothetical protein                                           | 47.1  | 56.8  | 54.5  | 11.0  | 11.6  | 12.1  | 0.22 | 2.6E-04 |
| BF2531    | hypothetical protein                                           | 48.7  | 52.6  | 40.1  | 11.8  | 8.1   | 12.4  | 0.23 | 3.0E-03 |
| BF2532    | putative two-component system sensor histidine kinase          | 29.7  | 33.7  | 31.9  | 18.2  | 18.6  | 24.2  | 0.64 | 2.3E-02 |
| BF2533    | putative cobalamin adenosyltransferase                         | 38.3  | 38.8  | 41.5  | 49.1  | 44.3  | 61.7  | 1.30 | 9.8E-02 |
| cobB      | cobyric acid A,C-diamide synthase                              | 114.2 | 119.9 | 118.9 | 136.4 | 122.4 | 152.8 | 1.16 | 1.3E-01 |
| BF2535    | hypothetical protein                                           | 45.4  | 56.7  | 61.3  | 98.5  | 96.7  | 90.3  | 1.76 | 1.1E-02 |
| BF2536    | hypothetical protein                                           | 38.1  | 39.8  | 48.8  | 82.2  | 68.5  | 80.8  | 1.83 | 9.2E-03 |
| BF2537    | hypothetical protein                                           | 59.0  | 78.4  | 89.4  | 105.9 | 103.5 | 104.8 | 1.40 | 8.2E-02 |
| BF2538    | hypothetical protein                                           | 36.5  | 44.7  | 55.2  | 64.6  | 61.1  | 72.2  | 1.47 | 7.0E-02 |
| Cobalamin | RF00174                                                        | 180.9 | 210.5 | 140.2 | 136.1 | 101.2 | 240.7 | 0.85 | 6.6E-01 |
| Cobalamin | RF00174                                                        | 167.9 | 184.7 | 178.6 | 267.0 | 197.7 | 431.4 | 1.60 | 1.6E-01 |
| BF2539    | putative iron transport-related exported protein               | 67.2  | 90.1  | 106.2 | 277.1 | 223.2 | 244.9 | 2.87 | 6.5E-03 |
| BF2540    | putative cobalt chelatase                                      | 88.0  | 121.5 | 137.7 | 330.9 | 299.6 | 278.7 | 2.66 | 7.3E-03 |
| BF2541    | putative transport-related exported protein                    | 98.6  | 142.4 | 162.1 | 286.0 | 266.9 | 259.4 | 2.06 | 2.0E-02 |
| BF2542    | hypothetical protein                                           | 50.6  | 75.8  | 93.1  | 142.5 | 128.4 | 130.9 | 1.89 | 4.6E-02 |
| BF2543    | putative cobalamin biosynthesis-related membrane protein       | 21.5  | 31.3  | 35.4  | 57.1  | 52.2  | 53.1  | 1.88 | 2.9E-02 |
| BF2544    | hypothetical protein                                           | 10.7  | 13.0  | 20.1  | 28.9  | 32.8  | 27.5  | 2.10 | 3.6E-02 |
| BF2545    | putative transport-related membrane protein                    | 18.6  | 26.1  | 29.2  | 52.2  | 55.5  | 49.0  | 2.16 | 1.4E-02 |
| BF2546    | putative conserved membrane protein                            | 14.6  | 22.4  | 20.2  | 52.2  | 50.0  | 49.2  | 2.69 | 5.6E-03 |
| cobJ      | precoerriin-3B C17-methyltransferase                           | 74.8  | 79.5  | 77.2  | 87.1  | 87.1  | 92.7  | 1.15 | 1.6E-02 |
| BF2548    | putative bifunctional CbiE/CbiT cobalamin biosynthesis protein | 125.1 | 145.5 | 145.3 | 184.0 | 149.3 | 236.9 | 1.35 | 1.5E-01 |
| BF2549    | putative bifunctional CbiF/CbiG cobalamin biosynthesis protein | 44.5  | 53.2  | 48.5  | 56.5  | 53.5  | 58.4  | 1.15 | 1.1E-01 |
| BF2550    | putative bifunctional CbiD/CbiJ cobalamin biosynthesis protein | 52.5  | 53.9  | 50.9  | 53.1  | 52.8  | 57.5  | 1.04 | 3.8E-01 |
| BF2551    | putative lipoprotein                                           | 78.3  | 98.1  | 96.9  | 68.2  | 53.9  | 55.2  | 0.65 | 3.0E-02 |
| BF2552    | putative hexokinase                                            | 183.2 | 167.8 | 168.6 | 62.5  | 58.6  | 53.1  | 0.33 | 4.1E-04 |
| BF2553    | hypothetical protein                                           | 106.9 | 134.0 | 104.7 | 61.9  | 44.0  | 43.3  | 0.43 | 1.1E-02 |

|        |                                                       |        |        |        |        |        |        |      |         |
|--------|-------------------------------------------------------|--------|--------|--------|--------|--------|--------|------|---------|
| BFt33  | tRNA-Gly-GCC                                          | 0.0    | 0.0    | 0.0    | 0.0    | 0.0    | 0.0    |      |         |
| BFt34  | tRNA-Leu-CAG                                          | 1100.4 | 1518.4 | 1161.7 | 2020.0 | 1423.1 | 2442.5 | 1.54 | 1.3E-01 |
| BFt35  | tRNA-Gly-GCC                                          | 1513.7 | 1535.7 | 1292.6 | 2605.2 | 1997.2 | 3826.4 | 1.88 | 5.7E-02 |
| BFt36  | tRNA-Leu-GAG                                          | 497.8  | 681.5  | 557.5  | 862.1  | 775.8  | 1731.1 | 1.83 | 1.3E-01 |
| BFt37  | tRNA-Leu-CAG                                          | 628.8  | 404.9  | 335.6  | 754.1  | 672.7  | 2128.0 | 2.33 | 1.6E-01 |
| BFt38  | tRNA-Gly-GCC                                          | 0.0    | 0.0    | 0.0    | 0.0    | 0.0    | 0.0    |      |         |
| BF2554 | putative carboxynorspermidine decarboxylase           | 52.2   | 55.6   | 49.3   | 72.6   | 73.5   | 83.3   | 1.46 | 7.8E-03 |
| BF2555 | putative helicase                                     | 79.4   | 85.9   | 63.0   | 97.7   | 80.0   | 132.6  | 1.34 | 2.2E-01 |
| sodB   | superoxide dismutase [Fe]                             | 4746.9 | 5519.4 | 4446.6 | 2335.9 | 2048.5 | 2631.1 | 0.48 | 5.4E-03 |
| TPP    | RF00059                                               | 119.5  | 125.1  | 108.6  | 41.4   | 24.2   | 51.0   | 0.32 | 1.7E-02 |
| BF2557 | putative thiamine biosynthesis-related protein        | 94.5   | 79.6   | 63.8   | 16.9   | 17.5   | 29.1   | 0.26 | 8.8E-03 |
| thiE   | thiamine-phosphate pyrophosphorylase                  | 21.8   | 20.8   | 17.7   | 6.0    | 4.0    | 9.1    | 0.30 | 1.9E-02 |
| thiG   | thiazole synthase                                     | 19.3   | 20.5   | 17.3   | 14.9   | 8.9    | 17.6   | 0.70 | 2.2E-01 |
| thiC   | thiamine biosynthesis protein ThiC                    | 15.9   | 17.8   | 14.2   | 13.2   | 9.2    | 16.3   | 0.79 | 3.2E-01 |
| BF2561 | hypothetical protein                                  | 12.4   | 13.5   | 9.5    | 9.9    | 10.7   | 12.8   | 0.95 | 7.7E-01 |
| thiH   | thiamine biosynthesis protein ThiH                    | 14.1   | 14.5   | 13.6   | 14.3   | 12.0   | 14.4   | 0.96 | 6.2E-01 |
| BF2563 | putative molybdopterin biosynthesis-related protein   | 9.0    | 10.7   | 8.3    | 11.7   | 9.6    | 16.4   | 1.32 | 2.5E-01 |
| BF2564 | putative thiamine phosphate pyrophosphorylase         | 551.7  | 525.8  | 593.8  | 460.2  | 485.4  | 437.5  | 0.83 | 3.1E-02 |
| BF2565 | hypothetical protein                                  | 104.2  | 107.2  | 120.1  | 61.3   | 64.1   | 57.4   | 0.55 | 1.9E-03 |
| BF2566 | hypothetical protein                                  | 816.0  | 804.8  | 777.5  | 793.9  | 901.4  | 823.2  | 1.05 | 3.7E-01 |
| ppdK   | pyruvate phosphate dikinase                           | 203.4  | 225.1  | 217.5  | 732.6  | 719.5  | 839.3  | 3.54 | 3.1E-04 |
| BF2568 | putative RNA methyltransferase                        | 147.6  | 141.5  | 146.0  | 165.8  | 168.3  | 161.4  | 1.14 | 5.9E-03 |
| BF2569 | putative RNA pseudouridylate synthase                 | 189.9  | 226.3  | 200.4  | 219.7  | 200.7  | 210.0  | 1.02 | 7.5E-01 |
| BF2570 | putative lipoprotein                                  | 186.5  | 190.9  | 189.0  | 196.6  | 224.5  | 214.4  | 1.12 | 7.6E-02 |
| BF2571 | putative lipoprotein                                  | 232.0  | 198.9  | 203.7  | 219.5  | 240.0  | 247.5  | 1.12 | 2.0E-01 |
| BF2572 | hypothetical protein                                  | 2.4    | 3.8    | 1.3    | 4.6    | 5.6    | 2.3    | 1.69 | 3.4E-01 |
| BF2573 | hypothetical protein                                  | 1.3    | 2.1    | 6.6    | 7.0    | 8.5    | 5.1    | 2.53 | 1.9E-01 |
| BF2575 | hypothetical protein                                  | 3.9    | 4.5    | 2.9    | 6.0    | 6.1    | 6.8    | 1.69 | 3.5E-02 |
| BF2576 | putative aminopeptidase                               | 123.0  | 121.2  | 115.0  | 89.4   | 79.8   | 83.6   | 0.70 | 3.4E-03 |
| BF2577 | putative DNA recombination-related protein            | 70.9   | 71.6   | 68.4   | 67.2   | 59.9   | 63.2   | 0.90 | 7.4E-02 |
| BF2578 | hypothetical protein                                  | 53.4   | 59.7   | 46.5   | 46.8   | 49.2   | 45.5   | 0.89 | 2.6E-01 |
| BF2579 | putative Na <sup>+</sup> /H <sup>+</sup> antiporter   | 204.8  | 223.3  | 211.3  | 127.9  | 144.0  | 141.8  | 0.65 | 2.8E-03 |
| BF2580 | putative transport-related membrane protein           | 292.9  | 275.6  | 279.5  | 230.1  | 236.9  | 194.7  | 0.78 | 3.4E-02 |
| BF2581 | GTP-binding protein LepA                              | 265.0  | 278.7  | 259.1  | 274.4  | 257.3  | 288.6  | 1.02 | 6.8E-01 |
| BF2582 | hypothetical protein                                  | 2145.5 | 2487.6 | 2605.2 | 1348.7 | 1567.2 | 1896.6 | 0.66 | 4.2E-02 |
| BF2583 | hypothetical protein                                  | 94.9   | 84.8   | 85.2   | 96.0   | 86.1   | 116.9  | 1.12 | 3.7E-01 |
| BF2584 | hypothetical protein                                  | 150.3  | 140.2  | 132.8  | 127.8  | 138.7  | 154.5  | 0.99 | 9.3E-01 |
| exoA   | exodeoxyribonuclease                                  | 249.6  | 246.1  | 248.4  | 174.0  | 172.7  | 191.3  | 0.72 | 2.7E-03 |
| BF2586 | putative manganese transport-related membrane protein | 147.3  | 149.7  | 158.7  | 52.1   | 65.2   | 59.8   | 0.39 | 1.0E-03 |
| BF2587 | putative lipoprotein                                  | 236.2  | 269.8  | 273.9  | 183.0  | 181.4  | 151.6  | 0.66 | 1.5E-02 |
| BF2588 | hypothetical protein                                  | 571.0  | 587.5  | 578.2  | 594.8  | 563.9  | 611.7  | 1.02 | 5.7E-01 |
| BF2589 | hypothetical protein                                  | 632.6  | 564.1  | 643.7  | 734.9  | 730.0  | 733.3  | 1.20 | 2.7E-02 |

|        |                                                                          |        |        |        |        |        |        |      |         |
|--------|--------------------------------------------------------------------------|--------|--------|--------|--------|--------|--------|------|---------|
| pheT   | phenylalanyl-tRNA synthetase beta subunit                                | 348.5  | 337.7  | 348.1  | 358.6  | 377.7  | 367.4  | 1.07 | 4.3E-02 |
| BF2591 | putative LPS biosynthesis related glycosyltransferase                    | 13.7   | 13.6   | 14.3   | 8.4    | 7.9    | 7.6    | 0.58 | 6.0E-04 |
| BF2592 | putative LPS biosynthesis related DNTP hexose dehydratase-epimerase      | 13.8   | 14.5   | 13.0   | 6.9    | 9.8    | 6.0    | 0.54 | 2.9E-02 |
| BF2593 | putative LPS biosynthesis related glycosyltransferase                    | 16.4   | 15.6   | 16.2   | 8.4    | 8.5    | 7.2    | 0.50 | 1.4E-03 |
| BF2594 | putative LPS biosynthesis related glycosyltransferase                    | 13.4   | 13.3   | 13.1   | 6.3    | 6.6    | 6.4    | 0.48 | 4.1E-05 |
| BF2595 | putative LPS biosynthesis related glycosyltransferase                    | 12.2   | 13.3   | 12.9   | 5.5    | 11.0   | 5.6    | 0.54 | 9.1E-02 |
| BF2596 | putative LPS biosynthesis related polysaccharide polymerase              | 8.9    | 6.6    | 6.7    | 1.0    | 2.2    | 1.7    | 0.21 | 1.0E-02 |
| BF2597 | putative LPS biosynthesis related glycosyltransferase                    | 7.7    | 7.0    | 10.1   | 2.8    | 4.8    | 2.6    | 0.39 | 3.0E-02 |
| BF2598 | putative LPS biosynthesis related polysaccharide transporter/flippase    | 10.1   | 9.9    | 16.6   | 5.1    | 4.7    | 4.1    | 0.39 | 1.6E-02 |
| BF2599 | putative LPS biosynthesis related glycosyltransferase                    | 19.9   | 24.9   | 20.1   | 11.9   | 13.0   | 9.2    | 0.52 | 1.6E-02 |
| rfbE   | DNTP-hexose dehydratase-epimerase                                        | 26.8   | 27.4   | 27.2   | 13.0   | 16.6   | 14.4   | 0.54 | 4.0E-03 |
| BF2601 | putative LPS biosynthesis related DNTP hexose dehydratase-epimerase      | 29.5   | 28.0   | 31.0   | 11.3   | 14.2   | 13.9   | 0.44 | 2.4E-03 |
| BF2602 | putative LPS biosynthesis related DNTP hexose dehydratase-epimerase      | 26.3   | 21.5   | 25.7   | 14.1   | 14.8   | 13.6   | 0.58 | 4.6E-03 |
| BF2603 | putative LPS biosynthesis-related sugar-phosphate nucleotidyltransferase | 22.5   | 15.7   | 17.5   | 7.7    | 7.6    | 12.2   | 0.49 | 3.6E-02 |
| BF2604 | putative LPS biosynthesis related DNTP hexose dehydratase-epimerase      | 20.6   | 21.9   | 25.3   | 14.1   | 20.9   | 14.2   | 0.72 | 1.2E-01 |
| upeZ   | putative transcriptional regulatory protein                              | 19.0   | 19.0   | 19.7   | 11.8   | 12.7   | 13.0   | 0.65 | 1.1E-03 |
| upeY   | putative transcriptional regulatory protein                              | 43.5   | 41.6   | 40.1   | 17.1   | 21.3   | 15.7   | 0.43 | 3.5E-03 |
| BF2607 | hypothetical protein                                                     | 95.5   | 95.2   | 104.0  | 179.9  | 184.4  | 163.5  | 1.79 | 1.4E-03 |
| BF2608 | hypothetical protein                                                     | 105.9  | 98.4   | 107.2  | 153.0  | 173.3  | 147.7  | 1.52 | 5.6E-03 |
| BF2609 | putative DNA helicase                                                    | 106.6  | 108.8  | 105.6  | 113.0  | 120.0  | 119.3  | 1.10 | 2.4E-02 |
| BF2610 | putative terpenoid biosynthesis-related protein                          | 38.3   | 37.3   | 40.0   | 54.7   | 56.7   | 56.6   | 1.45 | 7.3E-04 |
| BF2611 | putative lipoprotein                                                     | 26.1   | 27.6   | 28.7   | 62.2   | 68.9   | 56.2   | 2.27 | 1.4E-03 |
| BF2612 | putative lipoprotein                                                     | 23.9   | 27.6   | 25.1   | 30.0   | 31.8   | 27.4   | 1.16 | 1.0E-01 |
| galE   | UDP-glucose 4-epimerase                                                  | 1022.6 | 1095.1 | 1187.4 | 1135.4 | 1246.7 | 1054.6 | 1.04 | 6.5E-01 |
| mfA    | electron transport complex protein RnfA                                  | 106.2  | 113.7  | 119.4  | 397.2  | 422.5  | 377.8  | 3.53 | 1.8E-04 |
| mfE    | NADH-ubiquinone oxidoreductase                                           | 54.6   | 71.2   | 68.1   | 237.8  | 256.1  | 213.6  | 3.66 | 1.1E-03 |
| mfG    | electron transport complex protein RnfG                                  | 46.7   | 60.6   | 64.5   | 201.0  | 230.6  | 208.2  | 3.75 | 1.4E-03 |
| mfD    | electron transport complex protein RnfD                                  | 48.9   | 55.4   | 62.8   | 205.3  | 232.1  | 196.7  | 3.81 | 8.0E-04 |
| mfC    | electron transport complex protein                                       | 52.1   | 54.3   | 59.7   | 231.1  | 242.0  | 239.5  | 4.30 | 9.1E-05 |
| BF2619 | ferredoxin                                                               | 31.9   | 46.7   | 46.7   | 193.1  | 184.2  | 214.3  | 4.78 | 1.7E-03 |



|        |                                                                               |        |        |        |        |        |        |      |         |
|--------|-------------------------------------------------------------------------------|--------|--------|--------|--------|--------|--------|------|---------|
| BF2620 | hypothetical protein                                                          | 75.2   | 87.6   | 96.2   | 117.1  | 110.4  | 134.2  | 1.40 | 4.1E-02 |
| BF2621 | hypothetical protein                                                          | 181.2  | 159.9  | 165.0  | 128.0  | 151.3  | 120.0  | 0.79 | 6.5E-02 |
| BF2622 | hypothetical protein                                                          | 626.3  | 632.8  | 674.8  | 631.6  | 637.9  | 564.6  | 0.95 | 3.7E-01 |
| BF2623 | hypothetical protein                                                          | 0.7    | 0.7    | 0.0    | 0.0    | 0.0    | 0.6    | 0.93 |         |
| pyrG   | CTP synthetase                                                                | 608.0  | 592.9  | 627.7  | 629.8  | 595.9  | 559.9  | 0.98 | 6.2E-01 |
| BF2625 | putative inner membrane protein translocase component YidC                    | 775.8  | 796.1  | 807.9  | 644.4  | 673.8  | 594.6  | 0.80 | 1.2E-02 |
| BF2626 | putative transpor-related membrane protein                                    | 29.7   | 35.8   | 38.2   | 27.0   | 28.4   | 23.5   | 0.76 | 7.6E-02 |
| BF2627 | putative exported aminopeptidase                                              | 200.5  | 197.1  | 182.9  | 241.5  | 221.3  | 237.7  | 1.21 | 2.0E-02 |
| BF2628 | hypothetical protein                                                          | 56.2   | 38.1   | 41.2   | 22.2   | 24.8   | 32.8   | 0.59 | 5.9E-02 |
| BF2629 | hypothetical protein                                                          | 77.3   | 92.1   | 79.3   | 72.5   | 62.0   | 70.4   | 0.82 | 9.0E-02 |
| BF2630 | putative PadR-family transcriptional regulatory protein                       | 27.8   | 17.9   | 18.5   | 20.9   | 15.2   | 20.7   | 0.89 | 6.2E-01 |
| BF2631 | putative acetyltransferase                                                    | 46.8   | 44.1   | 40.6   | 114.5  | 109.9  | 102.7  | 2.49 | 5.7E-04 |
| BF2632 | putative transport-related membrane protein                                   | 308.8  | 344.0  | 338.9  | 674.3  | 702.0  | 609.4  | 2.00 | 1.3E-03 |
| BF2633 | putative regulatory protein                                                   | 56.6   | 57.5   | 58.3   | 57.1   | 63.0   | 58.9   | 1.04 | 3.5E-01 |
| uvrA1  | UvrABC SOS-repair system protein excinuclease A                               | 178.6  | 169.0  | 178.0  | 170.5  | 163.5  | 168.4  | 0.96 | 1.6E-01 |
| BF2635 | conserved exported hypothetical protein                                       | 273.1  | 275.3  | 274.9  | 166.2  | 176.9  | 159.6  | 0.61 | 6.5E-04 |
| BF2636 | putative conserved exported protein                                           | 189.9  | 192.7  | 227.0  | 150.0  | 146.9  | 133.9  | 0.71 | 1.6E-02 |
| BF2637 | hypothetical protein                                                          | 308.6  | 266.5  | 329.0  | 246.0  | 285.6  | 259.6  | 0.88 | 2.2E-01 |
| BF2638 | hypothetical protein                                                          | 1319.2 | 1223.9 | 1433.0 | 1560.9 | 1569.3 | 1396.0 | 1.14 | 1.4E-01 |
| BF2639 | conserved hypothetical lipoprotein                                            | 918.9  | 917.2  | 1024.2 | 645.2  | 719.1  | 604.7  | 0.69 | 1.1E-02 |
| BF2640 | hypothetical protein                                                          | 129.2  | 119.0  | 138.7  | 362.0  | 408.6  | 331.0  | 2.84 | 1.0E-03 |
| paaK1  | putative phenylacetate-coenzyme A ligase                                      | 125.6  | 120.1  | 120.3  | 142.3  | 144.7  | 126.7  | 1.13 | 8.6E-02 |
| uvrB   | excinuclease ABC subunit B                                                    | 158.1  | 163.6  | 153.6  | 148.2  | 165.5  | 141.7  | 0.96 | 4.9E-01 |
| BF2643 | putative transport-related membrane protein                                   | 45.3   | 46.7   | 48.3   | 34.8   | 43.8   | 42.1   | 0.86 | 1.5E-01 |
| BF2644 | hypothetical protein                                                          | 20.7   | 17.6   | 16.0   | 21.1   | 20.0   | 18.1   | 1.09 | 4.4E-01 |
| BF2646 | putative heat-shock related protein                                           | 1044.7 | 1187.8 | 803.5  | 88.5   | 76.2   | 71.8   | 0.08 | 4.2E-04 |
| BF2647 | putative two-component system sensor kinase/response regulator fusion protein | 40.1   | 34.0   | 38.1   | 26.1   | 25.4   | 25.8   | 0.69 | 5.7E-03 |
| BF2648 | putative ABC transport system, membrane protein                               | 20.3   | 19.3   | 24.1   | 17.5   | 17.9   | 15.7   | 0.80 | 8.1E-02 |
| BF2649 | putative ABC transport system, membrane protein                               | 22.1   | 28.3   | 30.2   | 19.4   | 17.4   | 17.8   | 0.68 | 3.7E-02 |
| BF2650 | putative BAC transport system, two-fused ATP-binding domains protein          | 36.4   | 38.4   | 32.5   | 32.2   | 30.2   | 35.1   | 0.91 | 2.9E-01 |
| BF2651 | putative ABC transport system, lipoprotein                                    | 37.8   | 33.5   | 36.4   | 35.8   | 28.9   | 37.4   | 0.94 | 6.1E-01 |
| BF2652 | hypothetical protein                                                          | 28.2   | 31.5   | 28.6   | 39.5   | 33.3   | 46.1   | 1.34 | 7.3E-02 |
| BF2654 | conserved hypothetical lipoprotein                                            | 45.7   | 45.6   | 48.7   | 210.3  | 224.7  | 197.0  | 4.51 | 8.9E-05 |
| BF2655 | putative AraC-family transcriptional regulator                                | 15.7   | 15.0   | 16.4   | 21.8   | 19.8   | 20.2   | 1.31 | 7.3E-03 |
| BF2656 | putative thioredoxin                                                          | 730.2  | 744.4  | 618.2  | 198.2  | 190.5  | 196.6  | 0.28 | 3.5E-04 |

|           |                                                              |        |        |        |        |        |        |      |         |
|-----------|--------------------------------------------------------------|--------|--------|--------|--------|--------|--------|------|---------|
| carB1     | putative carbamoyl-phosphate synthase large chain 1          | 471.4  | 544.1  | 420.5  | 251.2  | 216.3  | 286.2  | 0.52 | 1.1E-02 |
| carA      | carbamoyl-phosphate synthase small subunit                   | 199.4  | 188.9  | 163.3  | 89.8   | 79.5   | 116.6  | 0.51 | 1.6E-02 |
| BF2659    | putative phosphoribosylpyrophosphate amidotransferase        | 212.1  | 178.3  | 151.2  | 83.4   | 76.8   | 119.4  | 0.51 | 3.2E-02 |
| asnB      | asparagine synthetase B                                      | 39.0   | 42.0   | 36.8   | 8.2    | 6.7    | 10.8   | 0.21 | 2.1E-03 |
| BF2662    | hypothetical protein                                         | 121.6  | 119.0  | 115.3  | 154.7  | 172.4  | 166.8  | 1.39 | 3.3E-03 |
| BF2663    | hypothetical protein                                         | 9.5    | 7.7    | 7.1    | 4.5    | 7.6    | 6.6    | 0.75 | 2.6E-01 |
| BF2664    | hypothetical protein                                         | 9.9    | 8.4    | 9.8    | 21.0   | 17.7   | 18.4   | 2.04 | 2.9E-03 |
| dapF      | diaminopimelate epimerase                                    | 331.1  | 319.0  | 275.4  | 76.0   | 55.1   | 102.9  | 0.25 | 5.8E-03 |
| BF2666    | aspartate aminotransferase                                   | 230.1  | 247.4  | 212.4  | 126.7  | 108.2  | 138.3  | 0.54 | 6.0E-03 |
| BF2667    | hypothetical protein                                         | 504.8  | 608.1  | 500.7  | 531.8  | 524.6  | 656.5  | 1.06 | 6.4E-01 |
| BF2668    | polyphosphate kinase                                         | 9.3    | 11.4   | 9.9    | 3.9    | 3.4    | 4.4    | 0.38 | 2.9E-03 |
| BF2669    | putative phosphatase                                         | 57.9   | 54.2   | 58.2   | 23.9   | 28.4   | 31.8   | 0.49 | 4.4E-03 |
| BF2670    | putative alcohol dehydrogenase                               | 609.7  | 618.6  | 587.5  | 374.3  | 324.1  | 376.8  | 0.59 | 2.4E-03 |
| trpB      | tryptophan synthase subunit beta                             | 152.1  | 181.9  | 179.2  | 100.9  | 90.0   | 103.6  | 0.57 | 5.3E-03 |
| trpE      | anthranilate synthase component I                            | 130.9  | 211.3  | 200.2  | 57.4   | 61.3   | 62.6   | 0.34 | 6.9E-03 |
| trpG      | glutamine amidotransferase                                   | 117.1  | 191.7  | 168.3  | 45.0   | 51.2   | 48.3   | 0.31 | 5.3E-03 |
| trpD      | anthranilate phosphoribosyltransferase                       | 149.3  | 208.2  | 190.4  | 52.4   | 58.9   | 61.0   | 0.32 | 2.2E-03 |
| trpC      | indole-3-glycerol phosphate synthase                         | 168.6  | 222.5  | 225.8  | 57.2   | 48.0   | 54.8   | 0.26 | 1.4E-03 |
| trpF      | N-(5'-phosphoribosyl)anthranilate isomerase                  | 116.2  | 171.1  | 160.5  | 44.4   | 51.6   | 36.0   | 0.30 | 5.4E-03 |
| trpA      | tryptophan synthase alpha chain                              | 164.4  | 210.2  | 235.3  | 58.7   | 58.0   | 52.8   | 0.28 | 1.8E-03 |
| ansA      | putative L-asparaginase I                                    | 23.3   | 30.8   | 28.4   | 25.1   | 21.7   | 21.8   | 0.84 | 1.9E-01 |
| BF2681    | hypothetical protein                                         | 7.3    | 6.0    | 6.6    | 2.3    | 2.0    | 2.9    | 0.36 | 4.5E-03 |
| BF2682    | putative response regulator                                  | 103.7  | 94.4   | 101.9  | 52.1   | 53.0   | 48.1   | 0.51 | 6.9E-04 |
| BF2683    | putative sugar transferase-related membrane protein          | 15.4   | 14.7   | 14.9   | 9.8    | 11.4   | 9.8    | 0.69 | 7.0E-03 |
| BF2684    | hypothetical protein                                         | 7.3    | 6.3    | 7.6    | 4.3    | 3.2    | 4.0    | 0.54 | 1.2E-02 |
| BF2685    | putative acetyltransferase                                   | 14.3   | 14.3   | 11.4   | 9.0    | 9.7    | 7.3    | 0.65 | 3.9E-02 |
| BF2686    | putative DNA-binding response regulator                      | 450.8  | 388.0  | 422.4  | 425.1  | 438.4  | 428.1  | 1.03 | 6.6E-01 |
| BF2687    | hypothetical protein                                         | 780.6  | 731.1  | 781.6  | 720.4  | 707.8  | 729.2  | 0.94 | 9.9E-02 |
| BF2688    | 5-aminoimidazole-4-carboxamide ribonucleotide transformylase | 29.4   | 28.1   | 23.5   | 40.0   | 35.6   | 40.2   | 1.43 | 2.3E-02 |
| fldA      | flavodoxin                                                   | 3314.5 | 2981.3 | 3277.6 | 6226.8 | 5444.1 | 6157.7 | 1.86 | 1.8E-03 |
| BF2690    | hypothetical protein                                         | 3595.6 | 3401.7 | 3952.4 | 5615.1 | 5398.8 | 4694.1 | 1.43 | 1.6E-02 |
| BF2692    | hypothetical membrane protein                                | 139.7  | 176.4  | 174.5  | 53.4   | 54.9   | 58.8   | 0.34 | 1.2E-03 |
| BF2693    | hypothetical protein                                         | 114.2  | 124.4  | 120.9  | 42.2   | 35.9   | 37.3   | 0.32 | 3.6E-04 |
| BF2694    | putative exported thioredoxin                                | 206.2  | 212.4  | 205.9  | 97.0   | 93.3   | 97.5   | 0.46 | 3.7E-05 |
| BF2695    | putative exported methylamine utilization protein            | 50.2   | 62.2   | 58.8   | 82.9   | 72.9   | 82.4   | 1.39 | 2.6E-02 |
| BF2696    | hypothetical protein                                         | 172.8  | 216.5  | 199.3  | 149.1  | 144.5  | 197.8  | 0.83 | 2.6E-01 |
| Cobalamin | RF00174                                                      | 279.9  | 335.7  | 192.4  | 237.2  | 146.3  | 430.5  | 0.94 | 9.0E-01 |
| BF2697    | putative exported TonB-dependent receptor protein            | 988.3  | 1015.1 | 924.3  | 665.6  | 586.8  | 648.2  | 0.65 | 3.3E-03 |
| BF2698    | hypothetical protein                                         | 1641.8 | 1494.4 | 1396.7 | 733.9  | 792.9  | 818.9  | 0.52 | 1.7E-03 |
| BF2699    | hypothetical protein                                         | 48.9   | 50.2   | 48.7   | 60.8   | 54.7   | 58.4   | 1.18 | 1.8E-02 |
| BF2700    | hypothetical protein                                         | 54.9   | 67.3   | 59.4   | 13.1   | 13.2   | 15.6   | 0.23 | 5.4E-04 |
| BF2701    | hypothetical protein                                         | 88.6   | 95.6   | 87.6   | 22.6   | 19.2   | 26.1   | 0.25 | 8.3E-04 |

|           |                                                                                 |        |        |        |        |        |        |      |         |
|-----------|---------------------------------------------------------------------------------|--------|--------|--------|--------|--------|--------|------|---------|
| BF2702    | hypothetical protein                                                            | 146.2  | 152.7  | 147.0  | 233.1  | 202.2  | 255.7  | 1.54 | 9.6E-03 |
| BF2703    | putative metal transport-related membrane protein                               | 254.1  | 274.2  | 256.5  | 224.3  | 223.6  | 242.6  | 0.88 | 4.4E-02 |
| BF2704    | hypothetical protein                                                            | 139.8  | 163.1  | 143.5  | 238.4  | 230.0  | 232.6  | 1.57 | 3.2E-03 |
| BF2705    | hypothetical protein                                                            | 0.0    | 0.0    | 0.0    | 1.2    | 1.4    | 0.0    |      |         |
| BF2706    | putative lipoprotein                                                            | 816.2  | 721.7  | 844.3  | 1855.3 | 1835.5 | 1464.9 | 2.16 | 4.1E-03 |
| BF2707    | putative lipoprotein                                                            | 372.1  | 372.6  | 385.4  | 758.0  | 715.9  | 700.8  | 1.92 | 2.2E-04 |
| BF2708    | putative exported TonB-dependent receptor protein                               | 209.0  | 198.7  | 189.9  | 417.7  | 387.1  | 381.2  | 1.98 | 5.8E-04 |
| BF2709    | putative cobalamin biosynthesis-related protein                                 | 281.8  | 279.4  | 240.4  | 426.3  | 381.4  | 467.2  | 1.59 | 1.1E-02 |
| BF2710    | hypothetical protein                                                            | 197.6  | 221.4  | 207.1  | 340.1  | 320.2  | 359.8  | 1.63 | 2.3E-03 |
| BF2711    | hypothetical protein                                                            | 366.7  | 352.3  | 354.8  | 499.5  | 447.9  | 433.2  | 1.28 | 1.3E-02 |
| BF2712    | hypothetical protein                                                            | 420.9  | 411.0  | 404.6  | 581.5  | 537.3  | 501.6  | 1.31 | 1.0E-02 |
| Cobalamin | RF00174                                                                         | 86.8   | 89.4   | 77.5   | 132.3  | 96.2   | 161.4  | 1.51 | 9.4E-02 |
| BF2713    | ribonucleotide-diphosphate reductase alpha subunit                              | 91.0   | 88.3   | 96.2   | 120.1  | 105.2  | 125.5  | 1.27 | 3.1E-02 |
| BF2714    | ribonucleotide-diphosphate reductase beta subunit                               | 68.7   | 79.4   | 88.1   | 119.0  | 103.9  | 124.1  | 1.47 | 2.7E-02 |
| BF2715    | hypothetical protein                                                            | 104.2  | 95.0   | 92.1   | 27.5   | 27.1   | 34.0   | 0.30 | 9.0E-04 |
| BF2716    | hypothetical protein                                                            | 140.2  | 161.5  | 146.9  | 50.8   | 49.1   | 53.6   | 0.34 | 3.2E-04 |
| BF2717    | hypothetical protein                                                            | 170.7  | 195.2  | 169.1  | 50.0   | 50.2   | 46.8   | 0.28 | 2.2E-04 |
| BF2718    | keto-hydroxyglutarate-aldolase/keto-deoxy- phosphogluconate aldolase            | 34.0   | 35.9   | 38.0   | 24.2   | 27.8   | 44.5   | 0.86 | 5.5E-01 |
| BF2719    | putative kinase                                                                 | 37.8   | 28.2   | 32.2   | 12.7   | 13.7   | 18.1   | 0.45 | 1.2E-02 |
| BF2720    | putative LacI-family transcriptional regulator                                  | 119.0  | 122.3  | 125.3  | 103.3  | 104.4  | 101.6  | 0.84 | 2.6E-03 |
| BF2721    | putative acetyltransferase                                                      | 54.5   | 51.6   | 39.6   | 49.0   | 50.3   | 47.7   | 1.02 | 8.9E-01 |
| BF2722    | putative regulatory protein                                                     | 27.2   | 21.6   | 20.1   | 27.6   | 22.3   | 37.9   | 1.26 | 3.4E-01 |
| BF2723    | putative two-component system histidine kinase/reponse regulator fusion protein | 10.9   | 10.3   | 10.4   | 5.2    | 4.0    | 5.2    | 0.45 | 3.5E-03 |
| BF2724    | hypothetical protein                                                            | 11.7   | 11.5   | 12.2   | 5.1    | 4.0    | 6.1    | 0.42 | 6.5E-03 |
| BF2725    | hypothetical protein                                                            | 17.5   | 14.7   | 13.3   | 7.0    | 8.6    | 6.2    | 0.48 | 1.1E-02 |
| BF2726    | putative peptide chain release factor                                           | 14.8   | 13.3   | 13.1   | 5.7    | 3.6    | 4.6    | 0.33 | 4.5E-03 |
| BF2727    | hypothetical protein                                                            | 15.0   | 16.2   | 16.1   | 6.3    | 7.0    | 6.4    | 0.42 | 3.3E-04 |
| BF2728    | putative cation antiporter                                                      | 32.3   | 33.3   | 35.7   | 29.7   | 23.7   | 25.2   | 0.77 | 4.6E-02 |
| BF2729    | hypothetical protein                                                            | 21.3   | 24.0   | 20.4   | 21.6   | 22.4   | 25.3   | 1.05 | 5.4E-01 |
| BF2730    | hypothetical protein                                                            | 1.0    | 1.0    | 1.1    | 1.8    | 1.1    | 1.4    | 1.39 | 1.3E-01 |
| rpsP      | 30S ribosomal protein S16                                                       | 2565.0 | 2976.9 | 2798.9 | 2891.7 | 2809.5 | 3510.5 | 1.10 | 3.8E-01 |
| BF2732    | hypothetical protein                                                            | 18.7   | 15.2   | 19.6   | 22.8   | 18.1   | 23.9   | 1.21 | 2.4E-01 |
| BF2733    | putative lipoprotein                                                            | 20.1   | 23.2   | 23.4   | 23.0   | 20.8   | 23.6   | 1.01 | 9.1E-01 |
| BF2734    | putative RNA-binding protein                                                    | 8002.5 | 8313.2 | 7183.4 | 2550.2 | 2471.4 | 2930.0 | 0.34 | 7.2E-04 |
| BF2735    | putative ABC transport system, lipoprotein                                      | 55.8   | 54.3   | 48.1   | 47.1   | 38.8   | 52.1   | 0.87 | 2.9E-01 |
| BF2736    | putative ABC transport system, membrane protein                                 | 47.6   | 48.5   | 52.2   | 54.3   | 51.8   | 50.2   | 1.05 | 2.9E-01 |
| BF2737    | putative ABC transport system, membrane protein                                 | 68.5   | 59.5   | 68.2   | 64.3   | 56.1   | 58.3   | 0.91 | 2.7E-01 |
| BF2738    | putative ABC transport system, ATP-binding protein                              | 110.6  | 92.2   | 93.5   | 78.7   | 60.6   | 88.3   | 0.76 | 1.4E-01 |

|               |                                                                   |         |         |         |         |         |          |      |         |
|---------------|-------------------------------------------------------------------|---------|---------|---------|---------|---------|----------|------|---------|
| BF2739        | putative lipoprotein/thioderoxin                                  | 534.5   | 521.6   | 512.3   | 522.6   | 486.3   | 449.0    | 0.93 | 2.4E-01 |
| BF2740        | hypothetical protein                                              | 113.3   | 124.3   | 118.2   | 158.5   | 158.8   | 162.5    | 1.35 | 2.1E-03 |
| BF2741        | putative glycogen phosphorylase                                   | 564.1   | 579.0   | 548.5   | 852.3   | 828.9   | 834.3    | 1.49 | 3.0E-04 |
| BF2742        | putative glycogen biosynthesis-related protein                    | 241.3   | 221.8   | 230.3   | 301.6   | 291.4   | 304.4    | 1.29 | 3.2E-03 |
| BF2743        | putative V(vacuolar)-type Na+-ATP synthase subunit K              | 607.3   | 686.6   | 642.2   | 1130.5  | 1213.8  | 1176.5   | 1.82 | 9.0E-04 |
| BF2744        | putative V(vacuolar)-type Na+ ATP synthase subunit I              | 348.1   | 351.0   | 313.4   | 497.4   | 486.2   | 518.3    | 1.48 | 2.9E-03 |
| BF2745        | V-type ATP synthase subunit D                                     | 392.2   | 340.7   | 312.3   | 487.4   | 458.8   | 450.6    | 1.34 | 2.9E-02 |
| BF2746        | V-type ATP synthase subunit B                                     | 350.0   | 375.8   | 342.2   | 527.0   | 515.2   | 566.1    | 1.51 | 2.4E-03 |
| BF2747        | V-type ATP synthase subunit A                                     | 246.8   | 233.4   | 220.5   | 383.1   | 396.5   | 440.9    | 1.74 | 2.3E-03 |
| BF2748        | hypothetical protein                                              | 177.1   | 157.3   | 191.1   | 349.0   | 428.0   | 371.0    | 2.18 | 3.0E-03 |
| BF2749        | putative V-type ATP synthase subunit E                            | 292.0   | 267.1   | 319.2   | 562.5   | 684.8   | 599.5    | 2.10 | 2.9E-03 |
| 5S            |                                                                   | 0.4     | 8.6     | 41.3    | 2.2     | 5.2     | 27.2     | 1.31 | 9.0E-01 |
| 23S           |                                                                   | 3.0     | 2.1     | 2.4     | 6.8     | 2.2     | 10.0     | 2.15 | 2.3E-01 |
| BFt39         | tRNA-Ala-TGC                                                      | 87.0    | 97.6    | 97.6    | 47.1    | 45.1    | 95.3     | 0.62 | 1.8E-01 |
| BFt40         | tRNA-Ile-GAT                                                      | 158.9   | 177.9   | 180.8   | 63.0    | 65.0    | 113.6    | 0.45 | 3.1E-02 |
| 16S           |                                                                   | 672.5   | 32.3    | 99.0    | 90.9    | 32.3    | 230.2    | 0.68 | 7.8E-01 |
| BF2751        | hypothetical protein                                              | 2.2     | 0.4     | 0.8     | 0.0     | 0.0     | 0.7      | 0.80 |         |
| BF2752        | putative N-acetylglucosamine-6-phosphate deacetylase              | 111.8   | 111.4   | 99.5    | 148.8   | 141.3   | 148.4    | 1.36 | 6.0E-03 |
| BF2753        | putative two component system response regulator                  | 30.2    | 26.9    | 19.5    | 52.3    | 44.3    | 55.2     | 2.01 | 2.0E-02 |
| BF2754        | putative two component system histidine kinase                    | 29.3    | 26.7    | 25.3    | 48.7    | 48.0    | 52.3     | 1.83 | 1.6E-03 |
| BF2755        | hypothetical protein                                              | 209.5   | 216.0   | 200.1   | 217.3   | 221.1   | 207.2    | 1.03 | 4.2E-01 |
| BF2756        | putative lipoprotein                                              | 362.4   | 309.7   | 320.1   | 352.9   | 336.3   | 313.1    | 1.01 | 8.9E-01 |
| BF2757        | putative peptidase                                                | 370.0   | 427.9   | 402.4   | 189.8   | 181.2   | 197.7    | 0.47 | 8.0E-04 |
| BF2758        | conserved exported hypothetical protein                           | 347.6   | 315.1   | 330.1   | 436.0   | 400.4   | 367.6    | 1.21 | 5.1E-02 |
| sigA          | putative sigma factor A                                           | 1801.0  | 1857.3  | 1757.5  | 1836.3  | 1678.7  | 1654.2   | 0.95 | 3.3E-01 |
| BF2760        | hypothetical protein                                              | 415.3   | 460.5   | 378.2   | 477.7   | 436.5   | 554.7    | 1.17 | 2.1E-01 |
| BF2761        | putative heat shock-related protease                              | 491.6   | 552.2   | 373.7   | 354.5   | 278.5   | 419.0    | 0.74 | 2.0E-01 |
| BF2762        | putative lipoprotein                                              | 84.9    | 83.8    | 68.7    | 191.4   | 162.1   | 215.1    | 2.39 | 4.6E-03 |
| BF2763        | putative muconate cycloisomerase                                  | 64.7    | 61.3    | 53.1    | 156.1   | 125.5   | 183.3    | 2.57 | 5.5E-03 |
| BF2764        | putative peptidase                                                | 130.7   | 123.3   | 111.9   | 278.9   | 256.4   | 284.0    | 2.24 | 8.8E-04 |
| RNaseP_bact_a | RF00010                                                           | 38110.9 | 37301.0 | 24749.4 | 50496.3 | 23941.3 | 107440.2 | 1.55 | 4.6E-01 |
| BF2765        | putative tRNA processing ribonuclease                             | 369.9   | 374.1   | 351.7   | 176.7   | 184.5   | 201.0    | 0.51 | 7.3E-04 |
| BF2766        | putative nitroreductase                                           | 212.7   | 208.2   | 192.1   | 245.0   | 186.5   | 310.3    | 1.19 | 3.9E-01 |
| ribE          | riboflavin synthase subunit alpha                                 | 156.8   | 149.1   | 122.1   | 228.8   | 186.0   | 273.7    | 1.60 | 4.7E-02 |
| BF2768        | putative phosphate transport chemotaxis-related protein           | 16.4    | 18.5    | 16.1    | 30.8    | 26.4    | 28.9     | 1.69 | 4.4E-03 |
| pstB          | phosphate import ATP-binding protein                              | 1.6     | 1.5     | 1.3     | 1.1     | 1.3     | 1.1      | 0.81 | 1.4E-01 |
| pstA          | phosphate transport system permease protein                       | 1.0     | 1.3     | 0.9     | 0.4     | 0.0     | 1.9      | 0.82 | 8.6E-01 |
| BF2771        | putative phosphate-related ABC transport system, membrane protein | 0.6     | 0.3     | 0.3     | 0.0     | 0.0     | 0.0      |      |         |
| BF2772        | putative phosphate-related ABC transport system, exported protein | 0.4     | 0.4     | 0.7     | 0.4     | 0.2     | 0.2      | 0.53 | 1.1E-01 |
| glnS          | glutaminyl-tRNA synthetase                                        | 222.3   | 224.5   | 191.3   | 226.2   | 197.3   | 248.3    | 1.05 | 6.5E-01 |

|        |                                                 |        |        |        |        |        |        |      |         |
|--------|-------------------------------------------------|--------|--------|--------|--------|--------|--------|------|---------|
| BF2774 | hypothetical protein                            | 101.8  | 101.9  | 86.3   | 112.5  | 97.4   | 119.4  | 1.14 | 2.6E-01 |
| BF2775 | hypothetical protein                            | 110.5  | 105.0  | 103.2  | 160.7  | 141.3  | 143.2  | 1.40 | 6.2E-03 |
| BF2776 | hypothetical protein                            | 249.5  | 284.9  | 249.6  | 285.0  | 298.5  | 314.2  | 1.15 | 9.5E-02 |
| tpx    | putative thiol peroxidase                       | 2542.9 | 3010.9 | 2238.5 | 1306.9 | 1085.5 | 1820.5 | 0.53 | 4.2E-02 |
| BF2778 | hypothetical protein                            | 296.5  | 368.3  | 291.8  | 83.6   | 76.5   | 84.3   | 0.26 | 6.2E-04 |
| mpi    | multiple promoter invertase                     | 8.9    | 10.7   | 6.9    | 2.5    | 2.8    | 1.4    | 0.25 | 1.2E-02 |
| BF2780 | putative recombinase/integrase                  | 3.6    | 2.8    | 2.4    | 1.2    | 1.4    | 1.0    | 0.42 | 1.2E-02 |
| BF2782 | putative EPS related membrane protein           | 1.4    | 0.8    | 0.4    | 0.4    | 0.4    | 0.8    | 0.66 | 4.6E-01 |
| BF2783 | putative EPS related membrane protein           | 0.4    | 0.0    | 0.2    | 0.2    | 0.5    | 0.6    | 1.25 | 7.2E-01 |
| BF2784 | putative EPS related membrane protein           | 0.4    | 0.5    | 0.6    | 0.7    | 0.3    | 0.8    | 1.18 | 6.8E-01 |
| BF2785 | putative N-acetylmuramoyl-L-alanine amidase     | 0.0    | 1.3    | 2.6    | 2.2    | 1.4    | 0.4    | 0.58 | 5.3E-01 |
| BF2786 | hypothetical protein                            | 0.8    | 0.0    | 0.0    | 0.0    | 0.0    | 0.0    |      |         |
| BF2787 | hypothetical protein                            | 0.7    | 0.8    | 0.0    | 1.3    | 0.0    | 1.4    | 1.85 | 7.8E-03 |
| BF2788 | hypothetical protein                            | 0.0    | 0.0    | 0.0    | 0.0    | 0.0    | 0.0    |      |         |
| BF2789 | hypothetical protein                            | 0.3    | 0.3    | 0.2    | 0.1    | 0.1    | 0.3    | 0.42 | 1.8E-01 |
| BF2790 | putative transcriptional regulator (pseudogene) | 1.7    | 1.1    | 0.4    | 0.0    | 0.4    | 0.3    | 0.41 | 2.0E-01 |
| BF2791 | putative transmembrane protein                  | 4.3    | 2.4    | 4.7    | 1.1    | 0.5    | 1.2    | 0.24 | 2.7E-02 |
| BF2792 | putative transmembrane protein                  | 1.5    | 0.9    | 1.1    | 0.5    | 0.8    | 0.5    | 0.49 | 5.8E-02 |
| BF2793 | hypothetical protein                            | 1.8    | 1.3    | 0.8    | 0.8    | 0.4    | 0.5    | 0.46 | 1.1E-01 |
| BF2794 | hypothetical protein                            | 2.4    | 1.5    | 1.6    | 0.3    | 1.3    | 0.5    | 0.31 | 1.0E-01 |
| BF2795 | putative glycosyltransferase protein            | 1.0    | 1.2    | 1.1    | 0.6    | 0.6    | 0.2    | 0.35 | 1.2E-01 |
| BF2796 | putative glycosyltransferase                    | 0.7    | 1.5    | 0.8    | 0.5    | 0.2    | 0.9    | 0.47 | 2.5E-01 |
| BF2797 | putative glycosyltransferase                    | 1.2    | 2.1    | 1.8    | 1.2    | 1.2    | 0.5    | 0.55 | 1.9E-01 |
| BF2798 | putative acetyltransferase                      | 1.3    | 1.7    | 1.4    | 0.0    | 0.0    | 1.2    | 0.84 |         |
| BF2799 | possible glycosyltransferase                    | 1.0    | 1.3    | 1.7    | 1.0    | 0.2    | 0.8    | 0.41 | 2.3E-01 |
| BF2800 | putative transmembrane protein                  | 0.6    | 1.3    | 0.7    | 0.7    | 0.4    | 0.6    | 0.65 | 3.2E-01 |
| BF2801 | putative glycosyltransferase protein            | 0.9    | 1.1    | 0.4    | 0.3    | 0.4    | 0.2    | 0.39 | 1.3E-01 |
| BF2802 | putative acyltransferase transmembrane protein  | 1.4    | 1.7    | 1.0    | 0.5    | 0.8    | 0.3    | 0.39 | 6.2E-02 |
| BF2803 | putative acetyltransferase                      | 1.9    | 1.3    | 2.4    | 0.3    | 0.4    | 0.6    | 0.22 | 1.3E-02 |
| BF2804 | putative glycosyltransferase                    | 1.2    | 1.1    | 1.5    | 1.3    | 1.6    | 1.0    | 1.01 | 9.7E-01 |
| BF2805 | putative 4Fe-4S binding protein                 | 2.1    | 1.6    | 2.7    | 1.3    | 0.8    | 1.9    | 0.60 | 2.0E-01 |
| BF2806 | hypothetical protein                            | 2.0    | 1.9    | 1.3    | 2.3    | 1.8    | 1.6    | 1.08 | 7.2E-01 |
| BF2807 | putative glycosyltransferase protein            | 0.9    | 1.1    | 0.5    | 0.8    | 1.2    | 0.8    | 1.22 | 5.8E-01 |
| BF2808 | putative acetyltransferase/glucosyltransferase  | 3.7    | 5.0    | 3.5    | 0.7    | 1.4    | 0.7    | 0.22 | 1.2E-02 |
| BF2809 | hypothetical protein                            | 2.0    | 2.4    | 1.7    | 0.9    | 0.3    | 1.0    | 0.32 | 8.3E-02 |
| BF2810 | hypothetical protein                            | 1.6    | 1.4    | 2.0    | 0.4    | 0.2    | 1.1    | 0.26 | 1.1E-01 |
| BF2811 | hypothetical protein                            | 1.9    | 1.0    | 1.8    | 1.3    | 1.4    | 1.2    | 0.85 | 5.6E-01 |
| BF2812 | hypothetical protein                            | 3.7    | 1.6    | 2.7    | 1.5    | 2.1    | 1.5    | 0.65 | 2.5E-01 |
| BF2813 | putative transmembrane protein                  | 1.0    | 1.8    | 1.1    | 0.7    | 1.6    | 1.3    | 0.86 | 7.2E-01 |
| BF2814 | hypothetical protein                            | 1.3    | 1.1    | 1.2    | 0.5    | 0.3    | 1.0    | 0.45 | 1.3E-01 |
| BF2815 | hypothetical protein                            | 1.0    | 0.9    | 0.7    | 0.8    | 0.7    | 0.0    | 0.90 | 4.1E-01 |
| BF2816 | hypothetical protein                            | 2.9    | 3.9    | 2.3    | 1.2    | 1.0    | 0.4    | 0.26 | 4.1E-02 |
| BF2817 | putative nucleotidyltransferase                 | 32.1   | 31.8   | 34.4   | 9.9    | 7.0    | 9.8    | 0.27 | 1.8E-03 |
| BF2818 | hypothetical protein                            | 4.5    | 11.6   | 7.0    | 12.0   | 13.6   | 16.5   | 1.95 | 1.2E-01 |

|        |                                                                   |       |       |       |       |       |       |      |         |
|--------|-------------------------------------------------------------------|-------|-------|-------|-------|-------|-------|------|---------|
| BF2819 | putative Na <sup>+</sup> transport decarboxylase membrane protein | 259.0 | 239.8 | 234.1 | 518.8 | 544.1 | 504.4 | 2.14 | 3.9E-04 |
| BF2820 | putative pyruvate carboxylase                                     | 138.5 | 125.2 | 122.2 | 318.4 | 312.7 | 322.6 | 2.47 | 2.8E-04 |
| BF2821 | hypothetical protein                                              | 123.8 | 143.3 | 121.3 | 238.5 | 232.8 | 192.9 | 1.71 | 9.4E-03 |
| BF2822 | putative nucleotidase                                             | 23.5  | 18.7  | 21.2  | 17.9  | 21.3  | 21.3  | 0.96 | 6.9E-01 |
| BF2823 | hypothetical protein                                              | 7.3   | 10.0  | 9.5   | 3.6   | 5.3   | 2.6   | 0.41 | 3.6E-02 |
| BF2824 | hypothetical protein                                              | 275.1 | 278.1 | 315.5 | 381.2 | 344.4 | 324.4 | 1.21 | 7.1E-02 |
| BF2825 | putative racemase                                                 | 178.6 | 181.5 | 205.6 | 298.0 | 281.9 | 261.6 | 1.49 | 7.4E-03 |
| BF2826 | dihydroorotate dehydrogenase                                      | 306.2 | 307.6 | 337.8 | 601.5 | 651.0 | 528.5 | 1.87 | 3.4E-03 |
| BF2827 | putative phage-related protein                                    | 22.4  | 21.0  | 22.5  | 21.2  | 21.8  | 22.4  | 0.99 | 8.5E-01 |
| BF2828 | hypothetical protein                                              | 4.2   | 5.5   | 5.7   | 6.4   | 7.2   | 8.5   | 1.44 | 8.0E-02 |
| BF2829 | hypothetical protein                                              | 3.5   | 4.8   | 3.8   | 4.0   | 3.2   | 3.3   | 0.87 | 3.7E-01 |
| BF2830 | hypothetical protein                                              | 6.7   | 4.8   | 10.7  | 16.9  | 7.8   | 14.3  | 1.77 | 2.2E-01 |
| BF2831 | hypothetical protein                                              | 4.9   | 7.0   | 5.4   | 5.4   | 3.7   | 7.4   | 0.93 | 8.1E-01 |
| BF2832 | hypothetical protein                                              | 14.8  | 12.7  | 15.8  | 14.4  | 14.6  | 10.2  | 0.90 | 5.4E-01 |
| BF2833 | hypothetical protein                                              | 1.6   | 1.3   | 4.0   | 2.7   | 0.9   | 3.1   | 0.98 | 9.7E-01 |
| BF2835 | hypothetical protein                                              | 0.5   | 0.0   | 0.6   | 0.0   | 0.6   | 0.5   | 1.00 | 9.8E-01 |
| BF2836 | hypothetical protein                                              | 0.6   | 0.6   | 0.9   | 0.4   | 0.2   | 0.6   | 0.53 | 1.4E-01 |
| BF2837 | putative NRPS-secondary metabolite biosynthesis-related protein   | 0.9   | 0.4   | 0.9   | 0.4   | 0.6   | 0.2   | 0.54 | 2.8E-01 |
| BF2838 | putative iron-transport related outer membrane protein            | 1.0   | 0.8   | 0.8   | 0.8   | 0.6   | 0.5   | 0.72 | 1.9E-01 |
| BF2839 | putative two-component system, histidine kinase                   | 0.8   | 0.7   | 0.2   | 0.6   | 0.2   | 0.2   | 0.61 | 4.6E-01 |
| BF2840 | putative two-component system, histidine kinase                   | 0.2   | 0.1   | 0.3   | 0.2   | 0.4   | 0.3   | 1.31 | 5.0E-01 |
| BF2841 | hypothetical protein                                              | 0.3   | 0.7   | 0.4   | 0.2   | 0.4   | 0.1   | 0.46 | 2.1E-01 |
| BF2842 | putative anti sigma factor                                        | 0.0   | 0.4   | 0.0   | 0.4   | 0.0   | 0.4   | 0.90 |         |
| BF2843 | putative anti-anti sigma factor                                   | 0.0   | 0.0   | 0.0   | 0.0   | 0.0   | 0.0   |      |         |
| BF2844 | putative regulatory protein                                       | 0.0   | 0.5   | 0.2   | 0.0   | 0.0   | 0.0   |      |         |
| BF2845 | hypothetical protein                                              | 0.3   | 1.2   | 0.9   | 1.3   | 0.3   | 0.5   | 0.91 | 9.1E-01 |
| BF2846 | hypothetical protein                                              | 2.6   | 1.7   | 2.3   | 0.5   | 2.4   | 2.0   | 0.62 | 4.8E-01 |
| BF2847 | hypothetical protein                                              | 1.1   | 3.4   | 3.5   | 2.7   | 0.0   | 2.7   | 1.16 | 7.8E-01 |
| BF2848 | putative capsular polysaccharide biosynthesis protein             | 82.7  | 89.4  | 95.1  | 150.4 | 145.8 | 129.4 | 1.59 | 5.5E-03 |
| BF2849 | conserved hypothetical PhoH-like protein                          | 229.3 | 236.9 | 221.0 | 290.7 | 320.9 | 281.9 | 1.30 | 1.1E-02 |
| BF2850 | putative folylpolyglutamate synthase                              | 36.8  | 36.5  | 31.1  | 50.2  | 44.2  | 50.0  | 1.39 | 2.1E-02 |
| BF2851 | conserved hypothetical translation inhibitor protein              | 313.1 | 380.2 | 347.5 | 471.1 | 452.1 | 474.5 | 1.35 | 1.7E-02 |
| BF2852 | hypothetical protein                                              | 233.4 | 232.0 | 230.6 | 236.5 | 242.3 | 211.0 | 0.99 | 8.5E-01 |
| BF2853 | putative tRNA:rRNA methyltransferase                              | 223.1 | 234.5 | 239.1 | 216.2 | 207.0 | 213.1 | 0.91 | 3.9E-02 |
| recN   | DNA repair protein                                                | 206.1 | 211.6 | 208.7 | 245.8 | 230.5 | 223.7 | 1.12 | 3.6E-02 |
| dfp    | DNA/pantothenate metabolism flavoprotein                          | 315.2 | 358.1 | 324.5 | 382.4 | 362.7 | 374.0 | 1.12 | 8.1E-02 |
| BF2856 | putative DNA polymerase III epsilon chain                         | 426.3 | 448.6 | 462.7 | 515.3 | 526.3 | 468.7 | 1.13 | 7.9E-02 |
| BF2857 | putative DNA polymerase III beta chain                            | 636.5 | 649.3 | 676.7 | 714.9 | 749.8 | 656.8 | 1.08 | 2.0E-01 |
| BF2858 | hypothetical protein                                              | 948.6 | 988.5 | 841.5 | 836.2 | 709.8 | 895.1 | 0.88 | 2.5E-01 |
| BF2859 | putative conserved exported protein                               | 151.7 | 160.5 | 154.2 | 210.0 | 222.5 | 221.9 | 1.40 | 1.1E-03 |
| BF2860 | putative hydrolase                                                | 181.6 | 204.5 | 181.5 | 124.7 | 124.4 | 125.3 | 0.66 | 2.3E-03 |

|        |                                                        |        |        |        |        |        |        |      |         |
|--------|--------------------------------------------------------|--------|--------|--------|--------|--------|--------|------|---------|
| murB   | UDP-N-acetylenolpyruvoylglucosamine reductase          | 70.5   | 59.6   | 53.5   | 92.1   | 59.3   | 140.5  | 1.51 | 2.5E-01 |
| BF2862 | hypothetical protein                                   | 84.2   | 87.1   | 84.3   | 148.9  | 151.5  | 166.3  | 1.82 | 6.4E-04 |
| BF2863 | putative epimerase                                     | 223.2  | 218.4  | 222.0  | 352.5  | 313.1  | 355.6  | 1.54 | 2.3E-03 |
| kbl    | 2-amino-3-ketobutyrate coenzyme A ligase               | 378.0  | 396.4  | 361.8  | 778.5  | 719.5  | 761.7  | 1.99 | 4.2E-04 |
| BF2865 | hypothetical protein                                   | 246.2  | 282.7  | 228.4  | 102.8  | 109.5  | 107.4  | 0.42 | 1.2E-03 |
| BF2866 | putative lipoprotein                                   | 11.4   | 12.4   | 10.7   | 6.9    | 6.2    | 7.0    | 0.58 | 3.4E-03 |
| BF2867 | hypothetical protein                                   | 2.4    | 1.8    | 0.6    | 0.6    | 0.2    | 0.5    | 0.30 | 1.5E-01 |
| BF2868 | putative lipoprotein                                   | 0.3    | 0.2    | 0.5    | 0.2    | 0.1    | 0.4    | 0.70 | 5.8E-01 |
| BF2869 | putative lipoprotein                                   | 1.0    | 0.5    | 0.4    | 0.5    | 0.0    | 0.3    | 0.67 | 4.1E-01 |
| BF2870 | hypothetical protein                                   | 0.3    | 0.7    | 0.0    | 0.1    | 0.1    | 0.1    | 0.23 | 5.6E-02 |
| BF2871 | putative lipoprotein                                   | 0.3    | 0.5    | 0.4    | 0.0    | 0.2    | 0.3    | 0.62 | 2.6E-01 |
| BF2872 | hypothetical protein                                   | 1.2    | 3.3    | 1.3    | 0.0    | 0.0    | 1.1    | 0.66 |         |
| BF2873 | putative lipoprotein                                   | 0.6    | 0.5    | 0.3    | 0.4    | 0.5    | 0.3    | 0.88 | 6.8E-01 |
| BF2874 | hypothetical protein                                   | 0.5    | 0.1    | 0.4    | 0.4    | 0.0    | 0.6    | 1.53 | 5.2E-01 |
| BF2875 | hypothetical protein                                   | 0.0    | 0.3    | 0.0    | 0.0    | 0.0    | 0.0    |      |         |
| BF2876 | hypothetical protein                                   | 0.0    | 2.5    | 0.5    | 0.0    | 0.0    | 0.0    |      |         |
| tsr25  | tyrosine site-specific recombinase                     | 4.8    | 4.9    | 3.8    | 1.5    | 0.9    | 2.6    | 0.33 | 4.8E-02 |
| BF2878 | hypothetical protein                                   | 36.2   | 45.5   | 34.7   | 32.1   | 34.3   | 46.5   | 0.96 | 8.4E-01 |
| BF2879 | hypothetical protein                                   | 117.6  | 124.0  | 124.7  | 135.2  | 88.3   | 164.1  | 1.02 | 9.2E-01 |
| BF2880 | hypothetical protein                                   | 272.4  | 281.8  | 235.6  | 241.0  | 220.1  | 314.1  | 0.97 | 8.7E-01 |
| BF2881 | hypothetical protein                                   | 18.5   | 12.7   | 9.6    | 2.1    | 1.3    | 7.3    | 0.20 | 7.6E-02 |
| BF2882 | hypothetical protein                                   | 116.0  | 103.5  | 86.6   | 54.2   | 53.5   | 65.4   | 0.57 | 1.5E-02 |
| BF2883 | hypothetical protein                                   | 426.8  | 450.0  | 419.5  | 354.5  | 352.7  | 387.1  | 0.84 | 2.2E-02 |
| ftnA   | ferritin A                                             | 3854.8 | 4003.2 | 3870.3 | 3144.7 | 3207.8 | 3175.7 | 0.81 | 7.4E-04 |
| BF2885 | putative diaminopimelate decarboxylase                 | 960.0  | 1007.5 | 957.2  | 680.6  | 653.1  | 624.5  | 0.67 | 1.1E-03 |
| BF2886 | putative aspartokinase III                             | 1366.0 | 1456.9 | 1396.6 | 1078.6 | 1012.8 | 957.4  | 0.72 | 4.4E-03 |
| ftsE   | Cell division ATP-binding protein                      | 593.7  | 582.4  | 531.8  | 384.7  | 337.9  | 439.8  | 0.68 | 2.1E-02 |
| hisI   | histidine biosynthesis bifunctional protein            | 1050.1 | 963.9  | 820.1  | 660.2  | 616.9  | 700.9  | 0.70 | 2.6E-02 |
| hisF   | imidazole glycerol phosphate synthase subunit          | 418.8  | 336.0  | 318.4  | 165.2  | 158.7  | 262.3  | 0.54 | 4.8E-02 |
| hisA   | imidazole-4-carboxamide isomerase                      | 512.7  | 386.3  | 391.3  | 204.6  | 221.6  | 250.9  | 0.53 | 1.2E-02 |
| hisH   | imidazole glycerol phosphate synthase subunit          | 441.9  | 455.4  | 393.9  | 232.9  | 217.1  | 291.0  | 0.57 | 1.2E-02 |
| BFt41  | tRNA-Asp-GTC                                           | 0.0    | 0.0    | 0.0    | 0.0    | 0.0    | 0.0    |      |         |
| BFt42  | tRNA-Asp-GTC                                           | 201.7  | 232.1  | 138.2  | 334.4  | 237.6  | 594.7  | 1.94 | 1.5E-01 |
| BF2892 | hypothetical protein                                   | 17.8   | 21.1   | 20.3   | 13.6   | 15.8   | 10.5   | 0.67 | 6.3E-02 |
| BF2893 | hypothetical protein                                   | 74.9   | 82.3   | 86.7   | 119.2  | 139.1  | 117.7  | 1.54 | 9.4E-03 |
| BF2894 | hypothetical protein                                   | 2.6    | 0.9    | 0.9    | 0.8    | 2.0    | 0.0    | 0.97 | 9.7E-01 |
| BF2895 | hypothetical protein                                   | 88.7   | 90.6   | 85.2   | 73.0   | 75.6   | 75.1   | 0.85 | 4.8E-03 |
| BF2896 | putative regulatory protein                            | 91.9   | 106.9  | 96.4   | 97.3   | 97.9   | 121.5  | 1.07 | 5.5E-01 |
| BF2897 | hypothetical protein                                   | 9.6    | 7.7    | 4.8    | 6.9    | 8.4    | 10.6   | 1.20 | 5.7E-01 |
| BF2898 | putative regulatory protein                            | 20.8   | 14.0   | 14.7   | 18.7   | 15.9   | 32.5   | 1.31 | 4.1E-01 |
| BF2899 | hypothetical protein                                   | 1.7    | 1.8    | 1.9    | 1.4    | 1.9    | 1.7    | 0.93 | 6.1E-01 |
| BF2900 | putative exported hydrolase                            | 1.4    | 1.5    | 1.4    | 1.6    | 1.7    | 2.3    | 1.30 | 1.2E-01 |
| BF2901 | putative uroporphyrinogen biosynthesis-related protein | 1.2    | 0.2    | 1.7    | 1.2    | 1.0    | 0.5    | 1.14 | 8.9E-01 |
| BF2902 | hypothetical protein                                   | 1.2    | 0.0    | 0.0    | 0.3    | 0.7    | 1.4    | 0.55 |         |

|        |                                                           |        |        |        |        |        |        |      |         |
|--------|-----------------------------------------------------------|--------|--------|--------|--------|--------|--------|------|---------|
| BF2903 | putative dimethylamine corrinoid protein                  | 1.4    | 0.3    | 0.6    | 0.3    | 1.0    | 1.6    | 1.17 | 8.6E-01 |
| BF2904 | putative methyltransferase                                | 1.1    | 1.1    | 0.5    | 1.5    | 0.7    | 1.6    | 1.41 | 5.1E-01 |
| BF2905 | putative exported hydrolase                               | 0.2    | 0.6    | 0.7    | 0.9    | 0.9    | 0.4    | 1.57 | 4.6E-01 |
| BF2906 | hypothetical protein                                      | 1.4    | 1.2    | 1.7    | 3.8    | 5.8    | 4.8    | 3.32 | 5.9E-03 |
| BF2907 | hypothetical protein                                      | 1.9    | 2.3    | 2.5    | 5.2    | 5.8    | 4.4    | 2.32 | 5.8E-03 |
| BF2908 | hypothetical protein                                      | 17.4   | 17.7   | 20.8   | 27.1   | 35.8   | 23.6   | 1.53 | 6.1E-02 |
| BF2909 | hypothetical protein                                      | 14.7   | 11.4   | 23.6   | 22.8   | 31.0   | 21.8   | 1.57 | 1.8E-01 |
| BF2910 | putative ECF sigma factor                                 | 102.0  | 87.7   | 94.1   | 157.4  | 165.6  | 117.4  | 1.54 | 3.9E-02 |
| BF2911 | hypothetical protein                                      | 0.7    | 0.0    | 0.0    | 0.7    | 0.8    | 0.0    | 1.05 |         |
| BF2912 | hypothetical protein                                      | 62.5   | 76.0   | 87.7   | 153.1  | 218.1  | 127.1  | 2.17 | 2.9E-02 |
| BF2913 | hypothetical protein                                      | 173.5  | 180.7  | 180.2  | 617.4  | 633.5  | 525.8  | 3.31 | 4.0E-04 |
| BF2915 | hypothetical protein                                      | 67.0   | 75.7   | 81.3   | 232.1  | 283.5  | 221.8  | 3.28 | 1.3E-03 |
| BF2916 | putative CTP pyrophosphohydrolase                         | 55.7   | 37.3   | 57.4   | 23.4   | 42.1   | 31.4   | 0.64 | 1.6E-01 |
| BF2917 | putative restriction enzyme related protein               | 79.5   | 81.6   | 90.6   | 85.8   | 93.0   | 74.0   | 1.00 | 9.9E-01 |
| BF2918 | hypothetical protein                                      | 35.5   | 40.1   | 42.5   | 41.4   | 45.0   | 35.8   | 1.03 | 7.7E-01 |
| BF2919 | hypothetical protein                                      | 10.1   | 16.1   | 9.8    | 12.6   | 13.9   | 12.1   | 1.10 | 6.6E-01 |
| BF2920 | hypothetical protein                                      | 51.9   | 48.3   | 41.1   | 44.8   | 43.2   | 46.7   | 0.96 | 6.5E-01 |
| BF2921 | putative arsenate reductase                               | 25.7   | 28.1   | 23.8   | 35.6   | 32.3   | 40.0   | 1.39 | 2.9E-02 |
| BF2922 | hypothetical protein                                      | 13.4   | 11.6   | 11.9   | 15.7   | 13.3   | 17.2   | 1.25 | 1.1E-01 |
| BF2923 | hypothetical protein                                      | 13.2   | 14.1   | 14.9   | 19.4   | 14.6   | 18.4   | 1.23 | 1.3E-01 |
| BF2924 | hypothetical protein                                      | 13.1   | 9.9    | 15.0   | 24.9   | 22.8   | 25.8   | 1.96 | 1.6E-02 |
| BF2925 | hypothetical protein                                      | 15.5   | 11.3   | 12.1   | 19.3   | 15.6   | 17.2   | 1.34 | 9.5E-02 |
| BF2926 | hypothetical protein                                      | 17.2   | 17.1   | 17.0   | 18.6   | 17.9   | 25.1   | 1.19 | 2.5E-01 |
| BF2927 | hypothetical protein                                      | 10.7   | 10.6   | 5.0    | 10.1   | 10.6   | 8.1    | 1.15 | 6.8E-01 |
| BF2928 | putative K(+) transport-related membrane protein          | 6.6    | 3.4    | 5.8    | 1.7    | 1.4    | 2.5    | 0.36 | 3.4E-02 |
| BF2929 | putative AraC-family regulatory protein                   | 42.9   | 37.5   | 39.1   | 38.3   | 43.5   | 41.2   | 1.03 | 6.8E-01 |
| BF2930 | putative antibiotic resistance transport membrane protein | 0.3    | 0.2    | 0.3    | 0.4    | 0.0    | 0.3    | 1.40 | 4.2E-01 |
| BF2931 | putative oxidoreductase                                   | 38.1   | 48.8   | 33.0   | 64.7   | 53.9   | 75.0   | 1.62 | 5.6E-02 |
| BF2932 | putative AraC-family regulatory protein                   | 25.5   | 31.4   | 25.8   | 32.7   | 34.2   | 39.4   | 1.29 | 7.5E-02 |
| BF2933 | hypothetical protein                                      | 173.8  | 155.7  | 143.2  | 125.1  | 108.2  | 109.7  | 0.73 | 2.5E-02 |
| BF2934 | hypothetical protein                                      | 399.0  | 366.1  | 319.4  | 141.3  | 125.4  | 155.2  | 0.39 | 2.2E-03 |
| BF2935 | hypothetical protein                                      | 281.6  | 282.9  | 236.5  | 111.0  | 87.7   | 133.5  | 0.41 | 8.2E-03 |
| BF2936 | putative hydrolase                                        | 84.4   | 81.4   | 85.2   | 65.9   | 60.0   | 58.0   | 0.73 | 5.4E-03 |
| BF2937 | hypothetical protein                                      | 217.8  | 228.0  | 210.3  | 221.6  | 206.4  | 214.8  | 0.98 | 6.2E-01 |
| BF2938 | diphosphate-fructose-6-phosphate 1-phosphotransferase     | 1372.4 | 1431.7 | 1511.0 | 1806.4 | 1767.6 | 1670.6 | 1.22 | 1.5E-02 |
| BF2939 | putative lipoprotein                                      | 120.4  | 136.1  | 139.7  | 261.2  | 252.5  | 265.0  | 1.97 | 9.7E-04 |
| BF2940 | hypothetical protein                                      | 11.9   | 11.0   | 13.6   | 35.4   | 31.9   | 24.0   | 2.48 | 7.1E-03 |
| BF2941 | hypothetical protein                                      | 5.0    | 6.0    | 5.1    | 21.3   | 26.4   | 16.8   | 3.96 | 2.8E-03 |
| BF2942 | hypothetical protein                                      | 4.2    | 4.0    | 5.4    | 19.5   | 25.5   | 17.4   | 4.56 | 2.3E-03 |
| BF2943 | hypothetical protein                                      | 8.3    | 6.4    | 6.3    | 7.6    | 10.8   | 7.2    | 1.22 | 3.5E-01 |
| BF2944 | putative sigma factor                                     | 50.8   | 57.1   | 53.4   | 20.4   | 32.4   | 24.4   | 0.47 | 1.4E-02 |
| BF2945 | putative outer membrane protein                           | 70.1   | 73.1   | 62.8   | 34.2   | 31.6   | 34.5   | 0.49 | 1.1E-03 |
| acrD   | putative aminoglycoside efflux pump                       | 72.7   | 71.9   | 65.7   | 27.5   | 29.0   | 30.0   | 0.41 | 3.3E-04 |
| BF2947 | putative acriflavine resistance protein E precursor       | 60.3   | 38.5   | 43.4   | 16.0   | 13.0   | 23.7   | 0.37 | 2.3E-02 |
| BF2948 | hypothetical protein                                      | 26.7   | 25.6   | 21.4   | 36.3   | 34.7   | 32.8   | 1.42 | 2.0E-02 |



|        |                                                                   |        |        |        |        |        |        |      |         |
|--------|-------------------------------------------------------------------|--------|--------|--------|--------|--------|--------|------|---------|
| BF2949 | hypothetical protein                                              | 1172.4 | 1145.6 | 1240.7 | 861.0  | 865.6  | 699.7  | 0.68 | 1.6E-02 |
| BF2950 | putative acyltransferase                                          | 791.8  | 842.2  | 915.1  | 552.7  | 645.5  | 556.1  | 0.69 | 1.2E-02 |
| BF2951 | putative hydrolase                                                | 83.5   | 89.8   | 92.2   | 78.3   | 80.8   | 77.1   | 0.89 | 4.4E-02 |
| BF2952 | putative N-acetylglucosamine-6-phosphate deacetylase              | 70.0   | 74.6   | 66.4   | 287.3  | 263.8  | 291.8  | 3.99 | 1.4E-04 |
| BF2953 | glucosamine-6-phosphate deaminase                                 | 1048.3 | 1100.5 | 1071.7 | 1186.8 | 1171.0 | 1084.1 | 1.07 | 1.5E-01 |
| BF2954 | hypothetical protein                                              | 75.7   | 72.6   | 69.5   | 43.4   | 39.9   | 34.4   | 0.54 | 4.0E-03 |
| BF2955 | hypothetical protein                                              | 62.2   | 64.9   | 60.2   | 58.0   | 59.3   | 60.8   | 0.95 | 1.8E-01 |
| BF2956 | hypothetical protein                                              | 5.1    | 9.4    | 8.1    | 5.6    | 3.4    | 4.2    | 0.59 | 1.3E-01 |
| BF2957 | hypothetical protein                                              | 716.0  | 658.0  | 632.9  | 795.0  | 817.6  | 691.5  | 1.15 | 1.4E-01 |
| BF2958 | hypothetical protein                                              | 553.5  | 537.9  | 562.3  | 660.6  | 742.1  | 601.2  | 1.21 | 6.6E-02 |
| BF2959 | hypothetical protein                                              | 409.3  | 454.4  | 441.7  | 555.1  | 592.1  | 495.3  | 1.26 | 3.8E-02 |
| BF2960 | hypothetical protein                                              | 195.9  | 198.0  | 212.3  | 216.7  | 234.5  | 243.4  | 1.15 | 5.8E-02 |
| BF2961 | hypothetical protein                                              | 127.6  | 140.1  | 141.3  | 132.9  | 144.3  | 160.8  | 1.07 | 4.3E-01 |
| BF2962 | hypothetical protein                                              | 88.9   | 94.9   | 84.6   | 88.1   | 87.5   | 96.9   | 1.01 | 8.1E-01 |
| BF2963 | putative transcription-repair coupling factor                     | 99.7   | 90.8   | 84.2   | 90.9   | 86.8   | 96.4   | 1.00 | 9.9E-01 |
| BF2964 | putative glycosyltransferase                                      | 223.6  | 204.4  | 196.4  | 192.3  | 190.2  | 208.4  | 0.95 | 3.9E-01 |
| BF2965 | dihydroorotase                                                    | 195.4  | 175.4  | 185.6  | 213.8  | 216.4  | 205.2  | 1.14 | 3.7E-02 |
| BF2966 | hypothetical protein                                              | 186.5  | 198.3  | 212.4  | 191.8  | 215.2  | 165.3  | 0.95 | 6.7E-01 |
| BF2967 | putative 5-methyltetrahydrofolate--homocysteine methyltransferase | 163.3  | 141.7  | 147.3  | 138.0  | 136.4  | 130.5  | 0.90 | 1.2E-01 |
| BF2968 | hypothetical protein                                              | 150.6  | 147.1  | 128.7  | 197.9  | 205.0  | 187.8  | 1.39 | 1.1E-02 |
| BF2969 | hypothetical protein                                              | 24.6   | 20.3   | 23.2   | 18.6   | 21.2   | 19.3   | 0.87 | 1.6E-01 |
| BF2970 | hypothetical protein                                              | 14.4   | 11.5   | 12.4   | 9.5    | 11.1   | 9.0    | 0.77 | 7.7E-02 |
| BF2971 | putative lipoprotein                                              | 46.7   | 36.8   | 42.7   | 44.3   | 41.1   | 40.2   | 1.00 | 9.9E-01 |
| BF2972 | hypothetical protein                                              | 1.8    | 0.0    | 1.0    | 0.0    | 0.0    | 1.7    | 1.29 |         |
| BF2973 | hypothetical protein                                              | 20.6   | 29.3   | 17.2   | 14.4   | 21.0   | 20.5   | 0.84 | 5.1E-01 |
| BF2974 | hypothetical protein                                              | 73.1   | 73.1   | 70.8   | 62.3   | 66.0   | 75.7   | 0.94 | 4.0E-01 |
| BF2975 | putative RNA polymerase sigma factor                              | 59.2   | 61.1   | 54.5   | 96.8   | 109.1  | 101.0  | 1.76 | 1.7E-03 |
| BF2976 | hypothetical protein                                              | 45.2   | 38.8   | 43.8   | 96.6   | 96.7   | 93.2   | 2.24 | 6.2E-04 |
| BF2977 | hypothetical protein                                              | 75.8   | 69.0   | 58.8   | 50.3   | 48.1   | 60.5   | 0.78 | 1.1E-01 |
| BF2978 | putative ABC transport system, ATP-binding protein                | 86.9   | 83.8   | 71.8   | 55.5   | 50.5   | 70.1   | 0.72 | 7.6E-02 |
| BF2979 | putative ABC transport system, membrane protein                   | 49.6   | 50.0   | 40.4   | 49.2   | 43.4   | 58.0   | 1.07 | 6.2E-01 |
| BF2980 | hypothetical protein                                              | 13.0   | 10.2   | 19.6   | 18.8   | 16.6   | 17.1   | 1.27 | 3.5E-01 |
| BF2981 | putative exonuclease                                              | 27.5   | 23.6   | 20.2   | 31.6   | 24.5   | 42.6   | 1.36 | 2.3E-01 |
| BF2982 | putative exonuclease                                              | 37.5   | 41.7   | 29.6   | 30.7   | 27.5   | 47.9   | 0.96 | 8.6E-01 |
| BF2983 | putative phospholipids biosynthesis-related protein               | 140.7  | 139.7  | 144.0  | 106.6  | 106.1  | 85.9   | 0.70 | 1.8E-02 |
| BF2984 | putative ABC transport system, membrane protein                   | 15.4   | 15.2   | 15.1   | 67.7   | 72.2   | 66.7   | 4.51 | 1.3E-05 |
| BF2985 | putative ABC transport system, exported protein                   | 13.9   | 16.7   | 14.7   | 71.1   | 67.3   | 61.8   | 4.42 | 3.2E-04 |
| BF2986 | putative ABC transport system, membrane protein                   | 17.0   | 19.8   | 18.9   | 64.7   | 70.4   | 62.8   | 3.56 | 3.0E-04 |
| BF2987 | putative ABC transport system, lipoprotein                        | 33.8   | 26.1   | 23.6   | 71.2   | 68.9   | 69.9   | 2.54 | 3.8E-03 |
| BF2988 | hypothetical protein                                              | 10.7   | 7.3    | 9.8    | 14.6   | 16.2   | 16.8   | 1.73 | 2.3E-02 |
| BF2989 | putative signal peptidase I                                       | 14.9   | 10.5   | 10.0   | 7.5    | 11.9   | 12.5   | 0.89 | 6.8E-01 |

|        |                                                                 |        |        |        |        |        |        |       |         |
|--------|-----------------------------------------------------------------|--------|--------|--------|--------|--------|--------|-------|---------|
| BF2990 | putative lipoprotein                                            | 46.3   | 39.2   | 42.3   | 27.8   | 31.8   | 32.6   | 0.72  | 2.0E-02 |
| BF2991 | hypothetical protein                                            | 3.7    | 3.6    | 2.7    | 3.8    | 2.9    | 4.5    | 1.10  | 6.6E-01 |
| BF2992 | hypothetical protein                                            | 7.3    | 5.4    | 7.5    | 6.6    | 3.8    | 4.5    | 0.73  | 2.4E-01 |
| BF2993 | hypothetical protein                                            | 3.3    | 2.1    | 2.3    | 7.4    | 4.7    | 8.1    | 2.56  | 2.6E-02 |
| BF2994 | hypothetical protein                                            | 5.6    | 7.0    | 4.1    | 15.9   | 14.1   | 31.3   | 3.53  | 2.7E-02 |
| BF2995 | hypothetical protein                                            | 6.9    | 5.2    | 5.4    | 42.7   | 35.4   | 58.4   | 7.67  | 1.5E-03 |
| BF2996 | hypothetical protein                                            | 1.5    | 3.3    | 3.4    | 38.1   | 23.3   | 38.6   | 12.55 | 4.4E-03 |
| BF2997 | putative lipoprotein                                            | 4.8    | 6.5    | 7.1    | 50.1   | 44.6   | 59.2   | 8.43  | 9.1E-04 |
| BF2998 | hypothetical protein                                            | 6.8    | 6.5    | 10.5   | 83.6   | 64.1   | 99.1   | 10.40 | 1.6E-03 |
| BF2999 | hypothetical protein                                            | 8.5    | 7.1    | 8.7    | 174.6  | 140.2  | 211.1  | 21.31 | 2.9E-04 |
| BF3000 | hypothetical protein                                            | 7.3    | 8.3    | 5.6    | 140.0  | 116.2  | 162.8  | 19.86 | 4.3E-04 |
| BF3001 | hypothetical protein                                            | 16.0   | 14.4   | 13.1   | 352.5  | 335.1  | 454.8  | 26.13 | 1.4E-04 |
| BF3002 | hypothetical protein                                            | 16.3   | 12.0   | 18.6   | 518.9  | 478.1  | 531.8  | 33.14 | 2.0E-04 |
| BF3003 | putative lipoprotein                                            | 37.6   | 41.7   | 46.5   | 1376.0 | 1214.2 | 1739.8 | 34.18 | 1.5E-04 |
| BF3004 | hypothetical protein                                            | 49.6   | 54.5   | 48.1   | 1755.2 | 1460.2 | 1629.1 | 31.78 | 2.1E-05 |
| BF3005 | hypothetical protein                                            | 35.2   | 36.5   | 38.4   | 14.2   | 17.7   | 12.1   | 0.39  | 4.6E-03 |
| BF3006 | hypothetical protein                                            | 55.2   | 63.5   | 78.3   | 103.3  | 102.9  | 72.6   | 1.41  | 1.3E-01 |
| BF3007 | hypothetical protein                                            | 43.7   | 39.6   | 47.0   | 26.5   | 30.1   | 26.8   | 0.64  | 6.9E-03 |
| BF3008 | hypothetical protein                                            | 304.3  | 284.8  | 315.8  | 128.7  | 121.1  | 131.7  | 0.42  | 3.2E-04 |
| BF3009 | putative regulatory protein                                     | 182.9  | 177.8  | 175.0  | 139.2  | 146.8  | 143.4  | 0.80  | 1.9E-03 |
| BF3010 | hypothetical protein                                            | 342.5  | 352.0  | 354.9  | 312.8  | 299.1  | 265.6  | 0.83  | 4.2E-02 |
| BF3011 | hypothetical protein                                            | 299.9  | 313.6  | 307.4  | 250.9  | 248.0  | 217.9  | 0.78  | 1.5E-02 |
| BF3012 | hypothetical protein                                            | 22.2   | 23.6   | 17.0   | 11.9   | 13.4   | 20.4   | 0.71  | 2.1E-01 |
| BF3013 | hypothetical protein                                            | 3.6    | 3.5    | 4.5    | 1.3    | 0.7    | 1.8    | 0.31  | 2.9E-02 |
| BF3014 | hypothetical protein                                            | 0.9    | 1.2    | 0.7    | 0.2    | 0.3    | 0.4    | 0.31  | 2.2E-02 |
| BF3015 | putative thioredoxin                                            | 2461.4 | 2267.4 | 2508.3 | 641.9  | 726.4  | 656.0  | 0.28  | 2.0E-04 |
| BF3016 | putative thioredoxin family protein                             | 2213.6 | 2143.7 | 2494.0 | 668.9  | 715.5  | 601.7  | 0.29  | 5.1E-04 |
| BF3017 | hypothetical protein                                            | 288.8  | 225.8  | 270.7  | 215.9  | 268.5  | 274.7  | 0.97  | 8.1E-01 |
| BF3018 | putative rubrerythrin-like protein                              | 2442.2 | 2022.5 | 2535.3 | 1670.9 | 2193.4 | 1556.6 | 0.77  | 1.5E-01 |
| BF3019 | putative iron uptake-related regulatory protein                 | 2761.1 | 2145.9 | 2403.3 | 1960.7 | 2337.2 | 1672.6 | 0.81  | 2.2E-01 |
| BF3020 | hypothetical protein                                            | 262.1  | 316.6  | 315.5  | 410.4  | 483.7  | 387.7  | 1.43  | 3.4E-02 |
| BF3021 | putative peptidyl-dipeptidase                                   | 151.0  | 150.9  | 146.6  | 222.3  | 232.1  | 209.7  | 1.48  | 1.3E-03 |
| nadE   | NAD(+) synthetase                                               | 199.6  | 200.2  | 202.9  | 204.4  | 203.4  | 189.6  | 0.99  | 7.8E-01 |
| BF3023 | hypothetical protein                                            | 18.1   | 22.7   | 18.5   | 19.3   | 26.2   | 23.0   | 1.15  | 3.5E-01 |
| BF3024 | hypothetical protein                                            | 1.0    | 1.2    | 1.3    | 1.1    | 0.8    | 0.5    | 0.66  | 2.4E-01 |
| BF3025 | hypothetical protein                                            | 1.2    | 1.0    | 1.2    | 0.6    | 0.7    | 0.7    | 0.57  | 8.0E-03 |
| BF3026 | hypothetical protein                                            | 14.6   | 12.7   | 17.0   | 5.2    | 6.3    | 4.7    | 0.37  | 4.2E-03 |
| hisB   | imidazole glycerol-phosphate dehydratase/histidinol phosphatase | 304.8  | 297.5  | 306.9  | 234.7  | 234.1  | 227.4  | 0.77  | 4.4E-04 |
| BF3028 | putative histidine biosynthesis-related aminotransferase        | 166.1  | 164.4  | 178.0  | 113.1  | 141.9  | 127.9  | 0.75  | 3.1E-02 |
| hisD   | putative histidinol dehydrogenase                               | 169.7  | 183.2  | 180.9  | 113.4  | 133.2  | 137.8  | 0.72  | 1.6E-02 |
| hisG   | ATP phosphoribosyltransferase                                   | 234.2  | 243.2  | 247.4  | 160.6  | 182.7  | 150.8  | 0.68  | 8.2E-03 |
| BF3031 | putative thioesterase                                           | 82.1   | 92.7   | 82.5   | 125.4  | 120.0  | 125.6  | 1.44  | 3.8E-03 |
| BF3032 | putative Pirin-like protein                                     | 832.9  | 843.0  | 837.0  | 217.8  | 206.9  | 218.8  | 0.26  | 5.8E-06 |
| BF3033 | putative exported cytochrome C biogenesis-related protein       | 377.0  | 392.2  | 389.9  | 301.3  | 339.1  | 289.1  | 0.80  | 2.3E-02 |
| BF3034 | hypothetical protein                                            | 171.2  | 151.4  | 193.0  | 175.0  | 171.6  | 186.8  | 1.04  | 6.9E-01 |
| udk    | uridine kinase                                                  | 134.3  | 134.9  | 133.3  | 170.0  | 164.8  | 169.0  | 1.25  | 3.1E-04 |

|        |                                                                   |       |       |       |       |       |       |      |         |
|--------|-------------------------------------------------------------------|-------|-------|-------|-------|-------|-------|------|---------|
| BF3036 | putative exported transglycosylase protein                        | 84.8  | 86.7  | 88.9  | 109.3 | 114.8 | 111.8 | 1.29 | 1.2E-03 |
| BF3037 | putative sodium/proline symporter membrane protein                | 86.3  | 84.4  | 96.4  | 104.0 | 110.0 | 100.4 | 1.18 | 5.1E-02 |
| BF3038 | putative nitroreductase                                           | 115.0 | 109.0 | 111.3 | 102.9 | 103.8 | 122.9 | 0.98 | 8.0E-01 |
| metH   | putative 5-methyltetrahydrofolate--homocysteine methyltransferase | 171.4 | 164.8 | 175.3 | 154.4 | 154.4 | 161.2 | 0.92 | 4.1E-02 |
| BF3040 | SsrA-binding protein                                              | 306.9 | 266.8 | 309.7 | 273.9 | 266.1 | 255.6 | 0.90 | 1.7E-01 |
| BF3041 | hypothetical protein                                              | 199.2 | 226.1 | 253.3 | 208.2 | 251.7 | 217.3 | 1.00 | 1.0E+00 |
| BF3042 | putative lipoprotein                                              | 525.2 | 519.9 | 587.3 | 618.6 | 688.1 | 538.8 | 1.13 | 2.8E-01 |
| BF3043 | hypothetical protein                                              | 186.0 | 143.1 | 182.3 | 121.5 | 136.2 | 150.7 | 0.80 | 1.5E-01 |
| BF3044 | hypothetical protein                                              | 94.1  | 76.5  | 81.6  | 12.8  | 12.1  | 15.5  | 0.16 | 4.5E-04 |
| BF3045 | hypothetical protein                                              | 809.9 | 779.9 | 765.6 | 885.7 | 844.2 | 790.7 | 1.07 | 2.0E-01 |
| BF3046 | hypothetical protein                                              | 915.1 | 921.2 | 911.0 | 890.6 | 888.1 | 832.8 | 0.95 | 1.2E-01 |
| BF3047 | 3-oxoacyl-(acyl carrier protein) synthase                         | 83.2  | 76.4  | 84.7  | 99.3  | 84.2  | 82.8  | 1.09 | 3.4E-01 |
| BF3048 | cytoplasmic alpha-amylase                                         | 135.6 | 124.7 | 158.0 | 50.3  | 55.5  | 46.5  | 0.36 | 1.7E-03 |
| BF3049 | putative ribonuclease                                             | 64.7  | 81.4  | 78.7  | 19.8  | 19.4  | 21.3  | 0.27 | 6.1E-04 |
| BF3050 | hypothetical protein                                              | 161.6 | 155.5 | 165.2 | 46.4  | 53.5  | 54.3  | 0.32 | 3.3E-04 |
| rho    | transcription termination factor Rho                              | 341.1 | 332.2 | 322.9 | 241.8 | 209.1 | 228.5 | 0.68 | 4.0E-03 |
| BF3053 | putative two-component system sensor histidine kinase             | 21.0  | 24.2  | 19.8  | 16.2  | 16.2  | 16.1  | 0.75 | 1.9E-02 |
| BF3054 | putative two-component system sensor histidine kinase             | 2.8   | 3.2   | 2.9   | 1.6   | 1.1   | 2.0   | 0.53 | 3.5E-02 |
| BF3055 | putative antiporter membrane protein                              | 32.3  | 47.5  | 37.2  | 29.2  | 28.9  | 37.6  | 0.82 | 3.1E-01 |
| ffh    | signal recognition particle protein                               | 498.9 | 522.4 | 482.1 | 561.8 | 455.9 | 571.7 | 1.05 | 6.1E-01 |
| BF3057 | putative thiol:disulfide oxidoreductase                           | 65.3  | 69.6  | 50.1  | 149.8 | 144.8 | 139.0 | 2.37 | 4.3E-03 |
| BF3058 | putative methenyltetrahydrofolate cyclohydrolase                  | 144.0 | 137.7 | 119.4 | 430.0 | 355.3 | 458.9 | 3.09 | 1.6E-03 |
| BF3059 | hypothetical protein                                              | 13.2  | 15.3  | 14.2  | 66.3  | 59.2  | 57.6  | 4.29 | 2.5E-04 |
| BF3060 | hypothetical protein                                              | 11.8  | 14.4  | 14.9  | 38.3  | 35.4  | 40.5  | 2.78 | 1.4E-03 |
| BFt43  | tRNA-His-GTG                                                      | 20.9  | 17.3  | 20.5  | 44.0  | 37.6  | 46.8  | 2.19 | 3.6E-03 |
| BF3061 | hypothetical protein                                              | 661.9 | 679.6 | 705.6 | 533.1 | 570.8 | 478.4 | 0.77 | 2.0E-02 |
| BF3062 | hypothetical protein                                              | 692.4 | 707.7 | 772.0 | 537.8 | 597.4 | 467.8 | 0.74 | 3.4E-02 |
| BF3063 | putative ABC transport system, ATP-binding protein                | 659.9 | 596.0 | 659.7 | 433.9 | 448.8 | 364.5 | 0.65 | 1.1E-02 |
| BF3064 | hypothetical protein                                              | 607.5 | 527.2 | 580.2 | 368.2 | 432.7 | 350.6 | 0.67 | 1.5E-02 |
| BF3065 | putative lipoprotein                                              | 769.8 | 695.2 | 738.0 | 544.6 | 540.9 | 504.4 | 0.72 | 4.1E-03 |
| BF3066 | hypothetical protein                                              | 566.3 | 503.0 | 500.4 | 429.4 | 437.8 | 423.8 | 0.82 | 2.1E-02 |
| BF3067 | putative lipoprotein                                              | 658.6 | 619.1 | 660.3 | 629.4 | 685.2 | 549.3 | 0.96 | 6.3E-01 |
| BF3068 | hypothetical protein                                              | 328.4 | 295.9 | 331.8 | 258.0 | 232.3 | 244.2 | 0.77 | 1.3E-02 |
| BF3069 | hypothetical protein                                              | 1.3   | 6.7   | 5.5   | 1.2   | 1.4   | 2.4   | 0.45 | 3.0E-01 |
| BF3070 | hypothetical protein                                              | 344.3 | 306.1 | 317.1 | 173.7 | 176.8 | 180.8 | 0.55 | 6.7E-04 |
| BF3071 | putative DNA polymerase III                                       | 190.7 | 195.4 | 175.6 | 197.3 | 206.9 | 205.2 | 1.09 | 1.2E-01 |
| BF3072 | putative septum formation initiator-related protein               | 184.6 | 171.0 | 155.2 | 145.2 | 124.7 | 163.1 | 0.84 | 2.0E-01 |
| BF3073 | hypothetical protein                                              | 150.4 | 134.4 | 130.7 | 119.7 | 111.3 | 127.6 | 0.86 | 1.0E-01 |
| BF3074 | hypothetical protein                                              | 30.3  | 29.4  | 31.9  | 23.0  | 26.5  | 27.0  | 0.83 | 5.6E-02 |
| BF3075 | hypothetical protein                                              | 2.1   | 2.8   | 2.9   | 0.4   | 1.2   | 1.7   | 0.37 | 1.3E-01 |
| BF3076 | hypothetical protein                                              | 71.4  | 63.4  | 70.4  | 41.4  | 43.4  | 47.8  | 0.65 | 5.2E-03 |
| BF3077 | hypothetical protein                                              | 560.4 | 540.7 | 626.2 | 729.5 | 740.5 | 647.1 | 1.23 | 5.3E-02 |

|        |                                                                                  |        |        |        |        |        |        |        |         |
|--------|----------------------------------------------------------------------------------|--------|--------|--------|--------|--------|--------|--------|---------|
| BF3078 | hypothetical protein                                                             | 423.0  | 372.2  | 397.7  | 213.0  | 216.5  | 268.4  | 0.58   | 8.5E-03 |
| pepD   | putative aminoacyl-histidine dipeptidase                                         | 493.4  | 495.6  | 460.5  | 439.9  | 416.7  | 425.1  | 0.88   | 2.7E-02 |
| BF3080 | putative conserved exported protein                                              | 68.7   | 78.9   | 68.0   | 33.3   | 37.9   | 39.1   | 0.51   | 2.8E-03 |
| BF3081 | hypothetical protein                                                             | 167.4  | 173.4  | 185.5  | 83.0   | 92.4   | 82.6   | 0.49   | 8.2E-04 |
| tal    | transaldolase                                                                    | 582.8  | 618.2  | 565.8  | 861.9  | 806.9  | 916.2  | 1.46   | 4.2E-03 |
| BF3083 | putative exported fucosidase                                                     | 75.7   | 70.8   | 60.4   | 481.5  | 422.6  | 543.8  | 6.99   | 4.2E-04 |
| BF3084 | putative exported beta-galactosidase                                             | 62.6   | 65.2   | 54.1   | 452.2  | 415.4  | 468.3  | 7.36   | 1.4E-04 |
| BF3085 | putative exported glycosyl hydrolase                                             | 8.6    | 9.6    | 7.2    | 380.8  | 350.7  | 425.5  | 45.74  | 6.2E-05 |
| BF3086 | putative exported sulfatase                                                      | 8.1    | 6.7    | 6.0    | 835.1  | 809.0  | 791.0  | 117.64 | 2.1E-05 |
| BF3087 | putative exported sulfatase                                                      | 102.5  | 88.7   | 93.1   | 330.3  | 331.6  | 343.1  | 3.54   | 1.6E-04 |
| BF3088 | putative exported hexosaminidase                                                 | 109.2  | 109.9  | 108.0  | 155.5  | 165.2  | 163.5  | 1.48   | 3.9E-04 |
| BF3089 | putative two-component system histidine kinase/response regulator fusion protein | 272.7  | 335.8  | 278.6  | 165.0  | 119.8  | 239.5  | 0.57   | 9.0E-02 |
| fbaB   | fructose-bisphosphate aldolase                                                   | 1754.8 | 1992.7 | 1778.6 | 594.6  | 569.8  | 831.0  | 0.36   | 4.5E-03 |
| gpmA   | phosphoglyceromutase                                                             | 1950.9 | 2157.8 | 1883.7 | 574.7  | 566.7  | 679.1  | 0.30   | 6.2E-04 |
| BF3092 | hypothetical protein                                                             | 17.9   | 17.4   | 15.3   | 49.3   | 51.1   | 61.7   | 3.20   | 1.1E-03 |
| BF3093 | putative ABC transport system, ATP-binding protein                               | 42.4   | 43.7   | 35.9   | 64.9   | 58.3   | 71.1   | 1.59   | 1.3E-02 |
| BF3094 | putative sulfatase                                                               | 15.1   | 11.3   | 12.2   | 28.7   | 24.3   | 28.2   | 2.11   | 6.2E-03 |
| BF3095 | putative exported hydrolase                                                      | 9.6    | 9.3    | 9.2    | 18.5   | 15.9   | 21.4   | 1.97   | 5.3E-03 |
| BF3096 | putative lipoprotein                                                             | 2.3    | 2.1    | 2.3    | 9.4    | 9.0    | 8.9    | 4.09   | 3.6E-05 |
| BF3097 | hypothetical protein                                                             | 2.8    | 3.4    | 2.5    | 6.3    | 7.2    | 6.3    | 2.27   | 4.6E-03 |
| BF3098 | putative anti-sigma factor                                                       | 17.7   | 18.6   | 20.0   | 22.9   | 25.4   | 26.6   | 1.33   | 1.8E-02 |
| BF3099 | putative sigma factor                                                            | 87.4   | 81.3   | 84.5   | 82.0   | 85.2   | 86.0   | 1.00   | 1.0E+00 |
| BF3100 | putative exported amylase                                                        | 212.5  | 229.1  | 207.2  | 253.2  | 244.2  | 243.7  | 1.14   | 3.1E-02 |
| ruvC   | Holliday junction resolvase                                                      | 106.4  | 119.8  | 125.8  | 159.9  | 145.9  | 181.5  | 1.38   | 3.2E-02 |
| BF3102 | hypothetical protein                                                             | 120.6  | 103.4  | 96.9   | 186.1  | 158.1  | 182.3  | 1.64   | 1.1E-02 |
| BFt44  | tRNA-Ala-GGC                                                                     | 21.5   | 17.8   | 28.9   | 18.1   | 11.0   | 43.5   | 0.92   | 8.9E-01 |
| BF3103 | hypothetical protein                                                             | 19.5   | 18.3   | 15.2   | 21.3   | 18.7   | 34.2   | 1.36   | 2.6E-01 |
| pheS   | phenylalanyl-tRNA synthetase alpha subunit                                       | 506.9  | 525.7  | 483.5  | 542.7  | 464.9  | 500.9  | 0.99   | 9.3E-01 |
| BF3105 | putative transport related, membrane protein                                     | 53.2   | 58.8   | 54.5   | 70.1   | 65.9   | 73.4   | 1.26   | 1.5E-02 |
| BF3106 | putative endonuclease                                                            | 34.1   | 34.9   | 36.7   | 89.3   | 77.7   | 72.9   | 2.26   | 1.3E-03 |
| pgk    | phosphoglycerate kinase                                                          | 1669.3 | 1714.1 | 1756.4 | 2252.1 | 2216.4 | 2109.4 | 1.28   | 2.6E-03 |
| BF3108 | hypothetical protein                                                             | 296.4  | 325.9  | 306.4  | 212.3  | 202.6  | 232.3  | 0.70   | 5.9E-03 |
| BF3109 | hypothetical protein                                                             | 23.8   | 25.0   | 21.9   | 25.1   | 18.1   | 24.5   | 0.95   | 7.2E-01 |
| BF3110 | hypothetical protein                                                             | 24.6   | 28.8   | 18.8   | 17.4   | 20.4   | 16.3   | 0.76   | 1.8E-01 |
| BF3111 | hypothetical protein                                                             | 268.5  | 270.1  | 186.3  | 63.4   | 62.2   | 49.3   | 0.24   | 2.9E-03 |
| BF3112 | hypothetical protein                                                             | 120.4  | 126.6  | 113.5  | 53.8   | 54.5   | 49.5   | 0.44   | 4.6E-04 |
| BF3113 | hypothetical protein                                                             | 86.5   | 90.8   | 96.5   | 61.2   | 62.8   | 63.1   | 0.68   | 1.7E-03 |
| BF3114 | putative endo-beta-galactosidase                                                 | 184.6  | 182.5  | 195.0  | 235.7  | 250.7  | 223.5  | 1.26   | 1.1E-02 |
| BF3115 | putative non ribosome peptide synthase related, AMP-binding protein              | 152.5  | 145.8  | 149.7  | 120.2  | 118.1  | 118.4  | 0.80   | 6.8E-04 |
| BF3116 | putative acyl carrier protein                                                    | 190.2  | 213.2  | 207.9  | 187.2  | 183.3  | 163.7  | 0.87   | 1.0E-01 |
| BF3117 | putative acetyltransferase membrane protein                                      | 119.9  | 135.3  | 126.9  | 100.6  | 108.4  | 101.7  | 0.81   | 1.9E-02 |
| BF3118 | hypothetical protein                                                             | 71.7   | 76.6   | 72.6   | 67.0   | 63.0   | 61.0   | 0.86   | 2.8E-02 |
| BF3119 | putative lipoprotein                                                             | 810.9  | 752.2  | 916.1  | 600.9  | 648.7  | 477.2  | 0.69   | 5.1E-02 |

|        |                                                                               |        |        |        |        |        |        |      |         |
|--------|-------------------------------------------------------------------------------|--------|--------|--------|--------|--------|--------|------|---------|
| maf    | Maf-like protein                                                              | 249.8  | 245.1  | 267.1  | 212.9  | 199.0  | 218.4  | 0.83 | 1.8E-02 |
| BF3121 | putative lipopolysaccharide biosynthesis related protein                      | 61.2   | 51.1   | 51.7   | 96.1   | 91.6   | 101.5  | 1.77 | 3.8E-03 |
| BF3122 | hypothetical protein                                                          | 111.4  | 103.8  | 94.9   | 151.4  | 142.9  | 148.5  | 1.43 | 6.2E-03 |
| BF3123 | hypothetical protein                                                          | 98.6   | 100.9  | 119.6  | 141.6  | 147.8  | 160.6  | 1.41 | 1.9E-02 |
| BF3124 | putative nitroreductase family protein                                        | 144.6  | 147.1  | 131.3  | 176.6  | 158.6  | 191.0  | 1.24 | 5.1E-02 |
| BF3125 | hypothetical protein                                                          | 93.2   | 96.1   | 82.8   | 95.7   | 91.2   | 101.8  | 1.06 | 4.1E-01 |
| BF3126 | hypothetical protein                                                          | 100.1  | 110.1  | 88.5   | 69.5   | 68.9   | 74.5   | 0.72 | 1.8E-02 |
| BF3127 | hypothetical protein                                                          | 671.8  | 736.4  | 673.6  | 860.5  | 869.6  | 791.2  | 1.21 | 2.4E-02 |
| mmdA   | putative methylmalonyl-CoA decarboxylase, alpha-subunit                       | 544.9  | 615.2  | 554.0  | 980.7  | 929.6  | 943.0  | 1.67 | 1.4E-03 |
| BF3129 | hypothetical protein                                                          | 591.1  | 596.3  | 551.1  | 1056.1 | 940.2  | 886.0  | 1.65 | 3.7E-03 |
| bcc    | putative biotin carboxyl carrier protein                                      | 831.2  | 832.0  | 722.8  | 1117.2 | 1033.3 | 930.2  | 1.29 | 4.2E-02 |
| mmdB   | putative methylmalonyl-CoA decarboxylase, beta subunit                        | 853.8  | 950.6  | 847.7  | 1135.5 | 1121.9 | 1017.0 | 1.23 | 2.9E-02 |
| BF3132 | hypothetical protein                                                          | 10.1   | 8.5    | 9.8    | 28.8   | 27.9   | 24.4   | 2.87 | 9.6E-04 |
| BF3133 | hypothetical protein                                                          | 2.6    | 5.2    | 4.1    | 9.4    | 10.0   | 8.9    | 2.48 | 2.6E-02 |
| BF3134 | putative alpha-amylase precursor                                              | 51.2   | 56.7   | 44.4   | 12.0   | 10.9   | 12.7   | 0.23 | 5.8E-04 |
| BF3135 | putative MarR-family transcriptional regulator                                | 26.0   | 20.4   | 18.1   | 25.0   | 14.8   | 32.6   | 1.08 | 8.2E-01 |
| BF3136 | putative HlyD-family secretion protein                                        | 22.0   | 22.8   | 19.1   | 30.1   | 20.7   | 32.0   | 1.28 | 2.3E-01 |
| BF3137 | putative transport-related membrane protein                                   | 12.2   | 15.1   | 10.3   | 9.3    | 11.4   | 11.9   | 0.87 | 4.3E-01 |
| fba    | fructose-bisphosphate aldolase                                                | 3667.2 | 3822.3 | 4077.1 | 4460.5 | 4545.0 | 4256.8 | 1.15 | 3.8E-02 |
| BF3139 | hypothetical protein                                                          | 66.1   | 48.4   | 45.9   | 40.3   | 33.4   | 72.0   | 0.87 | 6.8E-01 |
| rpmE   | 50S ribosomal protein L31                                                     | 3405.8 | 3669.6 | 3845.2 | 2870.2 | 3016.5 | 2726.6 | 0.79 | 1.6E-02 |
| BF3141 | hypothetical protein                                                          | 32.1   | 28.9   | 31.3   | 5.5    | 5.6    | 4.4    | 0.17 | 3.7E-04 |
| BF3142 | hypothetical protein                                                          | 70.1   | 75.2   | 57.4   | 444.3  | 351.6  | 499.1  | 6.36 | 9.7E-04 |
| BF3143 | conserved hypothetical lipoprotein                                            | 5.2    | 5.2    | 5.0    | 6.3    | 6.4    | 6.4    | 1.24 | 1.1E-03 |
| BF3144 | putative lipoprotein                                                          | 66.3   | 72.7   | 64.3   | 27.5   | 23.5   | 27.8   | 0.39 | 9.2E-04 |
| BF3145 | hypothetical protein                                                          | 68.4   | 85.3   | 75.3   | 26.0   | 26.0   | 28.4   | 0.35 | 8.6E-04 |
| BF3146 | hypothetical protein                                                          | 119.3  | 143.7  | 133.2  | 34.0   | 35.8   | 33.5   | 0.26 | 2.7E-04 |
| BF3147 | putative LacI-family transcriptional regulator                                | 49.7   | 47.9   | 36.9   | 29.8   | 25.3   | 35.3   | 0.67 | 7.0E-02 |
| BF3148 | hypothetical protein                                                          | 36.2   | 47.3   | 32.6   | 53.8   | 42.7   | 80.2   | 1.49 | 1.9E-01 |
| BF3149 | putative glycosyl hydrolase                                                   | 49.6   | 54.1   | 40.8   | 79.6   | 73.2   | 92.6   | 1.70 | 1.9E-02 |
| BF3150 | putative conserved lipoprotein                                                | 91.2   | 88.2   | 80.3   | 70.1   | 58.1   | 74.8   | 0.78 | 7.0E-02 |
| BF3151 | putative AcrB/AcrD/AcrF family membrane protein                               | 132.9  | 135.3  | 102.0  | 90.2   | 77.5   | 97.4   | 0.72 | 7.3E-02 |
| BF3152 | hypothetical protein                                                          | 146.1  | 147.5  | 118.1  | 102.2  | 85.6   | 95.9   | 0.69 | 2.9E-02 |
| BF3153 | hypothetical protein                                                          | 5.3    | 6.4    | 5.9    | 4.5    | 4.9    | 6.3    | 0.89 | 4.2E-01 |
| BF3154 | phosphoribosylformylglycinamide synthase                                      | 412.5  | 429.6  | 405.4  | 425.6  | 393.4  | 422.4  | 0.99 | 9.0E-01 |
| BF3155 | putative two-component system sensor kinase/response regulator fusion protein | 135.8  | 133.0  | 132.6  | 120.4  | 119.0  | 109.8  | 0.87 | 2.2E-02 |
| BF3156 | putative chromate transport protein                                           | 75.4   | 78.8   | 72.6   | 78.5   | 71.9   | 84.8   | 1.04 | 6.2E-01 |
| BF3157 | putative chromate transport membrane protein                                  | 150.4  | 133.0  | 140.2  | 148.0  | 126.9  | 132.0  | 0.96 | 5.9E-01 |
| BF3158 | hypothetical protein                                                          | 210.5  | 202.6  | 190.8  | 236.2  | 232.6  | 244.0  | 1.18 | 1.6E-02 |

|        |                                                                                  |        |        |        |        |        |        |      |         |
|--------|----------------------------------------------------------------------------------|--------|--------|--------|--------|--------|--------|------|---------|
| uvrA2  | UvrABC SOS-repair system protein<br>excinuclease A                               | 124.3  | 117.5  | 101.7  | 121.3  | 102.7  | 132.3  | 1.04 | 7.8E-01 |
| BF3160 | hypothetical protein                                                             | 233.1  | 232.8  | 189.1  | 322.7  | 301.6  | 350.1  | 1.49 | 1.9E-02 |
| BF3161 | hypothetical protein                                                             | 59.6   | 50.4   | 63.1   | 104.3  | 86.7   | 114.3  | 1.76 | 1.5E-02 |
| BF3162 | putative carbon starvation-related<br>membrane protein                           | 59.3   | 65.7   | 56.7   | 72.8   | 69.0   | 78.4   | 1.21 | 5.1E-02 |
| BF3163 | hypothetical protein                                                             | 49.7   | 54.6   | 44.7   | 32.2   | 26.6   | 36.0   | 0.63 | 2.6E-02 |
| BF3164 | putative two-component regulator<br>sensor kinase                                | 48.3   | 47.5   | 47.7   | 25.0   | 30.4   | 29.8   | 0.59 | 4.1E-03 |
| BF3165 | hypothetical protein                                                             | 18.3   | 19.0   | 15.2   | 33.2   | 26.3   | 38.3   | 1.85 | 2.0E-02 |
| BF3166 | hypothetical protein                                                             | 260.1  | 291.5  | 251.0  | 229.8  | 193.4  | 254.7  | 0.84 | 1.9E-01 |
| BF3167 | hypothetical protein                                                             | 190.0  | 228.2  | 204.7  | 214.3  | 228.3  | 233.2  | 1.09 | 2.9E-01 |
| nifJ   | putative pyruvate-flavodoxin<br>oxidoreductase                                   | 555.5  | 674.4  | 610.5  | 781.5  | 757.3  | 732.4  | 1.24 | 4.2E-02 |
| BF3169 | hypothetical protein                                                             | 192.9  | 240.6  | 226.7  | 42.1   | 47.4   | 40.6   | 0.20 | 3.9E-04 |
| BF3170 | putative exported glycine betaine-<br>binding protein                            | 248.3  | 301.2  | 264.5  | 31.9   | 31.1   | 42.8   | 0.13 | 5.7E-04 |
| opuAB  | putative glycine betaine transport<br>system permease protein                    | 338.4  | 417.5  | 337.0  | 31.0   | 26.0   | 36.7   | 0.09 | 3.9E-04 |
| opuAA  | putative glycine betaine transport ATP-<br>binding protein                       | 494.6  | 566.1  | 440.5  | 40.1   | 36.3   | 55.3   | 0.09 | 6.2E-04 |
| BF3173 | conserved DNA methyltransferase<br>protein                                       | 6.1    | 3.8    | 6.8    | 17.9   | 14.2   | 21.6   | 3.27 | 1.4E-02 |
| BF3174 | putative two-component system sensor<br>kinase/response regulator fusion protein | 32.8   | 24.4   | 23.8   | 52.2   | 44.1   | 72.9   | 2.07 | 3.2E-02 |
| BF3175 | putative fructokinase                                                            | 53.3   | 48.7   | 55.4   | 219.8  | 202.0  | 225.3  | 4.11 | 1.7E-04 |
| BF3176 | putative sugar transport-related,<br>membrane protein                            | 47.8   | 51.0   | 52.4   | 155.2  | 181.9  | 181.2  | 3.42 | 3.6E-04 |
| scrL   | levanase                                                                         | 39.6   | 41.6   | 41.4   | 131.3  | 116.6  | 138.1  | 3.14 | 3.2E-04 |
| BF3178 | hypothetical protein                                                             | 12.5   | 12.1   | 11.5   | 24.5   | 25.5   | 22.1   | 2.00 | 9.7E-04 |
| BF3179 | hypothetical DNA-binding protein                                                 | 56.8   | 68.3   | 50.6   | 24.4   | 33.2   | 42.2   | 0.56 | 5.7E-02 |
| BF3180 | hypothetical protein                                                             | 1533.4 | 1727.3 | 1689.5 | 873.5  | 950.9  | 1056.1 | 0.58 | 4.5E-03 |
| BF3181 | putative lipoprotein                                                             | 2087.9 | 1975.8 | 2189.7 | 2057.2 | 2353.5 | 2063.0 | 1.03 | 6.3E-01 |
| BF3182 | putative transport-related, membrane<br>protein                                  | 39.9   | 38.8   | 44.5   | 15.7   | 18.2   | 16.8   | 0.41 | 8.7E-04 |
| BF3183 | putative nitroreductase family protein                                           | 106.0  | 120.5  | 99.2   | 77.3   | 74.0   | 70.1   | 0.68 | 1.1E-02 |
| BF3184 | hypothetical protein                                                             | 106.0  | 103.9  | 95.3   | 77.3   | 75.1   | 71.2   | 0.73 | 5.4E-03 |
| BF3185 | conserved hypothetical phospholipase                                             | 89.9   | 89.4   | 78.2   | 90.6   | 85.9   | 84.6   | 1.02 | 8.1E-01 |
| BF3186 | putative Na/H exchanger membrane<br>protein                                      | 234.5  | 234.4  | 227.4  | 99.8   | 114.5  | 119.0  | 0.48 | 1.1E-03 |
| BF3187 | hypothetical protein                                                             | 3.4    | 5.2    | 3.9    | 1.6    | 1.0    | 2.9    | 0.40 | 9.1E-02 |
| BF3188 | putative lipoprotein                                                             | 12.4   | 12.9   | 12.0   | 5.0    | 6.9    | 6.9    | 0.50 | 8.6E-03 |
| BF3189 | hypothetical protein                                                             | 70.2   | 79.5   | 68.8   | 56.7   | 54.4   | 52.6   | 0.75 | 1.2E-02 |
| BF3190 | putative lipoprotein                                                             | 130.8  | 133.8  | 114.6  | 111.5  | 128.1  | 111.0  | 0.92 | 3.8E-01 |
| BF3191 | hypothetical protein                                                             | 214.6  | 218.4  | 211.9  | 172.3  | 176.5  | 193.9  | 0.84 | 2.1E-02 |
| BF3192 | putative transport-related membrane<br>protein                                   | 106.1  | 108.0  | 90.8   | 87.9   | 83.7   | 90.5   | 0.86 | 1.1E-01 |
| BF3193 | putative lipoprotein                                                             | 64.3   | 44.6   | 46.4   | 30.8   | 31.2   | 35.3   | 0.63 | 4.0E-02 |
| BF3194 | putative AraC-family regulatory protein                                          | 18.5   | 15.2   | 16.6   | 21.1   | 26.3   | 21.4   | 1.37 | 4.8E-02 |
| BF3195 | hypothetical protein                                                             | 687.8  | 656.0  | 674.6  | 1062.3 | 1032.8 | 997.4  | 1.53 | 4.8E-04 |

|        |                                                       |        |        |        |        |       |       |      |         |
|--------|-------------------------------------------------------|--------|--------|--------|--------|-------|-------|------|---------|
| BF3196 | putative two-component system, response regulator     | 7.7    | 8.6    | 4.7    | 14.5   | 13.6  | 13.5  | 2.04 | 3.6E-02 |
| BF3197 | putative two component system, sensor protein         | 0.9    | 0.8    | 0.8    | 0.4    | 1.0   | 0.7   | 0.81 | 5.5E-01 |
| BF3198 | hypothetical protein                                  | 9.6    | 7.4    | 9.4    | 7.6    | 5.1   | 4.0   | 0.61 | 1.2E-01 |
| BF3199 | hypothetical protein                                  | 13.5   | 14.5   | 15.3   | 37.3   | 36.7  | 34.8  | 2.51 | 3.1E-04 |
| BF3200 | putative lipoprotein                                  | 14.3   | 16.5   | 14.6   | 35.3   | 33.8  | 34.0  | 2.28 | 5.8E-04 |
| BF3201 | putative lipoprotein                                  | 101.9  | 107.7  | 88.6   | 300.7  | 276.2 | 294.4 | 2.93 | 6.0E-04 |
| BF3202 | putative electron transfer flavoprotein beta-subunit  | 198.7  | 208.3  | 166.9  | 782.0  | 637.9 | 721.1 | 3.73 | 8.8E-04 |
| BF3203 | putative electron transfer flavoprotein alpha-subunit | 143.9  | 168.0  | 155.3  | 780.8  | 745.5 | 688.4 | 4.74 | 1.8E-04 |
| BF3204 | putative acyl-CoA dehydrogenase                       | 209.2  | 241.2  | 209.7  | 1002.8 | 898.1 | 967.5 | 4.35 | 2.1E-04 |
| BF3205 | putative exported beta-galactosidase                  | 86.3   | 91.6   | 80.7   | 209.5  | 198.0 | 207.2 | 2.38 | 3.3E-04 |
| BF3206 | hypothetical protein                                  | 155.0  | 139.0  | 124.6  | 53.6   | 41.3  | 58.1  | 0.36 | 4.2E-03 |
| BF3207 | putative chaperone                                    | 208.9  | 182.5  | 148.9  | 46.5   | 41.2  | 71.5  | 0.29 | 8.9E-03 |
| BF3208 | putative two-component system, sensor kinase          | 59.8   | 67.5   | 55.1   | 19.6   | 20.3  | 26.5  | 0.36 | 3.4E-03 |
| BF3209 | putative sulfatase                                    | 241.7  | 283.4  | 251.4  | 171.3  | 163.3 | 169.2 | 0.65 | 3.9E-03 |
| BF3210 | hypothetical protein                                  | 398.4  | 417.0  | 364.3  | 159.2  | 151.3 | 177.2 | 0.41 | 9.2E-04 |
| BF3211 | hypothetical protein                                  | 8.8    | 8.1    | 9.0    | 23.7   | 31.6  | 23.3  | 3.00 | 2.2E-03 |
| BF3212 | putative aldolase                                     | 102.1  | 102.4  | 90.4   | 135.9  | 139.4 | 143.1 | 1.42 | 4.7E-03 |
| BF3213 | hypothetical protein                                  | 28.0   | 18.2   | 24.0   | 17.5   | 15.4  | 20.0  | 0.76 | 1.9E-01 |
| BF3214 | putative RNA polymerase sigma factor                  | 57.5   | 50.3   | 56.3   | 39.4   | 39.6  | 45.7  | 0.76 | 2.7E-02 |
| BF3215 | hypothetical protein                                  | 142.3  | 147.4  | 141.8  | 138.4  | 148.1 | 127.5 | 0.96 | 4.6E-01 |
| BF3216 | hypothetical protein                                  | 357.7  | 320.5  | 261.7  | 395.6  | 375.9 | 370.2 | 1.22 | 1.4E-01 |
| poxB   | putative pyruvate dehydrogenase [cytochrome]          | 38.1   | 39.7   | 33.9   | 12.8   | 12.9  | 13.2  | 0.35 | 3.2E-04 |
| BF3218 | putative flavoprotein                                 | 142.4  | 111.1  | 102.9  | 105.7  | 107.1 | 149.0 | 1.01 | 9.5E-01 |
| BF3219 | hypothetical protein                                  | 1.9    | 1.6    | 0.5    | 0.5    | 2.3   | 0.5   | 0.67 | 6.4E-01 |
| BF3220 | hypothetical protein                                  | 3.5    | 5.1    | 3.9    | 1.8    | 2.6   | 0.9   | 0.40 | 7.6E-02 |
| BF3221 | hypothetical protein                                  | 30.4   | 23.9   | 24.5   | 12.8   | 18.7  | 11.8  | 0.54 | 3.6E-02 |
| groEL  | chaperonin GroEL                                      | 1787.7 | 1598.9 | 1380.2 | 866.3  | 928.9 | 714.4 | 0.53 | 1.1E-02 |
| groES  | co-chaperonin GroES                                   | 2659.1 | 2477.1 | 1983.6 | 618.7  | 635.3 | 460.7 | 0.24 | 2.2E-03 |
| BF3224 | putative lipoprotein                                  | 6.3    | 8.1    | 6.0    | 1.8    | 1.7   | 1.6   | 0.25 | 1.2E-03 |
| BF3225 | putative lipoprotein                                  | 3.6    | 4.6    | 3.1    | 1.9    | 3.8   | 2.1   | 0.67 | 2.3E-01 |
| BF3226 | putative lipoprotein                                  | 0.5    | 1.7    | 0.5    | 1.0    | 0.9   | 1.0   | 1.35 | 5.8E-01 |
| BF3227 | hypothetical protein                                  | 1.0    | 1.0    | 0.9    | 0.8    | 0.6   | 0.2   | 0.42 | 2.1E-01 |
| BF3228 | putative lipoprotein                                  | 0.6    | 1.7    | 2.2    | 0.6    | 0.5   | 0.6   | 0.41 | 1.3E-01 |
| BF3229 | hypothetical protein                                  | 1.1    | 0.8    | 1.7    | 0.4    | 0.6   | 0.3   | 0.35 | 5.6E-02 |
| BF3230 | hypothetical protein                                  | 22.7   | 30.1   | 25.8   | 10.5   | 16.2  | 12.8  | 0.50 | 2.1E-02 |
| BF3231 | hypothetical protein                                  | 162.4  | 153.2  | 165.0  | 80.0   | 85.2  | 84.4  | 0.52 | 3.2E-04 |
| BF3232 | hypothetical protein                                  | 3.4    | 4.9    | 3.0    | 4.0    | 5.3   | 3.2   | 1.12 | 6.7E-01 |
| BF3233 | putative RNA polymerase sigma factor                  | 5.6    | 2.4    | 4.5    | 2.1    | 4.7   | 3.6   | 0.84 | 7.1E-01 |
| BF3234 | hypothetical protein                                  | 15.4   | 18.2   | 18.3   | 6.4    | 8.8   | 6.3   | 0.41 | 6.2E-03 |
| BF3235 | putative glycosyl transferase                         | 28.9   | 30.1   | 32.0   | 8.4    | 11.0  | 10.1  | 0.32 | 1.1E-03 |
| BF3236 | hypothetical protein                                  | 136.2  | 142.7  | 127.4  | 229.0  | 207.1 | 204.7 | 1.58 | 3.0E-03 |
| BF3237 | conserved exported protein                            | 155.5  | 160.1  | 157.8  | 262.4  | 270.2 | 230.8 | 1.61 | 2.8E-03 |
| hisS   | histidyl-tRNA synthetase                              | 377.9  | 372.1  | 409.8  | 441.2  | 428.6 | 426.5 | 1.12 | 4.5E-02 |
| BF3239 | hypothetical protein                                  | 10.3   | 10.5   | 7.8    | 3.5    | 3.7   | 2.3   | 0.33 | 8.8E-03 |
| BF3240 | putative lipoprotein                                  | 18.5   | 20.2   | 21.2   | 15.9   | 17.5  | 15.1  | 0.81 | 4.4E-02 |

|        |                                                                              |         |         |         |        |        |        |      |         |
|--------|------------------------------------------------------------------------------|---------|---------|---------|--------|--------|--------|------|---------|
| BF3241 | hypothetical protein                                                         | 632.6   | 684.1   | 520.7   | 284.8  | 293.5  | 280.9  | 0.47 | 3.3E-03 |
| BF3242 | putative exported alpha-L-fucosidase protein                                 | 159.0   | 143.8   | 160.2   | 271.2  | 285.7  | 275.3  | 1.80 | 7.7E-04 |
| purA   | adenylosuccinate synthetase                                                  | 490.1   | 423.3   | 463.6   | 494.7  | 515.2  | 542.4  | 1.13 | 1.1E-01 |
| BF3244 | putative iron storage-related regulatory protein                             | 220.5   | 209.6   | 215.8   | 184.3  | 173.4  | 194.2  | 0.85 | 2.5E-02 |
| BF3245 | hypothetical protein                                                         | 62.9    | 53.6    | 52.1    | 38.7   | 43.6   | 41.3   | 0.73 | 2.4E-02 |
| BF3246 | hypothetical protein                                                         | 211.6   | 221.1   | 218.9   | 142.8  | 159.6  | 150.6  | 0.69 | 2.3E-03 |
| BF3247 | putative membrane attached peptidase                                         | 165.2   | 156.9   | 157.7   | 101.4  | 112.4  | 104.9  | 0.66 | 1.6E-03 |
| BF3248 | putative AraC-family regulatory protein                                      | 10592.5 | 10385.4 | 11018.4 | 6969.3 | 8131.2 | 6112.2 | 0.66 | 1.8E-02 |
| recQ2  | putative ATP-dependent DNA helicase                                          | 44.7    | 41.3    | 42.9    | 55.6   | 46.1   | 58.4   | 1.24 | 7.9E-02 |
| BF3250 | putative TPR repeat domain exported protein                                  | 179.7   | 171.1   | 174.2   | 213.8  | 201.9  | 213.1  | 1.20 | 5.3E-03 |
| BF3251 | putative cysteine synthase                                                   | 175.5   | 171.9   | 128.3   | 160.2  | 119.7  | 198.5  | 0.99 | 9.8E-01 |
| BF3252 | putative membrane attached sulfatase protein                                 | 80.7    | 82.6    | 76.6    | 57.2   | 59.6   | 58.5   | 0.73 | 1.4E-03 |
| BF3253 | hypothetical protein                                                         | 44.5    | 43.1    | 41.4    | 72.1   | 73.6   | 67.9   | 1.65 | 7.3E-04 |
| BF3254 | hypothetical protein                                                         | 446.3   | 456.9   | 379.1   | 214.8  | 212.4  | 223.6  | 0.51 | 1.9E-03 |
| BF3255 | hypothetical protein                                                         | 52.7    | 55.2    | 45.1    | 12.7   | 8.9    | 12.9   | 0.22 | 1.9E-03 |
| BF3256 | hypothetical protein                                                         | 211.1   | 186.4   | 188.6   | 40.7   | 44.3   | 37.9   | 0.21 | 2.0E-04 |
| BF3257 | hypothetical protein                                                         | 11.0    | 16.9    | 11.2    | 72.3   | 72.8   | 62.2   | 5.40 | 1.9E-03 |
| BF3258 | hypothetical protein                                                         | 11.1    | 10.7    | 11.2    | 58.4   | 59.7   | 54.9   | 5.24 | 1.7E-05 |
| BF3259 | putative UDP-glucuronic acid epimerase                                       | 237.9   | 239.9   | 251.2   | 152.0  | 162.7  | 144.2  | 0.63 | 1.6E-03 |
| BF3260 | hypothetical protein                                                         | 98.9    | 84.9    | 94.0    | 100.3  | 115.3  | 101.3  | 1.14 | 1.6E-01 |
| BF3261 | putative transport-related, membrane protein                                 | 115.2   | 98.2    | 128.6   | 91.1   | 98.7   | 97.7   | 0.85 | 1.6E-01 |
| BF3262 | putative glycosyl transferase                                                | 270.6   | 227.3   | 291.3   | 187.5  | 200.4  | 156.4  | 0.69 | 4.4E-02 |
| leuB   | putative 3-isopropylmalate dehydrogenase                                     | 479.7   | 449.1   | 514.5   | 170.5  | 162.2  | 153.8  | 0.34 | 3.2E-04 |
| BF3264 | putative alpha-isopropylmalate synthase 2                                    | 314.0   | 299.6   | 339.7   | 70.2   | 79.1   | 76.6   | 0.24 | 1.6E-04 |
| leuD   | putative 3-isopropylmalate dehydratase small subunit                         | 339.5   | 305.2   | 356.4   | 67.1   | 80.2   | 62.7   | 0.21 | 5.2E-04 |
| leuC   | isopropylmalate isomerase large subunit                                      | 311.0   | 251.7   | 270.9   | 53.8   | 64.7   | 59.8   | 0.21 | 4.7E-04 |
| leuA   | putative 2-isopropylmalate synthase 1                                        | 389.2   | 293.8   | 346.9   | 70.2   | 90.3   | 70.7   | 0.22 | 1.3E-03 |
| BF3268 | putative lipoprotein                                                         | 3222.0  | 3659.6  | 3806.3  | 2493.2 | 2686.4 | 2529.9 | 0.72 | 1.1E-02 |
| 5S     |                                                                              | 0.4     | 8.6     | 41.3    | 2.2    | 5.2    | 27.2   | 1.31 | 9.0E-01 |
| 23S    |                                                                              | 3.0     | 2.1     | 2.4     | 6.8    | 2.2    | 10.0   | 2.15 | 2.3E-01 |
| BFt45  | tRNA-Ala-TGC                                                                 | 87.0    | 97.6    | 97.6    | 47.1   | 45.1   | 95.3   | 0.62 | 1.8E-01 |
| BFt46  | tRNA-Ile-GAT                                                                 | 158.9   | 177.9   | 180.8   | 63.0   | 65.0   | 113.6  | 0.45 | 3.1E-02 |
| 16S    |                                                                              | 672.5   | 32.3    | 99.0    | 90.9   | 32.3   | 230.2  | 0.68 | 7.8E-01 |
| BF3269 | hypothetical protein                                                         | 212.1   | 195.1   | 172.1   | 177.9  | 179.7  | 260.5  | 1.05 | 7.8E-01 |
| BF3270 | hypothetical protein                                                         | 0.0     | 0.0     | 0.0     | 0.0    | 0.0    | 0.0    |      |         |
| BF3271 | putative bacterioferritin-related protein                                    | 321.9   | 378.3   | 374.6   | 46.0   | 41.0   | 52.8   | 0.13 | 2.9E-04 |
| sppA   | putative protease IV                                                         | 135.6   | 132.7   | 136.1   | 148.0  | 158.9  | 146.3  | 1.12 | 2.9E-02 |
| BF3273 | putative tetraacyldisaccharide kinase (lipid A biosynthesis) related protein | 78.3    | 75.5    | 82.0    | 124.6  | 123.4  | 98.1   | 1.46 | 2.2E-02 |
| punA   | purine nucleoside phosphorylase                                              | 175.0   | 165.6   | 155.4   | 274.5  | 267.1  | 233.7  | 1.56 | 6.0E-03 |



|        |                                                                               |       |       |       |       |       |       |      |         |
|--------|-------------------------------------------------------------------------------|-------|-------|-------|-------|-------|-------|------|---------|
| BF3275 | putative thiamine monophosphate kinase                                        | 278.4 | 278.0 | 283.1 | 305.2 | 314.2 | 285.4 | 1.08 | 1.0E-01 |
| BF147  | tRNA-Phe-GAA                                                                  | 44.7  | 68.1  | 37.3  | 34.4  | 22.4  | 144.9 | 0.99 | 9.9E-01 |
| BF3278 | hypothetical protein                                                          | 49.9  | 50.7  | 56.2  | 61.7  | 95.2  | 57.8  | 1.34 | 2.0E-01 |
| BF3279 | hypothetical protein                                                          | 90.4  | 92.5  | 100.2 | 130.1 | 153.4 | 118.8 | 1.41 | 2.7E-02 |
| BF3280 | hypothetical protein                                                          | 0.6   | 0.0   | 0.0   | 1.7   | 0.7   | 0.0   | 1.81 |         |
| BF3281 | hypothetical protein                                                          | 0.0   | 0.0   | 1.3   | 0.6   | 1.4   | 0.0   | 0.67 |         |
| BF3282 | hypothetical protein                                                          | 0.5   | 0.3   | 0.0   | 0.0   | 0.0   | 0.0   |      |         |
| BF3283 | putative transposon-related/mobilisation protein                              | 0.2   | 0.4   | 0.4   | 0.0   | 0.2   | 0.3   | 0.89 | 8.1E-01 |
| bmgB   | mobilization protein                                                          | 0.0   | 0.5   | 0.5   | 0.0   | 0.0   | 0.9   | 1.77 |         |
| bmgA   | mobilization protein                                                          | 0.2   | 0.0   | 0.2   | 0.0   | 0.0   | 0.4   | 1.83 |         |
| BF3286 | hypothetical protein                                                          | 1.2   | 0.5   | 0.3   | 0.0   | 0.0   | 0.2   | 0.42 |         |
| BF3287 | hypothetical protein                                                          | 3.5   | 5.8   | 7.7   | 2.4   | 1.2   | 1.4   | 0.29 | 3.4E-02 |
| BF3288 | hypothetical protein                                                          | 7.6   | 8.0   | 7.9   | 2.4   | 3.4   | 2.8   | 0.36 | 2.8E-03 |
| BF3289 | hypothetical protein                                                          | 20.8  | 15.9  | 23.1  | 13.0  | 14.7  | 15.5  | 0.73 | 9.7E-02 |
| BF3290 | putative AraC-family regulatory protein                                       | 48.3  | 50.1  | 51.7  | 40.1  | 48.7  | 39.6  | 0.85 | 1.3E-01 |
| BF3291 | hypothetical protein                                                          | 63.4  | 59.9  | 72.6  | 52.9  | 59.9  | 47.2  | 0.82 | 1.3E-01 |
| BF3292 | hypothetical protein                                                          | 61.4  | 68.0  | 68.5  | 61.4  | 59.6  | 47.7  | 0.85 | 1.9E-01 |
| BF3293 | hypothetical protein                                                          | 79.6  | 79.3  | 69.8  | 68.2  | 75.7  | 50.1  | 0.84 | 3.2E-01 |
| BF3294 | hypothetical protein                                                          | 20.3  | 20.6  | 30.7  | 51.2  | 55.2  | 40.6  | 2.08 | 2.4E-02 |
| BF3295 | hypothetical protein                                                          | 48.6  | 40.9  | 45.8  | 73.3  | 74.9  | 56.7  | 1.51 | 3.3E-02 |
| BF3296 | hypothetical protein                                                          | 36.7  | 40.8  | 41.8  | 58.8  | 59.6  | 46.1  | 1.37 | 4.9E-02 |
| BF3297 | hypothetical protein                                                          | 31.5  | 39.1  | 41.4  | 22.8  | 23.0  | 20.9  | 0.60 | 1.2E-02 |
| BF3298 | putative acetyltransferase                                                    | 15.3  | 9.9   | 11.2  | 20.4  | 27.5  | 22.0  | 1.93 | 2.8E-02 |
| BF3299 | putative nitroreductase family protein                                        | 18.7  | 20.6  | 19.0  | 30.8  | 32.8  | 30.2  | 1.61 | 1.5E-03 |
| BF3300 | putative AraC-family regulatory protein                                       | 35.9  | 32.6  | 38.9  | 27.7  | 32.1  | 28.2  | 0.82 | 7.4E-02 |
| BF3301 | putative two-component system sensor kinase/response regulator fusion protein | 9.3   | 10.1  | 10.7  | 18.3  | 20.4  | 15.1  | 1.77 | 1.1E-02 |
| BF3302 | hypothetical protein                                                          | 4.7   | 3.7   | 4.7   | 12.6  | 15.3  | 11.4  | 3.01 | 3.3E-03 |
| BF3303 | hypothetical protein                                                          | 30.9  | 22.9  | 26.0  | 44.8  | 40.3  | 40.6  | 1.58 | 1.8E-02 |
| BF3304 | hypothetical protein                                                          | 11.5  | 11.3  | 10.1  | 14.1  | 17.3  | 15.3  | 1.41 | 2.0E-02 |
| BF3305 | putative lipoprotein                                                          | 29.7  | 18.8  | 22.6  | 30.8  | 30.2  | 26.4  | 1.25 | 2.5E-01 |
| BF3306 | hypothetical protein                                                          | 1.4   | 0.7   | 0.4   | 2.0   | 1.6   | 1.9   | 2.46 | 1.0E-01 |
| BF3307 | hypothetical protein                                                          | 1.7   | 1.8   | 1.2   | 2.2   | 2.8   | 2.5   | 1.60 | 6.6E-02 |
| BF3308 | putative membrane attached hydrolase                                          | 1.3   | 0.5   | 1.1   | 1.5   | 1.2   | 0.8   | 1.30 | 5.8E-01 |
| BF3309 | putative acetyltransferase                                                    | 35.1  | 32.5  | 30.1  | 29.3  | 25.6  | 21.2  | 0.77 | 1.1E-01 |
| BF3310 | putative transport-related membrane protein                                   | 10.0  | 8.5   | 12.1  | 4.8   | 4.6   | 6.7   | 0.53 | 3.1E-02 |
| BF3311 | hypothetical protein                                                          | 290.3 | 318.0 | 297.1 | 60.9  | 45.0  | 42.4  | 0.16 | 7.2E-04 |
| BF3312 | uracil-DNA glycosylase                                                        | 62.3  | 57.8  | 70.0  | 51.7  | 48.4  | 38.8  | 0.73 | 6.4E-02 |
| BF3313 | putative AraC-family regulatory protein                                       | 9.7   | 10.3  | 11.8  | 12.7  | 17.1  | 14.2  | 1.38 | 6.5E-02 |
| BF3314 | putative lipoprotein                                                          | 16.1  | 15.6  | 15.7  | 9.3   | 10.7  | 9.0   | 0.61 | 3.5E-03 |
| BF3315 | hypothetical protein                                                          | 178.5 | 186.4 | 165.5 | 86.7  | 93.6  | 74.8  | 0.48 | 2.7E-03 |
| BF3316 | hypothetical protein                                                          | 182.7 | 194.9 | 235.3 | 154.6 | 178.5 | 143.7 | 0.78 | 1.0E-01 |
| BF3317 | hypothetical protein                                                          | 351.4 | 357.2 | 418.3 | 437.3 | 502.6 | 394.3 | 1.18 | 1.9E-01 |
| BF3318 | hypothetical protein                                                          | 105.6 | 110.0 | 111.4 | 30.8  | 31.0  | 23.9  | 0.26 | 7.5E-04 |
| BF3319 | hypothetical protein                                                          | 261.1 | 279.9 | 293.6 | 66.2  | 68.3  | 54.3  | 0.23 | 4.8E-04 |
| hdhA   | putative 7-alpha-hydroxysteroid dehydrogenase (bile acid catabolism)          | 112.9 | 118.6 | 108.4 | 13.3  | 11.5  | 13.2  | 0.11 | 5.0E-05 |

|           |                                                                               |       |       |       |       |       |       |      |         |
|-----------|-------------------------------------------------------------------------------|-------|-------|-------|-------|-------|-------|------|---------|
| BF3321    | putative lipoprotein                                                          | 0.9   | 0.9   | 1.2   | 0.7   | 0.5   | 0.8   | 0.64 | 1.2E-01 |
| BF3322    | hypothetical protein                                                          | 0.9   | 0.7   | 0.3   | 0.6   | 0.4   | 0.9   | 0.97 | 9.5E-01 |
| BF3323    | hypothetical protein                                                          | 1.5   | 1.0   | 1.1   | 0.0   | 0.0   | 0.5   | 0.40 |         |
| BF3324    | hypothetical protein                                                          | 0.3   | 0.3   | 0.6   | 0.5   | 0.0   | 0.3   | 1.02 | 9.8E-01 |
| BF3325    | putative lipoprotein                                                          | 0.6   | 0.6   | 0.7   | 0.3   | 0.3   | 0.5   | 0.57 | 4.2E-02 |
| BF3326    | putative lipoprotein                                                          | 0.8   | 0.9   | 0.7   | 0.3   | 0.2   | 0.3   | 0.35 | 2.5E-03 |
| BF3327    | putative lipoprotein                                                          | 0.6   | 0.6   | 0.3   | 0.5   | 0.1   | 0.3   | 0.50 | 2.7E-01 |
| BF3328    | putative lipoprotein                                                          | 1.0   | 1.7   | 0.6   | 0.4   | 0.5   | 0.2   | 0.31 | 6.5E-02 |
| BF3330    | hypothetical protein                                                          | 1.5   | 0.9   | 1.7   | 0.4   | 0.5   | 0.9   | 0.43 | 9.5E-02 |
| BF3331    | putative AraC-family regulatory protein                                       | 0.4   | 0.6   | 1.1   | 0.6   | 0.9   | 0.2   | 0.71 | 6.3E-01 |
| BF3332    | putative integrase                                                            | 10.2  | 8.4   | 9.1   | 4.7   | 5.1   | 6.7   | 0.59 | 2.7E-02 |
| BF3333    | putative AraC-family regulatory protein                                       | 49.0  | 48.9  | 52.2  | 35.9  | 52.8  | 39.6  | 0.84 | 2.8E-01 |
| pncB      | nicotinate phosphoribosyltransferase                                          | 342.3 | 351.6 | 349.0 | 156.2 | 159.5 | 152.5 | 0.45 | 2.2E-05 |
| BF3335    | hypothetical protein                                                          | 15.9  | 20.1  | 22.0  | 26.4  | 29.2  | 19.6  | 1.29 | 2.4E-01 |
| BF3336    | putative K <sup>+</sup> transport related membrane protein                    | 24.9  | 27.8  | 25.6  | 8.6   | 8.4   | 11.2  | 0.36 | 2.3E-03 |
| Cobalamin | RF00174                                                                       | 581.5 | 621.1 | 446.9 | 254.7 | 130.0 | 323.9 | 0.41 | 6.2E-02 |
| accC2     | putative biotin carboxylase 2                                                 | 225.8 | 255.3 | 207.1 | 110.2 | 73.1  | 130.6 | 0.44 | 2.5E-02 |
| BF3338    | putative bioin-requiring protein                                              | 179.6 | 189.9 | 152.8 | 97.5  | 63.2  | 103.1 | 0.50 | 2.9E-02 |
| BF3339    | putative carboxyl transferase                                                 | 292.5 | 383.0 | 289.2 | 158.7 | 120.0 | 183.6 | 0.48 | 2.0E-02 |
| BF3340    | hypothetical protein                                                          | 5.3   | 8.1   | 4.0   | 3.5   | 4.0   | 7.6   | 0.85 | 6.8E-01 |
| BF3342    | putative exported beta-lactamase protein                                      | 62.2  | 61.3  | 55.1  | 36.6  | 28.4  | 39.0  | 0.58 | 1.6E-02 |
| impDH     | inositol-5-monophosphate dehydrogenase                                        | 212.6 | 207.8 | 181.2 | 221.6 | 190.6 | 242.0 | 1.09 | 4.7E-01 |
| BF3345    | hypothetical protein                                                          | 36.1  | 30.6  | 26.3  | 15.1  | 10.6  | 19.4  | 0.47 | 3.7E-02 |
| BF3346    | hypothetical protein                                                          | 177.2 | 227.0 | 148.6 | 20.7  | 18.3  | 17.4  | 0.10 | 6.0E-04 |
| BF3347    | putative AraC-family regulatory protein                                       | 22.9  | 20.0  | 20.4  | 13.0  | 12.1  | 12.8  | 0.60 | 2.3E-03 |
| BF3348    | putative transport-related, exported protein                                  | 0.8   | 1.7   | 0.5   | 0.2   | 0.0   | 0.6   | 0.34 | 3.3E-01 |
| BF3349    | putative multidrug resistance/siderophore transport related, membrane protein | 2.3   | 2.6   | 1.5   | 1.6   | 1.5   | 2.2   | 0.84 | 5.0E-01 |
| BF3350    | putative transport related, lipoprotein                                       | 5.4   | 6.4   | 4.9   | 5.3   | 3.9   | 7.7   | 0.97 | 9.2E-01 |
| BF3351    | putative cysteine biosynthesis related protein                                | 305.7 | 314.3 | 276.5 | 383.3 | 319.3 | 387.4 | 1.21 | 9.4E-02 |
| BF3352    | putative cell wall biosynthesis related protein                               | 26.3  | 21.5  | 16.4  | 24.9  | 20.8  | 32.7  | 1.22 | 4.2E-01 |
| BF3353    | hypothetical protein                                                          | 93.7  | 106.1 | 74.7  | 102.6 | 96.1  | 105.8 | 1.12 | 4.2E-01 |
| BF3354    | hypothetical protein                                                          | 123.9 | 136.7 | 105.6 | 91.1  | 77.8  | 106.0 | 0.75 | 1.1E-01 |
| BF3355    | hypothetical protein                                                          | 27.4  | 37.0  | 23.6  | 2.5   | 4.6   | 5.1   | 0.14 | 5.3E-03 |
| BF3356    | hypothetical protein                                                          | 67.1  | 74.1  | 60.5  | 12.7  | 22.9  | 15.3  | 0.25 | 5.4E-03 |
| BF3357    | hypothetical protein                                                          | 28.8  | 30.6  | 22.8  | 18.1  | 22.5  | 16.3  | 0.69 | 7.9E-02 |
| BF3358    | putative permease/membrane protein                                            | 11.3  | 9.6   | 10.2  | 2.0   | 1.1   | 1.1   | 0.13 | 2.5E-03 |
| BF3360    | putative chaperone/membrane protein                                           | 57.7  | 63.1  | 45.9  | 62.8  | 51.4  | 64.6  | 1.08 | 6.4E-01 |
| BF3361    | putative hydrolase                                                            | 46.2  | 43.4  | 41.9  | 43.1  | 35.1  | 58.9  | 1.02 | 9.3E-01 |
| BF3362    | putative lipoprotein                                                          | 18.2  | 19.1  | 11.8  | 3.3   | 3.3   | 4.7   | 0.23 | 5.5E-03 |
| BF3363    | hypothetical protein                                                          | 46.3  | 56.8  | 45.7  | 8.3   | 7.6   | 14.5  | 0.20 | 5.6E-03 |
| BF3364    | putative two-component system, sensor kinase                                  | 307.7 | 312.8 | 296.7 | 56.6  | 55.9  | 67.6  | 0.20 | 2.0E-04 |

|        |                                                                      |        |       |       |       |       |       |      |         |
|--------|----------------------------------------------------------------------|--------|-------|-------|-------|-------|-------|------|---------|
| BF3365 | putative metal transport-related, exported protein                   | 7.9    | 8.7   | 7.4   | 2.9   | 2.4   | 3.6   | 0.37 | 5.3E-03 |
| BF3366 | hypothetical protein                                                 | 13.1   | 13.7  | 13.0  | 5.2   | 4.6   | 7.1   | 0.42 | 7.5E-03 |
| BF3368 | putative copper/silver resistance-related transport membrane protein | 25.5   | 29.2  | 25.5  | 5.7   | 5.3   | 7.0   | 0.22 | 7.3E-04 |
| BF3369 | hypothetical protein                                                 | 249.6  | 267.4 | 249.7 | 131.1 | 143.5 | 158.1 | 0.56 | 2.7E-03 |
| BF3370 | putative peptidoglycan biosynthesis-related protein                  | 54.7   | 61.0  | 59.8  | 92.6  | 98.9  | 80.1  | 1.54 | 1.0E-02 |
| BF3371 | putative ion transport related, membrane protein                     | 90.5   | 104.6 | 94.0  | 41.7  | 49.5  | 46.9  | 0.48 | 1.9E-03 |
| BF3372 | hypothetical protein                                                 | 27.7   | 23.6  | 25.2  | 27.2  | 28.6  | 28.3  | 1.10 | 1.7E-01 |
| BF3373 | hypothetical protein                                                 | 13.3   | 16.1  | 18.3  | 22.0  | 24.2  | 14.6  | 1.26 | 3.5E-01 |
| BF3374 | hypothetical protein                                                 | 40.6   | 44.6  | 41.5  | 35.2  | 34.2  | 33.1  | 0.81 | 9.2E-03 |
| BF3375 | hypothetical protein                                                 | 23.5   | 21.6  | 31.1  | 27.9  | 29.8  | 30.6  | 1.17 | 3.0E-01 |
| BF3376 | hypothetical protein                                                 | 50.5   | 42.0  | 53.6  | 50.3  | 59.9  | 52.7  | 1.12 | 3.5E-01 |
| BF3377 | hypothetical protein                                                 | 107.2  | 108.7 | 103.2 | 111.3 | 129.6 | 108.3 | 1.09 | 2.7E-01 |
| BF3378 | bifunctional methionine sulfoxide reductase A/B protein              | 474.6  | 513.3 | 499.0 | 189.6 | 199.4 | 177.5 | 0.38 | 2.6E-04 |
| BF3380 | hypothetical protein                                                 | 69.8   | 63.7  | 67.5  | 20.3  | 19.1  | 31.4  | 0.34 | 7.6E-03 |
| BF3381 | putative amino acid transport related, membrane protein              | 66.5   | 65.0  | 67.7  | 28.1  | 26.4  | 25.9  | 0.40 | 1.1E-04 |
| BF3382 | hypothetical protein                                                 | 360.4  | 332.5 | 353.0 | 364.6 | 353.3 | 327.7 | 1.00 | 9.9E-01 |
| BF3383 | hypothetical protein                                                 | 208.1  | 227.5 | 188.7 | 109.8 | 120.9 | 103.7 | 0.54 | 3.6E-03 |
| BF3384 | putative xanthine/uracyl permease, membrane protein                  | 97.1   | 92.1  | 91.1  | 83.1  | 89.4  | 78.4  | 0.89 | 9.2E-02 |
| BF3385 | hypothetical protein                                                 | 33.6   | 28.9  | 34.6  | 33.5  | 31.5  | 26.3  | 0.94 | 5.9E-01 |
| BF3386 | hypothetical protein                                                 | 60.9   | 60.3  | 43.4  | 100.7 | 88.1  | 92.2  | 1.73 | 2.2E-02 |
| BF3387 | putative ArsC family related protein                                 | 146.5  | 158.0 | 160.3 | 283.5 | 304.1 | 248.7 | 1.79 | 3.5E-03 |
| BF148  | tRNA-Trp-CCA                                                         | 0.0    | 0.0   | 0.0   | 0.0   | 0.0   | 0.0   |      |         |
| BF3388 | hypothetical protein                                                 | 40.3   | 34.3  | 30.2  | 37.0  | 32.5  | 41.5  | 1.06 | 6.8E-01 |
| BF3389 | putative RNA polymerase sigma factor                                 | 24.2   | 21.5  | 20.9  | 35.1  | 37.2  | 35.0  | 1.61 | 2.8E-03 |
| BF3390 | hypothetical protein                                                 | 30.6   | 24.9  | 28.7  | 55.0  | 47.0  | 46.1  | 1.76 | 7.5E-03 |
| BF3391 | putative cytidyltransferase                                          | 26.6   | 28.4  | 31.5  | 42.5  | 47.4  | 42.3  | 1.53 | 7.3E-03 |
| BF3392 | hypothetical protein                                                 | 43.5   | 51.1  | 39.9  | 54.7  | 58.8  | 50.8  | 1.22 | 1.1E-01 |
| BF3393 | conserved exported hypothetical protein                              | 10.5   | 10.3  | 10.4  | 6.0   | 6.6   | 4.2   | 0.53 | 2.0E-02 |
| BF3394 | hypothetical protein                                                 | 84.6   | 62.6  | 48.7  | 18.1  | 23.3  | 17.2  | 0.30 | 8.8E-03 |
| BF3395 | pyridoxine kinase                                                    | 203.7  | 209.0 | 201.4 | 142.1 | 143.7 | 146.2 | 0.70 | 2.0E-04 |
| BF3396 | hypothetical protein                                                 | 180.1  | 188.3 | 164.8 | 117.0 | 109.0 | 109.3 | 0.63 | 2.5E-03 |
| BF3397 | hypothetical protein                                                 | 244.4  | 231.8 | 222.2 | 138.5 | 133.0 | 139.8 | 0.59 | 6.3E-04 |
| BF3398 | hypothetical protein                                                 | 376.0  | 401.2 | 386.2 | 166.3 | 170.9 | 152.8 | 0.42 | 3.0E-04 |
| BF3399 | hypothetical protein                                                 | 124.7  | 117.9 | 116.4 | 78.1  | 77.1  | 78.4  | 0.65 | 4.2E-04 |
| BF3400 | putative 6-pyruvoyl tetrahydropterin synthase                        | 126.1  | 116.1 | 112.0 | 108.0 | 100.6 | 98.1  | 0.87 | 5.9E-02 |
| BF3401 | hypothetical protein                                                 | 64.4   | 64.2  | 73.3  | 81.4  | 63.1  | 62.7  | 1.02 | 8.8E-01 |
| BF3402 | hypothetical protein                                                 | 11.0   | 13.6  | 14.4  | 9.6   | 5.4   | 8.2   | 0.58 | 7.7E-02 |
| BF3403 | hypothetical protein                                                 | 248.4  | 261.5 | 240.6 | 153.4 | 138.3 | 168.2 | 0.61 | 4.8E-03 |
| BF3404 | putative copper homeostasis protein                                  | 52.7   | 48.4  | 47.3  | 76.1  | 58.4  | 69.6  | 1.37 | 4.0E-02 |
| BF3405 | hypothetical protein                                                 | 720.7  | 767.1 | 719.0 | 539.2 | 532.7 | 611.4 | 0.76 | 1.3E-02 |
| BF3406 | hypothetical protein                                                 | 703.4  | 640.3 | 628.5 | 718.4 | 708.8 | 605.1 | 1.03 | 7.4E-01 |
| BF3407 | hypothetical protein                                                 | 1029.3 | 911.6 | 878.3 | 931.7 | 881.1 | 870.6 | 0.95 | 4.9E-01 |

|                        |                                                                        |            |            |            |              |              |              |               |                |
|------------------------|------------------------------------------------------------------------|------------|------------|------------|--------------|--------------|--------------|---------------|----------------|
| maeB                   | putative NADP-dependent malic enzyme                                   | 528.6      | 521.2      | 451.3      | 508.0        | 497.6        | 496.7        | 1.00          | 9.6E-01        |
| gdhB2                  | glutamate dehydrogenase                                                | 4803.3     | 3806.3     | 4197.6     | 964.7        | 981.8        | 1133.1       | 0.24          | 6.2E-04        |
| BF3410                 | putative RNA polymerase sigma factor                                   | 4.2        | 3.1        | 4.7        | 55.7         | 57.1         | 39.5         | 12.65         | 8.5E-04        |
| BF3411                 | putative regulatory protein                                            | 8.0        | 11.0       | 10.2       | 138.7        | 132.1        | 144.0        | 14.31         | 1.8E-04        |
|                        | <b>putative outer membrane protein</b>                                 |            |            |            |              |              |              |               |                |
| <b>BF3412 (omp117)</b> | <b>Omp117</b>                                                          | <b>1.3</b> | <b>1.4</b> | <b>1.0</b> | <b>162.2</b> | <b>146.9</b> | <b>149.3</b> | <b>123.73</b> | <b>3.8E-05</b> |
| BF3413                 | hypothetical protein                                                   | 0.9        | 1.2        | 1.7        | 140.2        | 106.1        | 119.5        | 102.17        | 3.0E-04        |
| BF3414                 | hypothetical protein                                                   | 0.5        | 0.7        | 0.0        | 127.4        | 99.9         | 112.4        | 186.03        | 7.7E-04        |
| BF3415                 | putative lipoprotein                                                   | 0.9        | 1.0        | 0.3        | 171.2        | 129.5        | 137.8        | 221.61        | 8.0E-04        |
| BF3416                 | hypothetical protein                                                   | 0.9        | 0.9        | 0.6        | 229.1        | 197.6        | 195.4        | 272.07        | 8.1E-05        |
| BF3417                 | hypothetical protein                                                   | 2.3        | 1.5        | 3.0        | 9.1          | 18.5         | 17.5         | 6.65          | 1.0E-02        |
| BF3418                 | putative DNA methylase                                                 | 165.0      | 127.7      | 157.3      | 136.7        | 159.7        | 109.5        | 0.90          | 5.4E-01        |
| BF3419                 | hypothetical protein                                                   | 118.6      | 110.4      | 121.9      | 114.9        | 128.0        | 106.7        | 0.99          | 9.4E-01        |
| BF3420                 | hypothetical protein                                                   | 54.6       | 54.5       | 65.7       | 51.8         | 71.0         | 42.7         | 0.93          | 7.3E-01        |
| BF3421                 | hypothetical protein                                                   | 12.3       | 13.1       | 14.1       | 8.2          | 12.1         | 10.5         | 0.77          | 1.5E-01        |
| BF3422                 | putative DNA-binding protein                                           | 419.8      | 359.3      | 393.7      | 445.6        | 418.4        | 449.9        | 1.12          | 1.3E-01        |
| BF3423                 | hypothetical protein                                                   | 358.0      | 347.8      | 411.9      | 709.3        | 799.0        | 626.3        | 1.91          | 6.0E-03        |
| BF3424                 | putative lipoprotein                                                   | 1445.7     | 1447.4     | 1566.9     | 2329.6       | 2393.1       | 2058.3       | 1.52          | 5.2E-03        |
| BF3425                 | hypothetical protein                                                   | 157.0      | 152.9      | 166.3      | 132.9        | 149.9        | 129.2        | 0.86          | 7.9E-02        |
| BF3426                 | hypothetical protein                                                   | 228.5      | 237.8      | 252.1      | 218.5        | 247.5        | 201.0        | 0.93          | 3.8E-01        |
| BF3427                 | hypothetical protein                                                   | 546.2      | 479.1      | 471.0      | 388.6        | 371.6        | 351.5        | 0.74          | 1.5E-02        |
| BF3428                 | hypothetical protein                                                   | 412.0      | 426.9      | 412.4      | 357.7        | 366.4        | 431.9        | 0.92          | 3.1E-01        |
| BF3429                 | hypothetical protein                                                   | 356.8      | 275.9      | 280.1      | 194.5        | 202.0        | 243.7        | 0.70          | 5.6E-02        |
| BF3430                 | putative lipoprotein                                                   | 568.6      | 526.7      | 477.7      | 449.6        | 407.6        | 477.0        | 0.85          | 1.1E-01        |
| BF3431                 | hypothetical protein                                                   | 764.6      | 706.3      | 690.2      | 577.7        | 568.4        | 597.4        | 0.81          | 9.5E-03        |
| BF3432                 | hypothetical protein                                                   | 694.8      | 615.7      | 628.7      | 625.1        | 660.2        | 589.8        | 0.97          | 6.1E-01        |
| BF3433                 | hypothetical protein                                                   | 393.9      | 346.3      | 351.8      | 557.6        | 528.3        | 543.5        | 1.49          | 3.2E-03        |
| BF3434                 | hypothetical protein                                                   | 363.1      | 308.4      | 319.5      | 535.4        | 514.8        | 458.1        | 1.52          | 9.9E-03        |
| BF3435                 | hypothetical protein                                                   | 82.4       | 83.7       | 79.9       | 99.4         | 97.5         | 86.1         | 1.15          | 7.1E-02        |
| gdhB                   | glutamate dehydrogenase                                                | 44.2       | 49.1       | 43.9       | 58.1         | 59.1         | 52.9         | 1.24          | 2.7E-02        |
| BF3438                 | putative peptidase                                                     | 270.7      | 241.7      | 260.9      | 334.3        | 342.4        | 306.4        | 1.27          | 1.7E-02        |
| BF3439                 | hypothetical protein                                                   | 11.6       | 10.6       | 11.2       | 11.5         | 13.5         | 13.8         | 1.16          | 1.2E-01        |
| BF3440                 | hypothetical protein                                                   | 11.0       | 9.0        | 10.9       | 10.4         | 9.0          | 8.3          | 0.90          | 3.8E-01        |
| BF3441                 | hypothetical protein                                                   | 1.8        | 0.0        | 0.0        | 0.0          | 0.0          | 0.8          | 0.48          |                |
| BF3442                 | putative polyA polymerase                                              | 53.8       | 49.3       | 42.1       | 38.5         | 38.1         | 50.6         | 0.87          | 3.8E-01        |
| BF3443                 | putative lipoprotein                                                   | 106.2      | 100.4      | 92.9       | 134.9        | 137.4        | 123.8        | 1.32          | 1.3E-02        |
| BF3444                 | hypothetical protein                                                   | 88.3       | 92.2       | 86.0       | 142.3        | 124.3        | 132.1        | 1.49          | 3.3E-03        |
| BF3445                 | hypothetical protein                                                   | 91.5       | 100.9      | 86.5       | 100.3        | 99.5         | 92.8         | 1.05          | 4.6E-01        |
| BF3446                 | putative lipoprotein                                                   | 205.2      | 206.7      | 218.4      | 224.4        | 226.5        | 180.0        | 1.00          | 9.7E-01        |
| BF3447                 | putative peptidase                                                     | 207.5      | 228.4      | 204.5      | 136.4        | 141.5        | 129.3        | 0.64          | 2.3E-03        |
| BF3448                 | hypothetical protein                                                   | 415.1      | 465.3      | 430.1      | 202.5        | 198.4        | 212.3        | 0.47          | 4.3E-04        |
| BF3449                 | cold shock-like protein                                                | 851.2      | 850.9      | 867.9      | 197.5        | 209.2        | 282.1        | 0.26          | 1.6E-03        |
| BF3450                 | hypothetical protein                                                   | 2.5        | 0.0        | 0.0        | 1.2          | 1.4          | 2.4          | 0.64          |                |
| BF3451                 | putative LPS biosynthesis related conserved hypothetical protein       | 12.1       | 4.2        | 10.6       | 6.3          | 4.8          | 7.6          | 0.76          | 5.5E-01        |
| rfbC1                  | putative LPS biosynthesis related dTDP-4-dehydrorhamnose 3,5-epimerase | 17.9       | 18.0       | 14.7       | 10.2         | 7.9          | 11.8         | 0.59          | 3.4E-02        |

|           |                                                                             |        |        |        |       |       |       |      |         |
|-----------|-----------------------------------------------------------------------------|--------|--------|--------|-------|-------|-------|------|---------|
| rffH1     | putative LPS biosynthesis related glucose-1-phosphate thymidyltransferase   | 20.1   | 18.4   | 23.2   | 11.1  | 15.9  | 13.2  | 0.65 | 4.5E-02 |
| BF3454    | putative LPS biosynthesis related glycosyltransferase                       | 17.8   | 15.5   | 17.4   | 8.2   | 10.3  | 8.1   | 0.52 | 6.1E-03 |
| BF3455    | putative LPS biosynthesis related glycosyltransferase                       | 7.9    | 7.6    | 9.0    | 2.9   | 5.4   | 4.8   | 0.52 | 5.6E-02 |
| BF3456    | putative LPS biosynthesis related polysaccharide polymerase                 | 3.8    | 5.4    | 5.8    | 2.5   | 2.3   | 2.0   | 0.46 | 1.5E-02 |
| BF3457    | putative LPS biosynthesis related glycosyltransferase                       | 4.6    | 7.4    | 9.7    | 6.8   | 7.8   | 6.9   | 1.03 | 9.2E-01 |
| BF3458    | putative LPS biosynthesis related glycosyltransferase                       | 7.7    | 10.3   | 11.4   | 6.6   | 7.5   | 6.0   | 0.69 | 8.2E-02 |
| BF3459    | putative LPS biosynthesis related glycosyltransferase                       | 9.5    | 9.5    | 8.8    | 6.5   | 10.1  | 8.4   | 0.89 | 4.8E-01 |
| BF3460    | putative LPS biosynthesis related glycosyltransferase                       | 12.9   | 13.9   | 14.6   | 7.7   | 13.7  | 7.0   | 0.65 | 1.7E-01 |
| BF3461    | hypothetical protein                                                        | 15.2   | 14.4   | 16.6   | 8.8   | 8.5   | 7.6   | 0.54 | 2.2E-03 |
| BF3462    | hypothetical protein                                                        | 10.9   | 9.9    | 11.0   | 10.0  | 7.5   | 6.3   | 0.74 | 1.3E-01 |
| BF3463    | putative LPS biosynthesis related polysaccharide transporter                | 9.3    | 8.9    | 9.5    | 4.1   | 5.0   | 3.9   | 0.47 | 2.8E-03 |
| BF3464    | putative LPS biosynthesis related glycosyltransferase                       | 7.1    | 10.0   | 8.7    | 8.6   | 6.9   | 6.2   | 0.84 | 3.5E-01 |
| uphZ      | putative LPS biosynthesis related transcriptional regulatory protein        | 8.4    | 7.3    | 5.2    | 5.5   | 5.9   | 3.8   | 0.73 | 2.4E-01 |
| uphY      | putative LPS biosynthesis related transcriptional regulatory protein        | 11.1   | 12.9   | 12.2   | 7.7   | 12.1  | 11.9  | 0.86 | 4.5E-01 |
| BF3468    | hypothetical protein                                                        | 5.8    | 3.8    | 2.5    | 2.1   | 1.6   | 2.2   | 0.51 | 1.0E-01 |
| BF3469    | hypothetical protein                                                        | 2.5    | 2.3    | 1.8    | 2.1   | 2.2   | 3.7   | 1.16 | 5.8E-01 |
| BF3470    | hypothetical protein                                                        | 149.4  | 144.5  | 179.8  | 261.5 | 283.4 | 211.7 | 1.59 | 2.8E-02 |
| BF3471    | hypothetical protein                                                        | 221.0  | 152.6  | 190.8  | 249.7 | 292.2 | 230.7 | 1.38 | 1.0E-01 |
| BF3472    | hypothetical protein                                                        | 32.3   | 39.7   | 41.1   | 63.2  | 44.0  | 50.2  | 1.39 | 1.0E-01 |
| BF3473    | hypothetical protein                                                        | 23.6   | 25.5   | 26.0   | 9.2   | 7.8   | 9.7   | 0.35 | 9.3E-04 |
| BF3474    | putative ribose 5-phosphate isomerase                                       | 193.3  | 165.8  | 184.3  | 90.1  | 98.4  | 116.0 | 0.56 | 7.8E-03 |
| BF3475    | hypothetical protein                                                        | 90.6   | 93.2   | 89.3   | 84.0  | 90.5  | 90.6  | 0.97 | 4.1E-01 |
| BF3476    | putative acetyltransferase                                                  | 11.9   | 8.3    | 9.4    | 11.3  | 11.8  | 13.7  | 1.25 | 1.9E-01 |
| BF3477    | putative DNA-binding protein                                                | 27.9   | 20.9   | 23.9   | 68.4  | 66.2  | 50.0  | 2.53 | 6.6E-03 |
| BF3478    | hypothetical protein                                                        | 28.2   | 21.4   | 30.8   | 59.8  | 69.2  | 49.8  | 2.23 | 1.4E-02 |
| BF3479    | hypothetical protein                                                        | 34.6   | 27.5   | 27.4   | 43.0  | 40.1  | 37.1  | 1.35 | 5.0E-02 |
| ruvA      | Holliday junction DNA helicase motor protein                                | 121.1  | 101.3  | 101.0  | 113.1 | 103.2 | 130.2 | 1.07 | 5.6E-01 |
| BF3481    | putative oxidoreductase                                                     | 1262.8 | 1195.6 | 1060.2 | 781.2 | 621.0 | 837.2 | 0.63 | 2.5E-02 |
| BF3482    | putative hemolysin                                                          | 83.5   | 100.9  | 77.0   | 49.6  | 40.2  | 58.5  | 0.56 | 2.8E-02 |
| BF3483    | hypothetical protein                                                        | 29.2   | 25.5   | 9.2    | 12.9  | 7.3   | 12.0  | 0.55 | 2.8E-01 |
| Cobalamin | RF00174                                                                     | 102.4  | 104.0  | 89.3   | 58.5  | 46.2  | 122.7 | 0.70 | 3.7E-01 |
| BF3484    | anaerobic ribonucleoside triphosphate reductase                             | 117.2  | 140.1  | 146.2  | 152.7 | 122.9 | 150.1 | 1.05 | 6.7E-01 |
| BF3485    | putative anaerobic ribonucleoside-triphosphate reductase activating protein | 83.0   | 106.7  | 106.3  | 103.8 | 92.6  | 123.5 | 1.08 | 6.2E-01 |

|        |                                                              |        |        |        |        |        |        |      |         |
|--------|--------------------------------------------------------------|--------|--------|--------|--------|--------|--------|------|---------|
| BF3486 | putative transport-related, membrane protein                 | 21.6   | 26.0   | 16.8   | 8.2    | 6.5    | 8.7    | 0.37 | 8.2E-03 |
| BF3487 | putative aminotransferase                                    | 3.6    | 4.0    | 3.9    | 4.0    | 5.3    | 5.6    | 1.28 | 1.3E-01 |
| BF3488 | putative hydrolase                                           | 2.2    | 1.2    | 1.5    | 1.9    | 1.0    | 2.8    | 1.12 | 8.0E-01 |
| BF3490 | hypothetical protein                                         | 39.6   | 42.1   | 34.8   | 74.3   | 69.2   | 71.9   | 1.85 | 2.3E-03 |
| BF3491 | putative protease                                            | 487.6  | 477.5  | 493.6  | 376.3  | 387.8  | 375.6  | 0.78 | 5.7E-04 |
| BF3492 | 1-deoxy-D-xylulose 5-phosphate reductoisomerase              | 247.7  | 260.1  | 255.1  | 266.4  | 249.6  | 260.4  | 1.02 | 5.7E-01 |
| BF3493 | putative peptidase                                           | 231.8  | 233.9  | 242.4  | 195.0  | 204.3  | 190.7  | 0.83 | 5.7E-03 |
| rimM   | 16S rRNA-processing protein                                  | 203.7  | 200.1  | 214.0  | 219.9  | 203.5  | 221.3  | 1.04 | 3.5E-01 |
| BF3495 | UDP-N-acetylglucosamine 1-carboxyvinyltransferase            | 451.3  | 447.1  | 446.2  | 435.2  | 414.2  | 405.1  | 0.93 | 5.6E-02 |
| BF3496 | hypothetical protein                                         | 356.0  | 394.8  | 382.6  | 379.4  | 402.0  | 343.8  | 0.99 | 9.1E-01 |
| BF3497 | putative glycoprotease family exported protein               | 246.1  | 272.0  | 267.5  | 275.7  | 263.6  | 252.1  | 1.01 | 8.9E-01 |
| BF3499 | hypothetical protein                                         | 451.1  | 392.7  | 412.7  | 446.3  | 402.5  | 387.5  | 0.98 | 8.3E-01 |
| gmk    | guanylate kinase                                             | 373.0  | 403.1  | 414.8  | 328.8  | 319.9  | 331.9  | 0.82 | 1.2E-02 |
| nadD   | nicotinic acid mononucleotide adenyltransferase              | 165.7  | 188.3  | 183.4  | 138.3  | 153.0  | 153.4  | 0.83 | 4.1E-02 |
| BF3502 | putative phosphoesterase                                     | 66.2   | 71.8   | 65.5   | 37.1   | 39.6   | 46.6   | 0.60 | 7.3E-03 |
| BF3503 | putative prenyltransferase                                   | 78.9   | 62.6   | 63.3   | 63.9   | 60.4   | 64.9   | 0.93 | 4.8E-01 |
| rffG   | putative dTDP-glucose 4,6-dehydratase                        | 160.8  | 152.5  | 180.8  | 279.9  | 275.4  | 252.4  | 1.64 | 4.4E-03 |
| rffH2  | putative glucose-1-phosphate thymidyltransferase             | 117.0  | 126.4  | 124.1  | 129.9  | 129.1  | 132.8  | 1.07 | 9.7E-02 |
| BF3506 | putative phosphoesterase                                     | 53.4   | 62.9   | 50.2   | 71.0   | 63.5   | 76.7   | 1.27 | 8.3E-02 |
| ppk    | polyphosphate kinase                                         | 14.5   | 17.5   | 15.0   | 44.2   | 44.5   | 40.7   | 2.76 | 7.6E-04 |
| BF3508 | hypothetical protein                                         | 41.3   | 41.6   | 44.0   | 39.1   | 49.8   | 47.4   | 1.07 | 5.0E-01 |
| BF3509 | putative response regulator                                  | 722.6  | 688.2  | 768.4  | 637.9  | 742.9  | 598.6  | 0.91 | 3.0E-01 |
| BF3510 | putative ABC transport system, ATP-binding protein           | 91.7   | 87.1   | 91.5   | 131.0  | 117.3  | 121.7  | 1.37 | 4.0E-03 |
| BF3511 | putative metal resistance related exported protein           | 15.4   | 17.1   | 18.4   | 84.9   | 72.8   | 95.3   | 4.95 | 5.9E-04 |
| BF3512 | putative metal resistance related transport membrane protein | 30.5   | 32.0   | 31.3   | 67.7   | 63.8   | 69.4   | 2.14 | 1.8E-04 |
| BF3513 | putative outer membrane protein                              | 59.7   | 71.3   | 64.4   | 97.9   | 95.5   | 88.2   | 1.44 | 1.0E-02 |
| BF3514 | hypothetical protein                                         | 40.7   | 38.8   | 34.7   | 35.2   | 31.6   | 39.2   | 0.93 | 4.6E-01 |
| BF3515 | hypothetical protein                                         | 43.2   | 38.6   | 36.3   | 54.3   | 51.1   | 60.5   | 1.40 | 2.0E-02 |
| BF3516 | hypothetical protein                                         | 26.8   | 38.6   | 27.6   | 41.8   | 50.1   | 51.4   | 1.56 | 5.4E-02 |
| BF3517 | hypothetical protein                                         | 52.7   | 57.4   | 53.0   | 109.3  | 94.6   | 103.7  | 1.88 | 1.4E-03 |
| BF3518 | hypothetical protein                                         | 131.0  | 145.5  | 144.3  | 159.5  | 135.1  | 150.0  | 1.06 | 4.8E-01 |
| BF3519 | hypothetical protein                                         | 309.3  | 338.9  | 332.8  | 172.8  | 174.6  | 156.3  | 0.51 | 8.6E-04 |
| BF3520 | putative RNA polymerase sigma factor                         | 193.2  | 183.2  | 163.2  | 120.0  | 113.9  | 150.2  | 0.71 | 4.6E-02 |
| BF3521 | hypothetical protein                                         | 241.7  | 211.0  | 175.5  | 167.7  | 129.4  | 200.1  | 0.79 | 2.6E-01 |
| BF3522 | putative phospholipid biosynthesis related protein           | 108.4  | 86.6   | 99.5   | 59.3   | 59.9   | 81.8   | 0.68 | 6.1E-02 |
| thyB   | thymidylate synthase                                         | 136.1  | 130.6  | 117.1  | 122.9  | 112.6  | 145.6  | 0.99 | 9.3E-01 |
| dfrA   | putative dihydrofolate reductase                             | 111.3  | 122.9  | 114.0  | 116.2  | 114.2  | 131.4  | 1.04 | 5.9E-01 |
| BF3525 | putative AsnC family regulatory protein                      | 456.9  | 477.3  | 491.3  | 602.0  | 565.3  | 546.2  | 1.20 | 1.6E-02 |
| BF3526 | putative lipoprotein                                         | 56.6   | 56.7   | 47.0   | 63.2   | 61.1   | 56.3   | 1.13 | 2.2E-01 |
| BF3527 | hypothetical protein                                         | 6323.5 | 6931.5 | 7184.2 | 7500.8 | 8341.2 | 7450.7 | 1.14 | 1.1E-01 |

|        |                                                    |        |        |        |        |        |        |      |         |
|--------|----------------------------------------------------|--------|--------|--------|--------|--------|--------|------|---------|
| BF3528 | hypothetical protein                               | 6721.0 | 6805.0 | 7652.7 | 7897.2 | 8635.1 | 6909.4 | 1.10 | 3.4E-01 |
| BF3529 | hypothetical protein                               | 3689.8 | 4203.7 | 4551.0 | 5669.4 | 6530.7 | 5475.1 | 1.42 | 2.7E-02 |
| BF3530 | hypothetical protein                               | 4345.2 | 4655.9 | 4983.5 | 6965.1 | 7493.6 | 6239.6 | 1.48 | 1.1E-02 |
| BFt49  | tRNA-Ser-CGA                                       | 118.3  | 168.5  | 88.3   | 138.7  | 132.3  | 265.5  | 1.40 | 3.8E-01 |
| BF3531 | putative DNase related protein                     | 115.1  | 115.9  | 126.3  | 115.8  | 114.4  | 110.5  | 0.95 | 2.9E-01 |
| BF3532 | hypothetical protein                               | 175.2  | 194.8  | 192.9  | 183.2  | 169.5  | 184.3  | 0.95 | 4.1E-01 |
| BF3533 | putative isoprenoid biosynthesis related protein   | 351.1  | 335.1  | 357.1  | 322.8  | 328.1  | 297.1  | 0.91 | 9.0E-02 |
| BF3534 | conserved hypothetical outer membrane protein      | 2991.2 | 2822.2 | 2637.0 | 3158.2 | 2892.0 | 2938.1 | 1.06 | 3.1E-01 |
| cmk    | putative cytidylate kinase                         | 375.4  | 347.4  | 328.6  | 307.8  | 254.6  | 331.4  | 0.85 | 1.8E-01 |
| BF3536 | 4-hydroxy-3-methylbut-2-enyl diphosphate reductase | 122.9  | 126.2  | 124.6  | 121.1  | 114.0  | 113.2  | 0.93 | 6.1E-02 |
| pfkA   | 6-phosphofructokinase                              | 422.9  | 400.8  | 389.8  | 604.0  | 503.5  | 582.7  | 1.39 | 1.4E-02 |
| BF3538 | conserved hypothetical dehydrogenase protein       | 43.2   | 50.1   | 42.7   | 70.7   | 70.2   | 84.1   | 1.65 | 8.7E-03 |
| BF3539 | putative oxidoreductase                            | 51.4   | 44.0   | 42.1   | 72.8   | 64.0   | 98.3   | 1.69 | 3.9E-02 |
| BF3540 | putative membrane dehydrogenase protein            | 72.5   | 70.9   | 69.4   | 60.6   | 66.2   | 66.0   | 0.91 | 6.1E-02 |
| BF3541 | citrate synthase                                   | 387.4  | 413.6  | 398.0  | 267.4  | 265.5  | 241.6  | 0.65 | 1.7E-03 |
| icd    | putative isocitrate dehydrogenase [NADP]           | 276.2  | 293.1  | 244.7  | 167.8  | 149.9  | 178.2  | 0.61 | 7.6E-03 |
| acn    | putative aconitase                                 | 364.4  | 376.6  | 347.7  | 194.6  | 186.8  | 230.2  | 0.56 | 4.0E-03 |
| BF3544 | putative DNA-binding protein                       | 33.3   | 25.9   | 26.9   | 20.2   | 20.2   | 25.9   | 0.77 | 1.2E-01 |
| BF3545 | putative lipoprotein                               | 7.7    | 7.2    | 8.2    | 3.2    | 3.6    | 2.4    | 0.39 | 6.4E-03 |
| BF3546 | putative reductoisomerase                          | 2636.4 | 2895.1 | 2641.9 | 1335.7 | 1308.7 | 1415.0 | 0.50 | 5.2E-04 |
| BF3547 | hypothetical protein                               | 375.2  | 368.3  | 359.4  | 158.9  | 155.1  | 175.4  | 0.44 | 3.7E-04 |
| BF3548 | putative acyl-ACP thioesterase                     | 409.6  | 415.0  | 419.2  | 191.3  | 211.7  | 181.8  | 0.47 | 6.2E-04 |
| BF3549 | putative acetohydroxyacid synthase small subunit   | 449.8  | 453.7  | 461.3  | 203.6  | 235.2  | 187.1  | 0.46 | 1.7E-03 |
| ilvB   | putative acetolactate synthase large subunit       | 387.9  | 387.4  | 333.1  | 189.4  | 171.3  | 210.7  | 0.52 | 4.1E-03 |
| ilvD   | dihydroxy-acid dehydratase                         | 454.9  | 426.4  | 377.6  | 178.0  | 176.1  | 234.8  | 0.46 | 6.8E-03 |
| BF3552 | hypothetical protein                               | 8.1    | 6.4    | 6.6    | 6.7    | 8.7    | 7.8    | 1.10 | 5.0E-01 |
| BF3553 | hypothetical protein                               | 5.7    | 4.5    | 4.8    | 4.0    | 3.4    | 4.6    | 0.80 | 1.6E-01 |
| BF3554 | putative lipoprotein                               | 2.8    | 2.6    | 1.4    | 1.7    | 1.3    | 2.0    | 0.75 | 3.7E-01 |
| BF3555 | putative lipoprotein                               | 3.7    | 1.5    | 2.1    | 1.2    | 1.1    | 2.3    | 0.64 | 3.5E-01 |
| BF3556 | hypothetical protein                               | 2.6    | 2.1    | 1.7    | 1.3    | 2.3    | 0.6    | 0.57 | 2.9E-01 |
| BF3557 | putative AraC-family regulatory protein            | 5.4    | 9.2    | 7.3    | 2.1    | 2.8    | 1.4    | 0.28 | 1.9E-02 |
| BF3558 | putative isomerase                                 | 1361.2 | 1207.1 | 1151.7 | 584.3  | 574.5  | 690.6  | 0.50 | 3.4E-03 |
| BF3559 | putative lipoprotein                               | 80.9   | 60.0   | 67.4   | 40.3   | 47.2   | 61.3   | 0.71 | 1.3E-01 |
| BF3560 | hypothetical protein                               | 33.2   | 22.5   | 29.0   | 42.4   | 40.6   | 52.6   | 1.61 | 4.9E-02 |
| BF3561 | hypothetical protein                               | 34.9   | 35.8   | 38.1   | 56.6   | 56.1   | 49.4   | 1.49 | 5.3E-03 |
| BF3562 | hypothetical protein                               | 415.4  | 397.8  | 413.0  | 317.3  | 311.8  | 265.5  | 0.73 | 1.4E-02 |
| BF3563 | hypothetical protein                               | 488.9  | 455.6  | 484.8  | 353.0  | 345.4  | 316.4  | 0.71 | 4.0E-03 |
| BF3567 | hypothetical protein                               | 5124.2 | 4793.8 | 5629.9 | 2892.3 | 3266.6 | 2853.6 | 0.58 | 4.0E-03 |
| BF3568 | putative exported phosphatase                      | 25.7   | 29.0   | 32.9   | 36.2   | 38.5   | 36.2   | 1.27 | 5.6E-02 |
| BF3569 | hypothetical protein                               | 29.4   | 39.0   | 45.4   | 41.3   | 51.3   | 46.0   | 1.23 | 2.8E-01 |
| BF3570 | putative exported phosphoesterase protein          | 28.6   | 28.2   | 31.4   | 38.0   | 35.0   | 33.7   | 1.21 | 3.5E-02 |
| BF3571 | hypothetical protein                               | 5.7    | 4.0    | 5.2    | 23.6   | 26.2   | 22.3   | 4.89 | 1.1E-03 |

|               |                                                          |            |            |            |              |              |              |              |                |
|---------------|----------------------------------------------------------|------------|------------|------------|--------------|--------------|--------------|--------------|----------------|
| BF3572        | hypothetical protein                                     | 3.9        | 5.1        | 4.8        | 16.7         | 19.0         | 19.3         | 4.01         | 8.6E-04        |
| BF3573        | putative anti sigma factor                               | 23.2       | 19.2       | 24.2       | 50.9         | 56.9         | 48.5         | 2.35         | 2.6E-03        |
| BF3574        | putative RNA polymerase sigma factor                     | 55.4       | 51.8       | 63.8       | 83.2         | 89.1         | 71.5         | 1.43         | 3.3E-02        |
| BF3575        | putative lipoprotein                                     | 4.2        | 4.3        | 3.8        | 8.3          | 9.4          | 7.4          | 2.03         | 3.8E-03        |
| BF3576        | hypothetical protein                                     | 2.6        | 2.5        | 2.7        | 6.8          | 7.4          | 6.7          | 2.66         | 1.9E-04        |
| BF3579        | hypothetical protein                                     | 2.9        | 2.7        | 2.2        | 155.4        | 168.3        | 130.9        | 58.13        | 7.7E-05        |
| BF3580        | hypothetical protein                                     | 2.6        | 1.9        | 2.1        | 142.9        | 148.9        | 125.7        | 64.01        | 6.5E-05        |
| <b>BF3581</b> | <b>hypothetical protein</b>                              | <b>2.0</b> | <b>2.5</b> | <b>2.2</b> | <b>162.8</b> | <b>163.6</b> | <b>137.4</b> | <b>69.33</b> | <b>2.3E-05</b> |
| BF3582        | putative regulatory protein (possible anti-sigma factor) | 2.9        | 5.1        | 5.6        | 39.4         | 45.3         | 44.6         | 9.93         | 2.0E-03        |
| BF3583        | putative RNA polymerase sigma factor                     | 37.5       | 45.1       | 49.3       | 73.7         | 76.9         | 64.6         | 1.64         | 1.7E-02        |
| aroC          | chorismate synthase                                      | 480.7      | 471.7      | 472.5      | 327.0        | 328.0        | 312.5        | 0.68         | 2.8E-04        |
| BF3585        | putative peptidase                                       | 366.1      | 334.8      | 366.4      | 261.1        | 278.7        | 262.4        | 0.75         | 5.2E-03        |
| BF3586        | putative exported hydrolase                              | 162.2      | 187.0      | 195.0      | 44.5         | 48.8         | 41.8         | 0.25         | 4.2E-04        |
| BF3589        | hypothetical protein                                     | 64.7       | 60.5       | 74.2       | 19.7         | 20.1         | 21.3         | 0.31         | 5.0E-04        |
| BF3590        | putative DNA topoisomerase                               | 89.1       | 80.4       | 81.1       | 82.4         | 74.4         | 80.3         | 0.95         | 3.6E-01        |
| BF3591        | putative exported hydrolase                              | 25.7       | 22.4       | 27.7       | 38.4         | 40.0         | 38.3         | 1.55         | 7.6E-03        |
| mutB          | methylmalonyl-CoA mutase                                 | 673.1      | 701.6      | 578.9      | 721.7        | 666.7        | 684.0        | 1.06         | 4.5E-01        |
| mutA          | putative methylmalonyl-CoA mutase small subunit          | 457.3      | 486.8      | 441.3      | 592.7        | 623.5        | 558.6        | 1.28         | 1.2E-02        |
| BF3594        | putative cation transport related, membrane protein      | 192.6      | 196.6      | 209.1      | 272.9        | 249.2        | 243.4        | 1.28         | 1.2E-02        |
| BF3595        | hypothetical protein                                     | 103.9      | 102.7      | 92.0       | 178.4        | 160.9        | 201.5        | 1.81         | 5.2E-03        |
| BF3596        | putative cation transport related membrane protein       | 3.8        | 3.2        | 2.4        | 6.1          | 3.9          | 5.1          | 1.61         | 9.2E-02        |
| BF3597        | hypothetical protein                                     | 49.2       | 49.7       | 49.1       | 44.6         | 35.1         | 44.5         | 0.83         | 1.3E-01        |
| BF3598        | hypothetical protein                                     | 29.8       | 32.4       | 28.0       | 35.4         | 28.2         | 30.6         | 1.04         | 6.9E-01        |
| BF3599        | hypothetical protein                                     | 67.4       | 65.1       | 55.0       | 24.7         | 20.8         | 26.2         | 0.38         | 2.3E-03        |
| BF3601        | putative cation transport related membrane protein       | 36.7       | 38.6       | 32.5       | 27.1         | 21.6         | 33.6         | 0.75         | 1.6E-01        |
| lysS          | lysyl-tRNA synthetase                                    | 504.0      | 506.4      | 488.1      | 519.3        | 506.2        | 485.8        | 1.01         | 7.8E-01        |
| BF3603        | putative phospholipids biosynthesis                      | 276.5      | 314.5      | 303.5      | 242.6        | 242.9        | 250.9        | 0.82         | 1.9E-02        |
| pgiA          | glucose-6-phosphate isomerase                            | 1040.9     | 1029.2     | 1064.4     | 923.2        | 869.4        | 891.9        | 0.86         | 5.3E-03        |
| BF3605        | putative lipoprotein                                     | 448.3      | 360.6      | 357.6      | 386.6        | 366.7        | 341.9        | 0.94         | 5.8E-01        |
| BF3606        | putative hydrolase                                       | 105.9      | 108.4      | 109.9      | 85.8         | 62.6         | 66.6         | 0.66         | 2.6E-02        |
| BFt50         | tRNA-Arg-CCG                                             | 77.6       | 55.1       | 69.9       | 58.0         | 43.6         | 47.4         | 0.74         | 1.3E-01        |
| asnA          | asparagine synthetase AsnA                               | 647.5      | 644.1      | 624.1      | 424.7        | 404.2        | 387.6        | 0.63         | 7.2E-04        |
| ung           | uracil-DNA glycosylase                                   | 705.0      | 753.9      | 709.2      | 441.7        | 429.5        | 409.0        | 0.59         | 6.0E-04        |
| BF3609        | hypothetical protein                                     | 380.9      | 368.8      | 363.5      | 248.8        | 248.9        | 254.3        | 0.68         | 2.2E-04        |
| BF3610        | hypothetical protein                                     | 101.9      | 110.1      | 105.7      | 80.3         | 95.1         | 95.2         | 0.85         | 8.9E-02        |
| BF3611        | putative glycosyl hydrolase lipoprotein                  | 30.4       | 33.9       | 33.9       | 103.5        | 105.6        | 100.6        | 3.16         | 1.5E-04        |
| BF3612        | hypothetical protein                                     | 151.2      | 151.4      | 165.8      | 162.2        | 200.9        | 187.3        | 1.17         | 1.3E-01        |
| BF3613        | putative acetyltransferase                               | 49.9       | 47.3       | 43.5       | 49.5         | 42.1         | 41.9         | 0.95         | 5.5E-01        |
| BF3614        | hypothetical protein                                     | 56.5       | 57.0       | 53.3       | 33.3         | 32.9         | 30.8         | 0.58         | 6.3E-04        |
| BF3615        | putative exported N-acetylmuramoyl-L-alanine amidase     | 205.8      | 191.0      | 204.6      | 93.2         | 94.7         | 81.0         | 0.45         | 8.8E-04        |
| BF3616        | hypothetical protein                                     | 204.5      | 200.7      | 203.2      | 196.4        | 186.2        | 152.0        | 0.87         | 2.2E-01        |
| dnaA          | chromosomal replication initiation protein               | 811.6      | 773.6      | 874.8      | 963.1        | 960.2        | 903.4        | 1.15         | 5.1E-02        |
| BF3618        | putative oxidase                                         | 96.8       | 107.2      | 112.6      | 113.7        | 117.0        | 98.3         | 1.04         | 6.8E-01        |
| BF3619        | putative ribonucleoside reductase                        | 342.5      | 411.4      | 406.0      | 497.6        | 463.6        | 470.0        | 1.24         | 5.0E-02        |



|         |                                                                 |         |         |         |        |        |        |      |         |
|---------|-----------------------------------------------------------------|---------|---------|---------|--------|--------|--------|------|---------|
| BF3620  | putative alpha-glucanotransferase                               | 66.8    | 73.4    | 71.1    | 61.4   | 55.4   | 59.4   | 0.83 | 2.5E-02 |
| BF3621  | putative acetyltransferase membrane protein                     | 14.2    | 13.7    | 12.1    | 9.1    | 11.3   | 11.2   | 0.78 | 7.8E-02 |
| BF3622  | putative dihydroneopterin aldolase                              | 37.3    | 24.9    | 27.9    | 30.8   | 36.5   | 40.4   | 1.21 | 3.3E-01 |
| BF3623  | hypothetical protein                                            | 22.2    | 25.6    | 25.1    | 45.6   | 48.3   | 45.0   | 1.91 | 1.2E-03 |
| mgsA    | putative methylglyoxal synthase                                 | 380.4   | 341.0   | 355.7   | 362.8  | 342.8  | 358.4  | 0.99 | 8.1E-01 |
| BF3625  | putative glycosyl transferase                                   | 98.0    | 95.8    | 81.7    | 88.3   | 63.0   | 125.6  | 0.97 | 9.1E-01 |
| BF3626  | putative lipid A biosynthesis related exported protein          | 146.6   | 126.4   | 131.5   | 86.5   | 93.6   | 122.7  | 0.74 | 9.5E-02 |
| BF3627  | hypothetical protein                                            | 155.7   | 132.1   | 133.5   | 107.3  | 93.5   | 144.3  | 0.81 | 2.6E-01 |
| BF3628  | putative long-chain-fatty-acid--CoA ligase                      | 109.5   | 112.9   | 112.0   | 147.9  | 139.7  | 142.5  | 1.29 | 1.2E-03 |
| BF3629  | hypothetical protein                                            | 1990.9  | 2635.3  | 2451.4  | 1152.3 | 1151.1 | 1595.4 | 0.55 | 2.6E-02 |
| rplI    | putative 50S ribosomal protein L9                               | 2289.5  | 2546.5  | 2774.5  | 3037.4 | 3113.6 | 2919.6 | 1.20 | 6.6E-02 |
| rpsR    | putative 30S ribosomal protein S18                              | 1959.7  | 1974.5  | 2425.6  | 2734.0 | 2571.2 | 2105.7 | 1.16 | 2.9E-01 |
| rpsF    | 30S ribosomal protein S6                                        | 1579.9  | 1532.5  | 1892.3  | 2281.2 | 2117.5 | 1936.6 | 1.27 | 7.2E-02 |
| BF3633  | putative MarR-family regulatory protein                         | 334.4   | 278.8   | 272.5   | 196.4  | 207.9  | 198.8  | 0.68 | 1.2E-02 |
| rprY    | two-component system, transcriptional regulatory protein        | 3208.4  | 3310.0  | 3395.2  | 2036.9 | 2140.6 | 1908.5 | 0.61 | 1.2E-03 |
| rprX    | two-component regulatory system, sensor kinase protein          | 1667.3  | 1780.9  | 1601.1  | 579.4  | 614.3  | 525.5  | 0.34 | 4.2E-04 |
| BF3636  | putative elongation factor G                                    | 87.9    | 95.5    | 82.6    | 539.1  | 531.8  | 578.1  | 6.21 | 6.9E-05 |
| BF3637  | hypothetical protein                                            | 1.2     | 0.7     | 2.0     | 0.6    | 0.0    | 0.0    | 0.49 |         |
| BF3637A | hypothetical protein                                            | 0.0     | 0.0     | 0.7     | 0.0    | 0.0    | 1.2    | 1.74 |         |
| BF3638  | putative oxygen-independent coproporphyrinogen III oxidase      | 135.5   | 144.0   | 125.1   | 121.1  | 102.3  | 138.7  | 0.89 | 3.6E-01 |
| BF3639  | putative RNA polymerase sigma factor                            | 33.5    | 29.9    | 32.0    | 46.5   | 39.2   | 39.7   | 1.31 | 2.8E-02 |
| BF3640  | hypothetical protein                                            | 305.8   | 294.8   | 269.3   | 330.3  | 322.3  | 312.3  | 1.11 | 1.0E-01 |
| BF3641  | putative transmembrane sensor/regulatory protein                | 427.8   | 444.3   | 440.8   | 305.7  | 313.1  | 311.0  | 0.71 | 2.1E-04 |
| BF3642  | hypothetical protein                                            | 140.1   | 173.5   | 141.0   | 111.9  | 101.9  | 138.7  | 0.77 | 1.3E-01 |
| BF3643  | putative lipoprotein                                            | 89.2    | 88.3    | 96.1    | 92.7   | 78.6   | 86.2   | 0.94 | 3.9E-01 |
| BF3646  | hypothetical protein                                            | 12784.8 | 11827.5 | 12303.0 | 353.8  | 412.0  | 401.7  | 0.03 | 9.2E-06 |
| BF3647  | hypothetical protein                                            | 72.4    | 71.2    | 78.2    | 52.8   | 55.1   | 45.4   | 0.69 | 1.3E-02 |
| BF3648  | putative glycosyl transferase                                   | 0.4     | 0.6     | 1.2     | 0.0    | 0.3    | 0.4    | 0.48 | 1.9E-01 |
| BF3649  | hypothetical protein                                            | 1.0     | 2.2     | 0.0     | 0.0    | 0.0    | 0.0    |      |         |
| BF3649A | hypothetical protein                                            | 1.0     | 1.0     | 2.1     | 0.0    | 0.0    | 0.9    | 0.70 |         |
| BF3650  | hypothetical protein                                            | 0.0     | 0.0     | 1.5     | 0.0    | 0.0    | 0.7    | 0.44 |         |
| BF3651  | hypothetical protein                                            | 61.0    | 51.6    | 61.0    | 82.7   | 101.8  | 62.1   | 1.40 | 1.4E-01 |
| BF3653  | hypothetical protein                                            | 160.0   | 153.9   | 159.3   | 169.5  | 171.0  | 198.3  | 1.14 | 1.1E-01 |
| BF3654  | putative S-adenosylmethionine:tRNA ribosyltransferase-isomerase | 78.4    | 85.0    | 81.9    | 90.2   | 83.6   | 85.6   | 1.06 | 2.1E-01 |
| BF3655  | putative NUDIX domain conserved hypothetical protein            | 125.9   | 152.7   | 148.2   | 133.5  | 124.7  | 134.8  | 0.92 | 3.6E-01 |
| BF3656  | putative glutathione peroxidase                                 | 365.0   | 400.8   | 374.5   | 221.0  | 237.3  | 234.9  | 0.61 | 1.0E-03 |
| BF3657  | hypothetical protein                                            | 90.2    | 90.9    | 83.5    | 61.5   | 57.1   | 70.8   | 0.71 | 1.8E-02 |
| BF3658  | putative transport-related, membrane protein                    | 0.7     | 1.0     | 0.9     | 0.8    | 0.7    | 0.7    | 0.84 | 2.2E-01 |
| BF3659  | putative lipoprotein                                            | 1.0     | 0.4     | 0.7     | 1.1    | 1.2    | 0.8    | 1.53 | 2.7E-01 |
| BF3660  | hypothetical protein                                            | 14.1    | 13.8    | 14.1    | 13.9   | 13.4   | 14.2   | 0.98 | 4.9E-01 |
| BF3661  | putative response regulator                                     | 11.5    | 15.6    | 12.5    | 17.2   | 15.7   | 19.3   | 1.32 | 9.8E-02 |

|        |                                                                                               |       |       |       |       |       |       |      |         |
|--------|-----------------------------------------------------------------------------------------------|-------|-------|-------|-------|-------|-------|------|---------|
| BF3662 | putative iron hydrogenase                                                                     | 80.9  | 76.5  | 80.0  | 123.8 | 118.0 | 120.2 | 1.53 | 4.5E-04 |
| BF3663 | biotin synthase                                                                               | 62.2  | 61.7  | 71.3  | 97.3  | 86.6  | 97.7  | 1.44 | 1.1E-02 |
| BF3664 | thiamine biosynthesis protein ThiH                                                            | 28.6  | 32.3  | 32.3  | 50.0  | 43.2  | 50.3  | 1.54 | 7.8E-03 |
| BF3665 | hypothetical protein                                                                          | 50.3  | 52.8  | 46.4  | 58.2  | 57.2  | 63.5  | 1.20 | 4.2E-02 |
| BF3666 | putative lipoprotein                                                                          | 259.4 | 282.6 | 296.0 | 162.8 | 210.4 | 162.5 | 0.64 | 2.0E-02 |
| BF3667 | putative glycosyl hydrolase                                                                   | 15.2  | 13.7  | 15.3  | 30.6  | 30.1  | 29.5  | 2.04 | 4.3E-04 |
| BF3668 | putative phosphoglucomutase/phosphomannomutase family protein                                 | 382.6 | 355.9 | 371.0 | 528.0 | 522.6 | 532.7 | 1.43 | 6.5E-04 |
| BF3669 | hypothetical protein                                                                          | 931.2 | 905.0 | 991.7 | 672.6 | 705.0 | 622.3 | 0.71 | 5.4E-03 |
| BF3670 | hypothetical protein                                                                          | 217.3 | 202.8 | 224.4 | 128.8 | 144.9 | 124.8 | 0.62 | 3.6E-03 |
| BF3671 | putative competence related membrane protein                                                  | 22.6  | 26.5  | 21.0  | 9.6   | 12.2  | 13.3  | 0.50 | 1.2E-02 |
| BF3672 | putative ribulose-phosphate 3-epimerase                                                       | 325.8 | 309.9 | 320.9 | 268.7 | 259.5 | 267.8 | 0.83 | 2.6E-03 |
| fmt    | methionyl-tRNA formyltransferase                                                              | 181.9 | 186.7 | 188.5 | 170.0 | 178.1 | 182.3 | 0.95 | 1.5E-01 |
| BF3674 | putative transport related, membrane protein                                                  | 216.5 | 224.3 | 220.5 | 179.9 | 184.5 | 196.8 | 0.85 | 1.2E-02 |
| BF3675 | hypothetical protein                                                                          | 194.9 | 177.7 | 174.0 | 168.4 | 141.6 | 232.3 | 0.97 | 8.9E-01 |
| BF3676 | hypothetical protein                                                                          | 149.3 | 145.4 | 150.5 | 164.9 | 149.3 | 147.5 | 1.04 | 4.6E-01 |
| BF3677 | hypothetical protein                                                                          | 44.1  | 38.0  | 41.7  | 22.9  | 25.1  | 28.7  | 0.62 | 9.9E-03 |
| BF3679 | putative non-specific DNA-binding protein                                                     | 1.6   | 2.9   | 3.9   | 3.7   | 0.9   | 6.4   | 1.07 | 9.4E-01 |
| BF3682 | putative phosphotransferase                                                                   | 7.4   | 7.1   | 9.7   | 4.4   | 5.3   | 6.4   | 0.67 | 8.0E-02 |
| BF3683 | DNTP-hexose dehydratase-epimerase                                                             | 11.4  | 10.3  | 8.9   | 7.8   | 7.1   | 4.7   | 0.63 | 8.8E-02 |
| BF3684 | putative glycosyltransferase protein                                                          | 8.7   | 8.0   | 10.6  | 5.3   | 7.6   | 5.8   | 0.69 | 8.1E-02 |
| BF3685 | putative glycosyltransferase protein                                                          | 11.2  | 9.9   | 15.1  | 7.6   | 5.6   | 4.9   | 0.50 | 3.7E-02 |
| BF3686 | putative polysaccharide polymerase                                                            | 7.6   | 6.2   | 8.4   | 4.6   | 5.8   | 2.8   | 0.57 | 1.2E-01 |
| BF3687 | putative glycosyltransferase protein                                                          | 15.0  | 13.9  | 17.1  | 8.1   | 7.2   | 8.1   | 0.51 | 3.1E-03 |
| BF3688 | putative alpha-1,2-fucosyltransferase                                                         | 20.9  | 15.3  | 16.5  | 9.2   | 11.7  | 9.1   | 0.57 | 2.4E-02 |
| BF3689 | putative transferase                                                                          | 13.5  | 17.8  | 15.3  | 11.4  | 10.8  | 8.6   | 0.66 | 4.6E-02 |
| BF3690 | putative O-acetyl transferase (capsular polysaccharide synthesis enzyme o-acetyl transferase) | 12.3  | 9.5   | 11.1  | 7.1   | 7.4   | 4.3   | 0.56 | 6.7E-02 |
| BF3691 | hypothetical protein                                                                          | 7.9   | 5.5   | 8.4   | 3.3   | 4.3   | 3.2   | 0.50 | 2.8E-02 |
| BF3692 | possible flippase                                                                             | 11.2  | 10.2  | 12.2  | 5.3   | 7.1   | 5.9   | 0.54 | 9.4E-03 |
| BF3693 | hypothetical protein                                                                          | 15.2  | 19.7  | 21.6  | 16.0  | 14.5  | 15.2  | 0.82 | 1.9E-01 |
| BF3694 | putative nucleotidyltransferase                                                               | 18.1  | 18.2  | 17.3  | 18.7  | 17.3  | 13.4  | 0.91 | 5.0E-01 |
| BF3695 | putative nucleotidyltransferase                                                               | 11.3  | 11.3  | 12.2  | 9.6   | 11.4  | 8.5   | 0.84 | 1.8E-01 |
| BF3696 | putative haloacid dehalogenase-like hydrolase                                                 | 11.2  | 17.2  | 11.7  | 11.6  | 14.8  | 13.1  | 1.00 | 9.9E-01 |
| BF3697 | hypothetical protein                                                                          | 12.5  | 10.0  | 15.3  | 11.0  | 8.6   | 11.4  | 0.83 | 3.6E-01 |
| updZ   | putative transcriptional regulator                                                            | 13.1  | 12.7  | 14.0  | 6.5   | 9.2   | 8.4   | 0.60 | 2.0E-02 |
| updY   | putative transcriptional regulator                                                            | 15.4  | 14.9  | 14.8  | 5.9   | 9.5   | 8.5   | 0.52 | 2.3E-02 |
| BF3700 | hypothetical protein                                                                          | 17.5  | 20.5  | 19.2  | 2.6   | 3.2   | 3.5   | 0.16 | 5.1E-04 |
| BF3701 | hypothetical protein                                                                          | 13.0  | 8.4   | 13.7  | 7.9   | 2.3   | 7.2   | 0.44 | 1.8E-01 |
| BF3702 | hypothetical protein                                                                          | 13.0  | 7.8   | 9.5   | 5.9   | 6.8   | 7.1   | 0.67 | 9.8E-02 |
| tag    | putative DNA-3-methyladenine glycosylase I                                                    | 134.6 | 132.3 | 142.1 | 122.0 | 117.3 | 133.2 | 0.91 | 1.4E-01 |
| BF3705 | putative single-stranded-DNA-specific exonuclease                                             | 348.8 | 378.8 | 347.5 | 292.0 | 267.8 | 293.9 | 0.79 | 1.3E-02 |

|         |                                                        |        |        |        |        |        |        |      |         |
|---------|--------------------------------------------------------|--------|--------|--------|--------|--------|--------|------|---------|
| BF3706  | putative DEAD box helicase                             | 83.8   | 85.0   | 83.7   | 65.3   | 61.2   | 68.5   | 0.77 | 5.0E-03 |
| BF3707  | hypothetical protein                                   | 92.2   | 85.6   | 90.4   | 207.7  | 193.3  | 200.4  | 2.24 | 1.9E-04 |
| BF3708  | putative transport related, membrane protein           | 4.1    | 3.8    | 4.4    | 6.6    | 8.1    | 8.9    | 1.90 | 8.0E-03 |
| BF3709  | putative sialidase                                     | 2.0    | 1.9    | 3.1    | 4.4    | 3.7    | 3.1    | 1.64 | 8.8E-02 |
| BF3710  | hypothetical protein                                   | 3.4    | 2.0    | 1.7    | 4.0    | 4.0    | 5.2    | 1.92 | 7.7E-02 |
| BF3711  | putative lipoprotein                                   | 3.1    | 3.7    | 3.0    | 3.1    | 2.5    | 3.3    | 0.90 | 4.5E-01 |
| BF3712  | hypothetical protein                                   | 7.1    | 8.6    | 10.1   | 5.8    | 7.1    | 5.8    | 0.72 | 9.2E-02 |
| BF3713  | putative N-acetylneuraminase (sialic acid lyase)       | 37.9   | 38.2   | 32.5   | 16.7   | 23.4   | 23.3   | 0.58 | 2.4E-02 |
| BF3714  | putative GntR-family regulatory protein                | 196.7  | 207.7  | 172.0  | 21.7   | 23.7   | 27.2   | 0.13 | 2.4E-04 |
| BF3715  | putative prefrenate dehydratase                        | 97.0   | 94.7   | 96.7   | 168.8  | 203.8  | 172.9  | 1.88 | 2.2E-03 |
| BF3716  | putative aminotransferase                              | 128.8  | 139.5  | 121.2  | 102.7  | 100.0  | 125.9  | 0.84 | 1.5E-01 |
| BF3717  | putative chorismate mutase                             | 183.3  | 195.5  | 193.4  | 129.4  | 112.9  | 146.6  | 0.68 | 1.8E-02 |
| BF3718  | putative prephenate dehydrogenase family protein       | 226.4  | 258.0  | 292.2  | 153.2  | 155.5  | 147.4  | 0.59 | 6.9E-03 |
| BF3719  | hypothetical protein                                   | 24.9   | 25.5   | 32.1   | 13.2   | 14.9   | 13.1   | 0.50 | 5.6E-03 |
| BF3720  | putative DNA primase                                   | 123.0  | 120.0  | 93.3   | 137.6  | 104.3  | 149.8  | 1.16 | 4.2E-01 |
| BF3721  | putative exported sulfatase                            | 3.5    | 4.6    | 2.7    | 6.9    | 5.3    | 7.9    | 1.87 | 5.7E-02 |
| BF3722  | putative exported uslfatase                            | 1.5    | 1.6    | 1.4    | 4.3    | 3.0    | 4.8    | 2.57 | 8.2E-03 |
| BF3723  | hypothetical protein                                   | 3.4    | 3.7    | 2.8    | 10.9   | 10.3   | 13.1   | 3.46 | 2.0E-03 |
| BF3724  | hypothetical protein                                   | 4.7    | 4.1    | 4.5    | 6.1    | 6.2    | 8.2    | 1.53 | 2.9E-02 |
| BF3725  | hypothetical protein                                   | 51.4   | 40.4   | 38.5   | 19.4   | 16.9   | 22.0   | 0.45 | 7.3E-03 |
| BF3726  | putative RNA polymerase sigma factor                   | 121.6  | 119.0  | 120.1  | 111.2  | 122.4  | 111.4  | 0.96 | 3.0E-01 |
| folE    | GTP cyclohydrolase I                                   | 189.4  | 158.8  | 181.7  | 125.2  | 141.8  | 157.1  | 0.80 | 9.1E-02 |
| BF3728  | hypothetical protein                                   | 188.2  | 195.2  | 187.4  | 164.3  | 169.8  | 183.2  | 0.91 | 7.6E-02 |
| tpiA    | triosephosphate isomerase                              | 1861.6 | 1906.9 | 1905.0 | 2176.7 | 2252.9 | 2142.4 | 1.16 | 3.8E-03 |
| BF3730  | hypothetical protein                                   | 280.0  | 270.0  | 280.9  | 149.6  | 152.0  | 153.5  | 0.55 | 5.0E-05 |
| BF3731  | hypothetical protein                                   | 420.8  | 416.2  | 416.2  | 205.4  | 210.7  | 222.6  | 0.51 | 1.6E-04 |
| BF3732  | putative exported peptidase                            | 1492.2 | 1479.8 | 1523.6 | 1745.0 | 1693.8 | 1566.3 | 1.11 | 5.8E-02 |
| BF3733  | putative nucleoside diphosphate kinase                 | 1817.7 | 1770.7 | 1754.6 | 1295.8 | 1231.4 | 1389.9 | 0.73 | 4.1E-03 |
| BF3734  | putative ATP-dependent DNA helicase                    | 119.7  | 100.0  | 104.3  | 142.8  | 142.5  | 134.5  | 1.30 | 2.3E-02 |
| ispD    | 2-C-methyl-D-erythritol 4-phosphate cytidyltransferase | 221.9  | 218.4  | 203.1  | 280.5  | 287.2  | 320.1  | 1.38 | 8.2E-03 |
| BF3736  | putative thiamine biosynthesis related protein         | 411.1  | 380.8  | 352.0  | 485.0  | 473.0  | 544.0  | 1.31 | 2.5E-02 |
| BF3737  | putative TonB exported protein                         | 216.4  | 168.8  | 173.8  | 194.0  | 179.8  | 262.9  | 1.13 | 5.0E-01 |
| BF3738  | putative transport related protein                     | 255.0  | 231.8  | 261.3  | 236.0  | 274.7  | 252.8  | 1.02 | 7.9E-01 |
| BF3739  | putative transport related membrane protein            | 328.3  | 302.7  | 321.7  | 372.2  | 359.1  | 361.5  | 1.15 | 1.6E-02 |
| BF3740  | pyridoxal phosphate biosynthetic protein               | 210.6  | 216.6  | 201.6  | 227.2  | 228.9  | 225.0  | 1.08 | 3.8E-02 |
| ppnK    | inorganic polyphosphate/ATP-NAD kinase                 | 131.0  | 138.2  | 149.1  | 143.3  | 143.9  | 115.6  | 0.96 | 6.9E-01 |
| 5S      |                                                        | 4.7    | 6.9    | 36.7   | 1.9    | 4.5    | 25.4   | 0.57 | 6.6E-01 |
| 23S     |                                                        | 13.7   | 7.5    | 12.2   | 16.3   | 9.1    | 22.1   | 1.38 | 4.5E-01 |
| BFt51   | tRNA-Ala-TGC                                           | 87.0   | 97.6   | 97.6   | 47.1   | 45.1   | 95.3   | 0.62 | 1.8E-01 |
| BFt52   | tRNA-Ile-GAT                                           | 158.9  | 177.9  | 180.8  | 63.0   | 65.0   | 113.6  | 0.45 | 3.1E-02 |
| 16S     |                                                        | 672.5  | 32.3   | 99.0   | 90.9   | 32.3   | 230.2  | 0.68 | 7.8E-01 |
| BF3741A | hypothetical protein                                   | 0.0    | 457.3  | 0.0    | 96.4   | 92.4   | 155.5  | 0.24 |         |
| BF3742  | hypothetical protein                                   | 43.0   | 55.7   | 61.6   | 33.3   | 41.5   | 31.0   | 0.66 | 6.9E-02 |

|        |                                                                |        |        |        |        |        |        |      |         |
|--------|----------------------------------------------------------------|--------|--------|--------|--------|--------|--------|------|---------|
| BF3743 | hypothetical protein                                           | 222.5  | 244.0  | 263.5  | 188.4  | 238.5  | 142.3  | 0.76 | 2.2E-01 |
| BF3744 | putative RNA polymerase sigma factor                           | 22.4   | 28.1   | 30.8   | 67.8   | 76.0   | 67.2   | 2.61 | 3.1E-03 |
| BF3745 | hypothetical protein                                           | 12.7   | 10.7   | 8.8    | 24.7   | 29.1   | 21.1   | 2.33 | 1.1E-02 |
| BF3746 | hypothetical protein                                           | 2.5    | 3.1    | 2.0    | 12.2   | 13.7   | 13.0   | 5.27 | 1.3E-03 |
| BF3747 | putative lipoprotein                                           | 1.7    | 2.0    | 1.7    | 9.7    | 11.3   | 9.5    | 5.66 | 2.7E-04 |
| BF3748 | putative lipoprotein                                           | 3.3    | 1.0    | 2.1    | 12.0   | 15.8   | 7.2    | 5.86 | 2.8E-02 |
| BF3749 | hypothetical protein                                           | 7.9    | 8.5    | 6.4    | 16.9   | 15.8   | 17.2   | 2.21 | 3.5E-03 |
| BF3750 | hypothetical protein                                           | 51.2   | 47.9   | 51.0   | 44.2   | 53.3   | 47.3   | 0.96 | 6.1E-01 |
| BF3751 | putative antibiotic resistance-related regulatory protein      | 74.8   | 71.1   | 76.7   | 87.4   | 87.7   | 65.0   | 1.07 | 6.2E-01 |
| BF3752 | putative exported peptidase                                    | 89.1   | 81.1   | 86.4   | 132.2  | 132.6  | 139.4  | 1.58 | 1.0E-03 |
| mdh    | putative malate dehydrogenase                                  | 1497.2 | 1676.2 | 1709.9 | 1980.4 | 1900.0 | 1907.5 | 1.19 | 3.4E-02 |
| BF3754 | hypothetical protein                                           | 124.1  | 125.1  | 127.3  | 97.7   | 91.7   | 95.8   | 0.76 | 1.0E-03 |
| BF3755 | hypothetical protein                                           | 28.8   | 23.3   | 26.0   | 15.1   | 17.3   | 14.0   | 0.59 | 1.1E-02 |
| BF3756 | putative RNA polymerase sigma factor                           | 23.8   | 15.2   | 19.6   | 14.2   | 14.4   | 14.9   | 0.75 | 1.4E-01 |
| BF3757 | hypothetical protein                                           | 19.9   | 14.5   | 18.5   | 3.4    | 3.6    | 2.9    | 0.19 | 9.1E-04 |
| BF3759 | putative outer membrane protein                                | 44.1   | 44.2   | 31.2   | 30.8   | 27.1   | 25.8   | 0.71 | 8.5E-02 |
| BF3760 | hypothetical protein                                           | 25.6   | 33.8   | 26.0   | 45.5   | 30.0   | 41.4   | 1.36 | 1.7E-01 |
| BF3761 | putative conserved transport-related membrane protein          | 31.5   | 28.9   | 26.6   | 35.1   | 32.1   | 29.2   | 1.11 | 2.9E-01 |
| BF3762 | putative transport-related membrane protein                    | 25.1   | 26.4   | 25.6   | 25.1   | 25.1   | 21.4   | 0.93 | 3.1E-01 |
| BF3763 | hypothetical protein                                           | 44.2   | 44.7   | 41.9   | 40.5   | 39.3   | 37.2   | 0.89 | 4.7E-02 |
| BF3764 | putative acylhydrolase                                         | 11.2   | 14.3   | 9.9    | 8.0    | 9.2    | 7.2    | 0.69 | 8.2E-02 |
| BF3765 | hypothetical protein                                           | 11.3   | 11.0   | 10.9   | 14.9   | 12.3   | 7.7    | 1.01 | 9.6E-01 |
| BF3766 | hypothetical protein                                           | 296.5  | 250.3  | 284.0  | 494.4  | 490.1  | 405.6  | 1.67 | 9.5E-03 |
| BF3767 | hypothetical protein                                           | 152.2  | 159.9  | 156.8  | 308.5  | 309.6  | 291.7  | 1.94 | 1.7E-04 |
| BF3768 | putative exported thioredoxin                                  | 19.9   | 25.0   | 21.4   | 103.1  | 93.9   | 97.8   | 4.47 | 3.6E-04 |
| BF3769 | hypothetical protein                                           | 227.0  | 175.3  | 188.5  | 131.1  | 131.4  | 179.1  | 0.74 | 1.3E-01 |
| trmB   | tRNA (guanine-N(7)-)-methyltransferase                         | 114.5  | 70.8   | 95.3   | 50.0   | 67.8   | 74.8   | 0.69 | 1.7E-01 |
| BF3771 | putative hydrolase                                             | 167.7  | 153.7  | 149.0  | 153.6  | 147.1  | 207.7  | 1.07 | 6.6E-01 |
| BF3772 | branched-chain amino acid aminotransferase                     | 460.2  | 490.0  | 463.3  | 541.7  | 525.3  | 590.8  | 1.17 | 3.4E-02 |
| BF3773 | putative exodeoxyribonuclease VII small subunit                | 99.4   | 85.5   | 90.3   | 113.1  | 96.9   | 110.5  | 1.16 | 1.2E-01 |
| BF3774 | exodeoxyribonuclease VII large subunit                         | 123.4  | 133.3  | 98.3   | 136.3  | 110.7  | 195.8  | 1.22 | 4.2E-01 |
| BF3775 | putative exported serine protease, subtilase family            | 96.2   | 97.7   | 79.7   | 101.3  | 81.2   | 124.8  | 1.11 | 5.7E-01 |
| BF3776 | putative tRNA methyltransferase                                | 61.1   | 59.5   | 37.1   | 53.1   | 32.1   | 82.7   | 1.01 | 9.7E-01 |
| BF3777 | hypothetical protein                                           | 3.1    | 2.5    | 5.8    | 0.7    | 1.6    | 0.7    | 0.26 | 4.4E-02 |
| BF3778 | hypothetical protein                                           | 54.8   | 46.8   | 42.2   | 33.4   | 36.1   | 42.4   | 0.78 | 1.1E-01 |
| BF3779 | hypothetical protein                                           | 131.6  | 139.2  | 126.8  | 148.7  | 125.9  | 129.4  | 1.01 | 8.6E-01 |
| ispF   | putative 2-C-methyl-D-erythritol 2,4-cyclodiphosphate synthase | 178.3  | 188.1  | 167.6  | 188.5  | 162.2  | 171.0  | 0.98 | 7.4E-01 |
| BF3781 | putative hydrolase                                             | 325.9  | 331.1  | 341.5  | 273.8  | 259.4  | 291.5  | 0.83 | 1.5E-02 |
| BF3782 | redox-sensing transcriptional repressor Rex                    | 535.5  | 581.2  | 555.9  | 330.2  | 310.0  | 331.7  | 0.58 | 6.2E-04 |
| BF3783 | putative translation initiation factor                         | 221.2  | 201.1  | 156.1  | 254.4  | 206.6  | 274.4  | 1.28 | 2.0E-01 |
| tsf    | elongation factor Ts                                           | 1530.9 | 1643.8 | 1661.3 | 2096.4 | 2151.7 | 2208.1 | 1.34 | 2.8E-03 |
| rpsB   | 30S ribosomal protein S2                                       | 2183.4 | 2258.5 | 2549.1 | 2880.2 | 2905.4 | 2657.5 | 1.21 | 4.7E-02 |

|        |                                                                   |        |        |        |        |        |        |      |         |
|--------|-------------------------------------------------------------------|--------|--------|--------|--------|--------|--------|------|---------|
| rpsI   | 30S ribosomal protein S9                                          | 1939.2 | 2057.8 | 2185.5 | 2666.7 | 2680.0 | 2566.7 | 1.28 | 7.8E-03 |
| rplM   | 50S ribosomal protein L13                                         | 1844.4 | 1795.6 | 1917.4 | 2611.0 | 2484.2 | 2449.4 | 1.36 | 1.8E-03 |
| BF3788 | hypothetical protein                                              | 411.7  | 396.6  | 433.9  | 549.3  | 504.4  | 573.6  | 1.31 | 1.1E-02 |
| BF3789 | hypothetical protein                                              | 1199.4 | 1226.7 | 1358.9 | 1052.7 | 1276.3 | 955.4  | 0.86 | 2.5E-01 |
| asnS   | asparaginyl-tRNA synthetase                                       | 965.5  | 1016.5 | 986.3  | 601.4  | 611.3  | 592.2  | 0.61 | 1.6E-04 |
| BF3791 | putative ribosomal large subunit pseudouridine synthase           | 1139.3 | 1240.4 | 1139.3 | 923.6  | 903.2  | 933.7  | 0.79 | 4.7E-03 |
| purB   | adenylosuccinate lyase                                            | 571.4  | 552.9  | 555.9  | 526.7  | 521.4  | 503.2  | 0.92 | 2.2E-02 |
| BF3793 | putative exported beta-galactosidase                              | 125.6  | 123.5  | 122.4  | 258.1  | 258.6  | 249.8  | 2.06 | 2.0E-05 |
| BFi53  | tRNA-Val-TAC                                                      | 0.0    | 0.0    | 0.0    | 0.0    | 0.0    | 0.0    |      |         |
| BFi54  | tRNA-Val-TAC                                                      | 0.0    | 0.0    | 0.0    | 0.0    | 0.0    | 0.0    |      |         |
| BFi55  | tRNA-Val-TAC                                                      | 244.3  | 271.9  | 214.2  | 132.9  | 104.8  | 570.8  | 0.82 | 7.8E-01 |
| maa    | putative maltose O-acetyltransferase                              | 47.3   | 38.4   | 41.9   | 58.8   | 61.4   | 61.0   | 1.43 | 1.2E-02 |
| BF3795 | hypothetical protein                                              | 60.2   | 52.9   | 50.6   | 88.1   | 87.7   | 83.3   | 1.59 | 4.2E-03 |
| BF3796 | putative exported hyaluronidase                                   | 125.5  | 122.7  | 114.2  | 289.1  | 291.0  | 263.2  | 2.33 | 4.2E-04 |
| aapH   | hypothetical protein                                              | 272.0  | 280.1  | 319.3  | 167.2  | 172.9  | 199.7  | 0.62 | 8.4E-03 |
| aapG   | hypothetical protein                                              | 290.7  | 304.1  | 294.4  | 207.3  | 171.3  | 213.2  | 0.66 | 1.1E-02 |
| aapF   | hypothetical protein                                              | 150.4  | 146.2  | 142.6  | 76.1   | 73.5   | 77.3   | 0.52 | 1.2E-04 |
| aapE   | putative outer membrane protein                                   | 149.1  | 143.6  | 124.5  | 73.7   | 72.2   | 90.5   | 0.57 | 9.3E-03 |
| aapD   | hypothetical protein                                              | 150.9  | 163.2  | 147.6  | 93.5   | 86.5   | 104.5  | 0.62 | 5.3E-03 |
| aapC   | hypothetical protein                                              | 158.4  | 170.7  | 168.6  | 104.5  | 91.4   | 111.2  | 0.62 | 5.2E-03 |
| aapB   | hypothetical protein                                              | 275.3  | 273.1  | 267.0  | 173.3  | 168.4  | 154.2  | 0.61 | 1.1E-03 |
| aapA   | putative lipoprotein                                              | 579.9  | 626.2  | 599.6  | 431.4  | 395.1  | 408.3  | 0.68 | 1.9E-03 |
| tsr15  | tyrosine site-specific recombinase                                | 61.4   | 56.2   | 67.2   | 46.9   | 49.3   | 58.0   | 0.83 | 1.4E-01 |
| BF3807 | hypothetical protein                                              | 139.2  | 96.4   | 136.0  | 125.3  | 151.4  | 140.5  | 1.14 | 4.6E-01 |
| carB2  | putative carbamoyl-phosphate synthase large chain 2               | 259.9  | 246.1  | 227.2  | 331.5  | 325.6  | 341.0  | 1.36 | 5.7E-03 |
| trpS   | tryptophanyl-tRNA synthetase                                      | 176.8  | 122.2  | 147.9  | 94.2   | 110.2  | 128.7  | 0.75 | 1.5E-01 |
| ompA   | putative major outer membrane protein                             | 4554.3 | 5007.9 | 4791.8 | 1611.7 | 1561.2 | 1657.4 | 0.34 | 9.7E-05 |
| BF3811 | putative hemolysin secretion transport system membrane protein    | 5.5    | 3.7    | 4.0    | 11.5   | 8.8    | 18.3   | 2.85 | 2.7E-02 |
| BF3812 | putative hemolysin secretion transport system ATP-binding protein | 13.7   | 13.3   | 10.6   | 19.1   | 18.4   | 23.4   | 1.61 | 2.6E-02 |
| BF3813 | hypothetical protein                                              | 2.1    | 2.2    | 2.6    | 2.5    | 0.7    | 2.0    | 0.66 | 4.4E-01 |
| BF3814 | hypothetical protein                                              | 5.3    | 3.1    | 2.9    | 3.0    | 4.3    | 2.3    | 0.85 | 6.4E-01 |
| BF3815 | putative LPS biosynthesis-related glycosyltransferase             | 7.4    | 4.0    | 4.7    | 2.2    | 2.3    | 5.9    | 0.60 | 3.1E-01 |
| BF3816 | putative fucosyltransferase                                       | 9.9    | 9.1    | 10.7   | 3.9    | 5.5    | 5.5    | 0.50 | 1.2E-02 |
| BF3817 | hypothetical protein                                              | 8.0    | 7.0    | 5.7    | 4.6    | 5.0    | 6.9    | 0.79 | 2.9E-01 |
| BF3819 | hypothetical protein                                              | 6.4    | 8.0    | 10.0   | 8.2    | 7.0    | 5.9    | 0.87 | 4.9E-01 |
| BF3820 | putative dehydrogenase                                            | 8.9    | 6.6    | 6.2    | 8.4    | 9.7    | 8.3    | 1.22 | 2.3E-01 |
| BF3821 | putative regulatory protein                                       | 12.6   | 10.1   | 13.0   | 13.4   | 14.5   | 9.1    | 1.03 | 9.1E-01 |
| BF3822 | hypothetical protein                                              | 12.2   | 12.1   | 14.5   | 13.9   | 15.7   | 8.7    | 0.96 | 8.8E-01 |
| BF3823 | hypothetical protein                                              | 42.0   | 37.2   | 48.1   | 48.9   | 61.6   | 48.7   | 1.25 | 1.6E-01 |
| BF3824 | hypothetical protein                                              | 17.4   | 13.8   | 18.5   | 23.8   | 23.1   | 20.5   | 1.36 | 6.3E-02 |
| BF3825 | hypothetical protein                                              | 81.4   | 67.8   | 90.3   | 221.1  | 236.9  | 182.7  | 2.68 | 4.0E-03 |
| BF3826 | putative glycosyltransferase                                      | 3.6    | 1.8    | 2.8    | 3.9    | 4.8    | 5.5    | 1.78 | 9.4E-02 |
| BF3827 | hypothetical protein                                              | 1.4    | 0.9    | 3.3    | 3.9    | 3.1    | 2.6    | 2.01 | 2.2E-01 |
| BF3828 | hypothetical protein                                              | 4.1    | 3.7    | 5.1    | 2.8    | 4.8    | 4.0    | 0.89 | 6.2E-01 |
| BF3829 | hypothetical protein                                              | 5.8    | 6.5    | 5.8    | 6.1    | 9.8    | 7.3    | 1.25 | 2.5E-01 |
| BF3830 | hypothetical protein                                              | 17.0   | 15.0   | 18.3   | 25.9   | 33.0   | 35.8   | 1.87 | 1.4E-02 |

|        |                                                    |        |        |        |        |        |        |      |         |
|--------|----------------------------------------------------|--------|--------|--------|--------|--------|--------|------|---------|
| BF3831 | hypothetical protein                               | 45.3   | 40.0   | 43.9   | 28.6   | 32.3   | 28.1   | 0.69 | 8.6E-03 |
| BF3832 | hypothetical protein                               | 0.0    | 2.5    | 0.0    | 3.3    | 2.7    | 0.0    | 1.21 |         |
| BF3833 | hypothetical protein                               | 6.7    | 15.7   | 9.0    | 10.3   | 9.0    | 9.3    | 0.97 | 9.2E-01 |
| BF3834 | putative lipoprotein                               | 21.7   | 20.4   | 17.2   | 20.0   | 22.6   | 22.9   | 1.11 | 3.5E-01 |
| BF3835 | hypothetical protein                               | 2.9    | 1.0    | 1.1    | 0.9    | 1.1    | 2.8    | 0.97 | 9.6E-01 |
| BF3836 | hypothetical protein                               | 1.8    | 1.7    | 1.8    | 0.6    | 0.8    | 1.0    | 0.44 | 2.0E-02 |
| BF3837 | hypothetical protein                               | 1.3    | 0.5    | 1.5    | 0.3    | 0.2    | 0.5    | 0.31 | 7.7E-02 |
| BF3838 | hypothetical protein                               | 0.0    | 0.0    | 0.5    | 0.0    | 0.0    | 0.4    | 0.87 |         |
| BF3839 | putative phage integrase                           | 1.3    | 0.6    | 1.3    | 0.3    | 0.2    | 0.3    | 0.23 | 1.8E-02 |
| BF3840 | hypothetical protein                               | 1.7    | 3.1    | 1.3    | 4.4    | 4.7    | 8.4    | 2.93 | 5.5E-02 |
| BF3841 | hypothetical protein                               | 2.1    | 2.3    | 1.2    | 1.0    | 2.5    | 6.2    | 1.39 | 6.5E-01 |
| BF3842 | hypothetical protein                               | 1.8    | 0.0    | 3.0    | 0.9    | 1.1    | 2.6    | 0.57 | 3.5E-01 |
| BF3843 | hypothetical protein                               | 1.6    | 0.7    | 1.7    | 1.1    | 0.3    | 0.9    | 0.50 | 3.2E-01 |
| BF3844 | hypothetical protein                               | 1.1    | 0.0    | 0.6    | 1.0    | 1.9    | 1.6    | 1.80 | 2.5E-01 |
| BF3845 | hypothetical protein                               | 2.0    | 1.5    | 0.3    | 1.4    | 0.7    | 1.4    | 1.09 | 9.2E-01 |
| BF3846 | hypothetical protein                               | 0.0    | 1.0    | 1.0    | 0.0    | 0.0    | 0.0    |      |         |
| BF3847 | hypothetical protein                               | 1.4    | 1.9    | 1.5    | 0.6    | 1.4    | 1.3    | 0.64 | 2.8E-01 |
| BF3848 | hypothetical protein                               | 3.9    | 1.5    | 1.5    | 0.3    | 0.6    | 0.5    | 0.22 | 4.1E-02 |
| BF3850 | putative regulatory protein                        | 1.9    | 1.6    | 2.1    | 0.7    | 0.8    | 0.4    | 0.32 | 1.6E-02 |
| BF3851 | hypothetical protein                               | 0.6    | 1.5    | 0.7    | 0.5    | 0.7    | 0.8    | 0.72 | 4.4E-01 |
| BF3852 | putative transport related membrane protein        | 0.5    | 0.5    | 1.1    | 0.4    | 0.3    | 0.3    | 0.50 | 1.0E-01 |
| BF3853 | putative outer membrane protein                    | 1.1    | 0.8    | 1.0    | 0.4    | 0.7    | 0.2    | 0.36 | 8.9E-02 |
| BF3854 | hypothetical protein                               | 2.0    | 4.7    | 3.9    | 0.8    | 1.4    | 1.1    | 0.32 | 4.2E-02 |
| BF3855 | putative regulatory protein                        | 83.2   | 90.5   | 90.3   | 61.7   | 88.0   | 73.5   | 0.84 | 2.3E-01 |
| BF3856 | putative iron transport, fusion membrane protein   | 23.3   | 22.9   | 23.8   | 21.7   | 29.3   | 22.4   | 1.04 | 7.6E-01 |
| BF3857 | putative exported esterase                         | 15.0   | 11.0   | 13.1   | 16.1   | 18.5   | 13.8   | 1.24 | 2.2E-01 |
| BF3858 | putative acetylmithine aminotransferase            | 10.2   | 8.8    | 10.3   | 7.9    | 9.4    | 8.6    | 0.88 | 2.1E-01 |
| aspC2  | putative aspartate aminotransferase                | 8.3    | 6.6    | 6.5    | 9.2    | 13.0   | 9.1    | 1.45 | 9.1E-02 |
| BF3860 | putative hydrolase                                 | 8.0    | 10.2   | 6.5    | 7.3    | 9.0    | 7.7    | 0.98 | 9.4E-01 |
| BF3861 | pyridoxine kinase                                  | 4.9    | 5.2    | 5.8    | 8.2    | 10.3   | 6.0    | 1.52 | 1.0E-01 |
| dapA1  | putative dihydrodipicolinate synthase              | 11.6   | 11.7   | 7.4    | 12.5   | 12.1   | 8.3    | 1.08 | 7.8E-01 |
| BF3863 | putative copper transport-related membrane protein | 5.8    | 6.4    | 5.1    | 5.3    | 6.4    | 4.1    | 0.91 | 6.1E-01 |
| BF3864 | hypothetical protein                               | 0.7    | 0.4    | 1.5    | 0.0    | 0.0    | 1.0    | 1.37 |         |
| BF3865 | conserved hypothetical fusion protein              | 0.0    | 0.2    | 0.2    | 0.0    | 0.0    | 0.2    | 0.89 |         |
| BF3866 | hypothetical protein                               | 0.3    | 0.2    | 0.4    | 0.2    | 0.0    | 0.1    | 0.44 | 1.9E-01 |
| BF3867 | hypothetical protein                               | 0.0    | 0.0    | 0.0    | 0.0    | 0.9    | 0.0    |      |         |
| BF3871 | hypothetical protein                               | 21.5   | 29.2   | 27.5   | 33.7   | 42.8   | 35.1   | 1.43 | 6.8E-02 |
| BF3872 | hypothetical protein                               | 84.6   | 67.6   | 96.9   | 123.3  | 150.0  | 91.3   | 1.45 | 1.5E-01 |
| BF3873 | hypothetical protein                               | 95.9   | 87.3   | 105.3  | 141.0  | 182.8  | 117.4  | 1.51 | 7.1E-02 |
| BF3876 | putative lipoprotein                               | 13.6   | 9.8    | 14.3   | 10.9   | 13.1   | 11.4   | 0.95 | 7.6E-01 |
| BF3877 | hypothetical protein                               | 1.5    | 1.9    | 2.3    | 3.6    | 7.3    | 4.4    | 2.56 | 3.5E-02 |
| BF3878 | hypothetical protein                               | 5.6    | 4.8    | 6.4    | 7.2    | 9.0    | 7.9    | 1.45 | 4.6E-02 |
| BF3879 | putative transposase                               | 10.7   | 10.7   | 5.9    | 13.1   | 13.9   | 17.8   | 1.69 | 1.2E-01 |
| BF3880 | hypothetical protein                               | 1.0    | 2.2    | 4.5    | 4.9    | 6.0    | 1.0    | 1.41 | 7.1E-01 |
| BF3881 | hypothetical protein                               | 2.7    | 2.2    | 3.7    | 1.3    | 3.1    | 0.6    | 0.49 | 2.8E-01 |
| BF3882 | hypothetical protein                               | 3.1    | 2.0    | 1.4    | 2.4    | 0.7    | 1.2    | 0.62 | 3.9E-01 |
| ubb    | putative ubiquitin                                 | 4888.0 | 4375.3 | 5488.4 | 4241.0 | 4798.6 | 3256.6 | 0.83 | 2.9E-01 |

|        |                                                               |        |        |        |        |        |        |      |         |
|--------|---------------------------------------------------------------|--------|--------|--------|--------|--------|--------|------|---------|
| BF3884 | hypothetical protein                                          | 9.8    | 8.8    | 6.6    | 7.9    | 6.1    | 6.5    | 0.82 | 2.8E-01 |
| mutL   | putative DNA mismatch repair protein                          | 200.4  | 219.1  | 199.7  | 248.9  | 235.9  | 257.3  | 1.20 | 2.2E-02 |
| BF3886 | hypothetical protein                                          | 322.6  | 346.3  | 320.6  | 347.4  | 334.3  | 357.4  | 1.05 | 2.5E-01 |
| BF3887 | hypothetical protein                                          | 294.9  | 299.2  | 290.5  | 233.4  | 229.1  | 219.6  | 0.77 | 1.2E-03 |
| BF3888 | putative exported peptidyl-prolyl cis-trans isomerase         | 673.8  | 663.3  | 611.5  | 522.2  | 511.1  | 500.3  | 0.79 | 6.0E-03 |
| BF3889 | hypothetical protein                                          | 384.1  | 351.1  | 344.1  | 288.8  | 296.6  | 310.6  | 0.83 | 2.2E-02 |
| BF3890 | putative exported isomerase                                   | 96.5   | 102.5  | 92.7   | 91.5   | 91.1   | 98.4   | 0.96 | 4.6E-01 |
| guaB   | putative inosine-5'-monophosphate dehydrogenase               | 355.5  | 351.2  | 309.8  | 375.6  | 320.6  | 418.6  | 1.09 | 4.5E-01 |
| recQ1  | putative ATP-dependent DNA helicase                           | 1005.8 | 1042.1 | 1006.4 | 982.7  | 993.5  | 1038.2 | 0.99 | 6.2E-01 |
| clpX   | ATP-dependent protease ATP-binding subunit                    | 435.3  | 462.0  | 435.3  | 474.4  | 458.8  | 490.5  | 1.07 | 1.2E-01 |
| clpP   | putative ATP-dependent CLP protease proteolytic subunit       | 476.2  | 479.7  | 442.8  | 529.9  | 477.7  | 470.4  | 1.06 | 3.7E-01 |
| BF3895 | putative cell division trigger factor                         | 969.2  | 911.2  | 1029.7 | 1231.5 | 1088.2 | 1098.8 | 1.17 | 6.6E-02 |
| BF3896 | hypothetical protein                                          | 9.5    | 17.0   | 12.9   | 7.1    | 6.6    | 7.1    | 0.54 | 4.2E-02 |
| BF3897 | putative RNA-binding protein                                  | 6129.9 | 5911.4 | 6528.9 | 3494.3 | 3562.6 | 3314.7 | 0.56 | 6.9E-04 |
| BF3898 | putative ABC transport system, ATP-binding protein            | 179.2  | 192.9  | 173.4  | 195.3  | 158.2  | 191.9  | 1.00 | 9.7E-01 |
| BF3899 | hypothetical protein                                          | 201.1  | 186.2  | 180.1  | 151.5  | 146.1  | 160.9  | 0.81 | 1.8E-02 |
| BF3900 | putative ABC amino acid transport system, ATP-binding protein | 149.9  | 140.0  | 161.0  | 137.5  | 144.1  | 141.8  | 0.94 | 2.9E-01 |
| BF3901 | putative LuxR-family regulatory protein                       | 258.4  | 263.0  | 236.0  | 205.2  | 194.2  | 236.4  | 0.84 | 9.3E-02 |
| BF3902 | GTP-binding protein EngA                                      | 370.1  | 320.7  | 394.1  | 259.4  | 313.9  | 297.5  | 0.80 | 9.3E-02 |
| BF3903 | putative GTP-binding protein (cell growth-related)            | 370.0  | 334.7  | 429.2  | 248.3  | 299.8  | 259.3  | 0.71 | 4.1E-02 |
| fabH   | 3-oxoacyl-(acyl carrier protein) synthase                     | 1431.6 | 1262.1 | 1522.3 | 1827.6 | 1969.9 | 1782.2 | 1.33 | 2.4E-02 |
| BF3905 | hypothetical protein                                          | 720.6  | 681.5  | 797.5  | 494.9  | 495.3  | 478.5  | 0.67 | 4.1E-03 |
| 5S     |                                                               | 4.7    | 6.9    | 36.7   | 1.9    | 4.5    | 25.4   | 0.57 | 6.6E-01 |
| 23S    |                                                               | 13.7   | 7.5    | 12.2   | 16.3   | 9.1    | 22.1   | 1.38 | 4.5E-01 |
| BFt56  | tRNA-Ala-TGC                                                  | 87.0   | 97.6   | 97.6   | 47.1   | 45.1   | 95.3   | 0.62 | 1.8E-01 |
| BFt57  | tRNA-Ile-GAT                                                  | 158.9  | 177.9  | 180.8  | 63.0   | 65.0   | 113.6  | 0.45 | 3.1E-02 |
| 16S    |                                                               | 672.5  | 32.3   | 99.0   | 90.9   | 32.3   | 230.2  | 0.68 | 7.8E-01 |
| BF3906 | hypothetical protein                                          | 212.1  | 195.1  | 172.1  | 177.9  | 179.7  | 260.5  | 1.05 | 7.8E-01 |
| BF3907 | hypothetical protein                                          | 0.9    | 0.0    | 2.1    | 0.0    | 0.0    | 0.0    |      |         |
| BF3908 | putative 5,10-methylenetetrahydrofolate reductase             | 331.6  | 336.6  | 339.7  | 341.8  | 357.6  | 334.7  | 1.03 | 3.6E-01 |
| BF3909 | putative DNA polymerase III delta prime subunit               | 217.0  | 227.9  | 222.1  | 218.5  | 211.1  | 191.1  | 0.93 | 2.2E-01 |
| BF3910 | hypothetical protein                                          | 246.1  | 242.9  | 232.9  | 226.4  | 196.0  | 201.0  | 0.86 | 6.1E-02 |
| gldH   | putative gliding motility protein                             | 167.1  | 187.3  | 191.8  | 95.9   | 120.6  | 140.9  | 0.65 | 4.2E-02 |
| mrdB   | putative transmembrane rod shape-determining protein          | 150.9  | 146.2  | 143.6  | 90.6   | 99.6   | 95.7   | 0.65 | 1.0E-03 |
| mrdA   | putative penicillin-binding protein 2                         | 157.5  | 136.2  | 134.7  | 91.1   | 91.5   | 102.6  | 0.67 | 8.9E-03 |
| BF3914 | putative transmembrane protein                                | 155.2  | 126.6  | 135.4  | 87.3   | 88.2   | 89.1   | 0.64 | 5.7E-03 |
| BF3915 | putative rod shape-determining protein MreC                   | 206.7  | 201.2  | 200.3  | 153.8  | 173.1  | 162.7  | 0.80 | 1.0E-02 |
| mreB   | putative rod-shape determining protein                        | 522.8  | 475.0  | 472.9  | 439.9  | 477.1  | 515.8  | 0.97 | 7.1E-01 |

|        |                                                                                           |        |        |        |        |        |        |      |         |
|--------|-------------------------------------------------------------------------------------------|--------|--------|--------|--------|--------|--------|------|---------|
| purH   | bifunctional phosphoribosylaminoimidazolecarboxamide formyltransferase/IMP cyclohydrolase | 589.6  | 609.1  | 583.9  | 575.8  | 553.1  | 571.8  | 0.95 | 9.2E-02 |
| pepO   | putative endopeptidase                                                                    | 309.1  | 291.0  | 281.5  | 299.8  | 305.3  | 314.3  | 1.04 | 3.0E-01 |
| BF3919 | putative ATP-binding component of ABC transporter                                         | 135.9  | 108.9  | 121.5  | 121.5  | 117.6  | 144.9  | 1.05 | 6.9E-01 |
| BF3920 | hypothetical protein                                                                      | 1.1    | 1.3    | 1.8    | 0.8    | 0.8    | 0.9    | 0.62 | 5.4E-02 |
| BF3921 | hypothetical protein                                                                      | 7.4    | 2.2    | 2.3    | 1.0    | 2.4    | 0.0    | 0.46 | 3.5E-01 |
| BF3922 | hypothetical protein                                                                      | 608.1  | 671.1  | 572.8  | 976.2  | 955.2  | 1003.3 | 1.59 | 2.9E-03 |
| BF3923 | hypothetical protein                                                                      | 164.1  | 164.5  | 144.5  | 95.4   | 93.5   | 102.3  | 0.62 | 2.9E-03 |
| BF3924 | hypothetical protein                                                                      | 169.0  | 175.9  | 153.4  | 103.7  | 95.9   | 109.9  | 0.62 | 4.2E-03 |
| BF3925 | putative two-component system sensor histidine kinase/response regulator fusion protein   | 162.2  | 171.7  | 158.8  | 112.1  | 109.1  | 118.1  | 0.69 | 1.8E-03 |
| BF3926 | putative transmembrane transport efflux protein                                           | 261.9  | 275.3  | 283.1  | 156.5  | 181.6  | 155.4  | 0.60 | 3.3E-03 |
| BF3927 | putative protease                                                                         | 386.7  | 388.3  | 368.8  | 239.7  | 256.5  | 254.3  | 0.66 | 7.4E-04 |
| BF3928 | putative peptidyl-prolyl cis-trans isomerase                                              | 455.6  | 442.6  | 470.0  | 314.8  | 330.3  | 280.9  | 0.68 | 5.4E-03 |
| BF3929 | putative two-component response regulator transcriptional regulatory protein              | 120.9  | 115.2  | 116.1  | 97.1   | 98.3   | 96.0   | 0.83 | 1.8E-03 |
| BF3930 | hypothetical protein                                                                      | 2058.0 | 2040.9 | 2151.0 | 78.0   | 106.1  | 91.5   | 0.04 | 8.7E-05 |
| BF3931 | putative ribosomal large subunit pseudouridine synthase                                   | 417.0  | 488.9  | 534.5  | 681.8  | 763.5  | 784.6  | 1.55 | 1.6E-02 |
| fabG   | putative 3-oxoacyl-[acyl-carrier protein] reductase                                       | 882.3  | 889.4  | 997.3  | 1740.2 | 1709.8 | 1540.3 | 1.80 | 2.1E-03 |
| BF3933 | putative TetR-family transcriptional regulator                                            | 340.2  | 303.4  | 308.9  | 189.6  | 158.4  | 174.9  | 0.55 | 2.9E-03 |
| BFt58  | tRNA-Met-CAT                                                                              | 7.0    | 2.5    | 17.9   | 8.8    | 5.4    | 20.0   | 1.46 | 6.8E-01 |
| BF3934 | hypothetical protein                                                                      | 38.1   | 24.3   | 31.6   | 16.4   | 26.1   | 29.2   | 0.75 | 3.4E-01 |
| BF3935 | putative transmembrane protein                                                            | 3.2    | 2.2    | 2.3    | 0.2    | 2.1    | 0.9    | 0.29 | 2.0E-01 |
| BF3936 | putative ABC transporter transmembrane component                                          | 3.5    | 3.1    | 4.3    | 1.9    | 4.1    | 2.6    | 0.75 | 3.8E-01 |
| BF3937 | hypothetical protein                                                                      | 3.5    | 2.4    | 2.9    | 1.9    | 2.5    | 1.9    | 0.72 | 1.1E-01 |
| BF3938 | hypothetical protein                                                                      | 7.7    | 5.9    | 5.6    | 8.4    | 6.7    | 8.5    | 1.23 | 2.4E-01 |
| BF3939 | putative GntR family transcriptional regulator                                            | 6.7    | 16.3   | 10.5   | 6.8    | 10.0   | 3.7    | 0.60 | 3.3E-01 |
| BF3940 | putative transmembrane protein                                                            | 8.2    | 7.1    | 8.1    | 7.8    | 8.5    | 7.1    | 1.00 | 9.6E-01 |
| BF3941 | putative ATP-binding component of ABC transporter                                         | 6.6    | 5.9    | 8.6    | 5.8    | 8.8    | 6.9    | 1.02 | 9.3E-01 |
| BF3942 | putative TPR-repeat family protein                                                        | 41.8   | 49.5   | 45.7   | 19.0   | 19.1   | 17.9   | 0.41 | 6.0E-04 |
| BF3943 | hypothetical protein                                                                      | 53.4   | 61.6   | 61.5   | 30.5   | 28.7   | 27.7   | 0.49 | 1.3E-03 |
| BF3944 | putative TonB-family outer membrane receptor protein                                      | 54.7   | 58.2   | 55.5   | 28.7   | 28.8   | 26.3   | 0.50 | 3.9E-04 |
| BF3945 | hypothetical protein                                                                      | 39.0   | 42.7   | 46.9   | 20.6   | 24.5   | 22.1   | 0.52 | 3.6E-03 |
| BF3946 | hypothetical protein                                                                      | 28.8   | 34.1   | 28.2   | 22.9   | 21.9   | 19.8   | 0.71 | 2.1E-02 |
| BF3947 | putative transmembrane MotA/TolQ/ExbB proton channel family protein                       | 44.5   | 50.6   | 53.5   | 29.4   | 29.4   | 26.7   | 0.58 | 3.9E-03 |



|        |                                                            |        |        |        |        |        |        |      |         |
|--------|------------------------------------------------------------|--------|--------|--------|--------|--------|--------|------|---------|
| BF3948 | hypothetical protein                                       | 994.7  | 1170.5 | 1117.2 | 276.5  | 306.9  | 277.9  | 0.26 | 3.0E-04 |
| 5S     |                                                            | 530.5  | 7.9    | 40.9   | 1.9    | 5.2    | 26.8   | 0.12 | 2.7E-01 |
| 23S    |                                                            | 281.3  | 180.6  | 242.6  | 645.1  | 239.0  | 1088.6 | 2.39 | 1.9E-01 |
| BFt59  | tRNA-Ala-TGC                                               | 87.0   | 97.6   | 97.6   | 47.1   | 45.1   | 95.3   | 0.62 | 1.8E-01 |
| BFt60  | tRNA-Ile-GAT                                               | 158.9  | 177.9  | 180.8  | 63.0   | 65.0   | 113.6  | 0.45 | 3.1E-02 |
| 16S    |                                                            | 672.5  | 32.3   | 99.0   | 90.9   | 32.3   | 230.2  | 0.68 | 7.8E-01 |
| BF3949 | putative transmembrane protein                             | 460.4  | 131.9  | 402.1  | 51.6   | 49.5   | 83.2   | 0.21 | 4.0E-02 |
| BF3950 | hypothetical protein                                       | 63.1   | 67.6   | 71.2   | 61.3   | 55.8   | 49.8   | 0.82 | 8.2E-02 |
| BF3951 | hypothetical protein                                       | 74.1   | 69.0   | 69.3   | 50.5   | 50.1   | 53.2   | 0.72 | 2.0E-03 |
| BF3954 | hypothetical protein                                       | 68.5   | 49.1   | 65.6   | 52.0   | 64.1   | 54.4   | 0.94 | 6.8E-01 |
| BF3955 | hypothetical protein                                       | 43.3   | 28.3   | 38.2   | 13.5   | 15.1   | 16.6   | 0.42 | 9.4E-03 |
| BF3956 | hypothetical protein                                       | 19.9   | 22.9   | 25.5   | 14.9   | 18.2   | 15.1   | 0.71 | 4.3E-02 |
| BF3957 | hypothetical protein                                       | 30.6   | 30.0   | 29.1   | 23.3   | 34.0   | 34.0   | 1.00 | 9.9E-01 |
| BF3958 | putative transmembrane polysaccharide modification protein | 87.2   | 74.8   | 86.7   | 52.9   | 60.1   | 57.9   | 0.69 | 1.1E-02 |
| BF3959 | hypothetical protein                                       | 67.5   | 52.5   | 61.4   | 32.9   | 36.7   | 54.3   | 0.67 | 1.2E-01 |
| BF3960 | putative transmembrane protein                             | 160.2  | 141.4  | 141.5  | 100.8  | 91.5   | 111.4  | 0.68 | 1.5E-02 |
| BF3961 | hypothetical protein                                       | 136.2  | 153.9  | 112.4  | 105.8  | 86.2   | 161.2  | 0.85 | 5.6E-01 |
| BF3962 | putative transmembrane Acr-type transport protein          | 147.8  | 162.1  | 130.9  | 122.1  | 115.2  | 123.5  | 0.82 | 6.8E-02 |
| BF3963 | putative membrane fusion protein transporter               | 119.2  | 107.4  | 94.2   | 105.7  | 98.8   | 96.2   | 0.94 | 5.3E-01 |
| BF3964 | putative outer membrane efflux protein                     | 118.8  | 107.1  | 98.0   | 97.6   | 93.0   | 93.5   | 0.88 | 1.3E-01 |
| BF3965 | putative TetR transcriptional regulator                    | 80.4   | 78.3   | 71.4   | 70.8   | 57.0   | 50.1   | 0.77 | 1.1E-01 |
| hutH   | putative histidine ammonia-lyase                           | 7.1    | 8.3    | 6.6    | 37.1   | 33.4   | 35.3   | 4.83 | 3.3E-04 |
| BF3967 | putative formiminotransferase-cycloaminase                 | 5.9    | 10.7   | 5.9    | 35.3   | 29.2   | 39.8   | 4.80 | 6.6E-03 |
| hutI   | putative imidazolonepropionase                             | 8.4    | 7.8    | 7.4    | 23.9   | 21.5   | 28.9   | 3.12 | 1.5E-03 |
| ftcD   | putative formimidoyltransferase-cycloaminase               | 7.6    | 10.6   | 11.2   | 23.5   | 26.0   | 25.5   | 2.58 | 5.4E-03 |
| hutU   | urocanate hydratase                                        | 37.5   | 35.2   | 28.4   | 41.4   | 40.9   | 55.8   | 1.36 | 1.2E-01 |
| BF3971 | hypothetical protein                                       | 296.9  | 301.5  | 259.4  | 169.9  | 167.8  | 232.1  | 0.66 | 4.3E-02 |
| BF3972 | putative transmembrane DNA mismatch repair-like protein    | 94.2   | 89.7   | 93.2   | 64.5   | 64.6   | 69.8   | 0.72 | 1.9E-03 |
| BF3973 | putative transmembrane protein                             | 278.7  | 270.1  | 291.1  | 691.2  | 653.3  | 494.4  | 2.17 | 6.1E-03 |
| BF3974 | hypothetical protein                                       | 589.0  | 558.9  | 494.3  | 633.3  | 626.9  | 606.6  | 1.14 | 1.1E-01 |
| rplQ   | putative 50S ribosomal protein L17                         | 5126.2 | 5644.2 | 5941.0 | 4573.2 | 4710.0 | 3827.2 | 0.78 | 6.0E-02 |
| rpoA   | DNA-directed RNA polymerase alpha subunit                  | 3931.9 | 4466.9 | 4645.2 | 3602.6 | 3894.3 | 3322.6 | 0.83 | 8.4E-02 |
| rpsD   | 30S ribosomal protein S4                                   | 3457.1 | 3777.6 | 3953.4 | 3788.2 | 4001.8 | 3558.4 | 1.01 | 8.3E-01 |
| rpsK   | 30S ribosomal protein S11                                  | 3011.0 | 3185.4 | 3341.5 | 3163.8 | 3145.5 | 2675.9 | 0.94 | 4.5E-01 |
| rpsM   | 30S ribosomal protein S13                                  | 2686.6 | 2648.8 | 2867.1 | 2754.8 | 2699.7 | 2608.0 | 0.98 | 6.6E-01 |
| rpmJ   | putative 50S ribosomal protein L36                         | 1416.1 | 1652.3 | 1622.5 | 1475.1 | 1510.3 | 1296.3 | 0.91 | 3.2E-01 |
| infA   | translation initiation factor IF-1                         | 1445.5 | 1525.5 | 1510.9 | 983.6  | 1083.9 | 1014.9 | 0.69 | 1.8E-03 |
| map    | putative methionine aminopeptidase                         | 3128.6 | 3104.6 | 3223.3 | 2353.3 | 2475.5 | 2112.6 | 0.73 | 8.6E-03 |
| secY   | preprotein translocase SecY                                | 3904.0 | 4570.0 | 4449.2 | 2662.0 | 3031.1 | 2513.9 | 0.63 | 9.9E-03 |
| rplO   | putative 50S ribosomal protein L15                         | 3908.8 | 4651.5 | 4434.6 | 2819.1 | 3345.9 | 2958.0 | 0.70 | 1.9E-02 |
| rpmD   | putative 50S ribosomal protein L30                         | 3211.0 | 3064.5 | 3104.4 | 2077.7 | 2048.7 | 1714.8 | 0.62 | 5.6E-03 |
| rpsE   | putative 30S ribosomal protein S5                          | 2932.4 | 3007.0 | 3033.2 | 2215.6 | 2289.7 | 2141.6 | 0.74 | 1.1E-03 |
| rplR   | putative 50S ribosomal protein L18                         | 3488.1 | 3531.3 | 3583.6 | 2560.9 | 2649.8 | 2177.0 | 0.69 | 1.1E-02 |
| rplF   | 50S ribosomal protein L6                                   | 3487.6 | 3705.7 | 3642.0 | 2615.1 | 2831.0 | 2348.2 | 0.72 | 1.2E-02 |

|        |                                                             |         |         |         |         |         |         |      |         |
|--------|-------------------------------------------------------------|---------|---------|---------|---------|---------|---------|------|---------|
| rpsH   | putative 30S ribosomal protein S8                           | 3742.9  | 3951.4  | 3822.7  | 2708.7  | 2935.4  | 2319.0  | 0.69 | 1.5E-02 |
| rpsN   | putative 30S ribosomal protein S14                          | 3854.3  | 3951.5  | 3972.8  | 3020.9  | 3189.0  | 2989.4  | 0.78 | 1.9E-03 |
| rplE   | 50S ribosomal protein L5                                    | 3152.4  | 3365.3  | 3442.4  | 2651.2  | 2806.2  | 2522.2  | 0.80 | 1.4E-02 |
| rplX   | 50S ribosomal protein L24                                   | 3938.0  | 3704.6  | 3889.7  | 3322.3  | 3410.5  | 3073.4  | 0.85 | 2.4E-02 |
| rplN   | 50S ribosomal protein L14                                   | 2907.6  | 2898.9  | 2958.6  | 2721.5  | 2813.2  | 2615.0  | 0.93 | 5.3E-02 |
| rpsQ   | putative 30S ribosomal protein S17                          | 3365.0  | 2993.3  | 3162.1  | 2908.7  | 2923.6  | 2490.3  | 0.87 | 1.4E-01 |
| rpmC   | 50S ribosomal protein L29                                   | 2452.5  | 2271.2  | 2404.2  | 2049.1  | 2148.1  | 1781.7  | 0.84 | 7.1E-02 |
| rplP   | 50S ribosomal protein L16                                   | 2389.2  | 2168.1  | 2415.6  | 1991.8  | 2129.3  | 1951.2  | 0.87 | 5.8E-02 |
| rpsC   | putative 30S ribosomal protein S3                           | 3327.6  | 2718.3  | 3025.6  | 2402.7  | 2431.5  | 2272.9  | 0.79 | 3.5E-02 |
| rplV   | putative 50S ribosomal protein L22                          | 3477.2  | 3025.1  | 3173.1  | 2590.1  | 2637.4  | 2380.3  | 0.79 | 2.2E-02 |
| rpsS   | 30S ribosomal protein S19                                   | 2265.8  | 2282.8  | 2373.4  | 1852.6  | 1861.3  | 1826.3  | 0.80 | 9.3E-04 |
| rplB   | 50S ribosomal protein L2                                    | 2314.0  | 2264.5  | 2276.5  | 2138.0  | 2124.1  | 2199.8  | 0.94 | 2.1E-02 |
| rplW   | putative 50S ribosomal protein L23                          | 2894.2  | 2855.3  | 2980.6  | 2044.2  | 2349.7  | 1951.6  | 0.72 | 1.3E-02 |
| rplD   | 50S ribosomal protein L4                                    | 2152.9  | 2089.1  | 2087.4  | 1575.5  | 1721.3  | 1643.4  | 0.78 | 3.4E-03 |
| rplC   | 50S ribosomal protein L3                                    | 2783.8  | 2507.4  | 2676.2  | 2004.7  | 2137.4  | 2069.9  | 0.78 | 7.0E-03 |
| rpsJ   | 30S ribosomal protein S10                                   | 2724.6  | 2602.5  | 2596.4  | 1852.2  | 2040.2  | 1942.8  | 0.74 | 2.9E-03 |
| fusA   | elongation factor EF-2                                      | 2763.8  | 2896.8  | 2860.3  | 2381.7  | 2566.5  | 2409.4  | 0.86 | 1.4E-02 |
| rpsG   | 30S ribosomal protein S7                                    | 1952.4  | 2124.8  | 2168.3  | 2058.4  | 2083.2  | 1839.0  | 0.96 | 5.1E-01 |
| rpsL   | 30S ribosomal protein S12                                   | 1393.6  | 1506.6  | 1428.3  | 1754.7  | 1454.9  | 1660.8  | 1.12 | 1.8E-01 |
| BF4008 | hypothetical protein                                        | 140.3   | 119.7   | 115.2   | 104.5   | 89.0    | 81.4    | 0.73 | 5.4E-02 |
| BF4009 | hypothetical protein                                        | 44.7    | 48.7    | 57.6    | 15.5    | 17.7    | 14.6    | 0.32 | 1.4E-03 |
| BF4010 | hypothetical protein                                        | 1406.9  | 1423.8  | 1375.7  | 581.8   | 481.4   | 540.9   | 0.38 | 5.9E-04 |
| BF4011 | putative transmembrane protein, transglycosylase associated | 459.1   | 534.8   | 443.9   | 55.7    | 63.9    | 97.7    | 0.15 | 2.1E-03 |
| BF4012 | hypothetical protein                                        | 15.2    | 19.5    | 14.5    | 26.9    | 37.3    | 24.9    | 1.80 | 3.7E-02 |
| BF4013 | putative transmembrane protein                              | 15.7    | 18.0    | 17.8    | 55.5    | 63.1    | 47.3    | 3.21 | 1.4E-03 |
| rpoC   | DNA-directed RNA polymerase beta' subunit                   | 1784.8  | 1908.1  | 1775.2  | 1269.0  | 1308.9  | 1263.8  | 0.70 | 1.1E-03 |
| rpoB   | DNA-directed RNA polymerase beta subunit                    | 2142.6  | 2407.2  | 2296.2  | 1567.4  | 1656.1  | 1494.9  | 0.69 | 4.4E-03 |
| rplL   | putative 50S ribosomal protein L7/L12                       | 6830.4  | 7486.0  | 7739.4  | 7415.1  | 7846.9  | 7993.9  | 1.06 | 3.5E-01 |
| rplJ   | putative 50S ribosomal protein L10                          | 5521.6  | 6442.9  | 6606.3  | 5723.9  | 6238.6  | 5014.3  | 0.91 | 4.2E-01 |
| rplA   | 50S ribosomal protein L1                                    | 6326.0  | 7181.6  | 7366.2  | 7518.5  | 7800.7  | 6326.7  | 1.04 | 7.4E-01 |
| rplK   | 50S ribosomal protein L11                                   | 5972.4  | 6303.2  | 6681.5  | 7074.8  | 7205.3  | 6145.4  | 1.08 | 3.6E-01 |
| nusG   | putative transcription antitermination protein              | 6539.5  | 6680.0  | 7367.4  | 7588.5  | 7943.6  | 7294.5  | 1.11 | 1.2E-01 |
| secE   | putative preprotein translocase SecE subunit                | 4331.4  | 4597.4  | 5200.6  | 5337.6  | 5403.0  | 4542.3  | 1.08 | 4.4E-01 |
| BFt61  | tRNA-Trp-CCA                                                | 153.2   | 185.2   | 245.4   | 525.9   | 564.5   | 487.8   | 2.75 | 6.7E-03 |
| tuf    | elongation factor Tu                                        | 12627.2 | 12769.8 | 14333.3 | 17495.8 | 17558.2 | 16485.0 | 1.30 | 1.2E-02 |
| BFt62  | tRNA-Thr-GGT                                                | 276.9   | 292.0   | 242.9   | 348.4   | 238.3   | 322.1   | 1.11 | 5.4E-01 |
| BFt63  | tRNA-Gly-TCC                                                | 0.0     | 0.0     | 0.0     | 0.0     | 0.0     | 0.0     |      |         |
| BFt64  | tRNA-Tyr-GTA                                                | 83.4    | 85.1    | 136.2   | 363.3   | 338.7   | 461.7   | 3.89 | 6.1E-03 |
| BFt65  | tRNA-Thr-TGT                                                | 106.9   | 167.4   | 100.1   | 178.8   | 143.3   | 310.0   | 1.64 | 2.1E-01 |
| BF4023 | putative sigma(54) modulation protein                       | 2464.5  | 2106.5  | 2393.2  | 1796.1  | 2108.3  | 1925.2  | 0.84 | 9.1E-02 |
| BF4024 | putative site-specific recombinase                          | 4165.4  | 3817.8  | 4150.6  | 3302.6  | 3749.0  | 3570.0  | 0.87 | 7.6E-02 |
| BF4025 | putative ribosomal protein S21                              | 1052.3  | 1127.1  | 1365.2  | 1104.5  | 1328.9  | 1535.0  | 1.12 | 4.9E-01 |
| BF4027 | putative peptidase                                          | 145.1   | 145.9   | 147.8   | 146.2   | 147.4   | 145.3   | 1.00 | 9.7E-01 |
| BF4028 | putative hexapeptide repeat protein                         | 209.8   | 206.3   | 224.2   | 183.9   | 180.8   | 173.9   | 0.84 | 1.2E-02 |
| kdtA   | 3-deoxy-D-manno-octulosonic-acid transferase                | 299.3   | 280.5   | 285.2   | 252.6   | 273.9   | 264.2   | 0.91 | 7.0E-02 |

|               |                                                                                         |             |             |             |              |              |              |              |                |
|---------------|-----------------------------------------------------------------------------------------|-------------|-------------|-------------|--------------|--------------|--------------|--------------|----------------|
| gltX          | glutamyl-tRNA synthetase                                                                | 356.4       | 330.5       | 332.5       | 330.8        | 323.4        | 372.2        | 1.01         | 9.4E-01        |
| BF4031        | putative transmembrane HD family protein                                                | 137.9       | 150.2       | 136.2       | 166.5        | 162.2        | 158.3        | 1.15         | 3.1E-02        |
| BF4032        | putative low molecular weight protein-tyrosine-phosphatase                              | 68.5        | 68.5        | 61.9        | 97.0         | 111.6        | 113.2        | 1.62         | 4.8E-03        |
| BF4033        | hypothetical protein                                                                    | 116.8       | 141.3       | 121.8       | 301.9        | 299.6        | 294.1        | 2.37         | 8.7E-04        |
| BF4034        | putative primosomal protein N'                                                          | 114.4       | 120.4       | 92.3        | 102.2        | 86.9         | 116.0        | 0.93         | 6.5E-01        |
| BF4035        | putative transmembrane protein                                                          | 1331.2      | 1214.0      | 1348.0      | 1003.4       | 1131.9       | 933.2        | 0.79         | 4.0E-02        |
| BFt66         | tRNA-Pseudo-CGA                                                                         | 48.5        | 37.1        | 23.5        | 31.2         | 24.7         | 35.3         | 0.86         | 6.4E-01        |
| BF4036        | hypothetical protein                                                                    | 65.0        | 61.0        | 56.5        | 60.2         | 63.3         | 73.6         | 1.08         | 4.3E-01        |
| aspA          | putative aspartate ammonia-lyase                                                        | 28.1        | 33.9        | 31.0        | 14.6         | 15.5         | 16.1         | 0.50         | 1.8E-03        |
| BF4038        | anaerobic C4-dicarboxylate transporter                                                  | 55.9        | 63.3        | 55.7        | 46.9         | 42.7         | 63.3         | 0.86         | 3.8E-01        |
| ansB          | putative L-asparaginase II precursor                                                    | 108.8       | 119.8       | 94.3        | 80.1         | 78.7         | 82.2         | 0.75         | 3.1E-02        |
| BF4040        | hypothetical protein                                                                    | 103.2       | 117.1       | 107.9       | 53.6         | 56.4         | 60.4         | 0.52         | 1.2E-03        |
| BF4041        | putative transposase                                                                    | 50.9        | 52.0        | 44.3        | 15.1         | 18.2         | 15.8         | 0.33         | 9.1E-04        |
| BF4042        | hypothetical protein                                                                    | 0.7         | 0.4         | 0.4         | 0.3          | 0.8          | 0.3          | 0.97         | 9.4E-01        |
| BF4048        | putative two-component system sensor histidine kinase/response regulator fusion protein | 156.6       | 143.5       | 144.0       | 252.8        | 265.4        | 209.7        | 1.63         | 9.1E-03        |
| tnpB          | putative IstB/TnpB insertion sequence IS21-like protein                                 | 4.0         | 4.7         | 4.7         | 8.2          | 4.1          | 6.2          | 1.33         | 3.0E-01        |
| nanH2         | putative neuraminidase precursor                                                        | 4.1         | 5.7         | 4.2         | 129.6        | 137.6        | 117.4        | 27.75        | 1.7E-04        |
| BF4052        | putative transposase                                                                    | 0.9         | 0.6         | 1.1         | 16.2         | 13.8         | 15.8         | 18.75        | 7.6E-04        |
| BF4053        | hypothetical protein                                                                    | 0.7         | 1.5         | 1.8         | 9.4          | 9.7          | 10.0         | 7.92         | 6.5E-03        |
| BF4054        | putative transmembrane sugar transporter                                                | 0.6         | 0.5         | 0.8         | 2.6          | 2.1          | 4.0          | 4.75         | 8.6E-03        |
| BF4055        | hypothetical protein                                                                    | 0.5         | 0.3         | 0.7         | 2.1          | 1.8          | 1.9          | 4.08         | 8.2E-03        |
| <b>BF4056</b> | <b>putative outer membrane protein</b>                                                  | <b>7.0</b>  | <b>5.2</b>  | <b>5.1</b>  | <b>383.8</b> | <b>399.2</b> | <b>407.7</b> | <b>69.46</b> | <b>4.5E-05</b> |
| BF4057        | putative outer membrane protein                                                         | 4.0         | 2.6         | 2.6         | 126.8        | 143.1        | 154.7        | 46.88        | 2.4E-04        |
| BF4058        | putative endo-beta-galactosidase                                                        | 8.3         | 7.4         | 7.5         | 302.2        | 318.7        | 320.3        | 40.72        | 2.3E-06        |
| BF4059        | putative beta-hexosaminidase precursor                                                  | 6.7         | 5.2         | 5.5         | 220.0        | 223.2        | 242.6        | 39.46        | 3.7E-05        |
| BF4060        | putative beta-glucanase                                                                 | 9.4         | 6.8         | 9.0         | 226.1        | 258.9        | 289.6        | 30.89        | 1.8E-04        |
| BF4061        | putative beta-galactosidase                                                             | 24.1        | 18.8        | 20.6        | 866.8        | 823.9        | 879.8        | 40.66        | 2.6E-05        |
| <b>BF4062</b> | <b>putative TonB-linked outer membrane protein</b>                                      | <b>14.0</b> | <b>11.4</b> | <b>10.9</b> | <b>914.7</b> | <b>801.8</b> | <b>975.6</b> | <b>74.47</b> | <b>3.7E-05</b> |
| BF4063        | putative outer membrane protein                                                         | 15.3        | 12.0        | 10.3        | 1041.8       | 836.7        | 1281.3       | 83.72        | 1.9E-04        |
| BF4064        | hypothetical protein                                                                    | 9.7         | 9.2         | 9.5         | 360.6        | 335.7        | 446.2        | 39.97        | 4.4E-05        |
| BF4065        | hypothetical protein                                                                    | 12.9        | 12.3        | 7.2         | 331.9        | 300.2        | 454.8        | 34.21        | 7.3E-04        |
| BF4069        | hypothetical protein                                                                    | 7.6         | 6.1         | 6.8         | 3.1          | 1.6          | 3.6          | 0.39         | 4.0E-02        |
| BF4070        | hypothetical protein                                                                    | 23.7        | 19.1        | 19.8        | 21.7         | 12.3         | 12.5         | 0.72         | 2.3E-01        |
| BF4071        | putative IstB IS21 family transposase protein                                           | 19.1        | 15.6        | 19.3        | 16.6         | 17.3         | 16.3         | 0.93         | 4.5E-01        |
| BF4073        | hypothetical protein                                                                    | 70.3        | 65.4        | 70.0        | 87.8         | 98.6         | 72.0         | 1.25         | 1.2E-01        |
| BF4074        | hypothetical protein                                                                    | 66.0        | 54.6        | 64.8        | 98.1         | 110.3        | 90.5         | 1.61         | 1.2E-02        |
| BF4075        | possible recombination enzyme                                                           | 1.4         | 1.9         | 1.8         | 1.0          | 0.3          | 0.3          | 0.27         | 5.8E-02        |
| BF4076        | hypothetical protein                                                                    | 0.7         | 1.8         | 0.2         | 0.5          | 0.6          | 0.3          | 0.74         | 7.3E-01        |
| BF4077        | hypothetical protein                                                                    | 1.7         | 2.3         | 1.8         | 0.7          | 1.0          | 0.9          | 0.44         | 1.2E-02        |
| BF4078        | hypothetical protein                                                                    | 15.9        | 10.1        | 8.2         | 5.0          | 3.7          | 1.0          | 0.24         | 8.8E-02        |
| BF4079        | putative transmembrane protein                                                          | 76.0        | 75.7        | 79.9        | 108.7        | 117.3        | 89.8         | 1.36         | 3.8E-02        |
| BF4080        | putative bacteriophage integrase                                                        | 321.1       | 278.0       | 323.1       | 389.4        | 402.9        | 401.1        | 1.30         | 1.6E-02        |

|        |                                                                          |       |       |       |        |        |        |      |         |
|--------|--------------------------------------------------------------------------|-------|-------|-------|--------|--------|--------|------|---------|
| BF4081 | hypothetical protein                                                     | 543.7 | 529.2 | 513.8 | 1188.7 | 1164.1 | 1117.8 | 2.19 | 1.1E-04 |
| BF4082 | putative vitamin B12 related Cobalamin adenosyltransferase               | 102.9 | 108.2 | 102.7 | 115.0  | 103.6  | 102.6  | 1.02 | 6.7E-01 |
| BF4083 | hypothetical protein                                                     | 56.7  | 53.5  | 51.9  | 91.6   | 86.6   | 77.9   | 1.58 | 4.2E-03 |
| BF4084 | hypothetical protein                                                     | 38.3  | 35.3  | 35.0  | 7.6    | 6.6    | 8.1    | 0.20 | 2.3E-04 |
| BF4085 | hypothetical protein                                                     | 2.1   | 3.3   | 1.7   | 0.0    | 0.0    | 0.9    | 0.39 |         |
| BF4086 | hypothetical protein                                                     | 1.8   | 1.2   | 1.8   | 1.0    | 0.6    | 1.0    | 0.56 | 9.8E-02 |
| BF4087 | hypothetical protein                                                     | 1.0   | 0.9   | 1.0   | 0.3    | 0.7    | 0.4    | 0.47 | 4.0E-02 |
| tsr26  | tyrosine site-specific recombinase                                       | 9.3   | 7.0   | 5.8   | 8.2    | 8.3    | 6.7    | 1.07 | 7.5E-01 |
| BF4089 | hypothetical protein                                                     | 2.4   | 2.7   | 3.3   | 7.7    | 9.1    | 8.9    | 3.08 | 2.2E-03 |
| BF4090 | hypothetical protein                                                     | 4.2   | 1.7   | 1.7   | 4.2    | 4.3    | 4.8    | 1.92 | 1.4E-01 |
| BF4091 | putative O-antigen related protein                                       | 16.4  | 22.2  | 20.0  | 42.3   | 39.6   | 53.2   | 2.31 | 8.1E-03 |
| BF4092 | hypothetical protein                                                     | 3.9   | 2.7   | 3.0   | 2.7    | 2.6    | 2.9    | 0.86 | 3.3E-01 |
| BF4093 | hypothetical protein                                                     | 1.6   | 2.2   | 2.7   | 1.5    | 1.2    | 1.0    | 0.57 | 7.8E-02 |
| BF4094 | possible bacterial surface protein                                       | 1.6   | 1.8   | 1.8   | 1.2    | 1.6    | 1.7    | 0.83 | 2.5E-01 |
| BF4095 | hypothetical protein                                                     | 1.3   | 1.6   | 1.1   | 0.7    | 1.2    | 1.0    | 0.70 | 1.9E-01 |
| BF4096 | hypothetical protein                                                     | 1.8   | 2.1   | 2.2   | 1.0    | 1.9    | 0.5    | 0.49 | 1.9E-01 |
| BF4097 | hypothetical protein                                                     | 1.6   | 1.9   | 1.9   | 2.1    | 1.4    | 1.3    | 0.90 | 6.2E-01 |
| BF4098 | hypothetical protein                                                     | 8.9   | 9.9   | 13.0  | 4.2    | 3.9    | 5.0    | 0.41 | 8.7E-03 |
| BF4099 | putative NUDIX/MuT-family protein                                        | 71.8  | 51.8  | 51.2  | 103.4  | 92.6   | 93.4   | 1.68 | 2.5E-02 |
| BF4100 | hypothetical protein                                                     | 83.0  | 86.6  | 93.2  | 91.6   | 139.9  | 71.1   | 1.11 | 6.9E-01 |
| BF4101 | hypothetical protein                                                     | 18.3  | 27.1  | 19.3  | 30.1   | 23.9   | 16.8   | 1.08 | 7.7E-01 |
| BF4102 | putative two-component sensor histidine kinase transcriptional regulator | 8.2   | 7.7   | 9.7   | 4.8    | 2.9    | 4.8    | 0.48 | 3.1E-02 |
| BF4103 | putative two-component response regulator autolysis regulator LytR       | 4.6   | 5.2   | 5.6   | 5.0    | 6.9    | 5.1    | 1.10 | 5.3E-01 |
| BF4104 | putative transmembrane ferredoxin-like protein                           | 4.5   | 4.2   | 3.4   | 6.8    | 8.0    | 6.5    | 1.77 | 1.5E-02 |
| BF4105 | putative aldo/keto reductase                                             | 8.0   | 6.2   | 4.9   | 13.9   | 10.3   | 10.8   | 1.84 | 4.2E-02 |
| BF4106 | putative TonB-dependent outer membrane receptor protein                  | 3.3   | 2.9   | 3.4   | 6.5    | 5.9    | 6.0    | 1.93 | 1.6E-03 |
| BF4107 | putative transmembrane protein                                           | 8.9   | 7.3   | 6.8   | 11.7   | 12.7   | 10.6   | 1.52 | 2.7E-02 |
| BF4108 | hypothetical protein                                                     | 29.3  | 23.6  | 26.0  | 21.8   | 27.9   | 25.0   | 0.95 | 6.5E-01 |
| lacA   | putative thiogalactoside transacetylase                                  | 13.2  | 12.4  | 13.9  | 6.8    | 9.7    | 7.8    | 0.61 | 2.3E-02 |
| BF4110 | putative transcriptional regulator GerE, LuxR family                     | 56.1  | 48.7  | 49.0  | 40.8   | 41.7   | 41.3   | 0.81 | 2.2E-02 |
| BF4111 | putative methylated-DNA--protein-cysteine methyltransferase              | 69.0  | 56.4  | 66.6  | 65.1   | 72.8   | 67.8   | 1.07 | 4.4E-01 |
| BF4112 | hypothetical protein                                                     | 22.4  | 20.1  | 23.6  | 23.6   | 22.5   | 26.3   | 1.09 | 3.1E-01 |
| BF4113 | putative AraC-family transcriptional regulator                           | 9.8   | 11.7  | 11.7  | 8.8    | 11.8   | 11.5   | 0.96 | 7.8E-01 |
| BF4114 | 1-deoxy-D-xylulose-5-phosphate synthase                                  | 6.1   | 4.7   | 7.5   | 3.8    | 4.6    | 4.5    | 0.72 | 1.4E-01 |
| BF4115 | flavodoxin                                                               | 2.9   | 1.9   | 3.2   | 2.8    | 2.1    | 1.0    | 0.70 | 4.0E-01 |
| BF4116 | putative transmembrane protein                                           | 1.7   | 0.6   | 1.2   | 0.0    | 0.0    | 0.0    |      |         |
| BF4117 | hypothetical protein                                                     | 58.8  | 72.0  | 67.7  | 51.5   | 64.0   | 53.9   | 0.85 | 2.0E-01 |
| BF4118 | hypothetical protein                                                     | 76.1  | 76.4  | 77.7  | 77.5   | 77.6   | 74.7   | 1.00 | 9.3E-01 |
| BF4119 | hypothetical protein                                                     | 54.9  | 54.8  | 62.6  | 67.3   | 74.9   | 68.6   | 1.22 | 4.1E-02 |
| BF4120 | putative acetyltransferase                                               | 68.1  | 59.0  | 75.7  | 72.8   | 84.3   | 62.2   | 1.08 | 6.2E-01 |
| BF4124 | hypothetical protein                                                     | 25.1  | 23.2  | 24.0  | 23.8   | 24.5   | 17.8   | 0.91 | 4.7E-01 |

|         |                                                                                          |        |        |        |        |        |        |      |         |
|---------|------------------------------------------------------------------------------------------|--------|--------|--------|--------|--------|--------|------|---------|
| BFt67   | tRNA-Leu-CAA                                                                             | 16.8   | 13.4   | 13.9   | 6.0    | 12.2   | 24.2   | 0.83 | 7.2E-01 |
| BF4125  | putative mannose-1-phosphate<br>guanylyltransferase                                      | 734.2  | 696.5  | 734.9  | 818.7  | 856.6  | 707.7  | 1.10 | 2.6E-01 |
| BF4126  | putative Hit-family protein                                                              | 392.1  | 380.0  | 427.9  | 376.6  | 367.2  | 290.9  | 0.86 | 2.2E-01 |
| greA    | putative transcription elongation factor                                                 | 831.4  | 774.2  | 822.8  | 721.5  | 740.3  | 775.0  | 0.92 | 8.8E-02 |
| BF4128  | hypothetical protein                                                                     | 218.3  | 216.4  | 231.4  | 358.9  | 363.4  | 304.8  | 1.54 | 6.6E-03 |
| pnpA    | putative polyribonucleotide<br>nucleotidyltransferase                                    | 1695.1 | 1767.5 | 1799.4 | 1402.2 | 1343.9 | 1292.3 | 0.77 | 3.5E-03 |
| BF4130  | putative RNA polymerase ECF-type<br>sigma factor                                         | 23.5   | 18.6   | 15.3   | 27.6   | 33.3   | 32.3   | 1.64 | 4.2E-02 |
| BF4131  | putative anti-sigma factor                                                               | 25.7   | 27.6   | 27.7   | 48.0   | 51.2   | 46.3   | 1.80 | 7.8E-04 |
| BF4132  | putative outer membrane protein                                                          | 3.2    | 5.1    | 3.7    | 22.1   | 22.7   | 19.2   | 5.41 | 1.8E-03 |
| BF4133  | hypothetical protein                                                                     | 3.5    | 3.3    | 2.3    | 23.0   | 23.4   | 23.1   | 7.83 | 7.4E-04 |
| BF4134  | hypothetical protein                                                                     | 2.0    | 1.6    | 2.3    | 1.2    | 0.9    | 1.3    | 0.57 | 4.1E-02 |
| BF4135  | hypothetical protein                                                                     | 23.4   | 20.0   | 16.2   | 7.8    | 8.4    | 12.0   | 0.47 | 2.5E-02 |
| BF4136  | hypothetical protein                                                                     | 15.8   | 13.6   | 11.2   | 33.0   | 26.9   | 32.7   | 2.29 | 7.1E-03 |
| BF4137  | butyrate kinase                                                                          | 42.8   | 44.2   | 42.7   | 125.9  | 115.5  | 126.4  | 2.83 | 1.0E-04 |
| BF4138  | putative phosphate<br>acetyl/butyryltransferase                                          | 41.0   | 50.2   | 40.0   | 96.0   | 93.3   | 104.6  | 2.25 | 2.5E-03 |
| BF4139  | putative endo-beta-galactosidase                                                         | 66.8   | 68.7   | 64.0   | 179.0  | 169.9  | 144.8  | 2.47 | 1.1E-03 |
| BF4140  | putative muramoyltetrapeptide<br>carboxypeptidase                                        | 51.3   | 57.6   | 57.5   | 132.7  | 127.0  | 134.5  | 2.37 | 3.8E-04 |
| BF4141  | hypothetical protein                                                                     | 264.1  | 247.4  | 231.0  | 230.6  | 211.6  | 227.6  | 0.90 | 1.4E-01 |
| sufE    | putative SufE Fe/S-cluster-related<br>protein                                            | 593.1  | 547.3  | 536.3  | 519.3  | 510.5  | 512.2  | 0.92 | 9.1E-02 |
| BF4143  | putative DNA-binding protein                                                             | 105.3  | 98.8   | 95.4   | 199.5  | 191.7  | 208.6  | 2.00 | 4.9E-04 |
| BF4144  | putative transmembrane protein                                                           | 45.6   | 47.3   | 48.0   | 98.1   | 105.8  | 91.7   | 2.10 | 6.3E-04 |
| BF4145  | putative transmembrane CAAX amino<br>terminal protease family                            | 43.2   | 44.7   | 40.6   | 84.8   | 95.0   | 88.2   | 2.08 | 6.2E-04 |
| BF4146  | hypothetical protein (pseudogene)                                                        | 2.1    | 5.6    | 5.8    | 1.0    | 1.2    | 3.0    | 0.38 | 1.6E-01 |
| BF4146A | hypothetical protein                                                                     | 21.5   | 16.9   | 23.6   | 7.1    | 13.0   | 14.3   | 0.54 | 9.7E-02 |
| ribF    | putative riboflavin biosynthesis protein<br>RibF                                         | 407.4  | 414.2  | 413.8  | 259.4  | 294.9  | 335.7  | 0.72 | 2.4E-02 |
| BF4148  | putative haloacid dehalogenase-type<br>hydrolase                                         | 337.9  | 331.8  | 354.0  | 239.9  | 232.4  | 248.5  | 0.70 | 1.3E-03 |
| BF4149  | putative transmembrane calcium-<br>transporting ATPase                                   | 329.2  | 320.5  | 303.3  | 188.4  | 180.1  | 221.2  | 0.62 | 6.3E-03 |
| BF4150  | putative two-component system sensor<br>kinase/response regulator fusion protein         | 40.5   | 30.6   | 34.2   | 31.9   | 34.3   | 33.6   | 0.95 | 6.6E-01 |
| BF4151  | putative transmembrane Na <sup>+</sup> /Pi-<br>cotransporter                             | 256.4  | 254.2  | 262.8  | 339.5  | 355.2  | 318.5  | 1.31 | 4.6E-03 |
| BF4152  | putative phosphoribulose/uridine kinase                                                  | 313.8  | 339.0  | 321.3  | 241.1  | 274.8  | 228.2  | 0.76 | 2.3E-02 |
| BF4153  | putative two-component regulator<br>sensor histidine kinase transcriptional<br>regulator | 251.7  | 255.3  | 239.3  | 341.0  | 341.8  | 299.7  | 1.31 | 1.2E-02 |
| BF4154  | hypothetical protein                                                                     | 22.5   | 26.3   | 20.2   | 60.8   | 57.7   | 57.5   | 2.56 | 1.6E-03 |
| BF4155  | conserved hypothetical exported<br>protein, possible ATP/GTP-binding                     | 29.2   | 37.1   | 24.4   | 59.0   | 46.3   | 75.9   | 1.99 | 4.1E-02 |
| BF4156  | hypothetical protein                                                                     | 56.9   | 61.8   | 43.8   | 79.0   | 69.0   | 88.7   | 1.46 | 6.7E-02 |

|        |                                                                               |       |        |       |        |        |        |      |         |
|--------|-------------------------------------------------------------------------------|-------|--------|-------|--------|--------|--------|------|---------|
| BF4157 | hypothetical protein                                                          | 37.4  | 34.5   | 21.9  | 23.5   | 26.1   | 13.2   | 0.66 | 2.6E-01 |
| BF4158 | putative aminopeptidase                                                       | 382.3 | 423.5  | 302.8 | 476.8  | 323.7  | 718.5  | 1.31 | 4.1E-01 |
| BF4160 | putative RNA polymerase sigma-54 factor                                       | 251.5 | 251.8  | 193.3 | 274.2  | 210.6  | 311.3  | 1.14 | 5.0E-01 |
| BF4161 | putative transmembrane protein                                                | 364.3 | 407.9  | 384.6 | 286.3  | 308.1  | 307.0  | 0.78 | 9.9E-03 |
| BF4162 | glycine cleavage system protein H                                             | 364.0 | 409.4  | 396.3 | 946.4  | 973.7  | 962.8  | 2.47 | 2.2E-04 |
| purE   | putative transmembrane phosphoribosylaminoimidazole carboxylase               | 437.5 | 465.3  | 409.7 | 1048.0 | 1032.3 | 1088.8 | 2.42 | 3.2E-04 |
| BF4164 | 4-hydroxy-3-methylbut-2-en-1-yl diphosphate synthase                          | 211.4 | 212.9  | 199.0 | 346.0  | 301.1  | 358.0  | 1.61 | 4.3E-03 |
| BF4165 | hypothetical protein                                                          | 82.5  | 90.4   | 75.8  | 71.7   | 68.4   | 85.1   | 0.90 | 3.6E-01 |
| BF4166 | possible xylosidase/arabinosidase                                             | 31.2  | 30.1   | 27.6  | 16.2   | 11.4   | 15.2   | 0.48 | 8.6E-03 |
| BF4167 | hypothetical protein                                                          | 5.2   | 3.8    | 3.9   | 1.4    | 0.6    | 2.2    | 0.30 | 5.9E-02 |
| BF4168 | putative outer membrane protein                                               | 0.3   | 0.2    | 0.1   | 0.9    | 0.1    | 1.0    | 2.21 | 4.0E-01 |
| BF4169 | putative TonB-linked outer membrane protein                                   | 0.5   | 0.5    | 0.4   | 0.6    | 0.5    | 0.5    | 1.14 | 3.2E-01 |
| bglX   | periplasmic beta-glucosidase precursor                                        | 6.4   | 6.7    | 5.7   | 9.1    | 5.3    | 14.2   | 1.42 | 3.6E-01 |
| BF4171 | hypothetical protein                                                          | 112.2 | 114.6  | 99.1  | 104.1  | 88.4   | 117.5  | 0.95 | 6.6E-01 |
| BF4172 | putative carboxy-terminal processing protease precursor                       | 407.8 | 398.1  | 376.1 | 291.1  | 277.1  | 292.8  | 0.73 | 2.2E-03 |
| BF4173 | putative PfkB family carbohydrate kinase                                      | 106.2 | 107.5  | 97.3  | 108.6  | 96.6   | 93.7   | 0.96 | 5.7E-01 |
| BFt68  | tRNA-Asn-GTT                                                                  | 0.0   | 0.0    | 0.0   | 0.0    | 0.0    | 0.0    |      |         |
| BFt69  | tRNA-Asn-GTT                                                                  | 850.2 | 1138.3 | 767.1 | 760.2  | 849.0  | 2288.5 | 1.26 | 6.4E-01 |
| BF4174 | hypothetical protein                                                          | 14.8  | 10.7   | 11.6  | 12.8   | 12.5   | 15.0   | 1.09 | 5.3E-01 |
| BF4175 | hypothetical protein                                                          | 9.0   | 8.6    | 6.7   | 7.9    | 11.9   | 8.1    | 1.13 | 5.6E-01 |
| BF4176 | hypothetical protein                                                          | 5.5   | 6.6    | 6.1   | 7.9    | 9.2    | 8.4    | 1.40 | 1.7E-02 |
| BF4177 | putative outer membrane protein                                               | 2.4   | 2.7    | 2.7   | 5.5    | 6.2    | 4.6    | 2.08 | 5.2E-03 |
| BF4178 | putative outer membrane protein                                               | 2.4   | 2.0    | 2.9   | 5.8    | 6.0    | 4.6    | 2.25 | 1.3E-02 |
| BF4179 | putative two-component system sensor kinase/response regulator fusion protein | 3.2   | 3.4    | 3.0   | 3.6    | 3.3    | 3.7    | 1.11 | 1.3E-01 |
| BF4180 | putative pyruvate formate-lyase activating enzyme                             | 1.3   | 1.2    | 1.0   | 2.1    | 2.3    | 3.0    | 2.11 | 1.4E-02 |
| pflD   | putative formate acetyltransferase (pyruvate formate-lyase)                   | 0.7   | 0.7    | 0.7   | 1.9    | 1.8    | 1.6    | 2.51 | 8.2E-04 |
| BF4182 | putative transmembrane sugar transporter                                      | 0.8   | 0.3    | 0.6   | 1.5    | 1.7    | 1.9    | 3.33 | 3.6E-02 |
| BF4183 | putative aldose 1-epimerase precursor                                         | 2.0   | 2.5    | 2.4   | 2.4    | 3.4    | 2.7    | 1.22 | 2.6E-01 |
| BF4184 | hypothetical protein                                                          | 1.1   | 1.0    | 1.3   | 3.1    | 3.4    | 3.1    | 2.83 | 1.7E-03 |
| BF4185 | hypothetical protein                                                          | 286.0 | 292.8  | 283.9 | 291.8  | 305.0  | 328.3  | 1.07 | 1.8E-01 |
| BF4186 | possible amidophosphoribosyl-transferase                                      | 58.6  | 55.0   | 56.6  | 69.5   | 62.2   | 73.0   | 1.20 | 4.3E-02 |
| suhB   | putative inositol-1-monophosphatase                                           | 46.6  | 36.3   | 45.3  | 58.6   | 62.5   | 72.4   | 1.51 | 3.0E-02 |
| BF4188 | hypothetical protein                                                          | 53.4  | 62.8   | 52.7  | 15.3   | 18.4   | 20.2   | 0.32 | 1.8E-03 |
| BF4189 | putative alpha-galactosidase/melibiose                                        | 38.0  | 31.8   | 31.5  | 37.7   | 35.1   | 41.2   | 1.13 | 2.6E-01 |
| BF4190 | hypothetical protein                                                          | 44.8  | 38.6   | 44.0  | 22.0   | 32.6   | 20.9   | 0.58 | 4.1E-02 |
| BF4191 | hypothetical protein                                                          | 115.2 | 94.4   | 104.5 | 41.1   | 59.9   | 63.5   | 0.52 | 2.4E-02 |
| BF4192 | hypothetical protein                                                          | 1.2   | 2.7    | 1.5   | 1.1    | 0.5    | 2.4    | 0.67 | 5.4E-01 |
| BF4193 | hypothetical protein                                                          | 2.6   | 0.3    | 0.3   | 0.6    | 1.7    | 1.1    | 1.59 | 6.5E-01 |

|        |                                                         |        |        |        |        |        |        |      |         |
|--------|---------------------------------------------------------|--------|--------|--------|--------|--------|--------|------|---------|
| BF4194 | putative lipopolysaccharide biosynthesis protein        | 8.2    | 1.5    | 3.4    | 2.7    | 1.6    | 4.1    | 0.75 | 6.9E-01 |
| BF4195 | hypothetical protein                                    | 6.0    | 4.4    | 4.4    | 5.0    | 5.4    | 5.5    | 1.09 | 5.2E-01 |
| BF4196 | hypothetical protein                                    | 7.8    | 8.3    | 8.5    | 9.8    | 10.6   | 8.5    | 1.17 | 1.3E-01 |
| BF4197 | possible regulatory protein                             | 7.5    | 6.1    | 6.3    | 7.9    | 6.2    | 7.3    | 1.08 | 5.6E-01 |
| BF4198 | hypothetical protein                                    | 7.1    | 7.4    | 8.6    | 5.8    | 8.1    | 6.6    | 0.88 | 3.8E-01 |
| BF4199 | hypothetical protein                                    | 14.1   | 6.3    | 11.5   | 18.3   | 21.5   | 15.0   | 1.79 | 1.3E-01 |
| BF4200 | putative glycosyl transferase                           | 30.8   | 35.3   | 36.0   | 13.8   | 20.0   | 13.7   | 0.46 | 1.2E-02 |
| BF4202 | putative glycosyl transferase                           | 3.4    | 4.6    | 4.0    | 5.7    | 5.9    | 4.4    | 1.33 | 1.3E-01 |
| BF4203 | hypothetical protein                                    | 3.5    | 2.7    | 1.9    | 2.1    | 3.7    | 2.6    | 1.03 | 9.2E-01 |
| BF4204 | hypothetical protein                                    | 6.8    | 5.2    | 7.3    | 5.7    | 7.4    | 8.2    | 1.10 | 6.3E-01 |
| BF4205 | hypothetical protein                                    | 12.8   | 10.1   | 15.1   | 13.9   | 11.0   | 10.0   | 0.92 | 6.8E-01 |
| BF4206 | hypothetical protein                                    | 11.2   | 6.8    | 8.1    | 7.8    | 11.5   | 9.2    | 1.10 | 6.9E-01 |
| BF4207 | hypothetical protein                                    | 2.5    | 3.2    | 2.0    | 4.4    | 4.8    | 4.1    | 1.77 | 3.6E-02 |
| BF4208 | hypothetical protein                                    | 2.5    | 3.0    | 3.8    | 3.0    | 3.3    | 3.8    | 1.10 | 6.0E-01 |
| BF4209 | hypothetical protein                                    | 3.5    | 5.9    | 6.1    | 5.6    | 7.9    | 8.1    | 1.42 | 2.5E-01 |
| BF4210 | putative DNA-binding protein                            | 8.8    | 6.3    | 4.3    | 7.9    | 4.5    | 8.0    | 1.06 | 8.7E-01 |
| BF4211 | hypothetical protein                                    | 4.0    | 3.2    | 2.9    | 2.3    | 3.3    | 1.9    | 0.71 | 2.1E-01 |
| BF4212 | hypothetical protein                                    | 4.5    | 5.1    | 5.3    | 7.8    | 12.3   | 6.3    | 1.71 | 9.1E-02 |
| BF4213 | hypothetical protein                                    | 3.8    | 5.5    | 4.8    | 6.3    | 6.4    | 7.7    | 1.44 | 7.2E-02 |
| BF4214 | putative MutT/NUDIX family protein                      | 66.2   | 64.7   | 53.7   | 65.9   | 61.1   | 61.9   | 1.03 | 7.7E-01 |
| BF4215 | putative TPR-repeat protein                             | 174.6  | 176.1  | 163.0  | 181.2  | 166.5  | 160.8  | 0.99 | 8.5E-01 |
| BF4216 | hypothetical protein                                    | 231.3  | 207.7  | 211.2  | 185.4  | 188.6  | 193.6  | 0.87 | 3.8E-02 |
| topA   | putative DNA topoisomerase I                            | 395.7  | 374.7  | 343.3  | 296.1  | 262.1  | 269.4  | 0.74 | 1.5E-02 |
| BF4218 | hypothetical protein                                    | 151.0  | 138.3  | 144.1  | 55.6   | 55.4   | 62.3   | 0.40 | 4.0E-04 |
| argS   | arginyl-tRNA synthetase                                 | 193.7  | 180.8  | 180.7  | 211.7  | 189.8  | 236.7  | 1.15 | 1.7E-01 |
| hup3   | putative histone-like DNA-binding protein HU3           | 896.5  | 1091.1 | 1190.0 | 3032.3 | 4161.4 | 3763.8 | 3.44 | 2.7E-03 |
| BF4221 | putative transmembrane rhomboid family protein          | 453.0  | 473.3  | 424.0  | 277.7  | 289.9  | 284.9  | 0.63 | 1.1E-03 |
| BF4222 | putative transmembrane rhomboid family protein          | 310.2  | 293.2  | 285.6  | 235.1  | 218.1  | 258.6  | 0.80 | 3.1E-02 |
| BF4223 | hypothetical protein                                    | 65.9   | 63.4   | 64.2   | 59.6   | 48.2   | 63.8   | 0.88 | 2.7E-01 |
| BF4224 | hypothetical protein                                    | 1.6    | 3.5    | 3.6    | 3.1    | 3.8    | 2.1    | 1.06 | 8.9E-01 |
| BF4225 | putative protein-export transmembrane SecDF protein     | 1341.5 | 1571.0 | 1422.9 | 1400.4 | 1354.6 | 1334.0 | 0.94 | 3.8E-01 |
| hup4   | putative histone-like DNA-binding protein HU4           | 212.2  | 223.8  | 207.0  | 287.3  | 194.5  | 233.8  | 1.10 | 5.3E-01 |
| BF4227 | hypothetical protein                                    | 88.0   | 125.4  | 124.4  | 60.6   | 59.3   | 70.3   | 0.57 | 2.5E-02 |
| BF4228 | hypothetical protein                                    | 127.7  | 174.6  | 179.9  | 61.8   | 68.2   | 71.6   | 0.42 | 6.1E-03 |
| BF4229 | hypothetical protein                                    | 242.4  | 348.9  | 351.3  | 202.6  | 200.6  | 231.7  | 0.68 | 7.2E-02 |
| BF4230 | hypothetical protein                                    | 731.8  | 888.3  | 976.9  | 817.2  | 792.6  | 696.8  | 0.89 | 3.8E-01 |
| BF4231 | hypothetical protein                                    | 102.0  | 102.4  | 106.0  | 83.4   | 91.9   | 88.5   | 0.85 | 1.5E-02 |
| BF4232 | hypothetical protein                                    | 156.0  | 135.2  | 160.7  | 89.7   | 111.8  | 109.8  | 0.69 | 2.8E-02 |
| BF4233 | hypothetical protein                                    | 3.6    | 1.9    | 3.0    | 0.9    | 0.0    | 0.9    | 0.31 | 1.9E-02 |
| BF4234 | putative AraC-family transcriptional regulatory protein | 4.4    | 2.1    | 3.5    | 3.6    | 3.2    | 2.3    | 0.93 | 8.4E-01 |
| BF4235 | putative bacteriophage integrase                        | 45.2   | 41.7   | 47.2   | 34.5   | 36.8   | 34.9   | 0.79 | 1.3E-02 |
| BF4236 | hypothetical protein                                    | 7.5    | 4.8    | 9.1    | 0.0    | 3.5    | 2.2    | 0.40 | 9.0E-02 |
| BFt70  | tRNA-Arg-CCT                                            | 16.5   | 12.5   | 10.4   | 11.1   | 10.9   | 9.0    | 0.80 | 2.8E-01 |

|        |                                                                 |         |         |         |        |        |        |      |         |
|--------|-----------------------------------------------------------------|---------|---------|---------|--------|--------|--------|------|---------|
| porA   | putative 2-oxoglutarate ferredoxin oxidoreductase subunit       | 369.5   | 384.0   | 341.9   | 381.1  | 327.6  | 337.8  | 0.95 | 5.3E-01 |
| porB   | ferredoxin oxidoreductase beta subunit                          | 299.0   | 295.2   | 269.1   | 362.9  | 331.4  | 300.2  | 1.15 | 1.4E-01 |
| BF4241 | putative transmembrane protein                                  | 24.1    | 22.0    | 25.6    | 11.5   | 13.6   | 8.8    | 0.47 | 1.3E-02 |
| ugpQ   | putative glycerophosphoryl diester phosphodiesterase            | 258.9   | 247.0   | 232.3   | 156.5  | 142.4  | 189.5  | 0.66 | 2.1E-02 |
| BF4243 | uracil phosphoribosyltransferase                                | 229.1   | 257.1   | 255.2   | 323.8  | 301.4  | 272.0  | 1.21 | 6.9E-02 |
| pckA   | phosphoenolpyruvate carboxykinase                               | 10609.8 | 11246.7 | 11885.5 | 8757.9 | 8903.4 | 8356.5 | 0.77 | 7.3E-03 |
| BF4245 | hypothetical protein                                            | 55.1    | 43.7    | 59.6    | 28.3   | 37.8   | 31.3   | 0.62 | 3.6E-02 |
| BF4246 | putative outer membrane protein                                 | 13.0    | 14.0    | 15.0    | 64.7   | 69.2   | 56.6   | 4.53 | 3.6E-04 |
| BF4247 | hypothetical protein                                            | 14.6    | 13.4    | 13.8    | 58.3   | 66.6   | 54.2   | 4.27 | 3.1E-04 |
| BF4248 | putative outer membrane protein                                 | 18.8    | 18.9    | 19.4    | 78.8   | 71.9   | 70.3   | 3.87 | 6.7E-05 |
| BF4249 | putative outer membrane protein                                 | 9.6     | 8.8     | 10.6    | 55.1   | 49.7   | 51.2   | 5.40 | 1.7E-04 |
| BF4250 | hypothetical protein                                            | 13.6    | 16.8    | 23.1    | 85.0   | 74.1   | 74.4   | 4.46 | 3.1E-03 |
| BF4251 | hypothetical protein                                            | 8.2     | 9.4     | 5.8     | 23.2   | 21.1   | 25.5   | 3.05 | 6.4E-03 |
| BF4252 | putative transmembrane protein                                  | 9.2     | 9.3     | 9.0     | 25.5   | 27.2   | 28.4   | 2.94 | 1.1E-04 |
| BF4253 | hypothetical protein                                            | 2.9     | 6.7     | 7.0     | 16.9   | 12.7   | 12.7   | 2.72 | 5.4E-02 |
| BF4254 | hypothetical protein                                            | 4.7     | 6.0     | 4.7     | 21.6   | 15.3   | 23.4   | 3.87 | 3.7E-03 |
| BF4255 | hypothetical protein                                            | 59.5    | 60.2    | 51.3    | 180.1  | 157.8  | 172.5  | 2.99 | 6.0E-04 |
| BF4256 | putative outer membrane protein                                 | 65.4    | 57.6    | 61.2    | 282.2  | 290.1  | 285.3  | 4.66 | 5.0E-05 |
| BF4257 | hypothetical protein                                            | 106.2   | 106.8   | 104.9   | 437.0  | 429.6  | 392.1  | 3.96 | 5.2E-05 |
| typA   | putative GTP-binding elongation factor family protein TypA/BipA | 1025.5  | 1102.7  | 1075.6  | 666.1  | 641.8  | 620.5  | 0.60 | 5.9E-04 |
| rpsO   | putative 30S ribosomal protein S15                              | 2757.9  | 3212.2  | 3407.5  | 2812.7 | 3176.3 | 3596.8 | 1.02 | 8.7E-01 |
| BF4260 | putative transcriptional regulator                              | 147.0   | 142.4   | 145.7   | 464.5  | 501.5  | 402.0  | 3.13 | 5.7E-04 |
| BF4261 | acyl-CoA synthase                                               | 96.0    | 94.6    | 95.1    | 370.5  | 367.8  | 339.6  | 3.77 | 3.2E-05 |
| BF4262 | putative two-component sensor histidine kinase with PAS domain  | 22.9    | 19.0    | 20.6    | 28.7   | 26.0   | 24.9   | 1.28 | 4.4E-02 |
| sahH   | S-adenosyl-L-homocysteine hydrolase                             | 485.6   | 536.9   | 470.4   | 355.1  | 304.2  | 410.5  | 0.71 | 4.4E-02 |
| BF4264 | hypothetical protein                                            | 170.9   | 184.1   | 177.0   | 141.1  | 142.0  | 130.2  | 0.78 | 6.4E-03 |
| BF4265 | hypothetical protein                                            | 39.2    | 36.5    | 37.8    | 21.9   | 25.9   | 32.9   | 0.70 | 7.1E-02 |
| BF4266 | putative arylsulfatase                                          | 2.2     | 2.9     | 2.8     | 1.2    | 2.3    | 2.2    | 0.69 | 2.4E-01 |
| BF4267 | hypothetical protein                                            | 3.3     | 2.1     | 2.3     | 0.9    | 2.2    | 2.1    | 0.62 | 3.0E-01 |
| BF4270 | putative anti-sigma factor                                      | 12.8    | 11.0    | 12.9    | 6.9    | 5.1    | 6.8    | 0.51 | 1.0E-02 |
| BF4271 | putative ECF-type RNA polymerase                                | 149.3   | 154.4   | 143.6   | 95.7   | 103.3  | 79.7   | 0.62 | 1.1E-02 |
| BF4273 | putative lipoprotein releasing system transmembrane protein     | 808.3   | 759.8   | 818.0   | 493.7  | 561.4  | 513.4  | 0.66 | 3.0E-03 |
| BF4274 | putative ribosome-binding factor A                              | 694.7   | 664.0   | 765.5   | 425.4  | 539.3  | 463.1  | 0.67 | 1.8E-02 |
| BF4275 | putative transmembrane protein                                  | 72.3    | 84.1    | 79.7    | 32.7   | 35.2   | 43.5   | 0.47 | 5.0E-03 |
| BF4276 | putative O-methyltransferase                                    | 329.2   | 326.6   | 319.6   | 181.9  | 178.1  | 180.9  | 0.55 | 2.0E-05 |
| pyk    | pyruvate kinase                                                 | 711.6   | 648.5   | 702.4   | 437.4  | 474.3  | 428.8  | 0.65 | 2.4E-03 |
| aroQ   | 3-dehydroquinate dehydratase                                    | 428.1   | 404.0   | 422.4   | 227.4  | 247.6  | 194.7  | 0.53 | 3.8E-03 |
| xerD   | putative tyrosine recombinase                                   | 54.9    | 55.3    | 53.6    | 52.6   | 52.7   | 52.7   | 0.96 | 3.9E-02 |
| BF4280 | hypothetical protein                                            | 5360.8  | 5887.0  | 5899.4  | 6700.8 | 6857.9 | 6266.6 | 1.16 | 4.6E-02 |
| BF4281 | possible thiol-disulfide oxidoreductase                         | 132.1   | 128.5   | 129.7   | 140.8  | 161.6  | 131.8  | 1.11 | 2.2E-01 |
| BF4282 | hypothetical protein                                            | 65.2    | 66.3    | 62.9    | 85.3   | 88.5   | 85.8   | 1.34 | 8.7E-04 |
| BF4283 | hypothetical protein                                            | 17.0    | 18.1    | 18.9    | 27.5   | 28.4   | 25.3   | 1.51 | 3.7E-03 |
| BF4284 | hypothetical protein                                            | 35.8    | 36.0    | 37.8    | 15.2   | 18.1   | 15.8   | 0.45 | 8.8E-04 |
| BF4285 | hypothetical protein                                            | 15.1    | 13.4    | 14.2    | 14.8   | 16.8   | 14.4   | 1.08 | 3.5E-01 |



|        |                                                                               |        |        |        |        |        |        |      |         |
|--------|-------------------------------------------------------------------------------|--------|--------|--------|--------|--------|--------|------|---------|
| BF4286 | putative two-component system sensor kinase/response regulator fusion protein | 14.0   | 13.0   | 15.4   | 14.7   | 16.0   | 15.0   | 1.08 | 3.1E-01 |
| BF4287 | putative radical SAM-family protein                                           | 44.0   | 38.4   | 42.8   | 50.0   | 56.8   | 58.0   | 1.32 | 2.5E-02 |
| BF4288 | hypothetical protein                                                          | 74.3   | 60.3   | 54.0   | 89.9   | 95.3   | 121.5  | 1.63 | 4.0E-02 |
| BF4289 | putative CoA-binding protein                                                  | 99.9   | 99.0   | 91.7   | 156.0  | 165.2  | 166.0  | 1.68 | 7.8E-04 |
| BF4290 | hypothetical protein                                                          | 21.5   | 23.9   | 22.0   | 20.5   | 21.4   | 15.8   | 0.85 | 2.4E-01 |
| BF4294 | putative transmembrane anchored hypothetical protein                          | 8.7    | 8.2    | 10.0   | 24.5   | 29.5   | 23.0   | 2.86 | 1.9E-03 |
| BF4295 | hypothetical protein                                                          | 2.0    | 5.8    | 3.8    | 16.5   | 15.0   | 11.5   | 3.99 | 2.9E-02 |
| BF4296 | hypothetical protein                                                          | 2.6    | 2.8    | 1.4    | 11.7   | 12.2   | 7.9    | 4.80 | 9.5E-03 |
| metG   | methionyl-tRNA synthetase                                                     | 308.3  | 332.2  | 308.1  | 353.2  | 315.8  | 300.5  | 1.02 | 7.8E-01 |
| BF4298 | putative O-antigen repeat unit transporter                                    | 76.5   | 88.9   | 82.4   | 87.2   | 90.3   | 81.9   | 1.05 | 4.9E-01 |
| BF4299 | putative glycosyltransferase                                                  | 41.1   | 40.8   | 34.5   | 49.0   | 48.0   | 43.9   | 1.21 | 7.3E-02 |
| BF4300 | putative exopolysaccharide biosynthesis protein                               | 44.9   | 45.1   | 42.3   | 50.0   | 47.3   | 44.4   | 1.07 | 2.3E-01 |
| BF4301 | putative glycosyltransferase                                                  | 50.1   | 46.0   | 48.3   | 53.8   | 51.9   | 49.8   | 1.08 | 1.4E-01 |
| BF4302 | putative transmembrane protein                                                | 85.2   | 92.1   | 83.1   | 90.3   | 92.7   | 86.7   | 1.04 | 4.5E-01 |
| BF4303 | putative UDP-N-acetylglucosamine 2-epimerase                                  | 120.3  | 116.2  | 111.8  | 112.7  | 106.6  | 123.9  | 0.98 | 8.0E-01 |
| BF4304 | putative UDP-N-acetyl-D-mannosamine dehydrogenase                             | 198.2  | 188.6  | 177.2  | 171.0  | 164.7  | 172.9  | 0.90 | 7.5E-02 |
| BF4305 | putative glycosyltransferase                                                  | 140.5  | 139.2  | 142.0  | 137.9  | 137.8  | 147.9  | 1.00 | 9.0E-01 |
| BF4306 | putative glycosyltransferase                                                  | 121.0  | 109.3  | 107.6  | 119.8  | 125.0  | 125.1  | 1.10 | 1.2E-01 |
| cobB   | NAD-dependent deacetylase                                                     | 98.8   | 94.9   | 79.1   | 92.8   | 77.2   | 111.6  | 1.03 | 8.9E-01 |
| fkIB   | putative FkbP-type 22 kDa peptidyl-prolyl cis-trans isomerase                 | 811.4  | 754.3  | 819.1  | 723.5  | 645.3  | 716.5  | 0.87 | 6.8E-02 |
| BF4309 | putative isomerase                                                            | 1970.0 | 1876.4 | 2046.7 | 1586.8 | 1483.0 | 1433.4 | 0.76 | 7.2E-03 |
| BF4310 | putative AsnC-family transcriptional regulatory protein                       | 1513.3 | 1470.8 | 1541.5 | 1664.8 | 1667.3 | 1429.9 | 1.05 | 4.8E-01 |
| BF4311 | putative transmembrane protein                                                | 1421.2 | 1387.8 | 1508.3 | 1670.2 | 1783.6 | 1565.3 | 1.16 | 5.3E-02 |
| BFi71  | tRNA-Met-CAT                                                                  | 271.8  | 309.4  | 333.5  | 336.7  | 416.9  | 521.6  | 1.38 | 1.3E-01 |
| BF4312 | putative two-component response regulator                                     | 27.1   | 27.9   | 27.4   | 28.5   | 33.3   | 32.4   | 1.14 | 8.5E-02 |
| BF4313 | putative two-component system sensor, no kinase domain                        | 29.6   | 29.1   | 34.3   | 29.8   | 27.5   | 23.4   | 0.87 | 2.4E-01 |
| BF4314 | putative outer membrane component of efflux transporter                       | 4.6    | 3.6    | 3.5    | 2.6    | 3.0    | 2.7    | 0.72 | 5.3E-02 |
| BF4315 | putative transmembrane AcrB/D/F-family transporter                            | 1.8    | 1.9    | 2.2    | 1.0    | 0.9    | 1.2    | 0.53 | 6.5E-03 |
| BF4316 | putative efflux transporter component                                         | 4.6    | 2.5    | 2.2    | 0.6    | 1.6    | 0.8    | 0.32 | 5.3E-02 |
| 5S     |                                                                               | 0.4    | 8.3    | 41.3   | 1.9    | 5.2    | 27.2   | 1.27 | 9.1E-01 |
| 23S    |                                                                               | 13.7   | 7.5    | 12.2   | 16.3   | 9.1    | 22.1   | 1.38 | 4.5E-01 |
| BFi72  | tRNA-Ala-TGC                                                                  | 87.0   | 97.6   | 97.6   | 47.1   | 45.1   | 95.3   | 0.62 | 1.8E-01 |
| BFi73  | tRNA-Ile-GAT                                                                  | 158.9  | 177.9  | 180.8  | 63.0   | 65.0   | 113.6  | 0.45 | 3.1E-02 |
| 16S    |                                                                               | 672.5  | 32.3   | 99.0   | 90.9   | 32.3   | 230.2  | 0.68 | 7.8E-01 |
| BF4317 | hypothetical protein                                                          | 0.0    | 0.0    | 0.0    | 96.4   | 92.4   | 155.5  |      |         |
| BF4318 | hypothetical protein                                                          | 0.0    | 1.5    | 0.8    | 0.0    | 0.0    | 0.0    |      |         |
| BF4319 | putative D-Ala-D-Ala dipeptidase protein                                      | 16.9   | 18.8   | 21.0   | 21.2   | 21.5   | 19.0   | 1.09 | 3.8E-01 |

|        |                                                                                                            |        |        |        |        |        |        |       |         |
|--------|------------------------------------------------------------------------------------------------------------|--------|--------|--------|--------|--------|--------|-------|---------|
| BF4320 | hypothetical protein                                                                                       | 20.9   | 18.5   | 18.3   | 42.5   | 43.1   | 39.2   | 2.17  | 8.4E-04 |
| BF4321 | hypothetical protein                                                                                       | 14.7   | 14.3   | 17.6   | 153.7  | 157.2  | 150.6  | 9.95  | 9.2E-05 |
| BF4322 | putative outer membrane protein                                                                            | 12.2   | 14.0   | 12.8   | 142.1  | 137.9  | 113.1  | 10.05 | 1.6E-04 |
| BF4323 | putative TonB-dependent outer membrane receptor protein                                                    | 16.5   | 15.2   | 15.3   | 123.6  | 129.7  | 113.6  | 7.80  | 3.8E-05 |
| BF4324 | hypothetical protein                                                                                       | 19.5   | 19.3   | 18.7   | 63.8   | 62.0   | 67.9   | 3.37  | 5.2E-05 |
| BF4325 | putative transmembrane sugar transporter                                                                   | 34.5   | 42.3   | 35.8   | 166.4  | 143.3  | 198.2  | 4.49  | 1.2E-03 |
| BF4326 | putative two-component system sensor kinase/response regulator fusion protein                              | 14.7   | 18.9   | 16.4   | 27.3   | 25.7   | 25.7   | 1.58  | 1.0E-02 |
| BF4327 | putative glycosylhydrolase                                                                                 | 80.6   | 83.0   | 77.4   | 125.7  | 124.8  | 136.9  | 1.61  | 1.2E-03 |
| BF4328 | putative TonB-dependent outer membrane receptor protein                                                    | 1.2    | 1.1    | 0.8    | 0.6    | 0.3    | 0.6    | 0.46  | 7.2E-02 |
| BF4329 | putative acid phosphatase                                                                                  | 7.8    | 7.6    | 5.2    | 3.9    | 5.0    | 6.2    | 0.73  | 2.3E-01 |
| BF4330 | putative transmembrane ion channel                                                                         | 56.1   | 55.6   | 59.8   | 49.0   | 39.8   | 47.3   | 0.79  | 4.8E-02 |
| BF4331 | putative transmembrane K <sup>+</sup> dependent Na <sup>+</sup> /Ca <sup>+</sup> exchanger-related protein | 39.1   | 38.0   | 42.0   | 56.6   | 49.1   | 52.4   | 1.33  | 1.3E-02 |
| BF4332 | hypothetical protein                                                                                       | 142.3  | 126.4  | 130.0  | 162.8  | 152.5  | 147.7  | 1.16  | 5.5E-02 |
| parE   | DNA topoisomerase IV subunit B                                                                             | 212.4  | 208.8  | 185.8  | 226.3  | 210.5  | 221.3  | 1.09  | 2.1E-01 |
| coaD   | phosphopantetheine adenylyltransferase                                                                     | 218.5  | 233.3  | 207.6  | 172.0  | 193.9  | 176.4  | 0.82  | 3.4E-02 |
| BF4335 | putative carboxy-terminal processing protease precursor                                                    | 184.4  | 180.4  | 176.6  | 175.3  | 160.4  | 163.4  | 0.92  | 8.4E-02 |
| BF4336 | putative transmembrane PAP2-family protein                                                                 | 107.7  | 92.6   | 104.9  | 96.2   | 95.3   | 89.8   | 0.92  | 2.5E-01 |
| BF4337 | putative AraC-family transcriptional regulator                                                             | 251.2  | 230.8  | 210.9  | 343.3  | 351.0  | 298.7  | 1.43  | 1.7E-02 |
| BF4339 | fumarate reductase transmembrane cytochrome b subunit                                                      | 954.3  | 954.1  | 909.5  | 808.2  | 778.2  | 736.5  | 0.82  | 9.8E-03 |
| BF4340 | succinate dehydrogenase                                                                                    | 1089.5 | 1224.1 | 1096.2 | 1061.7 | 997.7  | 1034.9 | 0.91  | 1.3E-01 |
| BF4341 | succinate dehydrogenase                                                                                    | 1440.6 | 1657.2 | 1476.5 | 1109.4 | 1135.2 | 1156.3 | 0.74  | 8.2E-03 |
| BF4342 | putative iron-regulated transmembrane protein                                                              | 492.7  | 493.9  | 480.0  | 310.4  | 304.5  | 311.5  | 0.63  | 5.4E-05 |
| BF4343 | hypothetical protein                                                                                       | 571.8  | 556.5  | 533.7  | 420.2  | 386.3  | 397.6  | 0.72  | 2.5E-03 |
| BF4344 | putative TonB-dependent outer membrane receptor protein                                                    | 381.9  | 351.5  | 347.2  | 272.3  | 247.0  | 276.7  | 0.74  | 8.1E-03 |
| BF4345 | putative AraC-family transcriptional regulator                                                             | 123.1  | 103.6  | 102.0  | 81.6   | 87.4   | 84.8   | 0.78  | 3.2E-02 |
| BF4346 | hypothetical protein                                                                                       | 4.5    | 4.3    | 9.0    | 5.0    | 6.1    | 7.4    | 1.08  | 8.2E-01 |
| BF4347 | hypothetical protein                                                                                       | 2.0    | 1.9    | 0.2    | 0.2    | 0.8    | 0.7    | 0.51  | 5.7E-01 |
| BF4348 | putative transmembrane protein                                                                             | 8.8    | 8.8    | 7.8    | 5.4    | 5.0    | 9.6    | 0.75  | 3.2E-01 |
| BF4349 | putative DNA processing Smf-like protein                                                                   | 219.1  | 234.4  | 207.8  | 173.3  | 162.0  | 190.7  | 0.79  | 3.4E-02 |
| BF4350 | putative thioesterase protein                                                                              | 274.5  | 298.0  | 271.5  | 237.8  | 229.0  | 275.0  | 0.88  | 1.5E-01 |
| BF4351 | putative peptidase                                                                                         | 220.7  | 209.4  | 190.8  | 160.0  | 159.9  | 186.1  | 0.81  | 6.2E-02 |
| BF4352 | hypothetical protein                                                                                       | 202.6  | 196.3  | 206.6  | 140.6  | 133.5  | 129.8  | 0.67  | 9.0E-04 |
| BF4353 | putative TIM-barrel protein, possible dihydrouridine synthase                                              | 64.2   | 50.6   | 47.6   | 58.8   | 44.4   | 64.1   | 1.03  | 9.0E-01 |
| BF4354 | putative transmembrane protein                                                                             | 126.0  | 131.3  | 119.1  | 130.5  | 124.1  | 152.1  | 1.08  | 4.0E-01 |
| BF4355 | putative UDP-glucose 4-epimerase                                                                           | 90.3   | 91.2   | 91.0   | 108.7  | 106.6  | 116.2  | 1.22  | 5.9E-03 |

|             |                                                         |       |       |       |       |       |       |      |         |
|-------------|---------------------------------------------------------|-------|-------|-------|-------|-------|-------|------|---------|
| BF4356      | putative transmembrane cation efflux protein            | 161.2 | 151.2 | 143.8 | 85.8  | 85.8  | 128.5 | 0.65 | 6.0E-02 |
| BF4357      | putative exoribonuclease                                | 259.3 | 273.3 | 230.2 | 231.3 | 222.0 | 230.0 | 0.90 | 1.6E-01 |
| BF4358      | hypothetical protein                                    | 39.2  | 43.1  | 29.3  | 22.2  | 20.5  | 28.5  | 0.64 | 7.3E-02 |
| BF4359      | putative RNA polymerase ECF-type sigma factor           | 11.3  | 13.5  | 8.4   | 6.2   | 9.2   | 9.4   | 0.75 | 2.8E-01 |
| BF4360      | putative transmembrane protein                          | 18.0  | 18.5  | 16.9  | 12.4  | 10.1  | 10.8  | 0.62 | 6.2E-03 |
| BF4361      | putative 5-nitroimidazole antibiotic resistance protein | 126.9 | 128.3 | 136.1 | 132.7 | 136.6 | 150.3 | 1.07 | 2.5E-01 |
| cysK        | putative cysteine synthase                              | 109.4 | 120.0 | 93.5  | 104.6 | 75.0  | 141.1 | 0.97 | 9.0E-01 |
| BF4363      | putative lipase/esterase                                | 43.8  | 48.9  | 47.1  | 68.1  | 65.1  | 73.1  | 1.47 | 4.3E-03 |
| BF4364      | putative metalloprotease                                | 21.3  | 23.2  | 20.0  | 61.3  | 68.1  | 60.0  | 2.94 | 4.7E-04 |
| BF4365      | putative ATP/GTP-binding protein                        | 224.2 | 204.7 | 216.8 | 268.3 | 218.2 | 235.2 | 1.11 | 2.4E-01 |
| BF4366      | putative 2-dehydropantoate 2-reductase                  | 172.3 | 156.0 | 144.2 | 144.8 | 134.0 | 149.4 | 0.91 | 2.5E-01 |
| BF4367      | prolipoprotein diacylglycerol transferase               | 164.4 | 171.0 | 176.4 | 168.0 | 184.2 | 163.6 | 1.01 | 9.0E-01 |
| BF4368      | possible chloramphenicol acetyltransferase              | 264.1 | 240.9 | 250.9 | 235.0 | 233.2 | 225.4 | 0.92 | 7.4E-02 |
| mutS        | DNA mismatch repair protein                             | 241.6 | 230.8 | 257.9 | 228.8 | 235.3 | 217.8 | 0.93 | 2.2E-01 |
| BF4370      | hypothetical protein                                    | 47.6  | 50.1  | 48.0  | 31.9  | 39.0  | 38.8  | 0.75 | 2.8E-02 |
| BF4371      | putative ATP/GTP-binding protein                        | 53.4  | 55.8  | 55.9  | 40.7  | 48.0  | 47.9  | 0.83 | 5.0E-02 |
| leuS        | leucyl-tRNA synthetase                                  | 168.1 | 177.4 | 168.2 | 227.6 | 216.3 | 203.0 | 1.26 | 1.0E-02 |
| BF4373      | putative transmembrane protein                          | 322.3 | 317.8 | 334.4 | 315.1 | 335.9 | 267.6 | 0.94 | 4.8E-01 |
| BF4374      | putative Ham1-like protein                              | 198.8 | 211.4 | 191.3 | 231.8 | 231.2 | 232.6 | 1.16 | 1.8E-02 |
| nadA        | quinolinate synthetase                                  | 177.5 | 158.6 | 171.8 | 201.9 | 189.1 | 219.7 | 1.20 | 5.2E-02 |
| finB        | putative resolvase/DNA invertase                        | 56.7  | 45.2  | 58.2  | 50.7  | 60.5  | 39.9  | 0.94 | 7.3E-01 |
| pBF9343.02  | hypothetical protein                                    | 31.8  | 28.6  | 32.5  | 14.1  | 16.2  | 13.7  | 0.47 | 1.7E-03 |
| pBF9343.03  | putative DNA-binding protein                            | 260.5 | 276.3 | 276.8 | 149.3 | 192.1 | 133.7 | 0.58 | 1.7E-02 |
| pBF9343.04  | hypothetical protein                                    | 216.7 | 204.0 | 245.8 | 193.2 | 201.5 | 157.7 | 0.83 | 1.6E-01 |
| pBF9343.05  | hypothetical protein                                    | 268.1 | 235.3 | 274.0 | 260.0 | 306.7 | 218.2 | 1.00 | 9.9E-01 |
| pBF9343.06  | hypothetical protein                                    | 180.5 | 202.3 | 213.8 | 187.1 | 209.0 | 150.0 | 0.91 | 5.0E-01 |
| pBF9343.07  | hypothetical protein                                    | 190.7 | 165.2 | 229.5 | 208.9 | 212.2 | 149.6 | 0.97 | 8.9E-01 |
| pBF9343.08  | hypothetical protein                                    | 124.8 | 124.3 | 168.0 | 127.3 | 169.3 | 111.3 | 0.97 | 9.0E-01 |
| pBF9343.09  | hypothetical protein                                    | 121.2 | 112.5 | 126.8 | 117.6 | 126.2 | 98.1  | 0.94 | 6.0E-01 |
| pBF9343.10  | hypothetical protein                                    | 111.8 | 104.0 | 140.5 | 112.3 | 135.2 | 76.3  | 0.89 | 6.5E-01 |
| pBF9343.11  | putative integral membrane protein                      | 145.4 | 127.5 | 130.8 | 132.5 | 114.4 | 90.5  | 0.83 | 2.4E-01 |
| pBF9343.12  | putative replication protein                            | 187.3 | 164.0 | 201.2 | 148.9 | 175.5 | 132.9 | 0.83 | 1.8E-01 |
| pBF9343.13  | putative mobilization protein                           | 101.3 | 86.7  | 100.1 | 111.0 | 146.5 | 106.2 | 1.25 | 1.7E-01 |
| pBF9343.14  | putative mobilization protein                           | 107.8 | 97.9  | 116.1 | 148.9 | 164.7 | 119.9 | 1.34 | 8.3E-02 |
| pBF9343.15  | putative ParA-related protein                           | 155.0 | 131.7 | 179.4 | 230.8 | 233.8 | 193.7 | 1.42 | 5.6E-02 |
| pBF9343.16  | hypothetical protein                                    | 731.4 | 708.5 | 805.8 | 799.7 | 865.5 | 669.7 | 1.04 | 7.5E-01 |
| pBF9343.17c | putative regulatory protein                             | 151.8 | 161.0 | 191.8 | 204.0 | 227.0 | 181.1 | 1.21 | 1.6E-01 |
| pBF9343.18c | putative plasmid transfer protein                       | 93.7  | 96.2  | 105.4 | 118.2 | 122.6 | 93.8  | 1.13 | 3.3E-01 |
| pBF9343.20c | hypothetical protein                                    | 495.5 | 516.0 | 539.0 | 585.6 | 570.4 | 444.1 | 1.02 | 8.4E-01 |
| pBF9343.21c | hypothetical protein                                    | 44.0  | 28.2  | 44.8  | 68.0  | 74.1  | 65.7  | 1.81 | 3.6E-02 |
| pBF9343.22c | putative HU-like DNA binding protein                    | 22.6  | 26.8  | 32.0  | 64.9  | 78.6  | 52.1  | 2.39 | 1.3E-02 |
| pBF9343.23c | hypothetical protein                                    | 28.9  | 20.7  | 28.0  | 41.1  | 57.1  | 36.3  | 1.72 | 6.0E-02 |
| pBF9343.24c | putative topoisomerase-related protein                  | 22.1  | 24.9  | 28.8  | 47.6  | 45.9  | 31.6  | 1.63 | 5.6E-02 |
| pBF9343.25c | hypothetical protein                                    | 17.5  | 12.8  | 20.4  | 28.5  | 28.1  | 18.2  | 1.47 | 1.8E-01 |
| pBF9343.26c | putative integral membrane protein                      | 14.7  | 19.0  | 19.7  | 27.2  | 24.3  | 19.5  | 1.33 | 1.5E-01 |

|             |                                    |       |       |       |       |       |       |      |         |
|-------------|------------------------------------|-------|-------|-------|-------|-------|-------|------|---------|
| pBF9343.27c | hypothetical protein               | 19.9  | 16.4  | 20.1  | 36.8  | 37.2  | 27.8  | 1.79 | 1.7E-02 |
| pBF9343.28c | putative integral membrane protein | 18.6  | 17.2  | 18.8  | 54.1  | 56.3  | 47.7  | 2.89 | 4.8E-04 |
| pBF9343.29c | hypothetical protein               | 14.2  | 10.4  | 16.2  | 38.8  | 42.0  | 29.2  | 2.70 | 1.2E-02 |
| pBF9343.30  | putative secreted peptidase        | 19.3  | 14.9  | 19.8  | 28.4  | 35.0  | 18.8  | 1.48 | 1.8E-01 |
| pBF9343.31c | hypothetical protein               | 81.0  | 80.5  | 84.0  | 122.5 | 115.7 | 117.7 | 1.45 | 5.9E-04 |
| pBF9343.32c | hypothetical protein               | 156.2 | 146.7 | 162.3 | 286.4 | 270.8 | 235.4 | 1.70 | 4.6E-03 |
| pBF9343.33c | hypothetical protein               | 170.2 | 145.5 | 172.4 | 233.1 | 257.5 | 207.4 | 1.43 | 2.7E-02 |
| pBF9343.34c | hypothetical protein               | 221.5 | 204.8 | 232.7 | 249.7 | 288.7 | 202.4 | 1.11 | 4.5E-01 |
| pBF9343.35c | putative outer membrane protein    | 55.8  | 45.0  | 61.1  | 47.9  | 51.9  | 41.4  | 0.88 | 3.7E-01 |
| pBF9343.36c | hypothetical protein               | 33.2  | 36.7  | 38.9  | 36.7  | 37.5  | 30.5  | 0.96 | 7.1E-01 |
| pBF9343.37c | hypothetical protein               | 32.6  | 34.6  | 40.9  | 33.5  | 38.9  | 24.9  | 0.89 | 5.4E-01 |
| pBF9343.38c | putative plasmid transfer protein  | 42.4  | 45.1  | 50.0  | 39.2  | 42.1  | 29.6  | 0.80 | 1.8E-01 |
| pBF9343.39c | putative plasmid transfer protein  | 35.1  | 35.2  | 33.4  | 38.9  | 34.0  | 27.6  | 0.96 | 7.6E-01 |
| pBF9343.40c | putative integral membrane protein | 18.4  | 18.7  | 19.8  | 23.2  | 24.6  | 18.4  | 1.16 | 2.5E-01 |
| pBF9343.41c | putative plasmid transfer protein  | 21.8  | 20.1  | 21.5  | 22.8  | 32.6  | 18.4  | 1.13 | 5.7E-01 |
| pBF9343.42c | putative plasmid transfer protein  | 22.6  | 23.1  | 25.6  | 25.8  | 30.4  | 23.7  | 1.11 | 3.3E-01 |
| pBF9343.43c | hypothetical protein               | 14.8  | 16.6  | 18.9  | 24.2  | 19.9  | 17.5  | 1.22 | 2.2E-01 |
| pBF9343.44c | putative plasmid transfer protein  | 24.0  | 16.8  | 20.4  | 22.8  | 25.8  | 18.0  | 1.09 | 6.6E-01 |
| bctA        | plasmid transfer protein           | 23.0  | 24.9  | 25.0  | 33.8  | 31.2  | 25.9  | 1.24 | 1.0E-01 |
| pBF9343.46c | putative plasmid transfer protein  | 27.1  | 20.6  | 21.4  | 39.6  | 53.1  | 32.7  | 1.79 | 4.4E-02 |
| pBF9343.47c | putative plasmid transfer protein  | 169.7 | 150.2 | 159.8 | 236.3 | 228.9 | 209.0 | 1.41 | 7.8E-03 |
| pBF9343.48c | putative integral membrane protein | 33.5  | 33.5  | 31.2  | 53.8  | 43.0  | 39.1  | 1.37 | 5.6E-02 |
