# Supplementary figures and images for: Symbiotic Human Gut Bacteria with Variable Metabolic Priorities for Host Mucosal Glycans
Source: PubMed Central journal article supplement — mBio. 2015 Nov 10;6(6):e01282-15. doi: 10.1128/mBio.01282-15 (PMC4659458; doi:10.1128/mbio.01282-15), 2015-11-10

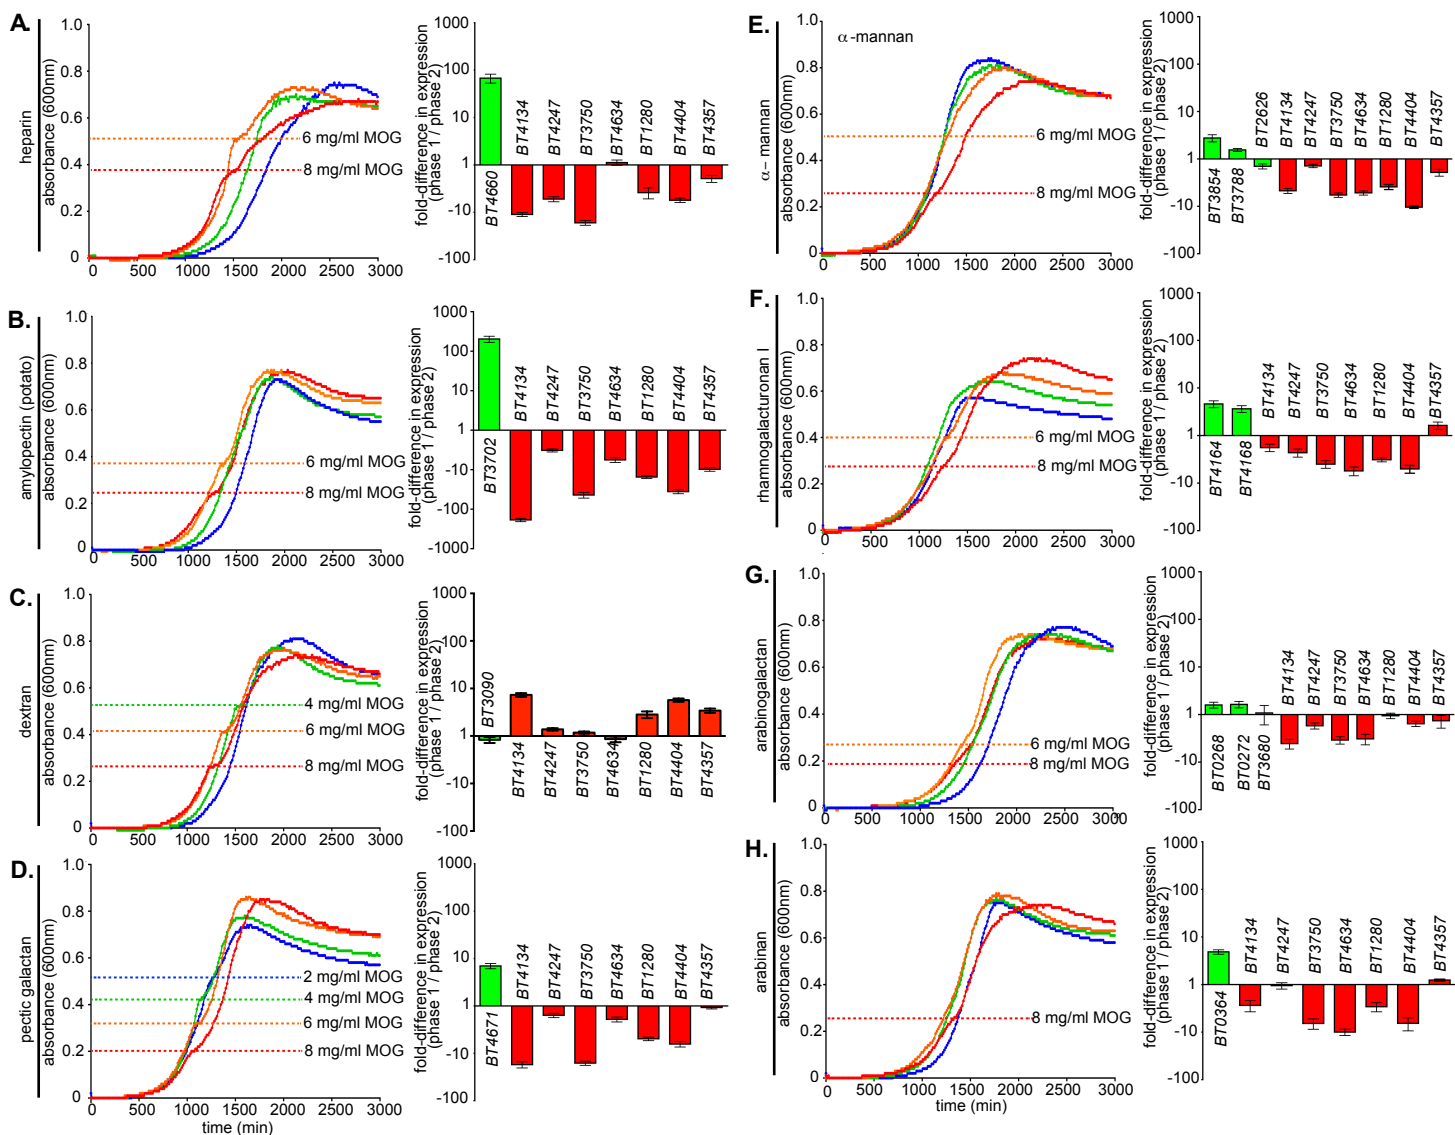

I.

BT4137-32

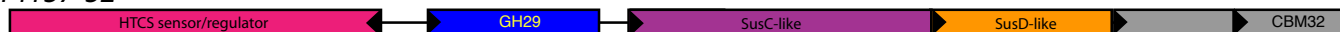

BT4252-40

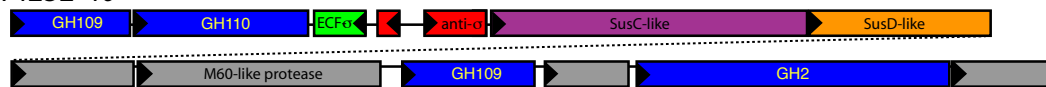

BT3748-54

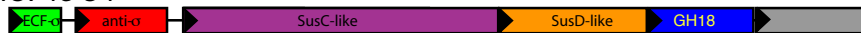

BT4636-31

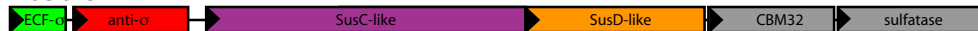

BT1278-85

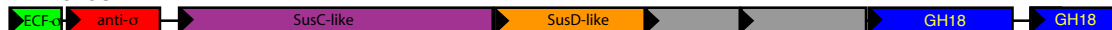

BT4402-07

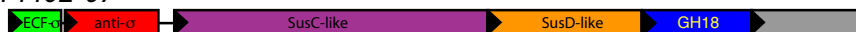

BT4355-59

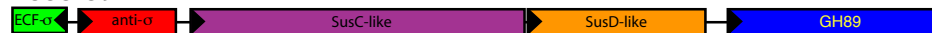

Supplement: mbo006152544sf1.pdf [file mbo006152544sf1.pdf]

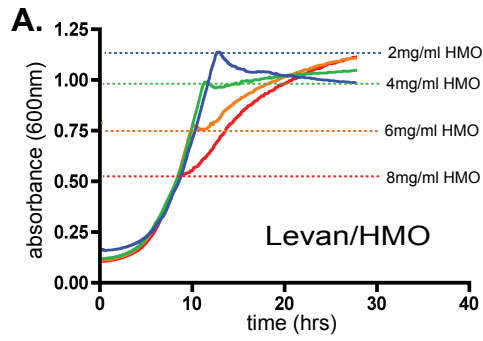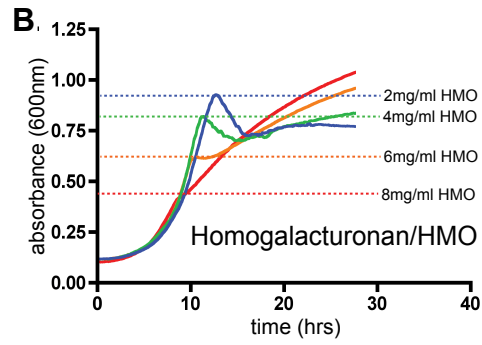

**C.**

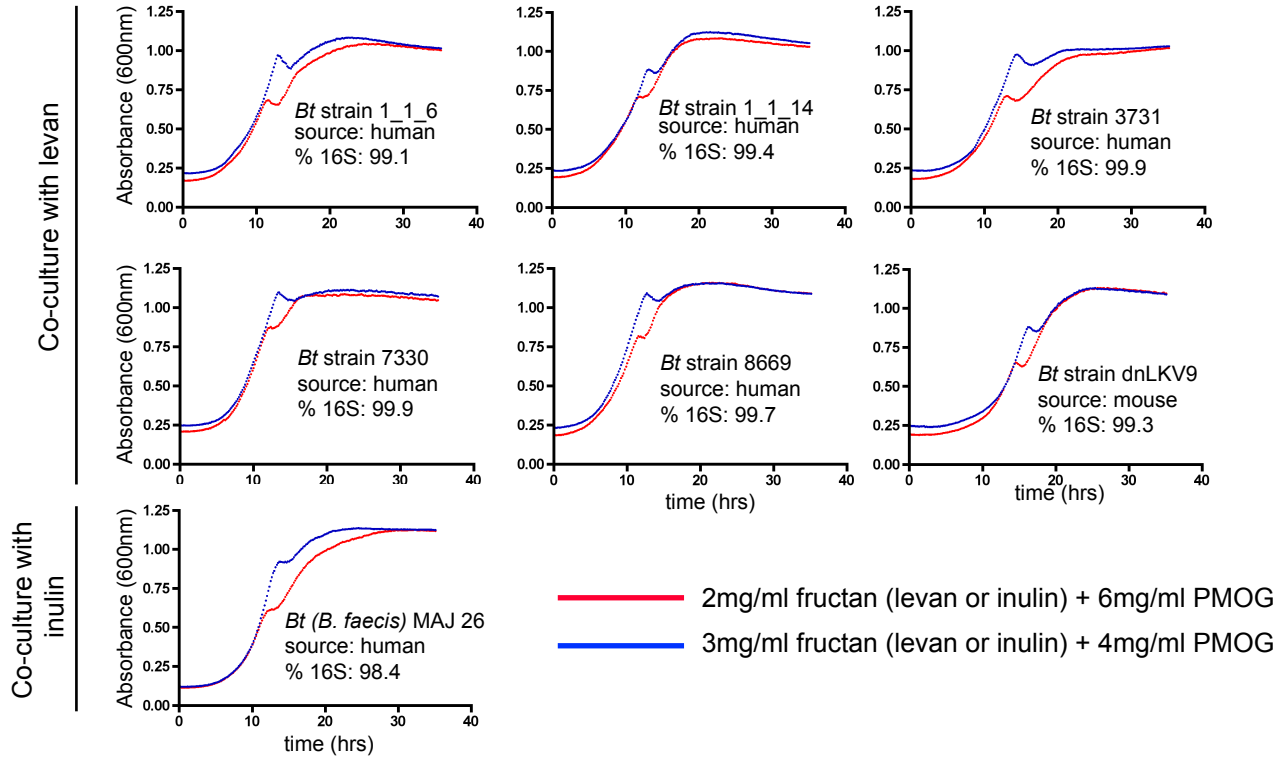

**D.**

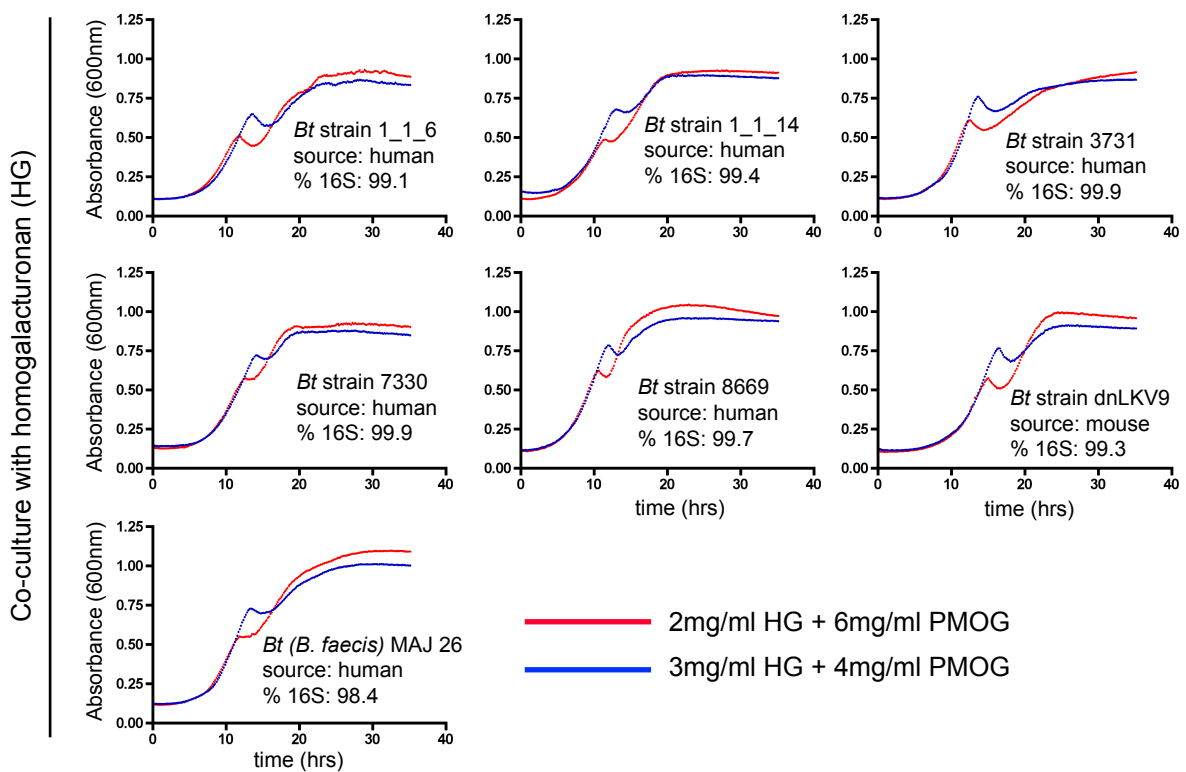

Supplement: mbo006152544sf4.pdf [file mbo006152544sf4.pdf]

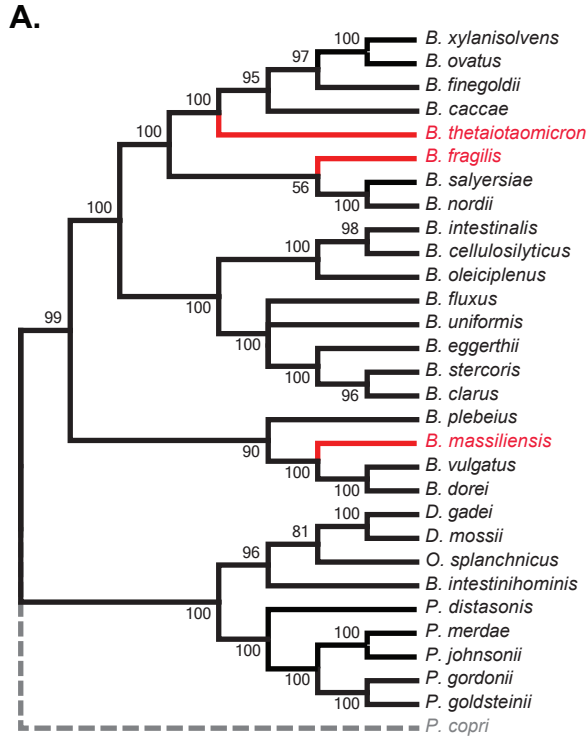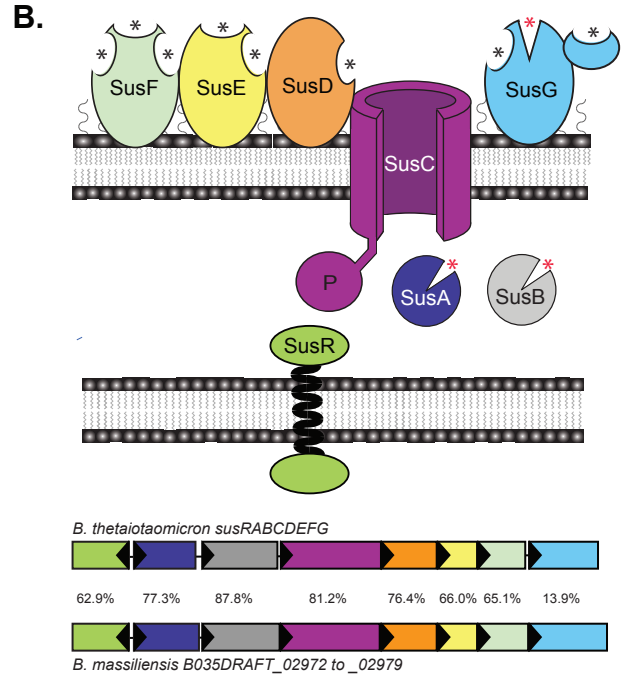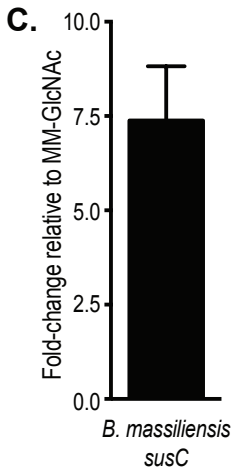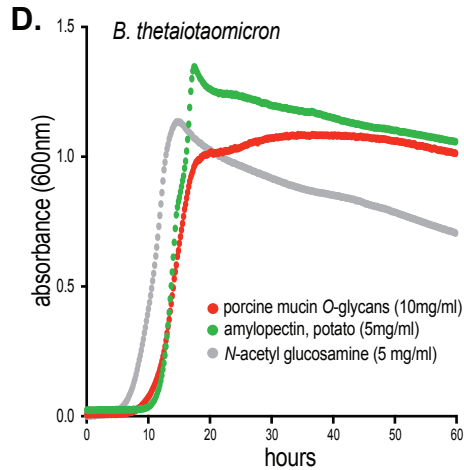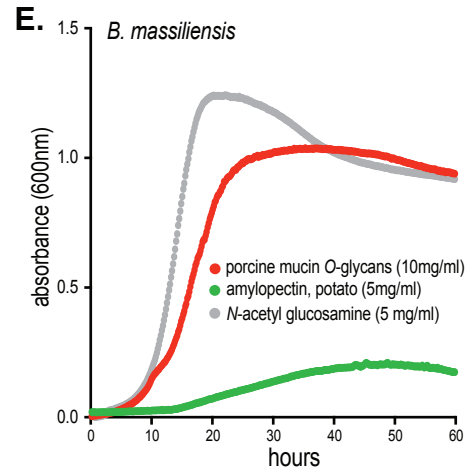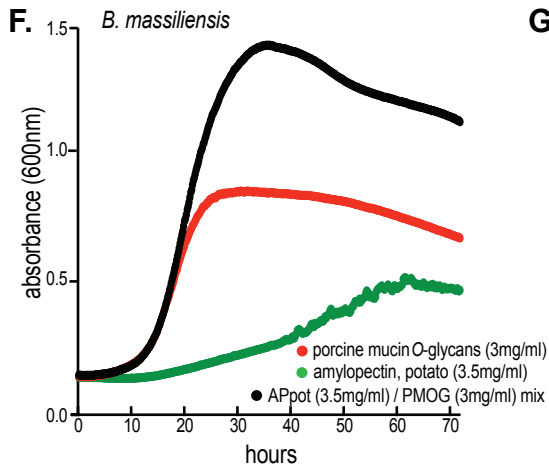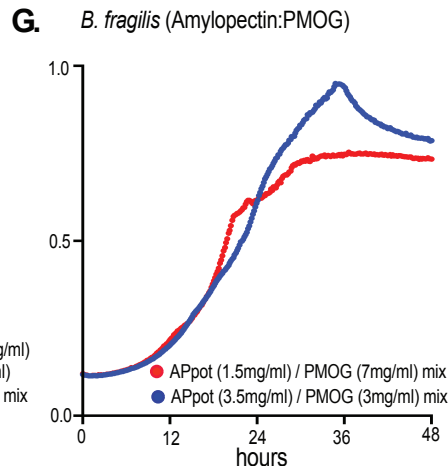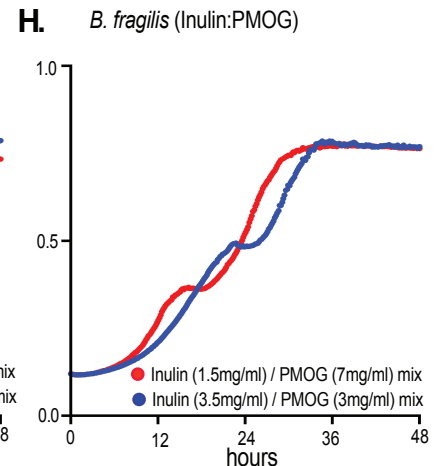

Supplement: mbo006152544sf5.pdf [file mbo006152544sf5.pdf]
